# Supplementary material for: Autophagosome membrane expansion is mediated by the N-terminus and cis-membrane association of human ATG8s
Source: eLife journal article supplement (doi:10.7554/elife.89185), 2023-06-08
Supplement: fig1-data1 [file Source data for Fig. 1.xlsx]

## Sheet: Figure 1
Figure 1B																					Figure 1D																					Figure 1F
	LC3B S3CNBD Relative fluorecence intensity (normalised to no ATP)																					GABARAP K2CNBD Relative fluorecence intensity (normalised to no ATP; n=3: R1, R2, R3)																					LC3B S3CNBD Relative fluorecence intensity
Time (sec)	All			no ATG7			no ATG3			no E3			no ATP			no liposome					Time (sec)	All			no ATG7			no ATG3			no E3			no ATP			no liposome					Time (sec)	S3CNBD			S3CNBD + liposomes			S3CNBD + ATP
	R1	R2	R3	R1	R2	R3	R1	R2	R3	R1	R2	R3	R1	R2	R3	R1	R2	R3				R1	R2	R3	R1	R2	R3	R1	R2	R3	R1	R2	R3	R1	R2	R3	R1	R2	R3				R1	R2	R3	R1	R2	R3	R1
0	0	0	0	0	0	0	0	0	0	0	0	0	0	0	0	0	0	0			0	0	0	0	0	0	0	0	0	0	0	0	0	0	0	0	0	0	0			0	0	0	0	0	0	0	0
20	8.621	9.999	10.998	-1.172	3.883	-0.548	5.781	9.285	10.402	5.702	7.849	9.54	0	0	0	7.878	10.412	10.177			20	16.158	23.27	18.911	-1.072	5.579	-1.881	12.509	5.21	-0.607	10.061	20.06	12.523	0	0	0	14.768	28.253	14.202			20	0	0	0	0	0	0	0
30	19.597	19.142	20.527	-0.026	4.385	-0.936	11.493	14.828	15.434	13.508	15.402	18.095	0	0	0	16.131	19.363	18.697			30	21.937	37.956	44.093	-2.313	9.594	1.451	16.163	10.146	3.857	23.72	32.256	25.514	0	0	0	24.386	51.555	29.417			40	3.102	-0.663	10.367	7.915	-1.516	-0.149	17.986
40	28.591	27.435	30.797	-0.52	5.773	-1.341	14.052	18.792	19.406	19.197	21.879	25.547	0	0	0	21.4	26.698	25.656			40	35.442	57.056	39.433	-3.204	11.299	0.367	12.711	17.597	2.514	32.854	48.896	25.943	0	0	0	29.179	55.958	30.393			60	2.486	-0.02	17.711	6.708	-6.932	-1.417	26.051
50	37.063	35.777	39.564	0.15	6.333	-1.356	17.124	21.704	22.199	25.332	29.07	31.861	0	0	0	26.283	31.694	31.229			50	44.71	65.541	53.702	-3.393	13.153	3.37	13.222	15.639	4.399	42.101	57.831	37.107	0	0	0	36.425	68.51	42.517			80	2.204	-1.313	17.501	1.071	-2.093	-2.441	33.02
60	44.22	43.896	48.221	-0.21	6.235	-1.48	19.09	24.772	25.085	29.192	31.444	36.142	0	0	0	29.536	36.219	36.222			60	52.904	75.804	63.167	-4.062	12.065	-1.781	12.972	14.973	2.316	47.744	61.684	40.401	0	0	0	41.362	70.559	42.744			100	1.412	-2.765	20.358	2.331	-2.897	-3.171	35.739
70	50.822	51.495	56.873	-0.165	5.807	0.247	20.94	26.37	28.836	32.851	34.835	42.607	0	0	0	32.431	39.098	40.895			70	61.082	84.483	71.762	-4.514	14.337	0.853	12.639	15.843	0.755	52.94	71.503	45.525	0	0	0	46.292	75.63	46.346			120	2.43	-2.792	23.875	5.205	-2.825	-3.147	38.628
80	57.212	58.885	64.451	0.362	6.045	-0.105	22.596	28.066	31.379	36.146	37.551	47.744	0	0	0	34.831	41.588	44.988			80	66.549	92.47	76.908	-5.327	13.793	1.303	13.492	18.347	0.357	56.951	75.32	48.502	0	0	0	50.824	78.257	47.67			140	3.058	-2.923	24.769	3.63	-2.474	-2.84	40.375
90	62.848	65.795	71.159	-0.731	5.737	-0.162	22.82	31.431	33.105	37.974	40.126	52.437	0	0	0	36.408	43.423	48.105			90	73.565	100.167	86.93	-4.682	16.011	0.079	12.894	15.07	-1.805	63.219	79.207	54.272	0	0	0	53.963	79.628	49.006			160	3.338	-2.538	25.336	6.549	-0.398	-3.839	41.028
100	67.936	73.43	76.828	-0.563	6.731	-0.529	23.871	32.758	34.266	40.375	43.983	55.561	0	0	0	38.745	46.335	50.984			100	79.021	107.435	99.157	-5.82	12.883	2.021	11.179	12.419	-1.823	66.692	79.345	54.818	0	0	0	55.52	82.04	52.161			180	3.946	-3.397	24.548	6.793	-2.619	-3.234	44.319
110	73.909	81.421	82.601	0.091	7.665	-0.591	25.254	34.037	35.766	42.951	47.074	58.947	0	0	0	40.22	48.432	53.436			110	85.35	111.06	109.917	-5.388	11.411	-3.34	12.381	12.321	-5.229	70.898	80.13	53.857	0	0	0	57.319	84.553	51.996			200	3.973	-4.293	26.239	8.733	-1.798	-3.022	44.904
120	78.554	88.14	88.791	0.196	8.536	-0.216	26.099	35.794	37.699	44.98	49.686	61.781	0	0	0	41.897	51.197	56.273			120	90.393	119.168	122.541	-6.147	13.474	1.809	11.565	17.096	6.333	74.413	84.398	58.475	0	0	0	59.917	84.997	56.09			220	4.796	-4.31	26.653	8.26	-2.247	-2.081	45.626
130	83.23	93.46	93.24	0.144	7.967	-0.717	27.295	36.642	37.983	46.814	51.526	64.183	0	0	0	43.285	51.35	57.999			130	97.253	125.259	130.824	-5.92	10.387	-0.599	11.545	14.282	-0.563	76.115	84.389	57.254	0	0	0	62.304	82.86	53.448			240	6.185	-4.193	27.764	7.882	-2.141	-3.674	47.175
140	86.51	99.165	99.774	-0.242	7.672	1.038	26.991	36.924	40.296	48.486	52.064	68.121	0	0	0	44.398	52.754	61.811			140	101.036	131.945	124.283	-7.662	12.6	-1.974	9.313	10.947	2.12	77.34	89.825	59.527	0	0	0	64.87	87.296	54.914			260	5.998	-4.955	29.095	9.841	-0.191	-1.896	48.782
150	87.538	104.341	103.552	-3.619	7.903	0.364	24.225	38.594	40.433	46.348	53.644	68.722	0	0	0	42.311	53.883	62.411			150	104.572	133.098	135.416	-6.695	11.451	0.494	11.478	12.802	2.125	81.609	91.118	60.739	0	0	0	66.925	87.333	59.019			280	6.132	-5.1	29.581	11.112	-2.292	-1.79	48.631
160	93.979	109.286	108.392	-0.061	8.142	0.298	27.808	38.853	41.307	50.573	54.642	70.694	0	0	0	46.168	54.773	63.942			160	109.1	141.496	139.872	-7.669	12.632	-1.722	10.225	15.504	-0.195	84.31	92.636	62.529	0	0	0	66.678	88.056	56.747			300	6.794	-5.218	29.93	17.618	-1.928	-0.502	49.508
170	97.959	113.418	111.401	0.306	7.276	-0.038	28.861	38.946	41.406	52.218	54.94	71.993	0	0	0	47.26	54.714	64.99			170	113.84	149.95	137.759	-7.298	12.099	-6.746	10.92	14.731	-4.095	87.377	96.84	59.728	0	0	0	67.868	88.642	54.623			320	7.091	-5.247	29.914	15.346	-2.321	0.501	49.849
180	100.862	117.074	116.022	0.066	5.967	-0.083	28.357	38.104	42.345	53.401	55.351	73.994	0	0	0	47.731	54.304	66.524			180	118.669	151.589	142.714	-7.802	11.205	-4.779	9.928	9.319	0.61	88.736	95.389	64.481	0	0	0	67.815	89.707	57.174			340	7.391	-5.085	31.26	13.065	-1.78	-0.825	50.987
190	103.933	121.857	120.037	0.583	6.515	0.355	28.81	38.433	43.11	54.28	57.08	76.07	0	0	0	48.757	54.892	68.044			190	124.583	156.091	146.454	-7.51	10.606	-4.667	10.853	11.528	-4.327	91.823	94.091	62.769	0	0	0	68.463	90.179	57.352			360	7.804	-5.017	31.723	12.784	-3.566	0.882	52.066
200	106.073	125.222	121.795	0.543	6.554	0.179	28.853	37.95	43.663	54.268	56.733	76.644	0	0	0	48.691	55.936	69.997			200	127.221	163.315	151.307	-6.104	11.53	-3.119	12.224	13.379	-5.445	94.614	100.495	66.241	0	0	0	70.422	93.693	60.587			380	8.133	-5.296	32.486	15.298	-6.898	1.227	52.924
210	108.849	130.63	126.695	0.708	8.139	0.395	28.615	41.242	44.089	54.896	59.933	79.294	0	0	0	49.229	57.885	71.424			210	131.507	163.497	165.495	-7.126	11.404	-2.6	11.13	13.895	-5.671	94.657	98.807	67.139	0	0	0	72.106	90.653	59.643			400	8.696	-5.857	31.609	20.891	-4.197	0.431	53.374
220	110.946	135.204	129.835	0.078	8.285	-0.102	28.83	42.242	44.441	55.526	61.33	80.362	0	0	0	49.557	58.616	72.727			220	136.191	171.788	159.6	-6.885	13.509	-1.211	10.435	14.61	-4.591	96.531	103.298	69.024	0	0	0	73.308	93.831	58.999			420	8.895	-6.052	33.295	19.896	-2.687	0.19	54.545
230	114.5	138.251	131.884	0.907	8.678	-0.524	30.143	41.339	44.313	57.257	62.125	80.453	0	0	0	50.763	58.785	73.551			230	135.864	172.753	165.842	-7.258	11.34	-1.274	10.69	12.199	2.519	98.627	102.443	66.096	0	0	0	74.442	92.311	60.715			440	8.895	-6.052	33.295	19.896	-2.687	0.19	54.545
240	116.842	140.874	135.359	0.871	8.115	-0.096	30.161	41.583	44.951	57.671	62.022	82.734	0	0	0	51.055	58.81	75.119			240	141.091	175.4	176.931	-7.869	12.922	-2.187	11.92	10.596	-1.395	100.435	100.984	68.095	0	0	0	74.796	90.629	60.644			460	7.559	-8.0417	34.284	19.019	-4.669	-1.893	58.363
250	117.48	144.191	138.61	1.507	8.597	0.212	31.8	42.368	45.721	58.609	62.564	84.117	0	0	0	51.672	59.261	76.607			250	144.351	184.102	170.842	-6.808	12.169	-3.473	11.417	14.81	-2.335	101.985	103.145	67.148	0	0	0	75.271	92.273	57.966			480	6.12	-9.1513	34.118	21.809	-12.762	-2.66	60.776
260	120.093	147.189	141.159	0.661	8.248	0.006	30.679	42.907	46.091	58.62	62.968	84.674	0	0	0	51.681	59.482	77.414			260	148.192	186.666	183.515	-7.895	11.829	-0.896	9.91	10.729	-1.495	102.435	103.818	73.403	0	0	0	73.561	95.084	62.786			500	5.737	-10.4462	32.13	21.553	-6.036	-3.341	60.835
270	123.295	149.527	143.34	1.176	8.604	1.428	30.506	41.798	46.712	60.47	64.227	87.331	0	0	0	53.06	59.975	78.989			270	151.068	189.399	192.066	-8.834	11.905	-1.564	8.743	11.786	-4.943	102.66	106.305	73.289	0	0	0	73.063	93.892	61.099			520	5.403	-11.1925	31.981	18.356	-5.142	-2.823	62.991
280	124.115	150.876	145.614	0.93	7.34	0.739	30.848	39.937	46.934	59.791	62.066	86.978	0	0	0	52.704	58.703	80.039			280	155.749	192.491	188.933	-7.532	12.064	-3.875	11.115	14.353	-5.818	105.444	106.32	72.097	0	0	0	75.577	94.516	59.902			540	5.452	-11.6028	34.026	20.918	-5.163	-2.98	62.861
290	125.005	154.513	148.038	0.344	7.507	-0.349	30.559	40.929	47.189	60.004	62.917	88.342	0	0	0	52.403	59.195	80.593			290	158.208	195.423	185.542	-8.004	11.592	-5.561	9.967	13.631	-4.19	105.203	106.271	71.579	0	0	0	75.964	93.828	62.314			560	5.701	-13.0622	32.759	21.727	-4.225	-2.441	64.326
300	127.69	156.03	150.357	1.904	7.349	0.638	31.198	40.641	47.614	61.385	62.975	89.518	0	0	0	53.862	59.188	81.63			300	159.199	199.231	196.969	-7.743	11.603	-3.404	10.378	7.927	-5.274	107.357	108.639	72.918	0	0	0	76.102	91.28	58.292			580	4.677	-13.4274	33.42	21.627	-5.079	-3.871	64.42
310	127.249	158.852	152.248	1.418	8.118	0.623	30.775	41.973	47.915	61.623	64.937	90.303	0	0	0	53.771	60.35	82.807			310	164.202	202.551	201.418	-8.057	11.466	-4.646	13.005	8.54	-4.98	107.9	109.619	73.802	0	0	0	77.173	94.429	60.315			600	4.712	-13.8054	32.487	21.921	-5.67	-4.547	64.586
320	129.682	161.768	153.791	1.531	8.713	-0.026	31.277	42.869	47.941	62.163	65.321	91.041	0	0	0	53.973	60.522	83.553			320	166.365	208.997	203.446	-7.945	12.476	-5.825	13.626	10.484	-5.561	109.884	109.371	71.011	0	0	0	77.694	94.79	58.859			620	4.707	-14.8347	33.857	22.296	-5.172	-4.204	66.215
330	130.601	164.533	155.22	0.852	8.545	0.36	30.646	43.45	48.297	61.718	65.573	91.811	0	0	0	53.385	61.052	84.308			330	169.037	209.283	208.642	-7.143	12.578	-5.351	11.19	13.508	-6.835	110.912	109.963	72.133	0	0	0	77.831	96.79	61.797			640	4.029	-15.4106	34.339	23.834	-4.735	-3.673	65.637
340	132.104	165.075	157.806	0.781	8.701	0.865	30.672	43.478	48.98	62.88	65.522	93.206	0	0	0	53.165	61.089	84.534			340	171.929	209.372	213.61	-6.391	9.854	-2.718	10.475	12.057	0.218	110.81	108.249	74.456	0	0	0	78.315	94.985	65.618			660	3.727	-16.2845	35.373	21.944	-4.575	-4.272	65.725
350	133.524	167.562	159.183	1.023	9.057	0.438	31.179	43.821	49.086	63.75	67.18	93.886	0	0	0	53.673	61.326	86.277			350	175.028	215.283	216.56	-7.458	11.569	-1.6	10.872	11.5	-1.567	113.878	111.72	74.9	0	0	0	77.702	94.801	62.916			680	3.412	-16.774	34.383	21.903	-5.039	-4.816	65.841
360	135.233	168.729	160.742	1.505	9.031	0.69	31.94	45.775	49.342	63.852	67.088	94.849	0	0	0	54.764	61.562	87.237			360	177.583	216.076	224.273	-7.884	11.173	-3.058	10.319	9.66	-8.694	113.764	110.414	74.034	0	0	0	77.296	96.326	61.859			700	3.247	-17.2063	33.479	22.194	-4.714	-2.516	65.964
370	136.159	169.714	162.169	1.618	9.005	0.654	33.678	42.386	49.907	64.089	66.937	95.056	0	0	0	54.711	61.129	88.071			370	181.341	218.415	230.888	-7.905	12.635	-3.189	10.163	11.449	-4.131	114.202	111.011	75.133	0	0	0	77.268	93.277	60.722			720	2.218	-17.6115	34.313	21.323	-3.836	-3.152	65.568
380	137.333	169.846	163.116	2.108	7.487	1.034	32.531	41.442	49.83	64.867	65.977	96.045	0	0	0	55.067	59.767	88.546			380	184.853	227.377	230.95	-6.823	13.843	-2.298	11.315	14.974	-0.844	116.198	116.95	79.041	0	0	0	79.057	95.861	62.114			740	2.507	-18.0186	34.245	21.34	-4.288	-3.246	67.892
390	138.416	172.109	164.768	2.202	7.841	0.847	32.2	42.533	50.813	64.89	61.676	97.068	0	0	0	54.808	60.597	89.755			390	185.852	228.037	229.285	-7.229	13.449	-6.042	10.782	9.464	-8.282	117.288	115.409	74.954	0	0	0	78.636	96.502	59.274			760	3.448	-18.4391	34.214	21.394	-4.159	-5.453	67.123
400	138.982	172.78	165.144	2.624	7.385	1.023	31.77	41.425	49.948	64.628	62.695	96.324	0	0	0	54.696	60.314	89.349			400	188.576	230.874	230.731	-6.854	11.071	-3.171	10.544	9.291	-7.742	119.165	115.2	78.492	0	0	0	78.757	93.584	61.265			780	3.208	-19.3364	34.4	21.201	-3.572	-4.589	67.648
410	139.095	175.392	167.441	1.912	8.792	1.083	32.671	43.3	51.002	65.738	65.729	98.098	0	0	0	55.425	61.563	91.021			410	190.973	230.179	239.205	-6.855	11.06	-2.444	10.892	11.124	-6.182	119.396	113.427	81.721	0	0	0	79.879	93.908	62.117			800	2.966	-19.257	35.31	21.91	-4.462	-6.627	67.314
420	140.348	176.898	167.696	2.57	8.881	0.272	32.03	44.354	50.994	65.861	67.28	98.44	0	0	0	55.301	62.055	91.492			420	192.334	238.446	239.113	-5.827	13.348	-5.337	11.616	13.875	-7.598	121.021	115.745	79.002	0	0	0	80.364	95.457	60.452			820	2.66	-20.0569	33.998	24.1	-7.286	-5.418	67.864
430	141.697	178.292	169.466	2.066	8.989	0.759	31.906	44.196	51.189	65.899	67.886	99.295	0	0	0	55.668	62.15	92.46			430	191.006	239.796	248.917	-5.715	13.814	-1.339	12.292	13.39	-4.838	121.498	118.087	83.78	0	0	0	80.471	96.65	64.917			840	2.865	-20.5936	33.953	24.246	-6.353	-3.721	68.48
440	141.388	177.711	170.05	2.59	9.484	1.249	33.073	43.898	51.476	66.794	69.35	100.187	0	0	0	56.449	62.118	93.006			440	197.068	239.311	246.498	-6.024	14.318	-2.374	12.65	10.755	-7.705	122.538	115.892	78.259	0	0	0	80.019	97.086	61.933			860	2.865	-20.5936	33.953	24.246	-6.353	-3.721	68.48
450	143.622	180.084	170.656	2.488	8.616	0.436	33.246	43.172	51.511	66.774	69.069	100.022	0	0	0	56.233	61.734	93.76			450	198.498	247.159	259.697	-5.699	14.663	-0.629	11.697	12.283	-7.732	123.117	121.021	79.624	0	0	0	80.074	96.538	61.066			880	2.785	-21.2191	34.313	22.82	-3.866	-3.439	67.903
460	144.348	180.881	171.906	2.359	9.17	0.639	32.662	44.948	51.614	66.306	69.447	100.458	0	0	0	55.566	61.656	93.994			460	201.399	246.745	264.785	-6.08	15.183	-1.17	12.916	15.238	4.405	124.23	119.189	83.121	0	0	0	79.464	97.279	62.765			900	3.344	-21.7306	34.863	22.221	-4.268	-3.894	69.82
470	144.851	182.328	172.179	2.329	9.126	1.459	32.018	43.423	51.597	66.413	67.943	102.092	0	0	0	55.674	61.664	94.374			470	204.793	251.884	257.352	-8.161	17.141	-4.322	9.234	13.279	-5.021	121.295	122.37	82.182	0	0	0	77.806	97.451	62.116			920	1.884	-22.4032	34.569	22.333	-3.727	-4.697	67.351
480	144.817	181.385	173.154	1.864	7.824	0.476	32.68	42.932	51.715	66.92	66.178	101.289	0	0	0	55.854	60.882	95.066			480	205.876	253.241	259.08	-5.263	15.203	-2.881	11.947	11.533	-5.373	124.75	121.358	81.027	0	0	0	80.248	98.396	63.497			940	2.251	-23.0369	34.927	22.125	-2.619	-5.252	68.05
490	145.924	183.095	174.226	2.404	8.512	-0.035	34.562	43.624	52.552	67.541	67.415	101.974	0	0	0	56.395	61.751	96.097			490	207.414	254.636	263.014	-5.276	16.104	-2.077	11.937	13.98	-6.024	125.261	120.573	83.392	0	0	0	79.872	98.239	63.788			960	1.986	-23.4587	34.729	21.383	-5.113	-4.939	67.899
500	146.653	183.345	175.169	2.586	7.862	0.546	34.477	43.249	52.597	68.292	66.345	102.599	0	0	0	56.719	60.956	96.84			500	209.065	256.056	267.094	-4.922	15.402	0.911	11.826	15.959	-0.555	125.52	120.121	81.893	0	0	0	80.687	97.508	63.583			980	1.675	-24.4227	35.782	21.081	-5.894	-4.082	67.105
510	147.254	184.399	176.479	2.849	9.742	1.093	34.205	44.955	53.16	68.265	68.701	103.451	0	0	0	56.733	63.052	97.819			510	212.414	259.05	271.116	-5.751	18.612	0.961	11.634	14.448	-2.935	126.569	125.495	85.588	0	0	0	80.469	98.272	65.4			1000	1.01	-24.7841	36.073	21.268	-6.331	-5.196	67.395
520	148.066	186.5	176.611	3.391	9.666	0.782	33.949	44.483	52.683	69.118	68.619	103.201	0	0	0	57.209	62.635	97.267			520	213.834	261.241	269.621	-5.039	15.985	-0.053	12.348	14.309	-3.828	127.678	122.147	82.098	0	0	0	81.097	98.228	63.465			1020	0.704	-25.219	34.909	21.101	-7.458	-6.361	67.522
530	148.585	187.841	177.039	2.907	9.243	0.699	34.278	45.621	52.942	68.064	68.877	102.603	0	0	0	55.903	62.558	98.186			530	216.237	263.459	273.311	-3.971	18.801	0.575	14.071	14.361	1.329	129.995	123.146	86.623	0	0	0	82.494	98.207	63.838			1040	0.321	-25.5613	34.985	21.888	-5.364	-4.867	67.238
540	149.187	187.978	177.328	2.962	8.942	0.696	33.774	44.831	52.743	69.548	69.705	104.16	0	0	0	56.835	62.239	99.012			540	218.769	265.6	273.408	-5.153	17.679	-1.357	12.663	17.381	-0.112	129.773	123.655	84.233	0	0	0	81.183	98.505	64.023			1060	0.188	-25.939	33.618	23.907	-2.596	-4.295	67.606
550	149.985	188.427	178.461	3.448	9.4	0.867	34.1	44.986	53.848	69.347	70.727	104.881	0	0	0	57.092	62.834	99.591			550	220.838	271.159	270.583	-5.282	19.27	-2.175	12.617	14.747	-2.791	130.696	127.087	85.638	0	0	0	80.627	97.789	60.479			1080	-0.39	-26.4164	34.815	22.081	-3.418	-5.862	67.47
560	150.173	188.571	177.68	3.115	9.158	-0.017	34.163	44.783	52.038	69.486	70.054	104.15	0	0	0	56.743	62.433	98.716			560	218.801	270.386	274.379	-5.33	16.897	2.375	12.233	12.752	-1.128	130.783	126.178	87.708	0	0	0	80.399	98.724	63.456			1100	-0.211	-26.7564	35.481	22.748	-3.03	-4.693	67.417
570	149.569	188.208	179.092	3.409	8.31	0.523	34.306	43.699	53.221	69.615	68.641	105.745	0	0	0	57.306	61.415	100.072			570	224.726	269.607	276.399	-4.799	15.664	0.124	13.492	13.107	-7.965	132.328	123.051	84.342	0	0	0	80.92	95.965	63.062			1120	-0.238	-27.3285	36.557	20.878	-4.33	-5.123	68.02
580	151.137	188.526	179.673	3.476	9.203	0.551	34.252	44.457	53.43	70.025	70.174	105.766	0	0	0	57.188	62.277	100.687			580	224.112	274.116	280.342	-6.983	18.467	1.437	11.407	17.42	-7.006	131.298	126.175	86.008	0	0	0	79.394	101.199	63.72			1140	-1.24	-27.689	35.747	20.87	-3.772	-4.946	67.958
590	150.538	189.957	179.649	1.851	9.08	0.629	33.031	44.673	53.463	68.69	69.654	106.216	0	0	0	55.895	62.058	101.467			590	226.167	276.572	291.997	-4.816	19.27	5.925	13.056	18.591	-1.906	133.266	126.418	89.23	0	0	0	81.079	99.345	63.223			1160	-0.639	-28.1959	35.735	23.452	-3.223	-4.628	67.415
600	152.543	190.771	179.287	2.793	9.339	1.025	33.845	43.722	53.387	69.393	68.764	106.135	0	0	0	57.004	62.209	101.529			600	229.107	279.124	288.781	-3.831	19.284	3.125	13.909	14.406	1.729	133.972	127.008	89.233	0	0	0	81.124	99.173	63.116			1180	-0.932	-28.609	34.063	25.505	-2.48	-5.71	66.946
610	152.595	191.599	180.506	3.149	10.058	0.248	35.589	45.187	53.594	70.366	70.351	106.477	0	0	0	57.619	62.779	101.813			610	230.485	278.13	299.837	-4.908	19.504	2.773	13.043	13.987	-0.492	134.106	125.638	91.867	0	0	0	81.381	99.986	62.982			1200	-1.112	-28.6819	34.868	24.889	-3.424	-5.044	66.806
620	153.694	192.395	180.683	3.233	10.419	-0.197	34.952	45.558	53.691	71.159	70.582	106.647	0	0	0	57.744	63.41	102.146			620	232.397	282.365	298.932	-4.605	22.528	2.534	12.857	19.269	-1.597	135.123	127.474	90.164	0	0	0	81.283	99.631	63.222			1220	-1.654	-28.8508	36.226	20.75	-2.155	-4.572	67.236
630	154.435	193.124	181.07	4.366	10.359	0.337	35.849	45.484	53.98	71.538	71.15	107.261	0	0	0	58.074	63.668	103.163			630	231.687	287.325	297.777	-4.244	20.753	3.036	13.432	17.187	0.349	135.217	128.776	93.508	0	0	0	80.159	100.026	62.555			1240	-1.669	-29.9536	34.909	20.751	-3.454	-5.279	66.752
640	153.345	192.916	182.005	4.313	10.01	0.416	35.997	45.303	53.728	70.944	71.309	107.167	0	0	0	58.161	63.287	103.197			640	235.066	286.51	294.687	-4.117	20.372	5.232	15.577	14.809	3.795	137.255	129.639	91.042	0	0	0	81.789	98.985	62.504			1260	-1.926	-30.1842	35.305	21.257	-3.1572	-4.863	66.594
650	155.243	193.554	181.554	3.602	9.82	-0.032	35.804	45.895	53.388	71.553	71.671	107.734	0	0	0	57.911	63.064	103.445			650	237.831	287.654	298.076	-3.091	20.09	3.079	15.152	15.294	1.262	138.554	127.553	89.171	0	0	0	82.298	99.639	61.208
660	155.591	193.365	181.83	3.91	9.67	-0.174	35.87	45.572	53.782	71.839	70.572	108.023	0	0	0	58.371	63.191	103.777			660	238.983	284.697	304.443	-3.345	17.313	3.234	14.586	17.008	1.021	138.731	126.834	93.891	0	0	0	81.734	96.08	63.815
670	155.814	193.761	182.503	3.78	8.609	0.744	35.689	44.361	53.573	71.817	69.636	108.703	0	0	0	58.301	61.6	104.046			670	242.259	290.812	306.382	-5.121	19.994	4.118	13.05	18.478	0.546	136.17	128.674	93.054	0	0	0	81.207	96.805	64.372
680	155.799	194.577	182.244	4.434	9.449	0.667	35.176	46.023	53.97	72.112	71.388	108.56	0	0	0	58.394	62.745	104.65			680	240.606	295.226	297.314	-4.298	23.529	3.107	13.965	18.658	1.519	138.425	135.486	95.113	0	0	0	81.376	102.543	64.651
690	156.344	193.843	182.208	4.101	8.583	-0.26	35.18	44.88	54.543	72.49	71.227	108.892	0	0	0	58.279	62.171	105.083			690	241.828	293.257	303.983	-3.834	24.06	6.49	14.752	18.518	3.753	138.99	133.046	97.001	0	0	0	82.237	102.985	68.983
700	156.679	195.717	182.68	4.278	10.386	0.252	35.636	46.092	54.13	72.46	72.628	109.018	0	0	0	58.808	63.544	105.709			700	244.299	298.892	308.749	-3.571	23.264	4.7	15.024	21.479	-2.419	139.516	136.905	94.81	0	0	0	81.424	100.548	63.037
710	156.133	193.706	182.532	4.363	10.001	0	35.503	45.681	54.163	72.735	71.951	109.056	0	0	0	59.049	63.039	105.771			710	245.977	295.025	317.424	-3.338	20.898	9.267	16.103	19.604	1.811	139.934	132.013	98.862	0	0	0	82.14	101.231	67.758
720	157.409	195.775	183.287	3.896	9.872	0.369	35.371	45.939	54.354	72.426	72.574	109.447	0	0	0	58.477	63.515	106.562			720	245.907	302.557	315.467	-2.736	25.06	9.736	17.838	20.04	-1.366	141.612	137.087	100.251	0	0	0	82.088	103.592	68.116
730	157.741	197.042	183.174	4.446	10.114	0.139	35.664	45.69	54.81	71.854	71.862	108.341	0	0	0	58.128	63.355	106.217			730	247.468	297.884	315.896	-1.379	23.596	6.563	18.304	17.115	-0.386	144.629	133.633	97.698	0	0	0	82.139	100.947	66.222
740	157.918	197.433	183.576	4.093	9.941	0.426	36.385	47.749	54.625	72.508	73.344	109.871	0	0	0	58.754	63.169	107.081			740	248.551	301.138	322.274	-1.773	24.504	10.359	18.192	22.537	4.364	144.408	136.637	104.132	0	0	0	82.066	101.415	67.243
750	158.642	197.631	183.311	4.425	10.303	-0.333	35.996	46.007	54.017	72.627	72.762	109.61	0	0	0	59.204	63.659	107.072			750	249.816	303.153	333.876	-2.641	24.442	7.314	16.357	25.631	0.677	143.875	137.665	102.057	0	0	0	81.339	101.699	67.572
760	158.649	195.969	183.345	4.641	8.72	-0.509	35.991	45.43	53.943	72.574	71.351	109.616	0	0	0	59.341	62.137	107.132			760	248.131	304.48	322.518	-2.601	27.099	8.232	15.081	21.872	3.681	143.155	141.278	104.32	0	0	0	80.543	104.368	68.687
770	158.205	197.171	183.41	4.811	9.575	-0.479	36.432	46.194	54.33	73.729	71.887	110.056	0	0	0	59.984	62.866	107.515			770	253.401	306.29	324.219	-2.682	25.239	6.699	15.896	19.153	4.834	144.163	139.571	104.009	0	0	0	80.717	102.177	65.589
780	159.563	197.211	183.628	4.504	9.454	-0.12	36.255	46.065	54.246	73.643	71.93	110.423	0	0	0	59.431	62.944	107.766			780	254.316	306.06	320.108	-2.992	26.513	6.947	16.1	20.517	5.121	144.409	138.988	102.976	0	0	0	80.55	100.939	67.151
790	159.918	197.357	182.703	4.489	8.898	-0.538	36.603	45.537	53.62	74.156	72.35	109.538	0	0	0	59.269	62.356	107.715			790	255.245	306.828	322.706	-1.625	24.603	6.91	18.312	23.276	8.759	144.984	138.711	103.839	0	0	0	81.834	100.411	67.483
800	160.203	198.433	181.745	5.131	10.691	-0.318	36.678	46.223	53.457	73.762	72.461	109.464	0	0	0	59.351	63.691	107.773			800	255.409	311.256	324.736	-3.222	26.162	8.793	15.125	25.041	3.874	143.182	143.335	104.789	0	0	0	79.545	101.607	65.472
810	160.24	198.326	183.118	4.902	10.802	-0.293	36.4	46.891	53.805	73.899	73.836	110.359	0	0	0	59.561	64.088	108.296			810	257.462	310.75	323.153	-2.3	25.901	8.809	16.907	20.965	4.537	145.13	141.625	105.717	0	0	0	80.394	102.44	67.279
820	161.195	199.014	182.587	5.516	11.168	-1.442	36.576	46.597	53.913	74.377	73.729	110.208	0	0	0	59.708	63.782	108.348			820	257.774	310.261	326.409	-0.574	26.149	9.619	19.726	22.191	5.169	147.294	141.051	105.659	0	0	0	81.366	101.505	66.396
830	160.794	198.872	183.272	5.349	10.595	-0.548	36.622	46.897	53.689	74.154	73.676	110.578	0	0	0	59.734	64.07	108.79			830	256.91	314.215	331.786	-0.981	26.819	12.702	19.579	25.276	4.517	147.717	145.005	107.633	0	0	0	81.323	103.998	67.695
840	159.997	197.996	183.891	4.825	10.061	-0.176	37.29	46.995	54.439	74.082	73.15	110.999	0	0	0	59.456	63.581	109.317			840	260.664	312.293	340.239	-1.273	28.921	13.524	17.121	23.635	4.9	147.467	146.122	111.408	0	0	0	80.239	101.542	67.792
850	160.944	199.369	183.378	4.807	10.585	-0.86	37.34	48.073	53.838	74.258	73.589	111.053	0	0	0	59.403	63.913	109.337			850	262.41	315.173	339.359	-1.712	28.167	11.358	16.429	22.142	4.921	147.397	145.475	107.878	0	0	0	80.361	103.069	68.66
860	160.818	198.673	183.299	4.839	9.027	-0.917	37.036	45.33	53.758	74.635	72.045	110.644	0	0	0	59.596	62.748	109.391			860	264.28	311.862	333.192	-0.566	27.417	11.44	17.528	21.089	2.152	147.492	143.188	108.39	0	0	0	81.18	102.197	68.093
870	161.201	200.064	183.657	4.759	10.321	-0.318	36.965	46.757	54.204	74.422	73.329	111.668	0	0	0	59.981	63.503	109.665			870	264.072	312.462	338.508	-0.842	26.799	11.294	18.154	23.726	3.487	148.624	143.861	105.591	0	0	0	81.082	100.456	66.348
880	161.857	199.165	183.065	5.231	9.624	-0.593	38.799	46.433	53.971	75.328	72.862	111.614	0	0	0	60.716	63.304	109.987			880	265.246	315.427	346.003	-2.256	29.743	13.981	16.237	26.592	6.206	146.628	149.15	111.877	0	0	0	79.262	102.216	69.753
890	162.139	200.479	182.77	5.156	10.111	-0.75	37.952	46.897	53.887	75.573	73.959	111.066	0	0	0	60.604	63.744	110.021			890	264.418	316.695	332.823	-0.943	28.755	12.488	17.246	22.025	4.168	148.618	147.672	111.588	0	0	0	80.525	102.204	69.507
900	162.49	200.195	182.356	5.529	10.01	-0.965	37.821	46.447	53.641	75.659	74.404	111.178	0	0	0	60.43	63.596	110.425			900	268.13	314.275	337.003	-0.377	29.718	10.66	18.714	25.099	1.435	150.167	145.888	108.077	0	0	0	81.429	100.164	70.002
910	163.12	199.017	182.597	5.244	10.606	-1.183	38.102	47.411	53.663	75.77	74.853	111.115	0	0	0	60.359	63.56	110.205			910	268.089	316.897	347.152	0.37	30.282	12.036	20.604	25.271	6.962	150.881	147.791	111.04	0	0	0	79.382	102.156	71.789
920	163.493	201.341	181.861	5.92	10.464	-2.016	38.683	47.302	52.745	76.267	74.631	111.021	0	0	0	60.918	63.572	109.858			920	268.857	317.788	350.076	0.928	31.789	12.814	21.677	28.074	9.787	152.034	149.038	112.7	0	0	0	80.956	102.945	73.065
930	164.351	200.632	181.991	6.167	10.179	-1.518	38.894	47.177	52.445	76.757	74.392	111.561	0	0	0	60.973	63.411	110.601			930	272.203	318.606	346.653	1.889	28.369	12.006	20.444	26.855	8.307	155.01	150.554	116.465	0	0	0	81.904	102.494	72.772
940	163.66	200.842	183.471	6.133	9.803	-1.152	38.516	47.575	53.506	77.107	74.384	111.644	0	0	0	60.855	63.61	111.157			940	269.931	318.72	346.06	2.201	30.847	11.553	20.195	25.27	5.123	154.615	148.442	114.734	0	0	0	79.348	102.891	74.147
950	162.993	199.594	184.166	5.962	8.787	-1.267	37.598	45.597	53.386	76.145	72.964	111.255	0	0	0	60.618	62.334	110.894			950	271.5	321.217	350.185	2.264	31.292	12.208	19.723	29.219	3.604	154.088	150.18	112.834	0	0	0	77.789	102.004	72.94
960	163.947	200.784	184.616	6.048	10.589	-1.446	37.943	46.943	53.561	76.625	74.229	111.684	0	0	0	61.18	63.561	111.564			960	268.968	314.446	352.363	1.675	28.526	12.447	20.09	25.906	6.65	153.702	147.808	115.192	0	0	0	77.996	101.679	74.6
970	162.182	201.75	183.707	5.574	10.696	-1.813	37.262	47.613	53.209	75.941	74.648	111.802	0	0	0	60.451	64.062	110.848			970	271.602	316.566	346.354	1.434	33.218	12.996	19.233	25.021	8.765	152.864	153.317	116.99	0	0	0	78.067	104.1	71.589
980	163.602	200.381	184.006	5.843	9.87	-1.57	37.643	47.385	53.813	76.165	73.657	111.948	0	0	0	60.853	63.249	111.675			980	272.872	315.664	355.46	1.717	31.353	11.203	19.863	22.786	4.099	153.808	152.43	116.241	0	0	0	78.822	101.719	71.257
990	163.47	202.106	183.403	5.694	10.977	-1.652	38.039	48.618	53.439	76.316	75.389	111.511	0	0	0	60.68	64.276	111.976			990	273.939	318.37	350.134	2.015	34.01	15.28	20.136	25.4	8.996	154.01	152.4	117.864	0	0	0	79.207	101.801	70.928
1000	163.774	202.485	182.234	4.725	11.072	-1.075	37.399	47.545	52.786	75.547	74.965	112.293	0	0	0	60.56	64.442	111.563			1000	275.374	319.294	350.692	1.705	31.146	15.759	19.411	26.458	4.756	152.817	151.723	115.011	0	0	0	78.883	100.046	70.143
1010	164.709	202.335	182.432	6.207	11.114	-1.621	38.564	48.157	53.276	77.3	75.906	111.896	0	0	0	61.481	64.298	112.195			1010	275.882	322.657	356.038	2.845	33.402	18.833	21.819	26.616	7.645	156.585	156.863	119.654	0	0	0	80.055	104.659	71.851
1020	164.997	202.56	182.204	6.385	11.275	-2.172	38.642	48.309	53.033	77.485	75.556	112.272	0	0	0	61.956	64.597	112.423			1020	276.614	320.65	355.285	4.007	32.755	14.727	23.439	24.966	9.258	158.233	155.219	117.318	0	0	0	79.894	102.655	71.121
1030	165.078	202.2	182.178	6.28	10.974	-1.667	38.615	49.157	52.956	77.177	75.484	112.243	0	0	0	61.571	64.448	112.114			1030	279.786	319.546	357.875	3.963	33.182	15.529	21.663	29.23	9.207	159.144	154.365	117.618	0	0	0	79.889	101.965	71.723
1040	164.776	201.013	182.607	6.092	10.756	-1.912	39.396	48.54	52.941	77.079	75.554	112.29	0	0	0	61.657	64.35	112.397			1040	278.787	319.783	357.107	4.603	34.235	18.689	21.399	30.893	9.963	158.959	155.861	119.364	0	0	0	77.02	105.05	73.07
1050	164.657	201.779	183.172	6.633	10.203	-2.101	38.814	46.95	52.969	77.742	74.875	112.214	0	0	0	61.753	63.212	112.49			1050	279.818	320.378	354.151	4.846	35.467	18.189	21.142	28.884	12.12	158.167	159.781	120.345	0	0	0	78.861	102.856	72.814
1060	164.438	202.673	183.072	5.935	10.944	-1.745	38.934	48.404	52.845	77.583	75.617	111.955	0	0	0	61.382	64.132	112.345			1060	280.943	321.929	355.077	4.685	35.294	19.323	22.689	30.846	10.188	159.61	158.67	117.499	0	0	0	80.284	103.713	73.252
1070	165.096	203.378	183.941	6.699	10.722	-1.501	39.559	48.263	52.526	78.058	74.896	112.424	0	0	0	62.02	64.043	112.863			1070	281.234	320.622	355.821	4.239	36.949	19.094	20.888	30.585	12.11	158.558	158.988	119.796	0	0	0	78.367	103.976	74.363
1080	165.536	202.428	183.348	6.556	10.699	-2.036	40.067	47.998	52.886	77.943	75.522	112.193	0	0	0	61.943	63.99	112.649			1080	282.47	321.317	356.25	4.117	38.169	17.3	20.761	33.102	11.339	158.736	162.759	122.534	0	0	0	79.307	104.067	75.807
1090	165.467	202.15	183.188	6.61	10.506	-2.32	39.195	47.897	52.195	78.002	75.875	111.97	0	0	0	61.887	64.08	112.471			1090	281.037	321.674	359.483	3.758	35.673	19.599	20.957	26.908	10.492	159.173	158.348	122.812	0	0	0	79.143	103.772	75.492
1100	165.014	202.686	182.787	6.205	10.625	-2.746	38.666	47.655	52.023	77.989	76.185	111.901	0	0	0	61.799	63.916	112.308			1100	283.763	321.702	358.803	4.353	36.938	18.49	22.67	27.108	10.453	160.308	161.095	122.287	0	0	0	79.857	103.055	75.093
1110	165.7	201.037	182.345	6.695	10.847	-2.585	39.379	47.995	52.185	78.421	76.465	111.498	0	0	0	62.163	64.143	112.691			1110	284.984	318.989	354.084	4.674	36.082	18.068	21.903	30.286	13.065	160.825	159.65	122.145	0	0	0	77.312	101.494	77.452
1120	165.72	202.712	182.293	6.498	10.811	-2.463	39.621	47.767	52.166	78.175	75.786	112.116	0	0	0	62.077	63.665	113.004			1120	284.023	323.028	354.297	4.949	37.432	18.767	21.536	32.397	12.674	162.089	161.215	123.517	0	0	0	78.626	102.587	75.667
1130	166.418	202.565	180.816	6.567	10.873	-2.618	40.191	48.015	51.199	78.228	75.784	110.62	0	0	0	62.253	63.919	112.212			1130	283.943	317.881	357.227	6.747	35.867	21.67	22.054	30.21	9.426	162.36	159.133	126.462	0	0	0	80.245	100.449	75.74
[truncated: 18 more columns]
