# Supplementary material for: Autophagosome membrane expansion is mediated by the N-terminus and cis-membrane association of human ATG8s
Source: eLife journal article supplement (doi:10.7554/elife.89185), 2023-06-08
Supplement: fig1-figsupp2-data1 [file Source data for Fig.1-S2.xlsx]

## Sheet: Figure 1-figure supplement 2
Figure 1-figure supplement 2			Quantification of lipidation efficiency % (lipidated form /total)
Time (min)	LC3B WT-50DOPE			LC3B ΔN11-50DOPE			LC3B WT-ER-like			LC3B ΔN11-ER-like			GAB WT-50DOPE			GAB ΔN9-50DOPE			GAB WT-ER-like			GAB ΔN9-ER-like
	R1	R2	R3	R1	R2	R3	R1	R2	R3	R1	R2	R3	R1	R2	R3	R1	R2	R3	R1	R2	R3	R1	R2	R3
0	4.67	4.07	0.16	0.25	1.99	0.41	5.24	1.66	5.94	1.13	2.7	1.54	2.84	0.49	1.74	9.34	1.46	1.2	6.03	0.4	0.21	5.42	0.27	0.43
10	33.06	45.11	27.27	17.88	33.71	14.17	27.01	38.04	22.42	7.91	24.7	13.61	17.28	11.93	13.54	30.66	23.29	23.09	13.92	11.91	8.49	20.3	14.98	9.48
20	49	50.96	43.56	27.33	36.46	17.12	33.93	49.86	29.62	8.98	27.51	14.36	24.47	15	21.36	37.56	35.51	27.65	18.28	15.87	11.86	25.32	23.79	14.09
60	64.87	65.69	68.7	33.36	38.13	20.39	52.1	53.43	50.3	10.06	29.67	16.54	48.83	32.85	51.84	54.33	58.04	65.81	27.86	29.61	25.64	37.37	35.93	22.22
90	70.44	65.66	71.32	32.67	42.69	22.49	54.59	53.02	52.23	16.04	38.83	16.96	59.41	45.11	63.05	59.79	68.65	67.34	42.43	41.56	36.44	41.43	45.2	33.23
