# Supplementary material for: Autophagosome membrane expansion is mediated by the N-terminus and cis-membrane association of human ATG8s
Source: eLife journal article supplement (doi:10.7554/elife.89185), 2023-06-08
Supplement: fig3-data1 [file Source data for Fig.3_Fig.3.xlsx]

## Sheet: Figure 3
Figure 3D																												Figure 3E
	LC3B S3CNBD-his Relative fluorecence intensity (n=5)																											LC3B-his: F(bound)max/F(free)max
Wavelength (nm)	S3CNBD-his					S3CNBD-his + POPC-NTA					S3CNBD-his + DOPC-NTA					S3CNBD-his + 50POPE-NTA					S3CNBD-his + 50DOPE-NTA							S3CNBD-his					K42CNBD-his					L44CNBD-his					R69CNBD-his					R70CNBD-his
	R1	R2	R3	R4	R5	R1	R2	R3	R4	R5	R1	R2	R3	R4	R5	R1	R2	R3	R4	R5	R1	R2	R3	R4	R5			R1	R2	R3	R4	R5	R1	R2	R3	R4	R5	R1	R2	R3	R4	R5	R1	R2	R3	R4	R5	R1	R2
500	0.0633267	0.0652508	0.0610098	0.0557993	0.0570087	0.448616	0.609552	0.39746	0.183615	0.18255	0.287205	0.601888	0.471547	0.253785	0.228945	0.802846	1.15514	0.78603	0.318632	0.372858	0.637351	0.926595	0.735919	0.351884	0.373576			2.50209	3.473	3.2583	2.31128	2.30679	1.82416	1.81708	1.77959	1.52628	1.52841	1.54423	1.4179	1.88744	1.41295	1.3469	1.02	1.16404	1.15223	1.18928	1.35477	1.09174	1.02222
500.2	0.0643045	0.0664443	0.0620852	0.0571152	0.0580796	0.435222	0.593273	0.393358	0.18427	0.181927	0.288325	0.597542	0.478481	0.25567	0.230659	0.777059	1.1131	0.769547	0.315565	0.368548	0.627746	0.912708	0.730865	0.354172	0.372993
500.4	0.0662791	0.0685737	0.064622	0.059722	0.0603356	0.409664	0.558243	0.384492	0.184847	0.181117	0.29073	0.59013	0.49022	0.259722	0.234331	0.726526	1.03579	0.738078	0.311499	0.360591	0.611318	0.887376	0.722042	0.357898	0.372215
500.6	0.0673578	0.0694699	0.0658322	0.0611862	0.0614003	0.397663	0.544328	0.380948	0.185482	0.180763	0.292445	0.586864	0.494822	0.262377	0.236288	0.70346	0.999568	0.723665	0.310032	0.356732	0.604826	0.878118	0.719446	0.359597	0.371941
500.8	0.0696037	0.071427	0.0684076	0.0639806	0.0636775	0.372058	0.515697	0.376428	0.187418	0.180012	0.297089	0.57947	0.507019	0.267782	0.240142	0.664112	0.936062	0.698772	0.307271	0.350971	0.593194	0.864151	0.718554	0.364568	0.372925
501	0.0714077	0.0732895	0.0704314	0.0661678	0.0657217	0.356095	0.49725	0.37437	0.189622	0.180879	0.301361	0.576531	0.516253	0.272384	0.24396	0.639301	0.890804	0.681912	0.306077	0.347906	0.586399	0.85605	0.721658	0.36857	0.375177			Figure 3F
501.2	0.072754	0.0746391	0.0720426	0.0679808	0.0673529	0.345542	0.484514	0.373395	0.192096	0.181963	0.30509	0.575446	0.523058	0.276102	0.247328	0.620902	0.857133	0.670099	0.305546	0.346031	0.581811	0.851032	0.724503	0.372333	0.376617
501.4	0.074782	0.0764185	0.0747318	0.0701868	0.0693289	0.334292	0.471903	0.371777	0.195277	0.184019	0.309409	0.575698	0.532963	0.28103	0.252065	0.601993	0.825588	0.6609	0.306067	0.345075	0.579084	0.843775	0.726004	0.37761	0.379235
501.6	0.0764877	0.0777201	0.0767373	0.0720577	0.0709551	0.326529	0.463208	0.371198	0.197584	0.185797	0.313471	0.576858	0.540961	0.285248	0.256095	0.586969	0.80094	0.654794	0.306643	0.344725	0.577953	0.840298	0.728658	0.382098	0.381794
501.8	0.0788769	0.0796658	0.0793203	0.0743887	0.0731016	0.319789	0.453818	0.371546	0.20123	0.188312	0.318813	0.580036	0.550691	0.291119	0.261327	0.575459	0.7763	0.651904	0.308502	0.345791	0.579783	0.839514	0.735846	0.388554	0.386005			GABARAP-his: F(bound)max/F(free)max
502	0.0808325	0.081447	0.0815579	0.076244	0.0748809	0.315426	0.446486	0.371675	0.204323	0.190374	0.323204	0.581731	0.560017	0.295999	0.265763	0.567528	0.758972	0.651124	0.310206	0.34707	0.580833	0.839655	0.742495	0.394146	0.389588			K2CNBD-his						A39CNBD-his						R40CNBD-his				R65CNBD-his				K66CNBD-his
502.2	0.0831462	0.0834903	0.0836919	0.0786899	0.0772161	0.311463	0.441309	0.373197	0.208421	0.193383	0.329417	0.586661	0.571208	0.301774	0.271327	0.559921	0.743223	0.649806	0.313836	0.349622	0.582104	0.843721	0.751026	0.400948	0.395174			R1	R2	R3	R4	R5	R6	R1	R2	R3	R4	R5	R6	R1	R2	R3	R4	R1	R2	R3	R4	R1	R2
502.4	0.084877	0.0853244	0.0855965	0.080603	0.0791002	0.308556	0.438069	0.374695	0.211972	0.196061	0.33531	0.591226	0.581113	0.30612	0.275948	0.554027	0.730974	0.649854	0.316842	0.35211	0.58373	0.847098	0.758247	0.406483	0.399895			2.21459	2.22542	2.32861	2.42151	2.19316	2.01163	2.1973	2.16382	1.88289	2.56835	2.04185	1.56319	1.47036	1.56319	1.60252	1.53785	1.80621	1.56319	1.35484	1.69618	1.82817	1.94935
502.6	0.0874489	0.0877436	0.0882669	0.0832215	0.0813785	0.306785	0.437171	0.379285	0.216586	0.199975	0.341888	0.597766	0.593165	0.312677	0.28189	0.551052	0.722623	0.651426	0.321218	0.356336	0.589074	0.85371	0.766474	0.414015	0.406144
502.8	0.0894902	0.0893947	0.0902736	0.0852501	0.083257	0.306015	0.437287	0.383234	0.220124	0.203086	0.347226	0.603251	0.603337	0.318156	0.28665	0.549816	0.716711	0.653562	0.324422	0.359876	0.593966	0.858349	0.774741	0.420589	0.411519
503	0.0919165	0.0920855	0.0927383	0.0877725	0.0856262	0.306761	0.437048	0.38836	0.224722	0.207529	0.354229	0.611038	0.615058	0.325387	0.292757	0.550161	0.71462	0.65821	0.329684	0.364891	0.59996	0.866404	0.786157	0.429351	0.418671
503.2	0.0936976	0.0941349	0.0947595	0.0898661	0.08765	0.307654	0.437153	0.391969	0.228666	0.210941	0.359948	0.617437	0.62503	0.331254	0.297677	0.551211	0.714386	0.662239	0.333922	0.369011	0.605533	0.874165	0.795115	0.436519	0.424536
503.4	0.0962095	0.0966161	0.0974276	0.0924552	0.0901052	0.309376	0.441098	0.398415	0.233926	0.215403	0.367242	0.625746	0.637887	0.33833	0.304424	0.554773	0.715114	0.668385	0.339827	0.375065	0.613623	0.884223	0.806883	0.445249	0.432308
503.6	0.0981039	0.0984994	0.0998173	0.094664	0.0921908	0.310843	0.444645	0.40397	0.23803	0.219201	0.373064	0.632607	0.648297	0.343972	0.309924	0.557793	0.717102	0.673482	0.344759	0.380152	0.620834	0.893265	0.816359	0.452208	0.438796
503.8	0.100789	0.100969	0.10271	0.097278	0.0947545	0.313923	0.449454	0.410461	0.2433	0.224249	0.380293	0.64273	0.661974	0.351678	0.316833	0.562437	0.721746	0.682468	0.351045	0.386833	0.630289	0.906584	0.829182	0.461531	0.447132
504	0.102972	0.103169	0.105003	0.099404	0.0969052	0.315912	0.454183	0.415742	0.247614	0.228235	0.38554	0.650713	0.67205	0.35753	0.322523	0.567049	0.726136	0.690007	0.356493	0.39229	0.637636	0.918209	0.839614	0.468761	0.454159
504.2	0.105975	0.106064	0.107877	0.102381	0.0997483	0.319823	0.459664	0.423192	0.253119	0.233295	0.392792	0.661619	0.684731	0.365464	0.329748	0.574471	0.732877	0.700293	0.363702	0.399545	0.648003	0.931126	0.853552	0.478213	0.462689
504.4	0.108319	0.108368	0.110202	0.104735	0.101938	0.323065	0.464421	0.429024	0.257805	0.237445	0.398956	0.670656	0.695708	0.371785	0.335738	0.580616	0.738504	0.709188	0.369584	0.405491	0.656238	0.941961	0.864615	0.486095	0.469946
504.6	0.111537	0.111098	0.113097	0.107631	0.104827	0.327738	0.47192	0.436632	0.263681	0.242785	0.407206	0.68206	0.708578	0.379705	0.343178	0.588862	0.746926	0.7203	0.376639	0.413705	0.666972	0.956643	0.878905	0.495905	0.479443
504.8	0.113997	0.113133	0.11545	0.109969	0.107199	0.331833	0.477777	0.44323	0.268503	0.247237	0.414035	0.691808	0.719108	0.386064	0.349255	0.595348	0.75398	0.729243	0.382549	0.420286	0.675777	0.9689	0.891054	0.503746	0.487114
505	0.116985	0.116131	0.118428	0.113044	0.110164	0.337369	0.485914	0.451118	0.274784	0.252677	0.42218	0.704793	0.732952	0.394131	0.35694	0.604552	0.764086	0.741164	0.39005	0.428612	0.686931	0.984974	0.906859	0.51385	0.496954
505.2	0.11946	0.118676	0.120797	0.115573	0.11269	0.341634	0.492179	0.457552	0.279728	0.257234	0.428748	0.714995	0.744278	0.400837	0.363347	0.611865	0.773024	0.750911	0.396584	0.435232	0.696375	0.997216	0.919351	0.522161	0.504929
505.4	0.122612	0.121743	0.123768	0.118876	0.115781	0.347744	0.500752	0.466911	0.285838	0.263156	0.437415	0.727489	0.757939	0.40948	0.371215	0.62179	0.784999	0.76385	0.404832	0.443861	0.708377	1.01309	0.935168	0.532516	0.514941
505.6	0.125057	0.124219	0.126511	0.121499	0.118293	0.352627	0.507235	0.47447	0.290675	0.268039	0.443947	0.737963	0.769677	0.416491	0.377511	0.629936	0.794166	0.775189	0.411465	0.450988	0.718663	1.02563	0.948456	0.540923	0.523078
505.8	0.128373	0.126972	0.130035	0.124881	0.12151	0.359271	0.515972	0.483842	0.297203	0.273996	0.452324	0.751389	0.783837	0.425139	0.385795	0.640485	0.807216	0.787835	0.419915	0.460039	0.73131	1.04232	0.964844	0.551717	0.533664
506	0.131038	0.129366	0.132587	0.127531	0.124169	0.364728	0.523011	0.490947	0.302209	0.27881	0.459469	0.76272	0.795106	0.432088	0.392392	0.649166	0.817844	0.797965	0.426444	0.467218	0.741522	1.05593	0.978689	0.560669	0.542189
506.2	0.134539	0.132954	0.136224	0.130887	0.127494	0.371102	0.532198	0.500945	0.308711	0.285125	0.467813	0.776187	0.809547	0.441036	0.400842	0.659762	0.830518	0.811783	0.434786	0.476653	0.754306	1.07335	0.994212	0.571415	0.552938
506.4	0.13738	0.135693	0.138835	0.133752	0.130114	0.376816	0.539357	0.508841	0.313945	0.289993	0.474628	0.787283	0.821496	0.44827	0.407686	0.668348	0.841082	0.823072	0.441651	0.484275	0.764437	1.08751	1.00729	0.579998	0.561445
506.6	0.141222	0.13924	0.142369	0.137384	0.133475	0.383442	0.550018	0.518268	0.320701	0.296376	0.483133	0.800458	0.836727	0.457518	0.416455	0.67911	0.855066	0.837143	0.450314	0.493941	0.777469	1.1049	1.02463	0.591278	0.572283
506.8	0.144296	0.142143	0.145269	0.140321	0.136198	0.388947	0.558826	0.525982	0.326112	0.301509	0.489629	0.811352	0.848349	0.464994	0.423378	0.688369	0.866703	0.847983	0.457249	0.501637	0.787985	1.11925	1.03806	0.60057	0.581124
507	0.14841	0.146086	0.148638	0.144045	0.139823	0.396113	0.569006	0.535862	0.33281	0.308003	0.498803	0.826079	0.863402	0.474389	0.432279	0.700001	0.881066	0.862885	0.466405	0.511384	0.801158	1.13733	1.05524	0.612051	0.59215
507.2	0.151511	0.149256	0.151543	0.147053	0.142758	0.401736	0.577424	0.544242	0.338405	0.313216	0.506295	0.837364	0.875738	0.482075	0.439453	0.709348	0.892888	0.874511	0.473837	0.519274	0.811851	1.15241	1.06962	0.621394	0.6011
507.4	0.155338	0.152875	0.155243	0.150862	0.146468	0.409256	0.587076	0.554392	0.345672	0.319964	0.515934	0.852199	0.89076	0.49193	0.448533	0.721339	0.907723	0.888915	0.482921	0.529443	0.825322	1.17142	1.08744	0.633146	0.613015
507.6	0.158279	0.155828	0.158106	0.153977	0.149326	0.415389	0.595816	0.562347	0.351382	0.325403	0.523228	0.864271	0.903274	0.499831	0.455689	0.730926	0.91934	0.90032	0.490231	0.537445	0.836025	1.18709	1.10171	0.64274	0.622724
507.8	0.161428	0.158935	0.161187	0.157111	0.1524	0.421799	0.604377	0.57017	0.357095	0.33091	0.530734	0.875941	0.915407	0.507654	0.463045	0.74016	0.930897	0.912877	0.497321	0.545415	0.846885	1.20218	1.11623	0.652256	0.632077
508	0.165265	0.162951	0.165191	0.161233	0.156248	0.430199	0.614697	0.58069	0.364382	0.337906	0.539827	0.890309	0.931331	0.51751	0.472411	0.752088	0.945529	0.927916	0.506774	0.555464	0.861141	1.22037	1.13507	0.664432	0.643929
508.2	0.168478	0.166271	0.168372	0.164588	0.159419	0.43599	0.623579	0.588675	0.37017	0.343414	0.547216	0.902332	0.943446	0.525565	0.479717	0.76217	0.95717	0.940127	0.514403	0.563568	0.872393	1.23578	1.14935	0.674408	0.653377
508.4	0.172651	0.170346	0.172277	0.168722	0.163676	0.443631	0.634583	0.598948	0.377435	0.350586	0.556331	0.917404	0.959305	0.535872	0.488973	0.774915	0.972761	0.955155	0.524063	0.573684	0.88671	1.25522	1.16707	0.686861	0.665156
508.6	0.177828	0.17519	0.177369	0.173637	0.168422	0.453093	0.648216	0.611866	0.38649	0.359064	0.567724	0.935952	0.977316	0.548273	0.50033	0.789355	0.990815	0.973359	0.535469	0.586424	0.903054	1.27911	1.18871	0.701514	0.679596
508.8	0.180455	0.177876	0.180178	0.176199	0.170883	0.45787	0.654934	0.618033	0.391216	0.36328	0.573063	0.944543	0.987303	0.554561	0.506064	0.79675	0.999709	0.982157	0.541079	0.59285	0.91144	1.29049	1.20022	0.709236	0.68685
509	0.186103	0.18309	0.184954	0.181181	0.175757	0.467834	0.669176	0.630131	0.400006	0.371737	0.584771	0.963444	1.0064	0.56626	0.51779	0.81177	1.01905	0.999505	0.552585	0.605547	0.928995	1.31423	1.2219	0.724495	0.701361
509.2	0.188851	0.185702	0.187463	0.183789	0.178224	0.472517	0.675742	0.635792	0.404665	0.376213	0.590735	0.97257	1.01624	0.572493	0.52364	0.818723	1.02794	1.00846	0.55818	0.611867	0.93778	1.32672	1.23292	0.731985	0.708708
509.4	0.194253	0.19131	0.192636	0.189167	0.183178	0.481512	0.689586	0.648492	0.414285	0.385247	0.602477	0.990794	1.03588	0.585247	0.535377	0.833315	1.04461	1.02696	0.570398	0.624838	0.954708	1.34985	1.25512	0.746894	0.723358
509.6	0.196972	0.193855	0.19504	0.192023	0.185728	0.486544	0.6961	0.654929	0.418888	0.389728	0.607888	0.999651	1.04605	0.591334	0.541339	0.841005	1.05383	1.03531	0.576482	0.631163	0.963513	1.36217	1.26702	0.754459	0.730443
509.8	0.202516	0.198827	0.200533	0.197175	0.190956	0.495597	0.709204	0.66745	0.428347	0.399077	0.619778	1.01852	1.06596	0.604399	0.553469	0.855837	1.07325	1.05239	0.58871	0.644168	0.980471	1.38748	1.28887	0.769902	0.745313
510	0.205543	0.201325	0.203717	0.199806	0.193702	0.50077	0.715084	0.674086	0.433162	0.403691	0.625969	1.02775	1.0756	0.611002	0.559502	0.863757	1.08197	1.06099	0.594671	0.650918	0.989408	1.39985	1.29964	0.777486	0.752854
510.2	0.211233	0.206423	0.209276	0.205465	0.198978	0.510356	0.728567	0.687689	0.44282	0.413317	0.637362	1.04612	1.09612	0.623212	0.571499	0.879228	1.10043	1.07985	0.606951	0.664216	1.00674	1.42252	1.32264	0.792571	0.767983
510.4	0.214081	0.20909	0.211954	0.208277	0.201496	0.515638	0.735425	0.694512	0.447681	0.417948	0.643119	1.05572	1.10597	0.629703	0.577399	0.886926	1.10986	1.08855	0.613022	0.670638	1.0154	1.4351	1.33466	0.800475	0.775456
510.6	0.219976	0.214395	0.218025	0.213743	0.206832	0.525287	0.748454	0.707113	0.457306	0.427581	0.655315	1.07463	1.12552	0.642646	0.589316	0.902285	1.12827	1.1063	0.625479	0.683719	1.03269	1.45893	1.35645	0.81574	0.790326
510.8	0.223058	0.216774	0.220841	0.216702	0.209618	0.529965	0.756274	0.713991	0.462055	0.432268	0.66109	1.08336	1.13587	0.648921	0.595297	0.909971	1.13788	1.11608	0.631785	0.690303	1.04157	1.47104	1.36832	0.823588	0.797436
511	0.229111	0.222183	0.226806	0.222386	0.215293	0.539892	0.770693	0.729354	0.471818	0.44192	0.672966	1.10162	1.15571	0.661765	0.607735	0.924323	1.15696	1.13538	0.643983	0.703797	1.05838	1.49486	1.39098	0.838785	0.812002
511.2	0.23217	0.225108	0.229531	0.225276	0.218186	0.544566	0.77738	0.736677	0.476932	0.44659	0.67881	1.11092	1.16561	0.66815	0.614024	0.931715	1.16627	1.14421	0.650388	0.71032	1.0673	1.50642	1.40199	0.846816	0.819579
511.4	0.237954	0.230294	0.235653	0.231165	0.22376	0.553849	0.791391	0.750029	0.486863	0.456169	0.690102	1.13097	1.18583	0.681175	0.626467	0.946552	1.18678	1.16271	0.663177	0.72395	1.08481	1.53195	1.42368	0.862118	0.834737
511.6	0.240831	0.233209	0.238683	0.234358	0.22645	0.559309	0.798703	0.756888	0.491881	0.461045	0.696083	1.14	1.19626	0.687693	0.632538	0.954149	1.19618	1.17212	0.669203	0.730552	1.0938	1.5439	1.43529	0.86957	0.842506
511.8	0.246782	0.239324	0.244337	0.239902	0.231738	0.569217	0.811933	0.770202	0.501597	0.470612	0.70765	1.15807	1.21619	0.700836	0.645184	0.968129	1.21446	1.19076	0.681515	0.743845	1.11071	1.56744	1.45891	0.884745	0.857646
512	0.249519	0.242229	0.247479	0.242773	0.234717	0.574531	0.819174	0.776771	0.506435	0.47568	0.713451	1.16745	1.22724	0.707438	0.651355	0.975709	1.22414	1.20011	0.688048	0.750631	1.11941	1.57837	1.46963	0.89236	0.865147
512.2	0.255481	0.247979	0.253247	0.248621	0.240483	0.584205	0.83312	0.790615	0.516238	0.485831	0.724833	1.18708	1.24635	0.720376	0.663881	0.99013	1.24337	1.2185	0.700642	0.764038	1.13658	1.60358	1.49202	0.907607	0.880273
512.4	0.258587	0.250944	0.256061	0.251704	0.243517	0.588909	0.84002	0.797679	0.521424	0.490654	0.730671	1.19621	1.25682	0.727244	0.669966	0.997431	1.2521	1.22776	0.707271	0.770723	1.14433	1.61572	1.50299	0.915243	0.887981
512.6	0.264271	0.256992	0.262142	0.257912	0.24955	0.59836	0.853681	0.811423	0.53151	0.500367	0.741735	1.21388	1.2766	0.740498	0.682493	1.0119	1.27065	1.24571	0.720091	0.784164	1.16068	1.64004	1.52583	0.930744	0.902928
512.8	0.267268	0.259911	0.264925	0.260868	0.252475	0.603732	0.860801	0.81839	0.536064	0.505175	0.747562	1.22317	1.28656	0.746842	0.688728	1.01919	1.28085	1.25458	0.726204	0.790913	1.16887	1.65196	1.53811	0.938354	0.910448
513	0.273562	0.265931	0.270698	0.266652	0.258314	0.613963	0.874942	0.832049	0.546336	0.515309	0.759522	1.24196	1.30652	0.760161	0.701117	1.034	1.29948	1.27378	0.738788	0.804711	1.18586	1.67599	1.55962	0.953932	0.925829
513.2	0.276564	0.268935	0.273603	0.26964	0.261338	0.618821	0.882062	0.83899	0.551204	0.520008	0.765463	1.25108	1.31656	0.766891	0.707289	1.04123	1.30819	1.2841	0.745209	0.811366	1.19412	1.68673	1.57035	0.961236	0.933317
513.4	0.282551	0.275409	0.27988	0.275728	0.267221	0.628614	0.89781	0.851738	0.561006	0.529906	0.777042	1.26947	1.33596	0.779815	0.719708	1.05605	1.327	1.30239	0.757622	0.824452	1.21118	1.70952	1.59298	0.976711	0.948522
513.6	0.287929	0.280632	0.285125	0.280698	0.272279	0.636949	0.909648	0.862805	0.569335	0.537877	0.786814	1.28431	1.35207	0.791102	0.730357	1.06756	1.34161	1.3176	0.767927	0.835657	1.22542	1.72929	1.61052	0.989061	0.961026
513.8	0.291769	0.284892	0.289582	0.284805	0.276456	0.643315	0.918899	0.87183	0.576163	0.544355	0.794372	1.29659	1.36481	0.800035	0.73886	1.0769	1.35279	1.33067	0.776262	0.844771	1.23672	1.74412	1.62505	0.998887	0.97142
514	0.296861	0.289976	0.294677	0.290011	0.281465	0.651108	0.930366	0.882922	0.584626	0.552295	0.803231	1.31226	1.38064	0.810839	0.749443	1.08825	1.3676	1.34535	0.786188	0.855879	1.25008	1.76348	1.64257	1.01142	0.984139
514.2	0.300702	0.294053	0.298381	0.294184	0.285411	0.657615	0.939534	0.89181	0.59133	0.558835	0.810432	1.32474	1.39293	0.819715	0.758059	1.09742	1.37975	1.35646	0.794359	0.864776	1.26026	1.77838	1.65619	1.02172	0.994372
514.4	0.305893	0.299197	0.303548	0.299226	0.290507	0.66563	0.950443	0.902056	0.599571	0.566974	0.820166	1.33992	1.4093	0.830861	0.768393	1.10944	1.39516	1.37063	0.804845	0.875523	1.27442	1.79689	1.6745	1.03424	1.00695
514.6	0.309843	0.303536	0.307715	0.303286	0.294574	0.671946	0.958972	0.910315	0.606147	0.573762	0.827876	1.3515	1.4217	0.839474	0.776794	1.11858	1.40776	1.38217	0.813149	0.884421	1.28542	1.81172	1.68824	1.04416	1.01703
514.8	0.315303	0.308595	0.313066	0.308155	0.299648	0.68018	0.969796	0.921654	0.614268	0.582099	0.837538	1.36675	1.43806	0.850441	0.787316	1.12999	1.42147	1.3973	0.82308	0.895473	1.29822	1.82983	1.70574	1.05695	1.02928
515	0.319675	0.312695	0.317013	0.312021	0.303642	0.686428	0.978682	0.930431	0.620724	0.588718	0.845291	1.379	1.4504	0.859456	0.795582	1.13871	1.43263	1.40872	0.83144	0.904303	1.30806	1.84473	1.71886	1.06736	1.03925
515.2	0.324862	0.317847	0.322571	0.31743	0.30865	0.694171	0.988966	0.942028	0.629212	0.597197	0.854511	1.39344	1.46685	0.870359	0.805976	1.15029	1.44659	1.42245	0.841424	0.915151	1.3216	1.86369	1.73614	1.08002	1.05174
515.4	0.329006	0.322134	0.326805	0.321702	0.312737	0.700194	0.998035	0.951047	0.635999	0.60384	0.861806	1.40438	1.47908	0.8788	0.814223	1.15905	1.45788	1.43387	0.849508	0.923818	1.33226	1.87925	1.75015	1.09026	1.06173
515.6	0.334394	0.326941	0.332207	0.326898	0.317902	0.708547	1.00848	0.962376	0.644234	0.611959	0.872003	1.4184	1.49525	0.889249	0.824509	1.17077	1.47214	1.44829	0.859399	0.93452	1.34639	1.8971	1.76679	1.10298	1.07408
515.8	0.338551	0.330778	0.336846	0.33106	0.321942	0.714883	1.01706	0.971247	0.650987	0.618544	0.8796	1.43014	1.50748	0.89784	0.832807	1.17974	1.48418	1.45977	0.867234	0.943379	1.35756	1.91051	1.78078	1.11317	1.08379
516	0.342699	0.334662	0.341021	0.335152	0.325929	0.721145	1.02582	0.980057	0.657487	0.625039	0.887222	1.4414	1.51991	0.906561	0.84105	1.18865	1.49528	1.47088	0.875305	0.952085	1.36795	1.92483	1.79434	1.12325	1.09386
516.2	0.348072	0.339469	0.346653	0.340322	0.331068	0.728524	1.03706	0.990824	0.66605	0.633314	0.896202	1.45576	1.5359	0.917393	0.851547	1.1998	1.50861	1.48505	0.885606	0.962873	1.38128	1.94208	1.81018	1.13591	1.10622
516.4	0.35235	0.343351	0.351067	0.344513	0.335329	0.734695	1.04561	0.999531	0.672463	0.639903	0.903187	1.46759	1.54764	0.926115	0.859755	1.20889	1.51976	1.49551	0.893805	0.971451	1.39188	1.956	1.82472	1.14631	1.11605
516.6	0.357853	0.348216	0.356511	0.349732	0.340485	0.742332	1.05611	1.00981	0.680924	0.648532	0.912165	1.48237	1.5625	0.936563	0.869825	1.22067	1.53349	1.50808	0.903848	0.98203	1.40543	1.97536	1.84248	1.1591	1.12814
516.8	0.36199	0.352167	0.360783	0.35408	0.344757	0.748579	1.06423	1.01875	0.687483	0.655082	0.91891	1.49392	1.57484	0.9451	0.877892	1.22959	1.54448	1.51926	0.911856	0.990542	1.41535	1.98818	1.85601	1.16924	1.13799
517	0.366759	0.357132	0.365673	0.359663	0.35016	0.756322	1.07534	1.02927	0.695742	0.663254	0.927535	1.50962	1.58925	0.955522	0.887725	1.24106	1.55826	1.53337	0.921636	1.00105	1.42823	2.00461	1.87334	1.18201	1.15063
517.2	0.373777	0.36328	0.371924	0.365917	0.356409	0.765767	1.08801	1.04179	0.705334	0.673055	0.938101	1.52608	1.60763	0.968281	0.90011	1.25412	1.57536	1.54944	0.933773	1.01401	1.44295	2.026	1.89285	1.19711	1.16497
517.4	0.376848	0.366594	0.374752	0.368992	0.35959	0.770962	1.09471	1.04838	0.710319	0.678149	0.943471	1.53425	1.61617	0.97465	0.906423	1.26088	1.58389	1.55695	0.940081	1.02045	1.4505	2.03559	1.90308	1.20462	1.172
517.6	0.383283	0.372858	0.381334	0.3754	0.366086	0.77999	1.10819	1.06161	0.720146	0.687818	0.954618	1.55102	1.63474	0.987661	0.918347	1.27447	1.60064	1.57331	0.952247	1.03361	1.46626	2.05743	1.92385	1.21952	1.18636
517.8	0.386358	0.375838	0.384849	0.378759	0.369179	0.784775	1.11435	1.06801	0.724966	0.692804	0.95967	1.55917	1.644	0.994046	0.924315	1.28158	1.6083	1.58202	0.958464	1.0402	1.47389	2.06831	1.93313	1.22709	1.19333
518	0.393109	0.38193	0.390993	0.385204	0.375381	0.79468	1.12805	1.08063	0.735281	0.702362	0.970681	1.57714	1.6629	1.00691	0.935976	1.29547	1.62488	1.59845	0.970296	1.05311	1.48916	2.08978	1.9522	1.24256	1.20776
518.2	0.396327	0.385768	0.393681	0.388594	0.378631	0.798821	1.13496	1.08576	0.74009	0.707385	0.975708	1.58484	1.67056	1.01364	0.9419	1.30239	1.63383	1.6061	0.976116	1.05945	1.49666	2.10025	1.96206	1.25005	1.21513
518.4	0.403191	0.39251	0.400436	0.394824	0.385104	0.807959	1.14803	1.0991	0.750622	0.716973	0.985876	1.6007	1.68855	1.02587	0.954246	1.31601	1.64998	1.62326	0.987882	1.0718	1.51177	2.12085	1.98158	1.26436	1.22948
518.6	0.406766	0.395589	0.403624	0.398066	0.388407	0.812731	1.15528	1.1052	0.755371	0.721805	0.991416	1.60979	1.69647	1.03132	0.960313	1.3223	1.65871	1.63162	0.99409	1.07834	1.51879	2.1299	1.99128	1.27145	1.2368
518.8	0.413726	0.402027	0.409891	0.40467	0.394945	0.82169	1.16847	1.11786	0.765313	0.731516	1.00223	1.62715	1.71342	1.04334	0.972291	1.33594	1.67616	1.64871	1.00612	1.09098	1.53339	2.14851	2.0107	1.28588	1.25078
519	0.417151	0.405201	0.413544	0.408041	0.398169	0.826058	1.17487	1.12457	0.770295	0.736494	1.0068	1.63608	1.72157	1.05013	0.978496	1.34219	1.68437	1.65701	1.01199	1.09758	1.54038	2.15759	2.02046	1.29322	1.25801
519.2	0.423553	0.411609	0.419919	0.414623	0.40469	0.83534	1.1887	1.13743	0.780396	0.746468	1.01708	1.65376	1.73875	1.06311	0.990569	1.35544	1.70065	1.67309	1.02392	1.11028	1.55511	2.17814	2.03929	1.30717	1.27223
519.4	0.427218	0.414596	0.423408	0.417812	0.407901	0.840238	1.19569	1.14275	0.785679	0.751576	1.02217	1.66179	1.74621	1.06905	0.996483	1.36218	1.70839	1.68129	1.02994	1.11662	1.56271	2.18715	2.04812	1.31398	1.27917
519.6	0.433844	0.421549	0.429744	0.424595	0.414148	0.850057	1.2082	1.15607	0.795691	0.761483	1.03223	1.6782	1.76378	1.08172	1.00835	1.37502	1.72557	1.69834	1.04164	1.12919	1.57688	2.20844	2.06701	1.32777	1.29347
519.8	0.437387	0.425176	0.433364	0.427962	0.417209	0.855057	1.21438	1.16214	0.800797	0.766117	1.03724	1.68599	1.77309	1.08782	1.01478	1.38218	1.73391	1.70754	1.04757	1.13566	1.58401	2.21732	2.07632	1.33417	1.3004
520	0.444018	0.431316	0.440219	0.434656	0.42354	0.864598	1.22742	1.17523	0.810558	0.775587	1.04824	1.70096	1.79076	1.09988	1.02692	1.39446	1.7522	1.72557	1.05938	1.1483	1.59796	2.23562	2.09427	1.34821	1.31505
520.2	0.449732	0.436398	0.446026	0.440013	0.428931	0.872487	1.23784	1.18567	0.819284	0.783837	1.0572	1.71356	1.80468	1.11063	1.03708	1.40486	1.76544	1.7392	1.06938	1.15908	1.60977	2.25416	2.10977	1.35979	1.32656
520.4	0.454311	0.440438	0.450753	0.444322	0.433245	0.878796	1.24635	1.19439	0.826199	0.790439	1.06454	1.72336	1.81554	1.11899	1.04515	1.41291	1.77675	1.75069	1.07725	1.16765	1.61915	2.2682	2.12151	1.36901	1.33585
520.6	0.459816	0.445832	0.456085	0.449869	0.438754	0.886686	1.25718	1.20494	0.834617	0.798703	1.07352	1.73744	1.82938	1.12929	1.05547	1.4234	1.79032	1.76425	1.08748	1.17849	1.63189	2.28296	2.1382	1.38109	1.34752
520.8	0.464159	0.450256	0.460611	0.454523	0.443025	0.892931	1.26559	1.21369	0.841385	0.805228	1.08082	1.74811	1.84034	1.13788	1.06343	1.43188	1.80153	1.77566	1.09531	1.187	1.6413	2.29503	2.15106	1.39072	1.35678
521	0.470126	0.45562	0.46621	0.459794	0.448516	0.900803	1.27683	1.22418	0.849721	0.813526	1.08952	1.76184	1.85451	1.14825	1.07356	1.44276	1.81427	1.789	1.10481	1.19731	1.65297	2.31064	2.16677	1.40251	1.36892
521.2	0.474983	0.460524	0.470603	0.464175	0.45309	0.90689	1.2861	1.23327	0.856697	0.820125	1.09664	1.77274	1.86619	1.15612	1.08196	1.45105	1.82478	1.79968	1.11256	1.20574	1.66248	2.32239	2.1792	1.41188	1.37874
521.4	0.479702	0.464637	0.475164	0.468717	0.457506	0.912841	1.29517	1.24189	0.863273	0.826821	1.10352	1.78299	1.87721	1.16439	1.09023	1.4596	1.83541	1.81069	1.12034	1.21404	1.67192	2.33518	2.19272	1.42094	1.38783
521.6	0.48545	0.469763	0.480995	0.474413	0.463029	0.920901	1.30568	1.25405	0.871848	0.835071	1.11258	1.7961	1.89191	1.17484	1.10048	1.46981	1.84753	1.82355	1.1306	1.22485	1.68394	2.35108	2.20865	1.43227	1.39947
521.8	0.490297	0.474013	0.485737	0.479255	0.467501	0.927378	1.31452	1.26254	0.878479	0.841713	1.11949	1.80744	1.90334	1.18356	1.10852	1.47861	1.85876	1.83423	1.13904	1.23349	1.6942	2.36392	2.22117	1.44155	1.40911
522	0.495978	0.479192	0.491492	0.485037	0.473155	0.935265	1.32601	1.27395	0.887049	0.85	1.12806	1.82068	1.918	1.19465	1.11861	1.48918	1.8723	1.84801	1.14928	1.24394	1.70716	2.38113	2.23699	1.45302	1.42089
522.2	0.500409	0.483229	0.496265	0.489371	0.477537	0.941836	1.33442	1.28285	0.893742	0.856845	1.13487	1.8317	1.93043	1.20365	1.12701	1.49783	1.88293	1.85809	1.15746	1.25279	1.71718	2.39448	2.2486	1.46256	1.43028
522.4	0.506216	0.488585	0.501892	0.49475	0.483043	0.950042	1.34517	1.29326	0.902511	0.865491	1.14373	1.84561	1.94656	1.21461	1.13729	1.50874	1.8963	1.87051	1.16794	1.26344	1.72909	2.41119	2.26462	1.47395	1.44198
522.6	0.511131	0.49324	0.506406	0.499378	0.487532	0.95656	1.35413	1.30162	0.909171	0.872408	1.15083	1.85591	1.95914	1.223	1.14556	1.51764	1.90623	1.88145	1.17623	1.27205	1.73861	2.42487	2.27737	1.48341	1.45183
522.8	0.516783	0.499368	0.512381	0.505188	0.493342	0.964811	1.36496	1.31292	0.917448	0.881213	1.15942	1.86977	1.9753	1.23404	1.15603	1.52844	1.92007	1.89535	1.1863	1.28309	1.7503	2.44237	2.29346	1.4951	1.46407
523	0.524157	0.506261	0.519498	0.512189	0.500403	0.974282	1.37898	1.32663	0.927817	0.891598	1.17034	1.88661	1.99342	1.24713	1.16877	1.54161	1.93628	1.91171	1.19908	1.29645	1.76609	2.46168	2.31152	1.50957	1.47867
523.2	0.527814	0.509451	0.52296	0.515676	0.503925	0.978716	1.38542	1.33377	0.933003	0.896734	1.17559	1.89552	2.00193	1.25384	1.17499	1.54733	1.94477	1.92001	1.20495	1.30289	1.77324	2.47203	2.32021	1.51717	1.48567
523.4	0.535024	0.516641	0.529776	0.522494	0.511374	0.988262	1.39958	1.34765	0.944084	0.907275	1.18621	1.91397	2.02085	1.26739	1.18792	1.56085	1.96108	1.9353	1.2172	1.31629	1.78844	2.49251	2.34047	1.53231	1.50016
523.6	0.538725	0.52059	0.53314	0.52603	0.514786	0.993641	1.40632	1.35514	0.949375	0.91246	1.19117	1.92318	2.03024	1.27353	1.19458	1.56699	1.96957	1.94371	1.22366	1.32256	1.79646	2.50213	2.35052	1.53982	1.50777
523.8	0.546114	0.528077	0.539427	0.533355	0.521765	1.00291	1.42022	1.36886	0.960358	0.923111	1.20095	1.94081	2.04892	1.2873	1.20787	1.58053	1.98624	1.95903	1.23625	1.3353	1.81171	2.52099	2.37044	1.55427	1.52252
524	0.549792	0.531479	0.54279	0.536881	0.525338	1.00747	1.42639	1.37502	0.965613	0.92863	1.20608	1.94945	2.05874	1.29413	1.2142	1.58744	1.99468	1.96734	1.24235	1.3419	1.81883	2.53189	2.37897	1.56166	1.52994
524.2	0.557114	0.538276	0.549768	0.543706	0.532462	1.01819	1.44131	1.38757	0.976143	0.939685	1.21599	1.966	2.07797	1.30752	1.22716	1.60177	2.0119	1.98397	1.25501	1.35488	1.83369	2.55492	2.39716	1.57673	1.54498
524.4	0.560644	0.542127	0.553651	0.547597	0.53613	1.02316	1.44739	1.39536	0.981838	0.945063	1.22168	1.97485	2.08761	1.31457	1.23366	1.60826	2.02078	1.99231	1.26145	1.36187	1.84165	2.56569	2.4071	1.58432	1.55241
524.6	0.567388	0.549335	0.560885	0.555109	0.543141	1.03321	1.46153	1.40886	0.992937	0.956134	1.23253	1.9922	2.10518	1.3282	1.24665	1.62055	2.0387	2.01024	1.27429	1.37524	1.85701	2.58668	2.42684	1.59932	1.56757
524.8	0.570828	0.553368	0.564951	0.558897	0.546888	1.03853	1.46838	1.4162	0.998246	0.961622	1.23759	2.0019	2.1153	1.33494	1.25296	1.62742	2.04657	2.01874	1.28094	1.38214	1.8645	2.59688	2.43717	1.60664	1.57532
525	0.578717	0.560397	0.57268	0.565938	0.554201	1.04855	1.48278	1.42946	1.00954	0.972636	1.24818	2.0198	2.13427	1.3487	1.2662	1.64181	2.0659	2.03567	1.29433	1.39594	1.87953	2.61672	2.45619	1.62136	1.5907
525.2	0.582336	0.563614	0.575953	0.5694	0.557676	1.05356	1.49028	1.43645	1.01509	0.978536	1.25359	2.02967	2.14365	1.35558	1.27296	1.64879	2.07423	2.0428	1.30029	1.40323	1.88741	2.62816	2.46698	1.62896	1.5982
525.4	0.589082	0.5711	0.583125	0.576819	0.564866	1.06357	1.50364	1.45011	1.02626	0.98966	1.2651	2.0462	2.16208	1.36954	1.28659	1.66284	2.09095	2.05942	1.3131	1.41727	1.90269	2.64869	2.48553	1.64422	1.61337
525.6	0.595575	0.577486	0.589404	0.583351	0.571274	1.07228	1.51621	1.46219	1.03521	0.998507	1.27506	2.06113	2.17578	1.38122	1.29763	1.6748	2.10533	2.07407	1.32371	1.42905	1.9159	2.66673	2.50259	1.65695	1.62653
525.8	0.600894	0.58256	0.594771	0.588704	0.576273	1.079	1.5265	1.47171	1.04241	1.00566	1.28234	2.07282	2.1878	1.39024	1.30664	1.68423	2.11642	2.0863	1.33279	1.43863	1.92599	2.68118	2.51636	1.66752	1.637
526	0.607388	0.588563	0.600512	0.594884	0.582527	1.08755	1.53808	1.48377	1.05191	1.01482	1.29209	2.08743	2.20151	1.40164	1.31759	1.6954	2.13095	2.09903	1.34367	1.45002	1.93884	2.69878	2.5317	1.68101	1.64964
526.2	0.612296	0.593573	0.605277	0.599669	0.587539	1.09438	1.54774	1.49361	1.05965	1.02195	1.29972	2.09866	2.21338	1.4108	1.32674	1.70439	2.14325	2.10961	1.35219	1.45921	1.94882	2.7133	2.54414	1.69156	1.65953
526.4	0.617336	0.598479	0.610188	0.604777	0.592605	1.10142	1.55727	1.50259	1.06709	1.02937	1.30674	2.11056	2.22519	1.42014	1.33574	1.71377	2.15498	2.12079	1.36094	1.46833	1.95844	2.72761	2.55848	1.70207	1.66971
526.6	0.623817	0.604821	0.616779	0.611018	0.598889	1.10984	1.56957	1.51431	1.07631	1.03872	1.31623	2.12562	2.24115	1.4322	1.34664	1.72519	2.16936	2.13472	1.37227	1.47958	1.97106	2.74654	2.57637	1.71458	1.68282
526.8	0.628628	0.610091	0.621558	0.6161	0.603639	1.11655	1.5787	1.52382	1.08366	1.04611	1.32338	2.13684	2.25283	1.4413	1.35558	1.73414	2.17935	2.14643	1.3812	1.48897	1.98124	2.76118	2.58896	1.72456	1.69284
527	0.634735	0.616475	0.627901	0.622543	0.609909	1.12459	1.59047	1.53535	1.09268	1.05517	1.33293	2.15153	2.26855	1.4527	1.36639	1.74536	2.19396	2.16081	1.3922	1.50068	1.99362	2.77926	2.60465	1.7371	1.70513
527.2	0.639834	0.621821	0.632993	0.627509	0.61485	1.13171	1.60019	1.54456	1.09968	1.06244	1.3407	2.16321	2.28119	1.4614	1.37507	1.75426	2.206	2.17222	1.40111	1.51001	2.00375	2.79347	2.61744	1.74718	1.71534
527.4	0.645885	0.628299	0.63952	0.633756	0.621115	1.14065	1.61257	1.55695	1.10887	1.07167	1.35044	2.17681	2.29604	1.47266	1.38591	1.76589	2.22073	2.18667	1.4122	1.52165	2.01729	2.8112	2.63369	1.75928	1.72796
527.6	0.65089	0.633638	0.645166	0.638786	0.626199	1.14673	1.62164	1.56577	1.11634	1.0789	1.35801	2.18965	2.30818	1.48188	1.39474	1.77509	2.23207	2.19765	1.42074	1.53085	2.02758	2.82521	2.64683	1.76934	1.73805
527.8	0.657357	0.64037	0.651394	0.644943	0.632355	1.15536	1.63355	1.57654	1.12533	1.08807	1.36656	2.20406	2.32316	1.49256	1.40596	1.78618	2.24578	2.21179	1.43131	1.54225	2.03992	2.84119	2.66342	1.78183	1.75049
528	0.665514	0.648126	0.659058	0.652212	0.639983	1.16521	1.64573	1.59005	1.13657	1.09922	1.37736	2.22061	2.34244	1.50628	1.41949	1.80006	2.26263	2.22742	1.44399	1.55627	2.05551	2.86229	2.68196	1.79649	1.76488
528.2	0.669138	0.65161	0.662718	0.656125	0.643588	1.17019	1.65331	1.59734	1.14183	1.1045	1.38319	2.22794	2.35152	1.51312	1.42618	1.80649	2.27136	2.2365	1.45078	1.56297	2.06273	2.87307	2.69111	1.80408	1.77267
528.4	0.67599	0.658899	0.670198	0.663874	0.651265	1.18023	1.66774	1.6112	1.15266	1.11527	1.3942	2.246	2.36957	1.52602	1.43937	1.81941	2.28678	2.25245	1.46356	1.57675	2.0778	2.89487	2.7108	1.819	1.78734
528.6	0.679146	0.663119	0.673897	0.667642	0.655309	1.18556	1.67379	1.61846	1.15813	1.12035	1.39939	2.25351	2.37908	1.53234	1.44582	1.82584	2.29476	2.26137	1.47016	1.58349	2.08456	2.9047	2.72024	1.82641	1.79453
528.8	0.687366	0.671174	0.681174	0.674906	0.662979	1.1953	1.68797	1.63178	1.16857	1.13102	1.40958	2.27186	2.39653	1.54545	1.45913	1.83832	2.31275	2.27725	1.48255	1.59656	2.09791	2.92452	2.73944	1.84198	1.8094
529	0.691169	0.675144	0.684382	0.678923	0.666674	1.19998	1.69514	1.63759	1.17421	1.13657	1.41441	2.27924	2.40582	1.55176	1.46554	1.84455	2.3208	2.28614	1.489	1.6031	2.10432	2.93541	2.74877	1.84938	1.81659
529.2	0.697796	0.682433	0.691433	0.685829	0.674103	1.20923	1.70832	1.65103	1.18502	1.14751	1.42471	2.29525	2.42275	1.56427	1.47808	1.85662	2.33819	2.30213	1.50079	1.61598	2.11946	2.95468	2.76715	1.86391	1.83094
529.4	0.701433	0.68649	0.695445	0.689668	0.677837	1.21396	1.71454	1.6576	1.1902	1.15293	1.42921	2.3039	2.43259	1.57087	1.48465	1.86274	2.34724	2.31101	1.50693	1.62282	2.12668	2.96472	2.77642	1.87091	1.8378
529.6	0.708386	0.694125	0.703216	0.696862	0.685263	1.22301	1.72771	1.67133	1.201	1.16372	1.43927	2.32123	2.44967	1.58371	1.49672	1.87662	2.36241	2.32826	1.51976	1.63577	2.1414	2.983	2.79525	1.885	1.85277
529.8	0.711695	0.697545	0.707592	0.70039	0.688887	1.22766	1.73344	1.6782	1.20588	1.16912	1.44413	2.32897	2.45849	1.59012	1.50278	1.88207	2.37031	2.33634	1.5258	1.64221	2.14841	2.99241	2.80309	1.89246	1.85988
530	0.718784	0.704616	0.714477	0.707643	0.696141	1.23661	1.7474	1.69089	1.2166	1.17957	1.45443	2.34426	2.47439	1.60249	1.51516	1.89521	2.38715	2.35132	1.53767	1.65526	2.16184	3.01157	2.81935	1.90628	1.87386
530.2	0.723721	0.709507	0.719858	0.712738	0.701313	1.2429	1.75692	1.69833	1.22313	1.18631	1.46081	2.35495	2.48524	1.61041	1.5231	1.90335	2.39764	2.36126	1.54592	1.66374	2.17097	3.02324	2.83094	1.91548	1.88343
530.4	0.729835	0.714999	0.725566	0.718495	0.70754	1.2507	1.768	1.70875	1.23149	1.19498	1.46845	2.36713	2.49755	1.62053	1.5333	1.91401	2.41031	2.3736	1.55594	1.67456	2.18183	3.03835	2.84549	1.92642	1.89515
530.6	0.734443	0.719405	0.730255	0.723146	0.712254	1.25685	1.77557	1.71757	1.23832	1.20187	1.47483	2.37686	2.5083	1.62885	1.54143	1.92206	2.41962	2.38334	1.56358	1.68295	2.19027	3.05112	2.85682	1.93554	1.90413
530.8	0.740174	0.725179	0.736181	0.729032	0.717974	1.26422	1.78593	1.72854	1.24678	1.21019	1.48234	2.3897	2.52206	1.63892	1.5516	1.931	2.43178	2.39519	1.57325	1.69308	2.20015	3.06725	2.87197	1.94721	1.91553
531	0.745085	0.729647	0.740236	0.733865	0.722796	1.27062	1.79433	1.73851	1.25343	1.21693	1.48842	2.39891	2.53305	1.64694	1.55988	1.93854	2.44111	2.40576	1.58111	1.70177	2.20921	3.07881	2.88242	1.95623	1.92497
531.2	0.751014	0.735337	0.745833	0.739738	0.728763	1.27799	1.8037	1.74929	1.26175	1.22541	1.49681	2.41126	2.54579	1.65754	1.56982	1.94834	2.45333	2.4183	1.59085	1.71201	2.22061	3.09365	2.8955	1.96713	1.93643
531.4	0.755726	0.739944	0.750392	0.744496	0.733572	1.28388	1.81281	1.75687	1.268	1.23183	1.50282	2.42119	2.55636	1.66524	1.57728	1.95585	2.46264	2.42755	1.59842	1.7199	2.22841	3.10476	2.90744	1.97611	1.94538
531.6	0.762089	0.745536	0.755901	0.750299	0.739583	1.29044	1.82319	1.76594	1.27582	1.23987	1.51034	2.43304	2.56846	1.67464	1.58662	1.9649	2.47499	2.43816	1.60728	1.7298	2.23831	3.11823	2.92058	1.98711	1.95585
531.8	0.768944	0.752515	0.762577	0.757184	0.746369	1.29839	1.8341	1.77754	1.28503	1.24976	1.51901	2.44595	2.58287	1.68613	1.59836	1.97608	2.4885	2.45285	1.61813	1.74114	2.2504	3.13491	2.93591	2.0002	1.9689
532	0.77257	0.756057	0.76554	0.760642	0.749875	1.30239	1.84055	1.78343	1.28952	1.25499	1.5232	2.45382	2.58953	1.6918	1.60398	1.98182	2.49669	2.45954	1.62345	1.74673	2.25673	3.14275	2.94354	2.00642	1.97526
532.2	0.778987	0.761539	0.772213	0.767415	0.756552	1.31099	1.85208	1.79448	1.29893	1.26485	1.53103	2.46554	2.60295	1.70251	1.61486	1.99243	2.50872	2.47316	1.63498	1.7586	2.26867	3.15945	2.95855	2.01777	1.98769
532.4	0.782133	0.764827	0.775791	0.770408	0.75955	1.31506	1.8577	1.80101	1.30359	1.26966	1.53526	2.47251	2.61036	1.70846	1.62073	1.99741	2.51511	2.47971	1.64065	1.76444	2.27417	3.16714	2.96634	2.02406	1.99394
532.6	0.788658	0.771388	0.782283	0.777337	0.766128	1.32314	1.86842	1.8109	1.31354	1.27872	1.54391	2.48616	2.62519	1.71947	1.63214	2.00815	2.52811	2.49188	1.65107	1.77553	2.28471	3.18289	2.98068	2.0362	2.00659
532.8	0.791635	0.774439	0.785425	0.780398	0.769414	1.32697	1.87469	1.81597	1.31834	1.28334	1.54796	2.49109	2.63193	1.72496	1.63739	2.01266	2.53529	2.49922	1.65601	1.78118	2.2901	3.1914	2.9889	2.04193	2.01276
533	0.798126	0.780948	0.791418	0.787195	0.775941	1.3342	1.88614	1.82561	1.3264	1.29218	1.55587	2.50257	2.64639	1.73518	1.64807	2.02178	2.54823	2.512	1.66568	1.79202	2.30012	3.2052	3.00107	2.05338	2.02443
533.2	0.80166	0.783791	0.79388	0.790201	0.779138	1.33814	1.89191	1.83015	1.33081	1.29654	1.56019	2.50857	2.65317	1.74056	1.65349	2.0269	2.55453	2.51854	1.67045	1.79693	2.30521	3.21208	3.00796	2.05877	2.03007
533.4	0.807667	0.791014	0.800152	0.796649	0.785848	1.34622	1.90187	1.83991	1.33896	1.30508	1.56767	2.52129	2.66569	1.74988	1.66392	2.03569	2.56551	2.53015	1.6799	1.80738	2.31557	3.22761	3.02352	2.07025	2.04142
533.6	0.81097	0.794088	0.803047	0.799777	0.788886	1.35033	1.90699	1.84506	1.34337	1.30938	1.57142	2.52575	2.67245	1.7548	1.66929	2.04065	2.57157	2.53661	1.68434	1.81238	2.32092	3.23427	3.03151	2.07572	2.04686
533.8	0.817474	0.800923	0.810262	0.806041	0.795175	1.35792	1.91673	1.85478	1.35282	1.31822	1.57921	2.53736	2.68512	1.76543	1.6792	2.04968	2.58309	2.54867	1.69293	1.82257	2.33041	3.2485	3.04415	2.08703	2.05837
534	0.821533	0.805105	0.814816	0.810294	0.799596	1.36258	1.92321	1.86068	1.35811	1.32394	1.58419	2.54558	2.69405	1.77162	1.68585	2.0556	2.59163	2.55606	1.69927	1.82945	2.33672	3.25612	3.0529	2.09404	2.06542
534.2	0.826811	0.809743	0.819531	0.815751	0.804991	1.36825	1.93083	1.86785	1.36446	1.33112	1.59024	2.55509	2.70433	1.77913	1.69396	2.06352	2.60202	2.56626	1.70725	1.83795	2.34478	3.26564	3.06288	2.10216	2.07481
534.4	0.830632	0.814022	0.823729	0.819417	0.808928	1.37204	1.9379	1.87351	1.37014	1.33627	1.59499	2.5624	2.71137	1.78511	1.69975	2.06852	2.60963	2.57263	1.71293	1.844	2.35046	3.27356	3.07212	2.10851	2.08132
534.6	0.83541	0.818727	0.829283	0.824127	0.813976	1.37696	1.94708	1.88115	1.37689	1.34306	1.60023	2.57034	2.72029	1.79252	1.70715	2.07488	2.61972	2.58083	1.72015	1.85203	2.35703	3.28382	3.08242	2.11637	2.08939
534.8	0.839165	0.82264	0.833329	0.827911	0.817685	1.38127	1.95381	1.88815	1.38202	1.34834	1.60509	2.57764	2.72715	1.79824	1.71347	2.08062	2.62618	2.58686	1.72609	1.85831	2.36268	3.29351	3.08991	2.12282	2.09611
535	0.843471	0.827691	0.838103	0.832548	0.822551	1.3873	1.96234	1.89599	1.38849	1.35499	1.61078	2.58675	2.73563	1.80526	1.72123	2.08761	2.63403	2.59467	1.73324	1.86609	2.3697	3.30488	3.10015	2.13062	2.1046
535.2	0.847522	0.831861	0.841485	0.836324	0.826606	1.39193	1.96891	1.90241	1.39337	1.36025	1.61468	2.59349	2.74239	1.81109	1.72709	2.0919	2.64081	2.60117	1.73867	1.87195	2.37504	3.31254	3.10687	2.13724	2.11088
535.4	0.852729	0.8367	0.846362	0.841097	0.831519	1.39695	1.97646	1.90927	1.39956	1.3665	1.62054	2.60098	2.75145	1.81854	1.73436	2.09828	2.6479	2.60896	1.74537	1.87915	2.38151	3.3225	3.1148	2.14542	2.11889
535.6	0.858345	0.843229	0.851689	0.846637	0.837442	1.4021	1.98477	1.91794	1.40741	1.37325	1.62667	2.61037	2.7634	1.82791	1.74313	2.10562	2.65752	2.61755	1.75314	1.88728	2.38863	3.33263	3.12431	2.15474	2.12817
535.8	0.860911	0.845627	0.854835	0.849558	0.840647	1.40554	1.98875	1.92202	1.41104	1.37672	1.62915	2.61694	2.76823	1.8315	1.74704	2.10933	2.66299	2.62065	1.75669	1.89119	2.39305	3.33703	3.1286	2.15848	2.13261
536	0.866556	0.851265	0.860866	0.854956	0.846219	1.41102	1.99693	1.93056	1.41738	1.38374	1.63388	2.625	2.77687	1.8398	1.75464	2.11646	2.67162	2.62966	1.76471	1.8991	2.39979	3.34675	3.13698	2.16692	2.14113
536.2	0.86909	0.854202	0.863583	0.857699	0.848868	1.41378	2.00029	1.93449	1.42092	1.38699	1.63676	2.629	2.7816	1.84372	1.75899	2.12023	2.67581	2.63242	1.76846	1.9029	2.40359	3.35117	3.14217	2.17107	2.14569
536.4	0.874126	0.859302	0.86897	0.862841	0.854126	1.41944	2.00768	1.94263	1.4281	1.39391	1.64164	2.63832	2.7893	1.85114	1.76692	2.12698	2.68399	2.64051	1.77621	1.91084	2.41139	3.36119	3.15288	2.17946	2.1541
536.6	0.876232	0.862657	0.871644	0.865337	0.856977	1.42217	2.01138	1.94693	1.43175	1.39712	1.64328	2.64312	2.79352	1.85484	1.77074	2.12996	2.68846	2.64482	1.77966	1.91483	2.41556	3.36594	3.15779	2.18364	2.1584
536.8	0.881563	0.86703	0.876736	0.870032	0.86195	1.42721	2.01997	1.95497	1.43853	1.40401	1.64861	2.65234	2.80207	1.86243	1.77838	2.13576	2.69659	2.653	1.78739	1.92205	2.42221	3.37233	3.16494	2.19051	2.16684
537	0.883171	0.869348	0.879276	0.87213	0.864446	1.42905	2.02447	1.9593	1.44172	1.40707	1.65117	2.65799	2.80539	1.86595	1.78193	2.13805	2.70075	2.65534	1.7913	1.92536	2.42525	3.37728	3.16854	2.19425	2.17083
537.2	0.887152	0.873548	0.883405	0.876966	0.86922	1.43363	2.03046	1.96826	1.44692	1.41311	1.6554	2.6664	2.81404	1.87246	1.78946	2.14289	2.70795	2.66159	1.79869	1.93261	2.43157	3.38299	3.17647	2.2016	2.1778
537.4	0.89026	0.877227	0.886512	0.880121	0.872625	1.43648	2.03626	1.97343	1.45136	1.41713	1.6583	2.67066	2.81856	1.87728	1.7939	2.14652	2.71174	2.6662	1.80304	1.93715	2.43656	3.38987	3.18182	2.20636	2.18316
537.6	0.894135	0.882443	0.890679	0.883784	0.876756	1.44003	2.04296	1.97985	1.45648	1.42194	1.66243	2.67681	2.82487	1.88353	1.79936	2.15108	2.7168	2.67159	1.80774	1.94224	2.44148	3.39664	3.18795	2.21251	2.18926
537.8	0.897055	0.885418	0.894049	0.886972	0.87987	1.4432	2.04657	1.98456	1.46003	1.42573	1.66482	2.6818	2.83052	1.88793	1.80371	2.15492	2.72101	2.67612	1.81227	1.94628	2.44475	3.40153	3.19254	2.21695	2.19413
538	0.900848	0.889317	0.897738	0.890757	0.883895	1.44696	2.0508	1.99038	1.46493	1.43037	1.66792	2.68767	2.83738	1.89305	1.80933	2.15937	2.72481	2.68152	1.81801	1.95104	2.44957	3.4072	3.19682	2.22243	2.20028
538.2	0.903655	0.891521	0.900295	0.89379	0.887101	1.44959	2.05431	1.99367	1.46875	1.43408	1.67002	2.6915	2.84143	1.89742	1.81349	2.16193	2.72964	2.68595	1.82188	1.95532	2.45351	3.41057	3.20059	2.22668	2.20461
538.4	0.906934	0.894815	0.904154	0.897576	0.89093	1.45264	2.05907	1.99822	1.47334	1.43859	1.67315	2.69749	2.8475	1.90296	1.81851	2.16591	2.7355	2.69162	1.82695	1.96063	2.45788	3.41468	3.20492	2.232	2.20979
538.6	0.909358	0.897473	0.907222	0.90033	0.893778	1.4551	2.06332	2.00151	1.4768	1.44169	1.67583	2.70148	2.85098	1.90657	1.82208	2.16932	2.73866	2.69505	1.83074	1.96465	2.46183	3.41848	3.20963	2.23581	2.21427
538.8	0.911634	0.901006	0.910555	0.903634	0.897167	1.45877	2.0677	2.00585	1.48075	1.44605	1.67813	2.70552	2.8556	1.91099	1.82689	2.17253	2.74288	2.69911	1.83602	1.96968	2.46624	3.42237	3.21541	2.24054	2.21974
539	0.91544	0.905251	0.915125	0.907646	0.901299	1.46265	2.07443	2.01156	1.48467	1.45148	1.68105	2.71122	2.86039	1.91548	1.83298	2.17604	2.74833	2.70504	1.84081	1.97533	2.47104	3.42876	3.22143	2.24609	2.22568
539.2	0.917109	0.907402	0.916687	0.909416	0.90324	1.46376	2.07674	2.0134	1.48683	1.45403	1.68272	2.7124	2.86428	1.91796	1.83583	2.17771	2.75058	2.70821	1.84339	1.97782	2.47285	3.43262	3.22353	2.24863	2.22914
539.4	0.920731	0.912303	0.920382	0.913242	0.907079	1.46721	2.08178	2.01869	1.49149	1.45914	1.6864	2.71748	2.86984	1.92317	1.84189	2.18071	2.75539	2.71173	1.84796	1.9835	2.47788	3.43749	3.22837	2.25418	2.23463
539.6	0.92309	0.91407	0.92195	0.915507	0.909119	1.46936	2.08458	2.02175	1.49364	1.46136	1.68765	2.72179	2.87184	1.92497	1.84418	2.18293	2.75673	2.7144	1.85076	1.98593	2.47962	3.44014	3.22939	2.25712	2.23735
539.8	0.9266	0.91831	0.925555	0.918724	0.913125	1.47284	2.08903	2.02622	1.49774	1.46573	1.69051	2.7262	2.87591	1.92978	1.84936	2.18559	2.76091	2.7183	1.85505	1.99082	2.48252	3.44513	3.23354	2.26194	2.2425
540	0.928509	0.920126	0.927444	0.920703	0.914917	1.47492	2.09176	2.02863	1.49976	1.468	1.69233	2.72853	2.87834	1.93215	1.85163	2.18817	2.76112	2.71958	1.85739	1.99316	2.48374	3.44678	3.23506	2.26408	2.24507
540.2	0.93194	0.924686	0.930359	0.924508	0.918788	1.47705	2.09517	2.03278	1.50371	1.47246	1.69474	2.7322	2.88251	1.93593	1.85658	2.19128	2.7651	2.72203	1.86167	1.99845	2.48688	3.44979	3.24109	2.26882	2.24979
540.4	0.934754	0.927649	0.932389	0.927098	0.921384	1.47887	2.09782	2.03509	1.50649	1.4756	1.697	2.73334	2.88522	1.93882	1.8596	2.19301	2.76848	2.72426	1.86423	2.002	2.48919	3.45206	3.24259	2.27136	2.25347
540.6	0.937738	0.930476	0.935137	0.930241	0.924618	1.48141	2.10169	2.03832	1.50994	1.47896	1.69895	2.73584	2.88757	1.94268	1.8634	2.19461	2.77222	2.72743	1.86725	2.00578	2.4911	3.45595	3.24587	2.27516	2.25795
540.8	0.940074	0.932312	0.937762	0.932411	0.92676	1.48352	2.10367	2.04071	1.51186	1.48168	1.70015	2.73878	2.88964	1.94524	1.86648	2.1955	2.77494	2.72863	1.87019	2.00894	2.49221	3.45769	3.24739	2.27775	2.26068
541	0.942728	0.934342	0.941266	0.935275	0.929656	1.48534	2.10624	2.04408	1.51506	1.4851	1.70122	2.7411	2.89144	1.9485	1.87016	2.19654	2.77659	2.7309	1.87412	2.01294	2.49387	3.45909	3.24924	2.28068	2.26351
541.2	0.944735	0.936485	0.943319	0.937678	0.932023	1.48691	2.10843	2.04623	1.51751	1.48795	1.70265	2.74224	2.89254	1.95085	1.87344	2.19765	2.77871	2.73268	1.8765	2.01607	2.49542	3.46071	3.25062	2.28247	2.26615
541.4	0.947133	0.93938	0.945478	0.940652	0.934779	1.48859	2.112	2.04856	1.52028	1.49113	1.70414	2.7444	2.89483	1.95373	1.87684	2.19893	2.78219	2.73521	1.87939	2.02001	2.49808	3.46368	3.25389	2.28501	2.26972
541.6	0.949175	0.941878	0.948122	0.942614	0.936813	1.49039	2.11367	2.05145	1.52216	1.49366	1.70507	2.74642	2.89552	1.95599	1.87945	2.20064	2.78409	2.73697	1.88166	2.022	2.49828	3.46449	3.25448	2.28676	2.27272
541.8	0.951958	0.945021	0.950709	0.944891	0.939288	1.49244	2.1154	2.0553	1.5249	1.49662	1.70558	2.7479	2.89683	1.95829	1.88297	2.20252	2.78543	2.73889	1.88492	2.02451	2.49874	3.4661	3.256	2.28871	2.27629
542	0.954379	0.947775	0.954537	0.947858	0.942265	1.49509	2.11848	2.0578	1.52768	1.50073	1.70782	2.7508	2.90115	1.96176	1.88694	2.20386	2.78843	2.74062	1.88817	2.02745	2.49905	3.46799	3.25556	2.29156	2.27955
542.2	0.956301	0.949456	0.95658	0.949548	0.943915	1.49584	2.1209	2.05945	1.52926	1.50195	1.70872	2.75252	2.90153	1.96353	1.8885	2.20383	2.78941	2.74154	1.88961	2.02904	2.49957	3.46871	3.25559	2.29287	2.28126
542.4	0.958805	0.952734	0.959231	0.952582	0.946937	1.49832	2.12295	2.06125	1.53232	1.50531	1.71035	2.75574	2.90346	1.96671	1.89133	2.20492	2.79207	2.74296	1.89264	2.0322	2.50033	3.46971	3.25515	2.29481	2.28416
542.6	0.960515	0.954268	0.960799	0.954039	0.948482	1.49971	2.12484	2.06376	1.53397	1.50711	1.71037	2.75672	2.90309	1.9682	1.89298	2.20596	2.79264	2.7426	1.89435	2.03376	2.50002	3.4694	3.25536	2.29611	2.28519
542.8	0.963564	0.956425	0.963591	0.95679	0.951682	1.50121	2.12605	2.06738	1.53649	1.51033	1.7112	2.75735	2.9049	1.97012	1.89581	2.20692	2.79328	2.74484	1.89755	2.03654	2.50045	3.46962	3.2572	2.29774	2.2885
543	0.964641	0.957799	0.964865	0.957837	0.953044	1.50129	2.12718	2.06857	1.53815	1.51225	1.71199	2.75711	2.90576	1.97182	1.89757	2.20714	2.79498	2.74426	1.89891	2.0381	2.50049	3.46972	3.25786	2.2985	2.29005
543.2	0.967213	0.960898	0.967219	0.961079	0.95582	1.50241	2.1309	2.07163	1.54082	1.51564	1.71242	2.75729	2.90684	1.97442	1.90047	2.20722	2.79614	2.74352	1.90183	2.04047	2.50111	3.47007	3.2583	2.30016	2.29274
543.4	0.968624	0.962249	0.968979	0.963192	0.957523	1.50297	2.13237	2.07287	1.54188	1.5176	1.71265	2.75671	2.90639	1.97592	1.90203	2.20682	2.79736	2.74391	1.90327	2.04239	2.50137	3.47133	3.25796	2.30151	2.29401
543.6	0.970076	0.96384	0.971124	0.96568	0.960032	1.50465	2.13401	2.074	1.54367	1.52012	1.71356	2.75641	2.90507	1.97845	1.90419	2.20649	2.79813	2.74481	1.90484	2.04379	2.50143	3.47213	3.25594	2.30314	2.29582
543.8	0.970948	0.965304	0.97302	0.967077	0.961913	1.50536	2.13474	2.0747	1.54521	1.52175	1.71366	2.75741	2.90601	1.97965	1.90615	2.2068	2.79811	2.74588	1.90647	2.04507	2.50144	3.47199	3.25677	2.30425	2.29669
544	0.972939	0.968067	0.975115	0.968884	0.964068	1.50668	2.13483	2.07599	1.54661	1.524	1.71423	2.75721	2.9062	1.98084	1.90816	2.20768	2.79715	2.74584	1.90858	2.04653	2.50209	3.47133	3.25541	2.30519	2.29803
544.2	0.973849	0.969662	0.976166	0.970438	0.965547	1.50722	2.13603	2.07781	1.54858	1.52577	1.71431	2.75671	2.906	1.9818	1.90991	2.20794	2.79765	2.74669	1.90938	2.04766	2.50192	3.47154	3.25433	2.30581	2.29955
544.4	0.975243	0.971838	0.977329	0.972339	0.967397	1.5086	2.13726	2.07881	1.55034	1.52789	1.71456	2.75688	2.90621	1.98279	1.91189	2.20766	2.7988	2.74685	1.91045	2.04908	2.50182	3.473	3.25339	2.30681	2.30155
544.6	0.976166	0.973349	0.978222	0.973629	0.968816	1.50936	2.13815	2.07912	1.55143	1.52933	1.71439	2.75706	2.90642	1.98432	1.91288	2.20693	2.79784	2.7462	1.91139	2.04963	2.50153	3.47236	3.25222	2.30782	2.30266
544.8	0.977503	0.975739	0.979902	0.975288	0.970499	1.50977	2.13915	2.07992	1.55258	1.53087	1.71458	2.75751	2.90635	1.98588	1.91452	2.20564	2.79639	2.74469	1.91215	2.05045	2.49974	3.47017	3.25055	2.30897	2.30374
545	0.979019	0.9788	0.980914	0.977507	0.972939	1.51002	2.14004	2.08021	1.55428	1.5326	1.71419	2.75608	2.90722	1.98678	1.91583	2.2043	2.79429	2.74393	1.91409	2.05221	2.50048	3.46894	3.2499	2.31002	2.30436
545.2	0.979949	0.979295	0.981879	0.978543	0.974022	1.51006	2.14075	2.07995	1.55502	1.53352	1.71455	2.75556	2.9059	1.98743	1.91637	2.20309	2.79418	2.74343	1.91428	2.05277	2.50006	3.46856	3.24912	2.3104	2.30479
545.4	0.982125	0.981308	0.982634	0.980657	0.97572	1.50931	2.14128	2.08254	1.5569	1.53498	1.71246	2.75368	2.90386	1.98832	1.91784	2.20067	2.79222	2.74327	1.91495	2.05386	2.49992	3.46664	3.24858	2.31062	2.30559
545.6	0.982708	0.981607	0.983295	0.981361	0.976503	1.50928	2.14159	2.08361	1.5578	1.53598	1.71258	2.75398	2.9034	1.98876	1.91836	2.20086	2.79265	2.7424	1.91537	2.05391	2.49938	3.46612	3.24748	2.31069	2.30553
545.8	0.984391	0.98338	0.984764	0.982702	0.978813	1.50876	2.14066	2.08493	1.55947	1.53741	1.71246	2.75275	2.90215	1.98982	1.91948	2.1994	2.79144	2.7417	1.91665	2.05458	2.49728	3.46314	3.24623	2.31128	2.30656
546	0.98494	0.984512	0.985671	0.983895	0.980056	1.50878	2.14111	2.08488	1.56025	1.53855	1.71175	2.75197	2.89992	1.99021	1.92017	2.19814	2.79074	2.74052	1.91689	2.05521	2.49622	3.46311	3.2455	2.31115	2.30679
546.2	0.98562	0.985363	0.985904	0.985287	0.981557	1.50876	2.1419	2.08373	1.56135	1.53969	1.71112	2.75122	2.89836	1.99094	1.92084	2.19697	2.78888	2.73957	1.91701	2.05532	2.49509	3.4616	3.24372	2.3108	2.30675
546.4	0.986317	0.985935	0.987204	0.986075	0.982815	1.50848	2.14204	2.08293	1.56193	1.54037	1.71042	2.75041	2.89673	1.99105	1.92125	2.19561	2.78736	2.73911	1.91699	2.05579	2.49357	3.45987	3.2422	2.30991	2.3065
546.6	0.987057	0.986489	0.988925	0.987541	0.984382	1.50876	2.14152	2.08216	1.56246	1.5413	1.71009	2.74889	2.89571	1.99124	1.92192	2.19433	2.78503	2.73783	1.91714	2.05615	2.49175	3.45655	3.23857	2.30893	2.30635
546.8	0.987929	0.987778	0.990612	0.988278	0.98552	1.50879	2.14171	2.08178	1.56334	1.54181	1.70918	2.74789	2.89468	1.99118	1.92224	2.19293	2.78356	2.73651	1.91764	2.05606	2.48943	3.45356	3.23635	2.30866	2.30648
547	0.989357	0.988541	0.99202	0.989232	0.986462	1.50815	2.14133	2.08174	1.56415	1.54238	1.70784	2.74667	2.8943	1.99082	1.92202	2.19141	2.78149	2.73452	1.91834	2.0562	2.48738	3.45097	3.23432	2.30783	2.3063
547.2	0.990543	0.989455	0.993119	0.990094	0.987305	1.50812	2.14134	2.08082	1.56404	1.54311	1.70676	2.74488	2.89194	1.99092	1.92197	2.19047	2.77993	2.73273	1.91805	2.0558	2.48563	3.44782	3.23108	2.30735	2.30622
547.4	0.991167	0.990706	0.993719	0.991422	0.988368	1.507	2.14148	2.07959	1.56441	1.54389	1.70519	2.74396	2.89007	1.99105	1.92189	2.18879	2.77837	2.73109	1.9177	2.05545	2.48281	3.44471	3.22742	2.30664	2.30553
547.6	0.992198	0.992296	0.994652	0.992866	0.989949	1.50631	2.1413	2.07746	1.56428	1.54451	1.70373	2.74154	2.88749	1.99066	1.92113	2.18655	2.77431	2.72919	1.91741	2.05447	2.47948	3.43979	3.22368	2.30539	2.30383
547.8	0.993105	0.992782	0.995447	0.993302	0.990631	1.50581	2.14121	2.07717	1.56456	1.54467	1.7031	2.73949	2.88575	1.98994	1.92082	2.18561	2.77238	2.72729	1.91735	2.05416	2.47759	3.43735	3.22148	2.30491	2.30339
548	0.99491	0.993116	0.996712	0.994576	0.992001	1.50538	2.13959	2.07701	1.56487	1.54479	1.70167	2.73758	2.88329	1.98841	1.92084	2.18301	2.77126	2.72383	1.91672	2.05364	2.47415	3.43331	3.21628	2.30373	2.30193
548.2	0.995269	0.992529	0.99682	0.994957	0.992522	1.50527	2.13894	2.07645	1.5651	1.54525	1.70085	2.73577	2.8811	1.98824	1.92029	2.18251	2.76957	2.72363	1.91613	2.05302	2.47244	3.43151	3.21419	2.30253	2.30101
548.4	0.996276	0.992997	0.997845	0.995949	0.993271	1.50484	2.13821	2.07533	1.56515	1.54546	1.69884	2.73333	2.87737	1.98677	1.92004	2.17878	2.76715	2.71927	1.91422	2.05178	2.46714	3.42717	3.20964	2.30088	2.29939
548.6	0.996583	0.99375	0.997912	0.996594	0.993978	1.50383	2.13637	2.07393	1.56508	1.54566	1.69716	2.73108	2.87468	1.98617	1.91951	2.17723	2.76518	2.71703	1.91335	2.05106	2.46435	3.42273	3.20594	2.30029	2.29807
548.8	0.996999	0.994356	0.998186	0.996815	0.995023	1.50348	2.13453	2.07124	1.56492	1.54582	1.69598	2.72806	2.87135	1.98585	1.91895	2.17546	2.76249	2.71357	1.91281	2.04999	2.45967	3.41885	3.20191	2.29892	2.29625
549	0.997609	0.994655	0.99874	0.997129	0.995457	1.50367	2.13364	2.07	1.56456	1.5457	1.69384	2.72506	2.86869	1.98466	1.91856	2.17268	2.75891	2.71093	1.91169	2.0495	2.45767	3.41527	3.19818	2.29705	2.29493
549.2	0.998483	0.99516	0.998915	0.997678	0.995867	1.50285	2.1324	2.06847	1.56395	1.54541	1.69102	2.7218	2.86543	1.98312	1.91796	2.16971	2.75451	2.70724	1.91015	2.04848	2.45541	3.40957	3.19316	2.29472	2.29281
549.4	0.998789	0.99491	0.999255	0.997988	0.996414	1.50188	2.13177	2.06732	1.56304	1.54478	1.68953	2.71867	2.86332	1.98219	1.91711	2.16765	2.75223	2.70493	1.90943	2.04729	2.45217	3.40503	3.18857	2.2935	2.29141
549.6	0.999271	0.995888	1	0.998606	0.997018	1.50093	2.1309	2.06628	1.56196	1.54427	1.68787	2.71561	2.85988	1.98045	1.91639	2.16525	2.7494	2.70077	1.90874	2.04613	2.44872	3.39987	3.18274	2.29151	2.28976
549.8	0.9996	0.997084	0.99997	0.998952	0.997564	1.50028	2.12913	2.06542	1.56123	1.54386	1.68655	2.71307	2.85749	1.97949	1.91551	2.16242	2.74574	2.69805	1.90776	2.0443	2.44627	3.39563	3.17824	2.29048	2.28828
550	1	0.998396	0.999749	0.999099	0.998117	1.49903	2.12637	2.06449	1.56064	1.54326	1.68359	2.71009	2.85423	1.97809	1.91429	2.15884	2.74226	2.69447	1.90653	2.04271	2.44233	3.39147	3.17406	2.28905	2.28598
550.2	0.999425	0.998474	0.998402	0.999465	0.998564	1.49737	2.12262	2.06284	1.55934	1.54286	1.68128	2.70586	2.85048	1.97601	1.91316	2.15586	2.73683	2.68924	1.90398	2.04071	2.43894	3.38647	3.16809	2.28583	2.28284
550.4	0.999486	0.999317	0.998603	0.999488	0.998892	1.49655	2.12194	2.06108	1.55874	1.54248	1.67962	2.7034	2.84836	1.97483	1.91267	2.15404	2.73422	2.6867	1.90292	2.03977	2.43626	3.38262	3.16365	2.28472	2.28159
550.6	0.999604	0.998741	0.998424	1	0.998864	1.49453	2.11826	2.05924	1.55816	1.54205	1.6769	2.69801	2.84246	1.9733	1.91111	2.14989	2.72871	2.68143	1.9012	2.03821	2.4301	3.37758	3.15719	2.28127	2.27823
550.8	0.999505	0.99866	0.998498	0.999883	0.999028	1.49368	2.11713	2.05722	1.55761	1.54122	1.67552	2.69459	2.8398	1.97235	1.91031	2.14813	2.72616	2.67895	1.90022	2.03746	2.42756	3.37474	3.15456	2.27983	2.27739
551	0.999665	0.997578	0.998578	0.999718	0.999032	1.49099	2.11408	2.05449	1.55641	1.54026	1.67247	2.68991	2.83541	1.96961	1.90906	2.14392	2.72086	2.67248	1.89852	2.03553	2.42317	3.36742	3.14716	2.27666	2.27467
551.2	0.999967	0.997335	0.997549	0.999548	0.999122	1.48942	2.11245	2.05194	1.55543	1.53954	1.67027	2.6866	2.83182	1.96803	1.90757	2.14126	2.71704	2.66924	1.89671	2.03384	2.41962	3.36182	3.14297	2.27425	2.27215
551.4	0.999487	0.998094	0.997901	0.999806	0.999297	1.48738	2.10991	2.04922	1.55414	1.53868	1.66766	2.68218	2.82621	1.96574	1.90516	2.13791	2.71153	2.66596	1.89478	2.03185	2.4156	3.35533	3.13831	2.27106	2.26977
551.6	0.999485	0.998487	0.997946	0.999636	0.999543	1.48599	2.10776	2.04763	1.55314	1.53804	1.66574	2.67908	2.82266	1.96375	1.90378	2.13525	2.70818	2.66154	1.89387	2.03008	2.4119	3.3499	3.13298	2.26926	2.2677
551.8	0.99874	0.998198	0.998093	0.999606	0.999888	1.48376	2.10563	2.04553	1.5516	1.53712	1.66316	2.67462	2.81854	1.96183	1.90165	2.13312	2.70353	2.65798	1.89189	2.02789	2.40709	3.34407	3.12585	2.2662	2.26531
552	0.998252	0.9986	0.998138	0.999409	1	1.48255	2.10376	2.04274	1.5504	1.53613	1.66089	2.67084	2.81493	1.96024	1.90003	2.13043	2.69903	2.65425	1.89041	2.02648	2.40336	3.3389	3.11952	2.26308	2.26342
552.2	0.99769	0.998801	0.998592	0.999435	0.999769	1.48018	2.10174	2.04014	1.54874	1.53481	1.65771	2.66617	2.81085	1.95789	1.89807	2.12695	2.69406	2.64916	1.88848	2.02411	2.39972	3.33174	3.11253	2.25944	2.26077
552.4	0.997466	0.99926	0.998436	0.999676	0.999677	1.47783	2.0992	2.03797	1.54766	1.53378	1.65568	2.6618	2.80643	1.95588	1.89607	2.12429	2.68939	2.64477	1.88708	2.0219	2.3959	3.32675	3.10811	2.25684	2.25832
552.6	0.996771	0.99943	0.9977	0.999762	0.999548	1.4755	2.09635	2.03507	1.54642	1.53278	1.65241	2.65566	2.80113	1.95314	1.89352	2.12142	2.68427	2.6394	1.88465	2.01892	2.3901	3.32075	3.1022	2.25438	2.25532
552.8	0.996683	1	0.997775	0.999468	0.999397	1.47218	2.09181	2.03063	1.54521	1.53169	1.64944	2.65059	2.79508	1.9503	1.89055	2.11678	2.67822	2.6325	1.88115	2.01562	2.38482	3.31197	3.0948	2.25004	2.25107
553	0.996135	0.999011	0.997305	0.99906	0.999205	1.47074	2.0897	2.02897	1.544	1.53085	1.64734	2.6469	2.79197	1.9491	1.88877	2.11435	2.67391	2.63005	1.87942	2.01409	2.38154	3.30685	3.09066	2.24751	2.24889
553.2	0.996059	0.997695	0.996627	0.998359	0.998516	1.46739	2.08607	2.02552	1.54162	1.52914	1.64385	2.64078	2.78518	1.9456	1.88554	2.10958	2.6674	2.62272	1.87665	2.01134	2.37479	3.29695	3.0819	2.24265	2.24425
553.4	0.995571	0.99696	0.995699	0.998001	0.998408	1.46542	2.08352	2.0222	1.54009	1.52783	1.64177	2.63545	2.78097	1.94331	1.88337	2.10579	2.66345	2.61918	1.87478	2.00901	2.37062	3.29007	3.07624	2.23948	2.2417
553.6	0.9954	0.996602	0.995285	0.997287	0.997934	1.46322	2.08026	2.01885	1.53823	1.52586	1.63885	2.63009	2.77552	1.94089	1.88065	2.10122	2.65909	2.61376	1.873	2.00593	2.36476	3.28221	3.06947	2.23517	2.23828
553.8	0.994724	0.99613	0.99439	0.996895	0.997544	1.46206	2.07801	2.01594	1.53692	1.52412	1.63599	2.6252	2.77208	1.93878	1.87867	2.09795	2.65524	2.60922	1.87041	2.0037	2.36049	3.27578	3.06305	2.23186	2.2352
554	0.994189	0.995808	0.993281	0.996338	0.997283	1.45959	2.07576	2.0116	1.53507	1.52228	1.63242	2.62046	2.76749	1.93557	1.8758	2.09294	2.64978	2.60296	1.86711	2.00021	2.35612	3.26724	3.05596	2.22796	2.23149
554.2	0.993348	0.99564	0.992662	0.995918	0.996676	1.45807	2.07345	2.00964	1.53324	1.52099	1.62949	2.61591	2.76212	1.93367	1.87339	2.08893	2.64475	2.59854	1.86472	1.99762	2.35192	3.26027	3.04955	2.22469	2.22832
554.4	0.992922	0.994886	0.99208	0.9954	0.996318	1.4554	2.06991	2.00636	1.53133	1.51883	1.62665	2.61109	2.75442	1.93092	1.87019	2.08387	2.63961	2.5929	1.86191	1.99389	2.3459	3.2526	3.04178	2.22051	2.2242
554.6	0.991684	0.994916	0.992109	0.994978	0.995965	1.45342	2.06691	2.00361	1.52929	1.51716	1.62379	2.60601	2.74984	1.92794	1.86802	2.07969	2.6346	2.58708	1.85962	1.99136	2.3414	3.24599	3.03577	2.21731	2.22114
554.8	0.990593	0.994447	0.991911	0.994242	0.9954	1.45137	2.06329	1.99963	1.52695	1.51538	1.62015	2.59912	2.74392	1.925	1.86583	2.07495	2.62978	2.58014	1.85657	1.98796	2.33536	3.2388	3.02771	2.21324	2.2169
555	0.989148	0.992586	0.990709	0.993646	0.994292	1.44797	2.05827	1.99384	1.52437	1.51302	1.61465	2.59107	2.7352	1.92137	1.8629	2.06903	2.62379	2.5733	1.85297	1.98397	2.3289	3.22953	3.0191	2.20748	2.21082
555.2	0.989084	0.992639	0.990313	0.992906	0.993834	1.44658	2.05488	1.99177	1.52311	1.51194	1.6128	2.58693	2.73112	1.91913	1.86116	2.06586	2.61988	2.56753	1.85089	1.98178	2.32574	3.22362	3.01521	2.20497	2.2082
555.4	0.988621	0.99062	0.988624	0.992015	0.992811	1.44371	2.05005	1.9878	1.52062	1.50954	1.6084	2.57937	2.72277	1.9145	1.8576	2.05925	2.61448	2.5581	1.84735	1.97719	2.31932	3.21316	3.00683	2.19962	2.20305
555.6	0.988492	0.989863	0.987592	0.991376	0.992448	1.44162	2.0457	1.98501	1.51845	1.50812	1.606	2.57541	2.71721	1.9115	1.85522	2.05494	2.60899	2.55341	1.84461	1.97469	2.31427	3.20662	3.00076	2.19596	2.19967
555.8	0.988059	0.98861	0.987063	0.99056	0.991628	1.43849	2.0408	1.98058	1.51605	1.50595	1.60292	2.56933	2.71025	1.90807	1.85183	2.04889	2.60333	2.54646	1.84118	1.97149	2.30778	3.19761	2.9928	2.19164	2.19503
556	0.987491	0.987781	0.986003	0.989798	0.9911	1.43689	2.03664	1.97782	1.51402	1.50387	1.60068	2.56414	2.70434	1.90556	1.8492	2.04438	2.59805	2.54172	1.83863	1.96898	2.30297	3.19018	2.98691	2.18754	2.19162
556.2	0.98643	0.98647	0.984981	0.988896	0.990202	1.43467	2.03282	1.97392	1.51128	1.50147	1.59711	2.5568	2.69665	1.9019	1.84555	2.03807	2.59112	2.53557	1.83534	1.96533	2.29696	3.18152	2.97803	2.18203	2.18689
556.4	0.985353	0.985746	0.983999	0.988318	0.989481	1.43251	2.02852	1.97049	1.50958	1.49967	1.59366	2.55165	2.69118	1.89893	1.84293	2.03402	2.58697	2.53113	1.83246	1.96179	2.29235	3.17508	2.97359	2.17866	2.18299
556.6	0.984299	0.984661	0.983517	0.9872	0.988633	1.43021	2.02453	1.96652	1.50726	1.49738	1.5892	2.54486	2.68386	1.89518	1.83966	2.02929	2.58163	2.52484	1.8284	1.95784	2.28647	3.16728	2.96545	2.17418	2.17813
556.8	0.983887	0.984088	0.983166	0.986494	0.987679	1.42805	2.02146	1.96336	1.50538	1.49562	1.58557	2.54022	2.67748	1.8918	1.83712	2.02539	2.57562	2.51932	1.8252	1.95435	2.28121	3.16045	2.95812	2.17068	2.17396
557	0.98292	0.983216	0.982226	0.985412	0.986634	1.42504	2.01704	1.95937	1.50322	1.49325	1.58098	2.53287	2.66917	1.88768	1.83356	2.02062	2.56762	2.51405	1.82085	1.94996	2.27533	3.15091	2.94935	2.16614	2.16896
557.2	0.981601	0.982554	0.981313	0.984111	0.985209	1.42101	2.00974	1.9546	1.4996	1.49072	1.57609	2.5255	2.65771	1.88246	1.82896	2.01548	2.5595	2.50569	1.81609	1.94422	2.26805	3.14002	2.94033	2.16081	2.16289
557.4	0.981057	0.982415	0.980763	0.983504	0.984716	1.41954	2.00634	1.95295	1.49808	1.48909	1.57345	2.52172	2.65238	1.87965	1.82654	2.01183	2.55549	2.50118	1.81381	1.94218	2.26428	3.13426	2.93515	2.15783	2.15954
557.6	0.980446	0.980699	0.979258	0.98212	0.983442	1.41593	2.00215	1.94584	1.49485	1.48618	1.56821	2.51403	2.64392	1.87369	1.82219	2.00483	2.54838	2.49237	1.80876	1.9365	2.25562	3.12393	2.9267	2.15183	2.15292
557.8	0.979294	0.980282	0.978111	0.980966	0.982322	1.41405	1.99721	1.94252	1.4921	1.48442	1.56436	2.50736	2.63781	1.87077	1.8194	2.00113	2.54266	2.48714	1.80554	1.93297	2.25042	3.11726	2.92059	2.14797	2.14927
558	0.978506	0.979191	0.976593	0.979522	0.981031	1.41164	1.99181	1.93896	1.48948	1.48222	1.55999	2.50091	2.63072	1.86646	1.81575	1.9965	2.53606	2.47994	1.80162	1.92865	2.24324	3.10874	2.91189	2.14245	2.14418
558.2	0.977836	0.978365	0.975442	0.978426	0.980216	1.4093	1.98834	1.93615	1.48733	1.47971	1.55671	2.49507	2.62464	1.86294	1.81237	1.99118	2.52962	2.47366	1.79815	1.925	2.23866	3.10031	2.90463	2.13851	2.14008
558.4	0.976869	0.977795	0.974053	0.977098	0.978882	1.40679	1.98503	1.93207	1.48459	1.47674	1.55304	2.48727	2.61614	1.85847	1.80811	1.98555	2.52124	2.4666	1.79388	1.92051	2.2321	3.08935	2.89519	2.13348	2.13529
558.6	0.975539	0.977469	0.972944	0.976228	0.977991	1.40356	1.98072	1.928	1.48205	1.47431	1.54944	2.48202	2.61028	1.85467	1.80498	1.98031	2.51413	2.4626	1.79068	1.91681	2.22758	3.0821	2.8883	2.12864	2.13071
558.8	0.973556	0.976865	0.971578	0.975338	0.976839	1.3999	1.97465	1.92333	1.47882	1.47162	1.54467	2.475	2.60326	1.85029	1.80077	1.97405	2.50553	2.4555	1.78618	1.91219	2.22197	3.07247	2.87895	2.12308	2.12527
559	0.972219	0.976072	0.970417	0.974431	0.975451	1.39703	1.9711	1.91972	1.47626	1.46924	1.5402	2.46899	2.59772	1.84721	1.79722	1.96982	2.50027	2.44977	1.78222	1.90829	2.2166	3.06467	2.87115	2.11877	2.12118
559.2	0.970547	0.974811	0.968403	0.973285	0.974083	1.39382	1.96667	1.91505	1.47262	1.46654	1.53478	2.46167	2.59008	1.84268	1.79313	1.9651	2.49354	2.44386	1.7776	1.90328	2.21003	3.05533	2.86059	2.11286	2.11585
559.4	0.968725	0.97369	0.966734	0.971553	0.972001	1.38938	1.96201	1.90764	1.46871	1.46302	1.52892	2.45242	2.58039	1.83686	1.78871	1.95819	2.48492	2.43545	1.77257	1.89671	2.20272	3.04335	2.84906	2.10593	2.10838
559.6	0.967593	0.972974	0.9658	0.970843	0.970963	1.38721	1.95947	1.90402	1.46683	1.46115	1.52534	2.44803	2.57611	1.83381	1.78691	1.95559	2.48048	2.4313	1.77012	1.89428	2.19872	3.03765	2.84382	2.10325	2.10475
559.8	0.966281	0.971864	0.965169	0.969255	0.969164	1.38258	1.95553	1.8976	1.46264	1.45702	1.51969	2.43817	2.5666	1.82802	1.7817	1.94788	2.47055	2.42143	1.76423	1.88921	2.19034	3.02506	2.83157	2.0959	2.09899
560	0.964619	0.970118	0.963701	0.968091	0.967973	1.3802	1.95124	1.89344	1.45992	1.45413	1.51606	2.43104	2.56081	1.82421	1.77808	1.94322	2.46397	2.41516	1.7609	1.88501	2.18461	3.01644	2.82328	2.09087	2.09413
560.2	0.962803	0.968348	0.962479	0.966275	0.966291	1.3769	1.94618	1.88831	1.45657	1.4507	1.51153	2.4229	2.55298	1.81963	1.77391	1.93662	2.4565	2.40752	1.75639	1.88009	2.17753	3.00633	2.81315	2.0847	2.0885
560.4	0.961786	0.966976	0.961344	0.965314	0.965211	1.37392	1.94259	1.8848	1.45365	1.44802	1.50744	2.41643	2.54621	1.81561	1.77039	1.93029	2.45006	2.40077	1.75293	1.87594	2.17116	2.99833	2.80575	2.08001	2.0834
560.6	0.960956	0.965075	0.960199	0.963704	0.963826	1.37011	1.93795	1.88031	1.4502	1.44472	1.50261	2.409	2.53852	1.81071	1.76567	1.92218	2.44138	2.39218	1.749	1.87041	2.16433	2.98919	2.79628	2.07359	2.07729
560.8	0.959325	0.963181	0.958664	0.962127	0.962472	1.36694	1.93332	1.87603	1.44736	1.4421	1.49853	2.40156	2.53345	1.80691	1.7619	1.91642	2.43535	2.38722	1.74584	1.86598	2.15827	2.98184	2.78715	2.06821	2.07235
561	0.957087	0.961317	0.957153	0.960605	0.961233	1.36274	1.9263	1.87138	1.44379	1.43848	1.49401	2.39353	2.52528	1.80202	1.75699	1.90991	2.42631	2.38044	1.74204	1.86083	2.15195	2.97065	2.77689	2.06187	2.06625
561.2	0.955864	0.95973	0.95608	0.959881	0.959927	1.35929	1.92206	1.86725	1.44099	1.4356	1.4898	2.38741	2.51846	1.79778	1.75291	1.90419	2.42002	2.37411	1.73819	1.8562	2.14662	2.96115	2.76856	2.05685	2.06125
561.4	0.953801	0.957465	0.954109	0.958561	0.958053	1.35444	1.91589	1.86191	1.43757	1.43198	1.48504	2.37936	2.50867	1.79314	1.74773	1.89726	2.41187	2.36681	1.73337	1.85073	2.13966	2.94889	2.75792	2.05024	2.05518
561.6	0.950898	0.954794	0.950776	0.957047	0.955748	1.3486	1.90936	1.85444	1.43277	1.42815	1.47929	2.3715	2.49894	1.78669	1.74161	1.88999	2.40162	2.35775	1.72763	1.84433	2.13002	2.93572	2.7469	2.04213	2.04775
561.8	0.949141	0.952918	0.949444	0.955598	0.954368	1.34468	1.90497	1.85067	1.42983	1.42521	1.47517	2.36493	2.4931	1.78273	1.73762	1.88473	2.39465	2.35092	1.72385	1.83995	2.12339	2.92771	2.73938	2.03723	2.04289
562	0.946836	0.95107	0.948201	0.953646	0.952669	1.34032	1.89855	1.84566	1.42593	1.42181	1.4696	2.35676	2.48444	1.77784	1.73254	1.87864	2.38652	2.3413	1.71881	1.8342	2.11509	2.91647	2.72904	2.03087	2.03679
562.2	0.946129	0.949769	0.947267	0.951983	0.951439	1.33731	1.8938	1.83999	1.4231	1.41868	1.4654	2.35054	2.47666	1.77326	1.72872	1.87345	2.37961	2.33482	1.71501	1.82962	2.10865	2.90847	2.72183	2.02497	2.03151
562.4	0.944347	0.947754	0.94519	0.95031	0.950028	1.33329	1.88732	1.83362	1.41973	1.41515	1.46084	2.34119	2.46744	1.76768	1.724	1.86739	2.37088	2.32647	1.71043	1.82384	2.10093	2.89777	2.71188	2.01797	2.02466
562.6	0.94244	0.946333	0.943502	0.948893	0.948366	1.32983	1.88158	1.82928	1.41687	1.41194	1.45659	2.33478	2.4613	1.76337	1.71971	1.86141	2.36479	2.31887	1.70613	1.81877	2.0944	2.88806	2.70416	2.01302	2.01986
562.8	0.940201	0.944556	0.941537	0.946976	0.946502	1.32576	1.87444	1.82449	1.41307	1.40787	1.45129	2.32612	2.45307	1.75788	1.71422	1.85424	2.35621	2.31022	1.70092	1.81287	2.0868	2.87707	2.69456	2.00659	2.01416
563	0.938513	0.943475	0.94001	0.945193	0.945107	1.32195	1.86844	1.81985	1.40945	1.40482	1.44778	2.32007	2.44606	1.75352	1.71001	1.84848	2.34901	2.30339	1.69663	1.80806	2.07964	2.86793	2.68563	2.0013	2.0088
563.2	0.936187	0.941799	0.937965	0.943183	0.943239	1.31786	1.86181	1.81452	1.40538	1.40143	1.44296	2.3127	2.43787	1.74781	1.70473	1.84146	2.33997	2.29555	1.6918	1.80223	2.07142	2.85769	2.67469	1.99495	2.00176
563.4	0.933701	0.939678	0.9349	0.941225	0.940592	1.31169	1.85483	1.80773	1.40059	1.39707	1.4369	2.3044	2.42606	1.74122	1.69823	1.83231	2.33082	2.28548	1.68498	1.79503	2.06289	2.84304	2.66611	1.98671	1.9937
563.6	0.932138	0.937576	0.933085	0.939596	0.938936	1.30825	1.84933	1.80223	1.39713	1.39368	1.43258	2.29755	2.41901	1.73697	1.69421	1.82702	2.32456	2.27852	1.68039	1.79037	2.05673	2.83382	2.65769	1.98078	1.98845
563.8	0.929937	0.935751	0.93114	0.937575	0.936935	1.30442	1.84308	1.79556	1.39305	1.38994	1.42739	2.2887	2.40978	1.73183	1.68924	1.81993	2.31733	2.27062	1.67522	1.78465	2.04857	2.82228	2.64687	1.97364	1.98244
564	0.927852	0.934215	0.929157	0.936172	0.93546	1.30181	1.83804	1.79145	1.38944	1.38693	1.42346	2.28186	2.40254	1.7274	1.68496	1.81555	2.31138	2.26272	1.67066	1.78029	2.04297	2.81296	2.63866	1.96766	1.97762
564.2	0.925949	0.932342	0.92658	0.934289	0.933295	1.29724	1.83104	1.78597	1.38544	1.3829	1.41882	2.27306	2.39361	1.72212	1.67953	1.80986	2.30245	2.25316	1.66476	1.77479	2.03571	2.80098	2.62837	1.96056	1.97124
564.4	0.924405	0.930528	0.924406	0.932524	0.931565	1.29372	1.82626	1.78197	1.38233	1.37973	1.41502	2.26588	2.3868	1.7179	1.67562	1.80455	2.29646	2.24594	1.66021	1.77008	2.02782	2.79239	2.61977	1.95498	1.96568
564.6	0.922158	0.928403	0.922503	0.929968	0.929538	1.28939	1.82062	1.77608	1.3784	1.37544	1.40981	2.25792	2.37813	1.71241	1.67087	1.79799	2.28873	2.23801	1.65472	1.76466	2.01858	2.7817	2.60946	1.94797	1.95824
564.8	0.920877	0.927177	0.921677	0.928367	0.92779	1.28616	1.81593	1.77047	1.37473	1.3724	1.40519	2.24987	2.37198	1.70806	1.66661	1.79227	2.28137	2.23131	1.65052	1.75996	2.01254	2.77384	2.6003	1.94214	1.95272
565	0.919066	0.925524	0.919965	0.926025	0.925664	1.28206	1.809	1.76392	1.3704	1.36835	1.39919	2.23989	2.36327	1.70226	1.66135	1.78436	2.27298	2.22264	1.64519	1.75427	2.00463	2.76434	2.58941	1.93532	1.94597
565.2	0.917539	0.923777	0.918095	0.92415	0.923929	1.27911	1.80417	1.75907	1.36681	1.36515	1.39481	2.2333	2.35513	1.69776	1.65719	1.77902	2.26516	2.21606	1.64072	1.74938	1.99915	2.75501	2.58024	1.92953	1.94039
565.4	0.915631	0.921102	0.915446	0.922215	0.921629	1.2752	1.79951	1.75283	1.36258	1.36104	1.39021	2.22468	2.34661	1.69188	1.65221	1.77172	2.25708	2.20849	1.63532	1.74342	1.99102	2.7442	2.56945	1.92267	1.93347
565.6	0.912576	0.918092	0.913265	0.919348	0.919256	1.27022	1.7924	1.74569	1.35747	1.35578	1.38466	2.21425	2.33664	1.6847	1.64589	1.76283	2.24685	2.19761	1.62883	1.73636	1.98148	2.73105	2.55639	1.91457	1.92497
565.8	0.910979	0.916477	0.912128	0.917236	0.917696	1.26711	1.78814	1.74134	1.3539	1.35252	1.37979	2.20785	2.32899	1.67997	1.64135	1.75746	2.23884	2.19115	1.62418	1.73168	1.97556	2.72272	2.54746	1.90887	1.91919
566	0.908706	0.913702	0.910462	0.915235	0.915712	1.26307	1.78311	1.73618	1.34948	1.34879	1.37399	2.19982	2.31959	1.67407	1.63607	1.75084	2.22827	2.18322	1.61906	1.72611	1.96688	2.71187	2.5369	1.90146	1.91172
566.2	0.906953	0.911668	0.908596	0.913676	0.914006	1.26027	1.77868	1.7306	1.34662	1.34541	1.36985	2.1935	2.312	1.66961	1.63161	1.74497	2.22165	2.17615	1.61479	1.72142	1.9606	2.70264	2.52862	1.89533	1.90578
566.4	0.90489	0.90882	0.906079	0.91137	0.911816	1.25604	1.77248	1.72486	1.34301	1.34134	1.36449	2.18568	2.30222	1.66368	1.62593	1.73795	2.21275	2.16761	1.60964	1.71561	1.95343	2.69153	2.5188	1.8874	1.89885
566.6	0.90329	0.907232	0.904301	0.909343	0.910237	1.25268	1.76668	1.71969	1.33967	1.33774	1.36082	2.17769	2.29474	1.65928	1.6219	1.73305	2.20586	2.16087	1.60547	1.7108	1.94652	2.68246	2.50991	1.88164	1.8936
566.8	0.90177	0.905679	0.902791	0.906817	0.908243	1.24785	1.75898	1.71322	1.33523	1.33346	1.35562	2.16995	2.28625	1.65351	1.6167	1.72645	2.19611	2.15175	1.60016	1.70484	1.93791	2.67127	2.49707	1.87455	1.88685
567	0.899851	0.90388	0.900601	0.904885	0.906616	1.24428	1.75439	1.70881	1.33208	1.3304	1.35118	2.16363	2.27954	1.64844	1.61204	1.72191	2.18883	2.14471	1.59606	1.70004	1.9316	2.66236	2.48856	1.86893	1.88142
567.2	0.897503	0.901516	0.898054	0.902691	0.904386	1.23942	1.74825	1.70385	1.32765	1.32626	1.34598	2.15555	2.27059	1.64215	1.60606	1.71571	2.17892	2.13588	1.59046	1.69389	1.9237	2.65063	2.47892	1.86207	1.87414
567.4	0.894382	0.899445	0.895642	0.899817	0.901443	1.23319	1.7412	1.69508	1.3228	1.32066	1.33871	2.14486	2.26022	1.63533	1.59973	1.7068	2.16735	2.12692	1.5831	1.68631	1.91402	2.63542	2.46709	1.85382	1.86523
567.6	0.892117	0.897977	0.894004	0.897823	0.899662	1.22999	1.73695	1.68937	1.31923	1.31698	1.33421	2.13903	2.25274	1.63035	1.59514	1.70128	2.15949	2.12021	1.57835	1.68136	1.90763	2.62587	2.45848	1.84815	1.86026
567.8	0.889333	0.896054	0.892029	0.895086	0.897557	1.22526	1.73147	1.68221	1.31455	1.3126	1.32839	2.13122	2.24268	1.62434	1.5892	1.69427	2.15004	2.11174	1.57281	1.67516	1.90019	2.61466	2.44788	1.8409	1.85392
568	0.88741	0.89382	0.889663	0.893405	0.89557	1.2217	1.72582	1.67798	1.31148	1.30942	1.32399	2.12442	2.23483	1.61992	1.58438	1.68849	2.14245	2.10501	1.56859	1.67016	1.89417	2.60554	2.43936	1.83516	1.84815
568.2	0.884672	0.891262	0.887025	0.891112	0.893406	1.21724	1.71965	1.67334	1.30762	1.305	1.31856	2.11669	2.22595	1.61405	1.5786	1.68235	2.13294	2.09624	1.56311	1.66387	1.88582	2.59425	2.42917	1.82841	1.84102
568.4	0.88276	0.888867	0.884679	0.889278	0.891836	1.21346	1.71469	1.66903	1.30414	1.30161	1.31407	2.10971	2.21959	1.60942	1.57384	1.67687	2.1274	2.08819	1.55866	1.65898	1.87934	2.58544	2.42011	1.82259	1.83515
568.6	0.880467	0.885984	0.882267	0.887018	0.88949	1.20877	1.70877	1.66242	1.3	1.29738	1.30849	2.1014	2.2107	1.60351	1.56818	1.67047	2.12004	2.07923	1.55284	1.65279	1.87135	2.57369	2.40993	1.81559	1.82802
568.8	0.878382	0.884244	0.880068	0.884879	0.887413	1.20476	1.7033	1.65753	1.29644	1.2939	1.30421	2.0952	2.20311	1.59903	1.56342	1.66497	2.11344	2.07276	1.54827	1.64774	1.86582	2.56457	2.40163	1.80939	1.82196
569	0.875765	0.882155	0.877439	0.882426	0.884745	1.20035	1.69711	1.65177	1.29179	1.2898	1.2985	2.08693	2.1937	1.59353	1.55768	1.65818	2.10538	2.06446	1.54236	1.64119	1.85835	2.55361	2.39123	1.80238	1.81483
569.2	0.872415	0.879023	0.875089	0.879424	0.881575	1.19475	1.68892	1.6443	1.28649	1.28448	1.29242	2.07786	2.18183	1.58622	1.55098	1.64946	2.09652	2.05361	1.53548	1.63404	1.84854	2.53917	2.37923	1.79337	1.80621
569.4	0.870374	0.876565	0.872902	0.877177	0.879653	1.1909	1.68321	1.63965	1.28305	1.28086	1.28816	2.07107	2.17428	1.58155	1.54622	1.64299	2.08981	2.04637	1.53075	1.62937	1.84213	2.53041	2.37089	1.788	1.80038
569.6	0.868106	0.8742	0.870704	0.874304	0.876984	1.18608	1.67686	1.63466	1.2784	1.2763	1.28177	2.06287	2.16525	1.57556	1.5406	1.63627	2.08072	2.0365	1.52536	1.623	1.83365	2.51858	2.36072	1.78122	1.79311
569.8	0.865944	0.873159	0.868374	0.872335	0.87495	1.18213	1.67187	1.62971	1.27471	1.27291	1.27792	2.05634	2.15753	1.57069	1.53581	1.63052	2.07436	2.02962	1.52063	1.6176	1.82673	2.51005	2.35242	1.77563	1.78758
570	0.863279	0.870711	0.865913	0.869951	0.872272	1.17778	1.66477	1.62302	1.26994	1.26846	1.27241	2.04843	2.14833	1.56472	1.5299	1.62282	2.06518	2.02069	1.51442	1.61153	1.81911	2.49854	2.34261	1.76813	1.78053
570.2	0.861499	0.868387	0.863592	0.867935	0.870206	1.17463	1.65988	1.6175	1.26637	1.26506	1.26787	2.04105	2.1403	1.55986	1.52513	1.61728	2.05834	2.01436	1.50936	1.60644	1.81328	2.48872	2.33543	1.76222	1.77454
570.4	0.859293	0.865763	0.861096	0.865568	0.867583	1.17003	1.65382	1.61085	1.26203	1.26068	1.26281	2.03186	2.1295	1.55379	1.51927	1.60988	2.04902	2.00631	1.50352	1.6003	1.80576	2.47682	2.32427	1.75483	1.76693
570.6	0.857323	0.863795	0.858976	0.863192	0.86541	1.16623	1.64855	1.60594	1.25827	1.25693	1.2587	2.02606	2.12199	1.54865	1.51467	1.60455	2.04159	1.99921	1.49904	1.59548	1.79961	2.46842	2.31537	1.7488	1.76115
570.8	0.854636	0.861449	0.855977	0.860626	0.862817	1.16165	1.64213	1.59949	1.25375	1.25219	1.25365	2.01911	2.11298	1.54245	1.50901	1.59747	2.0324	1.9895	1.49321	1.58894	1.79174	2.45851	2.3045	1.74102	1.75414
571	0.851946	0.857934	0.8524	0.857486	0.859629	1.15586	1.63388	1.59235	1.24804	1.24759	1.24727	2.00852	2.10149	1.53539	1.50289	1.5893	2.02263	1.97817	1.48656	1.58118	1.78278	2.44527	2.29255	1.73281	1.74465
571.2	0.850671	0.856264	0.851147	0.856158	0.857938	1.15341	1.62918	1.58881	1.24543	1.24483	1.24452	2.00272	2.09583	1.53172	1.49938	1.58482	2.01681	1.97248	1.48325	1.57749	1.77766	2.43945	2.28685	1.72821	1.73982
571.4	0.848572	0.85351	0.84888	0.85353	0.855568	1.14955	1.62211	1.58154	1.24036	1.24011	1.2397	1.99277	2.08634	1.52571	1.49358	1.57775	2.00869	1.9633	1.47704	1.57129	1.76991	2.42863	2.27688	1.72103	1.73289
571.6	0.846411	0.85119	0.847139	0.851253	0.853242	1.14623	1.61694	1.57551	1.23636	1.23665	1.23599	1.98511	2.07799	1.52066	1.48906	1.57191	2.00192	1.95607	1.47185	1.56631	1.76362	2.41935	2.26884	1.71508	1.72756
571.8	0.843689	0.848664	0.844078	0.847599	0.849537	1.14133	1.60905	1.5676	1.23064	1.23127	1.22948	1.9761	2.06567	1.51371	1.48268	1.56342	1.99011	1.94632	1.46442	1.55825	1.75478	2.40716	2.25723	1.70649	1.71873
572	0.841145	0.846721	0.841045	0.845034	0.846914	1.13702	1.60129	1.561	1.22603	1.22672	1.22481	1.96634	2.0565	1.50793	1.47689	1.55611	1.98002	1.93758	1.45892	1.55236	1.74677	2.39629	2.24669	1.69957	1.7116
572.2	0.839323	0.844815	0.838664	0.843051	0.844761	1.1334	1.59567	1.55637	1.22216	1.22316	1.21999	1.95839	2.04832	1.50306	1.47232	1.55031	1.97267	1.93056	1.45439	1.54752	1.7407	2.38779	2.23773	1.69426	1.70619
572.4	0.836947	0.84144	0.83569	0.84041	0.842317	1.12899	1.58942	1.54978	1.21765	1.2184	1.21529	1.94876	2.03921	1.49717	1.46589	1.54377	1.96255	1.9216	1.44828	1.54145	1.73251	2.37557	2.22802	1.68699	1.69861
572.6	0.835076	0.838887	0.832959	0.838021	0.840374	1.12566	1.5847	1.5443	1.21411	1.21444	1.21094	1.94094	2.03224	1.49252	1.46108	1.53879	1.95457	1.91472	1.44348	1.53654	1.72597	2.36602	2.21954	1.68162	1.69281
572.8	0.832554	0.83661	0.830372	0.835382	0.837648	1.1214	1.57803	1.53738	1.20942	1.20984	1.20547	1.9315	2.02424	1.48675	1.45504	1.53183	1.94526	1.90699	1.43709	1.52994	1.71828	2.35488	2.20923	1.67444	1.68597
573	0.830334	0.834556	0.828043	0.833382	0.835712	1.11801	1.57293	1.53191	1.20573	1.20636	1.20168	1.92397	2.01705	1.48203	1.45034	1.52665	1.93939	1.90097	1.43212	1.5247	1.71281	2.34539	2.20141	1.66852	1.6804
573.2	0.827531	0.831185	0.8254	0.830362	0.832975	1.11359	1.56681	1.52469	1.20101	1.20198	1.19557	1.91362	2.00753	1.47583	1.44478	1.52046	1.93067	1.89232	1.4262	1.51832	1.70589	2.33391	2.19068	1.66167	1.67299
573.4	0.825216	0.828407	0.823449	0.828128	0.830879	1.10981	1.56249	1.5199	1.19713	1.19834	1.19068	1.90633	1.99979	1.47111	1.4401	1.51538	1.9231	1.88607	1.42169	1.51317	1.69917	2.32486	2.18107	1.65634	1.66697
573.6	0.821318	0.824399	0.819702	0.825315	0.827425	1.10363	1.55385	1.51307	1.19131	1.19282	1.18384	1.89591	1.98934	1.46448	1.4331	1.50673	1.91268	1.87594	1.41532	1.50585	1.68921	2.31281	2.16841	1.64759	1.6587
573.8	0.818683	0.821543	0.817001	0.822799	0.824939	1.09953	1.54741	1.50737	1.18669	1.18817	1.17821	1.8865	1.98014	1.45891	1.42721	1.49941	1.90436	1.86696	1.40962	1.49918	1.68097	2.30195	2.15924	1.64075	1.65176
574	0.816633	0.81932	0.814969	0.820844	0.823054	1.09611	1.54216	1.50156	1.18295	1.18462	1.17349	1.87855	1.97332	1.45449	1.42252	1.49368	1.89844	1.86021	1.40504	1.49382	1.67435	2.29279	2.15118	1.63531	1.6462
574.2	0.81412	0.816323	0.812479	0.81796	0.820529	1.09177	1.53525	1.49591	1.17821	1.17983	1.1681	1.86916	1.9634	1.44839	1.41652	1.48749	1.88913	1.85177	1.39937	1.48789	1.66633	2.28083	2.141	1.62795	1.63857
574.4	0.811699	0.81465	0.810479	0.815907	0.818513	1.0886	1.52966	1.49078	1.17439	1.1757	1.1644	1.86158	1.95677	1.44339	1.41159	1.48243	1.88182	1.84533	1.39468	1.4831	1.66002	2.27153	2.13312	1.62189	1.6326
574.6	0.808946	0.81272	0.807266	0.813173	0.815753	1.08441	1.52335	1.48458	1.16993	1.17128	1.15864	1.85342	1.94881	1.43721	1.40624	1.47632	1.87264	1.83718	1.38817	1.47671	1.65284	2.25993	2.12206	1.61438	1.62574
574.8	0.806379	0.810856	0.80504	0.810996	0.813441	1.08059	1.51817	1.48006	1.16626	1.16783	1.15418	1.84692	1.94257	1.43222	1.40193	1.47104	1.86537	1.8302	1.38335	1.47158	1.64673	2.25091	2.11335	1.60849	1.61986
575	0.802937	0.808047	0.801876	0.807633	0.810585	1.07557	1.50996	1.4728	1.16069	1.16201	1.14723	1.83689	1.93157	1.42439	1.39484	1.46222	1.85398	1.82119	1.37645	1.4639	1.63694	2.23784	2.10008	1.59995	1.61121
575.2	0.79988	0.805015	0.799607	0.805065	0.808041	1.07108	1.50361	1.4666	1.15617	1.15712	1.14133	1.82742	1.92225	1.41779	1.389	1.45522	1.84487	1.81351	1.37042	1.45759	1.62887	2.22513	2.0896	1.59289	1.60405
575.4	0.797652	0.802465	0.797422	0.802857	0.805906	1.06757	1.49881	1.4618	1.15262	1.15322	1.1359	1.82019	1.91486	1.41252	1.38423	1.44973	1.83759	1.80712	1.36551	1.45254	1.62287	2.21554	2.08124	1.58706	1.59823
575.6	0.79462	0.799289	0.794852	0.799751	0.803084	1.0629	1.49201	1.45547	1.14824	1.14883	1.13089	1.81167	1.9059	1.40597	1.37852	1.44305	1.8289	1.79855	1.35995	1.44597	1.61508	2.20489	2.07046	1.58025	1.59117
575.8	0.792231	0.797131	0.792687	0.797324	0.800767	1.05934	1.48652	1.45072	1.14444	1.14552	1.12679	1.80467	1.89876	1.40109	1.3743	1.43739	1.82278	1.79221	1.35569	1.44072	1.60844	2.19663	2.06094	1.57451	1.5855
576	0.789732	0.794462	0.790219	0.794725	0.797943	1.05373	1.47937	1.4436	1.13974	1.14094	1.12197	1.79528	1.88956	1.39487	1.36849	1.43033	1.81467	1.78329	1.35013	1.43429	1.60033	2.18639	2.05105	1.56709	1.57851
576.2	0.787885	0.792082	0.787826	0.792773	0.795861	1.04968	1.47402	1.43786	1.13612	1.13701	1.11793	1.7884	1.88224	1.38964	1.36423	1.42497	1.80821	1.77597	1.34569	1.42944	1.59405	2.17868	2.04265	1.56103	1.57246
576.4	0.784791	0.78973	0.784679	0.790331	0.792796	1.0454	1.46687	1.43203	1.13124	1.1325	1.11264	1.77898	1.87269	1.38367	1.35852	1.41794	1.79877	1.76756	1.33956	1.42291	1.58587	2.16811	2.0319	1.5537	1.56566
576.6	0.78236	0.787968	0.782474	0.788513	0.790404	1.04221	1.46197	1.42789	1.12742	1.12888	1.10866	1.77161	1.86558	1.37896	1.35377	1.41259	1.79094	1.76029	1.33495	1.41779	1.57947	2.15954	2.0231	1.54749	1.55968
576.8	0.779748	0.784907	0.779632	0.785171	0.787401	1.03688	1.45411	1.42003	1.12233	1.1235	1.10231	1.76196	1.85475	1.37179	1.34685	1.40446	1.78127	1.74988	1.32787	1.41045	1.57	2.14665	2.01143	1.53898	1.55092
577	0.776956	0.782456	0.776824	0.782311	0.784821	1.03234	1.44777	1.41338	1.11789	1.1192	1.09746	1.7519	1.8449	1.3654	1.34072	1.39768	1.77199	1.74019	1.32211	1.40439	1.56163	2.13609	2.0012	1.53224	1.5435
577.2	0.77464	0.780579	0.774452	0.779925	0.782417	1.02862	1.44243	1.40759	1.1142	1.1157	1.09345	1.74468	1.83723	1.36029	1.33613	1.39221	1.76508	1.73257	1.31711	1.3996	1.55521	2.12744	1.99254	1.5265	1.53805
577.4	0.771853	0.777297	0.771653	0.777222	0.779575	1.02426	1.43677	1.40149	1.10957	1.11131	1.08827	1.73523	1.82918	1.35419	1.32995	1.38588	1.75668	1.72501	1.3114	1.39331	1.5478	2.11732	1.98213	1.51906	1.53111
577.6	0.769609	0.774327	0.76944	0.775176	0.777404	1.02036	1.43247	1.39646	1.10578	1.10783	1.0839	1.72745	1.82283	1.3495	1.32511	1.38058	1.75056	1.71823	1.30666	1.38827	1.54182	2.10915	1.97345	1.51345	1.5258
577.8	0.767117	0.771183	0.766684	0.772422	0.774268	1.0151	1.4263	1.39005	1.10098	1.10363	1.0785	1.71853	1.81215	1.34285	1.31899	1.37309	1.74261	1.70963	1.30113	1.38166	1.5336	2.09847	1.96395	1.5065	1.51899
578	0.76485	0.769096	0.764715	0.77043	0.772155	1.01096	1.42134	1.3853	1.09704	1.09981	1.07444	1.71197	1.80459	1.33796	1.31408	1.36706	1.73665	1.70259	1.29679	1.37656	1.52703	2.08984	1.95605	1.50102	1.51304
578.2	0.761328	0.765499	0.760869	0.766989	0.768775	1.00538	1.41496	1.37719	1.09107	1.09434	1.06823	1.70149	1.79261	1.33116	1.30638	1.35886	1.72589	1.69246	1.28967	1.3693	1.51771	2.07561	1.94374	1.49268	1.50439
578.4	0.758902	0.762617	0.757742	0.764239	0.765815	1.00044	1.40951	1.37057	1.08649	1.08987	1.06326	1.69313	1.78324	1.32549	1.30046	1.35222	1.71775	1.6837	1.28365	1.36324	1.51012	2.06489	1.93386	1.48532	1.49738
578.6	0.756965	0.760296	0.755569	0.762118	0.763617	0.996572	1.4047	1.36542	1.0828	1.08648	1.05904	1.68737	1.77572	1.32119	1.29593	1.34674	1.71148	1.67692	1.27899	1.35818	1.50392	2.05754	1.9257	1.47907	1.49177
578.8	0.754392	0.757554	0.752292	0.759431	0.760963	0.992072	1.39809	1.359	1.07851	1.08238	1.05417	1.67853	1.76631	1.31511	1.28976	1.34063	1.70247	1.66751	1.27303	1.35192	1.49553	2.0465	1.91578	1.47183	1.48481
579	0.752351	0.755179	0.749672	0.757375	0.758746	0.988585	1.39291	1.35399	1.07451	1.07884	1.04961	1.67129	1.75951	1.31013	1.28492	1.33518	1.69581	1.66066	1.2683	1.34696	1.48963	2.03767	1.90758	1.46607	1.47918
579.2	0.749574	0.752254	0.746562	0.754711	0.755874	0.983754	1.38563	1.34756	1.06987	1.07444	1.04377	1.6632	1.75056	1.30386	1.279	1.32904	1.68689	1.65163	1.26233	1.34074	1.48191	2.02717	1.89879	1.45896	1.47186
579.4	0.746983	0.75006	0.744287	0.752486	0.753536	0.980528	1.38083	1.34281	1.06626	1.07105	1.03926	1.65648	1.74328	1.29904	1.27435	1.32423	1.67986	1.64455	1.25781	1.33561	1.47626	2.01867	1.8911	1.45348	1.46567
579.6	0.744184	0.747669	0.741105	0.749195	0.750629	0.975894	1.37496	1.33742	1.06137	1.0667	1.0343	1.6482	1.73452	1.29281	1.26821	1.3177	1.67158	1.6364	1.25225	1.32954	1.46882	2.00808	1.88096	1.44638	1.45887
579.8	0.742068	0.745882	0.738921	0.746821	0.748227	0.97164	1.36989	1.33176	1.05766	1.06301	1.03012	1.64206	1.72818	1.28821	1.26336	1.31247	1.66456	1.62943	1.2476	1.3246	1.46297	1.99981	1.8733	1.44069	1.45353
580	0.738876	0.742265	0.735987	0.743185	0.745051	0.96619	1.36199	1.32465	1.05271	1.05693	1.02466	1.63287	1.71796	1.28033	1.2563	1.30417	1.65537	1.62031	1.24041	1.31733	1.45442	1.98773	1.86222	1.43183	1.44564
580.2	0.735975	0.739188	0.732955	0.740695	0.742263	0.96177	1.35567	1.3179	1.04771	1.05202	1.01889	1.62421	1.70907	1.27405	1.25056	1.29761	1.6466	1.61231	1.23436	1.311	1.44768	1.97752	1.85169	1.42518	1.43895
580.4	0.733713	0.736272	0.730791	0.738455	0.740031	0.957953	1.3507	1.3129	1.04345	1.04824	1.01458	1.61823	1.70257	1.26925	1.2459	1.29199	1.64008	1.60593	1.22961	1.30601	1.44209	1.96891	1.84378	1.41985	1.43333
580.6	0.731051	0.73384	0.727307	0.73538	0.737376	0.954433	1.34379	1.30747	1.03877	1.0437	1.00921	1.61077	1.69275	1.26359	1.2404	1.28522	1.6318	1.59751	1.22376	1.29993	1.43478	1.95822	1.83359	1.41323	1.42608
580.8	0.728713	0.731619	0.724604	0.733106	0.735106	0.95087	1.33781	1.30252	1.03517	1.03997	1.00492	1.60502	1.68556	1.25891	1.2359	1.2797	1.62549	1.59057	1.21907	1.29499	1.42847	1.94936	1.82581	1.40771	1.42048
581	0.725993	0.729172	0.721679	0.729999	0.732308	0.946943	1.33096	1.29617	1.03091	1.03555	0.999366	1.59765	1.67662	1.2532	1.23047	1.27333	1.61686	1.58266	1.21306	1.289	1.42158	1.93926	1.8158	1.40058	1.41332
581.2	0.723663	0.726765	0.7192	0.727402	0.730075	0.943829	1.32561	1.2918	1.0277	1.03178	0.995034	1.59067	1.67053	1.24889	1.22598	1.26869	1.61049	1.57574	1.20846	1.28417	1.41617	1.93136	1.80775	1.39491	1.4076
581.4	0.720543	0.723089	0.715667	0.723984	0.726416	0.937801	1.31844	1.2837	1.02251	1.02629	0.989433	1.5805	1.66039	1.2417	1.21934	1.26213	1.60078	1.56672	1.20188	1.27688	1.40801	1.91938	1.79708	1.38687	1.39952
581.6	0.717347	0.720238	0.712899	0.721056	0.723641	0.933164	1.31196	1.27765	1.01788	1.02205	0.985132	1.57221	1.65274	1.23599	1.21403	1.25605	1.593	1.55831	1.19671	1.27104	1.40095	1.90953	1.78793	1.38	1.39261
581.8	0.714825	0.718184	0.710866	0.718557	0.721543	0.929566	1.30615	1.27233	1.01398	1.01836	0.981402	1.56516	1.64702	1.23166	1.2094	1.25101	1.58677	1.55146	1.19253	1.26599	1.39515	1.90226	1.78034	1.37479	1.38695
582	0.712582	0.71578	0.707557	0.715336	0.718474	0.925653	1.30025	1.26672	1.0092	1.01404	0.976448	1.55671	1.63934	1.22538	1.20369	1.24496	1.57794	1.54359	1.18682	1.26001	1.3877	1.89208	1.77033	1.36766	1.37971
582.2	0.710724	0.713918	0.705569	0.712799	0.716148	0.922732	1.2953	1.26191	1.0054	1.01032	0.972285	1.54984	1.63326	1.2206	1.19938	1.23951	1.57038	1.53763	1.18236	1.25519	1.38191	1.88427	1.76318	1.362	1.37371
582.4	0.707602	0.711672	0.702772	0.709664	0.713636	0.919041	1.29003	1.25685	1.00067	1.0055	0.967611	1.54312	1.62337	1.21502	1.19387	1.23379	1.56232	1.52951	1.17693	1.24922	1.37509	1.87343	1.75406	1.35495	1.3671
582.6	0.70536	0.709805	0.700457	0.707224	0.711464	0.915918	1.2851	1.25255	0.997047	1.00179	0.964186	1.53761	1.61596	1.2106	1.18929	1.22847	1.55537	1.52318	1.17244	1.24434	1.37036	1.86514	1.74589	1.34919	1.36215
582.8	0.702271	0.705666	0.697634	0.704226	0.708266	0.910967	1.27728	1.2455	0.991433	0.99618	0.957846	1.52859	1.60631	1.20383	1.1826	1.22125	1.54519	1.51381	1.16539	1.23737	1.36228	1.85496	1.73439	1.34052	1.35372
583	0.699087	0.702559	0.694234	0.70143	0.705645	0.906899	1.27103	1.24029	0.987005	0.992072	0.952381	1.5195	1.59684	1.19742	1.17717	1.21462	1.53655	1.50658	1.15995	1.23123	1.35541	1.84478	1.72491	1.33373	1.34669
583.2	0.696927	0.700465	0.691782	0.698942	0.703527	0.903441	1.26584	1.2355	0.983597	0.98844	0.948063	1.51184	1.58971	1.19281	1.17276	1.20939	1.52966	1.49975	1.15551	1.22663	1.34974	1.83656	1.71719	1.3285	1.34107
583.4	0.694328	0.698034	0.68869	0.696037	0.700678	0.899597	1.25953	1.22912	0.979242	0.984221	0.943668	1.50428	1.58133	1.18719	1.16753	1.20305	1.52057	1.49211	1.15005	1.22049	1.34273	1.82659	1.70721	1.32171	1.33395
583.6	0.691992	0.695927	0.686774	0.693531	0.698305	0.895743	1.25481	1.22365	0.975834	0.980882	0.940245	1.49838	1.57479	1.18287	1.16354	1.19783	1.51368	1.48588	1.14575	1.21585	1.33684	1.8189	1.69946	1.31616	1.32838
583.8	0.68956	0.693697	0.684486	0.691004	0.695101	0.891685	1.24837	1.21834	0.971444	0.976348	0.936011	1.49027	1.56698	1.17721	1.15841	1.19217	1.50546	1.47881	1.14078	1.20969	1.32989	1.80889	1.69078	1.3092	1.32223
584	0.687346	0.691267	0.682661	0.688735	0.692587	0.887491	1.24338	1.21348	0.968115	0.973061	0.931933	1.48364	1.56069	1.1725	1.15437	1.18737	1.49888	1.4726	1.13669	1.205	1.32454	1.80161	1.68405	1.30378	1.31729
584.2	0.683986	0.687928	0.679711	0.685588	0.689473	0.882624	1.23632	1.20768	0.963309	0.96788	0.926508	1.47402	1.55071	1.16555	1.14772	1.18002	1.48934	1.4633	1.13052	1.19791	1.31648	1.78984	1.6743	1.29577	1.30951
584.4	0.682405	0.68633	0.678118	0.683902	0.687881	0.880676	1.23206	1.20373	0.960605	0.965395	0.923369	1.46935	1.54562	1.16223	1.14434	1.17588	1.48454	1.45862	1.12711	1.19457	1.31247	1.78403	1.66833	1.29164	1.3054
584.6	0.679359	0.682542	0.67476	0.680812	0.684778	0.876501	1.22531	1.19638	0.955137	0.960506	0.917731	1.46034	1.53483	1.15491	1.13789	1.16799	1.47481	1.45108	1.12071	1.1877	1.30287	1.77325	1.65666	1.28378	1.29737
584.8	0.676732	0.679829	0.671579	0.677968	0.682142	0.87299	1.2191	1.19029	0.950409	0.956061	0.91284	1.45213	1.52714	1.14931	1.13267	1.1619	1.46742	1.44357	1.11502	1.18168	1.29628	1.76323	1.64757	1.27731	1.29088
585	0.674769	0.677527	0.66917	0.675949	0.67997	0.870069	1.21419	1.18574	0.946678	0.952416	0.90861	1.44624	1.52031	1.14476	1.12856	1.15658	1.46131	1.43747	1.11032	1.17705	1.29111	1.7557	1.63972	1.27244	1.28589
585.2	0.671913	0.674761	0.666843	0.673155	0.676904	0.865853	1.20802	1.17987	0.942717	0.948171	0.903654	1.43988	1.51212	1.13883	1.12303	1.15107	1.45411	1.42961	1.10466	1.1711	1.28397	1.74544	1.63116	1.266	1.28002
585.4	0.669535	0.673191	0.665392	0.671181	0.674754	0.862304	1.2031	1.17527	0.939654	0.944757	0.899587	1.4334	1.50628	1.1345	1.1185	1.14671	1.44853	1.42368	1.10032	1.16662	1.27849	1.73785	1.6243	1.2612	1.27517
585.6	0.666131	0.669488	0.66246	0.668296	0.671349	0.856781	1.19499	1.16825	0.934565	0.939292	0.894612	1.42379	1.49594	1.12829	1.1119	1.13948	1.44099	1.41407	1.0937	1.15994	1.27104	1.72661	1.61408	1.25341	1.26789
585.8	0.664459	0.667331	0.660878	0.666399	0.669759	0.854436	1.19096	1.16505	0.931878	0.936871	0.891642	1.41766	1.49147	1.12498	1.10859	1.13679	1.4369	1.41043	1.09065	1.15695	1.26672	1.72122	1.60844	1.24974	1.26398
586	0.66076	0.664626	0.657551	0.66315	0.666423	0.849181	1.18411	1.15744	0.92697	0.931498	0.886038	1.40847	1.48209	1.1182	1.10225	1.13056	1.42698	1.40126	1.08434	1.14979	1.2586	1.71063	1.5989	1.24244	1.25668
586.2	0.65835	0.662064	0.655148	0.660468	0.663489	0.845102	1.1785	1.15201	0.922618	0.927469	0.880604	1.40129	1.4744	1.11283	1.09724	1.1243	1.41996	1.39358	1.07913	1.14411	1.25182	1.70199	1.59123	1.23662	1.25045
586.4	0.656601	0.659593	0.653401	0.658314	0.661154	0.841884	1.17364	1.14772	0.919212	0.92405	0.877054	1.39636	1.46847	1.10856	1.09314	1.11974	1.41522	1.3866	1.07496	1.1396	1.24611	1.69506	1.58471	1.23176	1.24528
586.6	0.654016	0.65682	0.650724	0.655826	0.658552	0.837756	1.16808	1.14236	0.914483	0.919812	0.872563	1.38869	1.46029	1.10328	1.08755	1.11427	1.40824	1.37977	1.06948	1.13369	1.23876	1.68629	1.57651	1.22556	1.23932
586.8	0.651871	0.654873	0.648775	0.653674	0.656534	0.834786	1.16446	1.13799	0.910688	0.916547	0.868937	1.38317	1.45383	1.09879	1.08308	1.11038	1.40271	1.37361	1.06532	1.12939	1.23285	1.67881	1.57137	1.22036	1.23427
587	0.648892	0.651108	0.645395	0.649938	0.653553	0.830023	1.15813	1.13198	0.905577	0.911397	0.862498	1.374	1.44402	1.09274	1.07651	1.10361	1.39537	1.36491	1.05909	1.12266	1.22481	1.66844	1.56275	1.21275	1.22693
587.2	0.647355	0.649714	0.64339	0.648314	0.652039	0.827846	1.15446	1.12883	0.902823	0.908747	0.859797	1.36993	1.43909	1.08922	1.07326	1.09966	1.39118	1.36064	1.05606	1.11917	1.22037	1.66401	1.55688	1.20912	1.2232
587.4	0.644	0.646308	0.640304	0.645408	0.648902	0.823396	1.14776	1.12143	0.897659	0.903707	0.854234	1.36136	1.43116	1.08282	1.06659	1.09324	1.38171	1.35227	1.04975	1.11274	1.21281	1.65185	1.54616	1.20198	1.21556
587.6	0.640802	0.644039	0.637714	0.642656	0.645841	0.819738	1.1416	1.1164	0.893029	0.899446	0.850238	1.3538	1.42277	1.07757	1.06148	1.08743	1.37482	1.34517	1.04429	1.10698	1.2063	1.6425	1.53795	1.19633	1.20963
587.8	0.638701	0.64227	0.635664	0.640519	0.643536	0.816269	1.13674	1.11249	0.889823	0.896011	0.846804	1.34773	1.4165	1.07348	1.05741	1.08269	1.36908	1.33918	1.04033	1.10243	1.20126	1.63493	1.53151	1.19161	1.20504
588	0.636111	0.639649	0.632606	0.63775	0.640677	0.81146	1.131	1.10745	0.885902	0.891582	0.84223	1.34112	1.40797	1.06829	1.05229	1.07759	1.36136	1.33135	1.03546	1.09691	1.19541	1.62663	1.52299	1.18529	1.1991
588.2	0.6339	0.637742	0.630546	0.635496	0.638424	0.807827	1.12662	1.10303	0.882697	0.887913	0.838749	1.33599	1.40193	1.06375	1.04783	1.07343	1.35521	1.32566	1.03135	1.09271	1.19037	1.61931	1.51624	1.18033	1.194
588.4	0.631123	0.634961	0.627984	0.632346	0.635408	0.80315	1.12007	1.09704	0.877475	0.883274	0.833972	1.32671	1.392	1.05767	1.04109	1.06744	1.3462	1.31732	1.02543	1.08626	1.18303	1.60795	1.50631	1.17268	1.18615
588.6	0.629999	0.63312	0.625802	0.630844	0.634048	0.80088	1.11649	1.09479	0.874951	0.880726	0.831191	1.32258	1.38781	1.05427	1.03811	1.06423	1.34247	1.31305	1.02224	1.08294	1.17866	1.60248	1.50141	1.1691	1.1827
588.8	0.627199	0.629211	0.622247	0.627557	0.630639	0.797169	1.10961	1.08871	0.869445	0.875605	0.825916	1.31453	1.37888	1.04843	1.03177	1.05747	1.33304	1.30453	1.01621	1.0764	1.17129	1.59228	1.49137	1.16155	1.17554
589	0.624481	0.626642	0.61938	0.6251	0.627949	0.794029	1.10458	1.08275	0.865828	0.871572	0.822098	1.30809	1.37149	1.04303	1.02669	1.05115	1.32546	1.29838	1.01155	1.07051	1.16381	1.58368	1.48252	1.15589	1.16941
589.2	0.622076	0.624905	0.617404	0.623277	0.625701	0.790896	1.1006	1.07849	0.862573	0.86835	0.818703	1.30306	1.36647	1.03894	1.02262	1.04613	1.31993	1.29281	1.00758	1.0663	1.15853	1.57701	1.47576	1.15134	1.16444
589.4	0.619204	0.622553	0.614598	0.620874	0.622974	0.787063	1.09495	1.07342	0.858494	0.864369	0.814342	1.29581	1.35937	1.03377	1.01739	1.04029	1.31351	1.28635	1.00206	1.0611	1.15185	1.56847	1.46863	1.14509	1.15854
589.6	0.616687	0.620077	0.612769	0.618549	0.620947	0.784097	1.09049	1.06868	0.854876	0.861068	0.811308	1.28996	1.35387	1.02944	1.01328	1.03575	1.30789	1.28086	0.997694	1.05689	1.14644	1.56115	1.46313	1.14019	1.15355
589.8	0.61325	0.616626	0.609755	0.615244	0.617866	0.779719	1.08409	1.06142	0.850121	0.85618	0.805228	1.28043	1.34463	1.02355	1.00743	1.0297	1.29939	1.27243	0.991775	1.05086	1.14014	1.55106	1.4528	1.13259	1.14626
590	0.611967	0.614889	0.607994	0.61373	0.61605	0.777158	1.08108	1.05813	0.847692	0.853566	0.802706	1.27598	1.34033	1.02034	1.00487	1.02624	1.29536	1.2684	0.988784	1.04757	1.13691	1.5464	1.44703	1.12912	1.14263
590.2	0.608826	0.611854	0.605486	0.61047	0.61235	0.772347	1.07401	1.05206	0.84303	0.848995	0.797638	1.26712	1.33259	1.014	0.998764	1.01974	1.28693	1.25974	0.982333	1.04126	1.12986	1.53664	1.43641	1.12166	1.13556
590.4	0.606092	0.609677	0.602765	0.607954	0.609733	0.768622	1.06867	1.04702	0.838551	0.844828	0.793689	1.26046	1.3259	1.00874	0.993536	1.01433	1.27954	1.25302	0.977471	1.03579	1.12361	1.52735	1.42818	1.11541	1.12959
590.6	0.604175	0.60747	0.601125	0.60577	0.607593	0.765583	1.06419	1.04277	0.835251	0.841275	0.790264	1.25526	1.32049	1.00463	0.989603	1.01045	1.27414	1.24753	0.973483	1.0314	1.11869	1.51999	1.42215	1.1104	1.12452
590.8	0.602173	0.60415	0.598308	0.602818	0.605069	0.76138	1.05998	1.0373	0.830939	0.837168	0.786492	1.24873	1.31343	0.999352	0.984501	1.00475	1.2672	1.24037	0.968591	1.02643	1.11275	1.51291	1.41444	1.10409	1.11861
591	0.600581	0.601682	0.595979	0.600588	0.603093	0.758191	1.05696	1.03263	0.827829	0.834089	0.78243	1.24421	1.30805	0.995028	0.980191	1.00064	1.26099	1.23475	0.964935	1.0223	1.1079	1.50706	1.40782	1.09927	1.11382
591.2	0.597878	0.598613	0.593354	0.597157	0.599591	0.753812	1.05052	1.02598	0.822924	0.829073	0.777316	1.23594	1.30022	0.988604	0.974337	0.994359	1.25282	1.22623	0.958703	1.01578	1.10003	1.49576	1.39723	1.09214	1.10664
591.4	0.594756	0.595826	0.591356	0.594705	0.596965	0.750258	1.04452	1.02089	0.818886	0.825236	0.772737	1.22935	1.29339	0.983895	0.969506	0.988849	1.24572	1.21919	0.953745	1.01052	1.09345	1.4868	1.38982	1.08607	1.10106
591.6	0.592432	0.593916	0.589189	0.592711	0.594861	0.747665	1.04033	1.01659	0.815568	0.82231	0.769896	1.2241	1.28783	0.9797	0.965578	0.984188	1.24015	1.21342	0.949651	1.00622	1.08826	1.48023	1.38372	1.08149	1.09658
591.8	0.589919	0.591073	0.586481	0.590257	0.592279	0.743	1.03571	1.01092	0.811767	0.818104	0.765296	1.21738	1.28134	0.974649	0.960585	0.978803	1.23439	1.20642	0.944816	1.00117	1.08248	1.47273	1.37652	1.07576	1.09047
592	0.587527	0.588992	0.584688	0.588039	0.590185	0.739398	1.03268	1.00603	0.808448	0.814849	0.762004	1.21179	1.27531	0.970305	0.95663	0.974579	1.22928	1.20095	0.941097	0.997036	1.07772	1.46596	1.37053	1.07096	1.08544
592.2	0.584621	0.586424	0.582241	0.585373	0.587488	0.735077	1.0269	1.00111	0.804278	0.811062	0.758615	1.20598	1.26849	0.965142	0.951882	0.969212	1.22273	1.19402	0.936019	0.991999	1.07188	1.45743	1.36282	1.06529	1.07997
592.4	0.582789	0.584097	0.580191	0.58324	0.585303	0.731626	1.02227	0.997385	0.800706	0.807869	0.755432	1.20095	1.26312	0.961084	0.948005	0.965001	1.21783	1.18833	0.932021	0.987962	1.06803	1.45104	1.35751	1.06075	1.07536
592.6	0.579756	0.58119	0.576851	0.579656	0.582039	0.727276	1.01633	0.989207	0.795828	0.803148	0.750553	1.19335	1.25376	0.954671	0.942138	0.958606	1.20904	1.17999	0.926114	0.981727	1.06099	1.44027	1.3481	1.05385	1.06809
592.8	0.577546	0.579166	0.574	0.577516	0.579203	0.723724	1.01188	0.9836	0.791863	0.799022	0.746477	1.18702	1.24561	0.949562	0.937308	0.953221	1.20195	1.17334	0.92174	0.976403	1.05482	1.4312	1.3391	1.04807	1.06237
593	0.575753	0.577525	0.571414	0.575464	0.577038	0.720547	1.00772	0.979695	0.788718	0.795746	0.743656	1.18188	1.23993	0.945582	0.933141	0.948517	1.19632	1.16776	0.917949	0.972087	1.0495	1.42508	1.33262	1.04354	1.05776
593.2	0.573352	0.575179	0.568262	0.57261	0.574485	0.716894	1.00233	0.97496	0.784563	0.79176	0.739574	1.17671	1.23307	0.940425	0.928143	0.943527	1.1895	1.16139	0.912864	0.966875	1.04392	1.41637	1.32521	1.03775	1.05203
593.4	0.571313	0.572812	0.565609	0.570561	0.572608	0.71347	0.997849	0.97081	0.781257	0.788396	0.73574	1.17138	1.22809	0.936507	0.924182	0.93902	1.18441	1.15624	0.908826	0.962599	1.03899	1.40914	1.31998	1.03279	1.04739
593.6	0.568094	0.570109	0.56229	0.567364	0.569168	0.70931	0.99135	0.963604	0.776682	0.783037	0.730824	1.16309	1.21964	0.930771	0.918521	0.933499	1.17637	1.14914	0.903012	0.956609	1.03253	1.40054	1.31091	1.02588	1.04041
593.8	0.566031	0.568348	0.560492	0.56592	0.56767	0.706814	0.98867	0.960876	0.774003	0.780923	0.728189	1.15989	1.2149	0.927788	0.915592	0.929879	1.17245	1.14487	0.900131	0.953634	1.02919	1.39602	1.30585	1.02265	1.03686
594	0.562463	0.566081	0.557206	0.562616	0.564515	0.702875	0.981643	0.9549	0.769559	0.776381	0.722927	1.15102	1.20733	0.921936	0.909593	0.923664	1.16509	1.13772	0.894161	0.947561	1.02198	1.38639	1.29747	1.01564	1.03025
594.2	0.559572	0.56413	0.55468	0.560461	0.562071	0.699344	0.975775	0.950884	0.765454	0.772269	0.719672	1.14346	1.19993	0.91713	0.904697	0.918523	1.15806	1.13189	0.888979	0.942194	1.01661	1.37817	1.28946	1.00974	1.02425
594.4	0.557235	0.562048	0.552485	0.558477	0.560015	0.696377	0.97198	0.947481	0.762006	0.769132	0.716799	1.13789	1.19474	0.913231	0.900613	0.914824	1.1521	1.12638	0.884895	0.938175	1.0121	1.37194	1.28435	1.00512	1.01949
594.6	0.554769	0.559578	0.549865	0.555788	0.557524	0.692563	0.966488	0.942389	0.758179	0.765362	0.713517	1.13085	1.18833	0.907969	0.895727	0.909779	1.1469	1.12008	0.87991	0.933219	1.00649	1.36526	1.27716	0.999797	1.01391
594.8	0.553095	0.557375	0.547221	0.553536	0.555608	0.689661	0.962983	0.938112	0.755007	0.762204	0.710747	1.12579	1.18292	0.903828	0.891973	0.905593	1.14236	1.11534	0.875988	0.929169	1.00174	1.35986	1.27077	0.995404	1.00951
595	0.549811	0.553959	0.544226	0.550238	0.552206	0.686012	0.956817	0.931323	0.750279	0.757039	0.705574	1.11765	1.17379	0.898152	0.886075	0.899382	1.13464	1.10891	0.870238	0.923053	0.995948	1.34901	1.26231	0.988694	1.00275
595.2	0.547894	0.552427	0.542806	0.548825	0.550681	0.684227	0.952929	0.928115	0.747759	0.754746	0.703046	1.11369	1.16973	0.895196	0.883204	0.895822	1.13022	1.10549	0.867001	0.919885	0.992357	1.34419	1.25789	0.985475	0.999203
595.4	0.545108	0.548968	0.539309	0.54512	0.54758	0.680604	0.946611	0.921674	0.74307	0.749905	0.697899	1.10617	1.16258	0.889354	0.877244	0.889421	1.12289	1.09816	0.861731	0.9137	0.985845	1.33529	1.24872	0.978639	0.992572
595.6	0.542693	0.546711	0.536827	0.542247	0.545174	0.677385	0.941484	0.916492	0.739095	0.745934	0.693312	1.09954	1.15552	0.88472	0.872425	0.884426	1.1164	1.09164	0.857171	0.90826	0.979115	1.32742	1.2417	0.972937	0.98685
595.8	0.540838	0.544585	0.534567	0.540077	0.543156	0.674661	0.937231	0.913005	0.735965	0.742553	0.690302	1.09411	1.15042	0.880708	0.868731	0.879951	1.11129	1.08646	0.853599	0.904108	0.974721	1.32061	1.23618	0.968383	0.982302
596	0.538011	0.541506	0.532246	0.537253	0.540334	0.670876	0.932574	0.90896	0.732193	0.738443	0.686633	1.08693	1.14367	0.875735	0.863781	0.87586	1.10625	1.08036	0.848894	0.899057	0.969094	1.31305	1.22806	0.962547	0.976431
596.2	0.535776	0.53921	0.530647	0.534794	0.538067	0.667657	0.929139	0.905767	0.729236	0.735339	0.68372	1.08204	1.13893	0.871999	0.860022	0.87217	1.10138	1.07532	0.845208	0.895103	0.964813	1.30748	1.22212	0.958135	0.971913
596.4	0.532635	0.535813	0.527688	0.531869	0.53491	0.664011	0.923671	0.899364	0.725084	0.730828	0.679204	1.0749	1.13125	0.866353	0.854514	0.866469	1.09406	1.06864	0.839268	0.888895	0.957677	1.29791	1.2144	0.9518	0.965195
596.6	0.529719	0.533079	0.525304	0.529376	0.532181	0.660542	0.918019	0.894137	0.721606	0.727195	0.675499	1.069	1.12425	0.86126	0.849568	0.861689	1.0877	1.06228	0.834882	0.883661	0.951759	1.29107	1.20606	0.946723	0.959859
596.8	0.527518	0.530827	0.523791	0.527239	0.53028	0.657923	0.913706	0.889967	0.718832	0.724429	0.672756	1.06401	1.11795	0.857209	0.845528	0.857576	1.08294	1.05716	0.831118	0.879641	0.947131	1.28484	1.19962	0.942754	0.955666
597	0.52512	0.528569	0.521124	0.524765	0.527794	0.65455	0.908907	0.885861	0.714941	0.720766	0.669015	1.05725	1.11112	0.852472	0.840907	0.852806	1.07644	1.05004	0.82661	0.874879	0.941657	1.27608	1.19232	0.937685	0.950011
597.2	0.523448	0.526806	0.519306	0.522743	0.525674	0.651695	0.90551	0.882045	0.711872	0.717672	0.665831	1.05149	1.10544	0.848875	0.837224	0.849035	1.07091	1.04506	0.823089	0.870777	0.937203	1.26915	1.18641	0.933451	0.945488
597.4	0.520239	0.522893	0.516993	0.519377	0.52242	0.646977	0.899894	0.875367	0.707171	0.712907	0.661458	1.04436	1.09804	0.843154	0.831593	0.843697	1.06464	1.03654	0.817012	0.865022	0.931042	1.25998	1.17851	0.927255	0.938957
597.6	0.518847	0.521227	0.515456	0.517743	0.52085	0.644896	0.896755	0.87172	0.704935	0.710431	0.65904	1.04064	1.09382	0.840225	0.828681	0.84096	1.06139	1.03312	0.81424	0.862065	0.927023	1.25575	1.17468	0.923961	0.935774
597.8	0.515911	0.518423	0.511851	0.514665	0.517909	0.640952	0.891299	0.865953	0.70008	0.705558	0.653884	1.03404	1.08551	0.835138	0.823094	0.834731	1.05334	1.02667	0.808939	0.855852	0.921049	1.24585	1.16654	0.917615	0.929081
598	0.512948	0.516217	0.509274	0.512015	0.515316	0.637533	0.886062	0.861503	0.696384	0.701981	0.650296	1.0277	1.07908	0.830452	0.8185	0.829662	1.04746	1.02066	0.804439	0.850955	0.91558	1.23827	1.15974	0.91218	0.92351
598.2	0.510934	0.514189	0.507242	0.509924	0.513128	0.634073	0.882296	0.857607	0.693527	0.698963	0.647308	1.02281	1.07402	0.826917	0.814653	0.825638	1.0424	1.01506	0.801225	0.846931	0.911449	1.23326	1.15401	0.907763	0.919032
598.4	0.508437	0.51193	0.504605	0.507619	0.510228	0.630325	0.877618	0.853294	0.690035	0.695213	0.643726	1.01687	1.06773	0.821953	0.810605	0.821501	1.0362	1.00935	0.79694	0.84222	0.905902	1.22547	1.14664	0.902468	0.913769
598.6	0.506635	0.509666	0.502573	0.505705	0.507919	0.627309	0.873796	0.849915	0.68731	0.692124	0.640906	1.01193	1.0619	0.818227	0.807169	0.817759	1.03141	1.00435	0.793433	0.838512	0.902119	1.21944	1.14058	0.89831	0.909373
598.8	0.503634	0.506971	0.500181	0.503217	0.504727	0.622882	0.868617	0.844329	0.683066	0.687786	0.636673	1.00427	1.05479	0.812669	0.801792	0.812274	1.02346	0.997232	0.787693	0.833039	0.896071	1.21075	1.13211	0.89215	0.903175
599	0.502045	0.505735	0.498802	0.501837	0.503218	0.620801	0.864856	0.841467	0.680614	0.685755	0.634444	1.0016	1.05072	0.810177	0.799071	0.809703	1.01967	0.993946	0.785062	0.830516	0.89305	1.20677	1.12777	0.889137	0.899918
599.2	0.498971	0.502615	0.495745	0.498478	0.500393	0.616581	0.859834	0.834771	0.676414	0.68116	0.63017	0.995552	1.04364	0.805222	0.79379	0.803742	1.01164	0.986435	0.780047	0.825164	0.886587	1.19894	1.11932	0.882526	0.893808
599.4	0.496138	0.500499	0.493028	0.495961	0.498097	0.613373	0.854065	0.828783	0.672563	0.677551	0.626474	0.988995	1.03671	0.800848	0.789228	0.798518	1.00615	0.979647	0.776076	0.820539	0.88094	1.19101	1.11233	0.877206	0.888924
599.6	0.494119	0.498643	0.491218	0.494015	0.496117	0.610434	0.849576	0.824581	0.669439	0.674584	0.623579	0.983553	1.03133	0.797752	0.785606	0.794311	1.00195	0.974718	0.772979	0.816831	0.876468	1.18489	1.10678	0.873184	0.884942
599.8	0.491033	0.495806	0.4884	0.490741	0.493211	0.606585	0.843639	0.819898	0.664943	0.670251	0.619437	0.976709	1.02413	0.792221	0.780465	0.788659	0.995422	0.968131	0.76749	0.811358	0.870809	1.17533	1.0991	0.866844	0.878986
600	0.489619	0.494901	0.486901	0.489208	0.491625	0.605186	0.840941	0.817255	0.662694	0.667883	0.617358	0.972661	1.0208	0.78953	0.77792	0.785837	0.992271	0.965425	0.765231	0.808637	0.867366	1.17042	1.09518	0.863704	0.875577
600.2	0.486692	0.491563	0.48361	0.486344	0.488596	0.600644	0.8363	0.811048	0.658211	0.663253	0.612862	0.966091	1.01365	0.784483	0.772825	0.780263	0.98506	0.95826	0.760155	0.802934	0.862205	1.16216	1.0882	0.857245	0.869332
600.4	0.484273	0.488698	0.481224	0.48385	0.486067	0.597706	0.830876	0.806461	0.654775	0.659633	0.609263	0.961528	1.00806	0.779421	0.768652	0.775385	0.980112	0.953093	0.755958	0.798384	0.856571	1.15523	1.08146	0.852361	0.864444
600.6	0.482068	0.486421	0.479032	0.482012	0.484131	0.595446	0.827042	0.802537	0.651951	0.656626	0.606652	0.957997	1.0034	0.775506	0.765209	0.771376	0.975703	0.94862	0.752685	0.794767	0.851966	1.14986	1.07538	0.848194	0.86026
600.8	0.479529	0.484052	0.476377	0.479877	0.481812	0.591908	0.822872	0.797383	0.648328	0.65334	0.603424	0.952207	0.99779	0.771027	0.76079	0.766102	0.970029	0.942976	0.74869	0.790163	0.846359	1.14274	1.0684	0.843213	0.855126
601	0.477273	0.481923	0.47468	0.478119	0.479924	0.58921	0.818716	0.79346	0.645545	0.650619	0.600522	0.947455	0.992748	0.767445	0.757585	0.761982	0.965768	0.938559	0.745435	0.786764	0.842756	1.13638	1.06261	0.839182	0.851073
601.2	0.474493	0.478796	0.471637	0.475104	0.477059	0.585229	0.812595	0.787484	0.641256	0.64643	0.596025	0.940263	0.985194	0.761908	0.752624	0.757191	0.95842	0.930746	0.740697	0.781738	0.836118	1.12871	1.05494	0.833145	0.844958
601.4	0.473118	0.476891	0.470516	0.473578	0.47558	0.583738	0.809426	0.784786	0.639032	0.644079	0.593336	0.937075	0.98262	0.759185	0.750258	0.754664	0.954759	0.92751	0.738036	0.779095	0.832433	1.12402	1.05091	0.830216	0.841845
601.6	0.470607	0.474172	0.467277	0.470254	0.472941	0.579987	0.803923	0.780393	0.635006	0.639906	0.589838	0.930288	0.97595	0.753571	0.745066	0.749118	0.947557	0.920836	0.732676	0.773499	0.826034	1.1155	1.04272	0.823973	0.835752
601.8	0.468067	0.471752	0.464689	0.467799	0.470721	0.576667	0.798967	0.775844	0.631337	0.636317	0.586512	0.924846	0.971033	0.749192	0.740743	0.745077	0.94193	0.915136	0.728474	0.769217	0.820788	1.10838	1.03687	0.81896	0.831073
602	0.466072	0.469581	0.462651	0.465852	0.468823	0.573888	0.794913	0.772241	0.628319	0.633507	0.583239	0.920244	0.966319	0.745791	0.737174	0.741332	0.937379	0.911276	0.724993	0.765463	0.817079	1.10305	1.03228	0.815256	0.827132
602.2	0.463477	0.466239	0.459843	0.462726	0.4659	0.569213	0.79089	0.766936	0.623913	0.629612	0.578492	0.913324	0.959813	0.739977	0.732064	0.73617	0.93046	0.904875	0.720309	0.759737	0.811104	1.09409	1.02462	0.808997	0.821022
602.4	0.462072	0.464948	0.458126	0.461673	0.464277	0.567264	0.787847	0.764741	0.621796	0.627611	0.576043	0.91006	0.956233	0.737206	0.729529	0.733782	0.926264	0.901962	0.717934	0.757085	0.808302	1.09014	1.02119	0.806534	0.818005
602.6	0.459575	0.461831	0.455824	0.459129	0.461351	0.5637	0.783291	0.760541	0.617624	0.623456	0.571844	0.903029	0.949778	0.731948	0.724156	0.728688	0.919127	0.896302	0.712399	0.751242	0.802683	1.0813	1.01494	0.800814	0.812349
602.8	0.457169	0.459341	0.453968	0.456667	0.459098	0.560171	0.77912	0.756703	0.61425	0.62012	0.568162	0.897798	0.944605	0.727188	0.719979	0.724508	0.913083	0.891403	0.707999	0.746943	0.797693	1.07485	1.00859	0.796109	0.807228
603	0.455378	0.457542	0.452239	0.454774	0.457312	0.557599	0.775947	0.753091	0.611636	0.617279	0.565434	0.893302	0.940077	0.723664	0.716433	0.720974	0.907853	0.887783	0.704645	0.743442	0.793814	1.071	1.00347	0.792343	0.803412
603.2	0.453053	0.45563	0.449507	0.452443	0.455003	0.554277	0.772059	0.74859	0.608442	0.613921	0.561345	0.887876	0.934469	0.719333	0.712376	0.716251	0.901835	0.881601	0.700468	0.739114	0.788736	1.06417	0.996408	0.787496	0.798334
603.4	0.451009	0.453731	0.447558	0.450509	0.453064	0.551486	0.768602	0.745487	0.605659	0.611338	0.558291	0.883594	0.930018	0.715856	0.709094	0.712238	0.896519	0.877244	0.697172	0.735608	0.784157	1.05938	0.990847	0.783909	0.794605
603.6	0.448384	0.451136	0.444395	0.447893	0.449945	0.547236	0.763977	0.740662	0.601786	0.6072	0.554427	0.877223	0.923389	0.710828	0.704058	0.707966	0.889138	0.870799	0.691892	0.730656	0.778241	1.05188	0.983502	0.777642	0.788969
603.8	0.446186	0.448808	0.442227	0.445337	0.447624	0.543846	0.759871	0.73639	0.598202	0.603822	0.550476	0.871194	0.91759	0.70691	0.700062	0.704212	0.88356	0.865169	0.687867	0.726641	0.774138	1.04556	0.977765	0.772938	0.784525
604	0.444409	0.446862	0.439941	0.443137	0.445644	0.541124	0.756675	0.733181	0.595614	0.601211	0.547457	0.866991	0.91209	0.70384	0.69695	0.701134	0.879009	0.861013	0.684681	0.723402	0.77109	1.04004	0.972863	0.769316	0.780819
604.2	0.442244	0.444635	0.437846	0.440658	0.443408	0.538287	0.753035	0.729695	0.592365	0.597661	0.544564	0.86198	0.906471	0.699763	0.69295	0.696982	0.873662	0.855762	0.680697	0.718906	0.766494	1.03405	0.966864	0.765007	0.776296
604.4	0.440616	0.442736	0.43633	0.438803	0.441632	0.535941	0.750503	0.726643	0.589847	0.594789	0.541785	0.857699	0.902532	0.696616	0.689895	0.693395	0.869076	0.851535	0.677458	0.715201	0.762996	1.02925	0.961714	0.761475	0.77265
604.6	0.4377	0.440126	0.433732	0.435917	0.438948	0.532192	0.745581	0.722049	0.585877	0.591161	0.538016	0.851428	0.895349	0.691812	0.684934	0.688239	0.862934	0.845932	0.67261	0.710332	0.75757	1.02192	0.953794	0.75592	0.767258
604.8	0.436254	0.438455	0.43257	0.434786	0.437523	0.53035	0.743141	0.719204	0.583622	0.589538	0.535214	0.848207	0.891762	0.689608	0.682649	0.685326	0.859788	0.843118	0.670649	0.707878	0.754747	1.01815	0.950384	0.753432	0.764589
605	0.433265	0.435895	0.429989	0.431935	0.434763	0.526864	0.738123	0.713851	0.57948	0.585619	0.530633	0.842747	0.8836	0.684889	0.677702	0.679736	0.85304	0.837028	0.666077	0.703062	0.749864	1.01078	0.943849	0.747684	0.758823
605.2	0.431156	0.433837	0.427655	0.429768	0.432698	0.524264	0.733742	0.710287	0.576529	0.582107	0.527923	0.838447	0.878478	0.68095	0.673969	0.67546	0.848348	0.832185	0.66247	0.698864	0.744568	1.00433	0.937628	0.743048	0.754244
605.4	0.429637	0.432148	0.425814	0.427896	0.430929	0.522396	0.729738	0.707488	0.574215	0.579245	0.525404	0.834188	0.874293	0.677893	0.671051	0.671813	0.844062	0.827758	0.659437	0.695781	0.740619	0.999289	0.932492	0.739274	0.75069
605.6	0.42686	0.429681	0.423193	0.425115	0.428149	0.519348	0.723898	0.702617	0.570343	0.575161	0.521395	0.827702	0.867308	0.673251	0.666388	0.666934	0.83949	0.821787	0.654645	0.690851	0.735106	0.992032	0.925006	0.734017	0.745522
605.8	0.425318	0.428308	0.421631	0.423643	0.426767	0.517847	0.721481	0.700227	0.568385	0.573103	0.519328	0.82471	0.864235	0.670825	0.664154	0.664132	0.836878	0.818884	0.65243	0.688579	0.732331	0.989664	0.921401	0.731519	0.742752
606	0.423275	0.425633	0.418539	0.420685	0.424135	0.514029	0.715982	0.694431	0.564479	0.569275	0.515334	0.818651	0.856432	0.665751	0.659493	0.659601	0.830453	0.812026	0.648234	0.684235	0.726463	0.982772	0.914649	0.726159	0.737619
606.2	0.421244	0.423082	0.415839	0.41844	0.421759	0.511066	0.711416	0.690768	0.561068	0.566158	0.512728	0.813598	0.850926	0.661966	0.65566	0.655439	0.825898	0.806968	0.644459	0.680079	0.722344	0.975185	0.909114	0.721526	0.732995
606.4	0.419226	0.421001	0.413951	0.41664	0.419941	0.509016	0.707966	0.688315	0.558207	0.563627	0.510633	0.810296	0.846173	0.658828	0.652614	0.652346	0.822547	0.802998	0.641712	0.676812	0.71863	0.969404	0.904655	0.718057	0.729516
606.6	0.41641	0.417592	0.411613	0.413894	0.41728	0.505304	0.702272	0.682932	0.554132	0.559833	0.507143	0.80469	0.840045	0.653951	0.647969	0.648368	0.817834	0.79638	0.637261	0.672104	0.714383	0.962019	0.89845	0.712307	0.72413
606.8	0.415272	0.415833	0.41031	0.412459	0.416033	0.503437	0.69993	0.680502	0.552314	0.557808	0.505192	0.801659	0.83592	0.651726	0.645642	0.645597	0.814813	0.793284	0.634815	0.669728	0.711777	0.957996	0.895237	0.710206	0.721612
607	0.412634	0.413521	0.407591	0.409235	0.413238	0.500298	0.69455	0.676114	0.548576	0.554009	0.501562	0.795105	0.829183	0.647271	0.640677	0.641185	0.808741	0.787332	0.630696	0.664929	0.706771	0.950974	0.888249	0.705612	0.716063
607.2	0.410535	0.411622	0.406275	0.407239	0.411004	0.497299	0.690144	0.672164	0.545667	0.550734	0.49838	0.790282	0.824133	0.643269	0.63698	0.636975	0.804097	0.782662	0.62713	0.661084	0.701891	0.945152	0.883032	0.700656	0.711682
607.4	0.408917	0.409874	0.404808	0.405783	0.409333	0.495115	0.68637	0.668465	0.54286	0.548096	0.495885	0.786448	0.820714	0.640193	0.63403	0.633607	0.800481	0.779299	0.623989	0.657977	0.698055	0.940301	0.878424	0.696987	0.708414
607.6	0.406818	0.408046	0.402481	0.403655	0.407058	0.492242	0.681508	0.664755	0.539838	0.545069	0.493193	0.781587	0.816035	0.636475	0.630055	0.629952	0.79595	0.774679	0.62009	0.65406	0.693712	0.933424	0.873419	0.692235	0.703897
607.8	0.405251	0.406351	0.400589	0.401976	0.405193	0.490197	0.678858	0.661772	0.537213	0.542589	0.4908	0.77841	0.811576	0.633539	0.626901	0.626547	0.792275	0.770954	0.617092	0.650954	0.690292	0.928205	0.869272	0.688373	0.700449
608	0.402622	0.404285	0.397243	0.399615	0.402357	0.486638	0.674584	0.656907	0.533337	0.538319	0.48788	0.772949	0.805331	0.628764	0.622315	0.622396	0.786977	0.764469	0.612601	0.646169	0.685507	0.921257	0.862929	0.683358	0.694813
608.2	0.401455	0.40307	0.396278	0.398332	0.401174	0.484844	0.672038	0.65502	0.531289	0.536341	0.486488	0.769659	0.802107	0.626508	0.620353	0.620366	0.784471	0.761351	0.610235	0.643596	0.682474	0.917218	0.859482	0.680822	0.692318
608.4	0.398713	0.400312	0.393822	0.3954	0.398399	0.481341	0.66709	0.649772	0.527519	0.532582	0.48299	0.762702	0.795498	0.622023	0.615889	0.615566	0.778688	0.754898	0.605404	0.63931	0.67793	0.91032	0.852466	0.675794	0.687746
608.6	0.396387	0.398188	0.391208	0.393203	0.396183	0.478168	0.664044	0.645205	0.524407	0.529653	0.480356	0.75807	0.789406	0.618334	0.612214	0.612061	0.774627	0.749967	0.601452	0.635126	0.673243	0.904057	0.84719	0.671763	0.683415
608.8	0.39461	0.39649	0.388995	0.391443	0.394461	0.475795	0.660931	0.641904	0.522174	0.527373	0.47809	0.753678	0.784907	0.615432	0.609286	0.609481	0.771065	0.746559	0.598288	0.631997	0.669735	0.899486	0.843531	0.668213	0.679958
609	0.391902	0.393933	0.387433	0.388847	0.391655	0.471485	0.656213	0.636611	0.518851	0.523859	0.474749	0.748308	0.778651	0.61065	0.604876	0.605138	0.765654	0.740067	0.594118	0.62745	0.664302	0.891658	0.836706	0.663316	0.674691
609.2	0.39049	0.392766	0.385981	0.387541	0.390418	0.469785	0.65423	0.634092	0.517235	0.521808	0.472695	0.745682	0.776432	0.608655	0.602521	0.603008	0.762591	0.737087	0.591944	0.624984	0.661692	0.888462	0.83331	0.660809	0.672069
609.4	0.387869	0.390531	0.383544	0.385185	0.387923	0.466559	0.649891	0.629746	0.513559	0.518216	0.468508	0.740401	0.770981	0.604617	0.598015	0.598817	0.75739	0.731701	0.587859	0.620064	0.65702	0.881541	0.827425	0.656186	0.666787
609.6	0.385879	0.388173	0.381732	0.383002	0.385923	0.463566	0.645423	0.62589	0.510726	0.515047	0.465503	0.735796	0.766702	0.600945	0.594215	0.595107	0.752029	0.727201	0.583988	0.616397	0.652998	0.876419	0.822175	0.652055	0.662809
609.8	0.384278	0.386336	0.37997	0.381235	0.384285	0.461347	0.641987	0.622878	0.508397	0.512402	0.46329	0.732017	0.763209	0.597779	0.591195	0.591807	0.748405	0.723506	0.580959	0.613359	0.649487	0.872186	0.817494	0.648649	0.659511
610	0.381803	0.384347	0.377825	0.378878	0.381806	0.458575	0.637787	0.61799	0.504829	0.509012	0.459436	0.725587	0.758323	0.593394	0.58691	0.587617	0.742808	0.717724	0.576777	0.608571	0.644478	0.865717	0.810481	0.643691	0.654743
610.2	0.380182	0.382857	0.37622	0.3777	0.380638	0.457131	0.635393	0.615413	0.503198	0.507251	0.457704	0.722519	0.755041	0.59101	0.584772	0.585013	0.740422	0.71517	0.574766	0.606154	0.641934	0.862404	0.806416	0.640907	0.652494
610.4	0.377426	0.380255	0.373629	0.375166	0.378165	0.453646	0.630297	0.610506	0.499339	0.503423	0.45392	0.717909	0.749206	0.586608	0.580506	0.58076	0.734513	0.710439	0.570083	0.601399	0.637007	0.855378	0.800689	0.636498	0.647449
610.6	0.375054	0.378214	0.371072	0.373008	0.376074	0.450396	0.62703	0.606542	0.496512	0.500419	0.450945	0.713149	0.744387	0.582968	0.576612	0.576779	0.729773	0.705363	0.566687	0.597891	0.633161	0.849524	0.796213	0.632491	0.643288
610.8	0.373085	0.376698	0.369757	0.371187	0.374324	0.4484	0.624638	0.603512	0.494038	0.49804	0.448667	0.709123	0.740025	0.579759	0.573662	0.57369	0.726698	0.701772	0.564152	0.594945	0.629678	0.844929	0.791753	0.629508	0.640276
611	0.370503	0.373328	0.366989	0.368588	0.371809	0.444789	0.619131	0.59857	0.490651	0.494714	0.445473	0.703387	0.734254	0.574932	0.569429	0.56949	0.720757	0.695972	0.559862	0.590636	0.625314	0.838989	0.784968	0.625246	0.635216
611.2	0.368997	0.372127	0.366037	0.367149	0.370655	0.443174	0.616604	0.596392	0.488886	0.492972	0.443565	0.700645	0.731342	0.572922	0.567493	0.567671	0.717358	0.693363	0.557717	0.588476	0.622881	0.835411	0.781565	0.62262	0.632761
611.4	0.36664	0.369547	0.363897	0.364748	0.368218	0.441061	0.612034	0.591193	0.48574	0.489714	0.439538	0.695154	0.726615	0.56835	0.563075	0.563082	0.711697	0.688033	0.553471	0.584049	0.618022	0.828785	0.77508	0.618063	0.628096
611.6	0.364435	0.367229	0.361425	0.362872	0.366073	0.438447	0.608032	0.587491	0.482679	0.487016	0.436689	0.691018	0.722142	0.564608	0.559538	0.559854	0.707078	0.683528	0.550373	0.580327	0.61432	0.823597	0.769681	0.614144	0.623797
611.8	0.362619	0.365602	0.359749	0.361246	0.364368	0.436362	0.604677	0.584132	0.480209	0.4847	0.433928	0.687556	0.718112	0.56159	0.556723	0.556868	0.703662	0.680374	0.547765	0.577311	0.611547	0.819942	0.765658	0.610976	0.620628
612	0.360341	0.362551	0.35826	0.35896	0.361917	0.433348	0.6002	0.579838	0.476686	0.481241	0.430695	0.682463	0.713427	0.557101	0.552374	0.552216	0.697495	0.674862	0.544031	0.573055	0.607559	0.812196	0.759049	0.606252	0.616047
612.2	0.359483	0.361475	0.356678	0.357854	0.360771	0.431993	0.598183	0.578071	0.474701	0.479496	0.429183	0.679593	0.71066	0.555189	0.550463	0.550258	0.694825	0.672246	0.54219	0.570941	0.606027	0.80868	0.756129	0.603917	0.613809
612.4	0.356837	0.358591	0.354285	0.35547	0.358503	0.429586	0.593046	0.574242	0.470966	0.475938	0.426659	0.67386	0.705539	0.55123	0.54667	0.545654	0.688702	0.667627	0.537707	0.566649	0.602165	0.802086	0.750859	0.598904	0.609096
612.6	0.354829	0.356124	0.351755	0.353341	0.356622	0.426847	0.589083	0.570512	0.467975	0.473021	0.424468	0.669341	0.700803	0.547584	0.543538	0.542228	0.683888	0.663575	0.534214	0.563063	0.598142	0.796632	0.745794	0.594972	0.605021
612.8	0.353231	0.354381	0.350158	0.351608	0.355028	0.42481	0.586365	0.568044	0.465542	0.470886	0.422403	0.665687	0.697148	0.544691	0.541237	0.539554	0.68039	0.660028	0.531135	0.560272	0.59477	0.792127	0.741381	0.591808	0.601774
613	0.350877	0.352167	0.347628	0.349204	0.35248	0.422104	0.582498	0.562707	0.46236	0.467531	0.41883	0.660613	0.691265	0.540853	0.537385	0.536042	0.675249	0.655323	0.527232	0.556368	0.59	0.786268	0.735235	0.587297	0.5971
613.2	0.349845	0.350919	0.346252	0.348248	0.351162	0.420527	0.580003	0.560433	0.460625	0.465742	0.417066	0.658265	0.687573	0.538731	0.53541	0.533817	0.672725	0.653093	0.525363	0.554143	0.587799	0.783094	0.732146	0.585148	0.59472
613.4	0.347901	0.34834	0.344061	0.346031	0.348733	0.417484	0.575443	0.556925	0.456871	0.462271	0.41356	0.653824	0.681986	0.534666	0.531304	0.529602	0.667152	0.648028	0.521497	0.549968	0.583395	0.776541	0.726868	0.580542	0.589698
613.6	0.346631	0.347481	0.343189	0.34463	0.347536	0.41602	0.573239	0.555175	0.455135	0.460669	0.412018	0.651161	0.679043	0.532523	0.529301	0.527299	0.664368	0.645417	0.519657	0.547973	0.581266	0.773765	0.724134	0.578346	0.587429
613.8	0.344575	0.344995	0.341009	0.342333	0.345009	0.413564	0.568719	0.551066	0.451542	0.457641	0.408957	0.645662	0.674219	0.528591	0.52532	0.523374	0.659961	0.640129	0.515726	0.54367	0.576496	0.768076	0.71823	0.573529	0.582819
614	0.343148	0.343377	0.339204	0.340775	0.343428	0.41133	0.565916	0.548284	0.449338	0.455386	0.40634	0.64236	0.670712	0.526295	0.522785	0.520922	0.655952	0.636591	0.513111	0.540964	0.573242	0.764685	0.71476	0.570535	0.57984
614.2	0.341503	0.342013	0.337343	0.338828	0.341477	0.408395	0.562601	0.544752	0.446594	0.452495	0.403663	0.63785	0.666224	0.523224	0.519513	0.517684	0.651446	0.632231	0.509888	0.537455	0.569027	0.759856	0.710408	0.566688	0.576044
614.4	0.339554	0.339668	0.335168	0.336404	0.33907	0.405964	0.558644	0.540606	0.443323	0.449075	0.40054	0.631559	0.661036	0.519317	0.515503	0.51375	0.646441	0.62798	0.506121	0.533106	0.56434	0.754404	0.706331	0.56216	0.571688
614.6	0.338365	0.338473	0.333795	0.335144	0.337934	0.404044	0.556665	0.538716	0.441668	0.447258	0.398765	0.628113	0.658296	0.517505	0.513511	0.511759	0.644669	0.625385	0.504247	0.530932	0.561949	0.751207	0.70375	0.559865	0.569622
614.8	0.336273	0.336545	0.331215	0.332844	0.335563	0.400848	0.552989	0.534558	0.438458	0.443874	0.395881	0.623149	0.65283	0.513558	0.509507	0.507972	0.638745	0.621055	0.500571	0.527101	0.557581	0.745804	0.697572	0.555406	0.565326
615	0.334857	0.33513	0.329721	0.331187	0.334075	0.39904	0.550341	0.532407	0.436374	0.441643	0.393977	0.61948	0.650082	0.511133	0.507077	0.505619	0.635286	0.617475	0.498018	0.524425	0.55477	0.741462	0.694084	0.552495	0.56255
615.2	0.332968	0.333308	0.327668	0.329084	0.332118	0.396936	0.546288	0.529629	0.433485	0.438828	0.391537	0.61573	0.645797	0.508208	0.504115	0.502538	0.630815	0.61286	0.494888	0.521111	0.55102	0.736974	0.689194	0.548948	0.558981
615.4	0.33061	0.331163	0.324869	0.32668	0.33	0.394007	0.542539	0.525066	0.430526	0.43585	0.388218	0.610478	0.640177	0.504294	0.500253	0.498899	0.62647	0.608766	0.490864	0.51723	0.54604	0.731904	0.683795	0.544658	0.554499
615.6	0.329469	0.330132	0.3238	0.325561	0.328838	0.392245	0.540885	0.52315	0.428865	0.434273	0.386599	0.608289	0.636921	0.502451	0.498348	0.497193	0.624009	0.606272	0.489389	0.515228	0.544048	0.728753	0.680412	0.542651	0.5523
615.8	0.327336	0.328093	0.32188	0.323375	0.326054	0.389608	0.537054	0.519068	0.425767	0.430882	0.382912	0.603798	0.631705	0.498224	0.494545	0.493163	0.620051	0.601335	0.485858	0.511407	0.539044	0.722787	0.67322	0.538676	0.547984
616	0.325889	0.326684	0.320183	0.321879	0.324402	0.387813	0.534398	0.515846	0.423529	0.428607	0.381129	0.600773	0.628011	0.495764	0.491829	0.490529	0.616862	0.598338	0.483633	0.508576	0.536458	0.718677	0.669402	0.53581	0.545316
616.2	0.3243	0.325135	0.318492	0.320039	0.322414	0.385352	0.530922	0.512657	0.420908	0.425746	0.378739	0.596559	0.623928	0.492589	0.488613	0.487056	0.612355	0.594452	0.480901	0.505162	0.533178	0.713596	0.664731	0.532123	0.541788
616.4	0.321784	0.322854	0.316261	0.317749	0.320178	0.382133	0.527255	0.509054	0.417607	0.422726	0.376102	0.591969	0.619293	0.48888	0.484711	0.482942	0.606807	0.589262	0.477156	0.501413	0.528771	0.70784	0.659768	0.527629	0.537675
616.6	0.32046	0.321832	0.315147	0.316434	0.319088	0.380462	0.525211	0.507488	0.416192	0.421215	0.374986	0.589073	0.617151	0.486961	0.483009	0.481049	0.604756	0.586137	0.475077	0.499546	0.526781	0.704954	0.656736	0.525338	0.535487
616.8	0.318591	0.319947	0.312966	0.314306	0.316809	0.377792	0.520962	0.503316	0.413281	0.418188	0.372446	0.584334	0.612366	0.483469	0.479349	0.477465	0.601219	0.581825	0.471019	0.49571	0.52239	0.699404	0.652278	0.520928	0.531335
617	0.317324	0.318615	0.311335	0.312984	0.31525	0.375746	0.518909	0.500687	0.411111	0.41585	0.370474	0.58139	0.609382	0.480861	0.476987	0.475203	0.597903	0.57909	0.468549	0.493351	0.519574	0.695878	0.649044	0.518259	0.52874
617.2	0.315678	0.316526	0.309265	0.311302	0.313339	0.373684	0.516268	0.497328	0.408488	0.413129	0.368393	0.578076	0.605882	0.47788	0.474033	0.472243	0.59367	0.575411	0.465429	0.490194	0.516438	0.69066	0.64505	0.514762	0.525152
617.4	0.313144	0.313673	0.307614	0.309071	0.311204	0.370896	0.512159	0.494489	0.405402	0.41	0.365635	0.573968	0.600979	0.474072	0.470407	0.468649	0.589293	0.571246	0.461779	0.486351	0.512299	0.684514	0.638728	0.510769	0.521155
617.6	0.312087	0.312383	0.306235	0.308052	0.310176	0.369274	0.51065	0.492543	0.403995	0.408296	0.364122	0.572053	0.598458	0.47227	0.468541	0.466229	0.587038	0.568647	0.460183	0.484735	0.510657	0.681542	0.635838	0.508702	0.519241
617.8	0.3098	0.309489	0.304149	0.306028	0.307917	0.36626	0.506268	0.488349	0.400863	0.405206	0.361361	0.568577	0.5942	0.46829	0.464882	0.462435	0.581673	0.564625	0.456379	0.4809	0.50632	0.676176	0.6301	0.504814	0.515025
618	0.30838	0.308083	0.303023	0.304518	0.306478	0.363981	0.503343	0.485822	0.398852	0.403197	0.359318	0.565448	0.590758	0.466005	0.462609	0.459703	0.579073	0.561794	0.453868	0.478399	0.503534	0.671852	0.626965	0.502328	0.512187
618.2	0.306467	0.306239	0.301301	0.302747	0.304619	0.360962	0.500292	0.482913	0.396367	0.40078	0.356825	0.562144	0.586744	0.463038	0.459506	0.456226	0.575655	0.558384	0.45077	0.475286	0.499983	0.666787	0.622631	0.499223	0.508699
618.4	0.304154	0.304103	0.299043	0.300663	0.302404	0.358112	0.497017	0.478608	0.393082	0.397696	0.353783	0.557416	0.58228	0.459144	0.455653	0.452875	0.571496	0.553653	0.447018	0.471744	0.495938	0.661836	0.617812	0.495477	0.504041
618.6	0.303248	0.303125	0.298252	0.299741	0.301247	0.356848	0.495192	0.476592	0.39144	0.396101	0.352246	0.555296	0.580412	0.457404	0.453829	0.450827	0.569044	0.551462	0.4451	0.469818	0.494273	0.65983	0.615591	0.493502	0.501992
618.8	0.301278	0.300918	0.296279	0.297484	0.299017	0.354349	0.491208	0.473612	0.388511	0.393104	0.349584	0.550597	0.575894	0.453964	0.450065	0.447098	0.564362	0.546511	0.44167	0.466038	0.489912	0.654185	0.610913	0.489647	0.498352
619	0.299765	0.299556	0.295123	0.296069	0.297675	0.352389	0.488659	0.471436	0.386414	0.391236	0.347832	0.54748	0.572776	0.451639	0.447856	0.444753	0.561352	0.543889	0.439304	0.4636	0.487678	0.650362	0.608185	0.486744	0.495677
619.2	0.297937	0.298256	0.29354	0.294349	0.2959	0.350093	0.48502	0.468655	0.383998	0.388865	0.345963	0.543857	0.569122	0.44859	0.444897	0.441324	0.558132	0.541051	0.436219	0.460537	0.484297	0.645822	0.604859	0.483359	0.492402
619.4	0.295804	0.29618	0.29125	0.292418	0.293805	0.347371	0.481117	0.464644	0.381091	0.386192	0.343644	0.538716	0.564034	0.445049	0.441629	0.437635	0.553661	0.536409	0.432713	0.4569	0.480713	0.640958	0.599767	0.479622	0.48882
619.6	0.294755	0.294999	0.290642	0.29129	0.292936	0.346155	0.479257	0.462824	0.379733	0.384772	0.342404	0.536203	0.561633	0.443394	0.439899	0.436423	0.552318	0.534272	0.431146	0.455064	0.479366	0.638287	0.597167	0.477822	0.486777
619.8	0.292531	0.292657	0.288662	0.289407	0.290655	0.343519	0.475272	0.459383	0.37687	0.381726	0.33924	0.532643	0.557178	0.439852	0.436283	0.433241	0.547828	0.530315	0.427736	0.45164	0.474961	0.633418	0.592364	0.474189	0.483021
620	0.291041	0.291043	0.287187	0.288001	0.289269	0.341472	0.473211	0.456682	0.37492	0.379793	0.337275	0.529918	0.554283	0.437571	0.433913	0.430832	0.544553	0.52765	0.42575	0.449433	0.472913	0.630369	0.58833	0.471949	0.480557
620.2	0.289096	0.288986	0.285666	0.286059	0.287528	0.339037	0.470159	0.453896	0.372611	0.377505	0.335067	0.526484	0.550557	0.434919	0.430982	0.427719	0.541462	0.524006	0.422935	0.446491	0.470211	0.625546	0.583941	0.46874	0.477274
620.4	0.286703	0.286778	0.283853	0.283981	0.285616	0.335751	0.46593	0.45023	0.369586	0.374723	0.332605	0.52181	0.544813	0.431163	0.4277	0.423902	0.536481	0.520138	0.419705	0.443242	0.466323	0.619998	0.579027	0.465187	0.473278
620.6	0.285606	0.285923	0.282566	0.282839	0.284478	0.334269	0.463925	0.448559	0.368165	0.373515	0.331534	0.519712	0.542518	0.429679	0.425893	0.422349	0.534086	0.517792	0.418073	0.441319	0.46419	0.617332	0.577016	0.463327	0.471252
620.8	0.283348	0.284299	0.279978	0.280896	0.282243	0.331358	0.459741	0.444943	0.365489	0.370684	0.328618	0.515533	0.537764	0.4262	0.422481	0.41917	0.52956	0.513829	0.414894	0.437732	0.460213	0.612231	0.572507	0.46001	0.467335
621	0.281905	0.282955	0.278603	0.279557	0.280915	0.32993	0.457082	0.443119	0.363838	0.368837	0.327087	0.512591	0.534467	0.424198	0.420283	0.416998	0.526337	0.510755	0.412891	0.435365	0.457524	0.609188	0.569379	0.457458	0.46487
621.2	0.280178	0.281216	0.276619	0.277799	0.279345	0.328333	0.453639	0.441247	0.361832	0.366548	0.32545	0.508901	0.530772	0.421547	0.417551	0.414445	0.522659	0.507272	0.410157	0.432334	0.4545	0.606026	0.565056	0.454176	0.46193
621.4	0.278191	0.279119	0.274432	0.275904	0.277263	0.325745	0.449662	0.437516	0.35917	0.363673	0.322952	0.504729	0.526166	0.417989	0.414178	0.411147	0.518146	0.502509	0.407261	0.42897	0.45033	0.601351	0.559621	0.450364	0.45817
621.6	0.27666	0.277405	0.273098	0.274272	0.275754	0.323573	0.446507	0.434639	0.35687	0.361325	0.321111	0.501441	0.521854	0.415244	0.411683	0.407878	0.51498	0.49956	0.404793	0.426069	0.447282	0.596828	0.555455	0.447266	0.455442
621.8	0.275284	0.275801	0.271977	0.272805	0.274393	0.321997	0.443849	0.431934	0.355283	0.359507	0.319554	0.498628	0.51827	0.413079	0.409614	0.405539	0.512243	0.497107	0.402821	0.423802	0.444748	0.593318	0.552536	0.44473	0.452862
622	0.272934	0.273779	0.269692	0.271028	0.272425	0.319159	0.440429	0.428128	0.352731	0.356546	0.316983	0.494852	0.513669	0.409608	0.406383	0.402476	0.508142	0.493746	0.399359	0.420505	0.441391	0.588377	0.548518	0.440944	0.448998
622.2	0.271981	0.272777	0.268548	0.270035	0.271462	0.317713	0.439097	0.426008	0.351436	0.355064	0.316001	0.493144	0.511762	0.407992	0.404595	0.401082	0.505746	0.491729	0.397515	0.419025	0.438843	0.586563	0.546764	0.439445	0.447369
622.4	0.270044	0.270585	0.26633	0.268011	0.269573	0.315136	0.435824	0.422642	0.34886	0.352209	0.313478	0.488878	0.507546	0.404847	0.40128	0.397985	0.500973	0.486757	0.394646	0.415985	0.435809	0.581742	0.542221	0.436015	0.443613
622.6	0.26841	0.26929	0.264606	0.266311	0.267953	0.312878	0.432908	0.419921	0.3467	0.349746	0.31142	0.486024	0.50375	0.402299	0.398547	0.395429	0.497628	0.483112	0.392056	0.413154	0.432522	0.577322	0.539137	0.433244	0.440569
622.8	0.267148	0.268143	0.263049	0.264999	0.266737	0.311538	0.430742	0.417795	0.344917	0.348018	0.309868	0.483586	0.500881	0.400208	0.396382	0.392938	0.494989	0.480766	0.389933	0.410904	0.429785	0.573799	0.536212	0.430919	0.438134
623	0.264884	0.26625	0.260582	0.262888	0.264841	0.309573	0.427456	0.413659	0.342143	0.345379	0.30745	0.478844	0.496257	0.396933	0.393205	0.389662	0.491113	0.477052	0.3869	0.407663	0.426884	0.56879	0.53161	0.427648	0.434521
623.2	0.26397	0.264998	0.259448	0.261935	0.264012	0.308528	0.425298	0.411771	0.340882	0.343988	0.306242	0.477053	0.494162	0.395055	0.39164	0.388184	0.489424	0.474917	0.385112	0.406008	0.424542	0.565945	0.530029	0.425845	0.43278
623.4	0.26226	0.263165	0.25738	0.260248	0.262027	0.306651	0.42202	0.408142	0.33831	0.341165	0.303569	0.473076	0.489588	0.391965	0.388546	0.384791	0.485017	0.471531	0.382095	0.4027	0.420848	0.561259	0.525268	0.42242	0.42923
623.6	0.260847	0.261533	0.255863	0.258592	0.260417	0.305358	0.418375	0.405613	0.336462	0.338864	0.301297	0.469646	0.486654	0.389283	0.385728	0.382137	0.481594	0.468035	0.379671	0.400013	0.418242	0.557367	0.521956	0.419316	0.426372
623.8	0.259664	0.260118	0.254893	0.257464	0.259212	0.304203	0.416218	0.403962	0.334881	0.337222	0.299606	0.466935	0.484432	0.387042	0.383526	0.379854	0.478714	0.465244	0.377401	0.397856	0.416315	0.55415	0.519462	0.416849	0.424123
624	0.257633	0.258023	0.253009	0.255644	0.257514	0.302333	0.413234	0.400214	0.332003	0.334646	0.297326	0.463083	0.480236	0.384094	0.380632	0.376703	0.474881	0.461846	0.374236	0.39452	0.413019	0.549684	0.515733	0.41315	0.42092
624.2	0.256841	0.25723	0.25197	0.254577	0.256507	0.301413	0.412131	0.398306	0.330481	0.333298	0.296216	0.461021	0.478463	0.382542	0.379124	0.375208	0.473894	0.459653	0.372791	0.392953	0.411257	0.547268	0.513264	0.411543	0.419161
624.4	0.254642	0.25545	0.250383	0.252574	0.254597	0.298638	0.409072	0.394883	0.328019	0.330866	0.293339	0.457376	0.47427	0.379197	0.375938	0.372065	0.470689	0.456008	0.370042	0.389903	0.407921	0.541676	0.509165	0.408145	0.415392
624.6	0.253389	0.253812	0.248796	0.25103	0.252932	0.296792	0.406669	0.392097	0.325819	0.328712	0.291308	0.453974	0.471462	0.376699	0.373286	0.369898	0.467903	0.45313	0.36737	0.387326	0.40568	0.53821	0.505911	0.405201	0.412369
624.8	0.252061	0.252687	0.247583	0.249726	0.251581	0.295222	0.404332	0.389935	0.324074	0.327149	0.289715	0.451126	0.468991	0.374542	0.371114	0.368184	0.465143	0.450567	0.365298	0.385285	0.403617	0.535278	0.503349	0.403006	0.409952
625	0.250231	0.250981	0.245658	0.247985	0.249758	0.292795	0.40154	0.387894	0.321571	0.32459	0.287218	0.448013	0.465691	0.371655	0.368017	0.365581	0.461401	0.446538	0.362349	0.38197	0.400096	0.530588	0.498627	0.400091	0.406615
625.2	0.249354	0.250277	0.244891	0.246951	0.248774	0.291869	0.399835	0.38623	0.320232	0.323278	0.286029	0.446198	0.464028	0.370031	0.366457	0.363987	0.459342	0.444523	0.360988	0.380199	0.398464	0.528383	0.495825	0.398508	0.40491
625.4	0.247803	0.24831	0.24295	0.245018	0.247101	0.290045	0.396009	0.383312	0.31734	0.320717	0.283011	0.44269	0.460282	0.367019	0.36347	0.361231	0.455922	0.440942	0.358118	0.376914	0.394678	0.52444	0.490729	0.395075	0.401468
625.6	0.246479	0.246984	0.241811	0.243611	0.245935	0.288604	0.393679	0.381254	0.315702	0.319102	0.28129	0.440308	0.457677	0.364975	0.361632	0.359288	0.453795	0.438711	0.3562	0.374812	0.392232	0.521571	0.487756	0.392939	0.399297
625.8	0.244699	0.245184	0.240511	0.241928	0.244426	0.286875	0.390534	0.378996	0.313486	0.317004	0.279497	0.437175	0.454572	0.362395	0.359211	0.356817	0.451079	0.436054	0.353607	0.372169	0.389427	0.517977	0.483866	0.390191	0.396482
626	0.243254	0.243114	0.238865	0.239994	0.242414	0.284241	0.38661	0.376012	0.310961	0.314157	0.276615	0.433395	0.451227	0.359212	0.356139	0.353908	0.446261	0.432015	0.350602	0.369084	0.386019	0.513686	0.479083	0.387019	0.393143
626.2	0.242432	0.242125	0.238096	0.239102	0.241568	0.283305	0.385189	0.374939	0.309834	0.312824	0.275483	0.431914	0.449971	0.357719	0.3547	0.352567	0.444387	0.430211	0.349196	0.367517	0.384027	0.511406	0.476826	0.385415	0.39146
626.4	0.240628	0.240661	0.23663	0.237354	0.239701	0.280921	0.382061	0.372076	0.307331	0.310335	0.273406	0.428156	0.445957	0.354916	0.351834	0.349875	0.440789	0.425786	0.346452	0.364535	0.380832	0.507678	0.472523	0.381967	0.387995
626.6	0.239467	0.239259	0.235401	0.236077	0.238481	0.279452	0.379988	0.370389	0.305624	0.308737	0.272137	0.425799	0.443261	0.352889	0.350044	0.347742	0.438341	0.422861	0.344607	0.36248	0.378716	0.505032	0.470137	0.379725	0.385986
626.8	0.237893	0.237525	0.233806	0.234487	0.236986	0.277452	0.378237	0.367882	0.303398	0.306845	0.270606	0.422998	0.439984	0.350535	0.347814	0.345572	0.435368	0.419301	0.342321	0.359817	0.376088	0.501565	0.466793	0.377014	0.383437
627	0.236281	0.236248	0.231889	0.232631	0.235154	0.275015	0.37538	0.364312	0.300998	0.304155	0.268558	0.41902	0.436163	0.347841	0.34508	0.342941	0.431402	0.416069	0.339851	0.356822	0.372312	0.497194	0.462247	0.374245	0.380191
627.2	0.235248	0.235375	0.231111	0.231612	0.234195	0.273645	0.3737	0.362817	0.299782	0.303013	0.267325	0.417652	0.434253	0.34625	0.343736	0.341798	0.429841	0.413971	0.338516	0.35519	0.370731	0.495035	0.459973	0.372653	0.378347
627.4	0.233556	0.233821	0.229251	0.229874	0.232282	0.271457	0.37031	0.36005	0.29761	0.300621	0.264882	0.414153	0.430469	0.343097	0.340844	0.339014	0.42628	0.410504	0.335724	0.35251	0.367596	0.491209	0.456402	0.369271	0.375037
627.6	0.232063	0.231775	0.227591	0.228242	0.230529	0.26934	0.367516	0.357192	0.294976	0.298134	0.262897	0.41087	0.42724	0.34045	0.338134	0.336813	0.423061	0.406928	0.332906	0.349767	0.364582	0.487567	0.452606	0.366523	0.372245
627.8	0.231046	0.230839	0.226878	0.227212	0.229767	0.2683	0.366378	0.355992	0.293696	0.296937	0.261761	0.408773	0.425154	0.339027	0.336794	0.335117	0.42098	0.404907	0.331531	0.348317	0.362835	0.485276	0.450507	0.365114	0.370769
628	0.22914	0.228411	0.225157	0.22558	0.227862	0.266609	0.363823	0.353361	0.291227	0.294365	0.259655	0.405092	0.421689	0.336714	0.334063	0.332287	0.417771	0.401101	0.328622	0.345082	0.359797	0.481022	0.44597	0.362382	0.367873
628.2	0.227608	0.226924	0.223577	0.224085	0.226351	0.264622	0.361016	0.350262	0.28903	0.292235	0.258321	0.401845	0.418597	0.334232	0.331675	0.33018	0.414572	0.398891	0.326373	0.342824	0.357296	0.477758	0.442769	0.359517	0.365518
628.4	0.226487	0.225747	0.222307	0.222948	0.225134	0.263217	0.359147	0.348319	0.287364	0.290588	0.257028	0.399681	0.416029	0.332335	0.329783	0.327946	0.41257	0.396763	0.324671	0.340987	0.354949	0.474969	0.440356	0.357281	0.363498
628.6	0.224686	0.224523	0.220799	0.221304	0.22332	0.260875	0.356263	0.345438	0.285484	0.28843	0.255138	0.395197	0.412553	0.329646	0.327064	0.324853	0.409323	0.392678	0.322045	0.338374	0.352969	0.470806	0.437182	0.354083	0.360326
628.8	0.224007	0.2236	0.219918	0.220499	0.222391	0.25982	0.354967	0.344077	0.28415	0.287355	0.253645	0.393831	0.410763	0.328114	0.325695	0.323569	0.407478	0.390766	0.320585	0.336933	0.351516	0.469118	0.43534	0.3526	0.359002
629	0.222292	0.221569	0.218274	0.219023	0.220356	0.257597	0.352349	0.341163	0.281941	0.28513	0.251039	0.390216	0.407295	0.325329	0.323054	0.320936	0.404094	0.387306	0.318353	0.334234	0.348511	0.464413	0.43204	0.349717	0.355776
629.2	0.221184	0.220522	0.216976	0.217978	0.219254	0.256539	0.350401	0.339097	0.280735	0.28385	0.25003	0.388237	0.404764	0.323628	0.321376	0.319228	0.402369	0.385042	0.31682	0.332547	0.346855	0.461656	0.429573	0.34791	0.353728
629.4	0.219678	0.219183	0.215644	0.216758	0.217828	0.254716	0.347856	0.336532	0.278928	0.282196	0.248433	0.385039	0.4018	0.321547	0.31922	0.316758	0.399647	0.382196	0.314739	0.330167	0.344894	0.458673	0.426741	0.345525	0.351215
629.6	0.218139	0.217499	0.213994	0.215139	0.216109	0.253133	0.345492	0.333649	0.276494	0.279875	0.245833	0.382117	0.398996	0.318764	0.316609	0.314191	0.395841	0.379729	0.312269	0.327246	0.342348	0.454079	0.42326	0.342914	0.348585
629.8	0.217328	0.216732	0.213276	0.214218	0.215358	0.251952	0.34414	0.331858	0.275434	0.278786	0.244792	0.380539	0.397331	0.317229	0.315099	0.313326	0.394557	0.378384	0.311184	0.325836	0.340893	0.452225	0.42105	0.341435	0.347048
630	0.215706	0.215139	0.211769	0.212587	0.21386	0.249507	0.340836	0.329442	0.273321	0.276518	0.242025	0.376743	0.393788	0.314545	0.312305	0.310827	0.391314	0.37608	0.308682	0.323291	0.338061	0.448281	0.417176	0.338524	0.343879
630.2	0.214516	0.213877	0.210383	0.211476	0.212772	0.24825	0.339102	0.32755	0.271797	0.275144	0.240524	0.374909	0.391326	0.312813	0.310656	0.309103	0.38948	0.373535	0.306987	0.321496	0.336188	0.445544	0.414524	0.336388	0.341959
630.4	0.213191	0.212553	0.209037	0.210166	0.211461	0.246866	0.33719	0.325551	0.269865	0.273172	0.238632	0.37231	0.388611	0.31073	0.308465	0.306804	0.386811	0.370857	0.304786	0.3194	0.333834	0.442461	0.411613	0.333958	0.339547
630.6	0.211524	0.210557	0.207187	0.208539	0.209826	0.244943	0.334931	0.322668	0.267439	0.270963	0.236972	0.369364	0.38571	0.308539	0.30584	0.304127	0.383237	0.367652	0.302234	0.316698	0.331171	0.438799	0.407644	0.331448	0.33659
630.8	0.210088	0.20936	0.205545	0.207128	0.208598	0.243209	0.332442	0.320755	0.265758	0.269113	0.235199	0.367001	0.382946	0.306268	0.303787	0.3019	0.379943	0.365361	0.300134	0.314419	0.32853	0.435456	0.404958	0.328774	0.334263
631	0.209061	0.208064	0.20416	0.206036	0.207522	0.241944	0.330364	0.319097	0.264271	0.267777	0.233766	0.365043	0.380675	0.304345	0.30202	0.300258	0.37748	0.363825	0.298473	0.312585	0.326705	0.432708	0.402631	0.326674	0.332332
631.2	0.207647	0.206916	0.202614	0.204276	0.206002	0.239873	0.327592	0.315738	0.262205	0.265771	0.231289	0.3627	0.377681	0.301672	0.299647	0.297392	0.373884	0.361343	0.296286	0.310084	0.323446	0.428967	0.399928	0.323817	0.329529
631.4	0.206906	0.206121	0.201723	0.203512	0.205238	0.239105	0.326722	0.314757	0.261212	0.264917	0.229942	0.361338	0.3759	0.30047	0.298537	0.295981	0.37288	0.358892	0.295176	0.308802	0.321857	0.426991	0.39854	0.322504	0.32801
631.6	0.205451	0.204629	0.200109	0.201887	0.203692	0.237148	0.324094	0.312032	0.259355	0.26287	0.227706	0.357793	0.372872	0.298041	0.295998	0.293751	0.369523	0.355118	0.292783	0.306485	0.319531	0.423744	0.395713	0.319693	0.325151
631.8	0.204451	0.203262	0.199056	0.200822	0.202683	0.235913	0.322316	0.310407	0.258048	0.26158	0.226267	0.356314	0.37067	0.296601	0.294326	0.291873	0.367223	0.353438	0.291219	0.304711	0.317519	0.421004	0.393394	0.317937	0.323372
632	0.203115	0.201834	0.197509	0.199609	0.201505	0.234341	0.320358	0.308826	0.256375	0.259835	0.224943	0.353725	0.367999	0.294746	0.292318	0.289696	0.364823	0.351085	0.289387	0.302472	0.315367	0.417659	0.390191	0.315667	0.320949
632.2	0.201658	0.20034	0.195907	0.197913	0.200063	0.232525	0.31853	0.307011	0.2545	0.257772	0.223295	0.351037	0.365113	0.292446	0.289888	0.287172	0.361687	0.348581	0.286778	0.300226	0.312813	0.41473	0.38646	0.312771	0.318238
632.4	0.200798	0.199586	0.195219	0.197103	0.199305	0.231398	0.317779	0.305521	0.253315	0.256736	0.22215	0.349463	0.363475	0.291012	0.288751	0.285985	0.360283	0.346859	0.285598	0.2989	0.311442	0.412875	0.385433	0.311304	0.316789
632.6	0.19928	0.198034	0.193548	0.195387	0.197702	0.228822	0.315251	0.302175	0.250867	0.25465	0.220208	0.346944	0.359901	0.288654	0.286494	0.283749	0.357545	0.344693	0.28311	0.296677	0.308525	0.409537	0.382506	0.308567	0.314294
632.8	0.19795	0.196902	0.192553	0.194405	0.196614	0.227521	0.312978	0.300873	0.249566	0.253295	0.219112	0.344781	0.357578	0.287159	0.284963	0.282369	0.355647	0.342566	0.281563	0.295092	0.306529	0.407508	0.380234	0.306757	0.312362
633	0.196403	0.195782	0.1912	0.193172	0.195235	0.226163	0.310787	0.299123	0.247898	0.251663	0.217587	0.342059	0.3552	0.285217	0.283247	0.280353	0.353112	0.339752	0.279602	0.293114	0.304246	0.404405	0.377599	0.304666	0.30997
633.2	0.19472	0.194712	0.189632	0.191716	0.19354	0.224807	0.308292	0.296791	0.245852	0.249601	0.216382	0.339059	0.352304	0.282804	0.281137	0.277311	0.349989	0.336731	0.277191	0.290869	0.301581	0.400853	0.374346	0.302219	0.307541
633.4	0.193558	0.193114	0.188752	0.190525	0.192326	0.22357	0.306012	0.294798	0.244291	0.247851	0.214566	0.336462	0.349471	0.280831	0.279201	0.275245	0.347998	0.334323	0.275346	0.288992	0.300062	0.397795	0.371567	0.299986	0.305288
633.6	0.192826	0.191883	0.187833	0.189518	0.191247	0.222274	0.304179	0.293644	0.243013	0.246541	0.213323	0.334287	0.347499	0.279208	0.277611	0.273744	0.34601	0.332253	0.273844	0.287345	0.298334	0.395554	0.369601	0.298415	0.303568
633.8	0.191291	0.190544	0.186356	0.188044	0.189687	0.220344	0.301388	0.291195	0.241156	0.244671	0.211129	0.331441	0.344153	0.276682	0.275457	0.27145	0.343721	0.329415	0.271867	0.284908	0.29596	0.391939	0.36622	0.295711	0.300879
634	0.190783	0.19004	0.185958	0.187392	0.188888	0.219372	0.300393	0.289594	0.240168	0.243711	0.210297	0.329758	0.342553	0.275478	0.274295	0.270662	0.342384	0.328296	0.270806	0.28367	0.294897	0.390321	0.364569	0.29468	0.299529
634.2	0.189467	0.188827	0.185001	0.185985	0.187354	0.217581	0.298588	0.286499	0.238254	0.241668	0.208365	0.326836	0.339448	0.273413	0.272122	0.268543	0.340204	0.324491	0.268748	0.28149	0.292765	0.387176	0.361624	0.292155	0.297069
634.4	0.188675	0.187675	0.18417	0.185113	0.186389	0.216448	0.296992	0.285302	0.237093	0.240274	0.207331	0.32491	0.337466	0.271971	0.270638	0.267215	0.338991	0.322521	0.267215	0.280029	0.291442	0.384956	0.359858	0.290443	0.295348
634.6	0.187241	0.186513	0.183311	0.184022	0.185045	0.215041	0.294785	0.283661	0.235486	0.238502	0.205885	0.322965	0.334717	0.270277	0.268738	0.265734	0.337203	0.320532	0.265178	0.278303	0.289436	0.382629	0.357824	0.288451	0.29335
634.8	0.185758	0.184978	0.181849	0.182629	0.183532	0.213218	0.292436	0.281322	0.23337	0.236707	0.203994	0.320321	0.331529	0.267927	0.266734	0.263404	0.334902	0.318421	0.262861	0.275971	0.286962	0.379528	0.354849	0.286258	0.291092
635	0.184917	0.184543	0.181171	0.181985	0.182749	0.212463	0.291378	0.279858	0.232343	0.235898	0.203027	0.318904	0.330207	0.266767	0.265748	0.262431	0.333583	0.316986	0.261773	0.274809	0.285689	0.378196	0.353483	0.285127	0.289913
635.2	0.183444	0.18307	0.179962	0.180336	0.181231	0.210759	0.28867	0.276882	0.230467	0.233736	0.201309	0.316024	0.327365	0.264362	0.263487	0.260865	0.33045	0.315094	0.259202	0.272667	0.283228	0.375182	0.350711	0.28261	0.287599
635.4	0.182421	0.182394	0.179046	0.17932	0.180327	0.209668	0.286841	0.274985	0.229069	0.232482	0.19996	0.314032	0.325015	0.262995	0.261988	0.259619	0.329128	0.313411	0.25779	0.270941	0.281317	0.37292	0.348485	0.281143	0.286059
635.6	0.18116	0.181195	0.177728	0.178124	0.179182	0.208389	0.284887	0.272939	0.227487	0.230932	0.198524	0.311717	0.322524	0.261273	0.260224	0.257705	0.32657	0.311563	0.255915	0.269096	0.278919	0.369792	0.345606	0.27912	0.284262
635.8	0.17986	0.179765	0.176385	0.176951	0.1777	0.207122	0.282741	0.271433	0.225689	0.228969	0.196817	0.30852	0.320083	0.259034	0.258014	0.255521	0.324213	0.30811	0.253798	0.266715	0.27717	0.366744	0.342191	0.276732	0.281635
636	0.179167	0.179127	0.175433	0.175973	0.17681	0.206168	0.281889	0.269879	0.224425	0.227796	0.195706	0.307118	0.31844	0.257687	0.256497	0.253937	0.322431	0.306487	0.252359	0.265156	0.275634	0.364438	0.340502	0.275179	0.280153
636.2	0.17813	0.177915	0.174503	0.174986	0.175806	0.204784	0.280513	0.268567	0.222863	0.226214	0.19418	0.305071	0.316596	0.255998	0.254471	0.252399	0.320335	0.304291	0.250464	0.263267	0.273598	0.361705	0.338249	0.273248	0.2784
636.4	0.176934	0.176006	0.173166	0.173542	0.174382	0.202904	0.278296	0.266112	0.220879	0.224143	0.192678	0.303097	0.31387	0.2541	0.252183	0.250525	0.318248	0.301382	0.248422	0.260945	0.271437	0.358883	0.335869	0.27106	0.276
636.6	0.176291	0.175637	0.172319	0.172803	0.173735	0.202066	0.277134	0.265368	0.220062	0.223275	0.192031	0.301638	0.312407	0.253111	0.251087	0.249524	0.317195	0.300269	0.247588	0.259907	0.270207	0.357703	0.334723	0.26999	0.274884
636.8	0.17466	0.173996	0.170863	0.171535	0.172492	0.200519	0.274899	0.262612	0.218174	0.221764	0.190404	0.299546	0.309616	0.251089	0.249095	0.247654	0.314594	0.298313	0.245608	0.257888	0.267926	0.355247	0.331768	0.267698	0.272705
637	0.17379	0.173349	0.170184	0.170649	0.171708	0.199294	0.27348	0.26114	0.216901	0.220498	0.18931	0.297914	0.30749	0.24962	0.247703	0.24666	0.312417	0.296674	0.244201	0.256601	0.266534	0.353009	0.330342	0.266207	0.271404
637.2	0.172621	0.172205	0.16915	0.16955	0.17066	0.197937	0.271683	0.259738	0.215389	0.218911	0.18806	0.296086	0.305084	0.24789	0.245847	0.244989	0.310123	0.294265	0.242429	0.254924	0.264806	0.350504	0.327944	0.264226	0.269528
637.4	0.17107	0.170865	0.167905	0.168079	0.169436	0.19643	0.269302	0.258273	0.213621	0.217177	0.1868	0.293322	0.302443	0.245821	0.243791	0.242477	0.307271	0.292243	0.240409	0.252821	0.262858	0.346844	0.325006	0.262326	0.267223
637.6	0.169904	0.170134	0.166797	0.167125	0.168621	0.195396	0.267566	0.256887	0.212356	0.216141	0.185752	0.29159	0.300477	0.244335	0.242412	0.24102	0.305082	0.2904	0.239048	0.251583	0.261216	0.34479	0.322652	0.260643	0.265759
637.8	0.168995	0.169215	0.165632	0.165946	0.167661	0.194194	0.265788	0.254818	0.211018	0.21482	0.184425	0.289013	0.298612	0.242491	0.240763	0.23889	0.302405	0.288614	0.237534	0.249813	0.259683	0.341727	0.319683	0.258647	0.263955
638	0.167489	0.167557	0.164424	0.164779	0.166345	0.192632	0.26362	0.253165	0.209259	0.213085	0.182907	0.286448	0.295944	0.24048	0.238878	0.236977	0.299295	0.28591	0.235476	0.247632	0.257478	0.337981	0.316508	0.256356	0.261579
638.2	0.167018	0.167058	0.163762	0.164128	0.165766	0.191973	0.262689	0.252399	0.208259	0.212031	0.182384	0.284932	0.294823	0.239248	0.237916	0.235913	0.297863	0.284727	0.234439	0.246683	0.256374	0.336481	0.314833	0.255208	0.260393
638.4	0.165682	0.165581	0.162584	0.163024	0.164452	0.190244	0.260841	0.251001	0.206573	0.21039	0.180788	0.28307	0.292103	0.237219	0.235978	0.233765	0.295797	0.281519	0.232658	0.244796	0.253989	0.333245	0.311535	0.253142	0.25802
638.6	0.164909	0.164542	0.161788	0.16229	0.163602	0.189506	0.259558	0.24973	0.205299	0.209239	0.179946	0.281574	0.290669	0.235722	0.234714	0.232392	0.293791	0.27951	0.231416	0.243498	0.252608	0.331636	0.309835	0.251589	0.256619
638.8	0.163998	0.163452	0.160795	0.161238	0.162577	0.188304	0.257725	0.248525	0.203757	0.207893	0.178894	0.279844	0.288776	0.23392	0.23305	0.23092	0.29185	0.277602	0.22982	0.241818	0.250839	0.329508	0.307567	0.249713	0.254578
639	0.162804	0.162087	0.159574	0.159828	0.161283	0.186964	0.255467	0.246726	0.202197	0.206184	0.177311	0.277593	0.286011	0.231732	0.23104	0.229177	0.28929	0.275746	0.22799	0.239879	0.248069	0.327044	0.30515	0.247399	0.252503
639.2	0.162036	0.160877	0.158743	0.158979	0.160454	0.185657	0.253826	0.245321	0.201113	0.20501	0.176277	0.275854	0.283983	0.230174	0.229792	0.227614	0.287644	0.273968	0.226734	0.238674	0.246666	0.325127	0.303128	0.245938	0.250925
639.4	0.161145	0.159657	0.157725	0.157831	0.159362	0.184392	0.251994	0.243024	0.199683	0.203662	0.175298	0.27368	0.281592	0.228469	0.228305	0.225517	0.285231	0.272061	0.225228	0.237047	0.244964	0.32242	0.300468	0.244033	0.24903
639.6	0.159746	0.158544	0.15638	0.156568	0.158123	0.182952	0.249691	0.2413	0.198071	0.202222	0.173587	0.270761	0.279227	0.226466	0.226689	0.223562	0.283069	0.269814	0.223293	0.235029	0.242669	0.319446	0.297734	0.241956	0.246849
639.8	0.158872	0.157861	0.155672	0.155961	0.157467	0.182103	0.24866	0.239876	0.197178	0.201476	0.172847	0.269846	0.278166	0.225396	0.225709	0.222688	0.281393	0.268202	0.222129	0.234037	0.241661	0.31781	0.295782	0.240941	0.245714
640	0.157845	0.156911	0.154436	0.154647	0.156131	0.180671	0.246312	0.238236	0.195706	0.199653	0.171137	0.266898	0.276322	0.223325	0.223698	0.220713	0.278683	0.265811	0.220274	0.232191	0.239289	0.315009	0.293302	0.238889	0.243663
640.2	0.156952	0.15608	0.153685	0.153828	0.155247	0.179514	0.244958	0.237184	0.194596	0.198605	0.170328	0.265108	0.275195	0.222205	0.222432	0.219077	0.27711	0.263951	0.219045	0.230746	0.237634	0.313302	0.291366	0.237571	0.242322
640.4	0.155823	0.155084	0.152571	0.152701	0.154098	0.178451	0.242993	0.235372	0.193074	0.197261	0.169018	0.262989	0.273085	0.220547	0.220921	0.216862	0.275071	0.261837	0.217532	0.229117	0.235589	0.31093	0.289108	0.235918	0.240598
640.6	0.154471	0.153528	0.151258	0.151621	0.152694	0.177116	0.241213	0.233389	0.191579	0.195628	0.167562	0.260801	0.270782	0.218726	0.219019	0.215391	0.272981	0.259669	0.215546	0.226963	0.233289	0.309243	0.286138	0.233671	0.238352
640.8	0.153668	0.152576	0.15077	0.150794	0.15183	0.176126	0.240492	0.232051	0.190488	0.194387	0.166492	0.258943	0.269137	0.217454	0.217729	0.214338	0.271298	0.258115	0.214305	0.225598	0.231961	0.307523	0.284537	0.232409	0.236957
641	0.152703	0.151441	0.149831	0.149687	0.150867	0.174772	0.23901	0.230747	0.189037	0.192821	0.165104	0.256728	0.267494	0.215841	0.216208	0.212854	0.269557	0.25624	0.212772	0.224017	0.230004	0.305702	0.282402	0.230808	0.2352
641.2	0.151499	0.150215	0.1487	0.148531	0.149679	0.17316	0.237168	0.228513	0.187371	0.19121	0.163636	0.25416	0.26552	0.214064	0.213998	0.211209	0.26749	0.254143	0.211116	0.222095	0.227999	0.303176	0.279426	0.228502	0.233061
641.4	0.150614	0.149577	0.148293	0.147821	0.149044	0.172386	0.236317	0.227181	0.18677	0.190501	0.162733	0.25326	0.264436	0.213256	0.213073	0.210284	0.266601	0.253158	0.210326	0.221207	0.227414	0.30177	0.278731	0.227473	0.231931
641.6	0.149357	0.14855	0.146903	0.1466	0.147987	0.171199	0.234498	0.225295	0.185145	0.188903	0.161667	0.250717	0.262159	0.211537	0.211224	0.208101	0.263741	0.250995	0.208598	0.219025	0.225186	0.299586	0.276502	0.225713	0.23012
641.8	0.148578	0.147646	0.145976	0.145727	0.147202	0.17014	0.233054	0.22375	0.18416	0.187784	0.160649	0.249443	0.260493	0.210536	0.210024	0.206875	0.262188	0.249642	0.20736	0.217839	0.224004	0.297658	0.275222	0.224417	0.228712
642	0.147573	0.146785	0.14491	0.144749	0.146136	0.168736	0.231084	0.221754	0.182971	0.186246	0.159121	0.2477	0.258758	0.209213	0.208481	0.205323	0.260381	0.247622	0.205889	0.216234	0.222376	0.295843	0.273252	0.222754	0.227158
642.2	0.146211	0.145894	0.143912	0.143506	0.145016	0.167127	0.229365	0.219848	0.181306	0.18471	0.157707	0.246114	0.256573	0.207659	0.206694	0.203115	0.257803	0.245648	0.204083	0.214219	0.220668	0.293383	0.271062	0.220852	0.225054
642.4	0.145326	0.14511	0.143055	0.14264	0.144198	0.166063	0.227642	0.218651	0.180164	0.183696	0.15672	0.244349	0.254793	0.206673	0.205545	0.202095	0.255889	0.244539	0.202885	0.212963	0.219204	0.291799	0.269508	0.219732	0.223931
642.6	0.144277	0.144127	0.14198	0.141636	0.143178	0.164905	0.226047	0.217484	0.1788	0.182434	0.155419	0.242145	0.252593	0.205162	0.20408	0.200821	0.25393	0.24319	0.20132	0.21145	0.217613	0.290064	0.267519	0.218141	0.2225
642.8	0.143399	0.142789	0.140981	0.140462	0.142063	0.163294	0.224067	0.215248	0.177308	0.181096	0.154045	0.239779	0.250104	0.203311	0.202156	0.199238	0.250428	0.24151	0.199733	0.209686	0.215623	0.28724	0.26447	0.216257	0.220534
643	0.142964	0.1422	0.140675	0.139906	0.141462	0.162422	0.222944	0.214746	0.176489	0.180411	0.153251	0.238999	0.249163	0.20257	0.201256	0.198338	0.249774	0.240863	0.198898	0.208676	0.214245	0.285875	0.26353	0.215241	0.219638
643.2	0.141553	0.141249	0.139784	0.138771	0.140411	0.161035	0.221168	0.212291	0.17509	0.178906	0.152214	0.237328	0.24689	0.200891	0.199606	0.196273	0.247432	0.238839	0.197255	0.206868	0.212523	0.283192	0.260817	0.213517	0.217664
643.4	0.140839	0.140293	0.138994	0.138106	0.139696	0.160311	0.22024	0.210894	0.174134	0.177845	0.15121	0.235791	0.245081	0.199707	0.198389	0.195216	0.246255	0.237874	0.195977	0.205749	0.211024	0.281702	0.25944	0.212246	0.216278
643.6	0.139953	0.139164	0.13814	0.137215	0.138812	0.159184	0.218997	0.209211	0.172983	0.176569	0.149881	0.233705	0.243225	0.198373	0.197074	0.194212	0.244563	0.23633	0.194539	0.20425	0.209202	0.279993	0.257597	0.210682	0.214749
643.8	0.138723	0.138561	0.136876	0.136171	0.137653	0.157575	0.216137	0.20672	0.17158	0.175118	0.148198	0.232223	0.241035	0.196684	0.195292	0.192383	0.241699	0.233881	0.192914	0.202654	0.207319	0.276948	0.255156	0.20884	0.213019
644	0.13809	0.138078	0.13594	0.135431	0.136913	0.156799	0.214854	0.205376	0.170612	0.174202	0.147244	0.231094	0.239727	0.195696	0.194242	0.191079	0.240358	0.232721	0.191793	0.201446	0.20599	0.275557	0.253646	0.207683	0.211859
644.2	0.137199	0.137187	0.134808	0.134544	0.135949	0.155622	0.21352	0.203618	0.169485	0.173058	0.146051	0.229848	0.237444	0.194408	0.192701	0.189646	0.238127	0.230857	0.190407	0.19994	0.204478	0.273371	0.251559	0.20617	0.210346
644.4	0.136253	0.136231	0.133452	0.133363	0.134916	0.154208	0.212143	0.20196	0.168204	0.17154	0.145201	0.228125	0.235366	0.192703	0.191242	0.187794	0.235917	0.229173	0.188655	0.198313	0.202752	0.271211	0.249831	0.204521	0.208599
644.6	0.135813	0.135558	0.132961	0.132955	0.134408	0.1533	0.211166	0.20154	0.167436	0.170869	0.14452	0.227164	0.234075	0.191944	0.190448	0.187009	0.234686	0.228064	0.187786	0.197313	0.201433	0.27043	0.248182	0.203628	0.207755
644.8	0.134738	0.134452	0.132177	0.131895	0.133278	0.151807	0.209301	0.199221	0.165923	0.169499	0.143205	0.22472	0.231851	0.19008	0.188736	0.185652	0.232613	0.226303	0.18622	0.195732	0.20004	0.26666	0.245725	0.201503	0.205855
645	0.134081	0.133899	0.131411	0.13129	0.13254	0.150665	0.2085	0.198206	0.165088	0.168708	0.142241	0.22311	0.230325	0.188895	0.187615	0.184381	0.231459	0.224694	0.185231	0.194592	0.198904	0.265022	0.244125	0.200352	0.204828
645.2	0.133251	0.133034	0.130648	0.130466	0.131676	0.149654	0.207109	0.196273	0.163875	0.167663	0.141232	0.2211	0.228381	0.187572	0.186257	0.183196	0.229523	0.223106	0.184069	0.193169	0.197803	0.262839	0.242389	0.199018	0.203473
645.4	0.13214	0.13169	0.129699	0.129444	0.130469	0.148262	0.205206	0.194626	0.162561	0.166297	0.139962	0.21875	0.22631	0.185858	0.184687	0.181819	0.227356	0.220814	0.182383	0.19152	0.195856	0.259695	0.240009	0.197629	0.201756
645.6	0.131405	0.130942	0.12902	0.128786	0.12981	0.147636	0.204147	0.193598	0.16175	0.165377	0.139331	0.217484	0.225633	0.184705	0.183617	0.181003	0.226346	0.219206	0.181337	0.190422	0.194698	0.257957	0.23865	0.196363	0.200514
645.8	0.130505	0.130116	0.127996	0.127957	0.128866	0.146658	0.202289	0.191752	0.160661	0.164199	0.138181	0.216282	0.223901	0.183361	0.182221	0.179905	0.225206	0.217269	0.180157	0.18913	0.193157	0.256061	0.23685	0.194875	0.198894
646	0.129238	0.129321	0.127094	0.127105	0.127693	0.145387	0.200937	0.190296	0.159247	0.162646	0.136454	0.214943	0.221657	0.181681	0.180654	0.178348	0.224104	0.215141	0.178458	0.187513	0.191536	0.253819	0.235488	0.193155	0.197301
646.2	0.128613	0.128626	0.126567	0.126595	0.127147	0.144887	0.200149	0.189009	0.158561	0.161762	0.135844	0.213525	0.220352	0.180879	0.179959	0.177607	0.22292	0.214233	0.177623	0.186629	0.190978	0.252897	0.234885	0.192359	0.196388
646.4	0.127704	0.127197	0.125621	0.125369	0.126106	0.143403	0.198907	0.187526	0.157099	0.160239	0.13461	0.211712	0.218372	0.179315	0.178342	0.17589	0.221548	0.212354	0.175953	0.185045	0.189284	0.25125	0.232561	0.19054	0.194813
646.6	0.127015	0.126763	0.124911	0.124616	0.125366	0.142355	0.197529	0.186795	0.156151	0.159383	0.133899	0.210772	0.217258	0.178221	0.177421	0.17466	0.220287	0.210867	0.175074	0.184008	0.188514	0.249388	0.230562	0.189428	0.193792
646.8	0.126152	0.125926	0.123981	0.123726	0.124517	0.141143	0.196319	0.185525	0.154901	0.158384	0.132856	0.209764	0.21539	0.176924	0.176141	0.173383	0.218736	0.209377	0.173833	0.182722	0.187347	0.247184	0.228754	0.188018	0.192354
647	0.12519	0.124769	0.123169	0.122639	0.123616	0.140257	0.195243	0.184189	0.153496	0.156955	0.131986	0.20761	0.21331	0.175314	0.174814	0.171841	0.217101	0.207927	0.172271	0.181176	0.185284	0.244709	0.227146	0.18649	0.190793
647.2	0.124555	0.124042	0.122577	0.121987	0.122937	0.139379	0.193857	0.183144	0.152713	0.156153	0.131423	0.206591	0.21194	0.174207	0.173788	0.170784	0.216013	0.206845	0.171413	0.180207	0.184326	0.243096	0.225854	0.185347	0.18956
647.4	0.123674	0.123226	0.121783	0.121175	0.122099	0.138521	0.192056	0.181634	0.151569	0.15517	0.130672	0.205075	0.210518	0.172881	0.172615	0.169568	0.214639	0.206064	0.170295	0.178942	0.183071	0.241564	0.22477	0.183929	0.188085
647.6	0.122755	0.122247	0.1211	0.120255	0.121086	0.137607	0.190092	0.180194	0.150283	0.153931	0.129386	0.203188	0.208227	0.17133	0.171262	0.168068	0.213042	0.20339	0.168957	0.17741	0.181582	0.239289	0.22295	0.18224	0.186394
647.8	0.122105	0.121456	0.120209	0.119708	0.120351	0.137139	0.189176	0.17922	0.149393	0.152982	0.128544	0.202184	0.207093	0.170377	0.170208	0.166813	0.212157	0.201787	0.168036	0.176417	0.180372	0.237686	0.222032	0.181008	0.185334
648	0.121358	0.120405	0.119388	0.118746	0.11946	0.136248	0.187979	0.177781	0.1482	0.151704	0.127366	0.200798	0.205779	0.169266	0.169005	0.165671	0.211081	0.199897	0.166786	0.175263	0.179017	0.23629	0.220548	0.179768	0.183964
648.2	0.120129	0.119124	0.118677	0.117579	0.118447	0.135248	0.185823	0.17644	0.146859	0.150343	0.126166	0.198453	0.20407	0.16779	0.167588	0.164165	0.20939	0.198508	0.165226	0.1738	0.177643	0.234327	0.218223	0.178214	0.182301
648.4	0.119607	0.118519	0.118266	0.117049	0.118004	0.134681	0.185399	0.176224	0.146134	0.149646	0.125501	0.197885	0.202623	0.16702	0.166993	0.163137	0.209269	0.197525	0.164327	0.173209	0.176779	0.233062	0.217341	0.177538	0.181559
648.6	0.118506	0.117665	0.117066	0.115986	0.117201	0.133603	0.184208	0.174658	0.144659	0.148227	0.124476	0.196102	0.200399	0.16565	0.165393	0.161598	0.207553	0.196038	0.163172	0.171742	0.174858	0.231584	0.215534	0.175762	0.180088
648.8	0.117916	0.117236	0.116441	0.115318	0.116594	0.132711	0.183575	0.173207	0.143864	0.147483	0.123768	0.195051	0.19915	0.164639	0.164417	0.160516	0.206683	0.194979	0.162413	0.170781	0.173983	0.230166	0.214038	0.174854	0.178978
649	0.11707	0.116516	0.115723	0.114419	0.115814	0.131658	0.182718	0.172108	0.14291	0.146542	0.122891	0.193767	0.198053	0.163493	0.163286	0.158973	0.205531	0.193642	0.161145	0.169525	0.172853	0.228507	0.21211	0.173853	0.177691
649.2	0.116217	0.115437	0.114837	0.113235	0.114954	0.130837	0.181141	0.170621	0.141782	0.145428	0.122342	0.192001	0.196576	0.162157	0.161863	0.157509	0.203736	0.192333	0.159963	0.168072	0.17156	0.226737	0.209576	0.172391	0.176014
649.4	0.115412	0.114892	0.113994	0.11265	0.114337	0.130228	0.179988	0.169784	0.140925	0.144639	0.121504	0.190836	0.195658	0.161199	0.160862	0.156971	0.20241	0.19128	0.159059	0.167175	0.170556	0.225577	0.208096	0.17156	0.175071
649.6	0.114672	0.114381	0.112908	0.111985	0.113628	0.129414	0.178262	0.168905	0.139946	0.143716	0.120403	0.189465	0.194396	0.159949	0.159738	0.156241	0.200758	0.189497	0.158015	0.165946	0.169171	0.223373	0.206628	0.17047	0.173734
649.8	0.113759	0.11338	0.111829	0.111027	0.11262	0.128555	0.176492	0.16697	0.13887	0.142327	0.119281	0.187808	0.192564	0.158651	0.158454	0.155194	0.199305	0.18797	0.156559	0.164441	0.167633	0.221444	0.205262	0.168813	0.172209
650	0.113193	0.112754	0.110984	0.110447	0.111936	0.127927	0.175444	0.16621	0.138152	0.141481	0.118645	0.1867	0.191755	0.157747	0.157465	0.154091	0.198528	0.186777	0.155631	0.163481	0.166707	0.220269	0.204024	0.16773	0.171258
[truncated: 30 more columns]
