# Supplementary material for: Autophagosome membrane expansion is mediated by the N-terminus and cis-membrane association of human ATG8s
Source: eLife journal article supplement (doi:10.7554/elife.89185), 2023-06-08
Supplement: fig3-figsupp1-data1 [file Source data for Fig.3-S1.xlsx]

## Sheet: Figure 3-figure supplement 1
Figure 3-figure supplement 1A: LC3B-his NBD labelled residues of interest Relative fluorecence intensity
Wavelength (nm)	K42CNBD-his					K42CNBD-his + POPC-NTA					K42CNBD-his + DOPC-NTA					K42CNBD-his + 50POPE-NTA					K42CNBD-his + 50DOPE-NTA							Wavelength (nm)	L44CNBD-his					L44CNBD-his + POPC-NTA					L44CNBD-his + DOPC-NTA					L44CNBD-his + 50POPE-NTA					L44CNBD-his + 50DOPE-NTA
	R1	R2	R3	R4	R5	R1	R2	R3	R4	R5	R1	R2	R3	R4	R5	R1	R2	R3	R4	R5	R1	R2	R3	R4	R5				R1	R2	R3	R4	R5	R1	R2	R3	R4	R5	R1	R2	R3	R4	R5	R1	R2	R3	R4	R5	R1
500	0.059443	0.0560615	0.0764896	0.0626958	0.068108	0.46817	0.304164	0.281865	0.130974	0.143626	0.266156	0.270852	0.270299	0.10932	0.148098	0.57946	0.833154	0.412489	0.193337	0.22105	0.523541	0.499993	0.459172	0.18009	0.23505			500	0.123948	0.132316	0.139008	0.127861	0.130751	0.265011	0.105698	0.209615	0.199526	0.227552	0.334275	0.229242	0.343098	0.199621	0.267049	0.286544	0.153041	0.284504	0.244297	0.287425	0.384355
500.2	0.0602713	0.0570541	0.076144	0.0635227	0.0685978	0.442248	0.290343	0.269971	0.12951	0.141342	0.258938	0.264349	0.263208	0.110211	0.147318	0.552077	0.779896	0.392957	0.18842	0.213875	0.50492	0.480794	0.444115	0.178386	0.22993			500.2	0.125384	0.133946	0.139409	0.129953	0.132717	0.255924	0.109864	0.205065	0.200193	0.227007	0.325583	0.228286	0.341556	0.201443	0.265947	0.279819	0.153697	0.281012	0.241508	0.283431	0.377631
500.4	0.0618176	0.0589064	0.0756276	0.0650974	0.0696429	0.393254	0.263062	0.247594	0.126216	0.137556	0.245898	0.252802	0.248631	0.112396	0.145885	0.501404	0.684585	0.357339	0.180233	0.202087	0.471408	0.447045	0.418413	0.175531	0.220639			500.4	0.128262	0.137329	0.140363	0.134094	0.136748	0.239295	0.117665	0.197105	0.201891	0.226916	0.310627	0.227322	0.338064	0.205358	0.264318	0.267592	0.156201	0.276103	0.237071	0.276642	0.3657
500.6	0.0628248	0.0599136	0.0755597	0.0659583	0.0702167	0.37088	0.251224	0.236491	0.124776	0.135247	0.24041	0.246138	0.242132	0.113625	0.145077	0.478685	0.640833	0.341882	0.176493	0.196636	0.456293	0.433327	0.405809	0.174409	0.215983			500.6	0.129833	0.139034	0.141047	0.136282	0.138822	0.232106	0.121459	0.193349	0.20273	0.227148	0.303989	0.226899	0.336914	0.207235	0.264055	0.262086	0.157406	0.273744	0.235232	0.273935	0.360937
500.8	0.0645855	0.0619537	0.0755597	0.0676322	0.0714732	0.331187	0.228902	0.217905	0.121975	0.131785	0.230041	0.233832	0.231193	0.115568	0.144772	0.43732	0.562523	0.314685	0.170533	0.186947	0.431333	0.409401	0.38345	0.173319	0.208131			500.8	0.133073	0.142719	0.142605	0.140523	0.14294	0.219217	0.129261	0.186152	0.205172	0.227943	0.292321	0.226347	0.335612	0.211789	0.264281	0.252782	0.160046	0.269053	0.232668	0.269752	0.352813
501	0.0662093	0.0636642	0.0758207	0.0692479	0.0726839	0.301752	0.212366	0.204646	0.121157	0.130166	0.222704	0.225853	0.224307	0.117835	0.145677	0.409016	0.506392	0.295552	0.165871	0.180446	0.413177	0.392211	0.367532	0.17325	0.203295			501	0.13584	0.145911	0.144195	0.144085	0.146504	0.210221	0.135992	0.181949	0.207383	0.229657	0.284482	0.226477	0.335719	0.215704	0.264901	0.246864	0.162599	0.266549	0.231345	0.267398	0.347929
501.2	0.0674717	0.0651017	0.0760326	0.070527	0.0736515	0.27996	0.199926	0.195204	0.12092	0.129545	0.217909	0.220499	0.21983	0.119819	0.146817	0.388109	0.464357	0.281161	0.162765	0.175764	0.400662	0.379304	0.355768	0.173218	0.200012			501.2	0.138066	0.148541	0.145531	0.146993	0.149412	0.20381	0.141221	0.179199	0.209481	0.231304	0.278867	0.226624	0.335943	0.219117	0.265796	0.242547	0.164635	0.265103	0.23041	0.265961	0.344499
501.4	0.0691685	0.0667764	0.0766244	0.0722964	0.0750383	0.258048	0.188537	0.185582	0.120986	0.129148	0.212504	0.215218	0.216005	0.122652	0.148373	0.366477	0.421497	0.266861	0.160249	0.171467	0.388172	0.367743	0.344201	0.173609	0.19699			501.4	0.141083	0.151923	0.147618	0.150769	0.153094	0.19731	0.147067	0.176724	0.212264	0.233845	0.273805	0.227772	0.337065	0.223392	0.267844	0.23856	0.167478	0.264359	0.230116	0.265572	0.34182
501.6	0.0705047	0.0681993	0.0771264	0.0737672	0.0761959	0.241724	0.180618	0.178042	0.121145	0.129159	0.208498	0.21143	0.212918	0.125092	0.1498	0.350949	0.389952	0.256315	0.158859	0.168596	0.379495	0.359403	0.336026	0.174156	0.194975			501.6	0.143487	0.154609	0.149276	0.15381	0.156142	0.192785	0.151718	0.175061	0.214627	0.236138	0.270429	0.228964	0.338421	0.226922	0.269748	0.235812	0.169969	0.263686	0.230302	0.265637	0.340016
501.8	0.07238	0.0701828	0.0780393	0.0756247	0.0777243	0.225586	0.171862	0.170573	0.121606	0.129573	0.206173	0.208058	0.209281	0.127951	0.151661	0.335073	0.358614	0.245553	0.157743	0.165924	0.370735	0.35147	0.328349	0.175542	0.193763			501.8	0.146749	0.158223	0.151739	0.157704	0.159952	0.188576	0.157704	0.173977	0.218267	0.239511	0.267395	0.230567	0.34066	0.231552	0.272918	0.233895	0.173042	0.264085	0.231157	0.266888	0.339233
502	0.0739166	0.0717584	0.0788875	0.0771306	0.0790299	0.21353	0.165518	0.165886	0.122436	0.13024	0.204564	0.205744	0.207006	0.130045	0.153375	0.323891	0.336421	0.238115	0.156843	0.164237	0.364796	0.345926	0.323007	0.176861	0.193333			502	0.149337	0.161242	0.153831	0.160866	0.163007	0.185724	0.162293	0.173438	0.221381	0.242347	0.265407	0.232211	0.34289	0.235356	0.275702	0.232705	0.175787	0.264739	0.231992	0.268238	0.339192
502.2	0.0757088	0.0737009	0.079962	0.0791318	0.0807577	0.201207	0.159356	0.161005	0.123943	0.131489	0.203729	0.204289	0.2066	0.133506	0.155882	0.313591	0.314601	0.231131	0.156667	0.163468	0.359967	0.340644	0.31881	0.179138	0.193781			502.2	0.152707	0.165025	0.156692	0.164925	0.167008	0.1834	0.167852	0.173455	0.225495	0.246532	0.264384	0.234627	0.346249	0.24043	0.279635	0.232331	0.179338	0.266668	0.234129	0.270676	0.3403
502.4	0.0771985	0.075387	0.0809797	0.0806995	0.0821887	0.192453	0.154875	0.157014	0.125324	0.132534	0.203439	0.203319	0.206444	0.136435	0.158233	0.30642	0.298512	0.226186	0.157045	0.16319	0.356846	0.336987	0.316076	0.180891	0.194305			502.4	0.155427	0.16813	0.158991	0.168125	0.170319	0.181931	0.172296	0.17376	0.228954	0.25004	0.264123	0.236693	0.349014	0.244487	0.282993	0.232245	0.182231	0.268271	0.236127	0.272839	0.341519
502.6	0.0793208	0.077469	0.0825347	0.0828515	0.0840994	0.184505	0.15131	0.153806	0.127275	0.134541	0.20368	0.203782	0.207082	0.139993	0.161135	0.299687	0.283892	0.221999	0.158314	0.163547	0.354509	0.334828	0.31489	0.183377	0.195792			502.6	0.158947	0.172097	0.161897	0.172349	0.174462	0.181031	0.177851	0.174527	0.233706	0.25477	0.26473	0.239726	0.353071	0.249815	0.287647	0.233139	0.185781	0.270561	0.239299	0.276249	0.343979
502.8	0.0810335	0.0792085	0.0838582	0.0845476	0.0856661	0.178991	0.149175	0.151867	0.129159	0.136093	0.204608	0.204426	0.207795	0.14288	0.163615	0.294862	0.273553	0.219044	0.159617	0.164187	0.353428	0.333601	0.31421	0.185805	0.197273			502.8	0.161795	0.175394	0.164284	0.175754	0.177771	0.180633	0.182288	0.175323	0.237559	0.258647	0.265451	0.242358	0.356929	0.254164	0.291615	0.234092	0.188572	0.272534	0.241874	0.279099	0.346233
503	0.0832796	0.0814187	0.0855866	0.0867715	0.087735	0.174452	0.146828	0.150582	0.131649	0.13845	0.205993	0.205532	0.208953	0.146351	0.167108	0.291555	0.264115	0.217051	0.161497	0.165634	0.353611	0.333878	0.314972	0.189488	0.19982			503	0.165416	0.179483	0.167619	0.179999	0.182013	0.181026	0.187771	0.176859	0.242462	0.26379	0.267188	0.245924	0.361972	0.259605	0.297141	0.236074	0.192271	0.275721	0.245595	0.283381	0.349699
503.2	0.0850499	0.0832467	0.0870586	0.0886317	0.0894538	0.171479	0.145422	0.149719	0.1337	0.140471	0.207314	0.2068	0.210307	0.149119	0.170204	0.289708	0.257493	0.215762	0.163139	0.167078	0.354411	0.334784	0.316015	0.192438	0.201893			503.2	0.168321	0.182755	0.170341	0.183474	0.185436	0.181548	0.192154	0.178338	0.246513	0.267978	0.268884	0.249039	0.365947	0.264081	0.301746	0.237899	0.195493	0.278465	0.248737	0.287014	0.352799
503.4	0.0874768	0.0855487	0.0889989	0.0910154	0.0917219	0.168892	0.144639	0.149502	0.136533	0.143078	0.209807	0.208966	0.212368	0.152717	0.17409	0.288774	0.251603	0.215593	0.165752	0.169053	0.356404	0.336574	0.317809	0.1964	0.204807			503.4	0.172086	0.187079	0.173804	0.187934	0.189775	0.182943	0.197671	0.180602	0.25175	0.27369	0.271707	0.252843	0.371415	0.269892	0.30782	0.240634	0.199573	0.282326	0.252898	0.292036	0.357483
503.6	0.0893672	0.0872991	0.0905918	0.0929571	0.093606	0.167179	0.144542	0.149617	0.138777	0.145291	0.212227	0.211132	0.214468	0.155743	0.17726	0.288597	0.247627	0.215588	0.168141	0.170876	0.358519	0.338338	0.319967	0.199567	0.207402			503.6	0.175162	0.190575	0.176634	0.191534	0.193341	0.184265	0.201922	0.182477	0.256033	0.278404	0.274166	0.256059	0.375921	0.274678	0.312828	0.242924	0.202926	0.285554	0.256547	0.296233	0.361406
503.8	0.0918696	0.0898168	0.092658	0.0954437	0.0960621	0.166309	0.145233	0.150311	0.141657	0.148308	0.215119	0.213875	0.217602	0.159558	0.181529	0.289346	0.244775	0.217244	0.171254	0.173858	0.36252	0.341228	0.323362	0.203956	0.210978			503.8	0.179074	0.194961	0.180413	0.196104	0.197853	0.186333	0.207131	0.185112	0.261711	0.284264	0.277699	0.260453	0.382175	0.280789	0.319243	0.246176	0.207114	0.289785	0.261204	0.301692	0.366837
504	0.0938636	0.0918023	0.0942513	0.0973827	0.0979909	0.165902	0.145761	0.151226	0.144104	0.150799	0.21785	0.216464	0.220248	0.16276	0.184925	0.290566	0.242955	0.218481	0.173946	0.176348	0.365998	0.343639	0.326105	0.207611	0.214018			504	0.182229	0.198538	0.183405	0.199752	0.201462	0.188116	0.211273	0.187264	0.266241	0.289052	0.280681	0.264043	0.387301	0.285667	0.324349	0.249003	0.21053	0.293556	0.264986	0.306215	0.371167
504.2	0.0964392	0.0942256	0.0967083	0.100069	0.100637	0.166342	0.147195	0.152995	0.147446	0.154283	0.221096	0.220243	0.223774	0.166837	0.189452	0.293165	0.242149	0.220919	0.177399	0.179757	0.370584	0.347735	0.330475	0.212356	0.21826			504.2	0.186382	0.203177	0.187439	0.204612	0.206154	0.190679	0.216431	0.190361	0.272068	0.295488	0.284745	0.268343	0.393829	0.292035	0.331139	0.252784	0.214807	0.29834	0.269912	0.312369	0.376934
504.4	0.0985124	0.0963297	0.0985109	0.102192	0.102691	0.16699	0.148248	0.154604	0.15024	0.157215	0.22397	0.22319	0.226606	0.170139	0.193021	0.295695	0.241827	0.22267	0.180322	0.182595	0.374701	0.351485	0.3343	0.21633	0.221808			504.4	0.189758	0.206983	0.190576	0.208514	0.209911	0.192892	0.220537	0.193014	0.276998	0.300626	0.288139	0.27191	0.399117	0.297036	0.336725	0.25594	0.218424	0.302265	0.274107	0.317416	0.381581
504.6	0.101216	0.0988906	0.100965	0.104949	0.105353	0.168771	0.150024	0.15727	0.153911	0.160943	0.227968	0.227264	0.230494	0.174498	0.197582	0.299083	0.242552	0.2259	0.184048	0.18654	0.380461	0.356696	0.339146	0.221398	0.22641			504.6	0.193964	0.21166	0.194656	0.213325	0.214687	0.196017	0.225635	0.196315	0.282944	0.307087	0.292727	0.276657	0.405989	0.30323	0.34387	0.260256	0.223022	0.307259	0.279447	0.323936	0.387713
504.8	0.103357	0.101107	0.102934	0.107247	0.107542	0.170359	0.151591	0.159322	0.156834	0.163946	0.231097	0.230623	0.233828	0.178001	0.201272	0.302353	0.243168	0.228651	0.187172	0.189767	0.385205	0.361084	0.343574	0.225458	0.230304			504.8	0.197358	0.21539	0.197805	0.217195	0.218554	0.198635	0.229792	0.199106	0.288056	0.312404	0.296489	0.280504	0.411499	0.308459	0.349631	0.263745	0.226711	0.311368	0.283851	0.329088	0.392683
505	0.106153	0.103978	0.105704	0.110038	0.110318	0.172473	0.153705	0.162179	0.160642	0.167732	0.23555	0.234976	0.238409	0.182416	0.206098	0.306829	0.245205	0.232252	0.19119	0.194055	0.391329	0.367072	0.349281	0.230538	0.235294			505	0.201593	0.220374	0.202126	0.222026	0.223425	0.20212	0.235023	0.2027	0.294447	0.319205	0.301436	0.285569	0.418569	0.31521	0.356932	0.268375	0.231568	0.316735	0.289419	0.335895	0.399249
505.2	0.108535	0.106241	0.107979	0.112318	0.11263	0.174567	0.155763	0.164649	0.163824	0.170835	0.239057	0.238548	0.24196	0.185971	0.210027	0.310756	0.24688	0.235247	0.194618	0.197351	0.396652	0.371906	0.35401	0.234719	0.239504			505.2	0.205048	0.224334	0.20545	0.226054	0.227366	0.205047	0.239274	0.205594	0.299554	0.324744	0.305382	0.289719	0.424574	0.320587	0.362961	0.272086	0.235419	0.321255	0.293978	0.341489	0.404646
505.4	0.111517	0.109109	0.110772	0.115378	0.115605	0.177462	0.158796	0.167753	0.16784	0.175029	0.243778	0.243158	0.246624	0.190323	0.215116	0.315638	0.249526	0.239115	0.199101	0.201839	0.403564	0.378127	0.360033	0.240013	0.244976			505.4	0.209447	0.229327	0.209821	0.2312	0.232404	0.20884	0.244572	0.209453	0.306091	0.331869	0.310712	0.294982	0.432169	0.327435	0.370622	0.276957	0.240304	0.326714	0.299754	0.34854	0.411703
505.6	0.113926	0.111528	0.113095	0.117951	0.118046	0.179786	0.161148	0.170296	0.171176	0.178332	0.247666	0.247009	0.250254	0.193839	0.219297	0.319554	0.251793	0.242387	0.202804	0.2055	0.409238	0.383586	0.365054	0.244461	0.249311			505.6	0.213023	0.233503	0.213214	0.235314	0.236432	0.211863	0.248803	0.212642	0.311205	0.337616	0.314886	0.299107	0.438059	0.332863	0.376772	0.280835	0.244121	0.331117	0.304454	0.354183	0.417331
505.8	0.117166	0.114522	0.116112	0.12114	0.121072	0.183411	0.164507	0.173903	0.175324	0.182782	0.25241	0.252287	0.255476	0.198566	0.224618	0.325014	0.254862	0.246928	0.207438	0.210012	0.416524	0.390617	0.371999	0.25026	0.254972			505.8	0.217566	0.238697	0.217886	0.240623	0.241517	0.215911	0.254195	0.216498	0.317815	0.344769	0.320241	0.304378	0.445857	0.339769	0.384705	0.28588	0.249064	0.336873	0.310507	0.361446	0.424435
506	0.11984	0.116939	0.11867	0.123589	0.123537	0.186298	0.167309	0.176909	0.178722	0.186315	0.256569	0.256251	0.259559	0.202374	0.229	0.329357	0.257649	0.250501	0.211148	0.213672	0.422587	0.396492	0.377448	0.254941	0.259566			506	0.221269	0.24279	0.221589	0.244847	0.245671	0.21919	0.25861	0.219548	0.323158	0.350516	0.32459	0.308529	0.452191	0.345509	0.391101	0.289944	0.253011	0.341434	0.315083	0.367221	0.430173
506.2	0.123117	0.120063	0.121747	0.126786	0.126803	0.189974	0.170506	0.180863	0.183102	0.191009	0.261552	0.261123	0.264867	0.207282	0.234443	0.335265	0.261328	0.25555	0.215842	0.218686	0.430007	0.404071	0.384536	0.260771	0.265482			506.2	0.225962	0.248	0.226306	0.25024	0.251028	0.223449	0.264072	0.223861	0.329727	0.358052	0.330437	0.31408	0.4599	0.352747	0.399189	0.295186	0.258112	0.347246	0.321138	0.374817	0.437642
506.4	0.125618	0.122476	0.124274	0.129483	0.129403	0.19318	0.173198	0.183954	0.186632	0.194795	0.265754	0.26549	0.269134	0.211199	0.23901	0.339994	0.26476	0.259501	0.219718	0.22273	0.436295	0.409987	0.390162	0.265555	0.270153			506.4	0.229729	0.252242	0.230074	0.254597	0.255249	0.226874	0.268596	0.227352	0.335102	0.364087	0.335119	0.318392	0.466232	0.358491	0.405602	0.299357	0.262177	0.351969	0.326111	0.380868	0.44354
506.6	0.1289	0.125614	0.127433	0.132826	0.132734	0.197174	0.176913	0.187937	0.191228	0.199511	0.271108	0.270688	0.274859	0.216253	0.244496	0.346401	0.269196	0.264558	0.224826	0.227889	0.444089	0.417513	0.397682	0.271385	0.276112			506.6	0.234556	0.257761	0.23487	0.260103	0.260653	0.231162	0.274114	0.231791	0.341955	0.371645	0.340911	0.323932	0.474417	0.365712	0.413853	0.304636	0.267235	0.358199	0.332307	0.388559	0.451137
506.8	0.131488	0.128115	0.130024	0.135516	0.135359	0.200551	0.18001	0.191126	0.194937	0.203379	0.275452	0.274889	0.279339	0.220273	0.248928	0.35163	0.272847	0.268526	0.228929	0.231967	0.450718	0.423723	0.403887	0.276243	0.281026			506.8	0.238496	0.26216	0.238755	0.264551	0.265037	0.234696	0.278731	0.235366	0.347399	0.377698	0.345626	0.328324	0.480836	0.37147	0.420509	0.308913	0.271464	0.363062	0.337404	0.394748	0.457341
507	0.135008	0.13162	0.133445	0.139075	0.138838	0.204994	0.184226	0.195326	0.199579	0.208235	0.28142	0.280408	0.285546	0.225427	0.254731	0.358493	0.278051	0.273812	0.234128	0.237462	0.45897	0.431694	0.411651	0.282672	0.287295			507	0.243396	0.26785	0.243561	0.270018	0.270503	0.23908	0.284518	0.239578	0.354301	0.385419	0.351634	0.334102	0.488933	0.37874	0.42893	0.314549	0.276583	0.369172	0.34376	0.402475	0.465062
507.2	0.137836	0.134434	0.136254	0.142022	0.141652	0.208417	0.187653	0.198927	0.203466	0.212087	0.286156	0.285067	0.290431	0.229651	0.259283	0.364014	0.282168	0.278276	0.238493	0.241846	0.46556	0.438389	0.4181	0.287604	0.292552			507.2	0.247335	0.272435	0.247336	0.274446	0.274894	0.242688	0.289232	0.243062	0.359918	0.391626	0.356374	0.338628	0.495743	0.384697	0.435799	0.319117	0.280785	0.374184	0.348864	0.408906	0.471264
507.4	0.141489	0.137917	0.140037	0.145831	0.145161	0.213023	0.192015	0.203486	0.208288	0.217198	0.292041	0.290754	0.29654	0.235089	0.265261	0.370864	0.287343	0.283844	0.243909	0.247411	0.473996	0.446883	0.425879	0.294164	0.299057			507.4	0.252168	0.278077	0.252415	0.280098	0.280518	0.247342	0.295096	0.247874	0.367133	0.399476	0.362695	0.344671	0.504125	0.392287	0.444474	0.324721	0.286013	0.38036	0.355223	0.416968	0.479176
507.6	0.144381	0.14084	0.14294	0.148774	0.148028	0.216588	0.195603	0.207112	0.212086	0.221253	0.296947	0.295577	0.301267	0.239486	0.269951	0.376659	0.291615	0.288127	0.248402	0.251897	0.480516	0.453839	0.432222	0.299258	0.304275			507.6	0.256059	0.282598	0.256496	0.284771	0.284981	0.251141	0.299796	0.251716	0.372739	0.405762	0.367707	0.349501	0.510737	0.398252	0.451485	0.329253	0.290355	0.385193	0.360488	0.423357	0.485601
507.8	0.147252	0.143758	0.14589	0.151879	0.151127	0.220297	0.199218	0.210739	0.21605	0.225233	0.301811	0.300461	0.306233	0.24379	0.274871	0.382418	0.296042	0.292685	0.252831	0.256446	0.487652	0.460721	0.438818	0.30441	0.309579			507.8	0.260039	0.287119	0.260575	0.289373	0.289654	0.255016	0.304547	0.255473	0.378405	0.412184	0.372775	0.354226	0.517739	0.404373	0.458489	0.333768	0.294724	0.390409	0.365671	0.429785	0.49228
508	0.15101	0.147515	0.149651	0.15573	0.154992	0.225049	0.203761	0.215266	0.220974	0.230255	0.30778	0.306295	0.31265	0.249227	0.281247	0.389759	0.301602	0.29835	0.258597	0.262239	0.496694	0.469395	0.447287	0.311023	0.31627			508	0.265072	0.293063	0.265691	0.295267	0.295473	0.259839	0.31045	0.260315	0.385665	0.420393	0.379112	0.359955	0.526349	0.412024	0.467282	0.339478	0.30028	0.396947	0.372274	0.437823	0.500627
508.2	0.154038	0.150548	0.152724	0.158711	0.158043	0.228951	0.207361	0.218695	0.224994	0.234512	0.312713	0.31155	0.317588	0.25384	0.286406	0.395483	0.306313	0.302713	0.263129	0.266886	0.503851	0.476303	0.454119	0.316564	0.321621			508.2	0.269221	0.297791	0.269817	0.300042	0.300113	0.263762	0.315167	0.264104	0.39129	0.426881	0.384312	0.364537	0.533398	0.418087	0.47426	0.344002	0.304641	0.402192	0.377565	0.444409	0.507284
508.4	0.158107	0.154331	0.156622	0.162455	0.161836	0.233964	0.212093	0.223343	0.230183	0.239839	0.318841	0.317679	0.323641	0.259506	0.292815	0.403146	0.312228	0.308361	0.269028	0.272757	0.513064	0.485153	0.46271	0.323566	0.328504			508.4	0.274405	0.303566	0.274988	0.306098	0.30602	0.268734	0.321117	0.269046	0.398502	0.434992	0.390711	0.370317	0.542369	0.425688	0.48314	0.349737	0.309994	0.408681	0.38436	0.452626	0.515644
508.6	0.162791	0.158913	0.161536	0.167211	0.166594	0.239883	0.217344	0.229205	0.236207	0.246373	0.326627	0.325166	0.331546	0.266423	0.300523	0.411797	0.319375	0.315763	0.276215	0.279976	0.52391	0.496168	0.473018	0.331816	0.336635			508.6	0.280604	0.310707	0.281223	0.313208	0.31306	0.27453	0.32835	0.274899	0.407326	0.444701	0.398535	0.377478	0.552719	0.434775	0.493685	0.356699	0.316459	0.416356	0.392434	0.462525	0.525704
508.8	0.16536	0.161387	0.163864	0.169676	0.169001	0.242825	0.220328	0.232111	0.239337	0.249525	0.330475	0.32877	0.335715	0.269936	0.304609	0.416194	0.322602	0.31927	0.279928	0.283581	0.529533	0.501548	0.478165	0.33612	0.340745			508.8	0.283775	0.31439	0.284517	0.316849	0.316571	0.277326	0.331992	0.277949	0.411644	0.449544	0.402328	0.381037	0.557833	0.439559	0.499009	0.360138	0.319739	0.420307	0.396627	0.467575	0.53065
509	0.170339	0.16611	0.168649	0.174564	0.173788	0.249081	0.226067	0.237976	0.245788	0.256176	0.33802	0.336859	0.343769	0.276935	0.312592	0.425401	0.329653	0.326752	0.28743	0.291021	0.540933	0.512266	0.48903	0.344658	0.34928			509	0.290127	0.321285	0.291123	0.324097	0.323947	0.28338	0.33949	0.284039	0.420571	0.459385	0.410169	0.388522	0.568548	0.44867	0.509704	0.367269	0.326529	0.428663	0.405012	0.477544	0.540702
509.2	0.172712	0.16838	0.171162	0.177038	0.176161	0.25182	0.228847	0.241002	0.249112	0.259495	0.341953	0.340591	0.347627	0.280518	0.31657	0.429843	0.333331	0.330525	0.291061	0.294907	0.546555	0.517827	0.494145	0.348919	0.3536			509.2	0.293373	0.324855	0.294127	0.327567	0.327632	0.286363	0.343315	0.287183	0.425127	0.464349	0.414157	0.392071	0.573802	0.453249	0.515067	0.370857	0.329851	0.432796	0.408955	0.482558	0.545832
509.4	0.177342	0.173398	0.175922	0.182045	0.18121	0.257982	0.234652	0.247172	0.255483	0.266447	0.349701	0.348607	0.355714	0.287804	0.324826	0.438912	0.340431	0.337964	0.298528	0.302496	0.5575	0.528761	0.504563	0.357516	0.362518			509.4	0.299769	0.332453	0.300478	0.334874	0.334855	0.292283	0.350569	0.293447	0.434002	0.474146	0.42211	0.399773	0.584647	0.462563	0.525798	0.377994	0.336593	0.440992	0.417368	0.492588	0.555965
509.6	0.179873	0.175896	0.178369	0.18464	0.183746	0.261079	0.237609	0.250178	0.258736	0.26985	0.353733	0.352733	0.359854	0.291455	0.329015	0.443507	0.344421	0.341559	0.302387	0.306274	0.563094	0.534161	0.510062	0.3618	0.366819			509.6	0.302996	0.336147	0.303678	0.338444	0.338339	0.295411	0.354322	0.296639	0.438671	0.479041	0.425901	0.40345	0.589997	0.467305	0.531164	0.381559	0.339951	0.445001	0.421546	0.497473	0.561067
509.8	0.185034	0.181286	0.183487	0.18971	0.188961	0.267336	0.243648	0.256511	0.265431	0.276655	0.361631	0.360666	0.368215	0.299069	0.33715	0.453008	0.351608	0.348757	0.309822	0.313815	0.574306	0.545428	0.521034	0.370751	0.375709			509.8	0.30933	0.343479	0.310445	0.346032	0.345689	0.301537	0.361665	0.302747	0.447621	0.488859	0.43375	0.411086	0.600364	0.476838	0.54203	0.38879	0.346749	0.45342	0.430154	0.507411	0.571384
510	0.18737	0.183807	0.186178	0.192339	0.191462	0.27034	0.246767	0.259617	0.268755	0.280205	0.365788	0.364887	0.372099	0.302823	0.341422	0.457742	0.355438	0.352372	0.313698	0.317568	0.580228	0.551288	0.526763	0.375498	0.380356			510	0.312608	0.347085	0.31363	0.349653	0.349432	0.304774	0.3655	0.305954	0.452239	0.493841	0.437797	0.414854	0.605953	0.481472	0.54753	0.392373	0.350223	0.457614	0.434239	0.51239	0.576595
510.2	0.192512	0.189194	0.191745	0.197699	0.196713	0.276363	0.252944	0.266419	0.275514	0.287173	0.374235	0.373265	0.38059	0.310493	0.350247	0.467273	0.363289	0.36002	0.321498	0.325584	0.592121	0.56259	0.537981	0.384595	0.389199			510.2	0.319181	0.354478	0.320244	0.357015	0.356656	0.311009	0.373077	0.312202	0.461279	0.503696	0.445741	0.422429	0.616778	0.491026	0.558443	0.39982	0.357031	0.46625	0.442866	0.522338	0.586939
510.4	0.19508	0.191755	0.194456	0.200456	0.199339	0.27966	0.25607	0.269624	0.278917	0.290737	0.378248	0.377616	0.384634	0.314386	0.354575	0.471946	0.366871	0.363991	0.325418	0.329549	0.598322	0.56834	0.543766	0.388985	0.393772			510.4	0.322483	0.358143	0.323493	0.360891	0.360381	0.314183	0.376848	0.315503	0.465861	0.508564	0.449787	0.42605	0.622366	0.495795	0.56401	0.403482	0.360432	0.470359	0.446949	0.527366	0.591986
510.6	0.200479	0.197096	0.199828	0.205697	0.204528	0.286428	0.262005	0.27592	0.285579	0.29796	0.386165	0.385769	0.392909	0.322179	0.363242	0.481547	0.37404	0.371508	0.332921	0.337479	0.610521	0.579263	0.554594	0.398557	0.402666			510.6	0.329109	0.365578	0.330352	0.368328	0.367692	0.320478	0.384297	0.322067	0.47498	0.51844	0.457932	0.433559	0.633141	0.505103	0.574655	0.410659	0.367315	0.478829	0.455274	0.537138	0.602275
510.8	0.203039	0.19974	0.202374	0.208246	0.207189	0.289689	0.264919	0.279118	0.28908	0.301401	0.390202	0.389883	0.397134	0.325943	0.367567	0.486201	0.377687	0.37524	0.337019	0.34139	0.616332	0.585129	0.560175	0.403147	0.407232			510.8	0.332457	0.369299	0.333563	0.372052	0.371276	0.323564	0.388081	0.325185	0.479479	0.523258	0.461889	0.437353	0.638391	0.50983	0.579975	0.414352	0.370709	0.483009	0.459607	0.542059	0.607414
511	0.208532	0.205307	0.207753	0.213864	0.21256	0.296276	0.270845	0.285672	0.296382	0.30892	0.398583	0.397881	0.405952	0.333516	0.376422	0.495657	0.385507	0.382976	0.344928	0.349612	0.628274	0.596501	0.571355	0.412509	0.416535			511	0.339213	0.376958	0.340062	0.379487	0.37869	0.329899	0.395579	0.331592	0.488565	0.533018	0.469738	0.445218	0.649462	0.519288	0.590585	0.421846	0.377533	0.491448	0.468161	0.552031	0.617606
511.2	0.211285	0.207991	0.21049	0.216562	0.215309	0.29945	0.273922	0.288861	0.299848	0.312597	0.402853	0.401983	0.410267	0.33752	0.380916	0.500659	0.389301	0.387155	0.348994	0.3536	0.634286	0.60216	0.576575	0.417403	0.421097			511.2	0.342635	0.380764	0.343329	0.383204	0.38232	0.333028	0.3995	0.33503	0.493132	0.537867	0.473713	0.449128	0.654713	0.523958	0.595887	0.425616	0.380973	0.495378	0.472361	0.55706	0.622535
511.4	0.216977	0.21362	0.216092	0.221924	0.220608	0.306273	0.279971	0.295678	0.307027	0.319924	0.411419	0.410401	0.418752	0.345571	0.389743	0.510508	0.397406	0.394774	0.357107	0.361763	0.645692	0.613943	0.587892	0.426671	0.430582			511.4	0.349326	0.38828	0.349993	0.390427	0.389655	0.339279	0.407335	0.341606	0.501871	0.547391	0.48155	0.456749	0.665377	0.533344	0.606322	0.432988	0.387831	0.503391	0.48069	0.567006	0.632805
511.6	0.219632	0.216564	0.218969	0.224678	0.223412	0.309499	0.283089	0.299177	0.310612	0.323697	0.415713	0.414516	0.42275	0.349451	0.394125	0.515077	0.401585	0.398788	0.36126	0.365827	0.651548	0.61942	0.593472	0.431206	0.435182			511.6	0.352642	0.392033	0.353458	0.394138	0.393278	0.342512	0.411241	0.344939	0.506328	0.552214	0.485681	0.460704	0.670694	0.53805	0.61159	0.436625	0.391164	0.507675	0.484907	0.571814	0.637946
511.8	0.225204	0.222138	0.224209	0.230463	0.229262	0.315931	0.289732	0.306131	0.317569	0.331006	0.423973	0.423493	0.431717	0.357304	0.403361	0.524365	0.409645	0.406538	0.369754	0.373994	0.663282	0.631196	0.605005	0.440851	0.444643			511.8	0.359278	0.399661	0.360211	0.401512	0.400711	0.348762	0.418572	0.351346	0.515261	0.561793	0.493568	0.468654	0.681502	0.547245	0.622205	0.444236	0.39813	0.516049	0.493325	0.5815	0.648494
512	0.227912	0.224799	0.226738	0.233271	0.232035	0.319372	0.292927	0.30955	0.321286	0.334988	0.428007	0.427599	0.436169	0.361196	0.407985	0.52951	0.413602	0.410549	0.373765	0.378158	0.669447	0.637249	0.610714	0.445649	0.449475			512	0.362576	0.403479	0.36382	0.405164	0.404406	0.352006	0.422164	0.354784	0.51962	0.566355	0.497439	0.472657	0.686819	0.551888	0.627549	0.448014	0.401405	0.520469	0.497474	0.586211	0.653516
512.2	0.233357	0.230429	0.23231	0.238818	0.237807	0.32642	0.299564	0.316407	0.328738	0.342611	0.436108	0.436654	0.444907	0.36945	0.417098	0.539787	0.421926	0.418696	0.381756	0.386587	0.681183	0.649091	0.622236	0.455384	0.459197			512.2	0.369344	0.410812	0.370484	0.412654	0.411839	0.35842	0.429764	0.361411	0.528505	0.57587	0.50538	0.480213	0.698091	0.561086	0.637939	0.455433	0.408228	0.528532	0.505707	0.595612	0.663573
512.4	0.236322	0.233263	0.235326	0.241556	0.240652	0.329707	0.302965	0.320015	0.332322	0.346285	0.440377	0.440885	0.449541	0.373563	0.421791	0.545099	0.425906	0.422365	0.385932	0.390863	0.686929	0.655006	0.62793	0.46036	0.464369			512.4	0.372684	0.414726	0.373896	0.41636	0.4154	0.361569	0.433635	0.36473	0.532941	0.580587	0.509419	0.483993	0.703824	0.565757	0.643098	0.459171	0.411584	0.532745	0.509803	0.600369	0.668728
512.6	0.242162	0.239322	0.241032	0.247207	0.246331	0.336941	0.309416	0.327118	0.339536	0.353988	0.448961	0.449307	0.458558	0.381731	0.431144	0.55523	0.434058	0.430128	0.394172	0.399386	0.699072	0.666831	0.639557	0.470211	0.474192			512.6	0.379239	0.422244	0.380695	0.423997	0.422676	0.368096	0.441045	0.371279	0.54171	0.589976	0.517471	0.491556	0.714352	0.575167	0.653234	0.466532	0.418443	0.541104	0.518	0.609909	0.678814
512.8	0.245288	0.242357	0.244029	0.250173	0.249346	0.34018	0.312965	0.330709	0.343336	0.357908	0.453329	0.453432	0.46307	0.385773	0.435802	0.560164	0.438147	0.434161	0.398393	0.403662	0.705292	0.672652	0.645383	0.475056	0.479004			512.8	0.382525	0.425788	0.384199	0.427714	0.426319	0.371363	0.444792	0.374637	0.546188	0.594578	0.521514	0.495269	0.719482	0.579813	0.65833	0.470171	0.421709	0.54532	0.522152	0.614945	0.683918
513	0.251176	0.2483	0.250045	0.256063	0.255015	0.347053	0.319669	0.337639	0.350771	0.365579	0.462042	0.462341	0.471848	0.393856	0.444932	0.570709	0.446434	0.442261	0.406865	0.412139	0.717594	0.683984	0.656654	0.485191	0.488563			513	0.389157	0.433213	0.391399	0.43506	0.433494	0.377708	0.452214	0.38141	0.554788	0.60386	0.529639	0.502955	0.730214	0.588681	0.668327	0.477605	0.428526	0.55341	0.530479	0.624265	0.693817
513.2	0.254144	0.251204	0.253198	0.258989	0.257951	0.350571	0.32303	0.341153	0.354446	0.369558	0.466458	0.466766	0.476373	0.397973	0.449519	0.575941	0.450735	0.446411	0.411019	0.416556	0.723829	0.690091	0.662569	0.490224	0.493363			513.2	0.392524	0.436902	0.394714	0.43861	0.437082	0.38095	0.455954	0.384943	0.559006	0.608476	0.533546	0.506805	0.735928	0.593104	0.673366	0.481282	0.432003	0.55744	0.534643	0.628994	0.698979
513.4	0.260323	0.257291	0.259061	0.264929	0.263797	0.358008	0.329551	0.348335	0.362375	0.377371	0.47436	0.475428	0.485268	0.406025	0.458823	0.585916	0.459315	0.455014	0.419427	0.425059	0.735836	0.702235	0.673431	0.499919	0.503193			513.4	0.399175	0.444456	0.40138	0.445713	0.444184	0.387277	0.463582	0.391803	0.567409	0.617459	0.541562	0.514274	0.746606	0.602296	0.683116	0.488688	0.438836	0.565498	0.542585	0.638113	0.708943
513.6	0.265543	0.262207	0.263862	0.269837	0.268662	0.36406	0.33486	0.354226	0.368786	0.383916	0.481311	0.482765	0.492528	0.412831	0.466544	0.594567	0.466223	0.46169	0.426374	0.432124	0.745742	0.711903	0.682515	0.508231	0.511365			513.6	0.404591	0.450557	0.40712	0.451678	0.450134	0.392502	0.469345	0.397494	0.57447	0.625011	0.548053	0.520773	0.755753	0.60967	0.691268	0.494747	0.444544	0.572495	0.549199	0.645738	0.717301
513.8	0.269719	0.266223	0.267716	0.273885	0.272586	0.368918	0.339332	0.359014	0.373865	0.389061	0.486973	0.488405	0.498524	0.418223	0.472796	0.601295	0.471867	0.466984	0.431838	0.437869	0.753437	0.719847	0.689843	0.515085	0.517934			513.8	0.408956	0.45541	0.411615	0.456476	0.454916	0.396757	0.47401	0.402268	0.580103	0.630968	0.553342	0.525869	0.763014	0.61566	0.697814	0.499618	0.449273	0.578142	0.554453	0.651773	0.724005
514	0.274881	0.271293	0.272539	0.278786	0.277638	0.374839	0.344881	0.365271	0.380228	0.395517	0.494006	0.495574	0.505662	0.42498	0.480629	0.609467	0.479265	0.473902	0.43906	0.445279	0.763384	0.729935	0.69955	0.523298	0.526156			514	0.414333	0.461583	0.417228	0.462464	0.460859	0.402034	0.479933	0.407893	0.587137	0.638285	0.559818	0.532146	0.772184	0.622934	0.705807	0.505898	0.455092	0.584865	0.561034	0.65921	0.73235
514.2	0.278966	0.275194	0.276544	0.282848	0.281807	0.379691	0.349361	0.3702	0.385427	0.400785	0.499651	0.501281	0.511631	0.430396	0.486938	0.616167	0.485211	0.479427	0.444794	0.451074	0.771228	0.738121	0.707206	0.529916	0.53277			514.2	0.418701	0.466333	0.421928	0.467146	0.465619	0.406273	0.48462	0.412599	0.592568	0.644045	0.564911	0.537126	0.779598	0.628647	0.712074	0.51085	0.459747	0.590318	0.566261	0.665007	0.739055
514.4	0.283991	0.280213	0.281765	0.287935	0.286821	0.385997	0.354957	0.376103	0.391685	0.407265	0.506541	0.508874	0.519007	0.43702	0.494874	0.624628	0.491903	0.486249	0.451942	0.458333	0.781535	0.747914	0.717012	0.538567	0.540884			514.4	0.424143	0.472294	0.427698	0.472785	0.471397	0.411603	0.490456	0.418273	0.59942	0.651113	0.571432	0.543342	0.788137	0.635869	0.719737	0.516791	0.465175	0.59705	0.572627	0.672205	0.747279
514.6	0.288247	0.284264	0.2857	0.291965	0.29092	0.390992	0.359547	0.380892	0.396741	0.412443	0.512078	0.514762	0.524947	0.44252	0.501126	0.631244	0.497492	0.491773	0.457579	0.464171	0.789757	0.755842	0.724678	0.545342	0.547677			514.6	0.4285	0.477086	0.432289	0.477357	0.475981	0.415751	0.495184	0.422836	0.604822	0.656766	0.576651	0.5482	0.79507	0.641837	0.725757	0.521476	0.469543	0.602486	0.577757	0.677897	0.753839
514.8	0.293431	0.28952	0.290715	0.297129	0.296117	0.396952	0.365329	0.386762	0.403143	0.41922	0.519145	0.521945	0.532656	0.44929	0.50895	0.639677	0.504474	0.49893	0.464768	0.471504	0.799846	0.76551	0.734215	0.553994	0.556043			514.8	0.433815	0.48298	0.437946	0.483291	0.481615	0.420988	0.501025	0.4286	0.611474	0.663561	0.583122	0.554495	0.803927	0.648997	0.733347	0.527516	0.475245	0.60968	0.584005	0.68492	0.76192
515	0.297623	0.293486	0.294656	0.30133	0.300159	0.401781	0.37007	0.391438	0.408172	0.424416	0.524702	0.527819	0.539003	0.454875	0.515257	0.646466	0.509988	0.504424	0.470427	0.477248	0.80792	0.773252	0.741651	0.560811	0.562856			515	0.438113	0.487768	0.442538	0.487913	0.486028	0.425191	0.505761	0.433268	0.616786	0.668964	0.588214	0.559568	0.810924	0.654565	0.739371	0.532461	0.479716	0.615254	0.589146	0.690486	0.768376
515.2	0.302934	0.298778	0.299864	0.306482	0.30508	0.408375	0.375595	0.397507	0.41472	0.431064	0.53185	0.535066	0.546836	0.461987	0.523227	0.654851	0.516928	0.511462	0.477495	0.48459	0.817555	0.782758	0.751073	0.569058	0.571362			515.2	0.443578	0.493822	0.4479	0.493551	0.491661	0.430557	0.511899	0.439333	0.623199	0.675847	0.594686	0.565798	0.81989	0.66161	0.746914	0.538518	0.485317	0.622326	0.595436	0.697377	0.776376
515.4	0.307399	0.303041	0.304093	0.310485	0.30908	0.413292	0.380149	0.402369	0.419961	0.436339	0.537468	0.541042	0.552893	0.467599	0.529539	0.661549	0.522367	0.517151	0.483249	0.490604	0.825266	0.790362	0.75886	0.575641	0.578116			515.4	0.44795	0.498586	0.452304	0.498123	0.496106	0.43493	0.516789	0.443898	0.628628	0.681234	0.599879	0.570582	0.827286	0.667144	0.752868	0.543411	0.489972	0.627812	0.600478	0.702805	0.782751
515.6	0.312574	0.308404	0.309414	0.315843	0.314205	0.419342	0.385903	0.408279	0.426345	0.442937	0.544835	0.548602	0.559861	0.474391	0.537484	0.669898	0.529231	0.524133	0.490694	0.497903	0.835249	0.800273	0.768268	0.584013	0.586464			515.6	0.45327	0.504228	0.457981	0.503587	0.501633	0.44047	0.522447	0.44931	0.635173	0.687732	0.606302	0.576931	0.835765	0.674098	0.760102	0.549513	0.49561	0.634712	0.606657	0.709483	0.790674
515.8	0.316627	0.31283	0.313451	0.320136	0.318301	0.424478	0.390317	0.413237	0.431443	0.448381	0.550601	0.554568	0.565575	0.479817	0.54388	0.676357	0.534793	0.529725	0.496436	0.503767	0.843162	0.807812	0.775959	0.590631	0.592991			515.8	0.457469	0.508862	0.462562	0.507786	0.505931	0.444886	0.526959	0.453821	0.640225	0.692875	0.611448	0.581944	0.842458	0.679574	0.765959	0.554254	0.500075	0.640103	0.611628	0.714815	0.797025
516	0.32097	0.316952	0.317771	0.324403	0.322484	0.429305	0.3948	0.41811	0.436411	0.453727	0.556109	0.560692	0.571705	0.48553	0.550327	0.682751	0.540435	0.53528	0.502369	0.509515	0.850802	0.815826	0.783536	0.597419	0.59958			516	0.461636	0.513374	0.467065	0.512013	0.510196	0.448974	0.531542	0.458445	0.645094	0.697989	0.616543	0.58683	0.849867	0.684998	0.771598	0.559071	0.504474	0.645502	0.616434	0.719933	0.803377
516.2	0.326215	0.322004	0.323237	0.329601	0.32765	0.435535	0.400305	0.423935	0.442771	0.460278	0.562899	0.568313	0.579054	0.49275	0.558225	0.691405	0.547307	0.542351	0.509746	0.516787	0.860332	0.82567	0.793072	0.605965	0.607765			516.2	0.466932	0.519054	0.472553	0.517321	0.515594	0.45416	0.537302	0.464485	0.651321	0.704378	0.622935	0.592968	0.858763	0.691635	0.778589	0.56513	0.50996	0.652399	0.622529	0.726265	0.811332
516.4	0.330493	0.326246	0.327483	0.333807	0.331822	0.440457	0.404869	0.428831	0.448019	0.465583	0.568521	0.574104	0.585468	0.498416	0.564695	0.698006	0.552995	0.54796	0.515628	0.522789	0.868198	0.833863	0.800531	0.612467	0.614744			516.4	0.471127	0.523642	0.47683	0.521686	0.519888	0.458316	0.542106	0.468998	0.656395	0.709411	0.628034	0.597835	0.865779	0.697073	0.78427	0.569872	0.514332	0.658201	0.627302	0.731267	0.817768
516.6	0.335764	0.331272	0.33273	0.339235	0.337019	0.446485	0.410632	0.434999	0.454568	0.472199	0.575348	0.581376	0.593228	0.505355	0.572729	0.706314	0.559954	0.55476	0.522824	0.530295	0.878037	0.843313	0.809951	0.620491	0.623329			516.6	0.476439	0.529216	0.48212	0.527151	0.525291	0.463472	0.547993	0.474391	0.662894	0.715589	0.63436	0.604	0.874051	0.703548	0.791219	0.575769	0.519705	0.665004	0.633085	0.737678	0.825623
516.8	0.340162	0.335532	0.336942	0.34336	0.341182	0.451328	0.415604	0.439964	0.45966	0.47743	0.581406	0.58715	0.599322	0.510733	0.578988	0.712951	0.565213	0.559909	0.528675	0.536422	0.885723	0.850865	0.817864	0.627134	0.629995			516.8	0.480537	0.533534	0.486896	0.531495	0.529547	0.467744	0.552472	0.478738	0.667829	0.720462	0.639325	0.608712	0.881051	0.708578	0.796741	0.580521	0.524224	0.670428	0.637687	0.742725	0.83192
517	0.34577	0.340995	0.34238	0.348593	0.346348	0.457515	0.421746	0.446398	0.465782	0.483917	0.588772	0.594435	0.607352	0.517807	0.587001	0.720916	0.572	0.566717	0.535952	0.543902	0.895267	0.860913	0.827695	0.635464	0.638475			517	0.48571	0.53907	0.492326	0.536887	0.534772	0.473167	0.558462	0.484495	0.673931	0.726536	0.645629	0.614691	0.889511	0.715017	0.8034	0.586455	0.529787	0.677139	0.643457	0.748815	0.839631
517.2	0.352029	0.347445	0.348722	0.354709	0.352737	0.465027	0.4291	0.453706	0.473512	0.492139	0.597724	0.603454	0.616569	0.526364	0.596664	0.730771	0.580019	0.575088	0.544849	0.552785	0.907187	0.872725	0.839566	0.644908	0.648675			517.2	0.491761	0.545502	0.499165	0.543179	0.541029	0.479539	0.565349	0.49091	0.681294	0.733807	0.653221	0.6218	0.899765	0.72278	0.811036	0.593515	0.535827	0.684625	0.650336	0.756074	0.848967
517.4	0.355129	0.350999	0.351992	0.357868	0.355822	0.46877	0.432861	0.45716	0.477345	0.496212	0.6021	0.607826	0.621203	0.530716	0.601789	0.735807	0.58424	0.579168	0.549466	0.557312	0.912953	0.878637	0.845393	0.650037	0.653913			517.4	0.494928	0.548669	0.502365	0.546384	0.544104	0.482684	0.56878	0.494357	0.684663	0.737297	0.65701	0.625268	0.904884	0.726401	0.814887	0.596999	0.538985	0.688743	0.653819	0.759696	0.853701
517.6	0.361724	0.35745	0.358743	0.36404	0.361888	0.47602	0.43992	0.464361	0.48492	0.504546	0.611256	0.616911	0.630305	0.539166	0.611692	0.746159	0.59229	0.587267	0.558259	0.566293	0.924269	0.890169	0.856881	0.660072	0.663634			517.6	0.501233	0.555068	0.509073	0.552768	0.5501	0.489026	0.57598	0.500995	0.691668	0.744417	0.66463	0.632267	0.914494	0.733844	0.822821	0.603764	0.545153	0.696943	0.66081	0.767172	0.862911
517.8	0.365178	0.360731	0.361861	0.367048	0.365163	0.479498	0.443588	0.468164	0.488702	0.508534	0.615625	0.621234	0.63486	0.543552	0.616675	0.750609	0.596856	0.59124	0.562443	0.570767	0.929993	0.89585	0.862667	0.66477	0.668923			517.8	0.504267	0.558315	0.512544	0.555928	0.553141	0.492139	0.579554	0.504483	0.695269	0.747989	0.668367	0.635721	0.919757	0.737688	0.826735	0.607299	0.548539	0.701265	0.664519	0.770768	0.867657
518	0.371604	0.367308	0.368482	0.373334	0.371537	0.48689	0.45056	0.475891	0.496443	0.516706	0.624207	0.630384	0.644032	0.551858	0.626595	0.761124	0.605665	0.599357	0.571372	0.579655	0.941382	0.90759	0.873806	0.674475	0.67868			518	0.510308	0.564586	0.519179	0.562205	0.559282	0.498704	0.586433	0.511421	0.702259	0.754704	0.676025	0.642968	0.929994	0.745014	0.834669	0.614584	0.554953	0.70963	0.671524	0.777778	0.877145
518.2	0.375021	0.370487	0.371922	0.376611	0.37467	0.490671	0.454051	0.479643	0.500368	0.520627	0.628659	0.634954	0.648639	0.556364	0.631452	0.766135	0.609714	0.60328	0.575799	0.583935	0.947107	0.913661	0.879051	0.679326	0.684021			518.2	0.513417	0.567632	0.522505	0.565164	0.562319	0.502027	0.589582	0.514786	0.705762	0.758143	0.679825	0.64671	0.935308	0.748631	0.838604	0.61823	0.557904	0.713632	0.675086	0.781264	0.881668
518.4	0.381402	0.377281	0.379019	0.382895	0.381195	0.498179	0.461433	0.487178	0.508206	0.528578	0.637518	0.643778	0.657896	0.56497	0.640978	0.776598	0.618347	0.611194	0.584473	0.592921	0.958526	0.925459	0.890806	0.689061	0.694075			518.4	0.51959	0.57369	0.529135	0.570998	0.568615	0.508231	0.596243	0.52132	0.712539	0.764982	0.687257	0.653375	0.946059	0.756162	0.846021	0.625304	0.564244	0.72144	0.682039	0.788331	0.890795
518.6	0.384583	0.380724	0.382476	0.386094	0.384541	0.50161	0.464961	0.491109	0.512154	0.53273	0.641923	0.648373	0.662237	0.569182	0.645771	0.781501	0.622473	0.615572	0.588715	0.597676	0.964712	0.931516	0.896627	0.694135	0.69907			518.6	0.522626	0.57672	0.53261	0.573984	0.571578	0.511488	0.59958	0.524558	0.716255	0.768106	0.690938	0.656797	0.95133	0.759824	0.849651	0.628693	0.567567	0.725256	0.685652	0.791889	0.89531
518.8	0.391081	0.387233	0.389574	0.392795	0.391154	0.509506	0.472081	0.498674	0.520172	0.540708	0.650925	0.656887	0.67125	0.577529	0.655678	0.7916	0.630634	0.623518	0.597462	0.606596	0.976924	0.942991	0.907762	0.70435	0.709232			518.8	0.528707	0.582766	0.539213	0.579912	0.577636	0.517653	0.606659	0.531449	0.722936	0.774547	0.698434	0.663695	0.960909	0.767191	0.856854	0.6354	0.573896	0.733097	0.692541	0.798789	0.904694
519	0.394618	0.390483	0.392859	0.396013	0.394396	0.513257	0.4759	0.502497	0.524052	0.544766	0.655181	0.661035	0.676036	0.581793	0.660614	0.796528	0.634666	0.627791	0.601616	0.611226	0.982721	0.948426	0.913511	0.709489	0.714239			519	0.531811	0.586055	0.542627	0.58289	0.580589	0.520641	0.61007	0.534904	0.72612	0.77782	0.702002	0.667237	0.966193	0.770585	0.860418	0.63866	0.576914	0.737067	0.696091	0.802266	0.909317
519.2	0.40156	0.396996	0.399546	0.402109	0.400856	0.520434	0.483243	0.510138	0.532003	0.552748	0.663676	0.669664	0.685422	0.590739	0.670076	0.806253	0.64311	0.63603	0.610248	0.620039	0.994042	0.960426	0.924276	0.719278	0.724568			519.2	0.537983	0.59199	0.549315	0.589157	0.586614	0.526844	0.616921	0.541822	0.732798	0.784401	0.709388	0.674186	0.976429	0.77765	0.867531	0.645643	0.583357	0.745217	0.702887	0.809038	0.918516
519.4	0.404895	0.40021	0.402861	0.405222	0.404101	0.524271	0.486983	0.514083	0.536263	0.55684	0.668017	0.67419	0.689515	0.595044	0.674903	0.81159	0.647391	0.640291	0.614574	0.624672	0.999665	0.966131	0.930102	0.724167	0.729356			519.4	0.541066	0.59493	0.552706	0.592241	0.589647	0.530008	0.620349	0.545045	0.736229	0.787544	0.713166	0.677548	0.981626	0.781249	0.871149	0.64902	0.586747	0.748999	0.706273	0.812347	0.923078
519.6	0.411541	0.406843	0.409127	0.411754	0.410525	0.532129	0.49462	0.522313	0.544076	0.565283	0.676892	0.682728	0.6992	0.603189	0.684514	0.821187	0.65623	0.64799	0.623354	0.633912	1.01113	0.978135	0.941195	0.733995	0.739491			519.6	0.547198	0.601296	0.559168	0.598082	0.595641	0.536339	0.626813	0.551836	0.742915	0.793966	0.720663	0.684506	0.991461	0.788567	0.878516	0.655875	0.593104	0.756705	0.713076	0.818932	0.932136
519.8	0.415158	0.410288	0.412348	0.415111	0.41394	0.536041	0.498289	0.526216	0.547995	0.569316	0.680977	0.687262	0.703624	0.60734	0.689238	0.826365	0.660109	0.652148	0.62778	0.638527	1.01691	0.983792	0.947069	0.739214	0.74439			519.8	0.550357	0.604221	0.562583	0.601038	0.598584	0.539497	0.630184	0.555349	0.746044	0.797158	0.724354	0.688159	0.996367	0.791811	0.881996	0.659361	0.596104	0.760508	0.716515	0.822234	0.936622
520	0.421809	0.417249	0.418999	0.421521	0.420293	0.543841	0.505914	0.533484	0.555588	0.577577	0.690049	0.696509	0.712366	0.61587	0.699084	0.836289	0.66937	0.66056	0.63685	0.647392	1.02906	0.995665	0.959042	0.749442	0.754613			520	0.556511	0.610248	0.56903	0.606873	0.604358	0.545864	0.636602	0.562166	0.752145	0.803254	0.731806	0.69474	1.00655	0.798971	0.889218	0.666352	0.602467	0.768523	0.723296	0.828691	0.94585
520.2	0.427329	0.422716	0.424527	0.42731	0.425801	0.550238	0.511507	0.540089	0.562117	0.584621	0.697062	0.703867	0.720326	0.623105	0.707258	0.844962	0.676639	0.667488	0.644432	0.655051	1.0386	1.00553	0.968231	0.757713	0.763136			520.2	0.561762	0.615325	0.57423	0.611711	0.609199	0.551146	0.642181	0.567947	0.757494	0.808358	0.738045	0.700905	1.01506	0.804987	0.895079	0.672293	0.607451	0.775303	0.728904	0.833863	0.953453
520.4	0.43198	0.427094	0.429009	0.431884	0.430316	0.555321	0.516059	0.54528	0.567628	0.590291	0.70296	0.709927	0.72629	0.628693	0.713722	0.852103	0.682355	0.673308	0.650452	0.661161	1.04635	1.01259	0.975769	0.764263	0.769967			520.4	0.565951	0.619357	0.578472	0.615553	0.613142	0.555357	0.646596	0.57248	0.761695	0.812484	0.743105	0.705636	1.02161	0.809865	0.899721	0.676936	0.611425	0.780484	0.733562	0.838283	0.959596
520.6	0.438019	0.432559	0.434802	0.437413	0.435876	0.562029	0.521928	0.551932	0.574374	0.597204	0.710075	0.717472	0.733765	0.635877	0.721975	0.860942	0.68964	0.680217	0.657803	0.668607	1.05601	1.02266	0.984864	0.772581	0.778504			520.6	0.571231	0.624522	0.583929	0.620525	0.61791	0.560672	0.652042	0.578318	0.766821	0.817457	0.749329	0.711566	1.03013	0.815799	0.905617	0.682677	0.616829	0.787243	0.739355	0.84372	0.967407
520.8	0.442743	0.436939	0.439291	0.441908	0.440248	0.567407	0.526685	0.5572	0.579651	0.602819	0.716054	0.723801	0.739918	0.641631	0.728467	0.867938	0.695473	0.685918	0.663661	0.674584	1.06339	1.03038	0.992124	0.779149	0.785087			520.8	0.575374	0.628579	0.588492	0.6243	0.621758	0.564845	0.656457	0.583004	0.77112	0.821378	0.75421	0.716209	1.03683	0.820681	0.910326	0.687269	0.621041	0.792607	0.743873	0.847816	0.973514
521	0.448372	0.442832	0.444949	0.447566	0.446131	0.573755	0.532802	0.563629	0.586395	0.609653	0.723134	0.731491	0.747452	0.648979	0.73656	0.876836	0.702565	0.692929	0.671507	0.682213	1.0729	1.04037	1.0016	0.787649	0.793759			521	0.580487	0.633573	0.593645	0.629116	0.626657	0.570182	0.661643	0.58859	0.776413	0.826252	0.760605	0.722374	1.0454	0.826707	0.916043	0.693123	0.626547	0.799238	0.749454	0.853027	0.981317
521.2	0.452916	0.447587	0.449473	0.452039	0.450713	0.579158	0.537735	0.568557	0.591949	0.615309	0.729056	0.737525	0.753711	0.655098	0.743055	0.883744	0.708341	0.698758	0.677679	0.688131	1.08084	1.04815	1.00923	0.794368	0.800532			521.2	0.584594	0.637443	0.598034	0.63304	0.630518	0.574513	0.665763	0.593196	0.780544	0.830187	0.765672	0.727183	1.05222	0.831534	0.920565	0.69781	0.630812	0.804434	0.754004	0.857069	0.987449
521.4	0.457719	0.452325	0.45414	0.456593	0.455164	0.584466	0.542681	0.573668	0.597581	0.620868	0.734789	0.743413	0.759892	0.660907	0.749689	0.890293	0.71376	0.704577	0.683598	0.694221	1.08866	1.05607	1.01697	0.801256	0.807543			521.4	0.588735	0.641515	0.602586	0.636846	0.634357	0.578635	0.669887	0.597705	0.784835	0.834301	0.770638	0.731976	1.05872	0.836094	0.925163	0.702363	0.634865	0.809753	0.758392	0.861259	0.993512
521.6	0.463567	0.458083	0.459688	0.462297	0.460693	0.590855	0.548873	0.580164	0.604785	0.627837	0.741892	0.750901	0.767557	0.668384	0.758121	0.898569	0.720799	0.711472	0.691133	0.701861	1.09816	1.06591	1.02724	0.809817	0.816098			521.6	0.594023	0.646669	0.608154	0.641742	0.639207	0.583869	0.675145	0.603513	0.790491	0.83936	0.776868	0.737836	1.06675	0.841797	0.930784	0.708173	0.640215	0.816325	0.763781	0.866449	1.0015
521.8	0.468455	0.462968	0.464261	0.466692	0.465288	0.596239	0.553661	0.585362	0.610233	0.633617	0.747771	0.757256	0.773737	0.673983	0.76505	0.905075	0.726325	0.717366	0.697146	0.708164	1.10578	1.0737	1.03497	0.816809	0.823191			521.8	0.598189	0.650699	0.612496	0.645898	0.643088	0.588164	0.679341	0.608216	0.794928	0.843396	0.781948	0.742722	1.07334	0.846543	0.935475	0.712929	0.644307	0.821717	0.768184	0.870514	1.00779
522	0.474574	0.468669	0.469911	0.472261	0.47075	0.602863	0.559717	0.591768	0.617182	0.640693	0.755463	0.764769	0.781355	0.681214	0.773586	0.913576	0.733621	0.72477	0.704866	0.715736	1.11532	1.08372	1.04461	0.825581	0.83191			522	0.603383	0.655607	0.617944	0.651122	0.647897	0.593542	0.684591	0.61403	0.800352	0.848594	0.788169	0.748915	1.08156	0.852531	0.941135	0.718849	0.649516	0.828429	0.773555	0.87551	1.01561
522.2	0.479168	0.473247	0.474379	0.476856	0.475353	0.607954	0.564636	0.596831	0.62268	0.646464	0.761538	0.77107	0.787879	0.68727	0.780218	0.920361	0.739625	0.730685	0.710944	0.721904	1.12303	1.09193	1.05266	0.832393	0.838734			522.2	0.607576	0.659607	0.622533	0.655236	0.651663	0.597786	0.688551	0.618931	0.804743	0.852913	0.793247	0.753824	1.08826	0.857173	0.945812	0.723605	0.653549	0.834164	0.778062	0.879758	1.02177
522.4	0.485305	0.479163	0.479983	0.48264	0.481095	0.614574	0.570655	0.603403	0.629515	0.653501	0.768968	0.779348	0.796237	0.694716	0.788651	0.92913	0.747246	0.737937	0.718645	0.729642	1.13248	1.10194	1.06281	0.840662	0.84749			522.4	0.612696	0.664559	0.627906	0.660222	0.656466	0.603168	0.69371	0.625159	0.810299	0.858065	0.799787	0.759722	1.09644	0.863033	0.951687	0.729654	0.658824	0.840928	0.783695	0.885096	1.02962
522.6	0.49008	0.484125	0.484742	0.487565	0.485762	0.620312	0.57593	0.60868	0.635231	0.65927	0.775261	0.785769	0.802702	0.70049	0.795355	0.936496	0.753428	0.743843	0.72494	0.735815	1.1404	1.10982	1.0714	0.847854	0.854534			522.6	0.616924	0.66879	0.632039	0.664271	0.660406	0.607562	0.69788	0.629554	0.814735	0.862074	0.804941	0.764687	1.10316	0.867765	0.956491	0.734416	0.662755	0.846184	0.788112	0.889206	1.03619
522.8	0.496257	0.490012	0.490827	0.493633	0.49168	0.627287	0.582481	0.615345	0.642357	0.666525	0.783492	0.793443	0.811103	0.707706	0.80389	0.945478	0.761017	0.751082	0.732566	0.743609	1.15067	1.11964	1.08146	0.856539	0.863669			522.8	0.622398	0.674049	0.637166	0.669245	0.665304	0.613103	0.702919	0.635514	0.820309	0.86717	0.811275	0.77098	1.1112	0.873703	0.962423	0.740677	0.6676	0.852785	0.793787	0.894587	1.04426
523	0.503871	0.497301	0.498091	0.500722	0.499184	0.63552	0.590023	0.623658	0.650769	0.674952	0.792932	0.802544	0.820517	0.716786	0.814328	0.956632	0.76974	0.759875	0.741963	0.752848	1.16357	1.13125	1.09322	0.86725	0.874471			523	0.628803	0.679937	0.643623	0.675423	0.671101	0.619684	0.709508	0.642765	0.826956	0.873301	0.818765	0.778456	1.12141	0.88079	0.969409	0.74775	0.673818	0.861283	0.800657	0.900855	1.05372
523.2	0.507277	0.500864	0.501878	0.504202	0.502791	0.639506	0.594102	0.627976	0.654788	0.679319	0.797977	0.807029	0.825353	0.7212	0.819832	0.962355	0.774545	0.764424	0.746476	0.757497	1.16975	1.13762	1.09919	0.872499	0.879859			523.2	0.631836	0.683066	0.646788	0.678493	0.674067	0.622903	0.712684	0.646429	0.830356	0.876495	0.82253	0.782047	1.12625	0.884471	0.972878	0.751313	0.676885	0.865692	0.804211	0.904044	1.05854
523.4	0.514721	0.508178	0.509151	0.511195	0.510202	0.648067	0.601623	0.636456	0.663772	0.687916	0.807274	0.81614	0.835402	0.73049	0.830466	0.972813	0.783243	0.772979	0.756272	0.767081	1.18137	1.15028	1.11136	0.883117	0.890437			523.4	0.63832	0.689169	0.653555	0.684999	0.679973	0.629473	0.718927	0.653779	0.837272	0.882734	0.830479	0.789616	1.13647	0.891815	0.979857	0.758582	0.682943	0.873695	0.811096	0.910734	1.06807
523.6	0.518757	0.511631	0.512848	0.51459	0.51378	0.652419	0.605831	0.640152	0.668252	0.692275	0.812247	0.82139	0.840039	0.735062	0.835768	0.977824	0.787609	0.777713	0.760611	0.771708	1.18709	1.15632	1.1175	0.888374	0.895777			523.6	0.641564	0.692343	0.656963	0.688104	0.682904	0.632647	0.721852	0.657219	0.840643	0.885907	0.834384	0.79318	1.14098	0.895491	0.983464	0.762133	0.686098	0.877899	0.814661	0.914297	1.07315
523.8	0.525915	0.519012	0.520321	0.521552	0.521235	0.660692	0.614028	0.647909	0.67672	0.700984	0.82131	0.831031	0.849804	0.744493	0.846651	0.988327	0.796728	0.786372	0.770102	0.78114	1.19936	1.16927	1.12941	0.899228	0.906622			523.8	0.647861	0.698596	0.664105	0.694196	0.688743	0.639249	0.728258	0.664569	0.847779	0.892231	0.841804	0.800856	1.15127	0.902639	0.990737	0.76951	0.6921	0.88632	0.821516	0.920843	1.08301
524	0.529621	0.522877	0.523694	0.525254	0.524905	0.664464	0.61814	0.651999	0.681212	0.705129	0.826178	0.835873	0.854995	0.749247	0.851917	0.993504	0.801173	0.790855	0.77497	0.785926	1.20531	1.17512	1.13526	0.904639	0.91193			524	0.651035	0.701549	0.667512	0.697382	0.69182	0.64261	0.731465	0.668368	0.851328	0.89538	0.845634	0.80448	1.15618	0.906466	0.99432	0.773223	0.694931	0.890426	0.824853	0.924052	1.08777
524.2	0.536938	0.530456	0.531265	0.532403	0.532193	0.672305	0.625739	0.660244	0.689831	0.714214	0.835144	0.845356	0.865359	0.758359	0.86224	1.00411	0.80994	0.799963	0.78409	0.795798	1.21836	1.18734	1.14775	0.915637	0.92321			524.2	0.657354	0.707715	0.67408	0.703508	0.697842	0.649538	0.737759	0.675459	0.857969	0.901782	0.853633	0.812063	1.16636	0.913833	1.00142	0.780829	0.700724	0.898815	0.831921	0.930904	1.09719
524.4	0.540775	0.534289	0.535165	0.536185	0.535833	0.677079	0.629532	0.664127	0.694225	0.718697	0.839709	0.850201	0.870471	0.763233	0.867571	1.0096	0.814362	0.804583	0.788865	0.800537	1.22495	1.19316	1.15391	0.921171	0.928834			524.4	0.660605	0.710699	0.677474	0.706628	0.701057	0.652974	0.741108	0.679126	0.861342	0.905235	0.857588	0.815829	1.1715	0.91752	1.0051	0.784692	0.703373	0.903163	0.835451	0.934318	1.10218
524.6	0.54804	0.541772	0.542639	0.543704	0.543041	0.685028	0.637448	0.673224	0.702663	0.727575	0.849221	0.859735	0.880517	0.772035	0.87826	1.02072	0.823394	0.813049	0.79833	0.810579	1.23723	1.20552	1.16575	0.93179	0.940303			524.6	0.667466	0.717286	0.683737	0.713056	0.707301	0.659718	0.748232	0.686373	0.868521	0.911848	0.865593	0.823061	1.18121	0.924832	1.0125	0.792126	0.709261	0.911893	0.842413	0.941069	1.11225
524.8	0.551751	0.545568	0.546483	0.54747	0.546639	0.689077	0.641257	0.677217	0.706762	0.732015	0.854078	0.864732	0.885489	0.776841	0.883693	1.02607	0.828051	0.817538	0.802913	0.81567	1.24394	1.21199	1.17167	0.937394	0.945851			524.8	0.670771	0.72044	0.68702	0.716124	0.710261	0.663089	0.751555	0.689924	0.872145	0.914922	0.869349	0.826769	1.18622	0.928741	1.01627	0.795759	0.712251	0.915903	0.846133	0.94448	1.11745
525	0.55938	0.552921	0.55415	0.554995	0.55396	0.697701	0.649412	0.685659	0.714878	0.740906	0.864067	0.874671	0.895924	0.786099	0.894353	1.03666	0.837685	0.826647	0.812419	0.825787	1.25673	1.22475	1.18463	0.947898	0.956788			525	0.677472	0.726851	0.693627	0.72253	0.716372	0.6698	0.758602	0.696926	0.878784	0.921553	0.877329	0.834435	1.19664	0.936262	1.02415	0.802998	0.718177	0.924771	0.853606	0.951088	1.12714
525.2	0.563341	0.556497	0.557969	0.558802	0.557752	0.702113	0.653427	0.690079	0.719227	0.745276	0.869183	0.879274	0.900809	0.791016	0.899863	1.04212	0.842227	0.831048	0.817444	0.83086	1.26345	1.23129	1.19114	0.953016	0.962376			525.2	0.680833	0.729815	0.696908	0.725485	0.719239	0.673233	0.7619	0.700502	0.882366	0.924559	0.881341	0.83842	1.20154	0.940032	1.02784	0.806507	0.721268	0.929068	0.857272	0.954407	1.13211
525.4	0.570355	0.5641	0.565811	0.566678	0.565434	0.710529	0.661749	0.699175	0.728027	0.754424	0.878591	0.889513	0.910986	0.800529	0.910479	1.05327	0.85189	0.839649	0.827339	0.84097	1.27651	1.24405	1.20392	0.964298	0.973374			525.4	0.687494	0.736322	0.703544	0.731519	0.725392	0.680174	0.768722	0.707392	0.889302	0.930886	0.889285	0.84591	1.21167	0.947623	1.03519	0.814084	0.727199	0.937709	0.864512	0.961382	1.14215
525.6	0.576952	0.570725	0.572398	0.572838	0.571696	0.717627	0.668878	0.70679	0.735434	0.761971	0.886448	0.89774	0.919253	0.808258	0.919485	1.06237	0.859901	0.847016	0.83549	0.849306	1.28723	1.25482	1.21449	0.97378	0.982879			525.6	0.693245	0.741768	0.70935	0.736787	0.730845	0.685978	0.77463	0.713043	0.895057	0.93623	0.896173	0.852484	1.22033	0.954442	1.04132	0.820545	0.732321	0.944768	0.870472	0.966989	1.15029
525.8	0.581981	0.576103	0.577809	0.577849	0.576912	0.723284	0.674459	0.712791	0.741286	0.76805	0.893073	0.9042	0.925764	0.814539	0.926781	1.06973	0.866144	0.85299	0.841993	0.856026	1.29613	1.26367	1.22297	0.981113	0.990293			525.8	0.69785	0.74608	0.713941	0.74104	0.735075	0.690609	0.779319	0.717651	0.899728	0.9406	0.901505	0.857806	1.2271	0.959921	1.04628	0.825634	0.736372	0.950467	0.875219	0.971445	1.15703
526	0.588228	0.582598	0.58403	0.584079	0.58334	0.729843	0.681012	0.720058	0.748238	0.77557	0.900743	0.912979	0.934096	0.822694	0.935945	1.07813	0.873762	0.861121	0.850224	0.864221	1.30669	1.27437	1.23332	0.990485	0.999392			526	0.703635	0.751417	0.719763	0.746265	0.740258	0.696227	0.785195	0.723905	0.905726	0.945988	0.908226	0.863993	1.2356	0.966419	1.05239	0.832093	0.741538	0.957764	0.88139	0.977395	1.16535
526.2	0.593447	0.587941	0.589136	0.589152	0.588456	0.73522	0.686411	0.725867	0.753613	0.781634	0.907	0.919675	0.940855	0.829223	0.943128	1.08506	0.879742	0.867379	0.856849	0.87084	1.3147	1.28284	1.24149	0.998194	1.00674			526.2	0.708248	0.755437	0.724357	0.750662	0.744288	0.700906	0.790001	0.728942	0.910523	0.950116	0.913603	0.868945	1.24226	0.971694	1.0574	0.837037	0.74543	0.963305	0.88629	0.981989	1.1719
526.4	0.598234	0.593401	0.594571	0.594329	0.593378	0.74089	0.691707	0.731386	0.759536	0.787922	0.9134	0.926587	0.947578	0.835417	0.950444	1.09179	0.885768	0.873777	0.863097	0.877631	1.32287	1.29153	1.24977	1.00535	1.01403			526.4	0.712801	0.759744	0.729063	0.754757	0.748572	0.705554	0.794555	0.73348	0.915116	0.954387	0.919038	0.873996	1.2491	0.976903	1.06249	0.842182	0.749364	0.968831	0.891177	0.986575	1.1786
526.6	0.604681	0.600133	0.601033	0.600765	0.599584	0.748272	0.698143	0.738279	0.76694	0.795628	0.92152	0.935077	0.956122	0.843348	0.959366	1.10015	0.893442	0.881401	0.871253	0.886127	1.33295	1.30194	1.26026	1.01451	1.02326			526.6	0.718626	0.765139	0.734973	0.759849	0.753827	0.711481	0.800306	0.739273	0.921022	0.959563	0.925769	0.880043	1.25756	0.98351	1.06877	0.848513	0.754536	0.975866	0.897132	0.992384	1.18703
526.8	0.610014	0.60542	0.6064	0.606173	0.604726	0.753493	0.703768	0.743855	0.772603	0.80178	0.92806	0.941738	0.96288	0.84956	0.96678	1.10763	0.899667	0.887483	0.877465	0.892772	1.34136	1.3101	1.2683	1.02219	1.03101			526.8	0.723178	0.769453	0.739537	0.763899	0.758149	0.716089	0.804849	0.743811	0.925719	0.964054	0.931009	0.885142	1.26427	0.988816	1.07375	0.853511	0.758712	0.981769	0.901988	0.996866	1.19385
527	0.616416	0.612151	0.613077	0.61286	0.611119	0.759996	0.710515	0.751492	0.779719	0.809543	0.936114	0.94981	0.971432	0.857432	0.975906	1.11695	0.907707	0.894916	0.885789	0.901173	1.35223	1.32018	1.27884	1.03186	1.0404			527	0.728909	0.774656	0.745042	0.769128	0.763426	0.721942	0.810799	0.74971	0.931484	0.969454	0.937535	0.891428	1.27285	0.995293	1.07981	0.859783	0.76393	0.989054	0.908221	1.00229	1.20207
527.2	0.621789	0.617602	0.618413	0.61786	0.616092	0.765787	0.715948	0.757704	0.785356	0.815831	0.942781	0.956382	0.978351	0.864094	0.98314	1.12414	0.914234	0.901116	0.892455	0.907856	1.36097	1.32849	1.2873	1.03953	1.0478			527.2	0.733557	0.778613	0.749077	0.773474	0.767726	0.726528	0.815409	0.754201	0.936066	0.973625	0.942975	0.896449	1.27936	1.00057	1.08484	0.864799	0.768139	0.994693	0.913325	1.00683	1.2086
527.4	0.628419	0.624144	0.625286	0.62422	0.622388	0.773238	0.722742	0.765431	0.792359	0.823734	0.950963	0.964606	0.98673	0.871946	0.992235	1.13319	0.922585	0.90932	0.900701	0.916643	1.37158	1.33905	1.29802	1.04931	1.05743			527.4	0.7393	0.783647	0.754391	0.778703	0.772969	0.732191	0.82126	0.759945	0.941923	0.978889	0.949612	0.902804	1.28744	1.00673	1.09111	0.870982	0.773419	1.00175	0.919601	1.01236	1.21689
527.6	0.633623	0.629143	0.630551	0.629267	0.627401	0.778953	0.728348	0.771168	0.798016	0.829756	0.957589	0.971132	0.993021	0.878014	0.999623	1.14039	0.929012	0.915563	0.90746	0.923164	1.37957	1.3476	1.30636	1.05675	1.06449			527.6	0.744048	0.787769	0.758796	0.782873	0.777203	0.736787	0.825902	0.764613	0.94666	0.983158	0.954698	0.907713	1.29364	1.01194	1.09607	0.876147	0.777821	1.00751	0.924349	1.01672	1.22367
527.8	0.640099	0.635477	0.636764	0.63553	0.633683	0.785721	0.735395	0.778776	0.805085	0.837347	0.965623	0.979049	1.00144	0.885899	1.00891	1.14904	0.937181	0.923392	0.915579	0.931457	1.38943	1.35843	1.3169	1.06584	1.07341			527.8	0.749783	0.792909	0.764306	0.788076	0.782394	0.742498	0.831821	0.770545	0.952522	0.988194	0.960962	0.913723	1.30166	1.01815	1.10229	0.882485	0.783279	1.01453	0.930521	1.02224	1.23184
528	0.647995	0.643258	0.644714	0.643081	0.641294	0.794478	0.743532	0.786912	0.813994	0.846243	0.974838	0.989306	1.01154	0.895995	1.01957	1.15932	0.946759	0.932827	0.925353	0.941105	1.40164	1.37046	1.33011	1.07688	1.08418			528	0.756289	0.798943	0.771186	0.79413	0.788401	0.749533	0.838844	0.777547	0.959607	0.994322	0.968568	0.92106	1.31159	1.02578	1.10956	0.890026	0.789592	1.0228	0.937447	1.02899	1.24157
528.2	0.651792	0.647253	0.648731	0.64691	0.645134	0.798699	0.747932	0.791513	0.818623	0.850716	0.979221	0.994064	1.01675	0.900801	1.02486	1.16479	0.951575	0.937593	0.930447	0.945759	1.4079	1.37645	1.33649	1.08245	1.08963			528.2	0.759645	0.801868	0.774464	0.797336	0.791615	0.753021	0.842367	0.781356	0.962757	0.997576	0.972686	0.924466	1.31653	1.02962	1.11309	0.893749	0.792763	1.02693	0.940841	1.03233	1.24641
528.4	0.659391	0.654795	0.656727	0.654289	0.653162	0.806822	0.756429	0.800717	0.827386	0.860139	0.988863	1.00372	1.02653	0.910319	1.03576	1.17545	0.960308	0.946316	0.940358	0.955006	1.42	1.3889	1.34855	1.09396	1.10052			528.4	0.766283	0.807637	0.780943	0.803618	0.798083	0.759948	0.849518	0.788481	0.969477	1.00362	0.980513	0.931376	1.3259	1.03734	1.11975	0.901196	0.798864	1.03528	0.947589	1.0389	1.25613
528.6	0.663104	0.658796	0.660668	0.658221	0.656823	0.810788	0.760649	0.80494	0.831627	0.864716	0.993431	1.00877	1.03164	0.914575	1.04081	1.18083	0.964995	0.950528	0.945196	0.959796	1.42611	1.39478	1.35454	1.09974	1.10589			528.6	0.76958	0.810811	0.784195	0.806875	0.801221	0.763414	0.853156	0.791851	0.972982	1.00685	0.984376	0.934652	1.33101	1.04119	1.12334	0.904895	0.802096	1.03942	0.951066	1.04215	1.26085
528.8	0.671354	0.666456	0.668925	0.665274	0.664276	0.819163	0.768711	0.813328	0.839812	0.873866	1.00227	1.01824	1.04209	0.923748	1.05133	1.19146	0.974113	0.959973	0.954579	0.96919	1.43764	1.40682	1.36679	1.11038	1.11692			528.8	0.776222	0.816847	0.790452	0.813034	0.807486	0.770098	0.860456	0.799071	0.979606	1.01308	0.992221	0.941334	1.34016	1.04853	1.1304	0.912431	0.808111	1.04756	0.957768	1.04866	1.27041
529	0.675098	0.670192	0.672871	0.669205	0.6681	0.823193	0.772501	0.81754	0.843908	0.878509	1.00716	1.02323	1.04742	0.928286	1.05658	1.19684	0.978489	0.96436	0.959277	0.974061	1.44348	1.41321	1.37307	1.11537	1.12237			529	0.779597	0.819795	0.793365	0.815893	0.810444	0.773385	0.863764	0.802471	0.982958	1.01601	0.995977	0.944902	1.3446	1.05211	1.13419	0.915738	0.811172	1.05138	0.961212	1.05192	1.27518
529.2	0.682466	0.67813	0.680434	0.676587	0.675179	0.831545	0.780641	0.825976	0.852228	0.887665	1.01576	1.03307	1.05733	0.937898	1.06735	1.20734	0.987587	0.972833	0.968966	0.983694	1.45489	1.42491	1.38476	1.12601	1.13322			529.2	0.786119	0.825808	0.799361	0.821837	0.816411	0.780142	0.870449	0.809163	0.989344	1.02186	1.00341	0.951102	1.35356	1.05908	1.14136	0.922734	0.817434	1.05943	0.968147	1.05843	1.28435
529.4	0.68633	0.681569	0.684575	0.680225	0.679028	0.83574	0.784504	0.830097	0.856486	0.892029	1.02029	1.0377	1.06253	0.942161	1.07274	1.21296	0.992089	0.977174	0.97372	0.988863	1.46051	1.4309	1.39048	1.13134	1.13873			529.4	0.789421	0.828369	0.802277	0.824955	0.819252	0.783525	0.8739	0.812631	0.992553	1.02485	1.00696	0.954502	1.35805	1.06276	1.14489	0.92625	0.820337	1.06337	0.971657	1.06136	1.28895
529.6	0.693792	0.68934	0.692332	0.68756	0.686144	0.844264	0.792531	0.838315	0.86527	0.901013	1.02882	1.04731	1.07239	0.951126	1.0834	1.22328	1.00067	0.985788	0.982827	0.998785	1.47242	1.44239	1.40223	1.14146	1.1495			529.6	0.79592	0.834304	0.808212	0.830643	0.825401	0.79007	0.880673	0.819072	0.999018	1.03091	1.01438	0.961633	1.36656	1.06993	1.15166	0.933089	0.826458	1.07126	0.978269	1.06762	1.29823
529.8	0.697778	0.693175	0.695886	0.690977	0.690057	0.848032	0.796399	0.842453	0.869387	0.90532	1.03319	1.05177	1.07758	0.955776	1.0887	1.22835	1.00527	0.990157	0.987638	1.00366	1.47816	1.44841	1.40852	1.14709	1.15467			529.8	0.799176	0.837136	0.811506	0.83361	0.828389	0.793354	0.884148	0.822384	1.00241	1.0339	1.01794	0.965052	1.37078	1.07339	1.15497	0.936534	0.829381	1.07541	0.981773	1.07076	1.30282
530	0.705451	0.700498	0.703495	0.698458	0.697367	0.856435	0.804558	0.850873	0.87771	0.913454	1.04147	1.06135	1.08753	0.964826	1.0991	1.23871	1.01396	0.998676	0.997005	1.01321	1.48973	1.45994	1.41999	1.15787	1.16496			530	0.805584	0.842893	0.817485	0.839755	0.834176	0.799905	0.890535	0.828774	1.00852	1.03951	1.02519	0.971644	1.37949	1.08049	1.16167	0.943529	0.835079	1.08293	0.98809	1.07658	1.3118
530.2	0.709915	0.705342	0.708551	0.703056	0.702195	0.861772	0.809717	0.856538	0.882899	0.919192	1.04694	1.06796	1.09394	0.970677	1.10565	1.24504	1.01988	1.00468	1.00339	1.01945	1.49736	1.4676	1.4276	1.16482	1.17169			530.2	0.809709	0.846568	0.821115	0.843549	0.837999	0.804238	0.895055	0.833012	1.01288	1.04311	1.02989	0.976072	1.38531	1.08511	1.16598	0.948059	0.838857	1.08779	0.992238	1.08056	1.31755
530.4	0.715862	0.711444	0.71447	0.709054	0.708224	0.868715	0.816287	0.863028	0.889626	0.926444	1.05408	1.07584	1.10166	0.978061	1.11398	1.25332	1.02705	1.012	1.01116	1.02737	1.50719	1.47725	1.43691	1.17335	1.18029			530.4	0.814874	0.85121	0.825607	0.848242	0.842874	0.809461	0.900718	0.838237	1.01809	1.04783	1.03586	0.981272	1.39224	1.09062	1.17165	0.953733	0.84347	1.09362	0.997414	1.08552	1.32477
530.6	0.720518	0.716418	0.719297	0.713876	0.713002	0.873591	0.821397	0.868246	0.895066	0.931691	1.05958	1.08177	1.108	0.983381	1.12069	1.25999	1.03248	1.0177	1.01707	1.0336	1.51409	1.48467	1.44475	1.18008	1.18716			530.6	0.819111	0.854957	0.829626	0.851984	0.846556	0.813767	0.905009	0.842534	1.02223	1.05159	1.04064	0.985116	1.39779	1.09483	1.17593	0.958055	0.847179	1.09852	1.00151	1.08942	1.33063
530.8	0.726345	0.722502	0.725459	0.719731	0.719063	0.879978	0.827522	0.874587	0.901583	0.938304	1.06651	1.08939	1.11588	0.990508	1.12894	1.26834	1.03929	1.0243	1.02455	1.04088	1.52286	1.49368	1.45475	1.18845	1.19546			530.8	0.824461	0.859598	0.834593	0.856398	0.851296	0.819078	0.910334	0.847593	1.02707	1.05637	1.04639	0.989919	1.40487	1.10018	1.18122	0.963547	0.851926	1.10463	1.00649	1.09438	1.33781
531	0.731174	0.727488	0.730386	0.724457	0.724149	0.885177	0.832609	0.879768	0.907017	0.943777	1.07189	1.09533	1.12247	0.99661	1.13538	1.27452	1.04515	1.02941	1.03056	1.04684	1.52983	1.50085	1.46245	1.19501	1.20239			531	0.828591	0.863296	0.838468	0.86007	0.854973	0.823146	0.91469	0.851886	1.03099	1.05995	1.05108	0.99403	1.41019	1.1044	1.18538	0.967618	0.855436	1.10928	1.01067	1.09826	1.34346
531.2	0.737131	0.733397	0.736652	0.730407	0.730076	0.891788	0.839031	0.886165	0.913917	0.950634	1.07906	1.10288	1.13	1.00365	1.14346	1.28244	1.05235	1.03596	1.03795	1.05446	1.53926	1.51027	1.47168	1.20341	1.21072			531.2	0.833818	0.868011	0.8433	0.864686	0.85956	0.828108	0.919966	0.857344	1.03603	1.06432	1.05687	0.999244	1.41703	1.10989	1.19052	0.972835	0.859728	1.11473	1.01563	1.10291	1.3506
531.4	0.741786	0.738078	0.741258	0.735079	0.734708	0.896615	0.843993	0.891607	0.919013	0.956104	1.08471	1.1085	1.13622	1.0088	1.14999	1.28885	1.0577	1.04129	1.04366	1.06072	1.54649	1.5178	1.47884	1.21041	1.21735			531.4	0.837808	0.871608	0.847114	0.868328	0.863257	0.832024	0.923855	0.861205	1.03978	1.06775	1.06145	1.00322	1.42224	1.11406	1.19451	0.977021	0.863017	1.11932	1.0197	1.10642	1.35582
531.6	0.747894	0.743852	0.747107	0.740647	0.740501	0.903079	0.849744	0.897907	0.925215	0.963061	1.09167	1.11538	1.14382	1.01553	1.15812	1.29655	1.06448	1.04779	1.0507	1.06841	1.55475	1.52695	1.48786	1.21898	1.22574			531.6	0.84278	0.876066	0.851728	0.87288	0.867713	0.836914	0.928727	0.865982	1.04457	1.07204	1.06705	1.00848	1.42876	1.11895	1.19941	0.98228	0.867395	1.1248	1.02463	1.11079	1.36248
531.8	0.755119	0.751236	0.754209	0.747923	0.747192	0.910324	0.856743	0.905104	0.932816	0.970852	1.09986	1.12453	1.15232	1.02374	1.16764	1.30545	1.07285	1.05651	1.05935	1.07787	1.56515	1.53747	1.49842	1.22862	1.23581			531.8	0.848812	0.881141	0.857102	0.877826	0.872832	0.842631	0.934548	0.871565	1.05056	1.07699	1.07337	1.01433	1.43587	1.125	1.20527	0.988533	0.872465	1.13102	1.0304	1.11645	1.37025
532	0.758583	0.754786	0.757805	0.751348	0.750633	0.914117	0.860196	0.908896	0.936496	0.974786	1.10414	1.12872	1.15659	1.02819	1.17235	1.30937	1.07713	1.0609	1.06369	1.08229	1.56979	1.54259	1.50372	1.23344	1.24066			532	0.851871	0.883403	0.859973	0.880344	0.875581	0.845472	0.937346	0.874589	1.05312	1.0794	1.07661	1.01732	1.43931	1.12777	1.20816	0.991742	0.874737	1.13424	1.03301	1.11922	1.37418
532.2	0.765658	0.761749	0.763798	0.758318	0.757832	0.921503	0.867622	0.916135	0.944131	0.982394	1.11207	1.1365	1.16489	1.03648	1.18164	1.31843	1.08489	1.06803	1.07241	1.09054	1.57901	1.55325	1.51317	1.24302	1.24999			532.2	0.857621	0.887721	0.865335	0.885679	0.880702	0.851313	0.94247	0.880158	1.05868	1.08417	1.08285	1.02352	1.44644	1.13364	1.2143	0.997711	0.879648	1.14064	1.03895	1.1244	1.38172
532.4	0.768901	0.765057	0.766725	0.7616	0.761171	0.925344	0.871048	0.919927	0.947696	0.986111	1.11576	1.14027	1.16893	1.04056	1.18632	1.32267	1.08896	1.07194	1.07664	1.09476	1.58456	1.55773	1.51793	1.2481	1.25466			532.4	0.860358	0.890055	0.868191	0.888227	0.883225	0.853985	0.945225	0.882775	1.06139	1.08649	1.08577	1.0261	1.44988	1.13645	1.21688	1.00087	0.88168	1.14411	1.04169	1.12696	1.38555
532.6	0.775655	0.771094	0.773083	0.768517	0.768228	0.9321	0.878089	0.927549	0.954883	0.993617	1.12437	1.14831	1.17703	1.04811	1.19531	1.33167	1.09688	1.07955	1.08438	1.10266	1.59452	1.56736	1.52772	1.25774	1.26425			532.6	0.865956	0.89465	0.873301	0.893154	0.888245	0.859293	0.950837	0.888403	1.06693	1.09119	1.09167	1.03201	1.45692	1.1419	1.22213	1.00671	0.886181	1.15012	1.04757	1.1314	1.39298
532.8	0.778989	0.774355	0.776242	0.772016	0.771485	0.935641	0.881622	0.931226	0.957995	0.997338	1.12834	1.15194	1.18108	1.05191	1.19969	1.33623	1.10078	1.08303	1.08826	1.1066	1.59956	1.57265	1.53312	1.26242	1.26886			532.8	0.868464	0.897011	0.875724	0.895479	0.890943	0.861975	0.95335	0.890752	1.0693	1.09347	1.09452	1.03472	1.46025	1.14451	1.22479	1.00942	0.888704	1.15305	1.05023	1.13398	1.39671
533	0.78582	0.780917	0.782888	0.778546	0.778318	0.942502	0.888173	0.938297	0.964768	1.00456	1.13615	1.15966	1.18871	1.05977	1.20889	1.34485	1.10874	1.09044	1.09683	1.11435	1.609	1.58236	1.54336	1.2719	1.27773			533	0.873796	0.901465	0.88094	0.900439	0.895751	0.867271	0.958207	0.895646	1.07467	1.09789	1.10019	1.0396	1.46695	1.15002	1.23001	1.01493	0.893211	1.1593	1.05574	1.13877	1.40385
533.2	0.788959	0.784149	0.786404	0.781995	0.781372	0.946072	0.89165	0.941786	0.968351	1.0083	1.13993	1.16394	1.19274	1.06344	1.21314	1.34937	1.1123	1.09396	1.10064	1.11828	1.61328	1.58673	1.54784	1.27622	1.28245			533.2	0.876317	0.903811	0.883119	0.902962	0.898094	0.869823	0.96083	0.898538	1.07681	1.09993	1.1031	1.04208	1.4698	1.15277	1.23243	1.01749	0.895338	1.16222	1.05814	1.14098	1.40746
533.4	0.795376	0.790428	0.792665	0.788485	0.787729	0.952658	0.898049	0.948604	0.97522	1.01588	1.1479	1.17154	1.20024	1.071	1.22182	1.35783	1.11988	1.1012	1.10861	1.12637	1.62234	1.59657	1.55772	1.28512	1.29175			533.4	0.881393	0.908466	0.887922	0.907253	0.903047	0.874583	0.965828	0.902939	1.08171	1.10425	1.10857	1.04735	1.476	1.15746	1.23754	1.02294	0.899999	1.16789	1.06301	1.14541	1.4144
533.6	0.7988	0.794017	0.795525	0.791704	0.790868	0.955885	0.900897	0.952375	0.979037	1.01945	1.1516	1.17517	1.20425	1.07471	1.22582	1.36171	1.1234	1.10447	1.1121	1.13029	1.6265	1.60097	1.56218	1.28932	1.29595			533.6	0.884056	0.9108	0.890364	0.909384	0.905387	0.877021	0.968381	0.905573	1.08408	1.10621	1.11124	1.04984	1.47861	1.15987	1.24021	1.02577	0.902132	1.17075	1.06581	1.14752	1.41789
533.8	0.805062	0.80025	0.802394	0.797893	0.797249	0.962687	0.907311	0.958971	0.985914	1.02594	1.15853	1.18249	1.21218	1.08241	1.23463	1.37012	1.13014	1.11123	1.1197	1.13768	1.63533	1.61086	1.5716	1.29786	1.30457			533.8	0.88921	0.914947	0.895318	0.913465	0.909902	0.882154	0.972437	0.910393	1.08894	1.11006	1.11655	1.05465	1.48463	1.16489	1.24473	1.03103	0.906338	1.17683	1.07056	1.15189	1.42451
534	0.809214	0.803934	0.806875	0.80215	0.80137	0.967177	0.911351	0.963585	0.990513	1.03085	1.1636	1.18739	1.2171	1.08752	1.24007	1.37529	1.13477	1.1161	1.1247	1.14261	1.64114	1.61707	1.57736	1.30346	1.31026			534	0.892322	0.91784	0.89839	0.916259	0.912952	0.885218	0.975123	0.913369	1.09219	1.11264	1.11987	1.05819	1.48878	1.16826	1.24776	1.03444	0.909133	1.18026	1.07352	1.15444	1.42878
534.2	0.814359	0.809317	0.812217	0.807366	0.806548	0.972508	0.916596	0.96929	0.99622	1.03724	1.16956	1.19333	1.22298	1.09362	1.24717	1.3817	1.14042	1.12205	1.13063	1.14868	1.64844	1.62484	1.58428	1.31016	1.31741			534.2	0.896262	0.921602	0.90224	0.919973	0.916536	0.889065	0.978324	0.917099	1.09614	1.11563	1.12419	1.06242	1.49386	1.17238	1.25141	1.03864	0.912588	1.18477	1.07749	1.15748	1.43399
534.4	0.818293	0.813699	0.816268	0.811459	0.810232	0.976584	0.920602	0.973757	1.00051	1.04167	1.17394	1.19814	1.22762	1.09827	1.2526	1.38701	1.14514	1.1264	1.13544	1.15349	1.6539	1.63056	1.59007	1.31562	1.32276			534.4	0.899328	0.924413	0.905048	0.922773	0.919349	0.892079	0.981011	0.919614	1.09916	1.11803	1.12757	1.06546	1.49783	1.17532	1.25443	1.04195	0.915247	1.18791	1.08056	1.15995	1.43809
534.6	0.823488	0.819139	0.821482	0.816446	0.815278	0.981598	0.925851	0.979037	1.00564	1.04713	1.17911	1.20408	1.23406	1.10419	1.25915	1.3933	1.15057	1.13182	1.14136	1.15948	1.66028	1.63717	1.59696	1.32215	1.32977			534.6	0.903117	0.927848	0.90871	0.92634	0.922904	0.895935	0.984179	0.922707	1.10279	1.12108	1.13176	1.06878	1.50204	1.17893	1.25802	1.04606	0.918505	1.19223	1.0844	1.16318	1.44296
534.8	0.827488	0.823099	0.825463	0.820467	0.819133	0.985942	0.930039	0.983761	1.00991	1.05144	1.18328	1.20841	1.23841	1.10908	1.26442	1.39808	1.155	1.13603	1.14604	1.16415	1.66541	1.64304	1.60232	1.32712	1.33524			534.8	0.906028	0.93062	0.911262	0.929	0.9257	0.898883	0.986491	0.925454	1.10545	1.12348	1.13502	1.07161	1.50567	1.18174	1.26073	1.04914	0.921041	1.19547	1.08745	1.16588	1.44683
535	0.83239	0.828036	0.830442	0.825598	0.823903	0.990597	0.935266	0.989727	1.01526	1.05657	1.18863	1.21406	1.24395	1.11481	1.27084	1.40412	1.16052	1.14147	1.15218	1.17007	1.67214	1.64933	1.60915	1.33342	1.34189			535	0.909572	0.934085	0.914601	0.932331	0.92903	0.902586	0.989427	0.928581	1.10907	1.12628	1.13877	1.07491	1.50996	1.18525	1.26399	1.05284	0.923881	1.19942	1.09134	1.16882	1.45137
535.2	0.836185	0.831902	0.834267	0.829482	0.82787	0.994763	0.939256	0.993798	1.01925	1.0606	1.19231	1.21798	1.24851	1.1192	1.2757	1.40907	1.16441	1.14515	1.15633	1.17438	1.67648	1.6547	1.61456	1.3388	1.347			535.2	0.912249	0.936868	0.917297	0.934953	0.93173	0.905349	0.991422	0.93143	1.11162	1.12831	1.14182	1.07754	1.51394	1.18806	1.26666	1.05589	0.925997	1.20274	1.09434	1.17092	1.45503
535.4	0.841226	0.836459	0.838892	0.834201	0.832753	0.999612	0.943805	0.999172	1.02453	1.06568	1.19689	1.22319	1.25403	1.1245	1.28204	1.41519	1.16912	1.14993	1.16165	1.17957	1.68243	1.66162	1.62082	1.3455	1.35339			535.4	0.915563	0.940716	0.920381	0.938043	0.934835	0.908818	0.993922	0.934448	1.11478	1.13103	1.14556	1.08092	1.5182	1.19134	1.26992	1.05936	0.92857	1.20634	1.09801	1.17357	1.45938
535.6	0.847016	0.841904	0.844807	0.840098	0.838011	1.00532	0.949011	1.00516	1.03004	1.07132	1.20264	1.22992	1.26083	1.13111	1.28958	1.4219	1.17523	1.15645	1.16805	1.18674	1.69102	1.66886	1.62906	1.35257	1.36071			535.6	0.919903	0.945342	0.9243	0.941789	0.938522	0.91256	0.997139	0.938005	1.1186	1.13423	1.14972	1.08435	1.52281	1.19494	1.27315	1.0633	0.931556	1.211	1.10222	1.17646	1.46489
535.8	0.85016	0.84456	0.848037	0.842873	0.840723	1.00822	0.951778	1.00783	1.03299	1.07436	1.20546	1.23359	1.26424	1.13426	1.29329	1.42503	1.17801	1.15908	1.17121	1.19002	1.69423	1.67266	1.6328	1.35589	1.36409			535.8	0.921707	0.947442	0.926094	0.943522	0.940376	0.914616	0.998584	0.939773	1.12024	1.1358	1.15194	1.08606	1.52511	1.19687	1.27485	1.06522	0.933347	1.21329	1.10424	1.17795	1.46761
536	0.855389	0.850424	0.853958	0.848254	0.846139	1.01389	0.957094	1.01343	1.03871	1.08043	1.21069	1.23941	1.27098	1.14056	1.30001	1.43032	1.1837	1.16493	1.17791	1.19693	1.70028	1.68083	1.64067	1.36274	1.37091			536	0.925652	0.951394	0.929747	0.946877	0.943776	0.918552	1.00141	0.943463	1.12388	1.13876	1.15584	1.08984	1.52949	1.2008	1.27824	1.06939	0.93584	1.21783	1.10778	1.18108	1.47262
536.2	0.858087	0.853697	0.856705	0.850832	0.848823	1.01674	0.959938	1.01628	1.0417	1.08325	1.21349	1.24259	1.27378	1.14368	1.30352	1.4332	1.18654	1.16788	1.18118	1.20004	1.70408	1.68425	1.64386	1.36634	1.37436			536.2	0.927722	0.953295	0.93195	0.948675	0.945475	0.920327	1.00284	0.944925	1.12619	1.14015	1.15789	1.09166	1.53165	1.20292	1.27995	1.07133	0.936871	1.21988	1.10962	1.18242	1.47485
536.4	0.863253	0.858992	0.862423	0.856037	0.854231	1.02222	0.965713	1.02184	1.04742	1.08887	1.21931	1.24894	1.27984	1.14961	1.30993	1.43927	1.19205	1.17293	1.18685	1.20635	1.71081	1.69188	1.65047	1.3733	1.38128			536.4	0.931152	0.957121	0.935322	0.951807	0.948821	0.92401	1.00546	0.94878	1.12963	1.14285	1.16187	1.09502	1.53654	1.20605	1.28316	1.07522	0.939199	1.22423	1.11278	1.18494	1.47939
536.6	0.865945	0.861608	0.865054	0.858488	0.857016	1.02481	0.968211	1.02469	1.05015	1.09169	1.2221	1.25151	1.28245	1.15283	1.31334	1.44226	1.19508	1.17536	1.19038	1.20919	1.71472	1.69583	1.65398	1.37668	1.3847			536.6	0.933048	0.959138	0.936972	0.953342	0.950457	0.925755	1.00677	0.950042	1.13141	1.14424	1.16375	1.09661	1.53919	1.20785	1.28472	1.07719	0.940461	1.22629	1.11458	1.18618	1.48164
536.8	0.870963	0.866943	0.870526	0.863622	0.862249	1.02926	0.973598	1.03009	1.05561	1.09728	1.22736	1.25743	1.28791	1.15897	1.31992	1.44743	1.20008	1.18077	1.19633	1.2149	1.72088	1.70189	1.66057	1.38283	1.39153			536.8	0.936854	0.962766	0.940521	0.956548	0.953514	0.929437	1.00943	0.953394	1.13473	1.14673	1.16757	1.09943	1.54313	1.21117	1.28755	1.08051	0.94249	1.23012	1.11841	1.18903	1.48561
537	0.87397	0.869313	0.873369	0.866294	0.864854	1.0317	0.976202	1.03238	1.05834	1.09985	1.22977	1.26004	1.29053	1.16193	1.32313	1.45048	1.20234	1.18354	1.19938	1.21765	1.72401	1.70531	1.66392	1.38635	1.3948			537	0.938619	0.964519	0.942322	0.958225	0.954881	0.931104	1.01074	0.955226	1.13611	1.14801	1.16946	1.10104	1.54505	1.2127	1.28875	1.0823	0.943811	1.23204	1.11978	1.19013	1.4878
537.2	0.879004	0.87431	0.87791	0.87131	0.869698	1.0365	0.981051	1.03765	1.0633	1.10562	1.23475	1.26571	1.29625	1.16709	1.32935	1.45584	1.20755	1.18899	1.20495	1.22371	1.72936	1.71157	1.67035	1.39232	1.40111			537.2	0.942	0.96813	0.945623	0.961204	0.957779	0.934406	1.01315	0.95831	1.13908	1.15068	1.17309	1.10403	1.54836	1.21579	1.29124	1.08563	0.945564	1.23464	1.12347	1.19259	1.49182
537.4	0.882265	0.877949	0.880879	0.874539	0.873	1.03968	0.984488	1.04107	1.06658	1.10899	1.23782	1.2695	1.29986	1.17046	1.33336	1.45962	1.21107	1.19193	1.20894	1.22743	1.73325	1.71538	1.67439	1.39648	1.40519			537.4	0.944263	0.970198	0.947748	0.963297	0.959654	0.936572	1.01505	0.96036	1.14065	1.1521	1.17551	1.10578	1.5505	1.21756	1.29299	1.08777	0.946797	1.23692	1.12551	1.19403	1.4945
537.6	0.886157	0.881603	0.884804	0.878701	0.877101	1.04361	0.98874	1.04505	1.07074	1.1129	1.24181	1.27418	1.30504	1.17491	1.33819	1.46367	1.21533	1.1959	1.21371	1.23231	1.73838	1.72016	1.67948	1.4014	1.41017			537.6	0.946894	0.972599	0.950436	0.965671	0.961806	0.939193	1.01747	0.962868	1.14287	1.15392	1.17846	1.10791	1.55324	1.21995	1.29513	1.09033	0.948102	1.23965	1.12788	1.19588	1.4976
537.8	0.889487	0.884838	0.88797	0.881977	0.88037	1.047	0.992005	1.04829	1.07398	1.11604	1.24521	1.27746	1.30887	1.17816	1.34222	1.46698	1.2182	1.19928	1.21742	1.23608	1.74239	1.72428	1.68273	1.40556	1.41421			537.8	0.949071	0.9744	0.952233	0.967373	0.963576	0.941215	1.019	0.964982	1.14465	1.15533	1.1806	1.10997	1.55517	1.22155	1.29677	1.09241	0.949228	1.24187	1.12966	1.19714	1.49988
538	0.893505	0.88887	0.891518	0.885907	0.884546	1.05066	0.995285	1.05211	1.07809	1.11975	1.24938	1.28132	1.31289	1.18222	1.34716	1.4709	1.22241	1.20316	1.22191	1.24035	1.74716	1.72926	1.68773	1.41074	1.41888			538	0.951644	0.976258	0.954247	0.969266	0.965737	0.943519	1.02104	0.967358	1.14656	1.15705	1.18299	1.11254	1.55783	1.22373	1.29872	1.09485	0.950722	1.24432	1.1318	1.19857	1.50268
538.2	0.896616	0.891942	0.894765	0.888963	0.887751	1.05319	0.998023	1.05483	1.08101	1.12299	1.25265	1.28499	1.31653	1.18524	1.35083	1.47383	1.22521	1.20652	1.22529	1.24361	1.75046	1.73261	1.69141	1.41473	1.42253			538.2	0.953726	0.977749	0.956124	0.970952	0.967472	0.945305	1.02274	0.969162	1.14821	1.15809	1.18489	1.11426	1.55973	1.2256	1.30007	1.0966	0.951793	1.24631	1.13368	1.19949	1.50477
538.4	0.900114	0.895724	0.898443	0.892875	0.891679	1.05693	1.00156	1.05817	1.08467	1.127	1.25671	1.28942	1.3205	1.1893	1.35552	1.47759	1.22832	1.21034	1.22931	1.24769	1.75445	1.73794	1.69552	1.4192	1.42696			538.4	0.956453	0.979473	0.958365	0.972902	0.969642	0.94747	1.02485	0.971287	1.15003	1.15949	1.1873	1.11645	1.56207	1.22795	1.302	1.09886	0.953154	1.24897	1.13587	1.20085	1.50741
538.6	0.902775	0.898768	0.901485	0.895624	0.894471	1.06031	1.00423	1.0611	1.08768	1.13033	1.25981	1.29284	1.32412	1.19264	1.35915	1.48057	1.2316	1.21349	1.23277	1.25096	1.75803	1.74121	1.69872	1.42259	1.43027			538.6	0.95861	0.981059	0.959822	0.974539	0.971135	0.949381	1.02663	0.972826	1.15174	1.16073	1.18908	1.11796	1.56359	1.2294	1.3033	1.10057	0.954334	1.25098	1.13742	1.20207	1.50964
538.8	0.906029	0.902807	0.905334	0.899151	0.89805	1.06401	1.00813	1.06443	1.09123	1.1343	1.26339	1.2966	1.32845	1.19642	1.36323	1.48478	1.23563	1.21705	1.23685	1.25514	1.76266	1.74505	1.7027	1.42651	1.43442			538.8	0.961175	0.982674	0.961959	0.976505	0.973057	0.951772	1.0288	0.974897	1.15356	1.16206	1.19124	1.1197	1.56575	1.23148	1.30483	1.10265	0.955911	1.25372	1.13958	1.20335	1.51249
539	0.910205	0.907272	0.909176	0.902859	0.902058	1.06778	1.01224	1.06889	1.09573	1.13895	1.26769	1.30109	1.33252	1.20084	1.36809	1.48936	1.23993	1.22061	1.24165	1.25985	1.76705	1.75029	1.70772	1.43218	1.43976			539	0.963692	0.984382	0.964712	0.978461	0.975177	0.95439	1.03131	0.977493	1.15567	1.16357	1.19367	1.12195	1.56877	1.23411	1.30707	1.10514	0.957542	1.25593	1.14175	1.20478	1.51529
539.2	0.91181	0.909553	0.91132	0.90512	0.904051	1.06961	1.0146	1.07093	1.09802	1.14106	1.26981	1.3028	1.33435	1.20305	1.3705	1.4916	1.242	1.22276	1.24395	1.26203	1.76954	1.75307	1.70993	1.43488	1.44239			539.2	0.965119	0.9853	0.965625	0.979423	0.976092	0.955705	1.03235	0.978855	1.1566	1.16422	1.19479	1.12334	1.57015	1.23498	1.30799	1.1065	0.958147	1.25701	1.14297	1.2052	1.51673
539.4	0.916001	0.913866	0.915186	0.90912	0.908037	1.07374	1.01827	1.07548	1.10246	1.14538	1.27382	1.30684	1.33838	1.20729	1.37596	1.49656	1.24572	1.22682	1.24873	1.26658	1.77424	1.75756	1.71351	1.44046	1.44738			539.4	0.967681	0.986821	0.968272	0.981551	0.978365	0.95799	1.0345	0.980568	1.15841	1.16539	1.19757	1.12485	1.57201	1.23646	1.30949	1.10887	0.95984	1.25893	1.14486	1.20656	1.51981
539.6	0.917777	0.915713	0.917223	0.911258	0.910037	1.07556	1.01989	1.07743	1.10474	1.1475	1.27586	1.30911	1.34066	1.20945	1.37814	1.49805	1.2473	1.2285	1.25111	1.26879	1.77594	1.75993	1.71543	1.44303	1.44975			539.6	0.968871	0.987791	0.969079	0.982507	0.979196	0.959227	1.0358	0.982191	1.15884	1.16598	1.19867	1.12579	1.5729	1.23726	1.31015	1.11004	0.960619	1.25998	1.14605	1.20711	1.5211
539.8	0.921063	0.919753	0.920598	0.9153	0.913906	1.07928	1.0233	1.08209	1.10881	1.15146	1.27931	1.31263	1.34483	1.2135	1.38258	1.50198	1.25169	1.23264	1.25573	1.27324	1.78017	1.76374	1.72043	1.44759	1.45442			539.8	0.971434	0.989262	0.971547	0.984035	0.981288	0.961541	1.03825	0.983719	1.16005	1.16714	1.20073	1.1277	1.57482	1.23913	1.31153	1.11218	0.961724	1.26173	1.14825	1.20834	1.5235
540	0.922725	0.921526	0.922457	0.917165	0.915615	1.08134	1.02527	1.08375	1.11056	1.15312	1.28106	1.31469	1.34713	1.21557	1.38435	1.50373	1.25364	1.23486	1.25752	1.27529	1.78182	1.76599	1.72304	1.44992	1.45652			540	0.972568	0.989664	0.972856	0.984726	0.982182	0.962662	1.03898	0.98484	1.16102	1.16766	1.20161	1.12876	1.57549	1.23996	1.31216	1.11331	0.962244	1.26262	1.14926	1.20886	1.52452
540.2	0.926777	0.925328	0.925852	0.920546	0.919459	1.08487	1.02864	1.08771	1.11481	1.15711	1.28504	1.31868	1.35137	1.21954	1.38843	1.50798	1.25789	1.2385	1.2611	1.27893	1.78642	1.77029	1.72704	1.45484	1.46078			540.2	0.974745	0.990971	0.974781	0.986472	0.983831	0.964862	1.04074	0.986746	1.1627	1.16863	1.20363	1.13059	1.57764	1.24167	1.31332	1.11537	0.963379	1.26483	1.15103	1.20962	1.52716
540.4	0.928661	0.927705	0.928143	0.92281	0.922025	1.08717	1.03113	1.0902	1.11715	1.15979	1.28795	1.32089	1.35353	1.22233	1.39151	1.51018	1.26064	1.23996	1.26394	1.28148	1.78906	1.77282	1.72979	1.45804	1.4638			540.4	0.976093	0.991494	0.97591	0.987496	0.985228	0.96627	1.04193	0.988122	1.16351	1.16885	1.20479	1.1314	1.57874	1.24276	1.31423	1.11657	0.963864	1.26594	1.15227	1.20992	1.52862
540.6	0.931861	0.931069	0.931146	0.925609	0.925048	1.08995	1.03419	1.09335	1.12016	1.16289	1.29117	1.32373	1.35613	1.22573	1.39498	1.51264	1.26363	1.24194	1.26726	1.28437	1.79247	1.77579	1.7327	1.46184	1.46747			540.6	0.977844	0.992149	0.977837	0.988883	0.986658	0.967941	1.04355	0.989786	1.16426	1.16919	1.20595	1.13265	1.58037	1.244	1.31527	1.118	0.964649	1.26761	1.15365	1.21043	1.53039
540.8	0.934086	0.933512	0.933542	0.927762	0.927453	1.09203	1.03644	1.09561	1.12259	1.16541	1.2933	1.32597	1.35858	1.22859	1.39796	1.51418	1.26569	1.24412	1.26963	1.28715	1.79471	1.77806	1.73471	1.46478	1.47005			540.8	0.979173	0.992686	0.979173	0.989731	0.987534	0.969223	1.04463	0.990849	1.16507	1.16949	1.20687	1.1333	1.58138	1.24495	1.31575	1.11932	0.965335	1.26901	1.15473	1.21099	1.53151
541	0.937338	0.936727	0.936423	0.930673	0.930319	1.09459	1.03897	1.09841	1.12578	1.16835	1.29544	1.329	1.36103	1.23147	1.40134	1.51689	1.26797	1.24666	1.27252	1.2902	1.79694	1.78121	1.73734	1.46866	1.47317			541	0.980758	0.993243	0.980662	0.99096	0.988874	0.970942	1.04569	0.991855	1.16587	1.17004	1.20792	1.13435	1.58219	1.24573	1.31639	1.12092	0.965941	1.27038	1.15616	1.21156	1.53321
541.2	0.939467	0.938749	0.938404	0.93276	0.932651	1.0965	1.04096	1.10093	1.12817	1.17071	1.29725	1.33125	1.36306	1.23384	1.40378	1.51889	1.26971	1.24865	1.2747	1.29272	1.79919	1.78349	1.73987	1.47144	1.47573			541.2	0.982013	0.994133	0.982323	0.991704	0.989997	0.97209	1.04646	0.992829	1.16662	1.17034	1.20864	1.13475	1.58315	1.24659	1.31657	1.12188	0.966401	1.27125	1.15707	1.21198	1.53456
541.4	0.942412	0.94145	0.940761	0.93532	0.935297	1.09924	1.04393	1.10427	1.13076	1.17392	1.2995	1.3338	1.36596	1.23671	1.40673	1.52127	1.27188	1.2512	1.2777	1.29569	1.80175	1.78639	1.74253	1.47478	1.47913			541.4	0.983466	0.99533	0.983984	0.992574	0.991054	0.973634	1.04749	0.994114	1.16765	1.17073	1.20972	1.13551	1.58383	1.24738	1.31704	1.1228	0.967169	1.27239	1.15834	1.21233	1.53628
541.6	0.944466	0.943647	0.943067	0.937483	0.937425	1.10165	1.04586	1.10649	1.13321	1.17604	1.3011	1.33541	1.36828	1.23888	1.40917	1.52324	1.27389	1.25245	1.27985	1.29793	1.80368	1.7886	1.74477	1.47709	1.48154			541.6	0.984607	0.996063	0.985006	0.993332	0.991797	0.97471	1.04818	0.995145	1.16811	1.17089	1.21026	1.13618	1.58452	1.24811	1.31771	1.12395	0.967534	1.27284	1.15928	1.21268	1.53756
541.8	0.94719	0.946307	0.945416	0.94004	0.94019	1.10382	1.04831	1.10919	1.13603	1.17871	1.30332	1.33726	1.37129	1.24118	1.41213	1.52533	1.2765	1.25412	1.28219	1.30076	1.80625	1.79107	1.74709	1.48022	1.48456			541.8	0.985866	0.996627	0.986166	0.994328	0.992723	0.976065	1.04917	0.996318	1.16886	1.17099	1.21102	1.13676	1.58547	1.24886	1.31814	1.12513	0.967914	1.27364	1.16033	1.21295	1.53897
542	0.950581	0.949626	0.948143	0.942896	0.942896	1.10601	1.05128	1.11218	1.13915	1.18143	1.30572	1.33976	1.37394	1.2434	1.41568	1.52853	1.27828	1.25617	1.28548	1.30386	1.80852	1.79375	1.74973	1.48303	1.48816			542	0.987502	0.997032	0.988516	0.995166	0.993936	0.977564	1.05011	0.99714	1.16912	1.17102	1.21196	1.13747	1.58665	1.24978	1.31815	1.12635	0.96834	1.2739	1.16158	1.21307	1.54019
542.2	0.95186	0.95096	0.949489	0.944543	0.944462	1.10724	1.05274	1.11393	1.14039	1.18277	1.30706	1.34152	1.37493	1.24494	1.41767	1.52982	1.27926	1.25768	1.28733	1.30548	1.80922	1.79537	1.75132	1.48481	1.49003			542.2	0.988212	0.99721	0.989244	0.995553	0.994576	0.978082	1.05046	0.997929	1.16955	1.171	1.21234	1.13769	1.58683	1.2501	1.31829	1.12717	0.968433	1.27408	1.16174	1.21319	1.54069
542.4	0.954588	0.954066	0.952414	0.948069	0.947624	1.10992	1.05534	1.11674	1.14374	1.18568	1.30952	1.34443	1.37759	1.24772	1.4207	1.53181	1.28146	1.2605	1.29019	1.30837	1.81188	1.79794	1.754	1.48792	1.49301			542.4	0.989719	0.998116	0.990459	0.996267	0.995698	0.979335	1.05082	0.999	1.1701	1.17071	1.21325	1.13834	1.58732	1.25065	1.3181	1.12823	0.968845	1.27518	1.16249	1.21334	1.54146
542.6	0.955892	0.955543	0.953812	0.949264	0.949364	1.11122	1.05671	1.11828	1.14479	1.18696	1.31086	1.34554	1.379	1.24918	1.42201	1.53268	1.28266	1.26162	1.29155	1.30975	1.81239	1.7988	1.75504	1.48977	1.49469			542.6	0.990471	0.998388	0.991187	0.996711	0.99614	0.979805	1.0509	0.999661	1.17066	1.17067	1.21365	1.13811	1.58724	1.25108	1.31804	1.12859	0.969162	1.27524	1.16279	1.21356	1.54165
542.8	0.958561	0.958367	0.956365	0.952343	0.952192	1.11363	1.05917	1.12005	1.14726	1.18929	1.3132	1.34786	1.38134	1.25235	1.4246	1.5348	1.28483	1.2641	1.29416	1.31286	1.81438	1.80156	1.75833	1.49271	1.49755			542.8	0.991669	0.999038	0.992241	0.99794	0.996777	0.981124	1.05132	1.00083	1.17085	1.17064	1.21416	1.1389	1.58806	1.25176	1.31809	1.12938	0.969463	1.27609	1.16328	1.21344	1.5422
543	0.959932	0.959753	0.957758	0.953737	0.953546	1.11488	1.06067	1.12184	1.14844	1.1906	1.31394	1.34854	1.38247	1.25363	1.42621	1.53663	1.28618	1.2654	1.29562	1.31439	1.81521	1.80262	1.75962	1.49383	1.49924			543	0.992379	0.998825	0.993182	0.99815	0.997201	0.981719	1.05127	1.001	1.17108	1.17044	1.21459	1.13904	1.58815	1.25192	1.31814	1.12987	0.969806	1.27654	1.16356	1.21318	1.54259
543.2	0.962986	0.962151	0.960435	0.956189	0.956471	1.11733	1.06302	1.12397	1.15096	1.19303	1.31519	1.35118	1.38498	1.25661	1.42952	1.5386	1.28753	1.26776	1.29763	1.31707	1.81616	1.80438	1.76178	1.49661	1.50217			543.2	0.9937	0.999191	0.994681	0.998971	0.997581	0.982716	1.05143	1.00209	1.17106	1.17018	1.21506	1.13911	1.58804	1.25274	1.31776	1.1307	0.970172	1.27661	1.16384	1.21285	1.54335
543.4	0.964926	0.964232	0.961777	0.958222	0.958363	1.11875	1.0645	1.12606	1.15279	1.19483	1.31616	1.35249	1.38657	1.25812	1.43168	1.53957	1.28835	1.26869	1.2995	1.31908	1.81714	1.80514	1.76336	1.49858	1.50375			543.4	0.994505	0.999402	0.995309	0.999208	0.997944	0.983352	1.05152	1.00251	1.17091	1.17001	1.21541	1.139	1.58798	1.25295	1.31748	1.13113	0.970674	1.27635	1.16425	1.21261	1.54384
543.6	0.967223	0.966712	0.963864	0.960729	0.960701	1.12103	1.06653	1.12819	1.15421	1.19696	1.31717	1.35404	1.38807	1.25986	1.43365	1.54099	1.28907	1.26992	1.30158	1.32159	1.81765	1.80699	1.76484	1.50088	1.50586			543.6	0.995253	0.999491	0.996243	0.999416	0.998468	0.984089	1.05176	1.00311	1.17078	1.16971	1.21561	1.13903	1.58807	1.25307	1.31724	1.13174	0.971032	1.27641	1.16441	1.21231	1.5441
543.8	0.968917	0.968457	0.965558	0.96276	0.962509	1.12227	1.06756	1.1296	1.15575	1.19849	1.31732	1.35547	1.38947	1.26115	1.43511	1.5423	1.29009	1.27164	1.30267	1.32349	1.81835	1.80799	1.76627	1.50235	1.50736			543.8	0.995931	0.999756	0.996813	0.999499	0.998709	0.984427	1.05184	1.00307	1.17091	1.16967	1.21583	1.13907	1.5882	1.25312	1.31707	1.13195	0.971499	1.27639	1.16455	1.21209	1.54411
544	0.97085	0.970341	0.967873	0.96502	0.964745	1.1244	1.0693	1.13131	1.15765	1.20034	1.31788	1.35667	1.39135	1.2628	1.437	1.54392	1.29183	1.27426	1.3042	1.32571	1.81939	1.80947	1.76805	1.5045	1.50923			544	0.996602	0.999891	0.99724	0.999449	0.999089	0.985026	1.05207	1.00321	1.17113	1.16937	1.21617	1.13911	1.58813	1.25335	1.3165	1.13218	0.972001	1.27636	1.16456	1.21146	1.54423
544.2	0.972397	0.971707	0.969257	0.966674	0.966412	1.12609	1.07048	1.13255	1.15913	1.20165	1.31894	1.35797	1.39262	1.26357	1.43831	1.54546	1.29297	1.27524	1.30542	1.3269	1.82029	1.81062	1.76952	1.5059	1.51084			544.2	0.997069	1	0.997553	0.99957	0.999443	0.985519	1.05191	1.00353	1.17107	1.16881	1.21636	1.13925	1.58779	1.25347	1.31612	1.13233	0.971973	1.27597	1.16482	1.21069	1.54411
544.4	0.973841	0.973495	0.970963	0.968558	0.968253	1.12823	1.07202	1.13436	1.16116	1.20334	1.32043	1.35886	1.39439	1.2653	1.44005	1.54661	1.29433	1.2763	1.30723	1.32874	1.82136	1.81176	1.77101	1.50797	1.51268			544.4	0.997707	0.999971	0.997923	0.999464	0.999878	0.985947	1.0517	1.0042	1.17105	1.16812	1.21671	1.13927	1.5872	1.25383	1.3156	1.1326	0.972257	1.27546	1.16494	1.2099	1.54389
544.6	0.975271	0.975075	0.972747	0.970197	0.969806	1.1293	1.07336	1.13557	1.16221	1.20455	1.32114	1.36028	1.39496	1.26667	1.44135	1.54741	1.2957	1.27718	1.30834	1.33006	1.82202	1.81253	1.77213	1.50942	1.51423			544.6	0.998051	0.999392	0.998025	0.999677	0.999909	0.98633	1.05165	1.00423	1.17068	1.16765	1.2168	1.13926	1.58675	1.25401	1.31513	1.13274	0.972442	1.27533	1.165	1.20927	1.54356
544.8	0.976488	0.976758	0.975271	0.972353	0.971752	1.1303	1.07493	1.13701	1.16359	1.20599	1.32204	1.3624	1.39543	1.26794	1.44319	1.54858	1.29671	1.27807	1.30984	1.33186	1.82233	1.81356	1.77346	1.51102	1.51577			544.8	0.998575	0.998792	0.998687	1	1	0.9867	1.0512	1.0046	1.17036	1.16677	1.21672	1.13906	1.58639	1.25421	1.31434	1.13321	0.972379	1.27515	1.16472	1.20849	1.54317
545	0.978045	0.97872	0.977309	0.974238	0.973952	1.13151	1.07677	1.13887	1.16465	1.20784	1.32296	1.36422	1.39607	1.26987	1.44487	1.55004	1.29835	1.2797	1.31184	1.33378	1.82321	1.81484	1.77453	1.51321	1.51754			545	0.999187	0.998171	0.999137	0.999667	0.999949	0.9872	1.05097	1.00452	1.17038	1.16588	1.21682	1.13868	1.58594	1.25364	1.31317	1.13324	0.973031	1.2748	1.16432	1.20728	1.54277
545.2	0.979081	0.98012	0.978684	0.975272	0.974917	1.13245	1.07759	1.13983	1.16525	1.20868	1.32331	1.36489	1.39647	1.27072	1.44586	1.55074	1.29905	1.2801	1.31311	1.3346	1.82334	1.81517	1.77548	1.51457	1.51837			545.2	0.999451	0.99813	0.999421	0.999678	0.999918	0.987413	1.05061	1.00446	1.17003	1.16554	1.21678	1.1387	1.58539	1.25332	1.31278	1.13321	0.973202	1.27438	1.16394	1.20687	1.54276
545.4	0.980728	0.98202	0.980608	0.977712	0.977269	1.1339	1.07924	1.14162	1.16665	1.21063	1.3242	1.36587	1.39745	1.27274	1.44767	1.55089	1.30077	1.28129	1.31466	1.33656	1.82386	1.81583	1.77691	1.51673	1.5202			545.4	0.999407	0.997775	0.999492	0.9993	0.99964	0.987866	1.04989	1.00472	1.16967	1.16448	1.21649	1.1382	1.58431	1.25293	1.31212	1.13304	0.973657	1.27388	1.16345	1.20526	1.54219
545.6	0.981806	0.982727	0.981509	0.978573	0.978163	1.13445	1.0796	1.14244	1.16758	1.21164	1.32472	1.36637	1.39841	1.27393	1.44873	1.5511	1.30104	1.2815	1.31527	1.33744	1.82416	1.81608	1.77723	1.51747	1.52062			545.6	0.999471	0.997452	0.99951	0.999013	0.99945	0.988076	1.04958	1.00457	1.16942	1.16384	1.21618	1.13804	1.58429	1.2528	1.31159	1.1328	0.973759	1.27366	1.16352	1.20463	1.54188
545.8	0.983155	0.984357	0.983355	0.979897	0.980229	1.13553	1.08105	1.14387	1.1689	1.21311	1.32541	1.36675	1.39925	1.27533	1.4507	1.55159	1.30253	1.28232	1.31679	1.33907	1.82407	1.81674	1.77844	1.51905	1.52209			545.8	0.999802	0.996228	0.999587	0.998826	0.999272	0.98816	1.04927	1.00415	1.16864	1.16279	1.21581	1.13725	1.58296	1.25252	1.31023	1.13245	0.973895	1.2726	1.1632	1.20308	1.54106
546	0.984589	0.985589	0.98466	0.980996	0.981358	1.13666	1.08182	1.14477	1.17026	1.2141	1.32584	1.36741	1.39987	1.27593	1.45175	1.5522	1.30298	1.28257	1.31762	1.33994	1.82406	1.8166	1.77909	1.51997	1.52275			546	0.999819	0.99531	0.999752	0.998439	0.999239	0.988201	1.04905	1.00372	1.168	1.1619	1.21545	1.13677	1.58267	1.25197	1.30934	1.13231	0.974017	1.27201	1.16311	1.20208	1.54049
546.2	0.985982	0.987191	0.986325	0.982338	0.98273	1.13747	1.08278	1.14646	1.17163	1.21478	1.32631	1.36873	1.40085	1.27684	1.45305	1.55253	1.30389	1.28271	1.31896	1.34057	1.82372	1.81599	1.77953	1.52099	1.52331			546.2	1	0.994155	1	0.997752	0.999184	0.988421	1.04883	1.00355	1.16732	1.16068	1.21512	1.13597	1.58223	1.25149	1.30819	1.13191	0.973928	1.27083	1.16299	1.20083	1.53977
546.4	0.987001	0.98827	0.98707	0.983598	0.98368	1.13793	1.0836	1.14703	1.17247	1.21563	1.32706	1.36871	1.40144	1.27781	1.45363	1.55284	1.3046	1.28281	1.31961	1.34127	1.82339	1.81597	1.77951	1.52188	1.52354			546.4	0.999813	0.993605	0.99975	0.997437	0.999074	0.988412	1.04813	1.00334	1.16711	1.1596	1.21479	1.13517	1.58174	1.25078	1.30713	1.13159	0.973687	1.27002	1.16256	1.19993	1.53911
546.6	0.988376	0.989391	0.987884	0.984915	0.984625	1.13828	1.0846	1.14815	1.17343	1.21664	1.32752	1.36885	1.40181	1.27851	1.45457	1.55261	1.30531	1.28275	1.32067	1.34198	1.82338	1.81694	1.77959	1.52275	1.52418			546.6	0.99962	0.992711	0.999427	0.997061	0.99884	0.988341	1.04741	1.00288	1.16663	1.15801	1.21432	1.1344	1.58097	1.24979	1.306	1.13118	0.97364	1.26918	1.16224	1.19862	1.53798
546.8	0.988697	0.990054	0.989144	0.985969	0.985609	1.13867	1.08535	1.14849	1.17347	1.21716	1.3275	1.36905	1.4024	1.27898	1.45539	1.55297	1.306	1.28302	1.3214	1.34251	1.82283	1.81708	1.7794	1.52335	1.52492			546.8	0.999462	0.99182	0.99954	0.996786	0.998651	0.988078	1.0467	1.00248	1.166	1.15679	1.21361	1.13389	1.5802	1.24914	1.30496	1.13074	0.973133	1.26855	1.16188	1.19765	1.53692
547	0.989177	0.990845	0.990386	0.987252	0.986651	1.13888	1.08617	1.14927	1.17419	1.2176	1.32763	1.36902	1.40315	1.27935	1.45691	1.55311	1.30669	1.28313	1.32209	1.34315	1.82246	1.81684	1.77923	1.52392	1.52583			547	0.999417	0.990541	0.999455	0.99645	0.998257	0.98789	1.04587	1.00237	1.16537	1.15553	1.21271	1.13312	1.57859	1.24835	1.30352	1.13023	0.972749	1.26735	1.16126	1.19629	1.53577
547.2	0.989759	0.991533	0.991439	0.988037	0.987465	1.13961	1.08663	1.15034	1.17429	1.2178	1.32863	1.36909	1.40359	1.27978	1.45756	1.55308	1.30726	1.28316	1.32307	1.3437	1.82206	1.81637	1.77862	1.52461	1.52633			547.2	0.999124	0.989352	0.999198	0.996209	0.997907	0.987849	1.04521	1.00223	1.16464	1.15426	1.21206	1.13241	1.57737	1.24787	1.30222	1.12977	0.972305	1.26652	1.16069	1.19508	1.53492
547.4	0.990681	0.992596	0.992208	0.988866	0.988501	1.13987	1.087	1.15134	1.17447	1.21812	1.329	1.36984	1.40356	1.28029	1.45804	1.5527	1.30744	1.28316	1.32417	1.34453	1.82118	1.8157	1.77823	1.52531	1.52671			547.4	0.998778	0.988038	0.999034	0.995934	0.997285	0.98763	1.044	1.00191	1.16386	1.15265	1.2111	1.13099	1.57598	1.2468	1.3008	1.12916	0.971801	1.2653	1.16002	1.19363	1.53373
547.6	0.991731	0.993854	0.993483	0.990581	0.989447	1.14038	1.08782	1.15224	1.17437	1.21884	1.32861	1.37003	1.40357	1.28104	1.45844	1.55175	1.30739	1.28305	1.32487	1.34542	1.81978	1.81529	1.77745	1.52576	1.52713			547.6	0.998524	0.986788	0.998658	0.995098	0.996595	0.986898	1.04249	1.00157	1.16257	1.15104	1.20976	1.12936	1.57419	1.24535	1.29895	1.12822	0.971423	1.26343	1.15913	1.19179	1.53222
547.8	0.992213	0.994675	0.993892	0.991109	0.989984	1.13992	1.08845	1.15249	1.17396	1.21903	1.32858	1.37079	1.40363	1.28118	1.45868	1.55162	1.30748	1.28289	1.32523	1.34533	1.81947	1.81505	1.77742	1.52593	1.52751			547.8	0.998394	0.986141	0.998465	0.99475	0.996241	0.986653	1.04191	1.00159	1.16198	1.14989	1.20907	1.12839	1.57344	1.24451	1.29799	1.12766	0.971256	1.26277	1.15869	1.19088	1.53138
548	0.992927	0.995306	0.994294	0.991931	0.991282	1.14036	1.08881	1.15314	1.17453	1.21958	1.32852	1.37057	1.40396	1.28124	1.45911	1.55105	1.30755	1.28263	1.32598	1.34568	1.81834	1.81413	1.7767	1.52578	1.528			548	0.998086	0.984849	0.998115	0.993682	0.995618	0.986137	1.04067	1.00157	1.16062	1.14741	1.20779	1.12698	1.57187	1.2432	1.29598	1.12648	0.970439	1.26106	1.15743	1.18905	1.52965
548.2	0.993393	0.995832	0.994457	0.992535	0.991668	1.14104	1.08908	1.15341	1.17505	1.21962	1.32892	1.36999	1.40445	1.28176	1.45911	1.55089	1.30759	1.2827	1.32617	1.34603	1.81865	1.81327	1.77617	1.52602	1.52839			548.2	0.99804	0.984229	0.997809	0.993192	0.995117	0.985919	1.03997	1.00111	1.1599	1.14655	1.20727	1.12614	1.57105	1.24231	1.29488	1.12581	0.970032	1.26017	1.15689	1.1881	1.52857
548.4	0.994334	0.996728	0.994847	0.994147	0.992613	1.14137	1.08924	1.15311	1.17513	1.21952	1.32893	1.36952	1.4044	1.28225	1.45937	1.55121	1.30763	1.28279	1.32675	1.3467	1.81748	1.81192	1.77499	1.52628	1.52841			548.4	0.99749	0.983008	0.998015	0.992367	0.994221	0.985244	1.03828	0.999934	1.15801	1.1447	1.20571	1.12427	1.56909	1.24075	1.29305	1.12463	0.969143	1.25848	1.15546	1.18626	1.52654
548.6	0.994658	0.996838	0.995126	0.994327	0.993199	1.1417	1.08961	1.15374	1.17526	1.21956	1.32857	1.36931	1.40417	1.2827	1.45962	1.55041	1.30721	1.28299	1.327	1.3466	1.81651	1.81113	1.77429	1.52592	1.52815			548.6	0.99712	0.982095	0.997563	0.991582	0.993691	0.984701	1.03721	0.999341	1.15708	1.14323	1.20483	1.12311	1.56765	1.2398	1.29148	1.12389	0.968614	1.25678	1.15468	1.18478	1.5249
548.8	0.995257	0.997264	0.995354	0.994954	0.994079	1.14176	1.08988	1.15448	1.17547	1.21955	1.32836	1.36922	1.40402	1.28282	1.45952	1.5498	1.30707	1.28304	1.32706	1.34639	1.81586	1.80996	1.77439	1.52582	1.52795			548.8	0.996618	0.980878	0.997104	0.9909	0.993075	0.983941	1.03579	0.998613	1.15575	1.14124	1.20363	1.12176	1.56563	1.23816	1.28946	1.12295	0.967799	1.25471	1.15375	1.1831	1.52318
549	0.99582	0.997695	0.995892	0.995737	0.994657	1.14209	1.09031	1.15464	1.17528	1.21931	1.3282	1.36894	1.40389	1.28268	1.45959	1.54904	1.30716	1.28304	1.32693	1.34627	1.81472	1.80884	1.77306	1.52567	1.5281			549	0.996089	0.980005	0.996983	0.990077	0.992396	0.983372	1.03458	0.998104	1.15473	1.13972	1.20258	1.12055	1.5639	1.23672	1.2879	1.12219	0.966969	1.25352	1.15287	1.18166	1.52181
549.2	0.99643	0.997926	0.996325	0.996813	0.995492	1.14278	1.0904	1.15502	1.17507	1.21924	1.32782	1.36918	1.4038	1.2824	1.4593	1.54823	1.30658	1.28252	1.32676	1.34627	1.81346	1.80683	1.77158	1.52542	1.52803			549.2	0.995357	0.978852	0.996255	0.988745	0.991511	0.982539	1.03277	0.997379	1.15364	1.13788	1.20125	1.11921	1.56181	1.23501	1.28576	1.12123	0.966213	1.25177	1.15187	1.17986	1.51993
549.4	0.996479	0.997973	0.996441	0.997167	0.995835	1.14235	1.09005	1.15508	1.17472	1.21919	1.32741	1.36874	1.40328	1.28225	1.45918	1.54736	1.30647	1.28229	1.32669	1.34633	1.81258	1.80587	1.77087	1.5249	1.52813			549.4	0.994681	0.977904	0.995704	0.988129	0.990632	0.981982	1.03131	0.996795	1.15234	1.13625	1.20008	1.11783	1.55984	1.23376	1.28416	1.12034	0.965522	1.24993	1.15068	1.17834	1.51826
549.6	0.996976	0.998248	0.997018	0.99765	0.996538	1.14238	1.08963	1.15492	1.17463	1.21931	1.32659	1.36778	1.40269	1.28176	1.45874	1.54615	1.30618	1.28215	1.32685	1.34654	1.81118	1.80438	1.76998	1.52434	1.52789			549.6	0.993874	0.976666	0.995015	0.987254	0.989601	0.981126	1.02944	0.995612	1.15064	1.13408	1.1986	1.11603	1.55706	1.23185	1.28206	1.11941	0.964538	1.24774	1.1492	1.17634	1.51621
549.8	0.997651	0.998459	0.997973	0.997822	0.997068	1.14205	1.08929	1.15491	1.17422	1.21912	1.32594	1.36726	1.40178	1.28116	1.45881	1.54538	1.30611	1.28179	1.32697	1.34631	1.80988	1.80328	1.76889	1.52405	1.52764			549.8	0.99336	0.975397	0.994713	0.986425	0.988791	0.98033	1.02792	0.994813	1.14936	1.13257	1.1973	1.11443	1.55495	1.23055	1.28032	1.11839	0.963781	1.24614	1.14813	1.1747	1.5144
550	0.997747	0.999101	0.998487	0.99829	0.997555	1.14232	1.0895	1.15512	1.17419	1.21907	1.32521	1.36601	1.40119	1.28069	1.45818	1.54464	1.30601	1.28109	1.32691	1.34603	1.80816	1.80129	1.76743	1.52377	1.52722			550	0.992662	0.973903	0.994259	0.985355	0.987825	0.979563	1.02599	0.993894	1.14792	1.13072	1.19554	1.11256	1.55237	1.22884	1.27819	1.11697	0.962604	1.24405	1.14655	1.17258	1.51237
550.2	0.998815	0.999416	0.998799	0.998502	0.997827	1.14205	1.08897	1.15474	1.17431	1.21897	1.32474	1.3644	1.3996	1.28096	1.45773	1.54229	1.30526	1.28086	1.32663	1.3455	1.80633	1.79911	1.76519	1.52277	1.52659			550.2	0.991752	0.971999	0.993371	0.983944	0.986455	0.978553	1.02364	0.99289	1.1459	1.12829	1.19384	1.11041	1.5493	1.22642	1.27527	1.11536	0.961727	1.24087	1.14434	1.17001	1.50977
550.4	0.999011	0.999371	0.999274	0.998445	0.997924	1.14193	1.08878	1.15445	1.174	1.21884	1.32416	1.36402	1.3991	1.28086	1.45717	1.54153	1.30524	1.2806	1.32676	1.3452	1.8055	1.79822	1.7648	1.52244	1.52627			550.4	0.991401	0.971183	0.992919	0.983137	0.985774	0.977933	1.02264	0.992037	1.1447	1.12665	1.19284	1.10913	1.54831	1.22539	1.27393	1.11442	0.960892	1.23934	1.14339	1.16889	1.5084
550.6	0.998874	0.999537	0.999505	0.998622	0.99863	1.14178	1.08905	1.15375	1.17411	1.21843	1.32238	1.36339	1.39785	1.28112	1.45621	1.53961	1.30422	1.27919	1.32635	1.34482	1.80337	1.79692	1.76362	1.52128	1.52574			550.6	0.990368	0.969811	0.992368	0.981406	0.984085	0.976555	1.02015	0.990203	1.14256	1.12389	1.19079	1.10701	1.5457	1.2225	1.27103	1.11269	0.959784	1.23645	1.14138	1.16649	1.5057
550.8	0.999048	0.999758	0.999567	0.999285	0.998788	1.14148	1.08892	1.15327	1.17415	1.21827	1.3219	1.36315	1.39716	1.28056	1.45616	1.53925	1.30368	1.27838	1.32604	1.34453	1.80269	1.79558	1.76274	1.52052	1.52554			550.8	0.990086	0.969027	0.99216	0.980516	0.983442	0.976007	1.0192	0.989465	1.14145	1.12257	1.18991	1.10594	1.54404	1.22154	1.26964	1.11193	0.959004	1.23513	1.1404	1.1652	1.50424
551	0.999323	1	0.999695	0.999466	0.999248	1.14075	1.08848	1.15356	1.17381	1.21724	1.32061	1.36181	1.39583	1.28007	1.45558	1.53778	1.30294	1.27767	1.32523	1.34389	1.8005	1.79394	1.76116	1.51938	1.52454			551	0.988862	0.966845	0.991547	0.978998	0.981724	0.974921	1.01687	0.987592	1.13916	1.12006	1.18784	1.10324	1.54133	1.21916	1.26653	1.11016	0.957236	1.23264	1.13839	1.16228	1.50143
551.2	0.999455	0.999994	0.999949	0.999622	0.999492	1.14074	1.08818	1.15369	1.17339	1.2168	1.31982	1.36049	1.39504	1.27952	1.45511	1.53706	1.30247	1.27682	1.32465	1.34359	1.79871	1.79269	1.75995	1.51857	1.52367			551.2	0.987907	0.965618	0.991005	0.97796	0.980612	0.974046	1.01528	0.986225	1.13749	1.11839	1.18625	1.10168	1.53902	1.21737	1.26463	1.10889	0.956217	1.23079	1.13692	1.16039	1.49917
551.4	0.999576	0.999943	1	0.999986	0.999641	1.14038	1.08804	1.1532	1.17314	1.2161	1.31905	1.35917	1.39425	1.27879	1.45434	1.53537	1.30142	1.27608	1.32404	1.3428	1.79605	1.79099	1.75836	1.51775	1.52249			551.4	0.986742	0.96401	0.9901	0.976683	0.979331	0.972945	1.01301	0.984547	1.13572	1.11636	1.18425	1.09962	1.53581	1.21503	1.26227	1.10741	0.954804	1.22784	1.13523	1.1579	1.49673
551.6	0.999605	0.999945	0.999917	0.99968	0.999839	1.13992	1.08796	1.15324	1.17287	1.21582	1.31771	1.35857	1.3932	1.27837	1.45366	1.5336	1.30106	1.27513	1.3236	1.34188	1.7941	1.78958	1.7572	1.51713	1.52153			551.6	0.985766	0.962478	0.989136	0.975231	0.978243	0.971959	1.01142	0.983243	1.13422	1.11445	1.18293	1.09779	1.5335	1.21329	1.25998	1.10613	0.953661	1.22563	1.13381	1.15608	1.49481
551.8	1	0.999457	0.999833	0.99942	0.999988	1.13925	1.08779	1.1532	1.17233	1.21533	1.31642	1.3575	1.39143	1.2774	1.45274	1.53132	1.30029	1.27392	1.32317	1.34105	1.79184	1.78764	1.75538	1.516	1.52053			551.8	0.984547	0.96065	0.987963	0.973742	0.976912	0.970883	1.00931	0.981744	1.13236	1.11199	1.181	1.09559	1.53062	1.2111	1.25705	1.10456	0.951866	1.22269	1.13198	1.15367	1.49249
552	0.999778	0.999197	0.999961	0.999842	1	1.13859	1.0872	1.15249	1.17205	1.21472	1.31563	1.35682	1.39046	1.27671	1.45142	1.53071	1.29993	1.27307	1.3227	1.34056	1.79008	1.78565	1.75405	1.51546	1.51989			552	0.983493	0.959108	0.98713	0.972482	0.975724	0.969787	1.00744	0.980513	1.13103	1.11003	1.17946	1.09374	1.52834	1.20918	1.25471	1.10313	0.950422	1.22106	1.13049	1.15171	1.49049
552.2	0.999777	0.998812	0.999873	0.999921	0.999804	1.13781	1.08652	1.15156	1.17127	1.21386	1.31436	1.35596	1.38934	1.27603	1.45013	1.52931	1.29919	1.27188	1.32209	1.34005	1.78765	1.78403	1.7517	1.51471	1.51891			552.2	0.982245	0.957057	0.985982	0.970608	0.974187	0.968512	1.00524	0.978932	1.12889	1.10755	1.17748	1.0915	1.52545	1.20695	1.25189	1.10129	0.948611	1.21889	1.12845	1.14902	1.48783
552.4	0.999343	0.99882	0.999596	1	0.999668	1.13747	1.08573	1.15092	1.17087	1.21293	1.31302	1.35489	1.38797	1.2752	1.44916	1.52798	1.2981	1.27074	1.32183	1.33934	1.78549	1.78237	1.75011	1.51406	1.51773			552.4	0.981323	0.955354	0.984838	0.969479	0.972944	0.967338	1.00352	0.977688	1.12701	1.10552	1.17593	1.08958	1.52292	1.20518	1.24962	1.09977	0.946973	1.21658	1.12674	1.14687	1.48545
552.6	0.99921	0.998968	0.999304	0.999828	0.999214	1.1365	1.08547	1.14992	1.17029	1.2116	1.31162	1.35294	1.3866	1.27414	1.44828	1.52617	1.29721	1.26925	1.32109	1.33846	1.78279	1.78078	1.74833	1.51274	1.51618			552.6	0.980173	0.953323	0.983723	0.968181	0.971292	0.966166	1.00144	0.976122	1.12445	1.1029	1.17369	1.0873	1.52005	1.20286	1.24685	1.09785	0.944817	1.21345	1.12453	1.14416	1.48277
552.8	0.998649	0.998849	0.998827	0.999873	0.999305	1.13554	1.08537	1.1491	1.16918	1.21055	1.30937	1.35104	1.38475	1.27284	1.44643	1.52383	1.29527	1.26758	1.31962	1.33702	1.78006	1.77831	1.74527	1.51115	1.51453			552.8	0.978929	0.951173	0.982801	0.966161	0.969307	0.964132	0.998845	0.973847	1.12236	1.09973	1.17093	1.08443	1.51635	1.20016	1.24356	1.09547	0.942284	1.21027	1.1221	1.14085	1.47944
553	0.998275	0.998566	0.998432	0.999746	0.999417	1.13486	1.08552	1.14861	1.16853	1.21017	1.30924	1.35023	1.38379	1.27258	1.44552	1.52257	1.29426	1.26691	1.31864	1.33634	1.77866	1.77747	1.74357	1.51022	1.5139			553	0.978116	0.949791	0.98209	0.96503	0.968318	0.963182	0.997184	0.97296	1.12106	1.0982	1.16948	1.08286	1.5149	1.19878	1.24185	1.09418	0.940944	1.20881	1.12076	1.13921	1.47762
553.2	0.997204	0.998293	0.99728	0.999493	0.999066	1.1341	1.08501	1.14774	1.16733	1.2089	1.3073	1.34919	1.38228	1.27149	1.44367	1.51972	1.29176	1.26498	1.31769	1.33503	1.77633	1.77431	1.74132	1.50831	1.51236			553.2	0.976447	0.947643	0.980078	0.962625	0.966027	0.961369	0.994481	0.970563	1.11813	1.0949	1.16674	1.08017	1.51144	1.19568	1.23809	1.09177	0.938097	1.20541	1.11792	1.1359	1.47419
553.4	0.997254	0.997961	0.997311	0.99954	0.998954	1.13352	1.08412	1.14705	1.1666	1.20792	1.30592	1.34827	1.38141	1.2704	1.44255	1.5184	1.29057	1.26389	1.31655	1.33423	1.7744	1.77226	1.73952	1.50757	1.51133			553.4	0.97518	0.946111	0.978975	0.961148	0.964686	0.960162	0.992689	0.969312	1.11629	1.09262	1.16486	1.07817	1.50875	1.19397	1.2357	1.09008	0.936281	1.20326	1.11648	1.13352	1.4716
553.6	0.997077	0.997685	0.997129	0.999157	0.998875	1.13283	1.08331	1.14669	1.16543	1.2064	1.30359	1.34705	1.38005	1.26866	1.44114	1.51668	1.28941	1.26221	1.31516	1.3329	1.77155	1.76968	1.73692	1.50585	1.50988			553.6	0.973608	0.944401	0.97775	0.959318	0.962739	0.958622	0.99035	0.967438	1.11405	1.0897	1.1625	1.07569	1.5054	1.19158	1.23261	1.08811	0.933909	1.20041	1.1145	1.13056	1.46847
553.8	0.996737	0.997639	0.996598	0.999085	0.998654	1.13214	1.0828	1.14638	1.16481	1.20548	1.30181	1.34523	1.37842	1.2677	1.44015	1.51491	1.28839	1.26137	1.3141	1.3317	1.76924	1.76729	1.73498	1.50472	1.50877			553.8	0.972395	0.942759	0.97678	0.95808	0.961362	0.957463	0.988121	0.966025	1.11211	1.08745	1.1607	1.07357	1.50252	1.18965	1.23025	1.0866	0.931747	1.19797	1.11269	1.12809	1.46602
554	0.996565	0.997179	0.995931	0.998545	0.998386	1.13104	1.08172	1.14594	1.164	1.20421	1.30017	1.34314	1.37631	1.26641	1.43859	1.51269	1.28651	1.25985	1.31256	1.33015	1.76653	1.76378	1.73209	1.50317	1.50671			554	0.970899	0.940507	0.975806	0.956454	0.959575	0.955839	0.985656	0.964073	1.10968	1.08463	1.15834	1.07066	1.49837	1.18726	1.22725	1.08468	0.929219	1.19471	1.11019	1.12499	1.46269
554.2	0.99611	0.996709	0.995361	0.997951	0.998253	1.13016	1.08103	1.1449	1.16291	1.20329	1.29851	1.3415	1.37494	1.26545	1.43734	1.51047	1.28532	1.25826	1.31117	1.32876	1.76402	1.76119	1.72965	1.50168	1.50541			554.2	0.969608	0.939005	0.974544	0.955027	0.958273	0.954397	0.983682	0.962654	1.10793	1.08228	1.15637	1.06878	1.49546	1.18513	1.22459	1.08286	0.927335	1.19225	1.10847	1.12285	1.46015
554.4	0.995131	0.996298	0.994596	0.997251	0.997887	1.12906	1.08011	1.14356	1.16173	1.20203	1.29642	1.33902	1.37339	1.26438	1.43558	1.50826	1.28374	1.2564	1.3099	1.32709	1.76148	1.75804	1.72683	1.50009	1.50364			554.4	0.968066	0.93717	0.972918	0.953142	0.956672	0.952783	0.981525	0.960762	1.1056	1.07934	1.15402	1.06652	1.49159	1.18247	1.22152	1.08055	0.92485	1.18913	1.10588	1.12016	1.45694
554.6	0.994663	0.995434	0.994252	0.996938	0.997509	1.12802	1.07948	1.1424	1.16088	1.20086	1.29474	1.33747	1.37181	1.26348	1.43422	1.5057	1.28219	1.25541	1.30838	1.32603	1.75846	1.75533	1.72459	1.49842	1.50191			554.6	0.966726	0.935603	0.971661	0.951587	0.955109	0.951375	0.979577	0.958998	1.10382	1.07678	1.15199	1.06417	1.48907	1.18043	1.21884	1.07868	0.922579	1.18629	1.10405	1.1176	1.45436
554.8	0.994124	0.994907	0.993524	0.996394	0.996834	1.12674	1.07888	1.14127	1.15941	1.19943	1.29263	1.33537	1.36994	1.2622	1.43232	1.50347	1.27998	1.25339	1.30685	1.32469	1.75534	1.75223	1.72179	1.49682	1.49989			554.8	0.965035	0.933755	0.970264	0.9497	0.953113	0.949558	0.977203	0.957121	1.10155	1.07365	1.14958	1.06128	1.4853	1.17779	1.21558	1.07643	0.919826	1.18349	1.10173	1.11454	1.45098
555	0.993449	0.994269	0.993329	0.996098	0.995715	1.1254	1.07717	1.14003	1.1579	1.19756	1.29096	1.33228	1.36786	1.26029	1.43047	1.50044	1.27782	1.2507	1.30438	1.32273	1.75154	1.74863	1.71788	1.4939	1.49775			555	0.963163	0.931369	0.96823	0.947847	0.950831	0.947198	0.974286	0.954997	1.09855	1.06987	1.14636	1.05814	1.48024	1.17462	1.21198	1.07366	0.916371	1.17973	1.09871	1.11054	1.44708
555.2	0.992949	0.99438	0.992828	0.995697	0.99523	1.12501	1.07656	1.13934	1.15734	1.19693	1.28973	1.33127	1.36708	1.2595	1.42931	1.49887	1.27629	1.24963	1.30284	1.32139	1.7491	1.74614	1.71609	1.4929	1.49666			555.2	0.962075	0.929818	0.967371	0.9465	0.949735	0.946106	0.972965	0.953975	1.09708	1.06798	1.14466	1.05662	1.47786	1.17298	1.21018	1.07219	0.914567	1.17805	1.09733	1.10858	1.44487
555.4	0.991994	0.993551	0.992209	0.994929	0.994445	1.12333	1.07494	1.13832	1.15555	1.19536	1.28698	1.32862	1.36479	1.25778	1.42743	1.49536	1.27302	1.24737	1.30018	1.31904	1.74583	1.74273	1.71224	1.48952	1.49423			555.4	0.960261	0.92701	0.965859	0.944212	0.9472	0.944147	0.970107	0.95168	1.09384	1.06442	1.14105	1.0533	1.4731	1.17	1.20647	1.06956	0.911098	1.1735	1.09433	1.10503	1.44021
555.6	0.991088	0.992877	0.991881	0.99431	0.993937	1.12222	1.07405	1.13755	1.15448	1.19432	1.28557	1.32675	1.36292	1.25652	1.42606	1.49305	1.27147	1.24577	1.29848	1.3177	1.74338	1.73996	1.70999	1.48778	1.49262			555.6	0.958874	0.925348	0.964771	0.942865	0.945505	0.942653	0.968225	0.949674	1.09172	1.06205	1.13897	1.0512	1.46983	1.16767	1.20379	1.06755	0.90907	1.17077	1.09225	1.1027	1.43748
555.8	0.990289	0.991958	0.991208	0.99365	0.993169	1.12076	1.07298	1.13625	1.15301	1.19311	1.28358	1.32482	1.36118	1.25462	1.42399	1.49035	1.26921	1.24395	1.29649	1.31607	1.74048	1.73666	1.70703	1.48539	1.49072			555.8	0.957049	0.923136	0.963224	0.940924	0.943335	0.940813	0.965785	0.947259	1.08874	1.05894	1.13633	1.04857	1.4656	1.16486	1.2005	1.06523	0.90647	1.16782	1.0895	1.09974	1.4341
556	0.989646	0.991248	0.990732	0.993136	0.992698	1.11952	1.07184	1.13532	1.15178	1.1922	1.28186	1.32299	1.35946	1.25321	1.42219	1.48813	1.26748	1.2423	1.29512	1.31456	1.7373	1.734	1.70441	1.48363	1.48911			556	0.955504	0.921276	0.96171	0.939156	0.941673	0.939442	0.963918	0.945487	1.08636	1.0565	1.13439	1.04612	1.46236	1.16222	1.19778	1.06325	0.904216	1.16535	1.08738	1.09715	1.43125
556.2	0.988967	0.990615	0.990016	0.992105	0.991864	1.11831	1.07048	1.13403	1.15022	1.19058	1.27945	1.32096	1.35729	1.25148	1.4203	1.48542	1.26555	1.24023	1.29342	1.31275	1.73358	1.73067	1.70118	1.48142	1.48697			556.2	0.953657	0.918687	0.959661	0.937025	0.93955	0.937764	0.961468	0.943393	1.08351	1.05338	1.13178	1.04312	1.45787	1.15906	1.19425	1.0608	0.901651	1.16253	1.08486	1.09401	1.42769
556.4	0.988543	0.989815	0.989278	0.991456	0.991093	1.11729	1.06928	1.13289	1.14893	1.1891	1.27719	1.31928	1.35558	1.24994	1.41892	1.48327	1.26416	1.2385	1.29161	1.31105	1.73038	1.72779	1.69876	1.47979	1.48475			556.4	0.952131	0.91695	0.958659	0.935594	0.938066	0.936272	0.959718	0.941734	1.08141	1.05073	1.12961	1.04086	1.45432	1.15685	1.19138	1.05883	0.899566	1.15975	1.08279	1.09156	1.42472
556.6	0.987703	0.988936	0.98844	0.990677	0.990172	1.11572	1.06754	1.13157	1.14736	1.18735	1.27454	1.31691	1.35309	1.24816	1.4171	1.48006	1.26234	1.23668	1.28955	1.30877	1.727	1.72442	1.69541	1.47753	1.48212			556.6	0.950252	0.914595	0.957097	0.933635	0.935975	0.934564	0.957402	0.939562	1.0787	1.04754	1.12684	1.03791	1.44955	1.15415	1.1881	1.0565	0.897279	1.15634	1.08012	1.08835	1.42077
556.8	0.986847	0.988063	0.98748	0.989976	0.989484	1.11401	1.06677	1.13027	1.14559	1.18601	1.2729	1.31515	1.351	1.24657	1.41551	1.47783	1.26036	1.23494	1.28789	1.30704	1.72404	1.72171	1.69275	1.47548	1.48012			556.8	0.948658	0.912393	0.955785	0.932003	0.934164	0.932997	0.955594	0.937649	1.07635	1.04491	1.12476	1.03545	1.44595	1.1515	1.18547	1.05447	0.895097	1.15366	1.07759	1.08597	1.41779
557	0.985626	0.986746	0.98635	0.989067	0.988582	1.11265	1.06548	1.12857	1.14388	1.18453	1.27078	1.31287	1.34879	1.24472	1.41327	1.47515	1.25773	1.23258	1.28592	1.30533	1.72026	1.71809	1.68944	1.47325	1.47773			557	0.946619	0.909391	0.953557	0.930135	0.93204	0.931099	0.953444	0.935131	1.07352	1.04181	1.12211	1.03234	1.44179	1.14831	1.18223	1.05189	0.892449	1.15053	1.0748	1.08274	1.41411
557.2	0.984146	0.985127	0.985036	0.988035	0.986727	1.11054	1.06326	1.12636	1.14159	1.18241	1.26826	1.31073	1.34621	1.24191	1.4105	1.47141	1.25452	1.23012	1.28333	1.30303	1.71548	1.71348	1.68478	1.46951	1.47381			557.2	0.944173	0.906007	0.951032	0.927266	0.929382	0.92852	0.951249	0.932364	1.07012	1.03801	1.11873	1.02835	1.43638	1.14483	1.17813	1.04839	0.888873	1.14691	1.07157	1.07876	1.40905
557.4	0.983897	0.984701	0.984759	0.987722	0.985806	1.10963	1.06212	1.12515	1.14087	1.18134	1.26664	1.3097	1.34458	1.24058	1.40912	1.46985	1.25317	1.22886	1.28216	1.30179	1.7126	1.71121	1.68286	1.46827	1.47222			557.4	0.942951	0.904487	0.949502	0.926084	0.928163	0.927238	0.949885	0.931313	1.06838	1.03599	1.11701	1.02654	1.43398	1.14292	1.17584	1.04672	0.887207	1.1452	1.07011	1.07684	1.40676
557.6	0.982359	0.983217	0.983683	0.986837	0.984003	1.10774	1.05995	1.12384	1.13883	1.17872	1.26422	1.3062	1.3416	1.23795	1.40575	1.46617	1.24966	1.2267	1.28051	1.29941	1.70734	1.70776	1.67865	1.46538	1.46937			557.6	0.94018	0.901046	0.946699	0.923438	0.925422	0.924694	0.946741	0.928832	1.06458	1.03205	1.1135	1.02304	1.428	1.13898	1.17166	1.04346	0.883571	1.14111	1.06644	1.07283	1.40213
557.8	0.981294	0.982028	0.982787	0.986285	0.983084	1.10663	1.05857	1.12287	1.13756	1.17753	1.26259	1.30437	1.33953	1.23624	1.40404	1.46395	1.24773	1.22501	1.27893	1.29767	1.70423	1.70485	1.67542	1.46312	1.46722			557.8	0.938494	0.898758	0.945399	0.921734	0.923278	0.923042	0.944693	0.927163	1.06214	1.02942	1.11107	1.02022	1.42454	1.13628	1.16875	1.04136	0.881339	1.1384	1.06413	1.07015	1.39911
558	0.980204	0.980996	0.981427	0.985112	0.98192	1.105	1.05648	1.12183	1.13564	1.17579	1.26036	1.30218	1.33682	1.23397	1.40154	1.46101	1.2455	1.22291	1.27712	1.29534	1.7006	1.7009	1.67165	1.46019	1.46463			558	0.936404	0.895881	0.943261	0.919704	0.920831	0.921072	0.94215	0.92495	1.05877	1.02627	1.10834	1.0169	1.41986	1.13314	1.16515	1.03888	0.878764	1.13489	1.06114	1.067	1.39506
558.2	0.979054	0.979458	0.980366	0.984364	0.981045	1.10354	1.05509	1.1204	1.13393	1.17428	1.25823	1.30037	1.3342	1.23249	1.39936	1.4582	1.24344	1.22133	1.27565	1.29351	1.6972	1.69752	1.66889	1.45782	1.46251			558.2	0.934664	0.893487	0.941811	0.917688	0.918845	0.919507	0.940024	0.922697	1.05609	1.02354	1.10584	1.01456	1.41656	1.13026	1.16214	1.03653	0.876653	1.13204	1.05889	1.06434	1.39158
558.4	0.977294	0.977825	0.978739	0.983198	0.979793	1.10187	1.05327	1.11849	1.13186	1.1721	1.25526	1.2978	1.3311	1.23036	1.39674	1.45508	1.2408	1.21944	1.27357	1.29108	1.69297	1.69347	1.66528	1.4551	1.45936			558.4	0.932517	0.890418	0.939892	0.91504	0.916537	0.917396	0.937528	0.920238	1.05269	1.02011	1.10284	1.01162	1.41222	1.12681	1.15805	1.03364	0.874087	1.1285	1.05592	1.06094	1.38729
558.6	0.976366	0.976535	0.977799	0.982294	0.978962	1.10001	1.05202	1.11704	1.13032	1.17026	1.25293	1.2957	1.32894	1.22859	1.39468	1.45227	1.23872	1.21748	1.27192	1.28936	1.69009	1.69064	1.66193	1.45247	1.45682			558.6	0.930844	0.88822	0.937911	0.913286	0.914536	0.915646	0.935545	0.918083	1.05023	1.01757	1.10075	1.00897	1.40832	1.12426	1.15503	1.03132	0.871845	1.12599	1.05362	1.05815	1.38385
558.8	0.975207	0.975447	0.976452	0.980994	0.977823	1.09832	1.05033	1.1149	1.12854	1.16799	1.2506	1.29308	1.32593	1.22631	1.39196	1.44897	1.2364	1.21493	1.27006	1.2872	1.68551	1.68652	1.65836	1.44994	1.45384			558.8	0.928663	0.885546	0.935525	0.910892	0.912152	0.913353	0.933167	0.915513	1.04692	1.01406	1.09798	1.0059	1.40376	1.12089	1.15128	1.02849	0.868909	1.12259	1.05032	1.05479	1.37972
559	0.974374	0.97456	0.975292	0.979913	0.976911	1.09668	1.04893	1.11357	1.12717	1.16617	1.24806	1.29088	1.32394	1.22433	1.38999	1.44633	1.23425	1.21252	1.26827	1.28511	1.68187	1.68303	1.6553	1.44731	1.45141			559	0.926525	0.883269	0.933609	0.908851	0.910023	0.911632	0.930924	0.913792	1.04433	1.01119	1.09544	1.00309	1.40026	1.11824	1.1482	1.02635	0.86653	1.12009	1.04794	1.05192	1.3764
559.2	0.973258	0.973257	0.973804	0.978395	0.97557	1.0948	1.047	1.11194	1.12526	1.16395	1.24511	1.28772	1.32088	1.2224	1.38704	1.44286	1.23195	1.20944	1.26602	1.28225	1.67749	1.67877	1.65131	1.44399	1.44876			559.2	0.924057	0.8804	0.931354	0.906609	0.907611	0.909588	0.928107	0.911539	1.04148	1.00772	1.09236	0.999573	1.39539	1.11478	1.14437	1.02359	0.863418	1.11632	1.04498	1.04857	1.37226
559.4	0.970853	0.97193	0.972356	0.976738	0.97407	1.09236	1.04434	1.10987	1.12286	1.16105	1.24161	1.28474	1.31771	1.22022	1.38383	1.43889	1.22849	1.20647	1.26331	1.27944	1.67271	1.67354	1.64631	1.44028	1.4454			559.4	0.921383	0.877055	0.928896	0.903988	0.904651	0.906876	0.925206	0.908515	1.03792	1.00352	1.0887	0.995547	1.38902	1.1108	1.13974	1.02017	0.859835	1.11153	1.0412	1.04444	1.36709
559.6	0.970188	0.970711	0.971667	0.976189	0.973365	1.09075	1.04345	1.10871	1.12163	1.1596	1.23998	1.28257	1.31616	1.21873	1.38241	1.43701	1.22663	1.20492	1.26196	1.27806	1.66998	1.67079	1.64448	1.43833	1.44321			559.6	0.919981	0.875274	0.927405	0.902584	0.903123	0.905484	0.923712	0.906999	1.03605	1.00135	1.08674	0.993491	1.38606	1.10884	1.13747	1.01831	0.857912	1.1092	1.03927	1.04217	1.36462
559.8	0.968425	0.968617	0.970144	0.974731	0.971761	1.08796	1.04078	1.10575	1.119	1.15708	1.23713	1.2794	1.31277	1.21565	1.37875	1.43323	1.22378	1.20095	1.25951	1.27521	1.66365	1.66551	1.63966	1.43419	1.43991			559.8	0.917057	0.871671	0.924338	0.899578	0.899716	0.902729	0.921029	0.904083	1.0321	0.997382	1.08311	0.9896	1.38042	1.1046	1.13296	1.01465	0.854486	1.10497	1.03564	1.03745	1.35927
560	0.966812	0.966963	0.968817	0.973453	0.97073	1.08659	1.03919	1.10395	1.11752	1.15483	1.23519	1.27663	1.31079	1.21336	1.37606	1.43053	1.22135	1.19882	1.25747	1.27303	1.6594	1.66177	1.63661	1.43161	1.43791			560	0.915091	0.869238	0.922153	0.897604	0.897767	0.900782	0.918908	0.901925	1.02946	0.99461	1.08064	0.98717	1.3766	1.10161	1.12957	1.01235	0.851945	1.10214	1.03347	1.03445	1.35607
560.2	0.964778	0.965232	0.967395	0.971871	0.969193	1.08465	1.03705	1.10194	1.11585	1.15247	1.23209	1.27322	1.30751	1.21132	1.37262	1.42704	1.2184	1.19619	1.25493	1.27024	1.65468	1.65725	1.63241	1.428	1.4351			560.2	0.912716	0.866371	0.919476	0.895145	0.89525	0.898347	0.916296	0.899589	1.02619	0.991277	1.07737	0.983937	1.37173	1.09784	1.12542	1.00945	0.848871	1.09817	1.03049	1.03084	1.35183
560.4	0.963579	0.964181	0.965952	0.971031	0.968214	1.08239	1.03566	1.10024	1.11417	1.15047	1.22992	1.27086	1.3047	1.20951	1.37032	1.4242	1.21593	1.19375	1.25324	1.26814	1.6512	1.65396	1.6295	1.42565	1.43271			560.4	0.910727	0.86413	0.917601	0.893005	0.893216	0.896242	0.914095	0.897561	1.02365	0.988341	1.0747	0.9813	1.36723	1.09482	1.12209	1.00695	0.846566	1.09521	1.02775	1.02787	1.3484
560.6	0.96187	0.962644	0.964015	0.969636	0.96702	1.07965	1.0341	1.0986	1.11168	1.14794	1.22697	1.26784	1.30151	1.20734	1.36733	1.42096	1.21348	1.19043	1.25051	1.26557	1.64656	1.64971	1.62586	1.42317	1.42959			560.6	0.908385	0.861448	0.915102	0.890675	0.89061	0.893849	0.911156	0.895196	1.02022	0.984683	1.07143	0.97782	1.36223	1.09109	1.11798	1.004	0.843882	1.09169	1.02443	1.02412	1.34438
560.8	0.960281	0.961351	0.962718	0.968205	0.965794	1.07832	1.03297	1.09699	1.10964	1.146	1.22471	1.26486	1.29932	1.20527	1.36475	1.41823	1.21143	1.18808	1.24808	1.2632	1.64316	1.64635	1.6224	1.42021	1.42674			560.8	0.906444	0.859028	0.913169	0.8886	0.888207	0.892058	0.909055	0.892691	1.01741	0.981799	1.0689	0.975043	1.35839	1.08789	1.11479	1.00157	0.841713	1.08884	1.02175	1.02111	1.34078
561	0.958529	0.959968	0.960781	0.966385	0.964361	1.07608	1.03097	1.09488	1.1072	1.14336	1.22221	1.26182	1.29628	1.20273	1.36149	1.41426	1.20911	1.18453	1.24517	1.26003	1.6381	1.64191	1.61788	1.41685	1.42317			561	0.904033	0.856075	0.910668	0.885854	0.885304	0.889726	0.906458	0.889502	1.01408	0.978135	1.06555	0.97143	1.35395	1.08418	1.11081	0.9986	0.838897	1.08483	1.0185	1.0175	1.33625
561.2	0.957193	0.958745	0.959487	0.964986	0.96295	1.07371	1.02911	1.0929	1.1051	1.14112	1.21964	1.25926	1.29311	1.20082	1.35898	1.41113	1.20673	1.18203	1.24295	1.25764	1.63422	1.63822	1.61424	1.41433	1.42059			561.2	0.902034	0.853685	0.90835	0.883559	0.883194	0.887598	0.904332	0.887311	1.01143	0.975085	1.06285	0.968867	1.34996	1.08138	1.10744	0.996084	0.836578	1.08184	1.01591	1.01442	1.33261
561.4	0.95536	0.956806	0.957794	0.963118	0.961367	1.07105	1.02712	1.09069	1.10281	1.13876	1.21623	1.256	1.29002	1.19802	1.3558	1.40722	1.20373	1.17872	1.24053	1.25467	1.62967	1.63369	1.60964	1.41124	1.41727			561.4	0.89963	0.850817	0.905816	0.880699	0.88046	0.884912	0.901632	0.884539	1.00801	0.971368	1.05942	0.965465	1.34499	1.07779	1.1031	0.992803	0.833473	1.07835	1.0127	1.01046	1.32813
561.6	0.953747	0.955198	0.955416	0.961028	0.959767	1.0685	1.02427	1.08816	1.10059	1.13591	1.21221	1.25203	1.28638	1.19455	1.35189	1.40316	1.19999	1.17464	1.2369	1.25131	1.62343	1.62786	1.60379	1.40723	1.41277			561.6	0.896516	0.847277	0.902431	0.87749	0.877244	0.881899	0.89829	0.881295	1.00403	0.96696	1.05548	0.960992	1.33887	1.07368	1.09802	0.989145	0.82977	1.07395	1.00841	1.00594	1.32315
561.8	0.952132	0.954179	0.95393	0.959672	0.958153	1.06689	1.02292	1.0864	1.09856	1.13406	1.21015	1.24939	1.28429	1.19223	1.34926	1.39996	1.19761	1.17199	1.23481	1.24919	1.61916	1.62418	1.6003	1.40453	1.4098			561.8	0.894361	0.845034	0.900332	0.875355	0.875037	0.879941	0.895951	0.87902	1.00141	0.96388	1.05265	0.957829	1.33466	1.07076	1.09477	0.98665	0.827428	1.07089	1.00556	1.00302	1.3197
562	0.950326	0.952495	0.952172	0.95795	0.956553	1.06481	1.02081	1.08363	1.09566	1.1315	1.20701	1.24588	1.2811	1.18935	1.34628	1.39597	1.19431	1.16858	1.23197	1.24628	1.61427	1.61972	1.59574	1.40105	1.40662			562	0.891691	0.842187	0.897713	0.87256	0.872223	0.87747	0.893032	0.876624	0.997848	0.960039	1.04904	0.954088	1.32938	1.06704	1.09065	0.983492	0.824778	1.06729	1.00225	0.999317	1.31539
562.2	0.948823	0.950861	0.950814	0.956563	0.955318	1.06283	1.0189	1.08207	1.09362	1.12905	1.20449	1.24312	1.27861	1.18686	1.34343	1.39276	1.19185	1.1662	1.22938	1.24377	1.61041	1.61599	1.59214	1.39821	1.40368			562.2	0.889733	0.839863	0.895403	0.870254	0.870032	0.875355	0.890556	0.874385	0.995162	0.957133	1.04611	0.950803	1.32532	1.06378	1.08725	0.980823	0.822416	1.06397	0.999658	0.996279	1.31166
562.4	0.94674	0.94931	0.948997	0.954896	0.953437	1.06016	1.01651	1.07962	1.09104	1.12623	1.20147	1.2401	1.27506	1.18402	1.34027	1.38868	1.18881	1.16362	1.22639	1.24065	1.60507	1.61125	1.58711	1.39499	1.3999			562.4	0.887469	0.836762	0.893006	0.86759	0.867456	0.872518	0.887464	0.87152	0.991869	0.953514	1.04243	0.946581	1.32018	1.06009	1.08308	0.977404	0.819512	1.05954	0.996511	0.992459	1.30686
562.6	0.945219	0.947739	0.947381	0.95376	0.952045	1.05828	1.01447	1.07775	1.08913	1.12438	1.19919	1.23741	1.2719	1.18165	1.33756	1.38525	1.18649	1.1618	1.2241	1.23827	1.60116	1.60724	1.58368	1.39279	1.39677			562.6	0.885445	0.834467	0.890768	0.865144	0.865077	0.870295	0.884974	0.869489	0.989062	0.950513	1.03938	0.943748	1.31664	1.05711	1.07968	0.974673	0.817111	1.05637	0.993722	0.989129	1.30301
562.8	0.943418	0.945624	0.944928	0.951823	0.950225	1.05554	1.01207	1.07544	1.0862	1.12187	1.19589	1.23408	1.26807	1.17884	1.33436	1.38047	1.18337	1.15844	1.2211	1.23496	1.59617	1.60273	1.57925	1.38944	1.39319			562.8	0.882708	0.831493	0.887785	0.862037	0.86227	0.867518	0.881606	0.866707	0.985804	0.946832	1.0357	0.940298	1.31175	1.05326	1.07547	0.971408	0.814138	1.05247	0.990427	0.985013	1.2984
563	0.941879	0.944086	0.943148	0.950159	0.948628	1.05375	1.00988	1.07373	1.08395	1.11964	1.19321	1.23187	1.26488	1.17667	1.33133	1.37719	1.18062	1.15599	1.21863	1.23224	1.59224	1.59877	1.57523	1.3868	1.39047			563	0.880533	0.82926	0.885734	0.859746	0.86009	0.865436	0.878865	0.864509	0.982901	0.943805	1.03272	0.937377	1.3077	1.05031	1.07199	0.968795	0.811655	1.0493	0.987904	0.981994	1.29474
563.2	0.939949	0.941849	0.940988	0.948331	0.946721	1.05147	1.00717	1.07172	1.08105	1.11678	1.18955	1.2283	1.26113	1.1738	1.32767	1.3726	1.17679	1.15325	1.21543	1.22888	1.58784	1.59379	1.57044	1.38337	1.38682			563.2	0.877892	0.826501	0.882611	0.856719	0.857241	0.862678	0.875442	0.861449	0.97944	0.940077	1.02907	0.933457	1.30263	1.0464	1.06762	0.965457	0.808718	1.04573	0.98435	0.978164	1.29004
563.4	0.938208	0.939795	0.938998	0.946057	0.94412	1.04832	1.00442	1.0682	1.07809	1.11368	1.18544	1.2249	1.25674	1.17033	1.32352	1.36825	1.17309	1.14909	1.21174	1.22521	1.58254	1.58819	1.56499	1.37941	1.38196			563.4	0.874816	0.823356	0.878974	0.852846	0.8537	0.859282	0.871279	0.858223	0.975039	0.935325	1.02457	0.928579	1.29639	1.04208	1.06259	0.961277	0.805097	1.04109	0.980089	0.973851	1.28416
563.6	0.936715	0.938146	0.937111	0.944184	0.942637	1.04654	1.00243	1.06608	1.07577	1.11125	1.18254	1.22225	1.25438	1.16749	1.32112	1.36441	1.17059	1.14663	1.20958	1.22274	1.57817	1.58434	1.56148	1.3764	1.37857			563.6	0.872612	0.82105	0.876702	0.850633	0.851296	0.857151	0.86853	0.855981	0.972317	0.932076	1.02165	0.925507	1.29234	1.03936	1.05925	0.958438	0.802503	1.03804	0.9772	0.970514	1.2806
563.8	0.935145	0.936334	0.935162	0.942172	0.940735	1.04402	0.999938	1.06352	1.07269	1.10841	1.17914	1.21878	1.25124	1.16438	1.31794	1.36043	1.16749	1.14381	1.2068	1.21935	1.57288	1.57915	1.55654	1.37249	1.37479			563.8	0.870051	0.818032	0.873684	0.847828	0.84827	0.854621	0.864878	0.852958	0.968668	0.928262	1.01778	0.921771	1.28759	1.0357	1.05505	0.954869	0.799393	1.03386	0.973287	0.966491	1.2759
564	0.933461	0.934539	0.933517	0.940874	0.939083	1.04138	0.997717	1.06123	1.07062	1.10626	1.17683	1.21609	1.24852	1.16167	1.31538	1.35688	1.16456	1.14136	1.20447	1.21653	1.56906	1.57487	1.55256	1.36949	1.37169			564	0.867907	0.815537	0.871361	0.845424	0.845936	0.852416	0.861987	0.850502	0.965807	0.925339	1.01494	0.918996	1.28341	1.03273	1.05178	0.952029	0.796868	1.03081	0.970544	0.963396	1.27192
564.2	0.931563	0.932488	0.930896	0.939186	0.937096	1.03813	0.995298	1.05865	1.06807	1.1035	1.17337	1.21255	1.24473	1.15871	1.31219	1.35241	1.16092	1.13819	1.20166	1.2134	1.56415	1.56914	1.54734	1.36579	1.36831			564.2	0.865271	0.812679	0.868395	0.84252	0.843239	0.849559	0.858394	0.847699	0.962233	0.92141	1.01109	0.915253	1.27845	1.02927	1.04758	0.948629	0.793397	1.02659	0.967096	0.959352	1.267
564.4	0.930181	0.930825	0.929404	0.93749	0.935561	1.03598	0.993608	1.05671	1.06612	1.10112	1.17071	1.20971	1.24198	1.15613	1.30945	1.34902	1.15812	1.13558	1.19904	1.2109	1.56029	1.56496	1.54366	1.36297	1.36534			564.4	0.863099	0.810195	0.865828	0.840305	0.840915	0.84733	0.855403	0.845497	0.959326	0.918443	1.00792	0.912172	1.27425	1.02628	1.04411	0.945997	0.790962	1.02352	0.964361	0.956076	1.26311
564.6	0.928195	0.928809	0.927662	0.935536	0.933726	1.0338	0.991114	1.05428	1.06331	1.09802	1.16704	1.2059	1.23858	1.15313	1.30559	1.34458	1.15452	1.13202	1.19582	1.20769	1.55536	1.56018	1.53905	1.35941	1.36146			564.6	0.860398	0.807277	0.862808	0.837504	0.837967	0.844381	0.851758	0.8426	0.955631	0.914726	1.00419	0.90826	1.26886	1.02241	1.03985	0.942403	0.787681	1.01982	0.960878	0.952327	1.25841
564.8	0.926347	0.926938	0.926156	0.933993	0.932116	1.03103	0.989063	1.05192	1.06089	1.09563	1.16416	1.20291	1.23576	1.15082	1.30317	1.34109	1.15187	1.12948	1.19327	1.20514	1.55089	1.55608	1.535	1.35669	1.35847			564.8	0.858194	0.805181	0.86038	0.835092	0.835539	0.842065	0.848729	0.840275	0.952901	0.911549	1.00112	0.905322	1.26439	1.01938	1.03651	0.939693	0.785348	1.01669	0.957872	0.949131	1.25447
565	0.923436	0.924927	0.924452	0.931641	0.92988	1.02775	0.986356	1.04893	1.05811	1.09259	1.16074	1.19946	1.23197	1.14779	1.29977	1.33693	1.1484	1.12577	1.19001	1.20168	1.54581	1.55081	1.53046	1.35325	1.35486			565	0.855208	0.802577	0.857558	0.832148	0.832653	0.83918	0.844861	0.837397	0.949419	0.907777	0.997405	0.901619	1.25898	1.01564	1.0325	0.936132	0.782359	1.01281	0.954446	0.945021	1.24956
565.2	0.922012	0.923006	0.922414	0.929826	0.92853	1.02505	0.983943	1.04672	1.05577	1.09019	1.15742	1.19621	1.22867	1.14548	1.29682	1.33337	1.14552	1.12257	1.18751	1.19902	1.54158	1.54687	1.52686	1.35054	1.35202			565.2	0.852905	0.800468	0.855252	0.829884	0.830214	0.836938	0.841941	0.835254	0.946551	0.904745	0.99432	0.898496	1.25518	1.01241	1.02902	0.933461	0.779679	1.00954	0.951832	0.941645	1.24552
565.4	0.919875	0.920399	0.920029	0.927715	0.92651	1.02201	0.981243	1.04402	1.05306	1.08736	1.15372	1.19266	1.2246	1.14243	1.29275	1.32908	1.14206	1.11917	1.18408	1.19555	1.53581	1.54163	1.52262	1.34728	1.3479			565.4	0.850105	0.797664	0.852153	0.827072	0.827229	0.833981	0.838278	0.832012	0.942868	0.901	0.990572	0.894655	1.25065	1.00826	1.02476	0.930055	0.776333	1.00538	0.948338	0.937624	1.24065
565.6	0.9178	0.917564	0.917614	0.925125	0.923891	1.01887	0.978111	1.04027	1.04951	1.08379	1.14878	1.18797	1.21985	1.13902	1.28851	1.32438	1.13817	1.11482	1.18042	1.19131	1.52957	1.53541	1.51617	1.34291	1.34354			565.6	0.84701	0.794601	0.848081	0.823574	0.823626	0.83051	0.834067	0.828251	0.938507	0.896156	0.985934	0.890362	1.24448	1.00379	1.01964	0.926008	0.772512	1.00081	0.944584	0.932682	1.23497
565.8	0.916395	0.915581	0.916046	0.923242	0.922325	1.01664	0.976083	1.03752	1.04682	1.08132	1.14582	1.18481	1.21731	1.13593	1.28546	1.32091	1.13501	1.11196	1.17772	1.18873	1.52513	1.53145	1.51214	1.33991	1.34032			565.8	0.844762	0.79268	0.845249	0.821069	0.821222	0.828359	0.831512	0.825719	0.935512	0.893129	0.982691	0.887568	1.24059	1.00088	1.01614	0.923161	0.770419	0.997453	0.941736	0.929581	1.23127
566	0.914361	0.913441	0.914149	0.920947	0.920347	1.01322	0.973605	1.03445	1.04362	1.07812	1.14235	1.18126	1.21401	1.13229	1.28168	1.31696	1.13108	1.10814	1.1741	1.18548	1.51958	1.5266	1.50673	1.33597	1.33633			566	0.841973	0.790105	0.841839	0.817983	0.818228	0.825669	0.828078	0.82279	0.931892	0.889323	0.978629	0.883855	1.23568	0.997462	1.01176	0.919707	0.767561	0.993309	0.938065	0.92572	1.22659
566.2	0.912321	0.911631	0.912715	0.91931	0.918618	1.01094	0.971765	1.032	1.04153	1.07552	1.13931	1.17829	1.21122	1.1296	1.27885	1.31371	1.12837	1.1058	1.17179	1.18299	1.51531	1.52215	1.50238	1.33291	1.33293			566.2	0.839793	0.788218	0.839372	0.815768	0.815749	0.823265	0.825278	0.820308	0.929021	0.886415	0.975733	0.880394	1.23131	0.994615	1.00839	0.916826	0.765155	0.990317	0.93507	0.92268	1.22269
566.4	0.90986	0.909237	0.910706	0.917102	0.916232	1.00826	0.969436	1.02937	1.03899	1.07222	1.13538	1.17418	1.20764	1.12624	1.27538	1.30981	1.12524	1.1024	1.16856	1.17948	1.51014	1.51644	1.49746	1.32922	1.32826			566.4	0.836913	0.785799	0.835819	0.812787	0.812661	0.820229	0.821738	0.817139	0.925176	0.88281	0.972067	0.876396	1.2263	0.990958	1.00418	0.913328	0.76192	0.986241	0.931277	0.918758	1.21776
566.6	0.908258	0.907531	0.909022	0.91526	0.914588	1.006	0.967426	1.0272	1.03693	1.06974	1.13284	1.17114	1.20452	1.12375	1.27271	1.30603	1.12229	1.0996	1.16613	1.17683	1.50612	1.51225	1.4934	1.32633	1.32527			566.6	0.83472	0.783808	0.833221	0.810357	0.810308	0.818116	0.819033	0.814969	0.922173	0.879782	0.968977	0.873369	1.22194	0.987903	1.00073	0.910548	0.759118	0.982892	0.928235	0.915561	1.21382
566.8	0.90562	0.905134	0.906524	0.912835	0.912625	1.00335	0.964462	1.02433	1.0338	1.06672	1.12919	1.16744	1.20067	1.12074	1.2695	1.30132	1.11849	1.09614	1.16274	1.17335	1.50064	1.50689	1.48812	1.32252	1.32113			566.8	0.831882	0.781154	0.830133	0.807545	0.807277	0.8153	0.815468	0.811839	0.918468	0.875966	0.965089	0.869879	1.21687	0.983961	0.996364	0.907139	0.755801	0.978839	0.924533	0.911672	1.20912
567	0.903906	0.903356	0.904618	0.910999	0.910956	1.00091	0.962205	1.02174	1.0317	1.06433	1.12636	1.16431	1.19724	1.11826	1.26602	1.29803	1.11553	1.09296	1.1599	1.17051	1.49626	1.5027	1.4832	1.31973	1.31809			567	0.829575	0.779226	0.827446	0.805153	0.804801	0.812849	0.812782	0.80939	0.915531	0.873037	0.961933	0.866977	1.21294	0.980973	0.992989	0.904398	0.753216	0.975449	0.921822	0.908605	1.20494
567.2	0.901362	0.900873	0.902289	0.908639	0.908696	0.99788	0.959186	1.01868	1.02905	1.06085	1.12278	1.16061	1.19318	1.11511	1.2615	1.29369	1.11159	1.08865	1.15616	1.16693	1.49047	1.49762	1.4778	1.31643	1.31413			567.2	0.826773	0.776849	0.824253	0.801923	0.801702	0.809949	0.809268	0.806468	0.911844	0.869141	0.957997	0.863051	1.20798	0.977284	0.988619	0.901295	0.74989	0.971511	0.918656	0.904791	1.19989
567.4	0.898682	0.898018	0.899342	0.905508	0.906226	0.9953	0.956173	1.01489	1.02545	1.05689	1.11796	1.15594	1.18807	1.11127	1.25675	1.28841	1.10731	1.08429	1.15211	1.16294	1.48345	1.4913	1.47198	1.31178	1.30924			567.4	0.823275	0.774678	0.819831	0.798216	0.797962	0.806378	0.804884	0.802537	0.907543	0.864476	0.953196	0.858128	1.20207	0.972916	0.983088	0.89734	0.745882	0.966288	0.914103	0.900051	1.19385
567.6	0.896601	0.895764	0.897656	0.903828	0.904604	0.99286	0.953986	1.01185	1.02277	1.05427	1.11484	1.15328	1.18482	1.10856	1.25387	1.28483	1.10412	1.08129	1.14924	1.16004	1.47904	1.48703	1.46802	1.30891	1.30581			567.6	0.820919	0.773036	0.817392	0.79577	0.795549	0.803938	0.802008	0.800064	0.904661	0.861415	0.950164	0.855149	1.19772	0.969933	0.979657	0.894481	0.743444	0.963219	0.911081	0.897129	1.18989
567.8	0.893932	0.893209	0.895302	0.901614	0.902658	0.990219	0.951128	1.00891	1.01933	1.051	1.11084	1.14912	1.1807	1.10531	1.25028	1.28076	1.10023	1.07753	1.14592	1.15642	1.47319	1.48158	1.46284	1.30499	1.30171			567.8	0.818025	0.770927	0.814494	0.792767	0.792438	0.801004	0.798682	0.796925	0.900951	0.857583	0.9463	0.851335	1.19281	0.965896	0.975396	0.89088	0.740083	0.959348	0.90732	0.89337	1.18491
568	0.892	0.891449	0.893208	0.899722	0.90072	0.987979	0.948672	1.00629	1.01701	1.04854	1.1079	1.14639	1.1777	1.10225	1.24709	1.27722	1.09718	1.07482	1.14311	1.15337	1.46928	1.47707	1.45908	1.30175	1.29815			568	0.815735	0.768835	0.811844	0.790252	0.790139	0.798717	0.795945	0.794369	0.897942	0.854577	0.943172	0.848174	1.18885	0.96276	0.972176	0.888107	0.737356	0.956018	0.904444	0.890251	1.18082
568.2	0.889693	0.889063	0.890758	0.897598	0.898229	0.984954	0.945485	1.00273	1.01384	1.04535	1.10484	1.14253	1.17325	1.09849	1.24294	1.27246	1.09349	1.07133	1.13967	1.14966	1.46412	1.47191	1.45396	1.29761	1.29387			568.2	0.812875	0.766125	0.808413	0.787358	0.787167	0.795851	0.79266	0.791154	0.894073	0.851034	0.939413	0.844231	1.18408	0.958978	0.968038	0.884543	0.734155	0.951765	0.901105	0.886346	1.17593
568.4	0.888053	0.88706	0.889111	0.896037	0.896306	0.982323	0.943407	1.00026	1.01141	1.04272	1.10174	1.13976	1.17012	1.09543	1.23995	1.26895	1.09056	1.06892	1.1366	1.14684	1.45972	1.46767	1.44979	1.29423	1.29049			568.4	0.810627	0.764079	0.805223	0.784951	0.784808	0.7936	0.789949	0.788487	0.890845	0.848004	0.936298	0.841065	1.17956	0.955853	0.964481	0.881734	0.73116	0.948632	0.898073	0.883357	1.17214
568.6	0.885577	0.884521	0.886831	0.893582	0.89409	0.979251	0.940667	0.99732	1.00819	1.03943	1.09825	1.1363	1.16599	1.09168	1.23615	1.26455	1.08722	1.06592	1.13301	1.14312	1.45443	1.4623	1.4444	1.29013	1.28606			568.6	0.807675	0.76136	0.801402	0.781885	0.78177	0.790683	0.786609	0.785317	0.887007	0.844344	0.932536	0.83718	1.17397	0.952072	0.9603	0.878083	0.727545	0.944789	0.89447	0.879429	1.16734
568.8	0.883527	0.882887	0.884853	0.891517	0.892222	0.976534	0.938264	0.995115	1.00566	1.03678	1.09578	1.13314	1.16309	1.08898	1.23296	1.26071	1.08432	1.06279	1.13022	1.14046	1.45028	1.45811	1.43995	1.28695	1.28258			568.8	0.80524	0.759113	0.79897	0.779448	0.779318	0.788242	0.78394	0.782931	0.884071	0.841417	0.929525	0.834165	1.16963	0.949005	0.956921	0.875136	0.724612	0.941551	0.891295	0.876433	1.16319
569	0.880861	0.880801	0.88228	0.8889	0.88974	0.972985	0.935341	0.991882	1.00267	1.0336	1.09216	1.12922	1.15904	1.08577	1.22895	1.25582	1.08053	1.05897	1.1268	1.13703	1.44543	1.45281	1.43504	1.2827	1.27844			569	0.802065	0.756164	0.796035	0.776352	0.776152	0.785252	0.780527	0.779888	0.880347	0.837542	0.925772	0.83058	1.16413	0.945144	0.952651	0.871435	0.721001	0.937478	0.887438	0.872659	1.15791
569.2	0.877521	0.878338	0.8791	0.885897	0.886743	0.969006	0.931837	0.988433	0.999374	1.0296	1.08742	1.12449	1.15376	1.08251	1.22412	1.25019	1.07635	1.05454	1.12264	1.13227	1.43909	1.44611	1.42842	1.27768	1.27334			569.2	0.798463	0.752708	0.79229	0.772986	0.772551	0.781751	0.776183	0.776136	0.875874	0.832819	0.921298	0.825921	1.15726	0.939825	0.947973	0.867219	0.716741	0.933217	0.883126	0.868192	1.15154
569.4	0.875781	0.87632	0.877	0.884092	0.884857	0.966765	0.92952	0.985652	0.996884	1.027	1.08413	1.12118	1.15057	1.07969	1.22105	1.24636	1.07366	1.05129	1.12008	1.12915	1.43502	1.44137	1.42427	1.27421	1.26982			569.4	0.796212	0.749929	0.789719	0.770658	0.770155	0.779283	0.77321	0.773685	0.87266	0.829559	0.918165	0.823108	1.15297	0.936709	0.944468	0.864455	0.713865	0.930245	0.880276	0.865116	1.14741
569.6	0.873296	0.873873	0.874087	0.881761	0.882291	0.96412	0.926503	0.982419	0.993417	1.02372	1.08019	1.11716	1.14624	1.0761	1.21693	1.24194	1.06988	1.04766	1.11646	1.12522	1.42948	1.43589	1.41929	1.26989	1.26529			569.6	0.793397	0.746417	0.786303	0.767571	0.767125	0.776222	0.769388	0.770436	0.868722	0.825425	0.914174	0.819497	1.14749	0.93283	0.93994	0.861056	0.710254	0.926239	0.876558	0.861242	1.1425
569.8	0.87109	0.87188	0.872079	0.880115	0.880412	0.961519	0.923746	0.979747	0.99072	1.0211	1.07682	1.11409	1.14276	1.07335	1.21336	1.23813	1.0669	1.04469	1.11395	1.12247	1.42493	1.4319	1.41469	1.26659	1.26214			569.8	0.791072	0.743832	0.78376	0.765267	0.764793	0.773783	0.766368	0.767536	0.865826	0.82228	0.910851	0.816305	1.14349	0.929537	0.936702	0.858192	0.707515	0.923158	0.873845	0.858069	1.13871
570	0.868605	0.869293	0.869406	0.877764	0.877708	0.958047	0.92069	0.976342	0.987648	1.01795	1.07283	1.11018	1.13859	1.07004	1.20925	1.23379	1.06328	1.04094	1.11049	1.119	1.41968	1.42634	1.40916	1.26204	1.25784			570	0.788085	0.740463	0.780395	0.76238	0.761769	0.770629	0.762701	0.764161	0.862191	0.818566	0.906877	0.812186	1.13861	0.92533	0.932599	0.854607	0.704105	0.919148	0.870329	0.854241	1.13397
570.2	0.866463	0.867361	0.867228	0.876072	0.875521	0.955563	0.918569	0.974107	0.985124	1.01513	1.06952	1.10674	1.1354	1.0672	1.20584	1.22993	1.0603	1.03769	1.108	1.11606	1.41536	1.42228	1.4052	1.25871	1.25439			570.2	0.785696	0.737642	0.77776	0.759651	0.759373	0.768378	0.759793	0.761605	0.859252	0.815468	0.903703	0.808847	1.13452	0.921929	0.929259	0.851831	0.701651	0.915767	0.867392	0.850904	1.12997
570.4	0.863759	0.864788	0.864501	0.87369	0.872598	0.952647	0.915804	0.971068	0.981974	1.0119	1.06517	1.10266	1.13136	1.0634	1.2019	1.22531	1.05649	1.0342	1.10453	1.11252	1.40989	1.41697	1.40065	1.25433	1.24974			570.4	0.782856	0.733942	0.774543	0.756425	0.756469	0.765498	0.756021	0.758408	0.855756	0.811577	0.900017	0.804448	1.12951	0.91775	0.924973	0.848397	0.698228	0.911686	0.863683	0.847006	1.12506
570.6	0.861567	0.862969	0.862134	0.871735	0.870709	0.950042	0.913329	0.968566	0.979225	1.00953	1.06192	1.0994	1.12798	1.06038	1.19895	1.22155	1.05347	1.03121	1.10187	1.1097	1.40561	1.41261	1.39615	1.25041	1.24623			570.6	0.780403	0.730876	0.772046	0.753889	0.754078	0.763078	0.753226	0.756081	0.852781	0.808646	0.897086	0.801434	1.12514	0.914421	0.921566	0.845439	0.695502	0.908417	0.860831	0.843813	1.1211
570.8	0.858825	0.860922	0.859627	0.869199	0.868141	0.946905	0.910083	0.965255	0.975908	1.00642	1.05818	1.09533	1.12384	1.05671	1.19497	1.2167	1.04972	1.02736	1.09864	1.1058	1.40018	1.40728	1.3907	1.24556	1.24199			570.8	0.777273	0.727043	0.768867	0.750822	0.750992	0.760009	0.749967	0.753303	0.849152	0.804827	0.893279	0.797445	1.11952	0.910164	0.917503	0.84185	0.692159	0.904691	0.857312	0.84005	1.11633
571	0.856096	0.858169	0.856346	0.866104	0.865109	0.943065	0.906268	0.961217	0.972087	1.00281	1.05354	1.09019	1.11944	1.05228	1.18996	1.21104	1.04561	1.02332	1.09458	1.10074	1.39347	1.40108	1.38435	1.24025	1.23651			571	0.773685	0.722464	0.764736	0.747022	0.747266	0.756659	0.745901	0.749224	0.844704	0.800403	0.888662	0.792813	1.11328	0.905261	0.912493	0.83759	0.68802	0.899984	0.85294	0.835213	1.11037
571.2	0.854495	0.855995	0.854551	0.864634	0.863524	0.941032	0.904276	0.958793	0.970099	1.00069	1.0511	1.08817	1.1169	1.05004	1.18731	1.20841	1.04328	1.02131	1.09253	1.09838	1.38991	1.39791	1.3814	1.23732	1.23357			571.2	0.771875	0.720107	0.762714	0.745266	0.745466	0.754789	0.743581	0.747289	0.842728	0.798146	0.886484	0.790487	1.10972	0.903149	0.910002	0.835326	0.686064	0.897822	0.85071	0.832883	1.1074
571.4	0.851819	0.85337	0.8519	0.862328	0.860951	0.937835	0.901429	0.955745	0.966548	0.99705	1.0467	1.08387	1.11263	1.04672	1.18354	1.20356	1.03936	1.01749	1.08915	1.09511	1.38422	1.3921	1.37613	1.23301	1.22915			571.4	0.768814	0.716207	0.759383	0.742389	0.742281	0.75182	0.739791	0.744116	0.839315	0.794392	0.882617	0.786692	1.10443	0.899094	0.905661	0.832016	0.682291	0.894007	0.84717	0.829041	1.10235
571.6	0.84979	0.851305	0.850023	0.860157	0.858885	0.935404	0.899111	0.953467	0.96402	0.994259	1.04321	1.08036	1.10945	1.04421	1.18018	1.1997	1.03618	1.0144	1.08621	1.0922	1.37956	1.38785	1.37194	1.22936	1.2257			571.6	0.766416	0.713011	0.756699	0.739704	0.739865	0.749342	0.736696	0.741746	0.836248	0.791228	0.879526	0.783759	1.10027	0.89581	0.902232	0.829283	0.67935	0.890972	0.844136	0.825818	1.09829
571.8	0.846706	0.848211	0.846416	0.857049	0.856197	0.931848	0.895367	0.949647	0.960107	0.990031	1.03886	1.07484	1.10454	1.03982	1.17506	1.1941	1.03137	1.01016	1.08219	1.08766	1.37287	1.38103	1.3647	1.22394	1.22019			571.8	0.762816	0.708216	0.753116	0.735962	0.736025	0.745621	0.732133	0.73828	0.832329	0.786588	0.87508	0.779362	1.09507	0.891058	0.897013	0.825113	0.675377	0.886182	0.83993	0.821054	1.09227
572	0.844059	0.845775	0.843761	0.854768	0.853221	0.928866	0.89209	0.946359	0.956988	0.986558	1.03477	1.07063	1.10055	1.0362	1.17092	1.18962	1.02749	1.00627	1.07891	1.08374	1.36741	1.37503	1.35915	1.21927	1.21581			572	0.759947	0.704415	0.749915	0.732785	0.732931	0.742593	0.728444	0.735062	0.828663	0.782866	0.871087	0.775456	1.09013	0.886992	0.892678	0.821678	0.671996	0.882281	0.836253	0.817173	1.0874
572.2	0.841945	0.843668	0.841355	0.852833	0.850841	0.92641	0.88954	0.943601	0.954306	0.983916	1.031	1.06733	1.09709	1.03318	1.16777	1.1859	1.0244	1.00371	1.07643	1.08066	1.36296	1.37003	1.35465	1.21579	1.21219			572.2	0.757539	0.70145	0.747183	0.730316	0.730528	0.740263	0.725601	0.732713	0.825607	0.779857	0.868083	0.772229	1.08617	0.883934	0.889356	0.818824	0.669533	0.8791	0.833302	0.8139	1.08355
572.4	0.839362	0.840696	0.839182	0.850536	0.848355	0.92342	0.886472	0.940237	0.95099	0.980491	1.02731	1.06352	1.09295	1.02943	1.16398	1.1816	1.0205	0.999781	1.07262	1.07695	1.35714	1.36479	1.34934	1.21154	1.20787			572.4	0.754556	0.697666	0.74387	0.727348	0.727646	0.737109	0.72217	0.7298	0.821963	0.77612	0.864396	0.768301	1.08144	0.880068	0.885143	0.815311	0.666552	0.87555	0.829701	0.810101	1.07871
572.6	0.837275	0.837986	0.837091	0.848492	0.846195	0.921092	0.884059	0.937467	0.948401	0.977656	1.02411	1.06035	1.08996	1.02649	1.161	1.17795	1.01739	0.996769	1.06931	1.07394	1.35269	1.36057	1.34527	1.20793	1.20439			572.6	0.752088	0.694716	0.741011	0.724911	0.725216	0.734724	0.719337	0.727339	0.819105	0.773054	0.861469	0.765247	1.07779	0.877145	0.881638	0.812441	0.664005	0.872622	0.826885	0.806946	1.07483
572.8	0.834542	0.83536	0.834321	0.845775	0.84373	0.918022	0.88094	0.93472	0.945312	0.97439	1.02077	1.05612	1.08578	1.02325	1.15685	1.17337	1.01311	0.992937	1.06501	1.07025	1.34676	1.35531	1.34002	1.20343	1.20038			572.8	0.749037	0.691215	0.737733	0.722004	0.722099	0.731773	0.716132	0.724152	0.815522	0.769472	0.857858	0.761141	1.07326	0.873154	0.877435	0.808849	0.660694	0.868616	0.823153	0.803014	1.06998
573	0.832467	0.833259	0.832512	0.843486	0.841625	0.915372	0.878292	0.932104	0.943016	0.971608	1.01769	1.05259	1.0827	1.02029	1.15345	1.16976	1.00992	0.98977	1.06183	1.06728	1.34226	1.35094	1.33606	1.19977	1.19678			573	0.746597	0.688438	0.735332	0.719598	0.719573	0.729456	0.713451	0.721689	0.812514	0.766483	0.854991	0.758002	1.06957	0.869862	0.874161	0.80612	0.658012	0.865451	0.82001	0.799829	1.06599
573.2	0.829949	0.830784	0.830105	0.840818	0.838753	0.91237	0.875535	0.92885	0.93957	0.968421	1.01397	1.04834	1.07889	1.01641	1.14947	1.16479	1.00602	0.985385	1.05784	1.0632	1.33675	1.34515	1.33083	1.19532	1.19226			573.2	0.743673	0.684716	0.732063	0.716513	0.716477	0.726356	0.71024	0.718839	0.80891	0.762722	0.851251	0.754389	1.06447	0.866008	0.870029	0.802728	0.654888	0.861385	0.816422	0.796164	1.06105
573.4	0.827731	0.828599	0.828455	0.838784	0.836739	0.910105	0.873203	0.926001	0.936801	0.96567	1.01111	1.04525	1.07578	1.01341	1.14617	1.16088	1.00298	0.982303	1.05447	1.05998	1.33196	1.34057	1.32648	1.19193	1.18868			573.4	0.741373	0.681697	0.729626	0.714085	0.713934	0.723963	0.707436	0.716566	0.806036	0.759729	0.84815	0.751287	1.06077	0.863167	0.866717	0.800026	0.652457	0.858148	0.813533	0.793263	1.05705
573.6	0.824807	0.825351	0.825483	0.835628	0.833662	0.906323	0.869238	0.92193	0.932779	0.961568	1.00628	1.04096	1.07054	1.00892	1.1413	1.15565	0.998643	0.977978	1.04998	1.05518	1.32484	1.33334	1.3201	1.18638	1.18351			573.6	0.737914	0.677559	0.725759	0.710566	0.710257	0.720334	0.703538	0.712839	0.801535	0.755721	0.843699	0.746936	1.0554	0.858674	0.86171	0.795805	0.648286	0.853938	0.809267	0.788789	1.05113
573.8	0.822059	0.822843	0.823274	0.833345	0.831186	0.902364	0.865951	0.918586	0.929477	0.958007	1.003	1.0367	1.06696	1.00553	1.13691	1.15097	0.995022	0.974108	1.04623	1.05121	1.31911	1.32753	1.31481	1.18211	1.17907			573.8	0.734978	0.67423	0.722269	0.707603	0.707156	0.717326	0.70032	0.709498	0.797516	0.752248	0.839731	0.743634	1.05061	0.854716	0.857814	0.792236	0.645029	0.850216	0.80577	0.784825	1.04627
574	0.820142	0.820384	0.821543	0.831229	0.829182	0.899809	0.863526	0.915686	0.926944	0.955261	1.00009	1.03337	1.06374	1.00266	1.13343	1.14754	0.992096	0.971264	1.04296	1.04811	1.31479	1.32289	1.31086	1.17902	1.17549			574	0.732649	0.671452	0.719637	0.705186	0.704668	0.714931	0.697671	0.706724	0.794618	0.749355	0.836648	0.740698	1.04699	0.851609	0.854641	0.789535	0.642393	0.847287	0.802925	0.781753	1.04246
574.2	0.81733	0.817636	0.818862	0.828474	0.826472	0.896583	0.860591	0.91214	0.923785	0.951948	0.995895	1.02913	1.05997	0.998916	1.12894	1.14316	0.988201	0.967207	1.03886	1.04437	1.30923	1.31761	1.30548	1.17457	1.17072			574.2	0.729775	0.667846	0.716485	0.701934	0.701692	0.711754	0.694336	0.703621	0.790964	0.745829	0.832925	0.737097	1.0421	0.847782	0.850533	0.786131	0.639249	0.843404	0.799608	0.777974	1.03771
574.4	0.814864	0.815664	0.816761	0.826218	0.824273	0.894379	0.858255	0.909494	0.921356	0.949305	0.992761	1.02562	1.05662	0.995774	1.12526	1.13947	0.985006	0.963653	1.03566	1.04151	1.30504	1.31331	1.3012	1.17101	1.16726			574.4	0.727523	0.664989	0.714023	0.699415	0.699314	0.709187	0.691534	0.701236	0.787895	0.742867	0.829935	0.734056	1.03834	0.844734	0.847243	0.783505	0.636758	0.840464	0.796885	0.774988	1.03399
574.6	0.81213	0.813528	0.814198	0.823491	0.821628	0.8911	0.855515	0.906464	0.91806	0.946096	0.988664	1.02155	1.05262	0.992113	1.12106	1.13515	0.981702	0.95965	1.03187	1.03765	1.30004	1.30693	1.29577	1.16651	1.1629			574.6	0.724419	0.661877	0.710693	0.696123	0.696243	0.706306	0.688417	0.698658	0.784122	0.739273	0.826139	0.730017	1.03392	0.84064	0.842997	0.779885	0.633768	0.836787	0.793314	0.771288	1.02923
574.8	0.809977	0.811308	0.812324	0.821457	0.819541	0.888514	0.853124	0.903907	0.915586	0.943485	0.985373	1.01855	1.04965	0.989196	1.11776	1.13136	0.979046	0.956835	1.02864	1.0345	1.2956	1.30223	1.29135	1.16271	1.15936			574.8	0.721948	0.659319	0.707931	0.693737	0.693826	0.70401	0.68585	0.696489	0.781304	0.736441	0.823163	0.727005	1.03018	0.837485	0.839615	0.776898	0.631463	0.833917	0.790508	0.768376	1.02543
575	0.806851	0.808028	0.809334	0.818144	0.816031	0.884424	0.849576	0.899698	0.911677	0.939236	0.980524	1.01422	1.04426	0.985054	1.11282	1.12593	0.974565	0.951984	1.02395	1.02963	1.28874	1.29592	1.28515	1.15775	1.15417			575	0.718534	0.655653	0.704179	0.689939	0.690172	0.700439	0.682003	0.692619	0.777179	0.732231	0.818295	0.722397	1.02414	0.832992	0.834965	0.772657	0.627808	0.82893	0.786099	0.76399	1.01976
575.2	0.804303	0.804807	0.806923	0.815348	0.813121	0.881083	0.846385	0.896479	0.908322	0.935791	0.976653	1.01033	1.04015	0.981603	1.10853	1.12137	0.970784	0.948049	1.01977	1.02569	1.28288	1.29058	1.27983	1.15326	1.15003			575.2	0.715603	0.652622	0.700858	0.686744	0.687187	0.697358	0.678734	0.689629	0.773563	0.728574	0.814327	0.718564	1.01935	0.829141	0.831	0.769224	0.624821	0.824911	0.78247	0.760271	1.01491
575.4	0.802318	0.802079	0.805267	0.813174	0.810974	0.8786	0.843855	0.893866	0.905652	0.933124	0.973665	1.00692	1.03729	0.979046	1.10492	1.11757	0.967594	0.945067	1.01645	1.02254	1.27787	1.28658	1.2754	1.14959	1.14658			575.4	0.713208	0.650135	0.698121	0.684424	0.684761	0.694864	0.676031	0.687324	0.770723	0.725617	0.811246	0.715494	1.01571	0.82611	0.827795	0.766477	0.622477	0.821791	0.779466	0.75729	1.01108
575.6	0.79991	0.799257	0.802323	0.810782	0.808451	0.875466	0.840869	0.889969	0.902252	0.929212	0.970134	1.00296	1.03317	0.975342	1.10021	1.11281	0.963919	0.941608	1.01244	1.01849	1.272	1.28136	1.27059	1.14467	1.1421			575.6	0.710235	0.646812	0.695016	0.681259	0.681589	0.691902	0.672808	0.683884	0.767293	0.721999	0.807446	0.711849	1.01115	0.822075	0.82371	0.763163	0.619198	0.817737	0.775913	0.753495	1.00624
575.8	0.798345	0.797048	0.799903	0.808768	0.806307	0.872931	0.838386	0.887306	0.899304	0.926527	0.967055	0.999775	1.02973	0.972157	1.0965	1.10894	0.960812	0.938563	1.00928	1.01543	1.26773	1.27667	1.26643	1.14077	1.13832			575.8	0.70788	0.644117	0.692441	0.678749	0.679011	0.689603	0.670164	0.681195	0.764596	0.719091	0.804467	0.708869	1.00707	0.818855	0.820406	0.760466	0.616464	0.814433	0.773155	0.750294	1.00252
576	0.795554	0.794603	0.796954	0.806308	0.803707	0.869612	0.835427	0.884357	0.895911	0.923214	0.962921	0.995652	1.02539	0.968317	1.09219	1.104	0.957207	0.934535	1.00586	1.01144	1.26188	1.27088	1.26114	1.13654	1.13373			576	0.704708	0.641081	0.68914	0.675475	0.67589	0.686327	0.66668	0.677982	0.761013	0.715574	0.800569	0.704937	1.00221	0.81495	0.816354	0.756825	0.613344	0.810719	0.769381	0.746557	0.997511
576.2	0.793142	0.792547	0.794687	0.804161	0.801547	0.866895	0.833094	0.881475	0.893089	0.920403	0.959717	0.992332	1.02179	0.965327	1.08864	1.1003	0.95421	0.931294	1.00292	1.00835	1.25756	1.26617	1.25675	1.13293	1.12985			576.2	0.70218	0.638795	0.686599	0.672822	0.673432	0.683745	0.664022	0.67561	0.758139	0.712691	0.797379	0.701923	0.9984	0.811629	0.813257	0.754048	0.610989	0.807883	0.766554	0.743617	0.993565
576.4	0.790302	0.790024	0.791219	0.801587	0.798943	0.863187	0.829956	0.877956	0.889615	0.916705	0.955653	0.988173	1.01692	0.961591	1.08413	1.0958	0.950473	0.927651	0.999116	1.00445	1.25191	1.26061	1.25104	1.12852	1.12575			576.4	0.699125	0.635962	0.683062	0.669688	0.670209	0.680807	0.660636	0.672837	0.754448	0.709203	0.793395	0.698353	0.993312	0.807684	0.809247	0.750427	0.60776	0.804045	0.763009	0.739755	0.988805
576.6	0.788272	0.787789	0.788647	0.799388	0.797096	0.860421	0.827483	0.875265	0.886861	0.913758	0.952485	0.984524	1.01315	0.958612	1.08054	1.09232	0.947316	0.925035	0.995953	1.0015	1.24756	1.25617	1.24645	1.12488	1.12229			576.6	0.696735	0.633647	0.680523	0.667261	0.667641	0.678452	0.657769	0.670583	0.751431	0.706353	0.790544	0.695583	0.989422	0.804484	0.805892	0.74761	0.605411	0.801277	0.760086	0.736694	0.984945
576.8	0.784622	0.784417	0.784821	0.79588	0.793763	0.855791	0.823706	0.87085	0.882524	0.909371	0.947853	0.97976	1.00796	0.954048	1.07557	1.08729	0.942208	0.921018	0.990943	0.996811	1.24156	1.24993	1.23977	1.11945	1.11701			576.8	0.692867	0.630096	0.676439	0.663841	0.66402	0.674876	0.653866	0.666681	0.747387	0.702033	0.786046	0.69115	0.983382	0.799651	0.801149	0.743381	0.601564	0.79692	0.755857	0.732043	0.979121
577	0.781782	0.781482	0.782361	0.792796	0.790921	0.852921	0.820709	0.867304	0.878799	0.905849	0.943943	0.975014	1.00372	0.95052	1.07161	1.08227	0.938335	0.917081	0.986677	0.993265	1.23643	1.24493	1.2346	1.11507	1.11248			577	0.689731	0.627137	0.673265	0.660972	0.66092	0.671644	0.650492	0.663704	0.743865	0.698124	0.782121	0.687488	0.978258	0.795824	0.796948	0.739584	0.598864	0.792796	0.752216	0.72851	0.974314
577.2	0.779557	0.779233	0.780319	0.790526	0.788499	0.85097	0.818234	0.864415	0.875777	0.902924	0.940313	0.97201	1.00024	0.947664	1.06825	1.0787	0.935235	0.914286	0.983334	0.990246	1.23208	1.24103	1.23017	1.11125	1.10911			577.2	0.687292	0.624752	0.670832	0.658711	0.6585	0.669086	0.64772	0.661362	0.741076	0.69518	0.779001	0.684403	0.974447	0.792856	0.793586	0.736656	0.596594	0.789791	0.749352	0.725668	0.970386
577.4	0.776533	0.775978	0.777191	0.787854	0.78587	0.847859	0.814866	0.861438	0.872208	0.899143	0.936283	0.968213	0.996163	0.943751	1.06394	1.07341	0.930791	0.910362	0.979711	0.986583	1.22637	1.23532	1.22428	1.10681	1.10439			577.4	0.684139	0.621888	0.667453	0.656	0.655508	0.66616	0.64447	0.65865	0.737616	0.691567	0.775221	0.680825	0.970089	0.789298	0.789465	0.733253	0.593667	0.785988	0.745666	0.722065	0.965309
577.6	0.774154	0.773541	0.774693	0.7859	0.783512	0.844869	0.812012	0.859209	0.86942	0.896167	0.933177	0.96505	0.992858	0.941005	1.06074	1.06923	0.927552	0.907516	0.976563	0.983463	1.22215	1.23053	1.22006	1.10332	1.10074			577.6	0.68169	0.619634	0.664889	0.653615	0.653012	0.663843	0.641738	0.656222	0.734755	0.688732	0.77217	0.677945	0.966661	0.786536	0.786124	0.73045	0.591354	0.782678	0.742488	0.719161	0.961326
577.8	0.771674	0.770497	0.771707	0.783196	0.780612	0.84141	0.8086	0.855753	0.865848	0.892545	0.929741	0.961084	0.98838	0.937365	1.05663	1.06443	0.923751	0.904068	0.972329	0.979503	1.21576	1.2252	1.21473	1.09881	1.0962			577.8	0.678625	0.616566	0.661646	0.650682	0.649997	0.660767	0.638404	0.65334	0.731114	0.684943	0.768401	0.674609	0.961963	0.782555	0.782101	0.727011	0.588354	0.778735	0.739082	0.715463	0.956626
578	0.769578	0.768276	0.769347	0.780903	0.778238	0.838456	0.805856	0.853049	0.86315	0.88975	0.926567	0.957594	0.984925	0.934263	1.05333	1.06083	0.920356	0.901369	0.968595	0.976524	1.21043	1.22119	1.21048	1.0954	1.09251			578	0.676278	0.614294	0.65923	0.648187	0.64766	0.658252	0.635769	0.650728	0.72818	0.682057	0.765338	0.671893	0.958114	0.779425	0.778957	0.724448	0.586008	0.775396	0.73634	0.712462	0.952965
578.2	0.766083	0.765045	0.765552	0.777555	0.774991	0.834444	0.80167	0.848997	0.859059	0.885049	0.922081	0.952299	0.979836	0.929321	1.04798	1.05519	0.915079	0.896433	0.963988	0.971814	1.20395	1.21467	1.20398	1.08988	1.08705			578.2	0.672658	0.610734	0.655324	0.644736	0.644096	0.654626	0.631961	0.646687	0.723717	0.677602	0.760916	0.667829	0.952513	0.775155	0.774078	0.720382	0.58294	0.771263	0.732099	0.708118	0.946988
578.4	0.763088	0.762165	0.762481	0.774692	0.772462	0.831047	0.798551	0.845604	0.855789	0.881204	0.918336	0.948194	0.975527	0.925119	1.04365	1.05042	0.911231	0.892387	0.960135	0.96798	1.19844	1.20908	1.19857	1.0854	1.08226			578.4	0.669716	0.607907	0.652226	0.642046	0.641015	0.65166	0.628885	0.643537	0.720011	0.673974	0.757322	0.664328	0.948017	0.771545	0.769931	0.716926	0.580237	0.767764	0.728596	0.704522	0.942172
578.6	0.760491	0.759907	0.760008	0.772254	0.770545	0.828116	0.796234	0.84294	0.853169	0.878289	0.915224	0.945011	0.971997	0.921726	1.04031	1.04659	0.908339	0.889393	0.956958	0.964822	1.19357	1.20438	1.19431	1.08188	1.07819			578.6	0.667346	0.605598	0.649757	0.639851	0.638441	0.649323	0.626472	0.641087	0.717053	0.671115	0.754354	0.661396	0.944581	0.768553	0.766667	0.714099	0.578052	0.765042	0.725689	0.701602	0.938386
578.8	0.757423	0.756747	0.756903	0.769573	0.767647	0.824661	0.79311	0.839659	0.849841	0.875123	0.910722	0.94055	0.967701	0.917787	1.03636	1.04254	0.904716	0.885446	0.952664	0.96117	1.18867	1.19838	1.18874	1.07757	1.0737			578.8	0.664261	0.602985	0.646586	0.636667	0.635523	0.64628	0.623515	0.637808	0.713402	0.667531	0.750634	0.657989	0.939722	0.764767	0.76273	0.710692	0.57511	0.761235	0.722307	0.697836	0.933548
579	0.754862	0.754295	0.754547	0.76715	0.765354	0.821894	0.790497	0.837194	0.847204	0.872611	0.907456	0.93697	0.964197	0.914714	1.03333	1.03923	0.901553	0.882318	0.949057	0.958234	1.18454	1.1935	1.18422	1.07396	1.06998			579	0.661886	0.601084	0.643988	0.634015	0.633244	0.643898	0.621013	0.6354	0.710374	0.664686	0.747589	0.655208	0.935983	0.761854	0.759453	0.708031	0.57288	0.758339	0.719626	0.695007	0.929652
579.2	0.751276	0.751256	0.751573	0.764001	0.762603	0.818553	0.78759	0.834004	0.844162	0.869045	0.903316	0.932598	0.960008	0.910768	1.02919	1.03467	0.897626	0.878447	0.945261	0.954172	1.17878	1.18794	1.17871	1.06948	1.0658			579.2	0.6589	0.598746	0.640933	0.631089	0.630274	0.640946	0.617949	0.632672	0.706668	0.661176	0.743848	0.651872	0.931336	0.758135	0.755631	0.70465	0.570446	0.754781	0.716091	0.691524	0.924872
579.4	0.748868	0.748987	0.749337	0.761695	0.760364	0.816038	0.785134	0.831385	0.841694	0.866179	0.900181	0.929244	0.95642	0.907619	1.02573	1.03055	0.894389	0.87523	0.942126	0.950992	1.17418	1.18364	1.17455	1.06557	1.06231			579.4	0.656636	0.596715	0.638521	0.628797	0.62806	0.638687	0.61551	0.630599	0.703634	0.658357	0.740898	0.649147	0.927857	0.75518	0.752571	0.701871	0.568329	0.751838	0.71331	0.688571	0.921175
579.6	0.745928	0.745888	0.746454	0.759	0.757355	0.812718	0.781858	0.828112	0.838477	0.862512	0.896	0.925306	0.952382	0.903862	1.0218	1.02592	0.890577	0.871582	0.937979	0.947065	1.16853	1.17838	1.16908	1.06117	1.0577			579.6	0.65355	0.594049	0.635348	0.626157	0.62517	0.635774	0.612619	0.627379	0.700285	0.655015	0.737291	0.645642	0.922994	0.751638	0.748608	0.698545	0.565675	0.748198	0.710063	0.684934	0.916458
579.8	0.743836	0.743369	0.744401	0.756636	0.755189	0.810048	0.779366	0.825726	0.835826	0.859779	0.892752	0.921924	0.949337	0.900911	1.01872	1.02221	0.887277	0.868336	0.9344	0.943817	1.16407	1.17483	1.16448	1.05749	1.054			579.8	0.651119	0.591961	0.632968	0.623837	0.622964	0.633389	0.610459	0.62492	0.697575	0.652278	0.73443	0.642761	0.919075	0.748892	0.745465	0.69589	0.563668	0.745331	0.707406	0.682233	0.912663
580	0.740267	0.74028	0.741255	0.753371	0.75169	0.806355	0.775332	0.821427	0.831453	0.855658	0.888347	0.916913	0.944903	0.896668	1.01391	1.01676	0.882404	0.863661	0.929909	0.939463	1.15729	1.16837	1.15819	1.05133	1.04832			580	0.647514	0.588912	0.629852	0.620213	0.61964	0.629788	0.607232	0.621514	0.693613	0.648015	0.730053	0.638553	0.91361	0.744496	0.740596	0.691892	0.560455	0.740701	0.703044	0.678057	0.906974
580.2	0.737529	0.737576	0.738272	0.750606	0.748792	0.803061	0.771829	0.818078	0.828655	0.852184	0.884645	0.912438	0.940617	0.893126	1.00939	1.01209	0.878947	0.859993	0.925807	0.935689	1.15167	1.16276	1.15298	1.04629	1.04363			580.2	0.644723	0.58626	0.627053	0.617081	0.616546	0.626705	0.604459	0.618488	0.689894	0.644539	0.726324	0.635222	0.909167	0.740864	0.736572	0.688576	0.557801	0.737105	0.699567	0.674525	0.902391
580.4	0.73534	0.735603	0.735762	0.748321	0.746485	0.800238	0.769125	0.815517	0.826194	0.849415	0.881414	0.908993	0.937365	0.890096	1.00588	1.0082	0.875871	0.85695	0.922591	0.932301	1.14705	1.15793	1.14881	1.0425	1.04003			580.4	0.642435	0.584161	0.624851	0.614542	0.614131	0.624307	0.602283	0.616295	0.68703	0.641895	0.723341	0.632489	0.90558	0.737732	0.733421	0.685962	0.555677	0.734101	0.696833	0.671687	0.898611
580.6	0.732664	0.732865	0.732765	0.745769	0.743809	0.796924	0.765919	0.811904	0.823259	0.846159	0.877435	0.905142	0.933242	0.886235	1.00166	1.00355	0.872197	0.853273	0.918697	0.928302	1.14136	1.15238	1.14382	1.03834	1.03545			580.6	0.639479	0.581512	0.621951	0.611586	0.611206	0.621428	0.599369	0.613088	0.683387	0.63849	0.719806	0.629025	0.901121	0.733739	0.729486	0.682595	0.553184	0.730236	0.693533	0.667954	0.89408
580.8	0.730518	0.730777	0.730723	0.74392	0.741506	0.794123	0.763562	0.809149	0.820619	0.843565	0.874134	0.902128	0.929865	0.883258	0.998355	0.999995	0.869222	0.850175	0.915435	0.925242	1.13692	1.14807	1.14019	1.0349	1.03189			580.8	0.637278	0.579442	0.619549	0.609254	0.60881	0.619033	0.597046	0.610511	0.680719	0.635796	0.71682	0.626343	0.897438	0.730499	0.726344	0.679691	0.551107	0.727296	0.690902	0.665029	0.890482
581	0.727494	0.727915	0.728165	0.740891	0.738781	0.791232	0.76022	0.805982	0.817079	0.84023	0.870234	0.898191	0.925762	0.879495	0.993704	0.995825	0.865568	0.846134	0.911405	0.921419	1.13157	1.14247	1.13481	1.03027	1.02762			581	0.634583	0.576798	0.616733	0.606384	0.605881	0.615983	0.594202	0.60744	0.677286	0.632452	0.713035	0.622931	0.893134	0.726586	0.722463	0.676329	0.548424	0.723522	0.687367	0.661498	0.885771
581.2	0.725019	0.725979	0.725883	0.738735	0.736533	0.788451	0.757509	0.803498	0.814365	0.837627	0.867179	0.895063	0.922556	0.876472	0.990156	0.992098	0.862736	0.842977	0.908538	0.918216	1.12763	1.13791	1.13034	1.02647	1.02423			581.2	0.632358	0.574578	0.614488	0.604021	0.603448	0.613655	0.592098	0.604781	0.674736	0.629853	0.710021	0.620207	0.889605	0.723738	0.719314	0.673636	0.546341	0.72034	0.684419	0.658655	0.881804
581.4	0.721707	0.722328	0.722678	0.735184	0.733543	0.784737	0.753568	0.799286	0.810529	0.833167	0.862801	0.890203	0.917489	0.871972	0.985202	0.986693	0.858071	0.838127	0.904542	0.913086	1.12161	1.13139	1.12389	1.02132	1.01933			581.4	0.628776	0.571114	0.610832	0.600834	0.599847	0.610112	0.589219	0.600846	0.670704	0.625743	0.705742	0.616421	0.883835	0.719359	0.71479	0.669573	0.542764	0.716233	0.680537	0.654482	0.87638
581.6	0.718709	0.71967	0.719581	0.732478	0.730627	0.781721	0.750363	0.796118	0.807222	0.83002	0.858617	0.885979	0.91328	0.868476	0.981188	0.98223	0.854445	0.83477	0.90058	0.908999	1.11629	1.12634	1.11856	1.0165	1.01516			581.6	0.62589	0.568238	0.608101	0.597789	0.596928	0.607008	0.586626	0.597997	0.667389	0.622435	0.702119	0.612923	0.87942	0.715626	0.711152	0.666211	0.540196	0.712321	0.677187	0.651016	0.871737
581.8	0.716168	0.717486	0.717051	0.730192	0.728121	0.779275	0.747897	0.793423	0.804585	0.82753	0.855339	0.882868	0.910058	0.865699	0.978007	0.978735	0.851682	0.832165	0.897185	0.905783	1.11224	1.12229	1.1142	1.01335	1.01185			581.8	0.623551	0.565824	0.605852	0.595346	0.594623	0.604687	0.584732	0.595635	0.664919	0.619738	0.699253	0.610194	0.875766	0.712589	0.708313	0.663521	0.537974	0.709441	0.674519	0.648072	0.868068
582	0.713159	0.715295	0.714327	0.727606	0.725313	0.776353	0.744716	0.790196	0.801004	0.824174	0.851529	0.879052	0.906127	0.862068	0.973555	0.974131	0.847707	0.82833	0.893312	0.90206	1.10702	1.11719	1.10903	1.00887	1.00755			582	0.620615	0.562614	0.602886	0.592299	0.591753	0.601856	0.581871	0.592686	0.661512	0.616526	0.695624	0.606804	0.871188	0.708737	0.704464	0.660175	0.535262	0.705926	0.671115	0.644643	0.863546
582.2	0.7109	0.713198	0.712151	0.725374	0.723213	0.773839	0.742323	0.787769	0.798248	0.821202	0.848423	0.876191	0.902786	0.859054	0.970187	0.970151	0.844489	0.825319	0.890415	0.898817	1.10255	1.11303	1.10507	1.00526	1.00422			582.2	0.618271	0.559961	0.600586	0.590167	0.589428	0.599702	0.579785	0.590528	0.658831	0.613907	0.692862	0.604209	0.867497	0.705825	0.701441	0.657552	0.533195	0.703007	0.668363	0.641973	0.859982
582.4	0.708	0.710558	0.709794	0.722821	0.720373	0.77031	0.738808	0.784218	0.794818	0.817587	0.844161	0.872264	0.898717	0.855389	0.965796	0.965776	0.840809	0.82147	0.886953	0.8949	1.09727	1.10833	1.10001	1.00128	0.999618			582.4	0.615552	0.556661	0.597424	0.587421	0.58649	0.596775	0.577195	0.587496	0.655584	0.61077	0.689229	0.600958	0.863196	0.702056	0.6977	0.654329	0.530227	0.699092	0.66507	0.638559	0.855433
582.6	0.705898	0.708189	0.7078	0.720464	0.717966	0.767718	0.735954	0.781327	0.791965	0.814749	0.840939	0.869201	0.895739	0.852544	0.962053	0.962247	0.837611	0.818508	0.883774	0.891838	1.09314	1.10451	1.09614	0.998028	0.995862			582.6	0.613251	0.553922	0.595135	0.585102	0.584248	0.594405	0.57516	0.584893	0.65297	0.608207	0.686432	0.598336	0.85952	0.699114	0.694574	0.651788	0.527751	0.696172	0.662409	0.63581	0.851809
582.8	0.703039	0.70479	0.704461	0.71689	0.714567	0.763727	0.731965	0.777089	0.787568	0.810662	0.835987	0.864208	0.891249	0.848587	0.957173	0.95751	0.833587	0.814337	0.879203	0.886854	1.08678	1.0989	1.08963	0.992973	0.990678			582.8	0.609973	0.549718	0.59173	0.581385	0.580817	0.591042	0.572053	0.581208	0.649554	0.604321	0.68231	0.594328	0.854247	0.694908	0.690081	0.648056	0.524412	0.691693	0.658778	0.631859	0.846578
583	0.69999	0.701898	0.701347	0.714212	0.711851	0.760733	0.728523	0.77385	0.784118	0.807112	0.831802	0.860518	0.886967	0.844942	0.952745	0.952685	0.830137	0.810684	0.87533	0.882818	1.08146	1.0931	1.08465	0.98892	0.986076			583	0.607118	0.546365	0.588509	0.578461	0.577895	0.588032	0.569266	0.578065	0.646334	0.601114	0.6788	0.59126	0.8502	0.691265	0.686313	0.644803	0.52134	0.688031	0.655338	0.628437	0.842184
583.2	0.697554	0.699628	0.698843	0.712013	0.709688	0.758209	0.726058	0.771683	0.781451	0.804037	0.828823	0.857778	0.883795	0.841941	0.949379	0.948802	0.82757	0.807684	0.872205	0.879468	1.07698	1.08814	1.08067	0.985625	0.982584			583.2	0.604835	0.543655	0.586118	0.576245	0.575638	0.585593	0.567145	0.57562	0.643492	0.598694	0.676114	0.588694	0.846876	0.688411	0.683406	0.642131	0.518945	0.684943	0.652641	0.625699	0.838516
583.4	0.694796	0.696417	0.695704	0.709252	0.707005	0.754764	0.722895	0.768848	0.778143	0.800598	0.82467	0.8542	0.879849	0.837865	0.945305	0.944173	0.824105	0.803624	0.868488	0.87554	1.0718	1.08268	1.07536	0.981629	0.97835			583.4	0.601849	0.540517	0.583015	0.573544	0.572677	0.582734	0.564317	0.572705	0.640268	0.595432	0.672636	0.585532	0.842294	0.684656	0.679635	0.63869	0.516068	0.681356	0.649092	0.62242	0.834166
583.6	0.69271	0.694183	0.693449	0.707207	0.704841	0.752134	0.720544	0.766476	0.775579	0.797738	0.821908	0.851578	0.876914	0.834536	0.941943	0.940484	0.821347	0.800576	0.86557	0.872737	1.06762	1.07874	1.07119	0.978323	0.97491			583.6	0.599552	0.538008	0.580533	0.571363	0.570477	0.580554	0.561926	0.570326	0.637731	0.592808	0.670049	0.582923	0.838494	0.681778	0.676692	0.636137	0.513679	0.678522	0.646532	0.619768	0.830628
583.8	0.689961	0.691212	0.690589	0.704562	0.701964	0.748939	0.717399	0.763226	0.772337	0.794191	0.818164	0.847657	0.872707	0.83104	0.937808	0.936572	0.817551	0.796787	0.861915	0.868747	1.06289	1.07393	1.06609	0.974162	0.970567			583.8	0.596533	0.53472	0.577612	0.568433	0.567704	0.577933	0.559438	0.567676	0.634586	0.589583	0.666507	0.57985	0.83366	0.678557	0.67318	0.633071	0.510749	0.675055	0.643017	0.616493	0.826244
584	0.687832	0.689005	0.688366	0.701982	0.699866	0.746707	0.715031	0.760621	0.769619	0.791252	0.815126	0.844048	0.86953	0.828267	0.934636	0.933138	0.814662	0.793902	0.858973	0.865712	1.05931	1.06992	1.06163	0.970629	0.967023			584	0.594142	0.532095	0.575259	0.566136	0.565478	0.575593	0.557556	0.565319	0.632135	0.586912	0.663693	0.577235	0.830042	0.675897	0.670509	0.630623	0.508465	0.672401	0.640286	0.61386	0.822772
584.2	0.684162	0.685976	0.684785	0.698595	0.696669	0.74221	0.710981	0.756894	0.765725	0.786948	0.81037	0.838891	0.864519	0.823914	0.930077	0.92764	0.810288	0.789737	0.854525	0.860907	1.05312	1.06419	1.05464	0.965122	0.961856			584.2	0.590628	0.528234	0.571913	0.562598	0.562082	0.572434	0.554367	0.561656	0.628257	0.583175	0.659623	0.573894	0.824748	0.671612	0.66633	0.626839	0.50503	0.667992	0.636534	0.610016	0.817568
584.4	0.682661	0.684221	0.683281	0.696849	0.694781	0.740621	0.709235	0.754999	0.763644	0.78467	0.807854	0.836217	0.862275	0.821499	0.927831	0.925287	0.808069	0.787735	0.852477	0.858741	1.04968	1.06091	1.05149	0.962762	0.959084			584.4	0.588772	0.526435	0.570286	0.561044	0.560436	0.570836	0.552575	0.5599	0.626307	0.581316	0.65766	0.571961	0.821848	0.669521	0.664201	0.624926	0.5032	0.665872	0.634649	0.608065	0.815045
584.6	0.678869	0.680505	0.679886	0.693605	0.691421	0.736906	0.706042	0.751163	0.759346	0.780516	0.802872	0.831475	0.857514	0.817366	0.923118	0.920083	0.803528	0.783349	0.847741	0.854169	1.04397	1.05487	1.04579	0.957386	0.95393			584.6	0.58542	0.522765	0.566665	0.557784	0.557171	0.567692	0.54896	0.556816	0.622219	0.577589	0.6537	0.568164	0.816418	0.665226	0.659798	0.621044	0.500003	0.661547	0.630885	0.604378	0.809881
584.8	0.676464	0.677341	0.677015	0.690969	0.688586	0.734181	0.703268	0.747815	0.755971	0.777464	0.79917	0.827828	0.853895	0.813979	0.918911	0.916046	0.799586	0.779469	0.843858	0.850802	1.03858	1.05007	1.04081	0.953028	0.949247			584.8	0.582564	0.519829	0.563763	0.555061	0.554499	0.565047	0.546026	0.55437	0.619008	0.574499	0.650386	0.565022	0.812122	0.661717	0.656328	0.617939	0.497353	0.657837	0.627344	0.601217	0.805742
585	0.674533	0.674786	0.675066	0.688923	0.686568	0.731709	0.701074	0.744789	0.753327	0.774815	0.796141	0.824735	0.850717	0.811196	0.915498	0.912901	0.796295	0.776248	0.841078	0.847935	1.03458	1.04572	1.03715	0.94974	0.94581			585	0.580339	0.517276	0.561432	0.552763	0.552384	0.56294	0.54372	0.552214	0.616458	0.572028	0.647672	0.562659	0.808485	0.658957	0.653637	0.61544	0.495123	0.65508	0.624639	0.598764	0.802441
585.2	0.672022	0.672175	0.672262	0.686083	0.683803	0.728534	0.697747	0.741572	0.750024	0.771362	0.792082	0.820947	0.846738	0.807616	0.9111	0.908604	0.792289	0.772759	0.837531	0.843987	1.02931	1.04019	1.03217	0.945509	0.94198			585.2	0.57755	0.514531	0.558678	0.550193	0.549683	0.560135	0.540886	0.549218	0.613082	0.568983	0.644412	0.559738	0.804265	0.655749	0.650058	0.612392	0.492399	0.651598	0.621554	0.595749	0.797912
585.4	0.670002	0.670031	0.67008	0.683838	0.681487	0.725933	0.69502	0.738957	0.747447	0.768524	0.78928	0.817708	0.843707	0.804909	0.907722	0.905123	0.789268	0.769659	0.834541	0.840775	1.02508	1.03594	1.02824	0.942072	0.938592			585.4	0.575313	0.512442	0.556492	0.548108	0.547513	0.557891	0.538574	0.546808	0.610617	0.566631	0.641726	0.557509	0.800602	0.653302	0.647246	0.60993	0.490411	0.648682	0.619053	0.593246	0.794504
585.6	0.666761	0.666653	0.666537	0.680277	0.678359	0.722569	0.691713	0.735284	0.74333	0.764808	0.785196	0.813023	0.839331	0.800508	0.902597	0.899992	0.784527	0.765495	0.830095	0.836416	1.01903	1.02983	1.0225	0.936814	0.933391			585.6	0.571667	0.50893	0.553259	0.544778	0.544269	0.554299	0.534946	0.543358	0.606983	0.562819	0.637733	0.553804	0.795147	0.649406	0.642958	0.605892	0.487068	0.644394	0.615146	0.589435	0.789361
585.8	0.664967	0.664946	0.664771	0.678696	0.676803	0.720625	0.690303	0.73376	0.741412	0.762598	0.783179	0.81087	0.836687	0.798533	0.900248	0.897252	0.782212	0.763384	0.82797	0.834108	1.0161	1.02721	1.01957	0.934183	0.931169			585.8	0.569967	0.507303	0.551401	0.543103	0.542734	0.552719	0.532998	0.541697	0.605193	0.561003	0.635784	0.552079	0.79251	0.647342	0.640965	0.603955	0.48554	0.642358	0.6132	0.587602	0.787022
586	0.661698	0.661692	0.661823	0.675573	0.673434	0.717267	0.68686	0.729928	0.737481	0.758473	0.779163	0.806637	0.832655	0.793944	0.895599	0.892011	0.777889	0.758618	0.823437	0.829615	1.01018	1.0204	1.01339	0.92933	0.926378			586	0.566482	0.503943	0.548277	0.539654	0.539348	0.549351	0.529287	0.538269	0.601547	0.557254	0.631954	0.54853	0.787154	0.643407	0.636801	0.60029	0.482621	0.637869	0.609332	0.583939	0.781885
586.2	0.658873	0.65843	0.6592	0.672903	0.670951	0.714226	0.683993	0.726805	0.734065	0.755378	0.775462	0.80274	0.828655	0.789977	0.891658	0.887309	0.77392	0.754818	0.819876	0.826282	1.00525	1.01541	1.00832	0.92504	0.922363			586.2	0.563734	0.501222	0.545518	0.537242	0.536726	0.546495	0.526103	0.53538	0.598218	0.554194	0.628637	0.545457	0.783109	0.639988	0.63342	0.597056	0.480152	0.634177	0.60602	0.580979	0.777499
586.4	0.656574	0.655831	0.657314	0.670709	0.668778	0.711671	0.681728	0.724146	0.731594	0.752802	0.772626	0.799549	0.825624	0.78691	0.888652	0.884176	0.770855	0.75197	0.817291	0.82349	1.00136	1.0113	1.00433	0.921655	0.919037			586.4	0.56163	0.498886	0.543495	0.535175	0.534635	0.544336	0.523557	0.533208	0.595763	0.55163	0.625953	0.542896	0.779826	0.637297	0.630833	0.594573	0.478262	0.631309	0.603691	0.578539	0.774113
586.6	0.65391	0.653508	0.654544	0.668099	0.665946	0.708648	0.678977	0.720993	0.728273	0.749657	0.769037	0.795662	0.821696	0.783407	0.884821	0.880435	0.766968	0.748409	0.81351	0.819776	0.996862	1.00658	0.999716	0.917479	0.914759			586.6	0.559008	0.496439	0.541007	0.532503	0.531923	0.541718	0.520777	0.530181	0.592686	0.548391	0.622596	0.540002	0.775262	0.634085	0.627453	0.59153	0.475866	0.627546	0.600719	0.575361	0.769911
586.8	0.651747	0.6514	0.652589	0.665925	0.663666	0.706174	0.676681	0.71841	0.7254	0.747033	0.766224	0.792242	0.818501	0.780666	0.881644	0.876721	0.763696	0.745571	0.810391	0.816702	0.99283	1.0027	0.995947	0.914314	0.911467			586.8	0.556985	0.494193	0.53903	0.530423	0.529832	0.539538	0.51843	0.527745	0.5903	0.546007	0.619907	0.537805	0.771809	0.631592	0.624778	0.589187	0.47381	0.624579	0.598228	0.572811	0.766702
587	0.648541	0.648023	0.649695	0.662921	0.660705	0.702002	0.672923	0.715218	0.72159	0.743212	0.761875	0.787572	0.814454	0.776852	0.876853	0.871838	0.759085	0.741594	0.806153	0.81214	0.986669	0.996749	0.989654	0.909588	0.906475			587	0.553965	0.490942	0.535637	0.527315	0.526663	0.536195	0.514856	0.524513	0.586631	0.542395	0.61611	0.534088	0.766978	0.628044	0.620961	0.585589	0.470782	0.620218	0.594577	0.569094	0.761742
587.2	0.647084	0.646219	0.647796	0.66144	0.658918	0.700338	0.671389	0.713762	0.719808	0.741373	0.759886	0.785484	0.812269	0.774663	0.874532	0.869647	0.756722	0.739559	0.804025	0.809817	0.983337	0.993444	0.986958	0.907236	0.904168			587.2	0.552536	0.489355	0.534105	0.525726	0.525033	0.534604	0.513073	0.522976	0.584774	0.54085	0.614249	0.532485	0.764506	0.626009	0.618726	0.5838	0.469374	0.617927	0.59275	0.567363	0.759246
587.4	0.643559	0.642892	0.644619	0.658115	0.655461	0.696379	0.667959	0.709855	0.71607	0.73758	0.755421	0.780902	0.807728	0.770705	0.869779	0.864995	0.752237	0.735737	0.799823	0.805277	0.977695	0.987878	0.981514	0.902656	0.899265			587.4	0.549296	0.486107	0.530598	0.52265	0.521821	0.531413	0.509552	0.519453	0.581133	0.537234	0.610564	0.528489	0.759201	0.622238	0.614606	0.580166	0.466633	0.613661	0.5893	0.563678	0.754185
587.6	0.641224	0.640359	0.642146	0.655211	0.652792	0.693347	0.665065	0.706393	0.712974	0.734219	0.752239	0.777202	0.803703	0.76735	0.865961	0.861094	0.748884	0.732098	0.796057	0.801627	0.972674	0.983114	0.976928	0.898453	0.895015			587.6	0.54658	0.483297	0.527822	0.520234	0.519401	0.528628	0.506643	0.516463	0.578021	0.534255	0.607157	0.525545	0.754988	0.619263	0.611294	0.577208	0.464148	0.6102	0.586454	0.560414	0.750114
587.8	0.638946	0.638374	0.640157	0.653151	0.650705	0.690819	0.662628	0.703738	0.710728	0.731635	0.74977	0.774441	0.800432	0.764852	0.862749	0.85783	0.745729	0.729316	0.792979	0.798843	0.968821	0.979373	0.973154	0.895394	0.891585			587.8	0.544417	0.481075	0.525662	0.518196	0.517378	0.526406	0.504451	0.514138	0.575553	0.5318	0.604559	0.523288	0.751743	0.616846	0.60862	0.574961	0.462254	0.607336	0.584038	0.557895	0.746989
588	0.636191	0.635444	0.637324	0.650282	0.648033	0.68729	0.659433	0.700684	0.707669	0.728457	0.746266	0.770724	0.796595	0.761363	0.858569	0.853284	0.742444	0.72597	0.789617	0.79514	0.963827	0.974548	0.968506	0.891429	0.887312			588	0.541832	0.478474	0.522929	0.515494	0.514665	0.52371	0.501589	0.51117	0.572843	0.528949	0.60131	0.520309	0.747943	0.613858	0.605307	0.571955	0.459799	0.603718	0.580986	0.554675	0.742863
588.2	0.634018	0.633443	0.634913	0.64799	0.645898	0.684718	0.656919	0.698062	0.705008	0.725725	0.743649	0.767851	0.793431	0.758391	0.855506	0.849729	0.739527	0.723197	0.786706	0.792197	0.959737	0.970428	0.964417	0.888249	0.88392			588.2	0.539731	0.476387	0.52089	0.513425	0.512533	0.52161	0.499026	0.509111	0.570556	0.526573	0.598673	0.51795	0.744421	0.611441	0.602625	0.569495	0.457945	0.600998	0.578686	0.552275	0.739433
588.4	0.630543	0.630097	0.631602	0.644805	0.642373	0.681179	0.653217	0.694214	0.701018	0.721582	0.739744	0.763346	0.789141	0.754551	0.851136	0.844254	0.73556	0.719039	0.782082	0.787664	0.953965	0.964659	0.958821	0.883084	0.878568			588.4	0.536624	0.473311	0.517227	0.510213	0.509433	0.518516	0.495414	0.505663	0.567026	0.523139	0.594784	0.514688	0.739587	0.607635	0.598638	0.565926	0.455183	0.596883	0.575006	0.548514	0.734628
588.6	0.628894	0.628349	0.629885	0.643277	0.640784	0.679105	0.651465	0.692127	0.699169	0.719653	0.737553	0.761247	0.786642	0.752693	0.849146	0.841898	0.733467	0.716893	0.780011	0.785599	0.951317	0.9619	0.955931	0.88037	0.875902			588.6	0.535145	0.471617	0.515482	0.508606	0.507934	0.516963	0.493648	0.504072	0.56517	0.521417	0.592942	0.51274	0.737018	0.60573	0.596639	0.56413	0.453761	0.594925	0.573248	0.546657	0.732154
588.8	0.625434	0.625116	0.626571	0.640105	0.637642	0.675173	0.648049	0.688238	0.695866	0.715787	0.733492	0.757072	0.781933	0.748795	0.844886	0.83696	0.729328	0.712904	0.77601	0.781421	0.945292	0.956008	0.949789	0.875549	0.870934			588.8	0.532249	0.468408	0.512272	0.50551	0.504828	0.513868	0.490338	0.500667	0.561376	0.517887	0.589229	0.509497	0.73184	0.602	0.592677	0.560719	0.450732	0.590828	0.569798	0.543172	0.727589
589	0.62273	0.62231	0.623819	0.637371	0.634766	0.672134	0.644576	0.684936	0.692619	0.712731	0.729961	0.753168	0.778272	0.745464	0.840978	0.833089	0.72632	0.709559	0.772443	0.777913	0.940374	0.950604	0.945015	0.87169	0.866908			589	0.529859	0.4659	0.509498	0.502918	0.502264	0.511374	0.487643	0.497859	0.558267	0.515003	0.586057	0.506925	0.727603	0.598889	0.589506	0.557774	0.448547	0.587579	0.566874	0.540192	0.723673
589.2	0.620592	0.620169	0.621547	0.634991	0.632695	0.669517	0.641916	0.682384	0.690144	0.710085	0.727237	0.750199	0.775438	0.742621	0.838013	0.830102	0.723444	0.706914	0.769498	0.775102	0.936667	0.946247	0.941232	0.868217	0.863537			589.2	0.527908	0.463862	0.507334	0.5008	0.500188	0.509317	0.485572	0.495592	0.55572	0.512611	0.583498	0.504692	0.724338	0.596401	0.586858	0.555459	0.446679	0.584968	0.564743	0.537771	0.720512
589.4	0.617888	0.617363	0.618493	0.632168	0.630003	0.666636	0.639218	0.679453	0.687035	0.70701	0.723692	0.746219	0.771168	0.739236	0.833821	0.826087	0.720049	0.703531	0.765864	0.771825	0.932085	0.941343	0.936504	0.864022	0.859126			589.4	0.525416	0.461405	0.504663	0.498242	0.497686	0.506787	0.48282	0.492961	0.552586	0.509885	0.580425	0.502061	0.72034	0.593265	0.583757	0.552552	0.444335	0.581668	0.561721	0.534818	0.716536
589.6	0.615589	0.615578	0.616259	0.630035	0.62779	0.664073	0.636817	0.67685	0.684664	0.704484	0.720922	0.743065	0.768186	0.736541	0.830532	0.823092	0.717465	0.70079	0.762968	0.768911	0.928303	0.937189	0.932517	0.86049	0.855661			589.6	0.523482	0.459339	0.502359	0.496057	0.495639	0.504754	0.480642	0.490906	0.550325	0.507693	0.578049	0.499969	0.716858	0.590754	0.581177	0.550319	0.44239	0.579221	0.559523	0.53235	0.713393
589.8	0.612199	0.612358	0.613278	0.626498	0.624656	0.660493	0.633281	0.67289	0.680768	0.700757	0.716874	0.73858	0.763526	0.73282	0.825869	0.817813	0.713386	0.696759	0.75863	0.764705	0.922502	0.931401	0.927191	0.856221	0.851092			589.8	0.520258	0.455976	0.498655	0.492865	0.492651	0.501888	0.47722	0.487597	0.546758	0.504285	0.57444	0.49705	0.712192	0.587071	0.577317	0.546702	0.439622	0.575543	0.555932	0.52868	0.708874
590	0.61071	0.610568	0.611429	0.624784	0.623215	0.658632	0.631432	0.670637	0.678963	0.698671	0.714881	0.736398	0.76116	0.730749	0.823467	0.815599	0.711477	0.695267	0.756472	0.762635	0.919807	0.928047	0.924571	0.853606	0.848543			590	0.518536	0.454535	0.49718	0.491345	0.491214	0.500441	0.475604	0.486014	0.54495	0.502522	0.572645	0.495437	0.70993	0.585231	0.575412	0.545007	0.438291	0.573496	0.554209	0.526789	0.706478
590.2	0.607406	0.607716	0.608043	0.621595	0.619996	0.655084	0.627978	0.6668	0.675072	0.694814	0.71104	0.731915	0.756832	0.726773	0.818785	0.810781	0.707939	0.691256	0.752354	0.758117	0.913854	0.922353	0.919701	0.848972	0.843583			590.2	0.515484	0.451662	0.493665	0.48815	0.488262	0.497546	0.47226	0.48268	0.541119	0.499304	0.568963	0.492186	0.704916	0.581276	0.571537	0.541532	0.435647	0.569853	0.55073	0.523356	0.701669
590.4	0.604474	0.604873	0.605056	0.618692	0.617263	0.652052	0.624994	0.663435	0.671959	0.691388	0.707431	0.728448	0.752781	0.723088	0.814914	0.806773	0.704775	0.687508	0.748679	0.754557	0.908999	0.917344	0.914847	0.844819	0.839418			590.4	0.512813	0.449132	0.49112	0.485658	0.485802	0.49511	0.469492	0.479999	0.53834	0.49642	0.565745	0.489478	0.700777	0.578139	0.568228	0.538619	0.43333	0.566625	0.547811	0.520647	0.697778
590.6	0.602222	0.602767	0.603006	0.616543	0.615389	0.649563	0.622606	0.661133	0.669516	0.688726	0.704747	0.725786	0.749625	0.720183	0.811637	0.803197	0.70221	0.684504	0.74564	0.751729	0.905043	0.913102	0.911292	0.84148	0.836194			590.6	0.510668	0.447124	0.48895	0.483566	0.483759	0.493082	0.467227	0.477932	0.536111	0.494025	0.563158	0.487443	0.697519	0.575811	0.565772	0.536343	0.431515	0.564129	0.54554	0.51842	0.694681
590.8	0.599758	0.600284	0.600271	0.614054	0.612778	0.646861	0.619417	0.657736	0.666353	0.685433	0.701127	0.722496	0.745904	0.716629	0.807584	0.799205	0.698773	0.681265	0.74202	0.748338	0.900055	0.908057	0.906927	0.837502	0.832281			590.8	0.508068	0.444703	0.486303	0.481124	0.481274	0.490477	0.46426	0.475597	0.533041	0.491319	0.560134	0.484908	0.693282	0.57276	0.562618	0.533517	0.429156	0.561222	0.542524	0.515632	0.690634
591	0.59762	0.598096	0.597761	0.61215	0.610642	0.644451	0.616902	0.655369	0.663892	0.682663	0.698452	0.719778	0.742773	0.71377	0.804358	0.795851	0.695846	0.678622	0.739165	0.745358	0.896368	0.904101	0.903526	0.834556	0.829266			591	0.506065	0.442694	0.484049	0.47908	0.479264	0.48846	0.461857	0.473669	0.530672	0.489137	0.55785	0.482705	0.689855	0.57029	0.560083	0.531134	0.427555	0.558993	0.540115	0.513485	0.687317
591.2	0.59439	0.594833	0.594591	0.609054	0.607478	0.640771	0.613439	0.651497	0.660206	0.678932	0.693713	0.715602	0.739006	0.70959	0.799974	0.790695	0.691977	0.674726	0.734807	0.741065	0.890969	0.897931	0.897457	0.829948	0.824459			591.2	0.5032	0.439761	0.480931	0.47589	0.476346	0.485503	0.458696	0.470491	0.527056	0.485864	0.554185	0.479498	0.68469	0.566431	0.556427	0.527636	0.424792	0.555677	0.536722	0.510193	0.682723
591.4	0.591718	0.592279	0.592573	0.6063	0.60479	0.637824	0.610356	0.648807	0.657093	0.675818	0.689965	0.711834	0.73525	0.70586	0.796103	0.786829	0.689102	0.671175	0.731047	0.737669	0.886275	0.892949	0.893164	0.826089	0.820572			591.4	0.500556	0.437218	0.478312	0.473572	0.4738	0.482909	0.456138	0.467566	0.523952	0.483123	0.551034	0.47694	0.68069	0.56336	0.553177	0.524733	0.422342	0.552658	0.533991	0.507449	0.678957
591.6	0.589264	0.590358	0.590579	0.604021	0.602554	0.635257	0.608132	0.646626	0.65468	0.673386	0.686885	0.708788	0.732698	0.703013	0.792766	0.783726	0.686661	0.668302	0.728375	0.734771	0.882416	0.888864	0.889443	0.823097	0.817335			591.6	0.49844	0.43529	0.476088	0.471788	0.471694	0.480919	0.454067	0.465395	0.521569	0.480944	0.548629	0.474818	0.677675	0.561046	0.550558	0.522486	0.420443	0.550233	0.531883	0.505107	0.675973
591.8	0.586646	0.58798	0.588056	0.601293	0.600111	0.631814	0.605413	0.643454	0.651353	0.670085	0.683208	0.705087	0.729269	0.699581	0.788957	0.779856	0.683396	0.665169	0.724666	0.731348	0.878039	0.883993	0.884745	0.819202	0.813516			591.8	0.495854	0.432586	0.473624	0.469435	0.469243	0.478504	0.451228	0.462886	0.518731	0.478221	0.545615	0.472264	0.673884	0.557903	0.547557	0.51959	0.417926	0.547179	0.52888	0.502262	0.672184
592	0.584712	0.585971	0.586039	0.599273	0.597828	0.629501	0.60316	0.640896	0.648615	0.667487	0.680187	0.702173	0.726571	0.696606	0.78587	0.776566	0.680731	0.662463	0.721706	0.728273	0.874357	0.880174	0.881176	0.816196	0.810435			592	0.493748	0.430712	0.471566	0.467502	0.467311	0.476578	0.448809	0.46089	0.516632	0.476096	0.543256	0.470347	0.670901	0.555286	0.5452	0.517336	0.416068	0.544756	0.526551	0.499909	0.66905
592.2	0.582082	0.583327	0.583414	0.59639	0.59511	0.626423	0.600378	0.63808	0.645494	0.664057	0.676734	0.698413	0.722311	0.693135	0.782063	0.773076	0.677375	0.659527	0.717896	0.724718	0.869959	0.875926	0.877232	0.812364	0.806294			592.2	0.491161	0.428135	0.469129	0.465119	0.464869	0.474079	0.446028	0.45832	0.513958	0.473424	0.54027	0.4674	0.667228	0.552328	0.542212	0.51445	0.413867	0.541792	0.523785	0.497098	0.665448
592.4	0.580145	0.581229	0.581205	0.594339	0.593088	0.624039	0.598077	0.635819	0.643146	0.661461	0.673856	0.695595	0.719146	0.690255	0.778965	0.770188	0.674554	0.656957	0.714944	0.721948	0.866455	0.872433	0.873955	0.809173	0.80303			592.4	0.489128	0.426132	0.46713	0.463313	0.46276	0.472069	0.443811	0.456206	0.511655	0.471227	0.537873	0.465126	0.664402	0.549954	0.539726	0.512326	0.411871	0.539301	0.521538	0.494798	0.662496
592.6	0.576806	0.578494	0.578136	0.591608	0.589857	0.619963	0.594412	0.631851	0.639723	0.657947	0.669378	0.691451	0.715049	0.686385	0.774336	0.765268	0.670588	0.653097	0.711182	0.71769	0.860828	0.867367	0.868588	0.804248	0.798391			592.6	0.486145	0.422974	0.464068	0.4606	0.459793	0.469049	0.440585	0.453003	0.508604	0.468039	0.534316	0.46198	0.659656	0.546337	0.535807	0.508909	0.409084	0.535709	0.518148	0.491275	0.658031
592.8	0.574271	0.575761	0.575139	0.589136	0.587117	0.616968	0.591594	0.628939	0.636853	0.654629	0.665828	0.688129	0.711455	0.683096	0.770323	0.761323	0.66709	0.649972	0.707915	0.714057	0.856476	0.863219	0.864301	0.800429	0.794679			592.8	0.483518	0.420531	0.46164	0.458193	0.457346	0.466523	0.437904	0.450447	0.50582	0.46531	0.531454	0.459103	0.655818	0.543366	0.532774	0.50608	0.406665	0.532546	0.515102	0.488492	0.654244
593	0.572137	0.573659	0.573024	0.587082	0.584972	0.614437	0.589437	0.626516	0.63454	0.652034	0.663104	0.685681	0.708675	0.680224	0.767383	0.758306	0.664431	0.647319	0.705246	0.71095	0.852742	0.859707	0.860768	0.797342	0.79147			593	0.481505	0.418602	0.459811	0.456312	0.455422	0.46452	0.435836	0.448338	0.503437	0.463118	0.529035	0.456912	0.652634	0.54101	0.530452	0.503975	0.404894	0.530402	0.5127	0.486324	0.651257
593.2	0.569439	0.570951	0.570346	0.58443	0.582337	0.611131	0.586704	0.623452	0.631461	0.649092	0.659758	0.682286	0.70505	0.676589	0.763442	0.75464	0.661105	0.643653	0.701692	0.707548	0.848026	0.855321	0.855831	0.792994	0.787293			593.2	0.478989	0.41615	0.457108	0.453907	0.453003	0.461959	0.433092	0.445657	0.500802	0.46056	0.525993	0.454119	0.648592	0.537843	0.527395	0.501031	0.402598	0.527305	0.509956	0.483639	0.647396
593.4	0.56693	0.568968	0.568211	0.582246	0.580141	0.608769	0.584424	0.620925	0.628954	0.646691	0.656881	0.679595	0.701982	0.673871	0.760454	0.751875	0.658428	0.6407	0.698941	0.704781	0.844337	0.851571	0.852182	0.789766	0.783984			593.4	0.476953	0.414123	0.454978	0.451949	0.451095	0.459874	0.430806	0.443587	0.498762	0.458334	0.52353	0.451836	0.645532	0.535421	0.525004	0.498692	0.400733	0.524938	0.507772	0.481463	0.644407
593.6	0.563993	0.565873	0.56538	0.579158	0.577178	0.605182	0.581012	0.617068	0.62559	0.643016	0.65268	0.675688	0.697732	0.669892	0.755849	0.74715	0.654021	0.636737	0.694789	0.700807	0.838927	0.84643	0.84698	0.784978	0.779354			593.6	0.474067	0.411107	0.452156	0.448961	0.447969	0.456864	0.427638	0.440298	0.495682	0.455128	0.520076	0.448987	0.640791	0.531746	0.521369	0.495457	0.397775	0.521572	0.504665	0.478107	0.64018
593.8	0.562613	0.564352	0.563729	0.577529	0.575662	0.60309	0.579324	0.615403	0.623703	0.641358	0.650639	0.673668	0.695765	0.667769	0.753534	0.744956	0.652023	0.634683	0.69282	0.698725	0.836149	0.84368	0.843949	0.782513	0.776954			593.8	0.472652	0.409646	0.450682	0.447454	0.446621	0.455469	0.426053	0.438729	0.494112	0.453596	0.518241	0.447374	0.638398	0.529832	0.51957	0.493952	0.396053	0.519848	0.502933	0.476422	0.638034
594	0.558921	0.561099	0.560231	0.574598	0.572169	0.599309	0.576296	0.612087	0.619654	0.637694	0.646708	0.669037	0.691509	0.663645	0.749164	0.740266	0.648081	0.630868	0.688869	0.694594	0.831119	0.838369	0.838425	0.777948	0.772148			594	0.469793	0.406836	0.447515	0.444533	0.443663	0.452608	0.422925	0.435685	0.490666	0.450482	0.514949	0.444066	0.633349	0.52624	0.516002	0.490611	0.393368	0.51631	0.499279	0.472898	0.633878
594.2	0.556375	0.558423	0.557538	0.571868	0.569374	0.596434	0.573683	0.608998	0.61657	0.634795	0.643079	0.665225	0.687982	0.660426	0.74563	0.736149	0.644858	0.627242	0.685707	0.691332	0.826492	0.83384	0.83371	0.773792	0.768012			594.2	0.467238	0.404362	0.445263	0.442323	0.44118	0.450151	0.420257	0.433263	0.487845	0.44772	0.51208	0.441389	0.629624	0.523347	0.512842	0.487958	0.391007	0.513241	0.496596	0.470106	0.630459
594.4	0.554141	0.556439	0.5554	0.569774	0.567221	0.594222	0.571684	0.606556	0.614079	0.632339	0.640406	0.662115	0.68512	0.657932	0.742711	0.733007	0.642392	0.624904	0.682974	0.688809	0.822794	0.830318	0.829835	0.770513	0.764859			594.4	0.465158	0.402402	0.443378	0.440391	0.43916	0.448196	0.418021	0.431363	0.485763	0.445579	0.509724	0.439331	0.626483	0.521132	0.5105	0.485859	0.388901	0.510886	0.494305	0.467896	0.627649
594.6	0.55206	0.553861	0.552807	0.566907	0.564602	0.59139	0.569221	0.603547	0.611124	0.629558	0.637348	0.658558	0.681448	0.654567	0.73882	0.729341	0.639334	0.621769	0.679616	0.685429	0.81809	0.826574	0.825222	0.766328	0.761133			594.6	0.462742	0.40016	0.440884	0.437865	0.436704	0.445709	0.415546	0.429223	0.483086	0.443088	0.50693	0.436635	0.62293	0.518071	0.50744	0.483213	0.386474	0.507881	0.491558	0.465038	0.624032
594.8	0.550192	0.551796	0.550598	0.564833	0.56261	0.588904	0.56701	0.600946	0.608682	0.627147	0.635057	0.655736	0.678717	0.652211	0.735973	0.726166	0.636677	0.61961	0.676861	0.682729	0.814395	0.823587	0.821382	0.763168	0.758082			594.8	0.460808	0.398326	0.43893	0.43584	0.434826	0.443708	0.413722	0.427438	0.480853	0.441058	0.504709	0.434574	0.619864	0.515616	0.505058	0.481087	0.384466	0.505489	0.48941	0.4628	0.621144
595	0.547394	0.548648	0.547278	0.562034	0.559413	0.585964	0.563432	0.597484	0.604799	0.623546	0.631322	0.651405	0.674467	0.647968	0.731449	0.722089	0.632829	0.615725	0.673078	0.678307	0.809394	0.818465	0.816487	0.758259	0.753398			595	0.457772	0.39562	0.435778	0.432986	0.432189	0.440775	0.410619	0.424343	0.477565	0.437899	0.50144	0.431638	0.6149	0.511806	0.501718	0.477809	0.3819	0.501944	0.486107	0.459639	0.616888
595.2	0.545559	0.546876	0.545695	0.560241	0.557915	0.584197	0.561784	0.596099	0.603013	0.62182	0.629537	0.649382	0.672234	0.645802	0.729235	0.71985	0.630996	0.613498	0.670994	0.676243	0.807041	0.815642	0.813939	0.75615	0.751118			595.2	0.456211	0.394237	0.43428	0.43147	0.43076	0.439334	0.409362	0.422752	0.475718	0.436209	0.499689	0.430118	0.612514	0.510269	0.499914	0.476265	0.380487	0.500193	0.48452	0.45805	0.614704
595.4	0.542343	0.543989	0.542527	0.557237	0.554867	0.580761	0.558443	0.592442	0.599493	0.618164	0.625775	0.645118	0.668569	0.641924	0.72453	0.71519	0.626546	0.609351	0.667293	0.67234	0.801595	0.810194	0.808415	0.751194	0.746345			595.4	0.453328	0.391544	0.43142	0.428658	0.427807	0.436389	0.40652	0.419808	0.472306	0.433176	0.496255	0.427008	0.607602	0.506633	0.496147	0.47312	0.377486	0.496657	0.481052	0.454957	0.610306
595.6	0.539408	0.541246	0.539857	0.554576	0.552308	0.577576	0.555945	0.589287	0.596499	0.615349	0.623092	0.641439	0.664939	0.638852	0.720761	0.711314	0.623439	0.606273	0.663753	0.668976	0.797102	0.805763	0.803776	0.747509	0.742261			595.6	0.450792	0.389262	0.428995	0.426284	0.425547	0.434069	0.404252	0.417264	0.469521	0.430599	0.49338	0.424464	0.603406	0.503759	0.493232	0.470488	0.375107	0.493973	0.478114	0.452274	0.606623
595.8	0.537099	0.539195	0.537726	0.552365	0.550156	0.575091	0.55385	0.586703	0.5941	0.613005	0.620671	0.638517	0.662184	0.636484	0.717727	0.708466	0.620985	0.603651	0.660695	0.666225	0.793421	0.802105	0.799977	0.744747	0.739007			595.8	0.448838	0.38755	0.426951	0.424255	0.423701	0.432136	0.402263	0.415267	0.467365	0.428643	0.491159	0.422408	0.600112	0.501297	0.490984	0.468463	0.373235	0.491608	0.475734	0.4502	0.603581
596	0.534354	0.536481	0.535224	0.549717	0.547411	0.572455	0.550984	0.583775	0.591008	0.610052	0.617211	0.635163	0.658767	0.633101	0.714151	0.704252	0.61772	0.600774	0.657259	0.662695	0.788808	0.797685	0.795819	0.741072	0.735053			596	0.446412	0.385493	0.424341	0.421877	0.421255	0.429882	0.399785	0.413054	0.46447	0.426004	0.48829	0.41979	0.596616	0.498527	0.488143	0.465714	0.370907	0.488766	0.473029	0.447593	0.600209
596.2	0.532223	0.534378	0.533063	0.547499	0.545297	0.570224	0.548535	0.581231	0.588513	0.607793	0.614622	0.632439	0.656067	0.630479	0.711357	0.701229	0.615048	0.59845	0.654667	0.659792	0.785161	0.794315	0.792206	0.738099	0.731842			596.2	0.444377	0.383826	0.422187	0.420082	0.419271	0.428064	0.397873	0.41115	0.462228	0.423949	0.485876	0.417806	0.593655	0.496187	0.48573	0.463536	0.369229	0.486523	0.470966	0.445496	0.597491
596.4	0.529446	0.53119	0.529739	0.544604	0.541973	0.567274	0.544792	0.578014	0.584756	0.604098	0.610408	0.628613	0.651738	0.626598	0.706678	0.696722	0.61127	0.595148	0.650923	0.655836	0.780137	0.788959	0.786895	0.733378	0.727198			596.4	0.441527	0.381162	0.419087	0.417271	0.4164	0.425081	0.394981	0.408311	0.458999	0.421118	0.482676	0.414898	0.589189	0.492607	0.482343	0.460438	0.366391	0.483118	0.467776	0.442236	0.593314
596.6	0.526892	0.528268	0.527471	0.542157	0.539416	0.56448	0.541997	0.575327	0.581743	0.601081	0.607076	0.625095	0.648442	0.623393	0.702825	0.692668	0.60796	0.591969	0.647438	0.652396	0.776124	0.784709	0.782479	0.729494	0.723801			596.6	0.439157	0.378934	0.416665	0.414861	0.414151	0.422571	0.392831	0.406078	0.456252	0.41852	0.480046	0.412562	0.585657	0.48995	0.479537	0.458033	0.364097	0.480289	0.465068	0.43946	0.589739
596.8	0.524724	0.526116	0.525581	0.540188	0.537285	0.562403	0.539472	0.573328	0.579277	0.598687	0.604586	0.622143	0.645677	0.620749	0.69977	0.689507	0.605338	0.58948	0.644983	0.649633	0.772602	0.781339	0.779167	0.726346	0.720974			596.8	0.437287	0.377076	0.414599	0.413032	0.412384	0.420681	0.391056	0.404232	0.453948	0.416451	0.477894	0.410479	0.582908	0.487664	0.477266	0.456035	0.362284	0.477948	0.462793	0.437349	0.586839
597	0.522079	0.523315	0.522897	0.537395	0.5348	0.559437	0.536913	0.570589	0.576341	0.595354	0.601301	0.618822	0.642147	0.617685	0.696316	0.685622	0.602431	0.58649	0.641472	0.646155	0.768342	0.777037	0.774501	0.722885	0.717189			597	0.434882	0.374852	0.41203	0.410766	0.410103	0.418363	0.389124	0.40193	0.451252	0.413998	0.474964	0.407862	0.579107	0.484704	0.474443	0.45318	0.360321	0.475215	0.460223	0.434886	0.583316
597.2	0.519957	0.521194	0.520937	0.535193	0.532699	0.557222	0.534875	0.568032	0.574068	0.592724	0.598687	0.616441	0.639632	0.615344	0.693464	0.682645	0.599828	0.58397	0.638657	0.643365	0.764906	0.773844	0.770942	0.720043	0.714106			597.2	0.432961	0.373127	0.410088	0.40895	0.408278	0.416487	0.387481	0.399996	0.449077	0.412003	0.472689	0.405897	0.576209	0.482414	0.47221	0.451028	0.35867	0.473024	0.458248	0.43287	0.580454
597.4	0.517166	0.517876	0.517981	0.532197	0.529654	0.554173	0.53157	0.564597	0.570775	0.589081	0.5945	0.612767	0.635138	0.61123	0.688839	0.678587	0.596138	0.580208	0.634427	0.639224	0.759568	0.7684	0.76605	0.715655	0.709945			597.4	0.430206	0.370611	0.407394	0.406088	0.405518	0.413825	0.384947	0.397156	0.4463	0.409114	0.469555	0.40313	0.57205	0.478842	0.468799	0.447826	0.355977	0.469728	0.45516	0.429807	0.576401
597.6	0.515625	0.516223	0.516411	0.530659	0.52823	0.552295	0.530093	0.562643	0.568869	0.587184	0.592705	0.611001	0.633058	0.609158	0.686657	0.67624	0.594013	0.578431	0.632475	0.637113	0.75685	0.766001	0.763785	0.713289	0.70755			597.6	0.428771	0.369321	0.405997	0.404855	0.404145	0.412427	0.38398	0.395661	0.444833	0.407692	0.467987	0.401811	0.570317	0.477016	0.467159	0.446211	0.354716	0.468017	0.453603	0.428117	0.574356
597.8	0.512327	0.513023	0.513265	0.52764	0.525325	0.548812	0.526394	0.559471	0.565198	0.583049	0.589126	0.607315	0.628988	0.605259	0.682263	0.672091	0.590434	0.573948	0.628531	0.632818	0.752248	0.760491	0.758969	0.709012	0.703048			597.8	0.425972	0.366816	0.403105	0.402438	0.401508	0.409789	0.38156	0.392406	0.441856	0.404645	0.46466	0.398791	0.565626	0.473733	0.463787	0.443046	0.352044	0.464623	0.450637	0.425189	0.570266
598	0.509403	0.510465	0.510354	0.52516	0.522762	0.545841	0.523701	0.556788	0.56256	0.57999	0.585535	0.6041	0.625367	0.601929	0.678524	0.668664	0.587376	0.570896	0.62505	0.629499	0.748153	0.756115	0.755068	0.705259	0.699265			598	0.423568	0.364442	0.400783	0.400126	0.399174	0.407511	0.379281	0.3899	0.439288	0.402288	0.461972	0.39637	0.562084	0.471136	0.461025	0.440502	0.34997	0.462046	0.447727	0.422581	0.566637
598.2	0.507327	0.508392	0.50829	0.52295	0.520782	0.543776	0.521538	0.554563	0.560367	0.5775	0.582974	0.601676	0.622528	0.599565	0.67558	0.66586	0.584847	0.568604	0.622367	0.6268	0.744864	0.752631	0.75174	0.702254	0.696138			598.2	0.421753	0.362596	0.398928	0.398172	0.39732	0.405689	0.377422	0.387958	0.437252	0.400334	0.45968	0.394564	0.559093	0.46901	0.458792	0.438467	0.348328	0.459911	0.445666	0.420537	0.563892
598.4	0.505024	0.505851	0.505687	0.520409	0.518122	0.540756	0.518843	0.551475	0.557544	0.574434	0.579711	0.598492	0.619024	0.596552	0.671923	0.661927	0.581845	0.565657	0.619197	0.623587	0.740307	0.748486	0.747339	0.698457	0.692554			598.4	0.419392	0.360387	0.396606	0.395918	0.395028	0.403464	0.375237	0.38579	0.434832	0.39795	0.456914	0.392132	0.555358	0.466351	0.455923	0.435877	0.346086	0.457293	0.442991	0.418082	0.560418
598.6	0.503333	0.503828	0.503749	0.518477	0.516062	0.538524	0.516436	0.549189	0.555426	0.571946	0.577092	0.596008	0.616143	0.594029	0.668992	0.659097	0.579526	0.563549	0.616647	0.62096	0.73698	0.745356	0.743872	0.695264	0.689502			598.6	0.417535	0.358556	0.394509	0.394289	0.393155	0.40164	0.373436	0.384104	0.432876	0.396012	0.454685	0.390216	0.552549	0.464139	0.453673	0.433784	0.344324	0.45533	0.440899	0.416116	0.557732
598.8	0.500582	0.500631	0.500834	0.515131	0.512898	0.53526	0.51299	0.545955	0.551946	0.567929	0.572754	0.591927	0.612001	0.590364	0.664982	0.654639	0.576317	0.560112	0.612677	0.617143	0.731634	0.740116	0.738998	0.690672	0.685087			598.8	0.414792	0.35577	0.391581	0.391582	0.390456	0.398823	0.370851	0.381481	0.429895	0.393066	0.45144	0.387534	0.548278	0.460872	0.450441	0.430674	0.341784	0.452182	0.437983	0.413096	0.553616
599	0.499078	0.498987	0.499155	0.513762	0.511483	0.53386	0.511504	0.544397	0.550087	0.565833	0.570923	0.590072	0.609996	0.588486	0.663115	0.65207	0.57471	0.55827	0.61087	0.615294	0.729343	0.737513	0.736263	0.688066	0.682891			599	0.413292	0.354386	0.390027	0.390145	0.389127	0.397369	0.369619	0.380216	0.428364	0.39154	0.449755	0.386268	0.546389	0.459049	0.448704	0.429163	0.340462	0.450449	0.436417	0.411503	0.55166
599.2	0.496039	0.495987	0.495987	0.510912	0.508745	0.530809	0.50822	0.541079	0.546632	0.561885	0.567231	0.585799	0.606331	0.584594	0.658926	0.647882	0.571044	0.554145	0.607315	0.611336	0.724177	0.732841	0.731176	0.68343	0.678314			599.2	0.410581	0.351546	0.387311	0.387426	0.386488	0.394583	0.367128	0.377442	0.425192	0.388702	0.446297	0.383666	0.542461	0.455878	0.445558	0.426217	0.337869	0.447396	0.4335	0.408529	0.547625
599.4	0.493647	0.493604	0.493648	0.508446	0.506178	0.527943	0.505924	0.538521	0.544001	0.558693	0.563998	0.582518	0.603054	0.581423	0.655346	0.644126	0.567988	0.550757	0.603874	0.60843	0.720282	0.728692	0.727292	0.679629	0.674624			599.4	0.408378	0.348992	0.385229	0.38503	0.384348	0.392333	0.365183	0.375051	0.422542	0.386307	0.443434	0.381292	0.53904	0.453267	0.442914	0.423671	0.335636	0.444659	0.430859	0.406091	0.54429
599.6	0.491387	0.491787	0.491829	0.506323	0.504243	0.525593	0.504069	0.536276	0.541856	0.556305	0.561551	0.579753	0.600491	0.579146	0.652493	0.641195	0.565463	0.54801	0.601279	0.605994	0.716978	0.72541	0.7241	0.676683	0.67173			599.6	0.406526	0.346921	0.383376	0.383176	0.382575	0.390595	0.363613	0.373147	0.420548	0.384359	0.441298	0.379496	0.536416	0.4513	0.440682	0.421628	0.333852	0.442495	0.428835	0.404135	0.541629
599.8	0.48893	0.488535	0.488923	0.503271	0.501346	0.522181	0.500902	0.532931	0.538281	0.552452	0.557884	0.57587	0.596279	0.575461	0.648688	0.636902	0.561945	0.54459	0.597459	0.602111	0.711541	0.720481	0.719514	0.67221	0.667146			599.8	0.404116	0.344319	0.38071	0.380621	0.379843	0.388125	0.361027	0.370402	0.41766	0.381786	0.437983	0.376635	0.532066	0.448213	0.437305	0.418602	0.331211	0.439494	0.425895	0.401415	0.537757
600	0.487619	0.487146	0.487095	0.501863	0.499912	0.520604	0.499707	0.531142	0.536759	0.550582	0.555747	0.574088	0.594475	0.573783	0.646575	0.634844	0.560046	0.542521	0.595494	0.600217	0.70935	0.717766	0.716946	0.670168	0.664758			600	0.402735	0.343024	0.379574	0.379264	0.378464	0.386887	0.359827	0.369111	0.416316	0.380499	0.436382	0.375269	0.529957	0.446477	0.435739	0.417082	0.329862	0.438211	0.424471	0.3999	0.535743
600.2	0.484583	0.484492	0.484178	0.498858	0.496848	0.517508	0.496476	0.527616	0.533083	0.547247	0.552147	0.57027	0.590529	0.570097	0.642596	0.630713	0.556304	0.538952	0.591792	0.596539	0.704395	0.712927	0.712106	0.665714	0.660672			600.2	0.399816	0.340445	0.376811	0.376642	0.375837	0.384261	0.357155	0.366184	0.413345	0.377638	0.433231	0.372592	0.525815	0.443482	0.432663	0.414351	0.327238	0.4351	0.421327	0.396787	0.531894
600.4	0.482056	0.481968	0.481653	0.496403	0.494126	0.514797	0.493598	0.525007	0.530166	0.544171	0.549043	0.566818	0.587233	0.566989	0.638999	0.626887	0.553067	0.535962	0.588661	0.593301	0.700435	0.708771	0.708259	0.661949	0.656956			600.4	0.397478	0.338167	0.374533	0.374409	0.373654	0.382084	0.354962	0.363908	0.410868	0.375168	0.430646	0.370258	0.522471	0.440978	0.430053	0.411803	0.325048	0.43256	0.418867	0.394286	0.528662
600.6	0.480042	0.479954	0.47981	0.494579	0.4921	0.512559	0.491428	0.523107	0.527791	0.54164	0.546589	0.56398	0.584701	0.564591	0.63633	0.624092	0.550365	0.533513	0.586286	0.59071	0.697654	0.705376	0.704871	0.659082	0.653807			600.6	0.395567	0.336292	0.372657	0.37274	0.371879	0.380326	0.35318	0.362015	0.40888	0.37316	0.428502	0.368288	0.519788	0.438986	0.427903	0.409772	0.323408	0.430552	0.416767	0.39237	0.525883
600.8	0.47787	0.477384	0.477102	0.492161	0.489581	0.510038	0.488597	0.520302	0.525039	0.538706	0.543705	0.560723	0.581657	0.561844	0.632992	0.62048	0.547639	0.530513	0.583237	0.587499	0.693595	0.701718	0.700881	0.655448	0.65008			600.8	0.393429	0.334226	0.370267	0.370596	0.369653	0.377978	0.350928	0.359829	0.406239	0.370888	0.425901	0.366018	0.516352	0.436365	0.425234	0.407423	0.321441	0.428058	0.414168	0.390075	0.522589
601	0.475999	0.475487	0.474991	0.490325	0.487449	0.507848	0.486487	0.518244	0.5229	0.536535	0.541357	0.557971	0.579055	0.559473	0.630309	0.617751	0.545461	0.528334	0.580756	0.584899	0.690222	0.698415	0.697722	0.652726	0.647215			601	0.391775	0.332521	0.368586	0.368736	0.36788	0.376222	0.34903	0.358066	0.404146	0.369071	0.423898	0.36417	0.513743	0.434235	0.42316	0.405553	0.319847	0.426112	0.412087	0.388206	0.519973
601.2	0.473227	0.472528	0.472336	0.487312	0.484397	0.504917	0.483451	0.515132	0.519563	0.532941	0.537573	0.553943	0.574978	0.555814	0.626339	0.613384	0.541869	0.524613	0.576951	0.581169	0.685544	0.693478	0.692808	0.648104	0.643075			601.2	0.389312	0.32985	0.365664	0.366074	0.365455	0.373711	0.346314	0.355432	0.401076	0.366138	0.420864	0.361695	0.509514	0.431106	0.420051	0.402666	0.317399	0.422748	0.409342	0.385271	0.51625
601.4	0.471504	0.471153	0.471108	0.485941	0.482851	0.503523	0.481946	0.513444	0.517922	0.531176	0.535906	0.551858	0.572884	0.553922	0.624462	0.61116	0.539764	0.52298	0.574991	0.579112	0.682902	0.690757	0.690621	0.64626	0.640967			601.4	0.388053	0.328465	0.364142	0.364854	0.364014	0.372462	0.345031	0.354064	0.399635	0.364762	0.419303	0.360183	0.507545	0.429511	0.418508	0.401272	0.31609	0.421272	0.407791	0.383892	0.514381
601.6	0.468358	0.467875	0.46824	0.482876	0.479988	0.499977	0.47878	0.510416	0.514448	0.527899	0.532449	0.548287	0.568887	0.550141	0.620604	0.606884	0.536121	0.519343	0.571107	0.575622	0.678507	0.686176	0.685379	0.642151	0.63671			601.6	0.385536	0.326	0.361525	0.362496	0.361476	0.369807	0.342372	0.351459	0.396497	0.361999	0.416296	0.357315	0.503766	0.426381	0.415428	0.398445	0.313823	0.418007	0.405138	0.38104	0.5106
601.8	0.465772	0.465386	0.465637	0.480299	0.477561	0.49738	0.47627	0.507646	0.511634	0.52527	0.529222	0.545228	0.565697	0.547193	0.617209	0.603083	0.533049	0.515847	0.568258	0.572471	0.674254	0.682221	0.681598	0.638798	0.633354			601.8	0.383339	0.324005	0.359435	0.360415	0.359469	0.367756	0.340279	0.349186	0.394196	0.359878	0.413815	0.355025	0.500552	0.423751	0.412954	0.396036	0.311776	0.415306	0.402781	0.378583	0.507538
602	0.463844	0.463236	0.46351	0.478351	0.475704	0.495437	0.474299	0.505342	0.509518	0.523162	0.526635	0.542702	0.562986	0.544717	0.614518	0.600157	0.530459	0.513307	0.565767	0.569902	0.670987	0.679102	0.678456	0.636222	0.63045			602	0.381613	0.322314	0.357773	0.358902	0.357867	0.366077	0.338495	0.347326	0.392367	0.358177	0.411789	0.353313	0.498118	0.421638	0.411016	0.394136	0.310289	0.413126	0.400853	0.376574	0.505138
602.2	0.46109	0.460745	0.460978	0.475612	0.472636	0.49206	0.470912	0.502063	0.506582	0.52003	0.522738	0.539356	0.559633	0.541114	0.610153	0.596374	0.526935	0.509968	0.562282	0.56596	0.666784	0.674588	0.673669	0.632082	0.626552			602.2	0.379177	0.319912	0.354915	0.356332	0.355334	0.363612	0.335923	0.344736	0.389699	0.355423	0.408954	0.35062	0.494034	0.418797	0.407997	0.391226	0.308008	0.410333	0.398091	0.373771	0.501408
602.4	0.459707	0.458907	0.459534	0.47399	0.471055	0.490353	0.469797	0.500271	0.505149	0.518389	0.521304	0.537512	0.557487	0.539276	0.608114	0.594454	0.525389	0.508357	0.560449	0.564141	0.664534	0.671933	0.671007	0.630041	0.624698			602.4	0.377872	0.318685	0.353422	0.355119	0.354082	0.362431	0.334583	0.343618	0.388472	0.353971	0.407559	0.34941	0.492109	0.417321	0.406426	0.389801	0.306865	0.408766	0.39673	0.372377	0.499593
602.6	0.457202	0.456155	0.456692	0.471091	0.468242	0.487052	0.466417	0.496972	0.501486	0.515129	0.518038	0.534059	0.55332	0.53565	0.604283	0.590345	0.521961	0.504635	0.557028	0.560331	0.659839	0.66731	0.665838	0.626303	0.620905			602.6	0.375327	0.316084	0.350693	0.352799	0.351431	0.359824	0.331957	0.340906	0.385908	0.351275	0.404722	0.346625	0.488171	0.414238	0.403283	0.386997	0.304424	0.406182	0.394193	0.369502	0.495943
602.8	0.454627	0.453598	0.454366	0.468791	0.465879	0.484818	0.46376	0.494041	0.499127	0.512308	0.515218	0.530731	0.550464	0.532537	0.600823	0.587005	0.519267	0.501932	0.554198	0.557301	0.656277	0.663546	0.661822	0.622838	0.617403			602.8	0.373133	0.314229	0.348609	0.350834	0.349302	0.357739	0.329653	0.338885	0.383586	0.349015	0.40231	0.344405	0.484943	0.411585	0.400785	0.384724	0.302547	0.403834	0.391743	0.367266	0.492848
603	0.452432	0.451645	0.452419	0.467016	0.463918	0.482976	0.461774	0.491674	0.497169	0.510029	0.513215	0.52833	0.547929	0.530058	0.598187	0.584489	0.516978	0.499524	0.551905	0.554916	0.653403	0.660443	0.658457	0.620328	0.614666			603	0.371358	0.312798	0.346983	0.349256	0.347713	0.356098	0.327973	0.337174	0.381888	0.347202	0.400311	0.342566	0.482447	0.40951	0.398839	0.382919	0.301235	0.402004	0.389862	0.365439	0.490331
603.2	0.449996	0.449735	0.45003	0.464409	0.461556	0.480102	0.459232	0.489017	0.494451	0.507383	0.510196	0.525369	0.544742	0.527387	0.594807	0.581138	0.513967	0.49688	0.548882	0.551889	0.649453	0.656794	0.654883	0.616785	0.611259			603.2	0.369205	0.310722	0.344835	0.347201	0.345661	0.354024	0.325934	0.335269	0.379485	0.344949	0.397978	0.340436	0.479169	0.4071	0.396259	0.380662	0.299553	0.399648	0.387557	0.363185	0.487255
603.4	0.448261	0.447975	0.448221	0.462392	0.459569	0.477946	0.457473	0.48696	0.492335	0.505001	0.507889	0.523023	0.541983	0.525108	0.59195	0.578319	0.511815	0.494804	0.546524	0.549533	0.646375	0.653694	0.652015	0.614119	0.608501			603.4	0.367567	0.309121	0.343183	0.345615	0.343969	0.352409	0.324146	0.333683	0.377597	0.343229	0.396031	0.338825	0.476765	0.405355	0.394236	0.378777	0.298178	0.397752	0.385802	0.361397	0.484678
603.6	0.445513	0.444913	0.445493	0.459644	0.456924	0.475098	0.454472	0.483905	0.489465	0.501878	0.504331	0.519503	0.53837	0.521623	0.588277	0.574385	0.508397	0.491139	0.542762	0.546079	0.642233	0.649304	0.647714	0.610169	0.604442			603.6	0.365048	0.306746	0.340762	0.343095	0.341498	0.349882	0.321519	0.3313	0.374939	0.340697	0.39322	0.336444	0.473398	0.402517	0.391142	0.376102	0.296057	0.39458	0.382952	0.358902	0.481038
603.8	0.443108	0.442539	0.443157	0.457085	0.454793	0.472413	0.452184	0.481382	0.48689	0.499334	0.501501	0.516723	0.535194	0.518714	0.584805	0.571149	0.505712	0.488928	0.539825	0.543358	0.638326	0.64554	0.644133	0.606755	0.601168			603.8	0.363055	0.304954	0.338674	0.341104	0.339634	0.347887	0.319331	0.329382	0.372711	0.338674	0.390858	0.3345	0.470281	0.400011	0.388716	0.37412	0.294115	0.391993	0.380667	0.356571	0.478124
604	0.441258	0.440966	0.441178	0.455243	0.453197	0.470442	0.45042	0.479432	0.484868	0.497231	0.499245	0.514562	0.532678	0.516313	0.582164	0.568467	0.503407	0.487011	0.537518	0.540938	0.635445	0.642651	0.641016	0.604138	0.598705			604	0.361482	0.303432	0.337095	0.339493	0.338094	0.346281	0.317626	0.327702	0.370974	0.337016	0.388941	0.332771	0.467918	0.398092	0.386837	0.372518	0.292583	0.389925	0.378835	0.354768	0.475847
604.2	0.439053	0.438744	0.438917	0.452827	0.450949	0.467909	0.447915	0.476561	0.482592	0.494446	0.496337	0.511606	0.530191	0.513538	0.579016	0.565305	0.500479	0.484274	0.534525	0.538018	0.631704	0.639088	0.63723	0.600724	0.595553			604.2	0.359359	0.301575	0.335088	0.337559	0.336119	0.344287	0.315516	0.325684	0.368875	0.334981	0.386625	0.33056	0.464933	0.395627	0.384316	0.370276	0.290925	0.3875	0.376677	0.352582	0.472965
604.4	0.437069	0.436834	0.437067	0.450796	0.449106	0.46579	0.445767	0.474359	0.480765	0.492273	0.493889	0.509297	0.528023	0.511273	0.576269	0.562605	0.497982	0.481919	0.532059	0.535651	0.628458	0.636211	0.634146	0.598109	0.59303			604.4	0.357637	0.30004	0.33349	0.33607	0.334443	0.342691	0.314025	0.324068	0.367185	0.333337	0.384736	0.328933	0.462663	0.393724	0.382289	0.368528	0.289562	0.385828	0.374929	0.350969	0.470602
604.6	0.434555	0.434148	0.434223	0.448036	0.446481	0.462446	0.442801	0.470957	0.477946	0.489263	0.49064	0.506582	0.524268	0.507713	0.572152	0.558987	0.494596	0.478878	0.52902	0.53225	0.624552	0.631898	0.62943	0.594405	0.588828			604.6	0.355011	0.297806	0.331302	0.333651	0.332049	0.340311	0.311547	0.321874	0.36466	0.330964	0.38206	0.326641	0.459526	0.390881	0.379414	0.365801	0.287563	0.382988	0.372141	0.348382	0.466942
604.8	0.433154	0.432644	0.432688	0.446696	0.445142	0.460975	0.441615	0.469436	0.476619	0.487548	0.48902	0.504625	0.522676	0.505962	0.570154	0.557002	0.49302	0.476779	0.527446	0.530387	0.622448	0.629672	0.627284	0.592193	0.586665			604.8	0.353788	0.296759	0.33011	0.332612	0.330955	0.339016	0.310263	0.3207	0.363342	0.329646	0.380739	0.325528	0.457797	0.389463	0.378016	0.364546	0.286349	0.38179	0.37081	0.347106	0.465165
605	0.430492	0.429843	0.430092	0.443925	0.442296	0.458144	0.438878	0.466382	0.4735	0.48424	0.485662	0.500974	0.519162	0.502334	0.566402	0.553326	0.489527	0.474067	0.523859	0.526806	0.618015	0.624513	0.623351	0.588248	0.582845			605	0.351311	0.294478	0.327554	0.330307	0.328608	0.336564	0.307923	0.318394	0.36082	0.3272	0.377874	0.323201	0.454307	0.386675	0.375314	0.361862	0.284434	0.379315	0.368047	0.344508	0.461653
605.2	0.428196	0.427414	0.427954	0.441838	0.439966	0.455607	0.436707	0.46379	0.470882	0.481746	0.48321	0.498149	0.516182	0.499908	0.563219	0.549974	0.486928	0.471284	0.520889	0.523982	0.614524	0.620839	0.61979	0.58486	0.579646			605.2	0.349296	0.292542	0.32565	0.328244	0.326629	0.334683	0.305909	0.316466	0.358621	0.325127	0.375598	0.321195	0.451273	0.384381	0.372913	0.359677	0.282841	0.377015	0.365915	0.342568	0.458545
605.4	0.426362	0.425395	0.42618	0.440029	0.438147	0.453707	0.43519	0.461759	0.468851	0.479598	0.481248	0.495818	0.513674	0.49782	0.560651	0.547325	0.484638	0.469214	0.51848	0.521617	0.611738	0.618008	0.616697	0.582224	0.576972			605.4	0.347706	0.290957	0.324009	0.326615	0.325102	0.333192	0.304373	0.314939	0.356848	0.323461	0.373804	0.319405	0.448854	0.382472	0.371138	0.358001	0.281558	0.375261	0.364022	0.341047	0.456198
605.6	0.423656	0.422915	0.423643	0.437371	0.435641	0.450494	0.431873	0.458926	0.465735	0.476371	0.477879	0.49263	0.510036	0.49462	0.557126	0.543495	0.480935	0.465993	0.515075	0.518373	0.607526	0.613423	0.612083	0.578469	0.57282			605.6	0.345288	0.288824	0.322048	0.32429	0.322773	0.330779	0.302111	0.312528	0.354175	0.321206	0.371033	0.31701	0.445417	0.379905	0.368313	0.355336	0.279736	0.372438	0.361366	0.338609	0.452777
605.8	0.422123	0.421421	0.422312	0.435754	0.434275	0.449207	0.430366	0.45736	0.464236	0.474723	0.475972	0.49064	0.508285	0.492877	0.555194	0.541764	0.479155	0.464498	0.513313	0.516679	0.605025	0.611032	0.61047	0.576361	0.570529			605.8	0.344021	0.287806	0.321098	0.323007	0.32173	0.329677	0.30093	0.311466	0.352811	0.319978	0.369571	0.315829	0.443656	0.378544	0.367002	0.354033	0.27877	0.370925	0.360025	0.337376	0.450938
606	0.419587	0.418759	0.419289	0.433224	0.431513	0.446364	0.427712	0.454459	0.461472	0.471803	0.473033	0.487531	0.504818	0.48986	0.551504	0.537959	0.475754	0.461392	0.509903	0.513118	0.600846	0.606337	0.606108	0.572136	0.566375			606	0.341713	0.285624	0.318877	0.320891	0.319508	0.327399	0.298648	0.309152	0.350199	0.317575	0.366923	0.313405	0.44026	0.375839	0.364297	0.351542	0.276811	0.368227	0.357418	0.334965	0.447633
606.2	0.417538	0.416359	0.416806	0.430738	0.429211	0.443731	0.425387	0.452121	0.458808	0.469149	0.470117	0.484597	0.50196	0.48721	0.548467	0.534672	0.473175	0.458999	0.506871	0.510037	0.597075	0.602341	0.60277	0.569223	0.56323			606.2	0.339683	0.283735	0.316988	0.319014	0.317592	0.325377	0.296718	0.307062	0.347948	0.315643	0.364635	0.311406	0.437254	0.373544	0.362067	0.349502	0.275057	0.365867	0.355258	0.332764	0.444877
606.4	0.415849	0.414517	0.414944	0.428908	0.427299	0.44161	0.423622	0.450394	0.456717	0.46698	0.467964	0.482204	0.499564	0.485061	0.545957	0.531876	0.470938	0.456776	0.50467	0.507447	0.594314	0.599402	0.599914	0.56682	0.560727			606.4	0.33808	0.282328	0.315632	0.317499	0.316083	0.323906	0.295009	0.305619	0.346155	0.314209	0.362845	0.309884	0.434983	0.371833	0.360248	0.347813	0.273761	0.363965	0.353611	0.331081	0.44261
606.6	0.412943	0.411737	0.412339	0.426245	0.424806	0.438294	0.420808	0.447123	0.453925	0.464186	0.464936	0.478995	0.496603	0.481685	0.542537	0.528308	0.467554	0.453596	0.50112	0.50383	0.589741	0.595108	0.595429	0.562757	0.556645			606.6	0.335699	0.280039	0.313162	0.315074	0.313939	0.321567	0.292697	0.303263	0.343556	0.311846	0.360129	0.307268	0.43148	0.36871	0.35741	0.34525	0.271672	0.361374	0.350942	0.328572	0.439476
606.8	0.411873	0.41041	0.410857	0.424888	0.423592	0.436562	0.419273	0.445548	0.452437	0.462701	0.463214	0.477421	0.4948	0.479933	0.540627	0.526527	0.466035	0.452224	0.499402	0.502087	0.58714	0.593075	0.592955	0.560915	0.55469			606.8	0.33458	0.279012	0.312106	0.3141	0.312815	0.320423	0.291512	0.302346	0.342243	0.310765	0.358759	0.305905	0.429708	0.367377	0.356115	0.343936	0.270771	0.3601	0.34967	0.327291	0.437803
607	0.409333	0.407698	0.407914	0.422194	0.420932	0.433714	0.416411	0.442142	0.449615	0.459435	0.460537	0.474067	0.491819	0.476778	0.53707	0.522564	0.462896	0.44905	0.495578	0.498591	0.582993	0.588373	0.588475	0.557093	0.550828			607	0.332246	0.276805	0.309855	0.311858	0.310509	0.318112	0.289278	0.300076	0.339622	0.308368	0.355969	0.303377	0.425973	0.3647	0.35342	0.341204	0.268735	0.357271	0.347088	0.324818	0.43449
607.2	0.407075	0.405268	0.405871	0.41984	0.418512	0.431084	0.414107	0.439876	0.447178	0.456934	0.457832	0.470908	0.488928	0.473994	0.533828	0.519503	0.460318	0.446435	0.492564	0.495961	0.579432	0.584469	0.585233	0.55384	0.547659			607.2	0.330158	0.275063	0.308049	0.309925	0.308659	0.316181	0.287379	0.298109	0.337637	0.306428	0.353744	0.301302	0.423287	0.362524	0.351092	0.338918	0.26696	0.355205	0.345029	0.322722	0.43163
607.4	0.405304	0.403483	0.404104	0.418106	0.416711	0.428993	0.411862	0.438103	0.445167	0.455032	0.456007	0.468798	0.486514	0.471805	0.531253	0.517307	0.458146	0.444585	0.490271	0.493871	0.57662	0.581753	0.582589	0.551187	0.545025			607.4	0.328549	0.27353	0.306409	0.308489	0.307156	0.314609	0.285949	0.296525	0.336026	0.304855	0.351944	0.299916	0.421009	0.360814	0.349257	0.337179	0.265629	0.353651	0.343347	0.321071	0.429466
607.6	0.403192	0.401254	0.401954	0.416058	0.414634	0.426576	0.409645	0.435985	0.442561	0.452588	0.45341	0.46611	0.483621	0.469131	0.52843	0.514241	0.455488	0.441817	0.487597	0.491028	0.57346	0.578183	0.578953	0.548313	0.541864			607.6	0.326647	0.271842	0.304371	0.306601	0.305349	0.31271	0.284176	0.294727	0.333938	0.30289	0.349698	0.298166	0.418252	0.358533	0.347124	0.335022	0.263979	0.351352	0.341128	0.318926	0.426751
607.8	0.4013	0.399342	0.400116	0.414209	0.412879	0.424587	0.407831	0.434259	0.440306	0.450587	0.451509	0.463925	0.481184	0.467123	0.526137	0.511662	0.453447	0.43971	0.485404	0.488722	0.570498	0.575524	0.576148	0.545857	0.53946			607.8	0.325134	0.270356	0.302825	0.305086	0.303853	0.311203	0.282671	0.293272	0.332296	0.30138	0.347922	0.296723	0.41594	0.356691	0.34546	0.333392	0.262571	0.349486	0.339428	0.317224	0.424581
608	0.398639	0.396966	0.397571	0.411367	0.410079	0.421735	0.404762	0.431421	0.436988	0.447718	0.4483	0.460307	0.47777	0.464333	0.522321	0.507805	0.450349	0.43652	0.481896	0.485377	0.566296	0.571362	0.57215	0.541925	0.535756			608	0.322788	0.267955	0.300478	0.302839	0.30166	0.30892	0.280376	0.290986	0.330003	0.29915	0.345089	0.294378	0.412624	0.354063	0.342787	0.33094	0.26045	0.346756	0.33699	0.314796	0.42126
608.2	0.397536	0.395681	0.396192	0.41002	0.408794	0.420131	0.403417	0.42988	0.435718	0.446265	0.4469	0.458877	0.476142	0.462719	0.520368	0.505441	0.448551	0.434929	0.480297	0.483753	0.564415	0.569551	0.570066	0.539953	0.533788			608.2	0.32158	0.266882	0.299384	0.301658	0.300427	0.307855	0.279173	0.28993	0.328796	0.298107	0.343805	0.293111	0.410791	0.352791	0.341351	0.329704	0.259509	0.345248	0.335785	0.313568	0.4197
608.4	0.394677	0.393269	0.393141	0.40736	0.406263	0.417342	0.400772	0.427174	0.43267	0.44324	0.443667	0.45577	0.472928	0.45918	0.516982	0.502009	0.44588	0.431975	0.47691	0.480296	0.560307	0.565597	0.56546	0.536339	0.529977			608.4	0.319335	0.264849	0.297181	0.299471	0.298315	0.305585	0.277064	0.287602	0.326264	0.295671	0.34118	0.290776	0.40763	0.350352	0.338668	0.327404	0.257237	0.342618	0.333371	0.311251	0.416548
608.6	0.39258	0.391252	0.39096	0.405155	0.404009	0.414824	0.398362	0.424526	0.429869	0.440591	0.440787	0.452932	0.470154	0.456314	0.514055	0.499046	0.443196	0.429295	0.47457	0.477693	0.55675	0.562215	0.562162	0.533478	0.527084			608.6	0.317387	0.263296	0.295469	0.297744	0.296566	0.303702	0.275089	0.285885	0.324255	0.293841	0.339123	0.288922	0.404967	0.348247	0.336446	0.32546	0.255502	0.340374	0.331397	0.309174	0.413983
608.8	0.390914	0.38955	0.389101	0.403272	0.402192	0.412995	0.396567	0.422649	0.42773	0.438395	0.438433	0.450736	0.467576	0.454072	0.511587	0.496585	0.44132	0.427229	0.472604	0.475461	0.554011	0.559595	0.559675	0.530911	0.524598			608.8	0.315827	0.262096	0.294077	0.296389	0.295101	0.302174	0.273529	0.284433	0.322517	0.292277	0.337442	0.287333	0.402838	0.346646	0.334691	0.323926	0.254253	0.338678	0.329879	0.307492	0.411909
609	0.388196	0.387004	0.386311	0.400787	0.399596	0.410275	0.393927	0.419897	0.424665	0.435325	0.435512	0.447526	0.464482	0.450989	0.507989	0.492534	0.438412	0.424181	0.46942	0.472245	0.549889	0.555675	0.55504	0.527359	0.52104			609	0.313569	0.259902	0.291691	0.294283	0.292896	0.29995	0.271315	0.282061	0.320225	0.290093	0.334969	0.285256	0.399311	0.344011	0.331987	0.321505	0.252023	0.33589	0.327323	0.305123	0.408856
609.2	0.386903	0.385861	0.38506	0.399445	0.398251	0.408938	0.392492	0.4184	0.423247	0.433856	0.433846	0.445672	0.462871	0.449437	0.506299	0.490908	0.437111	0.422796	0.467705	0.470646	0.547559	0.55376	0.553311	0.525647	0.519348			609.2	0.31242	0.258942	0.290703	0.293001	0.291802	0.298856	0.270115	0.281	0.319172	0.288994	0.333743	0.284166	0.397547	0.342834	0.33077	0.320294	0.251013	0.334562	0.326073	0.303942	0.407173
609.4	0.384535	0.383191	0.382602	0.397022	0.395565	0.406202	0.390122	0.415322	0.420316	0.430814	0.430414	0.442498	0.459435	0.446175	0.502856	0.487247	0.43383	0.419769	0.464369	0.4678	0.5435	0.549956	0.549214	0.521727	0.516011			609.4	0.310218	0.256911	0.28852	0.290809	0.289616	0.296662	0.267807	0.278992	0.316963	0.286857	0.331138	0.281827	0.394522	0.340329	0.328138	0.317693	0.249254	0.331865	0.323784	0.301683	0.404035
609.6	0.382506	0.381012	0.380764	0.394856	0.393354	0.403789	0.387679	0.41321	0.418105	0.428372	0.428081	0.44	0.456875	0.443518	0.500061	0.484554	0.431304	0.417484	0.461332	0.465388	0.540239	0.546646	0.545683	0.518822	0.512749			609.6	0.308269	0.255298	0.286631	0.289118	0.287807	0.294906	0.265925	0.277317	0.315059	0.284876	0.329004	0.280092	0.39206	0.33818	0.326113	0.315644	0.247454	0.329456	0.321726	0.299818	0.401284
609.8	0.380832	0.37926	0.378917	0.393033	0.391559	0.402071	0.385632	0.41133	0.416213	0.426421	0.425892	0.437781	0.45468	0.44138	0.497732	0.48253	0.429469	0.415506	0.458949	0.463368	0.537871	0.543615	0.543028	0.516565	0.510479			609.8	0.306831	0.253921	0.28506	0.287883	0.286382	0.293487	0.264328	0.27596	0.31347	0.283371	0.327381	0.278757	0.3899	0.336482	0.324466	0.314038	0.246175	0.327577	0.320015	0.298295	0.399209
610	0.377957	0.37668	0.376226	0.390531	0.388713	0.399407	0.382876	0.408687	0.413422	0.423134	0.422957	0.434388	0.451573	0.438543	0.494325	0.478912	0.426454	0.412224	0.455765	0.460108	0.534309	0.539857	0.539557	0.51283	0.506928			610	0.304688	0.251913	0.283207	0.285708	0.284212	0.291199	0.262256	0.273603	0.311085	0.281062	0.324943	0.276657	0.387003	0.333986	0.322107	0.311532	0.244117	0.324854	0.317641	0.29612	0.396271
610.2	0.376455	0.375564	0.375066	0.389137	0.3874	0.398254	0.381729	0.407513	0.411948	0.421615	0.421212	0.432836	0.44976	0.43687	0.492749	0.477367	0.424865	0.410773	0.454457	0.45844	0.53214	0.537884	0.537499	0.511305	0.504999			610.2	0.303458	0.250937	0.282188	0.284767	0.28321	0.290172	0.261195	0.27239	0.310005	0.280033	0.323755	0.275664	0.385762	0.332783	0.320796	0.31036	0.243127	0.323612	0.316448	0.295005	0.39459
610.4	0.373947	0.373178	0.372653	0.386465	0.38495	0.395601	0.378764	0.404561	0.409051	0.418642	0.418166	0.430037	0.44649	0.433772	0.489301	0.474381	0.422127	0.407757	0.45134	0.45551	0.528154	0.534345	0.533487	0.507893	0.501433			610.4	0.301491	0.248811	0.280128	0.282817	0.280919	0.288034	0.259043	0.270471	0.307527	0.277832	0.321209	0.273602	0.382799	0.330167	0.3185	0.308043	0.241395	0.321493	0.314065	0.292722	0.391543
610.6	0.37183	0.37107	0.370493	0.384249	0.382708	0.393329	0.376663	0.401813	0.406467	0.416178	0.415424	0.427433	0.443857	0.431128	0.486393	0.471121	0.419521	0.40495	0.448797	0.452781	0.52434	0.530926	0.530202	0.504618	0.498528			610.6	0.299598	0.247003	0.278538	0.281145	0.279156	0.2863	0.257365	0.268871	0.305467	0.276085	0.31911	0.271683	0.380558	0.327985	0.316524	0.306096	0.239859	0.319095	0.312048	0.290844	0.388921
610.8	0.370085	0.369391	0.368777	0.382369	0.380949	0.391667	0.374913	0.399816	0.404517	0.4142	0.413143	0.425231	0.441671	0.429046	0.484178	0.468678	0.417728	0.402959	0.446694	0.450627	0.521207	0.528286	0.527594	0.502081	0.496114			610.8	0.298088	0.245604	0.277363	0.279742	0.277742	0.284899	0.255967	0.26748	0.303822	0.274635	0.317492	0.270069	0.378561	0.326434	0.314836	0.304498	0.238676	0.317108	0.310361	0.28937	0.386716
611	0.367527	0.367304	0.366566	0.379835	0.378266	0.389214	0.37276	0.396869	0.401933	0.411127	0.409698	0.422313	0.438551	0.425778	0.480711	0.465583	0.41454	0.400185	0.443673	0.447624	0.517641	0.524177	0.524117	0.498471	0.492436			611	0.295937	0.243636	0.275369	0.277736	0.275682	0.282669	0.25382	0.265429	0.301469	0.272456	0.315027	0.267957	0.375413	0.323866	0.312373	0.302195	0.236772	0.314847	0.308241	0.28719	0.383742
611.2	0.366495	0.366115	0.365403	0.378637	0.377086	0.387706	0.371701	0.395314	0.400459	0.409861	0.408301	0.42088	0.436958	0.424131	0.479056	0.463759	0.413194	0.398764	0.442086	0.446005	0.515472	0.522161	0.52211	0.496622	0.490726			611.2	0.294831	0.24262	0.274427	0.276629	0.274683	0.281521	0.252944	0.264363	0.300187	0.271366	0.313843	0.266839	0.374056	0.322728	0.311143	0.301111	0.235855	0.313598	0.307053	0.286139	0.382236
611.4	0.363844	0.363627	0.36332	0.376441	0.374593	0.38541	0.369335	0.392462	0.397675	0.406818	0.404958	0.417762	0.433751	0.420823	0.476029	0.460936	0.410394	0.395826	0.43886	0.44292	0.511188	0.518506	0.517938	0.493392	0.487348			611.4	0.29273	0.240762	0.272234	0.274622	0.272595	0.279602	0.250895	0.262198	0.297816	0.269173	0.311393	0.264643	0.371177	0.320345	0.308775	0.298775	0.233948	0.310984	0.304712	0.283856	0.379402
611.6	0.361724	0.361646	0.361463	0.374165	0.37255	0.383361	0.366963	0.390245	0.395393	0.404561	0.402501	0.414889	0.430999	0.418532	0.473181	0.457991	0.407741	0.393206	0.436366	0.440353	0.508208	0.515517	0.514885	0.490476	0.484276			611.6	0.290882	0.238985	0.270472	0.272927	0.270926	0.27791	0.248993	0.260504	0.295909	0.267361	0.309425	0.262883	0.368726	0.318053	0.306836	0.296719	0.232476	0.308892	0.302831	0.281994	0.376986
611.8	0.359979	0.360056	0.359871	0.372462	0.370835	0.381753	0.364946	0.388756	0.393495	0.402697	0.400717	0.412593	0.428916	0.416778	0.470965	0.45581	0.405713	0.391389	0.434171	0.438297	0.505453	0.512985	0.512505	0.487966	0.481885			611.8	0.289503	0.237717	0.269099	0.271432	0.269614	0.276554	0.247604	0.259106	0.29438	0.265947	0.307792	0.26146	0.366611	0.316497	0.305182	0.295067	0.231354	0.307138	0.301366	0.280513	0.375004
612	0.357098	0.357295	0.357048	0.369857	0.368503	0.379183	0.362453	0.386255	0.390784	0.400001	0.397677	0.409755	0.42621	0.414225	0.467702	0.452887	0.402686	0.388666	0.430555	0.435319	0.501647	0.509278	0.508911	0.484511	0.478315			612	0.28748	0.2357	0.267216	0.269434	0.267786	0.274465	0.245643	0.256902	0.292282	0.264116	0.305332	0.259584	0.363737	0.313911	0.302672	0.29277	0.229566	0.304561	0.299073	0.278185	0.372006
612.2	0.356177	0.355905	0.35573	0.368603	0.367288	0.37785	0.361239	0.384909	0.389482	0.39867	0.396002	0.408336	0.424592	0.4127	0.46598	0.451372	0.401362	0.387235	0.429037	0.433697	0.499798	0.507404	0.507103	0.482753	0.476705			612.2	0.28643	0.234807	0.266262	0.26852	0.266812	0.273483	0.244658	0.255952	0.291011	0.263136	0.304127	0.258418	0.362359	0.312736	0.301528	0.291724	0.228727	0.303297	0.297907	0.277215	0.370486
612.4	0.353526	0.353343	0.353246	0.366146	0.364846	0.375326	0.358806	0.382436	0.386689	0.395921	0.393079	0.405571	0.421322	0.409926	0.462692	0.448464	0.398234	0.3842	0.426188	0.430596	0.495955	0.503618	0.503194	0.479186	0.47359			612.4	0.284335	0.232942	0.264389	0.266658	0.264743	0.271376	0.242838	0.253986	0.288474	0.261023	0.301752	0.25632	0.359718	0.309966	0.299185	0.289612	0.22699	0.300616	0.295607	0.275064	0.367684
612.6	0.351432	0.351495	0.351211	0.364013	0.362833	0.373011	0.356607	0.380267	0.38436	0.393521	0.390717	0.403245	0.418632	0.407444	0.459961	0.445686	0.396159	0.381804	0.423789	0.427904	0.493077	0.500307	0.500131	0.476266	0.470821			612.6	0.282565	0.231423	0.26284	0.265158	0.26313	0.269668	0.241285	0.252299	0.286588	0.259224	0.299866	0.254739	0.357343	0.308038	0.297252	0.287757	0.225502	0.298607	0.293624	0.273263	0.365175
612.8	0.34968	0.350136	0.349585	0.362407	0.361238	0.371166	0.355135	0.378297	0.382237	0.391603	0.388925	0.401112	0.416527	0.405499	0.457871	0.443383	0.394349	0.379775	0.421963	0.425868	0.490707	0.497793	0.497639	0.474167	0.468735			612.8	0.281218	0.230265	0.261612	0.263822	0.261756	0.268245	0.240059	0.250846	0.28505	0.257823	0.298359	0.253433	0.355418	0.306509	0.295678	0.286296	0.224368	0.297087	0.292113	0.271846	0.363306
613	0.347244	0.347996	0.346995	0.360073	0.358658	0.36858	0.352471	0.375738	0.379439	0.388714	0.38604	0.398139	0.413157	0.402524	0.45469	0.439476	0.391355	0.377189	0.419336	0.42284	0.48701	0.494327	0.493917	0.470405	0.465163			613	0.279113	0.228477	0.259749	0.261814	0.259746	0.266179	0.238436	0.248775	0.283013	0.255694	0.295966	0.25149	0.352523	0.304239	0.293449	0.28415	0.222444	0.294504	0.289988	0.269644	0.360407
613.2	0.346083	0.346774	0.346061	0.358966	0.357441	0.367439	0.351526	0.374412	0.377956	0.387428	0.384698	0.396757	0.411574	0.401022	0.452887	0.437753	0.390174	0.37585	0.417697	0.421222	0.485154	0.492448	0.491831	0.468668	0.46351			613.2	0.278013	0.227607	0.258733	0.260869	0.258809	0.265148	0.23742	0.247825	0.281909	0.254726	0.294778	0.250427	0.351058	0.303095	0.292238	0.28312	0.221571	0.293348	0.288855	0.268593	0.358873
613.4	0.343843	0.344575	0.343518	0.356437	0.354914	0.365091	0.348854	0.3718	0.375155	0.385047	0.381984	0.394167	0.40835	0.398154	0.449577	0.434724	0.387343	0.372816	0.41478	0.418398	0.481899	0.488709	0.488495	0.465044	0.460278			613.4	0.275968	0.225656	0.25651	0.258862	0.256858	0.263143	0.23556	0.245851	0.279883	0.252712	0.292545	0.248635	0.348089	0.300651	0.289982	0.280983	0.219948	0.291069	0.286805	0.266284	0.356019
613.6	0.342396	0.343511	0.342291	0.355297	0.35363	0.363825	0.347675	0.370553	0.373674	0.383689	0.380486	0.392612	0.407005	0.396845	0.447957	0.433245	0.385825	0.371328	0.413371	0.416809	0.479832	0.486771	0.486555	0.463267	0.458584			613.6	0.274875	0.224778	0.255496	0.257723	0.256018	0.262145	0.234688	0.244945	0.27894	0.251716	0.291402	0.247805	0.346591	0.299642	0.288728	0.27996	0.218944	0.289774	0.2857	0.265263	0.354546
613.8	0.340088	0.340931	0.339929	0.352912	0.351322	0.361447	0.345657	0.368178	0.371259	0.380983	0.37791	0.389218	0.404052	0.394168	0.444986	0.430243	0.383201	0.368863	0.41049	0.413608	0.47681	0.482988	0.482715	0.460331	0.455323			613.8	0.272921	0.223157	0.253413	0.255579	0.254193	0.26023	0.232765	0.242801	0.276683	0.249722	0.289128	0.245918	0.343412	0.297423	0.28641	0.277705	0.217338	0.287208	0.283484	0.263321	0.351639
614	0.338479	0.3393	0.338306	0.351288	0.349564	0.359584	0.344157	0.366426	0.36946	0.379099	0.376078	0.387287	0.402094	0.392319	0.442867	0.428046	0.38117	0.366991	0.408407	0.41159	0.474562	0.480616	0.480315	0.458304	0.453085			614	0.271628	0.221985	0.25199	0.254329	0.252878	0.258945	0.231367	0.241631	0.275311	0.248435	0.287573	0.244668	0.34151	0.295889	0.285025	0.276269	0.216186	0.285555	0.282202	0.261931	0.349935
614.2	0.336412	0.337218	0.336152	0.349346	0.347517	0.357135	0.342038	0.364382	0.367199	0.376727	0.373847	0.38494	0.400016	0.390223	0.440221	0.42526	0.379003	0.364347	0.405753	0.409106	0.47169	0.477727	0.477004	0.455514	0.450185			614.2	0.270012	0.220522	0.250401	0.252669	0.251274	0.257299	0.22972	0.240055	0.273508	0.246863	0.285639	0.243027	0.339029	0.294172	0.283231	0.274526	0.214723	0.283729	0.280493	0.260176	0.347657
614.4	0.333999	0.334614	0.333556	0.34694	0.345313	0.354554	0.339124	0.361978	0.364698	0.373891	0.371102	0.382211	0.396871	0.387819	0.437239	0.421617	0.376107	0.361836	0.40304	0.406088	0.467829	0.473624	0.473348	0.452115	0.447156			614.4	0.267958	0.218737	0.248328	0.250948	0.249521	0.255428	0.227905	0.2381	0.27167	0.244839	0.283419	0.240957	0.336044	0.291822	0.281132	0.272385	0.213079	0.281284	0.278148	0.257983	0.344937
614.6	0.33283	0.333331	0.332243	0.345744	0.344033	0.353202	0.337853	0.36067	0.363433	0.372547	0.36977	0.381015	0.395306	0.386476	0.435729	0.420028	0.374826	0.360603	0.401536	0.40453	0.466114	0.471878	0.471449	0.450397	0.44553			614.6	0.266975	0.217861	0.247582	0.250015	0.248554	0.254432	0.227035	0.237241	0.270529	0.243855	0.282282	0.240184	0.334762	0.290601	0.280006	0.271265	0.212251	0.280185	0.277124	0.256998	0.343457
614.8	0.33046	0.331073	0.329866	0.343427	0.341882	0.350577	0.335156	0.35816	0.361056	0.36985	0.366997	0.378381	0.392406	0.383791	0.432288	0.41713	0.372193	0.357722	0.398639	0.401531	0.462122	0.468167	0.468257	0.447134	0.442429			614.8	0.264965	0.216234	0.245658	0.248197	0.246605	0.252452	0.225326	0.235531	0.268639	0.241872	0.280143	0.238438	0.331826	0.288443	0.277772	0.269096	0.210702	0.27797	0.274975	0.254997	0.340629
615	0.329076	0.329248	0.3284	0.341777	0.340259	0.348926	0.333655	0.356378	0.359392	0.368077	0.365204	0.376582	0.390552	0.381931	0.430213	0.415163	0.37035	0.355974	0.396763	0.399676	0.459989	0.465562	0.465833	0.445056	0.440399			615	0.263631	0.215117	0.244426	0.246983	0.245306	0.251142	0.22406	0.234257	0.267332	0.240598	0.278778	0.237196	0.330168	0.286861	0.276385	0.267762	0.209491	0.276501	0.273509	0.25363	0.338763
615.2	0.327195	0.327385	0.32674	0.339819	0.338249	0.346593	0.331635	0.354002	0.357487	0.365907	0.362943	0.374382	0.388572	0.379484	0.427511	0.412627	0.368279	0.353765	0.394676	0.397231	0.457206	0.462455	0.462809	0.442351	0.437825			615.2	0.261982	0.213729	0.242795	0.245507	0.243682	0.249466	0.222612	0.232835	0.265542	0.238913	0.277015	0.235602	0.327829	0.284944	0.274686	0.266	0.207972	0.274517	0.271698	0.251992	0.336592
615.4	0.32506	0.325226	0.324413	0.337505	0.335827	0.344313	0.329215	0.351302	0.354715	0.36345	0.360391	0.371323	0.385805	0.376617	0.424324	0.40925	0.365161	0.35094	0.391682	0.394168	0.453572	0.458997	0.459231	0.439278	0.434803			615.4	0.259984	0.211989	0.240879	0.243321	0.241783	0.247502	0.220737	0.230765	0.2636	0.236886	0.275004	0.2337	0.324945	0.282805	0.272507	0.26372	0.206327	0.272354	0.269398	0.250083	0.333874
615.6	0.323986	0.324043	0.3232	0.336356	0.334601	0.343069	0.328144	0.349726	0.353259	0.362125	0.359233	0.37012	0.384227	0.375243	0.422824	0.407647	0.363653	0.349722	0.390167	0.392717	0.452018	0.457162	0.457525	0.43763	0.433028			615.6	0.259026	0.211217	0.240009	0.242387	0.240941	0.246592	0.219889	0.229846	0.26269	0.235945	0.274018	0.23281	0.323623	0.281683	0.27136	0.262621	0.205458	0.271422	0.268498	0.249024	0.332487
615.8	0.321745	0.321675	0.320994	0.334061	0.332345	0.340212	0.325838	0.347294	0.350753	0.359442	0.356951	0.367105	0.381853	0.372703	0.419594	0.404354	0.360958	0.347112	0.387142	0.390014	0.448771	0.453876	0.453995	0.434542	0.42981			615.8	0.257086	0.209611	0.238016	0.240423	0.238957	0.244635	0.217922	0.22797	0.26045	0.234111	0.271811	0.231086	0.320718	0.279387	0.269207	0.260515	0.203872	0.269035	0.266502	0.247096	0.329778
616	0.320281	0.31991	0.319376	0.332585	0.33081	0.338722	0.324244	0.345597	0.349101	0.357701	0.354881	0.365378	0.380153	0.371025	0.41759	0.402421	0.359075	0.345308	0.385135	0.388074	0.446089	0.451624	0.451643	0.432259	0.427593			616	0.255814	0.208492	0.236692	0.239133	0.237787	0.24345	0.216833	0.226706	0.259138	0.232881	0.27043	0.229798	0.318837	0.277941	0.267721	0.259246	0.202752	0.267401	0.265198	0.245656	0.32802
616.2	0.318437	0.317979	0.317528	0.330777	0.328866	0.336695	0.322347	0.343722	0.347134	0.355595	0.352529	0.363025	0.378043	0.368704	0.415091	0.400065	0.356676	0.343066	0.382718	0.385619	0.443106	0.448798	0.449002	0.429532	0.425046			616.2	0.254244	0.207086	0.235232	0.23755	0.236261	0.241865	0.215376	0.225091	0.257273	0.231395	0.268707	0.228278	0.316552	0.276029	0.265978	0.257509	0.201509	0.265647	0.263533	0.243899	0.32579
616.4	0.316345	0.315596	0.31506	0.328482	0.326766	0.334301	0.32021	0.341025	0.344488	0.353122	0.349785	0.360334	0.375175	0.366072	0.412024	0.39705	0.354273	0.340248	0.379871	0.382747	0.439892	0.445363	0.445545	0.426298	0.421831			616.4	0.252426	0.205445	0.233461	0.235768	0.234444	0.240052	0.21355	0.223036	0.255281	0.229526	0.266692	0.226586	0.314081	0.27375	0.263824	0.255565	0.199752	0.263492	0.261649	0.241966	0.323234
616.6	0.315453	0.314354	0.314048	0.327491	0.325611	0.332848	0.318918	0.339589	0.34321	0.351693	0.348423	0.359118	0.373745	0.364878	0.410286	0.395471	0.353017	0.339034	0.378509	0.381385	0.438311	0.443576	0.443688	0.424891	0.420126			616.6	0.251467	0.204652	0.232677	0.234862	0.233551	0.239092	0.212621	0.222028	0.254293	0.228631	0.265538	0.22567	0.312807	0.272649	0.262786	0.254562	0.198943	0.26228	0.260576	0.241024	0.321893
616.8	0.313268	0.311798	0.311865	0.325447	0.323568	0.330434	0.316564	0.337449	0.34082	0.349103	0.345457	0.356161	0.370948	0.362293	0.407418	0.39223	0.350228	0.336594	0.375733	0.378517	0.434556	0.440022	0.439959	0.421565	0.417032			616.8	0.249467	0.202993	0.231144	0.233077	0.23166	0.237269	0.210733	0.220318	0.252158	0.226822	0.263412	0.22365	0.310248	0.270473	0.260769	0.252525	0.197223	0.260003	0.258436	0.239132	0.319475
617	0.311691	0.310337	0.31038	0.324074	0.322048	0.328753	0.314844	0.335709	0.339215	0.347351	0.343638	0.35457	0.369004	0.360442	0.405419	0.390301	0.348393	0.334973	0.37398	0.376923	0.432209	0.437812	0.437758	0.419297	0.414965			617	0.248191	0.201913	0.230011	0.231976	0.230417	0.236095	0.209671	0.219263	0.250798	0.225563	0.262063	0.222374	0.30869	0.269016	0.259342	0.251255	0.196077	0.258573	0.257181	0.237764	0.317753
617.2	0.310083	0.30878	0.308675	0.322291	0.320288	0.326972	0.312775	0.333469	0.337285	0.345309	0.341513	0.352728	0.366516	0.35821	0.403068	0.388079	0.346247	0.332777	0.371607	0.374831	0.42962	0.434955	0.435058	0.416405	0.412372			617.2	0.246672	0.200568	0.228529	0.230565	0.22886	0.234654	0.208183	0.217969	0.249062	0.224017	0.260361	0.220852	0.306574	0.267215	0.257542	0.249726	0.194681	0.256784	0.255542	0.236043	0.315588
617.4	0.308088	0.306504	0.306564	0.319957	0.31822	0.324862	0.310534	0.330784	0.334548	0.343145	0.338963	0.349942	0.36344	0.355592	0.400043	0.38496	0.343687	0.330507	0.369132	0.37214	0.426257	0.43185	0.431951	0.413372	0.409607			617.4	0.244742	0.199002	0.226767	0.228679	0.227032	0.23285	0.206502	0.215961	0.247234	0.22219	0.258397	0.219214	0.304056	0.264977	0.255383	0.247693	0.193024	0.254414	0.253364	0.234178	0.313018
617.6	0.307002	0.305323	0.305588	0.318853	0.317028	0.323797	0.309363	0.329542	0.333381	0.341872	0.337949	0.348614	0.361964	0.354254	0.398516	0.383749	0.342808	0.329163	0.367719	0.370981	0.424692	0.430088	0.430481	0.411917	0.407856			617.6	0.243842	0.198298	0.225986	0.227691	0.226165	0.231899	0.205588	0.215151	0.24615	0.221401	0.257351	0.218305	0.302861	0.263856	0.254329	0.246648	0.192347	0.25332	0.252354	0.23334	0.311691
617.8	0.304747	0.303298	0.303464	0.316597	0.314756	0.321226	0.30716	0.327411	0.330805	0.339478	0.335467	0.345521	0.359558	0.351679	0.395687	0.380937	0.340468	0.326747	0.364928	0.368363	0.421436	0.426919	0.427271	0.408758	0.404728			617.8	0.241964	0.196842	0.224339	0.225845	0.224434	0.229986	0.203997	0.21338	0.2444	0.219658	0.255355	0.216539	0.300381	0.261931	0.252251	0.244681	0.19078	0.251013	0.250361	0.231533	0.309174
618	0.303291	0.301757	0.302012	0.31521	0.313106	0.319512	0.305861	0.325775	0.328933	0.337668	0.334004	0.34383	0.357748	0.349952	0.393901	0.378767	0.338902	0.325126	0.363078	0.366663	0.419469	0.424616	0.425013	0.40652	0.402596			618	0.240708	0.195883	0.223204	0.224675	0.22329	0.228787	0.202693	0.212222	0.243017	0.218519	0.253957	0.21527	0.298793	0.260596	0.250797	0.243465	0.189812	0.249534	0.248984	0.230321	0.307427
618.2	0.301589	0.300013	0.300124	0.313404	0.311184	0.317248	0.304116	0.323745	0.326645	0.33552	0.331758	0.341639	0.35556	0.347976	0.391515	0.376117	0.336821	0.323265	0.360837	0.364422	0.416663	0.422164	0.422387	0.403891	0.399978			618.2	0.239153	0.194713	0.221834	0.223201	0.2218	0.227331	0.201257	0.210799	0.241354	0.217106	0.252265	0.21386	0.296616	0.258871	0.249026	0.241836	0.188531	0.247689	0.247232	0.228744	0.305269
618.4	0.299442	0.297982	0.297948	0.31112	0.309046	0.315003	0.301634	0.32166	0.324275	0.33314	0.329514	0.339022	0.352564	0.345432	0.388533	0.373257	0.334236	0.320845	0.358308	0.36183	0.413481	0.418784	0.419326	0.401052	0.397187			618.4	0.237242	0.193128	0.220185	0.221506	0.220065	0.225635	0.199561	0.208917	0.239484	0.21536	0.250201	0.211988	0.294418	0.256764	0.246858	0.239954	0.186898	0.245733	0.245174	0.226784	0.302556
618.6	0.298347	0.297081	0.297019	0.309936	0.308038	0.313793	0.300503	0.320576	0.323075	0.331829	0.32818	0.337673	0.351046	0.343996	0.38714	0.371737	0.333079	0.319989	0.356979	0.36059	0.411616	0.417175	0.417883	0.399374	0.395675			618.6	0.236348	0.192341	0.21924	0.220804	0.219137	0.224833	0.198662	0.2081	0.238619	0.214516	0.249194	0.211039	0.293258	0.255699	0.245863	0.239028	0.186097	0.244672	0.244325	0.225856	0.301288
618.8	0.295909	0.294905	0.294977	0.307653	0.305869	0.311578	0.298362	0.318165	0.320961	0.329324	0.32581	0.33524	0.34847	0.341341	0.384272	0.368846	0.330922	0.317533	0.354324	0.357935	0.408286	0.413721	0.414696	0.396437	0.392659			618.8	0.234519	0.190889	0.217373	0.219226	0.217295	0.223129	0.196839	0.206543	0.236692	0.212797	0.247142	0.209295	0.290896	0.253591	0.243997	0.237315	0.184365	0.242518	0.242434	0.22405	0.298812
619	0.294475	0.293521	0.293727	0.30618	0.304371	0.31017	0.29688	0.316827	0.319374	0.327848	0.323909	0.333507	0.346743	0.339595	0.382382	0.367012	0.329185	0.315913	0.352708	0.356087	0.406005	0.411369	0.412727	0.394361	0.390512			619	0.233353	0.189985	0.216294	0.218111	0.216245	0.222008	0.195693	0.205314	0.235467	0.21161	0.245721	0.207982	0.28922	0.252251	0.242775	0.236006	0.183269	0.24124	0.241093	0.222867	0.297231
619.2	0.292609	0.291896	0.291889	0.304298	0.302486	0.308303	0.295092	0.315011	0.317487	0.325936	0.32189	0.331143	0.344615	0.33732	0.379849	0.3648	0.327279	0.314016	0.35067	0.353827	0.403175	0.408338	0.41016	0.391982	0.388075			619.2	0.231839	0.188748	0.214888	0.216789	0.214863	0.220562	0.194263	0.204002	0.233945	0.210123	0.243999	0.206575	0.287275	0.250505	0.241242	0.23433	0.181854	0.239596	0.239489	0.221413	0.295174
619.4	0.290339	0.289663	0.289713	0.302049	0.300434	0.305991	0.293347	0.312846	0.315087	0.323456	0.319655	0.328879	0.34217	0.334829	0.376861	0.362084	0.325005	0.311786	0.348054	0.351495	0.400222	0.405335	0.406829	0.38919	0.385086			619.4	0.22992	0.187338	0.212889	0.215144	0.213227	0.218891	0.192471	0.202264	0.232232	0.208397	0.242172	0.204652	0.28483	0.248583	0.23923	0.232477	0.180067	0.237513	0.237415	0.219701	0.292854
619.6	0.289289	0.288758	0.288751	0.300912	0.299455	0.304868	0.292146	0.311709	0.314074	0.322282	0.31841	0.327613	0.340771	0.333669	0.375464	0.360686	0.323815	0.31064	0.346816	0.35034	0.398383	0.403791	0.404949	0.387765	0.383715			619.6	0.228974	0.186642	0.211951	0.214223	0.212399	0.218109	0.191598	0.201314	0.231233	0.20756	0.241207	0.20376	0.283443	0.247726	0.238264	0.23149	0.179444	0.236551	0.236416	0.218784	0.291581
619.8	0.287117	0.286763	0.286756	0.298821	0.297386	0.302439	0.29048	0.309694	0.3115	0.319849	0.315993	0.325334	0.338358	0.331297	0.372985	0.358021	0.321473	0.308238	0.344385	0.347696	0.395398	0.400847	0.401758	0.384798	0.38103			619.8	0.227258	0.185221	0.210098	0.212465	0.210721	0.216495	0.189868	0.199962	0.22934	0.205879	0.239378	0.201873	0.280826	0.245828	0.236246	0.22959	0.177961	0.234643	0.234469	0.217101	0.289216
620	0.285774	0.285412	0.285407	0.297356	0.295881	0.300786	0.289254	0.308199	0.309938	0.318341	0.314551	0.323935	0.336655	0.329539	0.37103	0.356116	0.319993	0.306769	0.342765	0.346093	0.393289	0.398924	0.39982	0.383012	0.379172			620	0.226126	0.18424	0.208921	0.21138	0.209684	0.215391	0.188996	0.198781	0.228184	0.204726	0.238092	0.200759	0.279115	0.244488	0.234952	0.228388	0.176898	0.23329	0.233222	0.215918	0.287599
620.2	0.284011	0.283927	0.283632	0.295373	0.294128	0.298912	0.287654	0.306338	0.308015	0.316364	0.312726	0.321993	0.334423	0.327276	0.368541	0.353498	0.318195	0.304863	0.340664	0.343966	0.390734	0.396334	0.397217	0.380892	0.376785			620.2	0.224672	0.183037	0.20739	0.210031	0.208441	0.213901	0.187673	0.19725	0.226731	0.20345	0.236507	0.19934	0.277008	0.242897	0.233295	0.226866	0.175574	0.231717	0.231579	0.214457	0.285647
620.4	0.281721	0.28147	0.281614	0.293354	0.291899	0.296583	0.285801	0.304208	0.305588	0.313887	0.3104	0.319228	0.3323	0.325121	0.365822	0.350477	0.315726	0.302628	0.338256	0.341352	0.387669	0.393085	0.394259	0.37822	0.374075			620.4	0.22285	0.181704	0.205857	0.208314	0.206916	0.212243	0.185926	0.195252	0.225033	0.20165	0.234505	0.197627	0.274566	0.240836	0.231368	0.22503	0.174065	0.22986	0.229831	0.212851	0.283313
620.6	0.280702	0.280406	0.280572	0.292273	0.290774	0.295268	0.284651	0.303248	0.304465	0.312707	0.309136	0.318128	0.33111	0.323961	0.3645	0.349291	0.314494	0.301605	0.337053	0.340146	0.386165	0.391401	0.392854	0.376911	0.372465			620.6	0.222036	0.181125	0.205062	0.207472	0.206127	0.211488	0.185055	0.194478	0.224179	0.200828	0.233541	0.196695	0.273222	0.239857	0.230432	0.224152	0.173189	0.228871	0.228818	0.212042	0.282157
620.8	0.278823	0.278476	0.278266	0.290249	0.288607	0.293055	0.282451	0.301227	0.302044	0.310464	0.306168	0.315196	0.328676	0.321411	0.361701	0.346538	0.312102	0.299392	0.334513	0.337474	0.382973	0.388561	0.389834	0.374105	0.369591			620.8	0.220285	0.179549	0.203426	0.205882	0.204442	0.20993	0.183223	0.192869	0.22218	0.199159	0.231631	0.195002	0.270987	0.237925	0.228548	0.22237	0.171646	0.227181	0.226975	0.210213	0.279836
621	0.277483	0.277077	0.276817	0.288921	0.287214	0.291785	0.280913	0.299866	0.300736	0.308968	0.304472	0.313576	0.32695	0.319914	0.359857	0.344729	0.310247	0.297876	0.332887	0.335783	0.381005	0.38655	0.387985	0.372416	0.367767			621	0.2192	0.178571	0.20238	0.204837	0.203416	0.208942	0.182087	0.191878	0.220887	0.198026	0.230443	0.193833	0.26935	0.236658	0.227236	0.221259	0.170614	0.226011	0.22582	0.209064	0.278295
621.2	0.275901	0.275378	0.275169	0.287121	0.28545	0.29009	0.279179	0.297926	0.299124	0.307275	0.302346	0.311297	0.325004	0.318076	0.357596	0.342534	0.307996	0.296304	0.330855	0.333533	0.378612	0.383731	0.385521	0.370256	0.365501			621.2	0.217808	0.177338	0.201071	0.203397	0.20213	0.20765	0.1808	0.190531	0.219506	0.196669	0.228951	0.192584	0.267272	0.235023	0.225653	0.219733	0.169073	0.224407	0.224353	0.20752	0.27644
621.4	0.273813	0.273372	0.27356	0.28534	0.28358	0.288143	0.277419	0.295942	0.296986	0.305212	0.300043	0.309074	0.322449	0.315458	0.354951	0.340092	0.305837	0.293892	0.328519	0.330807	0.375588	0.380774	0.382259	0.367503	0.362934			621.4	0.216097	0.175867	0.199414	0.201903	0.200586	0.206016	0.179303	0.188795	0.217654	0.195073	0.227033	0.190896	0.265056	0.233097	0.223952	0.218025	0.167563	0.222633	0.222641	0.205859	0.274112
621.6	0.272091	0.271594	0.27193	0.283616	0.281991	0.286463	0.275708	0.293839	0.295061	0.303304	0.29822	0.307166	0.320493	0.313451	0.352822	0.338118	0.303893	0.292065	0.326382	0.328832	0.373083	0.378326	0.3795	0.365338	0.360548			621.6	0.214765	0.174659	0.197984	0.200538	0.199309	0.204723	0.17807	0.187521	0.216163	0.19376	0.22553	0.189626	0.262969	0.231504	0.222422	0.216577	0.16639	0.221165	0.221242	0.204451	0.272265
621.8	0.270678	0.270117	0.270481	0.282339	0.280703	0.284946	0.274374	0.292163	0.293608	0.301839	0.296804	0.305816	0.31868	0.311933	0.351039	0.336344	0.302312	0.290467	0.32477	0.327227	0.37134	0.37641	0.377296	0.363542	0.358794			621.8	0.213663	0.173692	0.196878	0.199364	0.198293	0.203732	0.177102	0.186518	0.214983	0.192722	0.224297	0.18873	0.261442	0.230281	0.221216	0.215367	0.165387	0.220015	0.220112	0.203353	0.270686
622	0.268881	0.268123	0.268337	0.280415	0.278713	0.282718	0.272272	0.290139	0.291477	0.299525	0.29434	0.303425	0.316095	0.309518	0.348595	0.333777	0.299869	0.288547	0.322199	0.324719	0.368245	0.373634	0.374263	0.360817	0.356356			622	0.211995	0.172011	0.195292	0.197756	0.196741	0.202086	0.175639	0.185194	0.213261	0.191034	0.222474	0.187	0.259162	0.228534	0.219298	0.213578	0.163833	0.217871	0.218261	0.201581	0.268451
622.2	0.26809	0.267235	0.267311	0.279476	0.277649	0.281689	0.271328	0.288944	0.290314	0.298203	0.29334	0.302277	0.314781	0.3083	0.347121	0.332521	0.298929	0.287557	0.320979	0.32361	0.366935	0.372153	0.372753	0.35947	0.355222			622.2	0.211149	0.171107	0.194459	0.196935	0.19597	0.201378	0.174965	0.184383	0.212514	0.190235	0.221675	0.186171	0.257921	0.227598	0.218352	0.212784	0.163104	0.216952	0.217391	0.200676	0.267376
622.4	0.266354	0.265298	0.265418	0.277512	0.275672	0.279595	0.269025	0.286592	0.288016	0.295894	0.290973	0.299923	0.312218	0.306116	0.344685	0.329812	0.296629	0.285097	0.318331	0.32113	0.36423	0.369479	0.369787	0.356772	0.352396			622.4	0.209502	0.169407	0.192855	0.195253	0.194443	0.199777	0.173375	0.182997	0.210796	0.188785	0.219891	0.184556	0.255665	0.225699	0.216501	0.211065	0.161553	0.214937	0.215778	0.199065	0.265187
622.6	0.264836	0.263568	0.263691	0.275882	0.273979	0.277931	0.267154	0.28459	0.286169	0.294177	0.289098	0.298215	0.309924	0.304334	0.342374	0.327678	0.29495	0.283308	0.316427	0.319036	0.36163	0.366997	0.367415	0.354243	0.350129			622.6	0.208208	0.168063	0.191681	0.193991	0.193107	0.198415	0.172135	0.181856	0.209317	0.187463	0.218273	0.1833	0.25385	0.224071	0.215034	0.209597	0.160339	0.213455	0.214309	0.197725	0.263347
622.8	0.263502	0.26221	0.262415	0.27446	0.272608	0.276624	0.265655	0.283054	0.284667	0.292582	0.287611	0.296601	0.30808	0.302757	0.340652	0.325988	0.293485	0.281968	0.31488	0.317316	0.359705	0.365033	0.365692	0.352353	0.348429			622.8	0.207153	0.167041	0.190703	0.192954	0.192055	0.197304	0.171148	0.180881	0.208184	0.186423	0.216997	0.182185	0.252295	0.22277	0.21389	0.208484	0.159402	0.212238	0.21313	0.196686	0.261862
623	0.261501	0.260064	0.260541	0.272358	0.270403	0.274598	0.263422	0.28082	0.282669	0.290487	0.285413	0.294126	0.306041	0.300177	0.337736	0.323371	0.290766	0.28005	0.312569	0.314756	0.356477	0.361955	0.362862	0.349791	0.345616			623	0.205502	0.165512	0.189088	0.191565	0.190529	0.195738	0.169691	0.179146	0.206421	0.184904	0.215199	0.180661	0.250267	0.221007	0.212174	0.206787	0.157922	0.210396	0.211404	0.194925	0.259711
623.2	0.26048	0.259204	0.259432	0.271303	0.269422	0.273437	0.262195	0.279379	0.281719	0.289331	0.284185	0.292824	0.304666	0.299179	0.336518	0.322358	0.289459	0.2787	0.311265	0.313418	0.355027	0.360492	0.361307	0.34824	0.344184			623.2	0.20465	0.1648	0.188388	0.190765	0.189638	0.194925	0.168719	0.17835	0.205551	0.184116	0.214357	0.179837	0.249339	0.220055	0.211232	0.205949	0.15717	0.209615	0.210517	0.194232	0.258605
623.4	0.258402	0.257091	0.257661	0.26933	0.267556	0.271541	0.260429	0.277294	0.279403	0.287157	0.281967	0.290569	0.302331	0.297088	0.334074	0.320009	0.287549	0.276384	0.308871	0.310762	0.352148	0.35769	0.358187	0.345249	0.341614			623.4	0.203037	0.163462	0.186882	0.18918	0.18806	0.193352	0.167243	0.176815	0.203935	0.182554	0.21261	0.178302	0.247036	0.218352	0.209416	0.204269	0.155865	0.207793	0.208968	0.192613	0.256491
623.6	0.256805	0.255669	0.256062	0.267686	0.265911	0.269781	0.258535	0.27564	0.277559	0.285484	0.280184	0.289004	0.300026	0.294949	0.331957	0.317868	0.285681	0.274507	0.306988	0.308774	0.349744	0.355434	0.355403	0.342978	0.339415			623.6	0.201789	0.162071	0.18565	0.187875	0.186772	0.192008	0.16613	0.175761	0.202554	0.181308	0.211204	0.177012	0.245298	0.216935	0.207923	0.202807	0.154619	0.206398	0.207652	0.191254	0.254639
623.8	0.255703	0.254502	0.25474	0.266401	0.264607	0.268397	0.257136	0.274026	0.276148	0.284114	0.278747	0.287629	0.298175	0.293261	0.330284	0.316153	0.284313	0.272927	0.305508	0.307096	0.347807	0.353577	0.353302	0.340979	0.337727			623.8	0.200705	0.160989	0.184686	0.186802	0.185788	0.191004	0.165201	0.174898	0.201384	0.180378	0.210081	0.176015	0.24397	0.215812	0.206753	0.201648	0.153679	0.205285	0.206552	0.190128	0.253259
624	0.253636	0.25246	0.253097	0.264358	0.26257	0.266535	0.255159	0.271738	0.274139	0.281778	0.276971	0.285688	0.295755	0.290899	0.327712	0.313879	0.281999	0.270707	0.303399	0.304873	0.345061	0.350775	0.350709	0.338368	0.335333			624	0.199049	0.159604	0.183173	0.185263	0.184362	0.189478	0.163973	0.173517	0.199859	0.178768	0.208363	0.174555	0.241895	0.213975	0.20502	0.199981	0.152254	0.20324	0.204909	0.188526	0.251106
624.2	0.252642	0.251454	0.252168	0.263382	0.261652	0.265425	0.25428	0.270696	0.272909	0.280716	0.275837	0.284663	0.294814	0.289817	0.326395	0.312544	0.281026	0.26972	0.302322	0.303714	0.343492	0.349364	0.349362	0.336979	0.333921			624.2	0.198254	0.158857	0.182322	0.184503	0.183608	0.188598	0.163248	0.172781	0.199034	0.178095	0.207537	0.173756	0.240736	0.213066	0.20423	0.199113	0.151565	0.202324	0.204103	0.187763	0.249977
624.4	0.250811	0.249636	0.250306	0.261385	0.259807	0.263368	0.252121	0.268726	0.270778	0.278145	0.273727	0.282917	0.292367	0.287558	0.323602	0.310096	0.279216	0.267425	0.300178	0.301537	0.340493	0.346746	0.346623	0.334086	0.331426			624.4	0.19682	0.157387	0.180601	0.183031	0.182048	0.187098	0.161782	0.17131	0.197394	0.176563	0.205678	0.172072	0.238837	0.211169	0.202669	0.197529	0.150229	0.200664	0.202426	0.186253	0.247985
624.6	0.249322	0.248035	0.248554	0.259704	0.258095	0.261538	0.250486	0.267139	0.269195	0.276105	0.271794	0.281056	0.290576	0.285694	0.321369	0.308042	0.277362	0.265523	0.298174	0.299512	0.338319	0.344353	0.344482	0.331903	0.329086			624.6	0.195492	0.156125	0.17947	0.181859	0.180784	0.185819	0.160593	0.170096	0.195986	0.175309	0.204286	0.170806	0.23686	0.209675	0.201264	0.196164	0.149152	0.199137	0.201081	0.184993	0.246337
624.8	0.24807	0.246944	0.247268	0.258475	0.256783	0.260168	0.2493	0.265722	0.267944	0.274617	0.270322	0.279483	0.289112	0.284104	0.319738	0.305903	0.27602	0.264127	0.296759	0.297812	0.336662	0.342448	0.342786	0.330071	0.327344			624.8	0.194362	0.155228	0.178589	0.180809	0.179842	0.184801	0.159672	0.169119	0.194954	0.174322	0.203242	0.169821	0.235399	0.208539	0.200108	0.195081	0.148207	0.197933	0.199979	0.18394	0.244993
625	0.24619	0.24521	0.245444	0.256529	0.254817	0.258306	0.247524	0.263945	0.265749	0.272485	0.267696	0.277255	0.28691	0.281929	0.317125	0.303274	0.273947	0.261871	0.294385	0.295378	0.33388	0.339825	0.340399	0.327484	0.324757			625	0.192871	0.153855	0.177168	0.179366	0.178427	0.183253	0.15815	0.167828	0.19336	0.172833	0.201535	0.16823	0.233215	0.206759	0.198351	0.193568	0.146957	0.196192	0.198238	0.182428	0.242981
625.2	0.245176	0.244257	0.24452	0.255644	0.253779	0.257427	0.246282	0.262867	0.264848	0.271467	0.266493	0.276095	0.285929	0.280895	0.315851	0.301953	0.27281	0.260798	0.293439	0.294152	0.332512	0.338395	0.339123	0.326354	0.323448			625.2	0.192094	0.153259	0.176401	0.178679	0.177801	0.182571	0.157478	0.166912	0.192517	0.172053	0.200741	0.167556	0.232254	0.205847	0.197608	0.192819	0.146333	0.195476	0.197365	0.181642	0.241911
625.4	0.243459	0.242442	0.242768	0.253664	0.252007	0.255163	0.244477	0.260609	0.262783	0.269646	0.264865	0.274028	0.283618	0.278952	0.313345	0.299307	0.27081	0.258403	0.291229	0.291873	0.329816	0.335797	0.336411	0.323857	0.320542			625.4	0.19064	0.151833	0.175026	0.177244	0.176406	0.18109	0.155951	0.165261	0.190916	0.170669	0.199115	0.16618	0.23014	0.204301	0.195911	0.191097	0.144993	0.194135	0.195922	0.180163	0.239826
625.6	0.242292	0.241315	0.24146	0.252366	0.250773	0.25375	0.243306	0.259256	0.261506	0.268242	0.263399	0.272778	0.282196	0.27741	0.311629	0.297754	0.269465	0.257141	0.289765	0.290426	0.328094	0.334004	0.334664	0.322099	0.319018			625.6	0.189638	0.150949	0.174095	0.176374	0.175359	0.180142	0.15524	0.164172	0.189771	0.169678	0.198074	0.165328	0.228818	0.203214	0.194847	0.190068	0.144226	0.193188	0.194829	0.179161	0.238442
625.8	0.240658	0.239831	0.239873	0.250549	0.249229	0.252098	0.241499	0.257546	0.259875	0.266484	0.261467	0.270692	0.280511	0.27555	0.309627	0.295685	0.267548	0.255273	0.287929	0.288589	0.326233	0.331698	0.332599	0.320096	0.31707			625.8	0.188355	0.14981	0.172905	0.175288	0.174141	0.178921	0.154297	0.162892	0.188383	0.168531	0.19671	0.164084	0.227171	0.201923	0.193543	0.188768	0.143304	0.191872	0.193449	0.177909	0.236749
626	0.238941	0.238049	0.238015	0.248823	0.247235	0.250098	0.239764	0.255798	0.257954	0.264529	0.259239	0.26841	0.278459	0.2733	0.307273	0.293457	0.265362	0.253035	0.28554	0.286383	0.323638	0.328683	0.329693	0.317748	0.314458			626	0.18676	0.148544	0.171549	0.173908	0.172767	0.177469	0.152899	0.161524	0.186794	0.167124	0.195126	0.162723	0.225237	0.200249	0.191806	0.187054	0.14198	0.190316	0.191977	0.176342	0.234638
626.2	0.238048	0.237205	0.237006	0.247871	0.246356	0.249319	0.238823	0.254888	0.256978	0.263472	0.258266	0.267505	0.277323	0.272195	0.305972	0.292311	0.264344	0.251955	0.284309	0.285335	0.322334	0.327072	0.328389	0.316336	0.313371			626.2	0.186039	0.147844	0.170993	0.173094	0.172073	0.176752	0.152117	0.160905	0.185982	0.166433	0.194293	0.162112	0.224274	0.199357	0.191046	0.186224	0.141406	0.189585	0.191196	0.175677	0.233629
626.4	0.236478	0.235191	0.235204	0.24617	0.244613	0.247365	0.237141	0.252907	0.254803	0.261463	0.256048	0.265143	0.275024	0.269996	0.303607	0.28973	0.262391	0.249891	0.28199	0.28333	0.319892	0.32446	0.325688	0.313943	0.310707			626.4	0.184595	0.146584	0.169672	0.171741	0.170753	0.175354	0.150996	0.159535	0.184429	0.165123	0.192667	0.160671	0.222155	0.197607	0.189429	0.184691	0.140172	0.187924	0.189734	0.17423	0.231509
626.6	0.235513	0.233915	0.233956	0.244862	0.24343	0.245981	0.235761	0.251648	0.253613	0.26019	0.254668	0.263634	0.273555	0.268501	0.301891	0.288012	0.260867	0.248699	0.280564	0.281934	0.318273	0.322701	0.324226	0.312235	0.308936			626.6	0.183642	0.145683	0.168705	0.170827	0.169833	0.174534	0.150075	0.158803	0.183399	0.164165	0.191568	0.159765	0.221051	0.196433	0.188392	0.183674	0.139346	0.18689	0.188671	0.173258	0.230114
626.8	0.234091	0.232434	0.232353	0.2434	0.242012	0.244209	0.234263	0.25014	0.252145	0.258486	0.252855	0.261712	0.271999	0.266769	0.299829	0.286072	0.259068	0.247249	0.278784	0.280129	0.31621	0.320564	0.322272	0.310206	0.306757			626.8	0.182404	0.144645	0.167474	0.169626	0.168724	0.173427	0.148982	0.157711	0.182056	0.162992	0.190201	0.158663	0.219539	0.194998	0.187105	0.182367	0.138402	0.185488	0.18738	0.17199	0.228429
627	0.23205	0.230394	0.230635	0.241532	0.240229	0.242326	0.232683	0.24845	0.250131	0.256247	0.251051	0.259171	0.270045	0.264664	0.297408	0.283768	0.256904	0.24518	0.276242	0.277888	0.313596	0.318049	0.319844	0.307725	0.304446			627	0.180928	0.143409	0.165928	0.168342	0.167339	0.171955	0.147667	0.15619	0.180561	0.16153	0.188698	0.157236	0.217493	0.193391	0.185532	0.180857	0.137289	0.184059	0.185802	0.170557	0.226454
627.2	0.23114	0.229482	0.229736	0.240585	0.239382	0.241387	0.231791	0.247707	0.249036	0.255376	0.249947	0.258033	0.268775	0.263646	0.296239	0.282573	0.255905	0.244123	0.274906	0.27675	0.312136	0.316793	0.31844	0.306589	0.303161			627.2	0.1803	0.142862	0.16518	0.16769	0.166727	0.171274	0.147046	0.155472	0.179909	0.160885	0.187941	0.156496	0.216505	0.192547	0.184848	0.180141	0.136706	0.183194	0.185131	0.169823	0.225454
627.4	0.229623	0.227939	0.227765	0.238721	0.237622	0.239662	0.229927	0.245867	0.247084	0.253399	0.248049	0.255927	0.266537	0.261639	0.294076	0.280296	0.25362	0.242054	0.272641	0.274612	0.309904	0.313929	0.315544	0.304066	0.300524			627.4	0.178793	0.141447	0.163879	0.166374	0.165269	0.169822	0.145538	0.153991	0.178329	0.159469	0.186287	0.155095	0.214614	0.190954	0.183159	0.178569	0.135523	0.181663	0.183674	0.168348	0.223549
627.6	0.227733	0.226052	0.226044	0.2369	0.235869	0.23796	0.228296	0.243828	0.245113	0.251677	0.246188	0.253651	0.264305	0.259368	0.291854	0.278122	0.251532	0.240009	0.270313	0.272465	0.307864	0.311334	0.312792	0.301675	0.298128			627.6	0.177256	0.140283	0.162688	0.165026	0.163889	0.168427	0.144345	0.152635	0.17687	0.158073	0.184651	0.153749	0.212658	0.189482	0.181471	0.177037	0.1345	0.180006	0.182112	0.166882	0.221598
627.8	0.226872	0.225275	0.225096	0.235933	0.235105	0.237068	0.227268	0.24262	0.244017	0.250691	0.24528	0.252485	0.263242	0.258223	0.290847	0.27685	0.25038	0.23899	0.269286	0.271404	0.306636	0.309852	0.311453	0.300368	0.296855			627.8	0.176529	0.139789	0.162092	0.164347	0.163334	0.167822	0.143704	0.152133	0.176207	0.15738	0.183847	0.152986	0.211846	0.188736	0.180642	0.176308	0.13391	0.179287	0.18137	0.16615	0.220578
628	0.225227	0.223402	0.223192	0.234023	0.23332	0.235418	0.225456	0.240696	0.242012	0.248814	0.243314	0.250674	0.261082	0.256364	0.288565	0.274968	0.248224	0.237075	0.266932	0.269598	0.304033	0.307513	0.308872	0.298018	0.294501			628	0.175223	0.138397	0.160719	0.162985	0.161875	0.166472	0.142492	0.150966	0.174675	0.156066	0.182155	0.151508	0.210019	0.187106	0.179144	0.174814	0.132868	0.177726	0.179758	0.164808	0.218633
628.2	0.223755	0.221862	0.221794	0.232459	0.231923	0.23383	0.223949	0.239055	0.240364	0.247012	0.241903	0.248666	0.259185	0.254828	0.286853	0.273311	0.246767	0.23538	0.265173	0.267784	0.301792	0.305417	0.306559	0.296018	0.292417			628.2	0.17398	0.137435	0.159619	0.161844	0.160737	0.165343	0.141543	0.149748	0.173543	0.154987	0.180857	0.150289	0.208516	0.185884	0.17788	0.173491	0.13197	0.176435	0.178497	0.163657	0.217198
628.4	0.222622	0.220641	0.220799	0.231116	0.23078	0.232468	0.222818	0.238035	0.23917	0.245709	0.240609	0.247241	0.257682	0.253469	0.285387	0.272091	0.245609	0.234089	0.26376	0.266393	0.300224	0.30389	0.304812	0.294326	0.290706			628.4	0.173068	0.136599	0.158814	0.160958	0.159726	0.164449	0.140722	0.148868	0.172589	0.154162	0.179779	0.14935	0.207307	0.184997	0.176818	0.172442	0.131298	0.17543	0.177576	0.162758	0.216026
628.6	0.220699	0.218993	0.219009	0.229435	0.228895	0.23094	0.220878	0.236386	0.237357	0.243675	0.238405	0.245293	0.255698	0.251457	0.28313	0.27019	0.243605	0.232312	0.261508	0.26418	0.29748	0.30131	0.30208	0.291781	0.288369			628.6	0.171586	0.135584	0.157585	0.159602	0.158361	0.163158	0.139506	0.147943	0.171285	0.152795	0.178132	0.14796	0.20544	0.18337	0.175241	0.1711	0.130221	0.173832	0.176034	0.161375	0.214141
628.8	0.219727	0.218079	0.218344	0.228613	0.227947	0.230001	0.22012	0.235511	0.236491	0.242837	0.237573	0.24422	0.254686	0.250577	0.282048	0.269016	0.242464	0.231282	0.260725	0.262964	0.296098	0.300174	0.300758	0.290695	0.287161			628.8	0.170875	0.135069	0.156976	0.158951	0.15771	0.162483	0.138659	0.14742	0.170626	0.15214	0.177367	0.147264	0.204615	0.182606	0.174474	0.170353	0.129587	0.173069	0.175328	0.160692	0.213278
629	0.21825	0.216391	0.216746	0.227005	0.226147	0.228466	0.218531	0.233445	0.234535	0.240909	0.23576	0.242351	0.252493	0.248518	0.279889	0.266976	0.240481	0.229638	0.258411	0.261059	0.29368	0.297905	0.29848	0.288358	0.284839			629	0.169522	0.133982	0.155635	0.157441	0.156421	0.161182	0.137351	0.146254	0.169218	0.150791	0.175852	0.146029	0.202894	0.180928	0.172957	0.16885	0.128493	0.171378	0.173735	0.159368	0.211625
629.2	0.217034	0.215259	0.215739	0.225782	0.225086	0.227395	0.217265	0.232086	0.233308	0.239695	0.234564	0.241004	0.251042	0.247261	0.278329	0.26531	0.239436	0.228376	0.256918	0.259607	0.292095	0.296427	0.297088	0.286827	0.283311			629.2	0.168604	0.133134	0.154716	0.156584	0.155525	0.160329	0.136572	0.145456	0.168299	0.149945	0.174851	0.145204	0.20175	0.179874	0.172014	0.167973	0.127769	0.170388	0.172813	0.158488	0.210489
629.4	0.21558	0.213988	0.214375	0.224215	0.223724	0.225987	0.215606	0.230518	0.23173	0.23819	0.232987	0.239084	0.24928	0.245785	0.27655	0.263333	0.238052	0.226837	0.255294	0.257863	0.290231	0.294359	0.295147	0.285039	0.281484			629.4	0.167491	0.132165	0.153573	0.155551	0.154433	0.159139	0.135701	0.144478	0.167174	0.148889	0.173614	0.144111	0.200364	0.178608	0.170813	0.166804	0.126898	0.169058	0.171636	0.157313	0.209001
629.6	0.213835	0.212687	0.212784	0.222327	0.221839	0.224444	0.213798	0.228762	0.230065	0.236127	0.23115	0.237224	0.247002	0.243895	0.274431	0.261374	0.236178	0.225272	0.2533	0.25587	0.287914	0.292195	0.292924	0.28274	0.279327			629.6	0.166111	0.131015	0.152189	0.154276	0.153192	0.15791	0.134313	0.143344	0.165802	0.147581	0.17213	0.142833	0.198432	0.177248	0.169424	0.165416	0.125744	0.167787	0.170031	0.155935	0.207347
629.8	0.213127	0.212051	0.211833	0.221523	0.220843	0.223578	0.21297	0.227761	0.229298	0.235123	0.230242	0.236282	0.246036	0.243047	0.273295	0.260341	0.235421	0.224415	0.252361	0.254836	0.286609	0.291055	0.29162	0.281724	0.27824			629.8	0.165494	0.130487	0.151547	0.153674	0.152556	0.157214	0.133596	0.142592	0.165033	0.146987	0.171415	0.142068	0.197333	0.176539	0.168726	0.16476	0.125185	0.167102	0.169188	0.155279	0.206451
630	0.211343	0.210183	0.210153	0.219868	0.219206	0.222188	0.211119	0.225989	0.227569	0.23329	0.228368	0.234285	0.244059	0.241316	0.271007	0.258239	0.23357	0.222389	0.250448	0.252705	0.284127	0.288691	0.289108	0.279526	0.276143			630	0.164158	0.129354	0.15047	0.152503	0.151223	0.155903	0.132361	0.141183	0.163665	0.145814	0.170002	0.140812	0.195305	0.17496	0.16725	0.163461	0.123993	0.165794	0.167662	0.154014	0.204752
630.2	0.210327	0.209222	0.209214	0.218696	0.218064	0.221179	0.209846	0.224614	0.22645	0.232084	0.227007	0.233223	0.242814	0.240064	0.269548	0.256887	0.232298	0.221075	0.249115	0.251521	0.282514	0.287264	0.287446	0.27821	0.27463			630.2	0.163278	0.128605	0.149697	0.151644	0.150396	0.155047	0.131581	0.140343	0.162789	0.144971	0.16902	0.139972	0.194291	0.173995	0.166316	0.162605	0.12326	0.164618	0.166691	0.153156	0.203537
630.4	0.208902	0.207976	0.207804	0.217351	0.216754	0.219816	0.208358	0.223141	0.22508	0.230517	0.225505	0.231927	0.241431	0.23852	0.26763	0.255212	0.230652	0.219623	0.247573	0.250052	0.280604	0.28526	0.285327	0.276386	0.272828			630.4	0.162153	0.127663	0.148734	0.150539	0.149252	0.153983	0.130571	0.139244	0.161651	0.143879	0.167784	0.138938	0.192989	0.172814	0.165166	0.161417	0.12231	0.163382	0.1655	0.152124	0.202068
630.6	0.20715	0.20621	0.206366	0.215682	0.215205	0.21786	0.206784	0.221266	0.223604	0.228674	0.223471	0.230054	0.239593	0.236546	0.265337	0.252868	0.228803	0.218029	0.24549	0.248117	0.278458	0.282877	0.282932	0.274176	0.270852			630.6	0.160739	0.126737	0.147471	0.14942	0.147969	0.152694	0.129395	0.138231	0.160333	0.142755	0.166327	0.137672	0.191546	0.171441	0.163785	0.160176	0.121289	0.161994	0.164018	0.150872	0.20027
630.8	0.205967	0.204891	0.204847	0.214202	0.213818	0.216237	0.205333	0.219654	0.222227	0.227274	0.221874	0.228553	0.237926	0.234931	0.263382	0.25118	0.227245	0.216642	0.243765	0.246495	0.276309	0.280876	0.280855	0.272579	0.268993			630.8	0.159641	0.125931	0.14645	0.148399	0.146967	0.151735	0.128531	0.137372	0.159146	0.141822	0.165254	0.136766	0.190143	0.170209	0.162673	0.159038	0.120251	0.16086	0.162916	0.14986	0.198889
631	0.204813	0.203767	0.203772	0.213174	0.212678	0.214967	0.204383	0.218454	0.221038	0.226227	0.220597	0.227343	0.236649	0.233826	0.262002	0.249776	0.226179	0.21554	0.242474	0.245236	0.274585	0.279374	0.279256	0.271121	0.267537			631	0.158727	0.125194	0.145585	0.147617	0.146088	0.15092	0.127748	0.136668	0.158168	0.141076	0.164518	0.136019	0.189035	0.169177	0.161799	0.158103	0.119454	0.159992	0.162088	0.148987	0.197749
631.2	0.203067	0.202201	0.202166	0.211583	0.211019	0.213308	0.202779	0.216914	0.219522	0.22429	0.218703	0.225295	0.234655	0.231953	0.259922	0.247682	0.224653	0.213957	0.240585	0.24342	0.272184	0.276884	0.276822	0.268951	0.265424			631.2	0.157413	0.124297	0.1443	0.146409	0.144948	0.149612	0.12646	0.13537	0.156842	0.139894	0.163178	0.134887	0.187344	0.167717	0.160425	0.156752	0.118439	0.158662	0.160718	0.14771	0.196119
631.4	0.202287	0.201207	0.201331	0.210761	0.210072	0.212404	0.202083	0.216053	0.218813	0.223649	0.217755	0.224566	0.233825	0.230865	0.258824	0.24653	0.22377	0.213189	0.239717	0.242531	0.271048	0.275826	0.27576	0.267908	0.264236			631.4	0.156774	0.123657	0.143849	0.145861	0.14428	0.148986	0.125876	0.134748	0.156173	0.139281	0.162516	0.134373	0.186348	0.166952	0.159818	0.156158	0.117897	0.157914	0.160064	0.147097	0.195262
631.6	0.200689	0.199751	0.199863	0.20923	0.208306	0.210967	0.200446	0.214313	0.216931	0.221911	0.216004	0.222983	0.231933	0.229158	0.256672	0.244318	0.221756	0.211695	0.237799	0.24068	0.268951	0.273379	0.273621	0.265796	0.262308			631.6	0.155517	0.122732	0.142832	0.144538	0.143075	0.147688	0.124644	0.133503	0.154927	0.138034	0.161232	0.133313	0.184574	0.165392	0.158455	0.15486	0.116833	0.156516	0.158708	0.145816	0.193489
631.8	0.199618	0.19865	0.198956	0.208108	0.207279	0.209845	0.199493	0.213117	0.215683	0.220688	0.214603	0.221697	0.230528	0.227859	0.255334	0.242939	0.22074	0.210617	0.236701	0.239527	0.267704	0.271805	0.272073	0.264406	0.261048			631.8	0.154639	0.122132	0.141982	0.143762	0.142305	0.146808	0.123885	0.132611	0.153944	0.137316	0.1603	0.132617	0.183497	0.164446	0.157566	0.153955	0.116193	0.155528	0.157832	0.14501	0.192393
632	0.19855	0.197367	0.197574	0.206728	0.205991	0.208509	0.198144	0.211583	0.214183	0.219181	0.212721	0.220256	0.228996	0.22637	0.253743	0.241217	0.219388	0.209208	0.235142	0.238032	0.265919	0.26979	0.270174	0.262567	0.259445			632	0.15361	0.121296	0.140906	0.142702	0.141404	0.145738	0.123024	0.131653	0.152828	0.136312	0.159197	0.131694	0.182158	0.163379	0.156459	0.152915	0.115438	0.154358	0.156697	0.143979	0.190896
632.2	0.196639	0.195644	0.196061	0.205068	0.204534	0.206748	0.196673	0.210203	0.212871	0.21751	0.210844	0.2183	0.227105	0.224519	0.251724	0.239056	0.217472	0.207356	0.233561	0.236073	0.263649	0.26751	0.267831	0.26058	0.25737			632.2	0.152424	0.12044	0.139745	0.141563	0.140318	0.144575	0.121876	0.13048	0.151638	0.135169	0.157895	0.130545	0.180471	0.162074	0.1551	0.151702	0.114254	0.153034	0.155465	0.14278	0.189088
632.4	0.195943	0.194781	0.195407	0.204129	0.203702	0.205926	0.19583	0.209422	0.212265	0.216603	0.210088	0.217466	0.226207	0.223528	0.250755	0.238323	0.216304	0.20643	0.23278	0.235178	0.262588	0.266289	0.266764	0.259583	0.256162			632.4	0.151787	0.120067	0.13916	0.140938	0.13971	0.14401	0.121365	0.129848	0.150946	0.134574	0.157306	0.129991	0.179595	0.161476	0.154478	0.151092	0.113726	0.152133	0.154871	0.142194	0.188218
632.6	0.194491	0.193091	0.193776	0.202763	0.202068	0.204144	0.194332	0.207666	0.210552	0.214754	0.208331	0.21615	0.224235	0.221631	0.248793	0.236646	0.214599	0.204835	0.23118	0.233213	0.260136	0.264456	0.264347	0.257628	0.253987			632.6	0.150455	0.119193	0.137999	0.139795	0.138564	0.142832	0.120185	0.128766	0.149632	0.133369	0.155888	0.128836	0.178145	0.159973	0.153151	0.14993	0.112692	0.150746	0.15359	0.141074	0.186596
632.8	0.193469	0.191969	0.192784	0.201621	0.201051	0.202997	0.193491	0.206718	0.20931	0.21377	0.207211	0.215093	0.223252	0.220523	0.247491	0.235356	0.21361	0.20361	0.230095	0.231922	0.25883	0.26301	0.262907	0.256347	0.252732			632.8	0.149664	0.118589	0.137335	0.139048	0.137817	0.141994	0.119505	0.128109	0.14882	0.132594	0.155063	0.128038	0.177241	0.158991	0.152217	0.149147	0.112128	0.14977	0.152854	0.1403	0.185521
633	0.192187	0.190744	0.191624	0.200273	0.199947	0.201762	0.192485	0.205487	0.207744	0.212421	0.205578	0.213747	0.22172	0.2191	0.245964	0.233617	0.212311	0.20201	0.228567	0.230448	0.257144	0.261059	0.261101	0.254742	0.251099			633	0.148603	0.117826	0.136408	0.138151	0.136851	0.140933	0.118612	0.127417	0.147864	0.131655	0.153985	0.127203	0.176246	0.157794	0.151098	0.148099	0.111331	0.148565	0.151983	0.139302	0.18411
633.2	0.190838	0.189314	0.190318	0.198587	0.198358	0.20015	0.19099	0.20386	0.205807	0.210938	0.204161	0.212278	0.219731	0.217214	0.244033	0.231701	0.210693	0.20043	0.226567	0.228674	0.254688	0.258383	0.259305	0.252659	0.248859			633.2	0.147399	0.11697	0.135124	0.13702	0.135701	0.139778	0.117548	0.126522	0.14661	0.130566	0.152631	0.125973	0.17498	0.156465	0.149823	0.146769	0.110499	0.147283	0.150829	0.138074	0.182592
633.4	0.18962	0.187871	0.188903	0.197187	0.197026	0.198862	0.189861	0.202702	0.204399	0.209505	0.202886	0.210591	0.218081	0.215653	0.24262	0.230156	0.209225	0.199227	0.225157	0.227079	0.253128	0.25665	0.257864	0.25101	0.24712			633.4	0.146444	0.116289	0.134167	0.136142	0.134707	0.138877	0.116605	0.125671	0.145538	0.129668	0.151567	0.124983	0.173667	0.155212	0.148765	0.145714	0.109737	0.146391	0.149818	0.137073	0.181322
633.6	0.188682	0.186844	0.187951	0.196147	0.195964	0.197923	0.189037	0.201659	0.203396	0.208442	0.201909	0.209347	0.216761	0.214564	0.241389	0.228818	0.208271	0.198051	0.224034	0.225905	0.251826	0.255127	0.256577	0.249618	0.245733			633.6	0.145656	0.115683	0.133368	0.135508	0.133954	0.138112	0.11593	0.124964	0.144735	0.128973	0.150706	0.124166	0.172622	0.154254	0.147888	0.144871	0.10914	0.14556	0.149092	0.136289	0.180325
633.8	0.187341	0.185462	0.186291	0.194773	0.194376	0.196264	0.187577	0.199898	0.201736	0.207169	0.200318	0.207904	0.21505	0.212963	0.239601	0.227132	0.206835	0.196708	0.222591	0.22422	0.249294	0.253229	0.254463	0.247781	0.243703			633.8	0.14456	0.114831	0.132246	0.134259	0.132909	0.137089	0.114921	0.123911	0.1435	0.12787	0.14949	0.123127	0.170792	0.152988	0.146675	0.143689	0.108316	0.144246	0.147886	0.135119	0.178753
634	0.1865	0.184777	0.185729	0.194143	0.193627	0.195402	0.186974	0.199115	0.200933	0.206321	0.199633	0.206935	0.214188	0.212342	0.238856	0.226217	0.206152	0.195954	0.221762	0.223363	0.248244	0.252265	0.253302	0.246575	0.242799			634	0.144024	0.114267	0.131734	0.133709	0.132295	0.136477	0.114256	0.123357	0.14296	0.127308	0.148857	0.122539	0.170118	0.152316	0.145984	0.143131	0.107858	0.143603	0.147314	0.134544	0.177947
634.2	0.185045	0.18334	0.184395	0.192601	0.192212	0.193869	0.185262	0.19784	0.199389	0.204506	0.198244	0.205367	0.212405	0.210646	0.236845	0.224184	0.204424	0.194271	0.220037	0.221464	0.246376	0.250266	0.251581	0.244747	0.240911			634.2	0.142912	0.113466	0.130486	0.13252	0.131172	0.135371	0.113058	0.122179	0.141857	0.126161	0.147556	0.121466	0.168681	0.151114	0.144772	0.141923	0.107094	0.142421	0.146121	0.133326	0.176496
634.4	0.184156	0.182434	0.183471	0.191639	0.191228	0.192985	0.184185	0.19676	0.198308	0.203598	0.197194	0.204248	0.211268	0.209574	0.235389	0.222924	0.203223	0.1932	0.218833	0.220206	0.245196	0.248939	0.250019	0.243335	0.239694			634.4	0.142205	0.112842	0.129825	0.131833	0.130426	0.134699	0.112431	0.121568	0.14107	0.125453	0.146751	0.120737	0.167894	0.150293	0.14393	0.141131	0.106494	0.141569	0.14534	0.132601	0.175478
634.6	0.182881	0.18143	0.182265	0.190505	0.190118	0.19176	0.18285	0.195719	0.196837	0.202285	0.195823	0.202605	0.209881	0.208217	0.233598	0.221492	0.201711	0.191826	0.217378	0.218723	0.243676	0.247027	0.248035	0.241661	0.238134			634.6	0.141312	0.112216	0.128813	0.130911	0.129546	0.13389	0.111483	0.120841	0.140028	0.124606	0.145733	0.119864	0.166867	0.14917	0.142863	0.140117	0.105725	0.140574	0.14426	0.131688	0.174214
634.8	0.181593	0.180231	0.180653	0.18922	0.188729	0.190061	0.181563	0.19399	0.195344	0.200749	0.19423	0.201086	0.208226	0.206386	0.231802	0.219628	0.200172	0.190007	0.215848	0.217083	0.241513	0.24513	0.246263	0.239812	0.236265			634.8	0.140104	0.111203	0.127474	0.129945	0.128497	0.132861	0.110702	0.120026	0.138793	0.123609	0.144529	0.118712	0.165514	0.147939	0.141794	0.138996	0.104902	0.139383	0.143138	0.130557	0.172768
635	0.180676	0.179567	0.179879	0.188553	0.188033	0.189221	0.180908	0.193402	0.194567	0.199967	0.193653	0.200275	0.207429	0.205587	0.230967	0.218662	0.199354	0.189081	0.214975	0.216299	0.240496	0.244178	0.245167	0.238965	0.235386			635	0.139557	0.110775	0.12687	0.129336	0.127962	0.132311	0.11028	0.119541	0.138213	0.123069	0.143943	0.118129	0.164852	0.14732	0.141251	0.138452	0.104559	0.138789	0.142584	0.130014	0.172019
635.2	0.179179	0.178182	0.17847	0.187091	0.186672	0.187814	0.179668	0.19216	0.193082	0.198474	0.192302	0.19842	0.205683	0.203973	0.229059	0.217166	0.197741	0.187404	0.213291	0.214686	0.238709	0.24205	0.243148	0.237159	0.233454			635.2	0.138451	0.109897	0.126043	0.128297	0.126911	0.131283	0.109325	0.118485	0.137048	0.122049	0.142723	0.116994	0.163439	0.146149	0.140048	0.137275	0.103608	0.137553	0.141475	0.128848	0.17055
635.4	0.178373	0.177517	0.177538	0.186163	0.185729	0.186685	0.17873	0.191157	0.191939	0.197505	0.191397	0.19738	0.204563	0.202862	0.227915	0.216103	0.196932	0.186581	0.212096	0.213589	0.237273	0.240686	0.241799	0.235903	0.232264			635.4	0.137649	0.109213	0.1253	0.127593	0.126201	0.130548	0.108679	0.117843	0.136253	0.121364	0.141935	0.116278	0.162508	0.14532	0.139236	0.136519	0.103024	0.136814	0.140675	0.128111	0.169574
635.6	0.177321	0.176587	0.176354	0.185104	0.184569	0.185161	0.177649	0.189757	0.19029	0.196322	0.190186	0.19605	0.203236	0.201573	0.226363	0.214347	0.195771	0.185428	0.210705	0.212171	0.235495	0.239258	0.239977	0.234397	0.230694			635.6	0.136733	0.108295	0.124464	0.126675	0.125362	0.12966	0.107793	0.117073	0.135385	0.120563	0.140898	0.11531	0.161379	0.144182	0.138246	0.135542	0.102365	0.136134	0.139598	0.127222	0.168382
635.8	0.175859	0.175287	0.175181	0.183692	0.183313	0.183788	0.176153	0.188563	0.188928	0.194919	0.188453	0.19424	0.201508	0.199966	0.224583	0.212373	0.194374	0.183875	0.209104	0.210649	0.233645	0.237053	0.238308	0.232281	0.229003			635.8	0.13561	0.107257	0.123526	0.125548	0.12433	0.128675	0.106871	0.116047	0.134317	0.119572	0.139728	0.114455	0.16009	0.143106	0.137071	0.134342	0.101565	0.135127	0.138377	0.126156	0.16695
636	0.174957	0.17435	0.174323	0.182908	0.182332	0.182688	0.175166	0.187598	0.188001	0.193822	0.187567	0.193063	0.200333	0.198867	0.223353	0.211196	0.193451	0.182883	0.207965	0.209578	0.232368	0.235643	0.236996	0.230975	0.227701			636	0.134862	0.106544	0.122758	0.124757	0.123636	0.127988	0.106132	0.115424	0.133572	0.11892	0.138945	0.113782	0.159158	0.142372	0.136326	0.133578	0.10095	0.134326	0.137583	0.125458	0.166013
636.2	0.173834	0.173012	0.173185	0.181856	0.180985	0.181269	0.173908	0.186419	0.186811	0.192537	0.186466	0.191676	0.199075	0.197482	0.221885	0.209919	0.192228	0.181715	0.2066	0.208241	0.230876	0.234005	0.235433	0.22936	0.2262			636.2	0.133976	0.105724	0.121819	0.123822	0.122819	0.127214	0.10541	0.114571	0.132685	0.118072	0.137999	0.112839	0.15795	0.141373	0.135406	0.132703	0.100301	0.133313	0.136542	0.124662	0.164887
636.4	0.172384	0.171645	0.171767	0.180448	0.179622	0.179914	0.172771	0.184836	0.1855	0.191002	0.184734	0.190044	0.19784	0.195858	0.220238	0.208432	0.190742	0.180292	0.205024	0.206638	0.229314	0.232447	0.233077	0.227465	0.224641			636.4	0.132873	0.104717	0.120806	0.122751	0.121851	0.126183	0.104585	0.113598	0.131431	0.117058	0.136932	0.112029	0.156533	0.140199	0.134229	0.131641	0.0994447	0.13211	0.135398	0.12362	0.163465
636.6	0.171718	0.170962	0.17118	0.179879	0.178908	0.179102	0.172185	0.184248	0.184763	0.190185	0.183937	0.189231	0.196966	0.195151	0.219251	0.207629	0.190247	0.179539	0.204244	0.205746	0.228414	0.231383	0.232205	0.226425	0.223807			636.6	0.132329	0.10422	0.120171	0.122291	0.121392	0.125666	0.104217	0.113084	0.130882	0.116561	0.136326	0.111549	0.155752	0.139654	0.133648	0.131138	0.0990107	0.131557	0.134922	0.123081	0.162758
636.8	0.170398	0.169718	0.169724	0.178562	0.177652	0.177477	0.170618	0.182602	0.183108	0.188592	0.182287	0.187908	0.195416	0.193619	0.217386	0.205859	0.188777	0.178185	0.202619	0.203918	0.226211	0.229222	0.23027	0.224661	0.221999			636.8	0.131166	0.103377	0.119252	0.121164	0.12042	0.12462	0.103225	0.112256	0.129783	0.115571	0.135187	0.110744	0.154408	0.138383	0.132469	0.130036	0.0982342	0.130472	0.133657	0.122043	0.161342
637	0.169445	0.168804	0.168966	0.177472	0.176737	0.176619	0.169693	0.181769	0.182142	0.187371	0.181317	0.186587	0.194315	0.192507	0.216204	0.204548	0.187855	0.177051	0.201434	0.202869	0.224985	0.228005	0.229034	0.223492	0.220713			637	0.13045	0.102727	0.118649	0.120417	0.119734	0.123914	0.102616	0.111585	0.129021	0.114928	0.134481	0.1101	0.153673	0.137657	0.1317	0.129296	0.0975634	0.129772	0.132956	0.121358	0.160494
637.2	0.168201	0.167578	0.167963	0.176124	0.175487	0.175808	0.168498	0.180821	0.180983	0.185961	0.180014	0.185175	0.19297	0.191049	0.214804	0.203007	0.186608	0.175607	0.200018	0.201498	0.223566	0.22641	0.227758	0.222077	0.219188			637.2	0.129553	0.101974	0.11784	0.11951	0.118973	0.123035	0.101963	0.110871	0.128113	0.1141	0.133557	0.109316	0.152594	0.136633	0.130807	0.128352	0.0968176	0.128889	0.132004	0.120491	0.159385
637.4	0.167025	0.166358	0.166556	0.174727	0.173979	0.174228	0.1671	0.17954	0.179549	0.184505	0.178372	0.183558	0.191193	0.189511	0.213181	0.20139	0.18536	0.173906	0.198458	0.200002	0.2216	0.224539	0.225642	0.22006	0.217334			637.4	0.128488	0.100932	0.117043	0.118516	0.118039	0.121963	0.101204	0.109863	0.126951	0.113219	0.1324	0.108332	0.151159	0.135465	0.12963	0.127315	0.0959176	0.127661	0.130822	0.119575	0.157896
637.6	0.166189	0.16552	0.165651	0.173932	0.173049	0.173027	0.166319	0.178467	0.178602	0.183493	0.177501	0.182515	0.190207	0.188407	0.212201	0.20044	0.184375	0.172897	0.197474	0.198871	0.220408	0.223342	0.22454	0.219016	0.216076			637.6	0.127686	0.100293	0.116407	0.117741	0.117405	0.121261	0.100603	0.109193	0.126277	0.11254	0.131695	0.107763	0.150276	0.134698	0.128848	0.126632	0.095293	0.126971	0.130065	0.118879	0.156983
637.8	0.165181	0.16439	0.164645	0.172775	0.171796	0.171891	0.165306	0.177048	0.177479	0.182251	0.176172	0.181538	0.188777	0.18704	0.211014	0.198959	0.183163	0.171652	0.196165	0.197421	0.218967	0.221802	0.223226	0.217462	0.214661			637.8	0.126746	0.099482	0.115615	0.11687	0.116628	0.120324	0.0999539	0.108495	0.125426	0.111683	0.130771	0.106965	0.149262	0.133776	0.127907	0.12578	0.0946169	0.126043	0.129224	0.118073	0.155823
638	0.163946	0.162809	0.163556	0.17127	0.170519	0.170624	0.164099	0.17578	0.175976	0.180723	0.174843	0.179902	0.187285	0.185635	0.209306	0.197515	0.181598	0.170509	0.194465	0.195868	0.217168	0.219635	0.220972	0.215483	0.21298			638	0.125659	0.0985612	0.114842	0.115927	0.115654	0.119304	0.0990619	0.107616	0.124208	0.11061	0.129605	0.106109	0.148084	0.132642	0.12672	0.124671	0.0937368	0.12491	0.128076	0.117163	0.154413
638.2	0.163529	0.162217	0.162881	0.170485	0.169862	0.169995	0.163323	0.175068	0.175281	0.180119	0.174008	0.179142	0.186445	0.184898	0.208248	0.196867	0.181042	0.16987	0.193758	0.19507	0.21635	0.218709	0.220285	0.2146	0.212069			638.2	0.125141	0.0980387	0.114387	0.115471	0.115178	0.118855	0.0986414	0.107182	0.123684	0.110135	0.129045	0.105743	0.147444	0.131967	0.126146	0.124109	0.0933222	0.124436	0.127389	0.116705	0.153748
638.4	0.162251	0.160647	0.16169	0.16907	0.168435	0.168645	0.161734	0.173273	0.173921	0.178645	0.172663	0.177832	0.185079	0.183333	0.206514	0.194951	0.179382	0.168495	0.192253	0.193396	0.214242	0.216942	0.218554	0.212852	0.210304			638.4	0.124177	0.0970115	0.113418	0.114474	0.114193	0.117835	0.0976481	0.106485	0.122639	0.10925	0.127964	0.10473	0.146065	0.130773	0.125091	0.123029	0.0924948	0.123335	0.12625	0.115717	0.15237
638.6	0.161434	0.159627	0.160866	0.16822	0.167487	0.167926	0.160725	0.172305	0.172971	0.177637	0.171673	0.176689	0.184113	0.18237	0.205447	0.193819	0.178443	0.167456	0.191263	0.192363	0.21323	0.215734	0.217298	0.211719	0.209183			638.6	0.123521	0.0964441	0.112919	0.113854	0.113516	0.117201	0.0970215	0.10599	0.121975	0.108635	0.127222	0.104123	0.1451	0.129999	0.124376	0.122259	0.0919746	0.122656	0.12558	0.115079	0.151501
638.8	0.160324	0.158508	0.159584	0.167036	0.166407	0.166979	0.159564	0.171344	0.17184	0.176409	0.170282	0.17548	0.18298	0.181077	0.204175	0.192554	0.177328	0.166267	0.189919	0.190976	0.211811	0.214179	0.215765	0.210301	0.207834			638.8	0.122696	0.0958208	0.112185	0.113091	0.112735	0.116346	0.0963132	0.10531	0.121129	0.1078	0.126319	0.103437	0.143978	0.129164	0.123489	0.121384	0.0912507	0.121766	0.124798	0.11428	0.150404
639	0.159153	0.157329	0.158303	0.165723	0.164978	0.16579	0.158571	0.169939	0.170358	0.17495	0.169048	0.173933	0.181848	0.179674	0.202347	0.191073	0.175989	0.164991	0.188368	0.189475	0.210071	0.212428	0.213826	0.208714	0.205964			639	0.121698	0.0949716	0.111165	0.112202	0.11178	0.115387	0.0953949	0.104561	0.120139	0.106869	0.125327	0.102418	0.142506	0.128065	0.122361	0.120334	0.0904685	0.120617	0.123864	0.113231	0.14909
639.2	0.158248	0.156382	0.15754	0.164881	0.164084	0.164919	0.157684	0.168996	0.169397	0.174046	0.167989	0.173044	0.180772	0.17859	0.201277	0.190012	0.174997	0.164031	0.187375	0.188531	0.208735	0.211269	0.212758	0.207632	0.204898			639.2	0.121057	0.0944848	0.11062	0.111641	0.111137	0.114741	0.094901	0.103947	0.11946	0.10627	0.124532	0.101823	0.141645	0.127216	0.121698	0.119601	0.0899571	0.119947	0.123199	0.112545	0.148257
639.4	0.15726	0.155246	0.156506	0.163827	0.163015	0.163713	0.156598	0.167999	0.168257	0.172924	0.166703	0.171788	0.179385	0.177291	0.199768	0.188746	0.173652	0.162824	0.186071	0.187259	0.20719	0.209836	0.211204	0.206185	0.203437			639.4	0.120194	0.0937709	0.109956	0.110822	0.110348	0.11396	0.0942702	0.103202	0.118555	0.105541	0.123635	0.101049	0.140563	0.126268	0.120793	0.118646	0.0892151	0.119112	0.122408	0.111721	0.147213
639.6	0.156087	0.154091	0.155043	0.162595	0.16165	0.162247	0.155018	0.166613	0.166944	0.171291	0.165274	0.170421	0.177611	0.175973	0.198166	0.186924	0.172035	0.161327	0.184655	0.18584	0.205307	0.207961	0.209608	0.204534	0.201868			639.6	0.119144	0.0929719	0.109091	0.109936	0.10935	0.112987	0.0933236	0.102275	0.11765	0.104561	0.122524	0.10005	0.13926	0.125153	0.119887	0.117644	0.0884319	0.118015	0.121275	0.110791	0.145867
639.8	0.155518	0.153596	0.154388	0.161937	0.160989	0.161484	0.154403	0.165789	0.166399	0.170679	0.164452	0.169912	0.17701	0.175268	0.197407	0.186099	0.171309	0.16074	0.183947	0.185162	0.204422	0.207023	0.208417	0.203624	0.201069			639.8	0.118605	0.0925477	0.108697	0.109443	0.108907	0.112515	0.0929414	0.102015	0.117189	0.104133	0.121966	0.0997274	0.138653	0.124717	0.119347	0.117088	0.088039	0.117412	0.120655	0.110382	0.145244
640	0.154203	0.152446	0.153136	0.160564	0.159696	0.160243	0.153358	0.164455	0.165144	0.169283	0.163272	0.168513	0.175749	0.173771	0.195844	0.184641	0.169925	0.159399	0.182485	0.183742	0.202772	0.205366	0.206698	0.201965	0.199559			640	0.117645	0.0917145	0.107773	0.108577	0.10794	0.111552	0.0921351	0.101126	0.116144	0.103245	0.120945	0.0986306	0.137376	0.123743	0.118271	0.116078	0.0871889	0.116253	0.119592	0.10941	0.143867
640.2	0.153437	0.151628	0.15229	0.159781	0.15882	0.159414	0.152548	0.16351	0.16424	0.168374	0.162345	0.167724	0.174621	0.172842	0.19478	0.183842	0.168901	0.1586	0.181457	0.182609	0.201719	0.204152	0.205472	0.20082	0.198655			640.2	0.117009	0.0911799	0.107159	0.10803	0.107322	0.110974	0.0916223	0.100752	0.115478	0.102621	0.12017	0.0979567	0.136545	0.123036	0.11758	0.115356	0.0867479	0.115503	0.118856	0.108831	0.143019
640.4	0.152611	0.150723	0.151221	0.158822	0.157868	0.158264	0.151522	0.162331	0.163006	0.167288	0.161223	0.166543	0.173416	0.171668	0.193463	0.182755	0.167864	0.157617	0.180171	0.181205	0.200326	0.202849	0.203798	0.199382	0.197486			640.4	0.116208	0.0904561	0.106361	0.10736	0.106534	0.110246	0.0909397	0.100042	0.114591	0.10188	0.119271	0.0971521	0.135624	0.122194	0.116739	0.114465	0.086219	0.114551	0.118043	0.108057	0.141902
640.6	0.151171	0.149491	0.150052	0.157549	0.156674	0.157086	0.150442	0.161016	0.161498	0.166019	0.159889	0.165235	0.172195	0.170183	0.191811	0.181118	0.166254	0.156624	0.178768	0.179734	0.198758	0.201169	0.201962	0.197904	0.19599			640.6	0.115199	0.0896376	0.105217	0.106413	0.105585	0.10933	0.0901581	0.0992416	0.113736	0.101037	0.118212	0.0962201	0.134259	0.12118	0.115773	0.113475	0.0855105	0.113591	0.116951	0.107115	0.140723
640.8	0.150294	0.148691	0.149286	0.156614	0.155922	0.156358	0.149587	0.160384	0.160511	0.16514	0.158873	0.164399	0.17123	0.169346	0.190784	0.180107	0.165305	0.155635	0.177778	0.178852	0.197662	0.199866	0.200662	0.196812	0.194873			640.8	0.114606	0.0891237	0.104566	0.105876	0.104988	0.10867	0.0895523	0.0986921	0.113079	0.100442	0.117434	0.0956016	0.133419	0.120454	0.115148	0.112812	0.08507	0.112907	0.116321	0.106563	0.139881
641	0.149361	0.147725	0.148279	0.15557	0.155054	0.155262	0.148422	0.159501	0.159472	0.163996	0.157961	0.163206	0.170038	0.16816	0.189439	0.178931	0.16425	0.154429	0.176521	0.177771	0.196193	0.198476	0.199097	0.195542	0.193409			641	0.113824	0.0885086	0.103757	0.105224	0.104182	0.107954	0.0887793	0.0979087	0.112277	0.0997119	0.116475	0.0948906	0.132357	0.119557	0.114358	0.111947	0.0844502	0.112027	0.1155	0.10581	0.138863
641.2	0.148026	0.146574	0.14695	0.154355	0.153736	0.154042	0.146946	0.158209	0.158221	0.162649	0.156497	0.161774	0.168662	0.166777	0.18788	0.177308	0.163044	0.152845	0.175117	0.176375	0.194425	0.196931	0.197525	0.193911	0.191819			641.2	0.112904	0.0877549	0.102648	0.104352	0.103227	0.107002	0.087899	0.0970603	0.111472	0.0989678	0.115514	0.0939957	0.131125	0.118544	0.11335	0.110996	0.0836633	0.111047	0.114543	0.104832	0.137636
641.4	0.147518	0.145871	0.146324	0.15383	0.15318	0.153311	0.146534	0.157586	0.157594	0.16189	0.155807	0.161	0.168145	0.166037	0.187234	0.176534	0.162417	0.152071	0.174411	0.175584	0.19347	0.196115	0.196574	0.193024	0.191013			641.4	0.112399	0.0873949	0.102238	0.103891	0.102754	0.106601	0.0874184	0.0966689	0.110948	0.0985044	0.115	0.0934126	0.130613	0.118084	0.112876	0.110504	0.0831948	0.110603	0.114202	0.104342	0.136996
641.6	0.14626	0.14492	0.145044	0.152558	0.151859	0.151851	0.145527	0.156575	0.156176	0.160625	0.154454	0.159306	0.166855	0.164649	0.185782	0.174891	0.16125	0.150921	0.17287	0.174131	0.191903	0.194517	0.194982	0.191283	0.189368			641.6	0.111433	0.0867442	0.101287	0.102938	0.101913	0.105752	0.0867763	0.0957444	0.110005	0.097603	0.114018	0.0925945	0.129364	0.116989	0.111825	0.109529	0.0824147	0.109594	0.113252	0.103507	0.135862
641.8	0.145331	0.14426	0.144266	0.151682	0.151059	0.150983	0.144806	0.155834	0.155201	0.159794	0.15362	0.158544	0.165878	0.163762	0.184606	0.173912	0.160252	0.149924	0.172046	0.173175	0.190777	0.193252	0.193985	0.190188	0.188227			641.8	0.110806	0.0862422	0.100666	0.102398	0.101364	0.105131	0.0862583	0.0951269	0.109297	0.0970004	0.113365	0.0920209	0.128655	0.116338	0.111207	0.108914	0.0820329	0.10879	0.11256	0.102913	0.135051
642	0.144267	0.143325	0.143454	0.150676	0.150054	0.149996	0.143972	0.154658	0.15412	0.158614	0.152764	0.157324	0.164599	0.162686	0.183241	0.172599	0.159124	0.148806	0.171055	0.17211	0.189398	0.19181	0.192807	0.188815	0.186984			642	0.110027	0.0856447	0.0998604	0.101673	0.100601	0.104394	0.0856428	0.0944158	0.108464	0.0962453	0.112592	0.0912075	0.127754	0.11555	0.110365	0.108063	0.0814819	0.107872	0.111661	0.102144	0.134038
642.2	0.143018	0.142171	0.142331	0.149433	0.148874	0.148681	0.142671	0.153529	0.15288	0.157225	0.151496	0.156296	0.163198	0.161241	0.181842	0.171111	0.15763	0.147387	0.169743	0.170736	0.187759	0.190151	0.191271	0.187333	0.185679			642.2	0.109129	0.084935	0.0989515	0.100822	0.0997357	0.10351	0.0847857	0.0936183	0.107493	0.095372	0.111544	0.0902791	0.126635	0.114427	0.109388	0.107135	0.0805998	0.10693	0.110579	0.101327	0.132745
642.4	0.14217	0.141479	0.141439	0.148572	0.148091	0.14791	0.141795	0.152762	0.152165	0.156368	0.150769	0.155329	0.162324	0.160495	0.1808	0.169992	0.156688	0.146498	0.168865	0.169807	0.186622	0.189085	0.190193	0.186313	0.184673			642.4	0.108483	0.0843823	0.0983357	0.100273	0.0991752	0.102907	0.084267	0.0930506	0.106882	0.0948541	0.110915	0.0897127	0.125978	0.113895	0.108742	0.10651	0.080132	0.106219	0.109966	0.100765	0.131919
642.6	0.141043	0.140688	0.140508	0.147497	0.147125	0.147145	0.140758	0.151615	0.151235	0.155262	0.149946	0.154367	0.161291	0.159495	0.17957	0.168769	0.155721	0.145391	0.167855	0.168563	0.185341	0.187632	0.189148	0.185139	0.183346			642.6	0.107697	0.0837511	0.0976058	0.0996094	0.09842	0.102111	0.0835583	0.0923426	0.106197	0.0941274	0.11007	0.0890367	0.125146	0.113081	0.107946	0.10574	0.0796213	0.105328	0.109182	0.10002	0.130918
642.8	0.139893	0.139512	0.139546	0.146316	0.146013	0.145732	0.140021	0.150606	0.150097	0.154245	0.148843	0.15287	0.159968	0.158206	0.178033	0.167311	0.154584	0.144324	0.166555	0.166972	0.183742	0.18603	0.187532	0.183754	0.181666			642.8	0.106829	0.0829191	0.0967084	0.0987328	0.0976262	0.101223	0.0828124	0.0915718	0.105334	0.0933127	0.109118	0.088191	0.123926	0.112208	0.106874	0.104813	0.0788876	0.104406	0.108292	0.0991929	0.129734
643	0.139288	0.139003	0.138972	0.145775	0.145507	0.145263	0.139415	0.150019	0.149376	0.153465	0.148202	0.152054	0.159264	0.157591	0.177197	0.166535	0.153894	0.143763	0.165924	0.166269	0.182871	0.185277	0.186882	0.182995	0.18088			643	0.106369	0.0825715	0.0962618	0.0983215	0.0971999	0.100739	0.0824068	0.0910927	0.104826	0.0928842	0.108704	0.0876631	0.123385	0.111633	0.106451	0.104374	0.0785348	0.103941	0.10793	0.0987449	0.129084
643.2	0.138147	0.137839	0.137975	0.144603	0.14421	0.144107	0.138149	0.148728	0.148182	0.152224	0.146868	0.150507	0.157764	0.156174	0.175699	0.165218	0.152322	0.14258	0.164571	0.164882	0.18129	0.183715	0.185048	0.181401	0.17938			643.2	0.105544	0.0817847	0.0954964	0.0974379	0.0963589	0.0998332	0.0815595	0.0903969	0.103957	0.0921023	0.107741	0.0870236	0.122354	0.110647	0.105552	0.103498	0.077858	0.103002	0.107096	0.0979346	0.128039
643.4	0.137349	0.137144	0.137187	0.143729	0.143426	0.143332	0.137456	0.147923	0.14738	0.151471	0.146096	0.149531	0.156853	0.155418	0.174721	0.164094	0.151571	0.141645	0.163773	0.163989	0.180062	0.182645	0.1841	0.180349	0.178309			643.4	0.104904	0.0812681	0.0949473	0.0969027	0.0958483	0.0992085	0.0811195	0.0897839	0.103419	0.0915349	0.107144	0.0865688	0.121645	0.109906	0.104968	0.102903	0.0774172	0.102493	0.106523	0.0973846	0.12723
643.6	0.136314	0.136186	0.136117	0.142736	0.142394	0.14224	0.136547	0.146952	0.146452	0.150513	0.14494	0.148537	0.15573	0.154425	0.173442	0.162866	0.150447	0.140735	0.162759	0.162884	0.178449	0.181214	0.182866	0.179146	0.176868			643.6	0.104126	0.0807063	0.0942843	0.0961691	0.0951558	0.0984545	0.0804687	0.0891761	0.102709	0.0908216	0.106345	0.0858808	0.120704	0.108991	0.104197	0.10219	0.0767361	0.101797	0.105768	0.0967156	0.126292
643.8	0.135288	0.135144	0.135082	0.141636	0.141256	0.141175	0.135341	0.14566	0.145328	0.149265	0.14363	0.147256	0.154571	0.153147	0.172032	0.161733	0.149344	0.139738	0.161537	0.161508	0.176734	0.17965	0.181357	0.177752	0.175325			643.8	0.10327	0.0799743	0.0936381	0.0954373	0.0943481	0.0975773	0.0795951	0.088575	0.101671	0.0899372	0.105466	0.0850559	0.119615	0.107977	0.103208	0.101258	0.0759578	0.100745	0.105008	0.0958522	0.125102
644	0.134565	0.134378	0.134443	0.14094	0.140392	0.140391	0.134698	0.144863	0.144519	0.148367	0.142884	0.146289	0.153656	0.152292	0.171004	0.160643	0.148656	0.138967	0.160674	0.160587	0.175653	0.178687	0.18064	0.17681	0.174374			644	0.102653	0.0794696	0.0929786	0.094884	0.0937693	0.0970158	0.0791551	0.0880697	0.101064	0.0894565	0.104843	0.0845417	0.1188	0.107317	0.102622	0.100645	0.0754415	0.100195	0.104366	0.0952335	0.124307
644.2	0.133587	0.133408	0.133493	0.14001	0.139347	0.13938	0.13373	0.143904	0.143413	0.147259	0.141759	0.14527	0.152794	0.151226	0.16973	0.159371	0.147828	0.138076	0.159565	0.159515	0.174363	0.177485	0.179564	0.175615	0.17328			644.2	0.101925	0.0787644	0.092259	0.0941509	0.0931313	0.0962434	0.0785308	0.0875375	0.100246	0.0888364	0.104106	0.083967	0.11788	0.10657	0.101832	0.0998604	0.0748685	0.0994583	0.103604	0.0944718	0.123323
644.4	0.13257	0.132361	0.132416	0.138962	0.138268	0.138175	0.132737	0.142826	0.142163	0.146034	0.1407	0.144064	0.151377	0.149954	0.168223	0.157973	0.146728	0.137001	0.158187	0.158228	0.172813	0.175975	0.177834	0.17421	0.171754			644.4	0.101076	0.0781248	0.0915735	0.0933024	0.0924416	0.0954082	0.0777228	0.0868123	0.0993296	0.0880567	0.103171	0.0830962	0.116829	0.105672	0.100961	0.0988974	0.0741642	0.0986075	0.102712	0.0935938	0.122202
644.6	0.131886	0.131804	0.132009	0.138394	0.137627	0.137526	0.132206	0.142094	0.141441	0.145449	0.140105	0.14351	0.15068	0.149298	0.167469	0.157237	0.146133	0.136583	0.15746	0.157518	0.172178	0.175299	0.177042	0.173493	0.171148			644.6	0.10066	0.0777868	0.0910616	0.0928746	0.092039	0.0949148	0.0773709	0.0864552	0.0989103	0.0877317	0.102763	0.082804	0.116182	0.105211	0.100528	0.0985088	0.0738664	0.098208	0.10223	0.0931794	0.121626
644.8	0.130844	0.130584	0.130837	0.137385	0.136574	0.136555	0.131139	0.14087	0.140445	0.144121	0.138776	0.142567	0.149146	0.148139	0.166092	0.15596	0.144963	0.135362	0.156267	0.156277	0.17061	0.173655	0.175416	0.172165	0.169697			644.8	0.0997691	0.0770292	0.0903003	0.0921306	0.0911657	0.0940395	0.0763499	0.085727	0.0980328	0.0869784	0.101852	0.0820256	0.1152	0.104336	0.0997027	0.0976719	0.073281	0.0972711	0.101312	0.0923667	0.120498
645	0.130258	0.129794	0.130068	0.136666	0.135809	0.135802	0.130347	0.140216	0.139912	0.143258	0.13781	0.141705	0.148447	0.147258	0.165207	0.155063	0.144291	0.134692	0.155321	0.155518	0.169499	0.17267	0.174303	0.171131	0.168824			645	0.0992194	0.0765696	0.0896376	0.0915514	0.0906355	0.0934893	0.0759433	0.0852153	0.0975986	0.0865399	0.101272	0.081516	0.114455	0.103683	0.09911	0.097098	0.0726909	0.096692	0.100732	0.0918171	0.119799
645.2	0.129514	0.128843	0.129106	0.13576	0.134888	0.134842	0.129422	0.139388	0.138944	0.142367	0.136751	0.140788	0.147368	0.146261	0.164029	0.154118	0.143387	0.134015	0.154153	0.15451	0.168096	0.171337	0.172923	0.169817	0.167664			645.2	0.0985613	0.0759259	0.0889845	0.0908531	0.0900066	0.0927923	0.0754563	0.0845606	0.0969233	0.0859871	0.10049	0.0809385	0.113467	0.102886	0.098407	0.0964259	0.0720923	0.0959951	0.100036	0.091159	0.118927
645.4	0.128271	0.127637	0.128071	0.134586	0.133869	0.133561	0.128191	0.138198	0.137799	0.141339	0.135459	0.139432	0.145926	0.145151	0.162639	0.152887	0.142168	0.132977	0.152637	0.153168	0.166657	0.170171	0.171379	0.168241	0.166128			645.4	0.0977546	0.07518	0.0882742	0.0900129	0.0891942	0.0919808	0.0748028	0.0838292	0.096073	0.0852492	0.0996424	0.080252	0.112401	0.102085	0.0976357	0.0955084	0.0714835	0.0949612	0.0990525	0.0903249	0.117861
645.6	0.127659	0.126962	0.127378	0.133852	0.133241	0.132733	0.127496	0.137363	0.136916	0.140647	0.134519	0.138599	0.145135	0.144262	0.161672	0.152137	0.141399	0.132247	0.151759	0.152268	0.165774	0.169197	0.170307	0.167286	0.165108			645.6	0.0971646	0.0747422	0.0877268	0.0894658	0.0886388	0.0914481	0.0743458	0.0834079	0.0954258	0.0847365	0.0990924	0.0798087	0.111662	0.101467	0.0970007	0.0949677	0.070961	0.0943734	0.0985343	0.0898122	0.117076
645.8	0.12684	0.126007	0.126438	0.13289	0.132373	0.131526	0.126763	0.136321	0.135893	0.139712	0.133431	0.137515	0.14414	0.143172	0.160593	0.15105	0.14051	0.131388	0.15068	0.151344	0.1646	0.168217	0.168765	0.166017	0.164057			645.8	0.0964653	0.0741216	0.0870207	0.0887462	0.0880341	0.0907848	0.0737516	0.0829186	0.0945647	0.0841542	0.0983848	0.07929	0.110754	0.100793	0.0962718	0.0942873	0.0703517	0.0936789	0.0978048	0.0891929	0.116135
646	0.125715	0.124944	0.125409	0.131938	0.131291	0.130754	0.125493	0.134945	0.134616	0.138377	0.132217	0.136211	0.142833	0.141828	0.15914	0.149885	0.139333	0.130083	0.149366	0.1502	0.162983	0.166885	0.167289	0.164506	0.162815			646	0.0956362	0.073422	0.0863093	0.0879318	0.087272	0.0899284	0.0729399	0.0822422	0.0937721	0.0835017	0.0975437	0.0785328	0.109934	0.0999384	0.0954709	0.093345	0.069732	0.0926997	0.0969485	0.0884226	0.11514
646.2	0.125251	0.124339	0.124877	0.131388	0.130686	0.130328	0.124825	0.134337	0.134136	0.137949	0.13169	0.135768	0.142412	0.141136	0.158642	0.149197	0.138847	0.129471	0.148634	0.149595	0.162307	0.166058	0.166411	0.163872	0.162102			646.2	0.0952579	0.0730756	0.0859009	0.0874866	0.0868801	0.0895932	0.0725322	0.0818557	0.0933631	0.0831386	0.0971092	0.0782162	0.109417	0.0995354	0.0950251	0.0928879	0.0693959	0.0923025	0.0964708	0.0880813	0.114667
646.4	0.12438	0.123123	0.123849	0.130261	0.129661	0.129074	0.123853	0.133272	0.13296	0.136895	0.130425	0.134686	0.14117	0.140031	0.157315	0.147688	0.138	0.128528	0.147376	0.148308	0.160991	0.164864	0.165392	0.162437	0.160569			646.4	0.0943942	0.0723714	0.085058	0.0867337	0.0861704	0.0887938	0.0719218	0.0811374	0.0925662	0.0823847	0.0962847	0.0774217	0.108397	0.0986736	0.0942461	0.0920148	0.0687155	0.0915302	0.0955584	0.0873107	0.113634
646.6	0.123729	0.122412	0.123168	0.129669	0.128996	0.128226	0.123058	0.13265	0.132186	0.136058	0.129521	0.133957	0.140517	0.139109	0.156421	0.146969	0.137328	0.127847	0.146516	0.147535	0.160073	0.164012	0.164465	0.161552	0.159613			646.6	0.0938475	0.0719282	0.0845216	0.0862287	0.085625	0.0883334	0.0714605	0.0806912	0.0920077	0.0819093	0.0957172	0.0769691	0.107655	0.0981839	0.0936708	0.0914778	0.0681765	0.0909287	0.0950294	0.086768	0.112931
646.8	0.122947	0.121513	0.12244	0.128863	0.128159	0.127433	0.122132	0.131768	0.131188	0.135051	0.128494	0.133085	0.139662	0.137984	0.155302	0.145819	0.13655	0.126714	0.145327	0.146545	0.159006	0.162897	0.163248	0.160502	0.158492			646.8	0.0931466	0.0713599	0.0838403	0.0856398	0.0849843	0.0877508	0.070898	0.080049	0.0914048	0.0813546	0.095005	0.0764686	0.106789	0.0976119	0.0930139	0.0908201	0.0676582	0.0901228	0.0943479	0.0861434	0.112069
647	0.121908	0.12035	0.121369	0.127798	0.127116	0.126436	0.121386	0.130551	0.130197	0.134056	0.127648	0.132103	0.138119	0.136746	0.153992	0.144573	0.135415	0.125324	0.144029	0.145277	0.157799	0.161454	0.162123	0.159111	0.157236			647	0.0923859	0.0706921	0.0830479	0.0848681	0.0842298	0.0870383	0.0703078	0.0792561	0.0906472	0.0806329	0.0941322	0.0758741	0.105976	0.0968197	0.092266	0.0900112	0.0670684	0.0893277	0.0935606	0.0854035	0.111086
647.2	0.121257	0.119722	0.120642	0.127032	0.126496	0.125788	0.120568	0.129704	0.129574	0.133279	0.126815	0.131519	0.137411	0.135889	0.153214	0.143926	0.134762	0.124819	0.143234	0.144438	0.156871	0.160576	0.160914	0.158174	0.156379			647.2	0.0918623	0.0702664	0.0827151	0.0843651	0.0837208	0.0865787	0.0699019	0.0788364	0.0901263	0.0801513	0.0935886	0.0754306	0.105434	0.0963111	0.0916713	0.0894506	0.0667122	0.0886437	0.0931324	0.084883	0.110498
647.4	0.120451	0.118956	0.119898	0.126111	0.125669	0.125073	0.119945	0.128573	0.128818	0.132377	0.125807	0.13066	0.136413	0.135012	0.152248	0.143057	0.133766	0.124023	0.142301	0.143315	0.155841	0.159438	0.159659	0.157033	0.155256			647.4	0.0912123	0.0697361	0.0822523	0.0838077	0.083082	0.0860016	0.069514	0.0782127	0.0895387	0.0795885	0.0929717	0.0748077	0.104692	0.0956358	0.090994	0.0887602	0.0661545	0.0879004	0.0924266	0.0842739	0.109701
647.6	0.119482	0.117911	0.118883	0.125109	0.124605	0.124167	0.119029	0.127429	0.127789	0.13127	0.124647	0.129534	0.135247	0.133866	0.15112	0.141991	0.132479	0.122998	0.141252	0.142115	0.154471	0.157841	0.158389	0.155881	0.153954			647.6	0.0905093	0.0690545	0.0814899	0.0830958	0.0823432	0.0852369	0.0689862	0.0774958	0.0887041	0.0788849	0.09215	0.0741768	0.103632	0.0947783	0.0901914	0.0880124	0.0655367	0.0870128	0.0916085	0.0835926	0.108761
647.8	0.11886	0.117316	0.118138	0.124448	0.123915	0.123342	0.118236	0.126859	0.127113	0.130575	0.123929	0.128731	0.134683	0.133117	0.150295	0.141173	0.131742	0.122343	0.140532	0.141306	0.153567	0.156935	0.157574	0.155053	0.153142			647.8	0.0899782	0.0685691	0.0810025	0.0826389	0.0818694	0.0847745	0.0686032	0.0770313	0.0881864	0.0784105	0.0915604	0.0737735	0.103095	0.0942323	0.0896653	0.0875174	0.0650814	0.0864578	0.091097	0.0831469	0.108141
648	0.117988	0.116597	0.117364	0.1236	0.123095	0.122356	0.117277	0.126138	0.12621	0.12977	0.123153	0.12779	0.133775	0.132165	0.14925	0.140186	0.130809	0.121393	0.139443	0.140317	0.152453	0.155861	0.156403	0.153906	0.152126			648	0.0893162	0.0680108	0.080385	0.0820618	0.0812601	0.0842521	0.0682103	0.0764689	0.0875439	0.0778579	0.0908509	0.0732753	0.102439	0.0935079	0.0890045	0.0868816	0.0644809	0.0858387	0.0904183	0.0825268	0.107335
648.2	0.117045	0.115625	0.116455	0.122613	0.122166	0.121298	0.116427	0.125002	0.124953	0.128784	0.122025	0.126725	0.132682	0.131125	0.148128	0.138921	0.129554	0.120369	0.138366	0.138996	0.151412	0.154671	0.15501	0.152786	0.15085			648.2	0.0885045	0.067378	0.0797797	0.0813868	0.0805538	0.0835654	0.0676048	0.0756429	0.0865964	0.0771017	0.0900969	0.0725966	0.101586	0.0927351	0.0882205	0.0861118	0.0639457	0.0850903	0.0897614	0.0818745	0.106388
648.4	0.116537	0.115202	0.11608	0.122051	0.1217	0.120765	0.115947	0.124456	0.124544	0.128249	0.121464	0.126206	0.132196	0.130573	0.147589	0.13821	0.129006	0.119674	0.137708	0.138394	0.150711	0.154086	0.154146	0.152271	0.150202			648.4	0.0881114	0.0670589	0.0793684	0.0810088	0.0802271	0.0832113	0.0672019	0.0752905	0.0862182	0.0767671	0.0897144	0.0722201	0.101172	0.0923733	0.0878547	0.0857299	0.0636446	0.0845314	0.0893398	0.0815186	0.105939
648.6	0.115621	0.114231	0.115002	0.121088	0.120682	0.120108	0.115124	0.123232	0.123483	0.127201	0.120357	0.125226	0.131234	0.129333	0.146477	0.136851	0.128313	0.118655	0.136483	0.137356	0.149424	0.152528	0.15282	0.151146	0.149026			648.6	0.0872883	0.0664434	0.0786231	0.0803771	0.0795761	0.0824619	0.0666019	0.0745698	0.0854574	0.0761386	0.0889205	0.0715733	0.10025	0.0915787	0.086994	0.0850163	0.0630801	0.083925	0.0886975	0.0808097	0.105068
648.8	0.115006	0.113562	0.114296	0.120449	0.120021	0.119634	0.114566	0.122534	0.122973	0.126507	0.119672	0.124655	0.130543	0.128588	0.145763	0.13604	0.127673	0.118059	0.135692	0.136603	0.148456	0.151651	0.151931	0.150346	0.148261			648.8	0.0868357	0.0660463	0.0781158	0.0799508	0.0791271	0.0820078	0.0661911	0.0740699	0.0850119	0.0756921	0.0884004	0.0711291	0.0996931	0.0909816	0.0865064	0.0845087	0.0626693	0.083396	0.0880868	0.0803256	0.104476
649	0.114163	0.112674	0.113571	0.119713	0.119275	0.119017	0.113635	0.121962	0.122257	0.125649	0.118918	0.123675	0.129534	0.127696	0.144729	0.135148	0.126872	0.117269	0.13466	0.135636	0.147225	0.150456	0.150933	0.149355	0.147223			649	0.0862353	0.0655791	0.0775366	0.0794463	0.0785324	0.0814519	0.0656784	0.0735079	0.0845009	0.0751095	0.0877734	0.070604	0.0989282	0.0903024	0.0858942	0.0839307	0.0621025	0.0828551	0.0874217	0.0797198	0.10371
649.2	0.113383	0.111835	0.11258	0.118635	0.118359	0.118078	0.112641	0.120885	0.121142	0.124717	0.118056	0.122796	0.128541	0.126626	0.143636	0.133948	0.126018	0.116357	0.133447	0.134655	0.146199	0.149095	0.149459	0.147998	0.146			649.2	0.085552	0.0650091	0.0768233	0.0787398	0.0778679	0.0809409	0.0651365	0.072843	0.0836337	0.0744378	0.0870282	0.070041	0.0980999	0.0893804	0.0850857	0.0832775	0.0614049	0.0820858	0.0866995	0.0790441	0.102728
649.4	0.112685	0.111177	0.111998	0.118038	0.117813	0.117488	0.111968	0.120311	0.120561	0.12402	0.117307	0.121976	0.127952	0.125915	0.14279	0.133372	0.125382	0.115588	0.132716	0.133922	0.14541	0.148224	0.148699	0.147242	0.14529			649.4	0.0850541	0.0646135	0.0763592	0.0783379	0.0774228	0.0805153	0.0647153	0.0724399	0.0831351	0.0739989	0.0864894	0.0696135	0.0975112	0.0888995	0.0845618	0.0828202	0.0610494	0.0816481	0.0863512	0.0785618	0.102081
649.6	0.111891	0.110561	0.111132	0.117336	0.117003	0.116711	0.111237	0.119636	0.119826	0.123158	0.116499	0.12102	0.127003	0.125126	0.141805	0.132571	0.124486	0.114748	0.131784	0.133058	0.144415	0.147082	0.147647	0.146234	0.144374			649.6	0.0844471	0.0642104	0.0757198	0.077766	0.0768981	0.0800402	0.0641863	0.0719765	0.0825175	0.0734422	0.0858221	0.0691543	0.0967963	0.0883527	0.0839373	0.082242	0.0607078	0.0810422	0.085778	0.0779215	0.101306
649.8	0.111023	0.109634	0.110217	0.116408	0.116062	0.115844	0.110367	0.118556	0.118831	0.122173	0.115691	0.120048	0.125665	0.124262	0.140664	0.131432	0.123448	0.113798	0.130706	0.131977	0.143346	0.145726	0.146546	0.145042	0.143347			649.8	0.0838005	0.0636244	0.0751023	0.0771569	0.0763067	0.0793899	0.0635672	0.0711764	0.0817306	0.0729054	0.0851353	0.0685466	0.0959721	0.0875226	0.0832111	0.0815285	0.0602727	0.0803064	0.0850536	0.0773136	0.100467
650	0.110433	0.109079	0.10961	0.115818	0.115415	0.115178	0.109665	0.117961	0.118146	0.121434	0.115056	0.119325	0.124951	0.123631	0.139979	0.13081	0.122835	0.11328	0.130101	0.131327	0.142554	0.145009	0.145742	0.144132	0.142601			650	0.0833462	0.0633049	0.0747286	0.0766838	0.0759193	0.0789568	0.0631738	0.0706934	0.0812483	0.0725	0.0846716	0.0680489	0.095391	0.0869653	0.0827152	0.0810346	0.0598425	0.0798913	0.0845617	0.0768662	0.0998387
[truncated: 181 more columns]
