# Supplementary material for: Autophagosome membrane expansion is mediated by the N-terminus and cis-membrane association of human ATG8s
Source: eLife journal article supplement (doi:10.7554/elife.89185), 2023-06-08
Supplement: fig3-figsupp2-data1 [file Source data for Fig.3-S2.xlsx]

## Sheet: Figure 3-figure supplement 2
Figure 3-figure supplement 2A															Figure 3-figure supplement 2B																			Figure 3-figure supplement 2C													Figure 3-figure supplement 2D
	LC3B K42CNBD-his (n=3)															LC3B R69CNBD-his (n=4)																			LC3B R70CNBD-his (n=2)													GABARAP A39CNBD-his (n=3)
Wavelength (nm)	+blank liposomes			+blank liposomes+100mM imidazole			+Rh liposomes			+Rh liposomes+100mM imidazole					Wavelength (nm)	+blank liposomes				+blank liposomes+100mM imidazole				+Rh liposomes				+Rh liposomes+100mM imidazole						Wavelength (nm)	+blank liposomes		+blank liposomes+100mM imidazole		+Rh liposomes		+Rh liposomes+100mM imidazole						Wavelength (nm)	+blank liposomes
	R1	R2	R3	R1	R2	R3	R1	R2	R3	R1	R2	R3				R1	R2	R3	R4	R1	R2	R3	R4	R1	R2	R3	R4	R1	R2	R3	R4				R1	R2	R1	R2	R1	R2	R1	R2						R1	R2
500	0.118329	0.130556	0.149481	0.0455249	0.0586204	0.0781939	0.119922	0.118035	0.124237	0.0453867	0.0403676	0.04674			500	0.0169912	0.0622863	0.0722924	0.0653635	0.0182757	0.0230861	0.0324247	0.050584	0.0272509	0.0615121	0.0770984	0.0442856	0.00780094	0.0319499	0.0470014	0.0251793			500	0.297832	0.338794	0.21073	0.233527	0.313354	0.277752	0.273799	0.234985					500	0.525402	0.599587
500.2	0.118566	0.1316	0.148756	0.0474069	0.0598373	0.0790689	0.119323	0.11742	0.123469	0.0478326	0.0429678	0.0479065			500.2	0.0188595	0.0617253	0.0718007	0.0653779	0.0200476	0.0243822	0.0338523	0.0507471	0.0284511	0.0608554	0.0758573	0.0452786	0.0101021	0.0336505	0.0476557	0.0266375			500.2	0.301866	0.34057	0.214486	0.236128	0.316935	0.281233	0.277772	0.236785					500.2	0.498091	0.569007
500.4	0.119956	0.132564	0.147729	0.0521352	0.0626809	0.0796834	0.119006	0.116855	0.123127	0.052222	0.0471954	0.0508513			500.4	0.0226123	0.0611446	0.0712872	0.0644026	0.0243229	0.0282613	0.03731	0.049876	0.0306166	0.0602326	0.0738976	0.0477442	0.0144414	0.0364136	0.0489377	0.028825			500.4	0.309763	0.344327	0.222236	0.240777	0.324341	0.288378	0.285896	0.240225					500.4	0.44886	0.512156
500.6	0.120769	0.133018	0.146943	0.0544678	0.0640579	0.0793719	0.118713	0.116064	0.123582	0.0548488	0.0494863	0.0533672			500.6	0.0244933	0.0610789	0.0710647	0.0638822	0.0265055	0.030242	0.0389961	0.0493425	0.0312815	0.059825	0.0730228	0.0489866	0.0166885	0.0376997	0.0493461	0.0306752			500.6	0.313648	0.34634	0.226093	0.243092	0.328057	0.291965	0.290118	0.242303					500.6	0.426023	0.485926
500.8	0.122777	0.133679	0.145519	0.0582142	0.0666722	0.0788633	0.118388	0.115681	0.125519	0.0587306	0.0532291	0.0577019			500.8	0.0282091	0.0606184	0.0707737	0.0632389	0.0293376	0.0334709	0.0423282	0.0491555	0.0326928	0.06029	0.0726136	0.0513098	0.0207863	0.0398709	0.0501903	0.0336569			500.8	0.321764	0.350479	0.233455	0.247924	0.335685	0.298818	0.298426	0.24653					500.8	0.384797	0.437684
501	0.124905	0.135112	0.144466	0.0606055	0.0687472	0.0789792	0.118881	0.115926	0.126944	0.0616477	0.0560843	0.0607413			501	0.0313978	0.060624	0.070945	0.0632888	0.0312644	0.0354737	0.0447586	0.0495738	0.0344179	0.0606318	0.0721045	0.0527474	0.0232882	0.0419416	0.0510556	0.0359029			501	0.328509	0.354466	0.239182	0.251981	0.342028	0.305154	0.305224	0.250184					501	0.357489	0.403805
501.2	0.126493	0.136511	0.144059	0.0625057	0.0705744	0.0796038	0.119244	0.116089	0.128464	0.0641528	0.0586166	0.062632			501.2	0.0334922	0.0607149	0.0711833	0.0633914	0.0329354	0.0370934	0.0466239	0.0500985	0.0358424	0.060811	0.0716584	0.0537927	0.0255094	0.0436378	0.0518835	0.0372835			501.2	0.334015	0.357845	0.243775	0.255355	0.347163	0.310246	0.31074	0.25298					501.2	0.337711	0.37863
501.4	0.129084	0.137859	0.144774	0.06531	0.0722985	0.0809197	0.120539	0.116912	0.130182	0.0675348	0.0615467	0.0646308			501.4	0.0367195	0.0609828	0.0718332	0.0637953	0.0358446	0.0390641	0.0486474	0.0507639	0.0378332	0.0610041	0.0714922	0.055795	0.0285189	0.0455446	0.0525909	0.0391317			501.4	0.34082	0.36259	0.249443	0.259716	0.353597	0.316337	0.317579	0.256765					501.4	0.317406	0.352203
501.6	0.131287	0.139033	0.145815	0.0676675	0.0737223	0.0819874	0.121666	0.118061	0.13168	0.0699327	0.0640566	0.0666423			501.6	0.0392969	0.0613403	0.0723662	0.0644707	0.0379148	0.0406907	0.050383	0.0512666	0.0392241	0.0614678	0.0715854	0.0578433	0.0308234	0.0470329	0.0533693	0.0406984			501.6	0.346334	0.366584	0.253992	0.263256	0.358807	0.321379	0.323114	0.259875					501.6	0.302457	0.333296
501.8	0.133979	0.141053	0.147229	0.071028	0.0757403	0.0834719	0.122715	0.119307	0.133552	0.0729271	0.0671608	0.0693417			501.8	0.042011	0.0621819	0.0733131	0.0655812	0.0406128	0.0426823	0.0526548	0.0518533	0.0406448	0.0621463	0.0720771	0.0593816	0.0333434	0.0489457	0.0545137	0.0424177			501.8	0.353448	0.371749	0.259614	0.267972	0.365674	0.327489	0.329915	0.263824					501.8	0.287186	0.313718
502	0.136173	0.142974	0.148374	0.0735176	0.0775426	0.0844186	0.123673	0.120484	0.135243	0.0754345	0.0696695	0.071056			502	0.0440998	0.0629809	0.0741534	0.0666423	0.0426207	0.0439879	0.0543361	0.0525589	0.0416322	0.0628635	0.0726283	0.0605934	0.0355817	0.0506685	0.0554186	0.0437464			502	0.359125	0.376097	0.264211	0.271724	0.371022	0.332486	0.335378	0.267008					502	0.276073	0.299175
502.2	0.139285	0.145656	0.150259	0.0764109	0.0800403	0.0863783	0.126193	0.122586	0.137403	0.0782189	0.0726341	0.0736871			502.2	0.0464622	0.0641195	0.0752431	0.0677183	0.0445321	0.0459016	0.0563917	0.0533845	0.0433732	0.0640795	0.0734602	0.0624258	0.0375625	0.0526204	0.0565623	0.0455956			502.2	0.36626	0.381907	0.269835	0.276597	0.377883	0.338938	0.342313	0.271385					502.2	0.265145	0.284657
502.4	0.141834	0.147728	0.151663	0.0786772	0.0820558	0.0880178	0.128089	0.124383	0.139317	0.0804614	0.0749923	0.0759498			502.4	0.048346	0.0649603	0.0760901	0.0684494	0.0461987	0.0475757	0.0579711	0.0541726	0.0447002	0.0652125	0.074193	0.0639416	0.0390764	0.0543354	0.057786	0.0472516			502.4	0.37202	0.386551	0.274245	0.280472	0.383463	0.344108	0.347931	0.275015					502.4	0.258221	0.274373
502.6	0.145205	0.150527	0.153881	0.081471	0.084339	0.089826	0.130141	0.126695	0.14162	0.0831711	0.0780005	0.078359			502.6	0.0506681	0.0661628	0.0771769	0.0695992	0.048389	0.0494568	0.0598805	0.0551718	0.04631	0.0664829	0.0751086	0.0659626	0.0410489	0.056303	0.0592278	0.0491061			502.6	0.379114	0.392594	0.279698	0.285278	0.390304	0.350414	0.35475	0.279471					502.6	0.251995	0.26477
502.8	0.147853	0.152856	0.156117	0.0837654	0.0862783	0.0913062	0.131861	0.128528	0.143495	0.085282	0.0802824	0.0803506			502.8	0.0525921	0.0671284	0.078244	0.0706867	0.0502105	0.051086	0.0616034	0.0559912	0.0475797	0.0676203	0.076006	0.0675365	0.0425606	0.0578731	0.0603218	0.0505576			502.8	0.384735	0.397536	0.284081	0.289325	0.395949	0.355549	0.360166	0.283053					502.8	0.247919	0.258008
503	0.151388	0.156123	0.159049	0.086824	0.0889912	0.093083	0.134552	0.131084	0.146082	0.0880935	0.0826809	0.0828374			503	0.054783	0.0684697	0.0797219	0.0725061	0.0523562	0.053021	0.0636868	0.0570964	0.0490169	0.0690691	0.0772071	0.0693238	0.0442459	0.0596798	0.0616843	0.0523829			503	0.391875	0.403861	0.289508	0.294216	0.403109	0.361965	0.366928	0.287745					503	0.24484	0.252331
503.2	0.154137	0.158814	0.161356	0.0891605	0.091252	0.0946002	0.136859	0.133359	0.148396	0.0904963	0.0845228	0.0848596			503.2	0.0564319	0.0695188	0.0808941	0.0739457	0.0540161	0.054692	0.0653122	0.0580236	0.0500876	0.0702529	0.0782472	0.070914	0.0455652	0.0610729	0.0627228	0.0536574			503.2	0.397546	0.409118	0.293969	0.298152	0.408799	0.367067	0.372345	0.29155					503.2	0.242872	0.248416
503.4	0.157806	0.162038	0.164748	0.0920886	0.0936518	0.0967121	0.139816	0.136134	0.151389	0.0932746	0.0872966	0.0872411			503.4	0.0585666	0.0712433	0.0825246	0.0757825	0.0559231	0.056463	0.0670435	0.0592262	0.0515209	0.0720079	0.0798373	0.0728074	0.0473073	0.0630531	0.0642891	0.0551133			503.4	0.404671	0.415754	0.299406	0.303272	0.416083	0.373472	0.379244	0.296335					503.4	0.24205	0.244762
503.6	0.160872	0.164646	0.167442	0.0944893	0.0955546	0.0985259	0.142183	0.138355	0.153614	0.0956271	0.0894998	0.0891182			503.6	0.0601736	0.0724428	0.08392	0.0772144	0.0574254	0.05776	0.0683489	0.0603597	0.0526726	0.0734031	0.0810733	0.0742992	0.0487721	0.064611	0.065518	0.0564013			503.6	0.410361	0.421232	0.303703	0.307298	0.421894	0.378646	0.384783	0.300277					503.6	0.242137	0.242237
503.8	0.164805	0.168384	0.170867	0.0972322	0.0984014	0.100904	0.145291	0.141429	0.156566	0.0983562	0.0923875	0.0919798			503.8	0.062391	0.0742504	0.0857318	0.0791178	0.0591168	0.0596819	0.0702701	0.0620051	0.0541655	0.0753238	0.0830988	0.0762742	0.0503682	0.0666552	0.0671763	0.0582424			503.8	0.417586	0.428359	0.309294	0.312541	0.429223	0.385168	0.391561	0.305305					503.8	0.242891	0.241534
504	0.168005	0.171274	0.173815	0.0996155	0.100731	0.103043	0.148087	0.144022	0.159207	0.100685	0.0945901	0.094177			504	0.0640201	0.0756591	0.0871764	0.0807142	0.0606542	0.0611864	0.0717976	0.063379	0.055487	0.0769335	0.0846754	0.0779502	0.0517253	0.068217	0.0685035	0.0596848			504	0.423392	0.434138	0.313655	0.316733	0.435067	0.390353	0.397024	0.309382					504	0.243981	0.241285
504.2	0.171983	0.175223	0.177746	0.102792	0.103548	0.105783	0.15151	0.147177	0.16265	0.103805	0.0973248	0.0970265			504.2	0.0660662	0.0775319	0.0891234	0.08281	0.0628666	0.0629455	0.0736805	0.0651788	0.0569684	0.0788793	0.0864682	0.0801468	0.0534558	0.0701446	0.0702059	0.0615384			504.2	0.430633	0.441274	0.319024	0.322097	0.442421	0.397179	0.403893	0.3146					504.2	0.246257	0.242448
504.4	0.175316	0.178408	0.180905	0.105179	0.105906	0.107977	0.154367	0.149872	0.165384	0.106308	0.0995393	0.0993805			504.4	0.0676228	0.0789914	0.0907958	0.0844039	0.0645039	0.0644252	0.0751764	0.0666222	0.0582649	0.080506	0.0879964	0.0819418	0.0548501	0.0717847	0.0717574	0.063134			504.4	0.436348	0.446946	0.323364	0.326367	0.44838	0.40251	0.409384	0.31866					504.4	0.248172	0.243759
504.6	0.179427	0.18258	0.185107	0.108323	0.108786	0.11085	0.158047	0.153124	0.168933	0.109451	0.102525	0.102121			504.6	0.0697459	0.0810643	0.0929372	0.0865905	0.0665631	0.0663513	0.0772468	0.0684257	0.0598437	0.0825539	0.0901042	0.0842683	0.0567418	0.0740557	0.0736876	0.0648993			504.6	0.443733	0.454246	0.328809	0.331795	0.455981	0.409146	0.416265	0.32387					504.6	0.251378	0.246014
504.8	0.182792	0.186034	0.188549	0.110928	0.111066	0.113143	0.161055	0.155663	0.171811	0.111959	0.10488	0.104531			504.8	0.0713288	0.0827184	0.0947007	0.0883586	0.0681579	0.0678287	0.0788206	0.069978	0.0611387	0.0842787	0.0918711	0.0861948	0.0582905	0.0757901	0.0751467	0.0664238			504.8	0.449712	0.460213	0.333114	0.336203	0.462046	0.414499	0.42188	0.328168					504.8	0.254209	0.248075
505	0.187276	0.190625	0.192955	0.114231	0.113908	0.11627	0.164904	0.159191	0.175742	0.11514	0.107922	0.107559			505	0.0733528	0.0848564	0.0970079	0.0906393	0.0701835	0.0696506	0.0808798	0.0718536	0.0627064	0.0865685	0.0940321	0.0884582	0.0600623	0.0780455	0.0771051	0.0684153			505	0.457132	0.467614	0.338698	0.341724	0.469732	0.421358	0.428815	0.333561					505	0.258188	0.251393
505.2	0.190923	0.194257	0.196573	0.11682	0.116381	0.118691	0.168083	0.162124	0.178917	0.117649	0.110419	0.109936			505.2	0.0751417	0.0866352	0.0988843	0.0924603	0.0718978	0.0712409	0.0826256	0.0733752	0.0640421	0.0884494	0.0959314	0.0903015	0.0615537	0.0797715	0.0786574	0.0700498			505.2	0.463126	0.473614	0.343253	0.346179	0.47582	0.426803	0.434395	0.337785					505.2	0.261456	0.254097
505.4	0.195412	0.198744	0.201118	0.119948	0.119513	0.121675	0.172105	0.165839	0.183018	0.120786	0.11346	0.112983			505.4	0.077273	0.0887905	0.101228	0.0948586	0.0739698	0.0733253	0.0847258	0.0753541	0.0658774	0.0908986	0.0983064	0.0927123	0.0632972	0.0820187	0.0805412	0.0719857			505.4	0.470521	0.481017	0.348828	0.351721	0.483672	0.433568	0.44138	0.343081					505.4	0.265966	0.257604
505.6	0.19908	0.20241	0.204786	0.122462	0.122035	0.124164	0.17538	0.168877	0.186486	0.123318	0.116019	0.115569			505.6	0.0790145	0.0906254	0.103061	0.0969237	0.0757091	0.0750311	0.0863901	0.0769424	0.0673754	0.0928075	0.100193	0.0947005	0.064789	0.0837943	0.0820947	0.0735753			505.6	0.476402	0.486993	0.353344	0.356089	0.490011	0.43891	0.446923	0.347278					505.6	0.269897	0.260584
505.8	0.203784	0.207148	0.209745	0.125897	0.125529	0.127426	0.179598	0.172842	0.190978	0.126623	0.119333	0.118776			505.8	0.0812445	0.0929718	0.105646	0.0995745	0.0778624	0.0772623	0.0886678	0.0789163	0.069096	0.0953724	0.102544	0.0972639	0.0666975	0.0861223	0.0841152	0.0755159			505.8	0.483996	0.494753	0.358947	0.361723	0.497703	0.445633	0.453832	0.352686					505.8	0.274787	0.265146
506	0.207549	0.211046	0.213887	0.128714	0.128262	0.130103	0.183012	0.176018	0.194439	0.129307	0.121959	0.121487			506	0.0830618	0.094923	0.107849	0.101794	0.0796109	0.0790601	0.0904977	0.0805699	0.0703606	0.0974141	0.104533	0.0993115	0.0682306	0.0879637	0.0857893	0.0771367			506	0.490139	0.500946	0.363551	0.366274	0.50387	0.451143	0.459472	0.357058					506	0.278852	0.26898
506.2	0.212395	0.216118	0.218922	0.132225	0.131547	0.133586	0.187407	0.180126	0.198881	0.132792	0.125411	0.12502			506.2	0.0852185	0.097443	0.110474	0.104644	0.081861	0.0811257	0.0927509	0.0828184	0.0721896	0.0999206	0.107122	0.102059	0.0701588	0.0903982	0.0879938	0.0792068			506.2	0.497826	0.508813	0.369147	0.371925	0.511569	0.457997	0.466476	0.362695					506.2	0.284132	0.274214
506.4	0.216336	0.220306	0.222791	0.1351	0.134135	0.136226	0.190965	0.183373	0.202665	0.135637	0.128168	0.127839			506.4	0.087042	0.0994917	0.112557	0.106836	0.0836461	0.0828632	0.0945693	0.0846404	0.0737084	0.102013	0.10926	0.104463	0.0717321	0.0924207	0.0897355	0.0809181			506.4	0.503984	0.515068	0.373713	0.376371	0.517774	0.463606	0.472067	0.367124					506.4	0.288599	0.278407
506.6	0.22162	0.225321	0.228014	0.138663	0.137655	0.13982	0.195391	0.187348	0.207363	0.139066	0.131641	0.131331			506.6	0.0894419	0.10216	0.115376	0.10971	0.0860143	0.0851345	0.0968983	0.0870034	0.075779	0.104727	0.111956	0.107247	0.0736229	0.0949086	0.0920803	0.0831333			506.6	0.51146	0.522822	0.379234	0.382116	0.525665	0.470551	0.478968	0.372668					506.6	0.294712	0.283605
506.8	0.225813	0.229492	0.232221	0.141501	0.14057	0.14283	0.198966	0.190757	0.21114	0.141992	0.134364	0.134144			506.8	0.091359	0.104359	0.117596	0.111904	0.0879077	0.0869628	0.0989019	0.0889268	0.0773995	0.10697	0.114164	0.109488	0.0752071	0.0969382	0.0939553	0.0849414			506.8	0.517501	0.529079	0.383825	0.386754	0.531843	0.476123	0.48453	0.377089					506.8	0.299422	0.28802
507	0.231037	0.234917	0.237448	0.145205	0.144264	0.146599	0.203617	0.195024	0.216179	0.14563	0.137863	0.137583			507	0.0937561	0.107088	0.120389	0.114851	0.0903064	0.0893384	0.101397	0.0913369	0.0795138	0.109792	0.116894	0.112376	0.0772118	0.0995578	0.0962191	0.0871215			507	0.525359	0.536868	0.389483	0.392567	0.539696	0.483139	0.491771	0.382637					507	0.305457	0.294065
507.2	0.235253	0.239185	0.241774	0.148103	0.14722	0.149598	0.207301	0.198636	0.220457	0.148755	0.140656	0.140435			507.2	0.0957611	0.109329	0.122732	0.117361	0.0923735	0.0911757	0.10342	0.093296	0.0811496	0.112148	0.119244	0.114711	0.0789016	0.101659	0.0980367	0.0889832			507.2	0.531512	0.543224	0.394083	0.397204	0.54603	0.488822	0.497616	0.387046					507.2	0.310345	0.298881
507.4	0.240584	0.244719	0.247404	0.151856	0.15087	0.153535	0.21215	0.203216	0.225566	0.15273	0.144429	0.144037			507.4	0.0982938	0.112181	0.125856	0.120524	0.0947037	0.0936371	0.105995	0.0958207	0.0832658	0.115171	0.122075	0.117679	0.0809092	0.104418	0.100464	0.0914312			507.4	0.539246	0.551097	0.399666	0.403043	0.55396	0.495983	0.504839	0.392559					507.4	0.316892	0.304992
507.6	0.244771	0.249185	0.25181	0.15491	0.153885	0.156827	0.215974	0.206927	0.229634	0.155809	0.147434	0.146917			507.6	0.100347	0.114493	0.128367	0.123084	0.0965766	0.0956514	0.108092	0.0978106	0.0851463	0.117664	0.124446	0.120037	0.082587	0.106583	0.10243	0.0934596			507.6	0.545615	0.557436	0.404202	0.407651	0.560259	0.501651	0.51074	0.396981					507.6	0.322131	0.31002
507.8	0.249068	0.253581	0.256204	0.158112	0.157026	0.160075	0.220029	0.210594	0.233934	0.158888	0.15034	0.149853			507.8	0.10245	0.116891	0.130788	0.125695	0.0986394	0.0976771	0.110298	0.099918	0.0869001	0.120112	0.126901	0.122456	0.0842367	0.108829	0.104326	0.0954026			507.8	0.551844	0.5638	0.408825	0.412245	0.566642	0.507324	0.516604	0.401523					507.8	0.327633	0.315076
508	0.254597	0.259068	0.26171	0.162088	0.16114	0.164187	0.225018	0.215419	0.239114	0.162647	0.154077	0.153652			508	0.105137	0.119956	0.133826	0.128904	0.101261	0.100127	0.112995	0.10262	0.0891737	0.12322	0.129987	0.125577	0.0863499	0.111551	0.106688	0.097946			508	0.559464	0.57168	0.414559	0.418049	0.574381	0.514337	0.523998	0.407183					508	0.334556	0.321325
508.2	0.259267	0.263702	0.266319	0.165301	0.164349	0.167384	0.229023	0.219161	0.243421	0.165841	0.157151	0.156642			508.2	0.107358	0.12239	0.13637	0.131558	0.10335	0.102183	0.115187	0.104664	0.0908982	0.125775	0.132409	0.128135	0.0881365	0.113894	0.108783	0.0998991			508.2	0.565706	0.578101	0.41911	0.422451	0.580588	0.519954	0.529725	0.411643					508.2	0.339967	0.326526
508.4	0.265051	0.269542	0.272113	0.169272	0.168457	0.171362	0.23396	0.224006	0.248805	0.169989	0.16104	0.160324			508.4	0.110191	0.125494	0.139555	0.134911	0.106058	0.104891	0.117939	0.107346	0.0931543	0.12892	0.135485	0.131482	0.0904138	0.11681	0.111349	0.102419			508.4	0.573492	0.586095	0.424792	0.428114	0.588558	0.526911	0.536837	0.417124					508.4	0.34688	0.33275
508.6	0.272033	0.27658	0.279081	0.174293	0.173629	0.176553	0.239998	0.229757	0.255272	0.175084	0.165941	0.164825			508.6	0.113518	0.129304	0.14342	0.139119	0.109127	0.10816	0.121336	0.110618	0.0959465	0.132849	0.139366	0.135799	0.0932079	0.120511	0.11464	0.105446			508.6	0.582624	0.59549	0.431507	0.435027	0.598048	0.535219	0.545304	0.423955					508.6	0.355402	0.340894
508.8	0.275641	0.280195	0.28284	0.176983	0.176152	0.179156	0.243197	0.232544	0.258575	0.17773	0.168343	0.167361			508.8	0.115257	0.131231	0.145514	0.141108	0.110806	0.109789	0.123112	0.112257	0.0972783	0.134852	0.141353	0.137853	0.0946575	0.122227	0.11623	0.107083			508.8	0.587282	0.600289	0.434903	0.438577	0.602772	0.539327	0.549604	0.427427					508.8	0.359901	0.344832
509	0.282767	0.287362	0.290121	0.182411	0.181238	0.18435	0.249593	0.23838	0.265169	0.182789	0.173176	0.172212			509	0.118699	0.135064	0.149785	0.145118	0.114213	0.113141	0.12669	0.115673	0.100134	0.138779	0.145248	0.142054	0.0975054	0.125976	0.119486	0.110324			509	0.596606	0.609883	0.441653	0.445574	0.611773	0.547838	0.558071	0.434325					509	0.368381	0.353053
509.2	0.286447	0.291048	0.293863	0.18495	0.183809	0.186766	0.252732	0.241326	0.268337	0.185398	0.175681	0.174368			509.2	0.12042	0.137136	0.151969	0.147245	0.1159	0.114902	0.128389	0.117398	0.101526	0.140857	0.147286	0.144138	0.0990234	0.127865	0.121185	0.112033			509.2	0.601216	0.614665	0.445104	0.449116	0.616465	0.55204	0.56252	0.437673					509.2	0.372885	0.357336
509.4	0.293775	0.298474	0.301036	0.190484	0.188883	0.192135	0.259108	0.247362	0.275192	0.190814	0.180692	0.179142			509.4	0.123993	0.141041	0.156116	0.151419	0.119442	0.118425	0.132076	0.120852	0.104547	0.145005	0.151419	0.148392	0.101743	0.131815	0.124564	0.115156			509.4	0.610011	0.624026	0.451591	0.455988	0.625704	0.56022	0.571058	0.444192					509.4	0.381226	0.365554
509.6	0.297638	0.302423	0.304655	0.193192	0.191552	0.194678	0.262296	0.250253	0.278832	0.193497	0.183145	0.181299			509.6	0.125806	0.14327	0.158208	0.153699	0.121113	0.120331	0.133916	0.122553	0.106045	0.147205	0.153524	0.150594	0.103279	0.133806	0.126293	0.116874			509.6	0.614524	0.62862	0.455106	0.459333	0.630248	0.564396	0.57521	0.447517					509.6	0.385707	0.36967
509.8	0.305167	0.309842	0.312099	0.198563	0.197169	0.200343	0.268969	0.256536	0.285515	0.199214	0.188342	0.186049			509.8	0.129405	0.147346	0.162568	0.158079	0.124715	0.123826	0.137781	0.126148	0.109133	0.15162	0.157622	0.15495	0.10625	0.137818	0.129648	0.120239			509.8	0.623613	0.637907	0.461736	0.46612	0.639444	0.572624	0.583645	0.454217					509.8	0.394667	0.378121
510	0.30889	0.313565	0.315938	0.201382	0.20013	0.203272	0.272362	0.259785	0.288905	0.202041	0.190828	0.188428			510	0.131319	0.149426	0.164719	0.160267	0.126507	0.125687	0.139629	0.127841	0.110741	0.153792	0.159821	0.157218	0.107748	0.139779	0.1313	0.12205			510	0.628175	0.642589	0.465081	0.469526	0.644047	0.576783	0.587932	0.457537					510	0.399027	0.382383
510.2	0.316373	0.321254	0.323554	0.207142	0.205931	0.20869	0.279128	0.265997	0.296056	0.207496	0.196033	0.193442			510.2	0.135116	0.153536	0.169213	0.164865	0.130214	0.129356	0.143311	0.131471	0.114014	0.158138	0.164163	0.16173	0.110928	0.143675	0.134824	0.125499			510.2	0.637163	0.651921	0.471676	0.476255	0.653318	0.584964	0.596391	0.464218					510.2	0.408142	0.391104
510.4	0.320301	0.325019	0.327479	0.209838	0.208633	0.211366	0.282492	0.269273	0.299532	0.210448	0.198642	0.196066			510.4	0.137186	0.155618	0.171376	0.167223	0.132218	0.131303	0.145251	0.133298	0.115601	0.160437	0.16644	0.163989	0.112466	0.14564	0.136599	0.1273			510.4	0.641715	0.65662	0.475036	0.479553	0.657863	0.58906	0.600537	0.467438					510.4	0.41318	0.395158
510.6	0.328248	0.332826	0.335294	0.215755	0.214528	0.216852	0.289724	0.275126	0.306782	0.216127	0.204067	0.201211			510.6	0.141093	0.15991	0.175878	0.171646	0.135818	0.135165	0.149216	0.136956	0.118951	0.164751	0.170805	0.168604	0.115589	0.149739	0.14013	0.130772			510.6	0.650538	0.66569	0.481576	0.48613	0.666778	0.596971	0.608796	0.47414					510.6	0.422506	0.403663
510.8	0.33195	0.336886	0.339092	0.218774	0.217445	0.219717	0.293119	0.278306	0.310373	0.218912	0.206586	0.203815			510.8	0.142944	0.162187	0.178036	0.173974	0.13784	0.136962	0.151161	0.138882	0.120577	0.167057	0.173158	0.170939	0.117142	0.1518	0.141967	0.132622			510.8	0.655006	0.670118	0.484916	0.489428	0.671122	0.600926	0.612864	0.477383					510.8	0.426926	0.40802
511	0.339797	0.344653	0.346738	0.224786	0.223364	0.225302	0.300292	0.284789	0.317927	0.224774	0.21181	0.209078			511	0.146753	0.166859	0.182591	0.178574	0.141783	0.140774	0.155084	0.142742	0.123697	0.171525	0.177609	0.175631	0.120356	0.156043	0.145703	0.136198			511	0.663403	0.679157	0.491761	0.496161	0.680127	0.608636	0.620692	0.483934					511	0.436379	0.416884
511.2	0.343786	0.348624	0.350743	0.227711	0.226226	0.228075	0.303662	0.288097	0.321524	0.22792	0.214551	0.211667			511.2	0.148828	0.16912	0.185002	0.180965	0.143772	0.142728	0.157013	0.144512	0.125364	0.173842	0.179723	0.178094	0.122187	0.158142	0.147546	0.138071			511.2	0.667923	0.683608	0.49496	0.499339	0.68455	0.612502	0.624599	0.487217					511.2	0.441105	0.421299
511.4	0.351756	0.356862	0.358781	0.23366	0.232012	0.233905	0.31069	0.294543	0.328849	0.233733	0.219999	0.217121			511.4	0.152911	0.1737	0.189684	0.185754	0.147619	0.146801	0.161054	0.148257	0.12874	0.178763	0.184305	0.182892	0.12559	0.16256	0.151363	0.141833			511.4	0.67655	0.692747	0.501436	0.50587	0.693285	0.620552	0.63255	0.493647					511.4	0.45056	0.429948
511.6	0.355751	0.360845	0.362808	0.236695	0.235137	0.236857	0.314073	0.297739	0.33258	0.236798	0.222977	0.219697			511.6	0.154961	0.176036	0.192054	0.188064	0.149675	0.148821	0.163001	0.150156	0.130487	0.181216	0.186587	0.185366	0.127244	0.164717	0.153261	0.143802			511.6	0.680933	0.696978	0.504634	0.509291	0.697743	0.624503	0.636393	0.496947					511.6	0.455414	0.434511
511.8	0.363569	0.368693	0.371015	0.242694	0.240857	0.242882	0.321157	0.304186	0.339918	0.242901	0.228483	0.225276			511.8	0.158973	0.180658	0.196768	0.193043	0.153594	0.152854	0.167005	0.154398	0.133951	0.186097	0.191397	0.190377	0.130613	0.169221	0.15723	0.147691			511.8	0.689378	0.705567	0.510752	0.516011	0.706101	0.632139	0.644533	0.50336					511.8	0.464769	0.44351
512	0.367525	0.372643	0.375079	0.245905	0.243749	0.245889	0.324848	0.30758	0.343742	0.245942	0.231351	0.227925			512	0.160966	0.182889	0.199171	0.195575	0.155708	0.15483	0.169051	0.156264	0.135779	0.188494	0.193566	0.192822	0.1322	0.171479	0.159165	0.149722			512	0.693471	0.710049	0.513882	0.519038	0.710334	0.635849	0.648562	0.5064					512	0.469468	0.447908
512.2	0.375586	0.38079	0.383082	0.252096	0.249762	0.251858	0.332144	0.314337	0.351379	0.251966	0.236998	0.23334			512.2	0.165163	0.187567	0.204141	0.200728	0.159789	0.158834	0.173252	0.160346	0.13953	0.193368	0.198296	0.197728	0.135564	0.176012	0.163085	0.153667			512.2	0.701785	0.71881	0.520183	0.525188	0.718546	0.643634	0.656291	0.512824					512.2	0.478692	0.456436
512.4	0.379562	0.384876	0.387195	0.255171	0.252825	0.254923	0.335819	0.317734	0.355364	0.255215	0.239633	0.236002			512.4	0.16717	0.189903	0.206559	0.203183	0.161787	0.160814	0.175329	0.162417	0.141346	0.195856	0.200728	0.200341	0.137164	0.17814	0.165014	0.155652			512.4	0.705914	0.723134	0.523304	0.528373	0.722872	0.647355	0.660231	0.516011					512.4	0.483496	0.461022
512.6	0.387738	0.393002	0.395421	0.261285	0.259038	0.261027	0.343057	0.324277	0.363136	0.261241	0.245464	0.241716			512.6	0.171409	0.194679	0.211411	0.208338	0.165983	0.165001	0.179445	0.166451	0.144823	0.200846	0.205659	0.205296	0.140736	0.1827	0.169	0.159562			512.6	0.714012	0.731833	0.529471	0.534404	0.731092	0.654896	0.667881	0.52201					512.6	0.493311	0.46962
512.8	0.391936	0.396924	0.399276	0.264257	0.26226	0.264063	0.346795	0.327548	0.366826	0.264298	0.248314	0.244411			512.8	0.173584	0.19705	0.213869	0.210975	0.168082	0.167129	0.181371	0.168578	0.146694	0.203304	0.208049	0.207877	0.142635	0.184909	0.171059	0.161674			512.8	0.718243	0.735974	0.53258	0.537516	0.735156	0.658654	0.67162	0.52503					512.8	0.498396	0.473869
513	0.399996	0.404947	0.407695	0.270537	0.268718	0.269998	0.354317	0.334396	0.374228	0.270594	0.254216	0.250411			513	0.177866	0.201859	0.218773	0.215995	0.17231	0.171025	0.185768	0.172772	0.150405	0.208396	0.212859	0.213002	0.146175	0.189635	0.175	0.165784			513	0.726305	0.74446	0.538776	0.543653	0.743208	0.666244	0.679304	0.531091					513	0.508195	0.482892
513.2	0.403999	0.408867	0.411935	0.273817	0.271791	0.273222	0.358001	0.33761	0.378157	0.273549	0.257025	0.253209			513.2	0.180147	0.204377	0.221229	0.218506	0.174476	0.173229	0.187932	0.174892	0.152184	0.210793	0.215306	0.215536	0.147935	0.191885	0.177094	0.167833			513.2	0.730402	0.748719	0.541818	0.546673	0.747277	0.669835	0.68306	0.534095					513.2	0.51303	0.487008
513.4	0.412439	0.416932	0.420131	0.28019	0.278067	0.279047	0.365251	0.344468	0.386327	0.279682	0.262999	0.258942			513.4	0.184643	0.209428	0.226385	0.223764	0.178858	0.177462	0.192475	0.179035	0.15567	0.216034	0.220035	0.220939	0.151639	0.196702	0.181179	0.171933			513.4	0.738358	0.756963	0.547742	0.552773	0.755164	0.676947	0.690539	0.53982					513.4	0.52266	0.496177
513.6	0.419271	0.423764	0.427023	0.285424	0.283216	0.284177	0.371513	0.350017	0.392623	0.284956	0.267988	0.263616			513.6	0.188214	0.213738	0.230622	0.228019	0.182346	0.181028	0.196188	0.182561	0.158828	0.220401	0.224117	0.225425	0.154768	0.20077	0.184512	0.175545			513.6	0.745066	0.763721	0.552648	0.557569	0.761377	0.682656	0.696669	0.544493					513.6	0.530491	0.503521
513.8	0.424624	0.429324	0.432829	0.289663	0.287569	0.288354	0.376403	0.354513	0.397914	0.289097	0.272058	0.267572			513.8	0.191166	0.217267	0.234075	0.231611	0.185217	0.183929	0.199149	0.185432	0.161304	0.223816	0.22726	0.229164	0.157242	0.204152	0.187267	0.178442			513.8	0.750282	0.769095	0.556693	0.561574	0.766466	0.687332	0.701565	0.548298					513.8	0.536773	0.509342
514	0.431345	0.436024	0.439766	0.295174	0.292668	0.293697	0.382436	0.360499	0.404204	0.294265	0.277029	0.272315			514	0.194801	0.221527	0.238346	0.235982	0.188842	0.187593	0.20285	0.189063	0.164412	0.228176	0.231405	0.233738	0.160436	0.208175	0.190803	0.181944			514	0.756505	0.775695	0.561445	0.566436	0.77277	0.692995	0.707396	0.552971					514	0.544666	0.517051
514.2	0.43678	0.441552	0.445436	0.299482	0.296793	0.29785	0.387293	0.365261	0.409396	0.298578	0.28117	0.276086			514.2	0.197803	0.225097	0.241905	0.239629	0.191666	0.190568	0.205741	0.191984	0.166949	0.231805	0.234754	0.237333	0.163058	0.21144	0.193631	0.184722			514.2	0.761454	0.781098	0.565289	0.570245	0.777711	0.697605	0.712132	0.556797					514.2	0.550972	0.523211
514.4	0.443669	0.44838	0.452565	0.3048	0.302189	0.303414	0.393401	0.370817	0.415833	0.303824	0.286456	0.281028			514.4	0.201665	0.229296	0.246223	0.244202	0.195449	0.194275	0.209533	0.195623	0.170122	0.236319	0.238954	0.242018	0.166232	0.215685	0.197109	0.188225			514.4	0.767791	0.787656	0.5699	0.574872	0.783694	0.703236	0.718043	0.561345					514.4	0.558733	0.530434
514.6	0.449076	0.454053	0.458345	0.308803	0.306493	0.307663	0.39831	0.375287	0.421021	0.307911	0.290532	0.284827			514.6	0.204763	0.232768	0.249724	0.247813	0.198425	0.197192	0.212548	0.198679	0.172633	0.239863	0.242279	0.245727	0.168626	0.21905	0.199868	0.191054			514.6	0.772667	0.792826	0.573615	0.578618	0.78854	0.707722	0.722713	0.564919					514.6	0.564996	0.536168
514.8	0.456086	0.46084	0.465452	0.314104	0.311983	0.313107	0.404526	0.381148	0.42768	0.313395	0.29574	0.289703			514.8	0.208491	0.237076	0.254134	0.252592	0.202179	0.20092	0.216344	0.202487	0.175854	0.244331	0.246647	0.250305	0.171793	0.223249	0.20349	0.194672			514.8	0.778754	0.799135	0.578074	0.583255	0.794482	0.713151	0.728532	0.569431					514.8	0.572652	0.543556
515	0.461668	0.466367	0.471232	0.318415	0.316168	0.317446	0.409651	0.385904	0.432805	0.31783	0.299756	0.293867			515	0.211619	0.240569	0.257766	0.256581	0.205015	0.203878	0.21945	0.205429	0.178475	0.24795	0.250156	0.253893	0.174199	0.226731	0.206371	0.197543			515	0.783619	0.804336	0.581691	0.586959	0.799269	0.717425	0.733108	0.573009					515	0.578747	0.549371
515.2	0.468641	0.473382	0.478093	0.323893	0.321866	0.322824	0.416083	0.391727	0.439543	0.323024	0.305013	0.298863			515.2	0.215445	0.24496	0.262176	0.261169	0.208686	0.207709	0.223503	0.209027	0.181675	0.252617	0.254527	0.258485	0.177419	0.23103	0.209945	0.201056			515.2	0.789716	0.810633	0.586481	0.591415	0.805261	0.722626	0.738722	0.577334					515.2	0.586838	0.556453
515.4	0.474362	0.478838	0.483587	0.328248	0.326398	0.327034	0.421231	0.396376	0.44463	0.327082	0.309225	0.302854			515.4	0.218603	0.248511	0.265691	0.264785	0.211737	0.210812	0.226719	0.211988	0.184233	0.256387	0.258059	0.262246	0.180054	0.234542	0.212772	0.203922			515.4	0.794617	0.815706	0.59018	0.594992	0.809968	0.727001	0.743028	0.580947					515.4	0.593588	0.562237
515.6	0.481442	0.485662	0.490337	0.333698	0.331639	0.332363	0.427496	0.402211	0.451223	0.332439	0.314088	0.307974			515.6	0.22262	0.253147	0.270062	0.269508	0.215582	0.214711	0.230706	0.215812	0.187453	0.261223	0.262433	0.267115	0.183272	0.238915	0.216342	0.207691			515.6	0.800734	0.821715	0.594679	0.599283	0.815687	0.732119	0.748708	0.585162					515.6	0.601608	0.56978
515.8	0.486967	0.491213	0.49599	0.338002	0.33596	0.336853	0.432455	0.407089	0.45646	0.336855	0.318338	0.312077			515.8	0.225817	0.256936	0.273685	0.273227	0.218762	0.217947	0.2339	0.21902	0.189998	0.265085	0.266093	0.270824	0.185822	0.242621	0.21922	0.210499			515.8	0.805546	0.826395	0.598273	0.602748	0.820193	0.736181	0.753256	0.588447					515.8	0.608187	0.576005
516	0.492429	0.497012	0.501494	0.342534	0.340416	0.341282	0.437499	0.411631	0.461653	0.341468	0.322585	0.316			516	0.229	0.260569	0.277384	0.277083	0.221867	0.221045	0.237129	0.222208	0.192921	0.268782	0.269663	0.2749	0.1884	0.246122	0.22215	0.213497			516	0.810229	0.83118	0.6017	0.606291	0.824829	0.740282	0.757693	0.591995					516	0.61409	0.581842
516.2	0.499459	0.504307	0.508754	0.347982	0.345807	0.346776	0.443631	0.417386	0.468317	0.347159	0.327828	0.32098			516.2	0.232937	0.265124	0.282023	0.281929	0.225712	0.224874	0.241326	0.226034	0.196338	0.273547	0.274096	0.279957	0.191586	0.250609	0.225745	0.217311			516.2	0.816073	0.837283	0.605926	0.610641	0.830358	0.745258	0.763106	0.596376					516.2	0.621508	0.589266
516.4	0.505103	0.510046	0.514196	0.35223	0.350148	0.351291	0.448583	0.421958	0.473796	0.351509	0.332261	0.325124			516.4	0.236258	0.268821	0.28588	0.28584	0.228856	0.228074	0.244501	0.229271	0.199024	0.27735	0.27773	0.283802	0.194281	0.254168	0.228787	0.220376			516.4	0.820666	0.841938	0.609382	0.613989	0.83471	0.749104	0.76738	0.599715					516.4	0.627885	0.595291
516.6	0.51211	0.517524	0.521122	0.357656	0.355587	0.356658	0.454739	0.427836	0.480463	0.356993	0.337852	0.33024			516.6	0.240359	0.273482	0.290629	0.290682	0.23269	0.232064	0.248425	0.233347	0.202561	0.282236	0.282354	0.288671	0.197766	0.258567	0.232477	0.224161			516.6	0.826307	0.847774	0.613624	0.618255	0.840085	0.75407	0.772624	0.603999					516.6	0.635913	0.603137
516.8	0.517532	0.523325	0.526781	0.362045	0.359878	0.361124	0.459655	0.432508	0.485639	0.361386	0.341997	0.334263			516.8	0.24358	0.277157	0.294397	0.294708	0.235933	0.235302	0.251612	0.236645	0.205366	0.286085	0.286139	0.292624	0.200488	0.262075	0.235578	0.227294			516.8	0.830796	0.852427	0.617091	0.621438	0.844341	0.758023	0.776996	0.607415					516.8	0.642387	0.608855
517	0.524496	0.530333	0.533855	0.36749	0.365376	0.366737	0.465662	0.438432	0.492226	0.366836	0.347384	0.339353			517	0.247679	0.281771	0.299089	0.299969	0.240004	0.239364	0.255732	0.240622	0.208829	0.290918	0.29074	0.297564	0.203872	0.266557	0.239424	0.231235			517	0.836357	0.858293	0.621285	0.625545	0.849714	0.762962	0.782265	0.611677					517	0.650177	0.616167
517.2	0.532852	0.53858	0.542234	0.374142	0.372022	0.373579	0.473065	0.44536	0.500093	0.373697	0.353703	0.345252			517.2	0.252783	0.287379	0.304601	0.305966	0.244751	0.244133	0.260677	0.245513	0.213132	0.296598	0.296252	0.303498	0.207959	0.271786	0.244055	0.235607			517.2	0.842828	0.865048	0.626245	0.630371	0.856045	0.768658	0.788537	0.616565					517.2	0.659667	0.625204
517.4	0.537223	0.542853	0.546634	0.377304	0.375339	0.376845	0.476845	0.448733	0.50411	0.376968	0.357118	0.34831			517.4	0.25537	0.290198	0.307422	0.309148	0.247158	0.246564	0.263227	0.248058	0.215162	0.299563	0.299059	0.306491	0.210004	0.274655	0.246481	0.238129			517.4	0.846103	0.868627	0.628685	0.632782	0.859074	0.771517	0.791542	0.61909					517.4	0.664354	0.629168
517.6	0.546011	0.551153	0.55524	0.383963	0.382013	0.383839	0.484228	0.455764	0.511727	0.383506	0.363762	0.354724			517.6	0.260289	0.295691	0.313006	0.3152	0.252333	0.251251	0.268383	0.25307	0.219496	0.305414	0.304688	0.312639	0.214256	0.28016	0.251037	0.242853			517.6	0.852915	0.875335	0.633804	0.63764	0.865581	0.777238	0.797873	0.623851					517.6	0.673971	0.637871
517.8	0.550307	0.555339	0.559402	0.387361	0.385204	0.38707	0.48781	0.459319	0.515626	0.386877	0.366994	0.358016			517.8	0.262994	0.298581	0.315907	0.318342	0.254615	0.253646	0.270957	0.25562	0.221586	0.308307	0.307533	0.315714	0.216304	0.28294	0.25337	0.245347			517.8	0.856264	0.878763	0.636386	0.640144	0.868844	0.780021	0.80085	0.62635					517.8	0.67888	0.642321
518	0.559342	0.564121	0.56836	0.394421	0.392044	0.393795	0.495213	0.466283	0.523583	0.393787	0.373795	0.364188			518	0.267787	0.304338	0.321646	0.324804	0.259446	0.258738	0.276239	0.260398	0.225853	0.314379	0.313357	0.321908	0.220696	0.288599	0.258247	0.250149			518	0.862726	0.885545	0.641329	0.64497	0.875238	0.78576	0.807412	0.631179					518	0.688197	0.650907
518.2	0.563527	0.568328	0.572721	0.397949	0.39518	0.39712	0.499106	0.469735	0.52738	0.397232	0.377142	0.367432			518.2	0.27034	0.307175	0.324569	0.327927	0.261801	0.26121	0.278928	0.262879	0.228131	0.317438	0.316131	0.325192	0.222847	0.291474	0.260617	0.25263			518.2	0.865989	0.889021	0.643894	0.647371	0.878267	0.78854	0.810323	0.633542					518.2	0.692874	0.655276
518.4	0.572319	0.577041	0.580952	0.404668	0.402203	0.403885	0.506874	0.476637	0.535605	0.403903	0.383742	0.373243			518.4	0.275731	0.313026	0.330407	0.334085	0.267119	0.266512	0.284197	0.268064	0.2325	0.323395	0.321732	0.331438	0.227325	0.297026	0.265318	0.257355			518.4	0.872549	0.895754	0.648782	0.652028	0.884418	0.794164	0.816541	0.638329					518.4	0.702256	0.663881
518.6	0.576684	0.581202	0.58516	0.408043	0.405417	0.407201	0.510565	0.48011	0.539623	0.407296	0.387045	0.376333			518.6	0.2784	0.315922	0.333527	0.33724	0.269844	0.268951	0.286757	0.270666	0.234748	0.326398	0.324529	0.334519	0.229489	0.29982	0.267598	0.259978			518.6	0.87562	0.899178	0.651323	0.654449	0.887351	0.797237	0.819493	0.640966					518.6	0.70686	0.668344
518.8	0.585373	0.590118	0.593748	0.41504	0.412171	0.41429	0.517875	0.487252	0.547415	0.414152	0.393891	0.382336			518.8	0.283757	0.321997	0.339503	0.343451	0.274922	0.27401	0.291833	0.275782	0.239183	0.332443	0.330338	0.34096	0.233588	0.305342	0.272416	0.264867			518.8	0.881881	0.905522	0.656109	0.659464	0.893653	0.802973	0.825718	0.645828					518.8	0.715673	0.677131
519	0.589385	0.594736	0.598312	0.418449	0.415828	0.417727	0.521693	0.49089	0.551496	0.417607	0.397665	0.38561			519	0.286418	0.324938	0.342547	0.346719	0.2774	0.2766	0.294443	0.278381	0.241486	0.335408	0.333209	0.343811	0.235716	0.308223	0.274826	0.267327			519	0.885058	0.908768	0.658516	0.661947	0.896614	0.805839	0.828636	0.648216					519	0.720741	0.681586
519.2	0.597955	0.603292	0.606927	0.425343	0.422729	0.424464	0.529254	0.497621	0.559466	0.424124	0.404794	0.391671			519.2	0.291981	0.331042	0.34853	0.353283	0.28249	0.281632	0.299659	0.283464	0.246085	0.341466	0.338939	0.35045	0.240205	0.313851	0.279794	0.272607			519.2	0.891312	0.915663	0.663147	0.666809	0.902736	0.811254	0.834508	0.653094					519.2	0.730035	0.689891
519.4	0.602351	0.60737	0.611348	0.428609	0.42608	0.427873	0.53318	0.501225	0.563333	0.427459	0.408193	0.39486			519.4	0.294686	0.334159	0.351587	0.356535	0.285082	0.284193	0.302424	0.285975	0.248202	0.344703	0.341867	0.353445	0.242401	0.316702	0.282252	0.275225			519.4	0.894627	0.918715	0.665577	0.669146	0.905985	0.813964	0.837365	0.655467					519.4	0.735	0.694122
519.6	0.610785	0.615767	0.62046	0.435723	0.433069	0.435126	0.540961	0.508585	0.571297	0.434095	0.415308	0.400985			519.6	0.300166	0.340395	0.3577	0.363154	0.290276	0.289407	0.307643	0.291183	0.252842	0.351119	0.347893	0.359563	0.246846	0.322634	0.2874	0.280199			519.6	0.900894	0.925155	0.670405	0.673692	0.912153	0.819375	0.843584	0.660243					519.6	0.74454	0.702912
519.8	0.614951	0.620072	0.624912	0.439085	0.436511	0.438661	0.544849	0.512148	0.575137	0.437433	0.41859	0.403959			519.8	0.302809	0.34357	0.360803	0.366518	0.292747	0.291942	0.310315	0.293662	0.255306	0.354347	0.35101	0.362865	0.249068	0.325572	0.289882	0.282616			519.8	0.903974	0.928463	0.672731	0.67617	0.915487	0.822112	0.846711	0.662579					519.8	0.749261	0.707214
520	0.623516	0.628382	0.633743	0.446199	0.443693	0.445557	0.552253	0.519093	0.582906	0.444164	0.425052	0.410294			520	0.30836	0.349956	0.367051	0.373078	0.297956	0.297455	0.315879	0.298731	0.259746	0.360555	0.356803	0.369455	0.253659	0.331437	0.294729	0.287751			520	0.910242	0.935063	0.677567	0.680864	0.921914	0.827561	0.85279	0.667246					520	0.758547	0.715491
520.2	0.631008	0.635681	0.640654	0.452056	0.449611	0.45129	0.558832	0.524751	0.589709	0.449673	0.430837	0.415614			520.2	0.313003	0.35506	0.372189	0.378568	0.302279	0.301861	0.320353	0.30309	0.263625	0.365942	0.361641	0.374813	0.257378	0.336428	0.29898	0.29201			520.2	0.915497	0.940485	0.681424	0.684907	0.92701	0.832292	0.857759	0.671033					520.2	0.766453	0.722814
520.4	0.636804	0.641497	0.646428	0.45702	0.454287	0.455987	0.564107	0.529435	0.595031	0.454198	0.435218	0.420034			520.4	0.316798	0.359324	0.376309	0.38295	0.3059	0.305374	0.324105	0.306645	0.266694	0.370316	0.365676	0.379216	0.260398	0.340396	0.302494	0.295519			520.4	0.919625	0.9447	0.684689	0.688045	0.931235	0.835982	0.861777	0.674219					520.4	0.772787	0.728668
520.6	0.644126	0.649004	0.653582	0.462871	0.460198	0.461714	0.570737	0.535194	0.601759	0.459746	0.441093	0.425393			520.6	0.321473	0.364715	0.381564	0.388488	0.310473	0.309831	0.328779	0.311026	0.270502	0.376127	0.370808	0.384766	0.264156	0.345757	0.306893	0.299721			520.6	0.925058	0.950135	0.688629	0.691942	0.936515	0.840542	0.86679	0.678147					520.6	0.780614	0.736373
520.8	0.649975	0.655096	0.6591	0.46753	0.464885	0.46671	0.575914	0.540055	0.607199	0.464362	0.445749	0.429602			520.8	0.325103	0.368973	0.385797	0.393043	0.314148	0.313538	0.332514	0.314568	0.273734	0.380654	0.374824	0.389126	0.266989	0.349867	0.31029	0.303029			520.8	0.929444	0.954345	0.691857	0.69515	0.940874	0.844242	0.870791	0.681208					520.8	0.786654	0.742406
521	0.657329	0.662796	0.666511	0.473327	0.470819	0.472353	0.582235	0.545896	0.614135	0.470071	0.450912	0.434835			521	0.329949	0.374343	0.391389	0.398717	0.318817	0.318088	0.33701	0.319015	0.277642	0.3863	0.379758	0.394956	0.270682	0.354887	0.314723	0.307453			521	0.934931	0.959846	0.695875	0.699266	0.945999	0.848835	0.875895	0.68509					521	0.794256	0.749281
521.2	0.663159	0.668806	0.672535	0.478076	0.475728	0.476752	0.587376	0.550742	0.619781	0.474543	0.455244	0.438763			521.2	0.333768	0.378753	0.395835	0.403533	0.32251	0.321791	0.340669	0.3225	0.28073	0.39077	0.38394	0.399588	0.273819	0.358914	0.318184	0.311031			521.2	0.939269	0.96424	0.698977	0.70241	0.949951	0.852641	0.879908	0.688175					521.2	0.800547	0.754848
521.4	0.668818	0.674486	0.678056	0.482828	0.480502	0.481512	0.592713	0.555766	0.625302	0.478988	0.459692	0.443088			521.4	0.337772	0.383107	0.400145	0.408128	0.326385	0.32538	0.344287	0.326157	0.284052	0.395212	0.388138	0.404177	0.27685	0.363033	0.32167	0.314639			521.4	0.943466	0.968823	0.702041	0.705531	0.954024	0.856354	0.883669	0.691363					521.4	0.807017	0.760712
521.6	0.676166	0.682129	0.685113	0.488575	0.48658	0.48719	0.599172	0.562028	0.632411	0.484653	0.464997	0.44837			521.6	0.342701	0.388776	0.405674	0.41387	0.331339	0.330068	0.348784	0.33072	0.287995	0.400831	0.393495	0.409668	0.28073	0.3682	0.325963	0.319068			521.6	0.948766	0.974439	0.70584	0.7096	0.959308	0.860973	0.888549	0.695302					521.6	0.815149	0.768131
521.8	0.681894	0.68801	0.691066	0.493359	0.491155	0.491967	0.604118	0.566679	0.637887	0.489238	0.469542	0.452871			521.8	0.346609	0.393371	0.410037	0.418566	0.334994	0.333575	0.352453	0.33443	0.291142	0.405566	0.397873	0.414422	0.283818	0.372464	0.329438	0.322672			521.8	0.953018	0.978808	0.70916	0.71277	0.96361	0.86468	0.892638	0.698398					521.8	0.821444	0.774004
522	0.689121	0.695487	0.698784	0.499368	0.497119	0.49799	0.610412	0.572938	0.644592	0.495165	0.475161	0.45838			522	0.351721	0.399129	0.415515	0.424676	0.339497	0.338317	0.357127	0.33916	0.295158	0.411224	0.403182	0.420444	0.287701	0.377707	0.334	0.327083			522	0.958728	0.984265	0.713073	0.716739	0.968876	0.869177	0.897956	0.702246					522	0.829448	0.781478
522.2	0.694916	0.701492	0.704923	0.504008	0.501885	0.502554	0.615512	0.577764	0.65044	0.499848	0.47975	0.462861			522.2	0.355792	0.40363	0.420161	0.429499	0.343509	0.342051	0.361015	0.343012	0.298534	0.415934	0.407517	0.425089	0.290862	0.382033	0.337632	0.330878			522.2	0.963215	0.988878	0.716402	0.71977	0.972936	0.872842	0.902099	0.705294					522.2	0.835868	0.787546
522.4	0.702436	0.708516	0.712429	0.509865	0.507701	0.508467	0.621777	0.583765	0.657548	0.505667	0.485459	0.468295			522.4	0.360753	0.409322	0.425791	0.435563	0.348459	0.346809	0.365992	0.347884	0.30257	0.421907	0.413023	0.431281	0.294837	0.387421	0.342224	0.335518			522.4	0.968542	0.994564	0.720613	0.723745	0.978243	0.877534	0.907405	0.70925					522.4	0.843362	0.795092
522.6	0.70862	0.714633	0.718374	0.51458	0.512454	0.513248	0.627195	0.588552	0.662998	0.510482	0.489747	0.472693			522.6	0.364702	0.413783	0.430443	0.440546	0.352359	0.350765	0.369957	0.351655	0.305921	0.426866	0.417516	0.435751	0.298101	0.391656	0.345969	0.339228			522.6	0.972861	0.998914	0.723959	0.726937	0.982627	0.88146	0.911628	0.712458					522.6	0.849605	0.80104
522.8	0.716312	0.722564	0.725977	0.52049	0.518613	0.519211	0.633929	0.594536	0.66995	0.516516	0.495234	0.478271			522.8	0.369782	0.419447	0.436293	0.446648	0.357186	0.355692	0.374797	0.356425	0.310236	0.432988	0.423106	0.442035	0.302187	0.396987	0.350649	0.343866			522.8	0.97809	1.00464	0.728188	0.731091	0.988084	0.886301	0.91706	0.716432					522.8	0.857489	0.80887
523	0.725298	0.732034	0.735146	0.527675	0.525768	0.526302	0.641713	0.601862	0.678405	0.523566	0.501852	0.4852			523	0.376282	0.426483	0.443223	0.454113	0.36307	0.361778	0.380818	0.362495	0.315124	0.440034	0.429827	0.449526	0.307519	0.403296	0.356249	0.349355			523	0.984627	1.01159	0.733271	0.736524	0.994633	0.892095	0.923254	0.721276					523	0.867482	0.818264
523.2	0.73003	0.736803	0.739803	0.53155	0.529598	0.529933	0.645847	0.605548	0.682813	0.526949	0.505399	0.488597			523.2	0.379391	0.429948	0.446703	0.458073	0.366132	0.364885	0.383877	0.365519	0.31748	0.443586	0.433034	0.453262	0.309998	0.406668	0.359263	0.352255			523.2	0.988228	1.01496	0.735803	0.739109	0.997967	0.895057	0.926341	0.723824					523.2	0.872143	0.822717
523.4	0.739286	0.746194	0.748985	0.538601	0.53711	0.537367	0.65404	0.613144	0.691156	0.534229	0.512476	0.494929			523.4	0.385806	0.437021	0.453771	0.465675	0.37232	0.3708	0.389972	0.371527	0.322835	0.451076	0.440338	0.46073	0.314766	0.413609	0.365136	0.358106			523.4	0.994887	1.02177	0.740906	0.744206	1.00463	0.901058	0.932692	0.728848					523.4	0.882229	0.831534
523.6	0.743907	0.750885	0.754144	0.542389	0.540871	0.541226	0.658158	0.617138	0.695254	0.53821	0.515872	0.498388			523.6	0.389142	0.440811	0.457425	0.469725	0.375469	0.37384	0.393066	0.374609	0.325437	0.45471	0.443858	0.464448	0.317386	0.41711	0.367954	0.361065			523.6	0.998328	1.02537	0.743753	0.74671	1.00822	0.903834	0.935746	0.731358					523.6	0.887097	0.835981
523.8	0.753236	0.760599	0.764072	0.549486	0.548333	0.548567	0.666066	0.624785	0.703818	0.545693	0.523173	0.505152			523.8	0.396085	0.448378	0.464938	0.477778	0.381657	0.380174	0.399115	0.380901	0.33071	0.462361	0.451003	0.472248	0.322522	0.423877	0.373646	0.366809			523.8	1.00507	1.03246	0.749235	0.752116	1.01508	0.909894	0.94229	0.736298					523.8	0.897004	0.845349
524	0.758002	0.765177	0.768618	0.553323	0.551938	0.552407	0.669923	0.628849	0.708224	0.549388	0.526623	0.508581			524	0.39924	0.452139	0.46868	0.481841	0.384755	0.383214	0.402115	0.384063	0.333522	0.466126	0.454563	0.476174	0.325081	0.427155	0.376366	0.369922			524	1.0085	1.03613	0.751876	0.754718	1.01851	0.912928	0.945485	0.738797					524	0.901995	0.849743
524.2	0.767394	0.774303	0.778777	0.56069	0.559263	0.559569	0.678024	0.636629	0.716535	0.556876	0.533394	0.515435			524.2	0.406083	0.459893	0.47602	0.49006	0.390875	0.389447	0.408368	0.390383	0.338979	0.473936	0.461958	0.483956	0.330574	0.434021	0.382431	0.37626			524.2	1.01525	1.0436	0.757019	0.760096	1.02532	0.919044	0.952011	0.743982					524.2	0.912489	0.858486
524.4	0.772027	0.778737	0.78366	0.564557	0.563235	0.563273	0.682153	0.640443	0.720805	0.560854	0.537113	0.518524			524.4	0.409586	0.463783	0.479737	0.494313	0.393987	0.392783	0.411711	0.393595	0.341751	0.477761	0.46558	0.487723	0.333437	0.437586	0.385439	0.3793			524.4	1.01872	1.04726	0.759701	0.762732	1.02855	0.922154	0.955349	0.746534					524.4	0.917841	0.862996
524.6	0.781407	0.787993	0.79284	0.572025	0.570659	0.571309	0.690765	0.648064	0.729309	0.568405	0.54469	0.525919			524.6	0.416292	0.471509	0.487447	0.50235	0.400537	0.399572	0.418379	0.400138	0.347418	0.48596	0.472769	0.49566	0.338762	0.44469	0.391516	0.38551			524.6	1.02564	1.05415	0.765007	0.768269	1.03564	0.928157	0.962452	0.751767					524.6	0.927836	0.872888
524.8	0.786385	0.792673	0.797876	0.575947	0.574389	0.57509	0.695013	0.652249	0.733505	0.572191	0.548162	0.529275			524.8	0.420005	0.475326	0.491292	0.506437	0.403547	0.403059	0.421876	0.403309	0.350287	0.490023	0.476474	0.499699	0.341534	0.448313	0.39466	0.388453			524.8	1.02941	1.05768	0.767773	0.771138	1.03918	0.931153	0.965862	0.754273					524.8	0.932666	0.87781
525	0.795817	0.801899	0.807998	0.583609	0.582231	0.58282	0.702885	0.659972	0.741935	0.579951	0.555434	0.536079			525	0.427056	0.48314	0.499086	0.514803	0.410055	0.409486	0.428628	0.409959	0.355913	0.498065	0.483924	0.507917	0.34701	0.455371	0.400933	0.394899			525	1.03668	1.0648	0.77344	0.776452	1.04634	0.937276	0.97253	0.759323					525	0.942957	0.887212
525.2	0.80088	0.806749	0.812897	0.587526	0.586042	0.586823	0.707247	0.664008	0.746232	0.583704	0.558896	0.539539			525.2	0.430448	0.487073	0.503096	0.519148	0.413386	0.412917	0.432133	0.413149	0.358992	0.501906	0.487601	0.512134	0.349864	0.459053	0.40402	0.398103			525.2	1.04025	1.0685	0.776254	0.779149	1.04975	0.94033	0.975914	0.762041					525.2	0.94803	0.891732
525.4	0.81034	0.816636	0.822804	0.595091	0.594014	0.594369	0.716004	0.671735	0.754891	0.591396	0.566302	0.546439			525.4	0.4374	0.494992	0.510962	0.527604	0.420309	0.419766	0.438998	0.419529	0.364857	0.509963	0.495276	0.52031	0.355831	0.466275	0.410493	0.404537			525.4	1.04722	1.07567	0.781771	0.78452	1.05692	0.946601	0.982662	0.767183					525.4	0.958631	0.901074
525.6	0.818452	0.824857	0.8308	0.601584	0.600542	0.600582	0.723483	0.678329	0.761537	0.597851	0.572319	0.552224			525.6	0.443204	0.501963	0.517429	0.534752	0.425978	0.425393	0.444732	0.425032	0.369561	0.516846	0.501742	0.527449	0.361019	0.472409	0.415864	0.409811			525.6	1.05287	1.08203	0.786269	0.789096	1.06296	0.951698	0.98824	0.771586					525.6	0.967426	0.90878
525.8	0.825012	0.831659	0.837263	0.606923	0.605838	0.605706	0.729439	0.683859	0.767477	0.60294	0.577013	0.556886			525.8	0.44792	0.507556	0.522754	0.540641	0.430619	0.430105	0.449297	0.429605	0.373522	0.522258	0.506954	0.533316	0.365183	0.47739	0.420088	0.414051			525.8	1.05761	1.08706	0.789998	0.792818	1.06769	0.955809	0.992668	0.775011					525.8	0.973978	0.914982
526	0.833203	0.839912	0.845656	0.613671	0.612367	0.612267	0.736321	0.690854	0.775094	0.60933	0.583207	0.562594			526	0.453995	0.514413	0.529518	0.547831	0.436459	0.435735	0.454922	0.435416	0.378657	0.528992	0.513581	0.540722	0.370165	0.483841	0.425549	0.41944			526	1.06381	1.09346	0.794662	0.797512	1.07367	0.961068	0.998493	0.779268					526	0.982485	0.923001
526.2	0.8397	0.846289	0.852314	0.619015	0.617617	0.617504	0.741956	0.696371	0.781272	0.614321	0.588147	0.567168			526.2	0.458697	0.520113	0.534881	0.553563	0.441109	0.440305	0.459572	0.440163	0.382645	0.5346	0.518793	0.546539	0.374019	0.489221	0.429753	0.423801			526.2	1.06868	1.09856	0.798309	0.80115	1.07854	0.96515	1.00299	0.782677					526.2	0.989111	0.92947
526.4	0.846193	0.852626	0.858711	0.624245	0.622746	0.622705	0.747545	0.701787	0.787208	0.619414	0.59303	0.57184			526.4	0.463479	0.525813	0.540213	0.559341	0.44592	0.444928	0.464279	0.444693	0.386694	0.540157	0.524026	0.552278	0.37779	0.494502	0.43421	0.428292			526.4	1.07372	1.10346	0.802009	0.804602	1.08328	0.969373	1.0075	0.786196					526.4	0.995618	0.935295
526.6	0.85435	0.860818	0.866911	0.630802	0.629259	0.62915	0.754602	0.708543	0.794127	0.626132	0.598832	0.578108			526.6	0.469649	0.532864	0.546943	0.566693	0.451897	0.450807	0.470147	0.450472	0.391881	0.547168	0.530564	0.559597	0.382587	0.500875	0.439679	0.434023			526.6	1.07972	1.10973	0.806696	0.809073	1.08902	0.974831	1.01318	0.790468					526.6	1.00417	0.942678
526.8	0.860975	0.867258	0.873488	0.63621	0.634413	0.634212	0.760257	0.713997	0.80035	0.631384	0.603681	0.582818			526.8	0.474699	0.538534	0.552231	0.572764	0.456865	0.455577	0.474968	0.455338	0.396084	0.55289	0.535738	0.565463	0.386776	0.505885	0.444148	0.438478			526.8	1.08461	1.11486	0.810343	0.81277	1.09383	0.978826	1.01764	0.793826					526.8	1.01067	0.949099
527	0.869171	0.875288	0.881661	0.642766	0.640605	0.640538	0.767532	0.720787	0.808219	0.637737	0.609862	0.588833			527	0.481073	0.545809	0.559197	0.580219	0.463224	0.461605	0.481026	0.461347	0.401561	0.560111	0.542424	0.572798	0.391911	0.512212	0.449623	0.444273			527	1.09067	1.12114	0.814771	0.817417	1.09983	0.983939	1.02312	0.798123					527	1.01921	0.956795
527.2	0.875757	0.88154	0.887978	0.647992	0.646037	0.645787	0.773275	0.72618	0.814205	0.642968	0.614727	0.593466			527.2	0.485974	0.551464	0.564804	0.586268	0.467763	0.46619	0.485765	0.466183	0.405763	0.56583	0.547825	0.578965	0.39628	0.51743	0.454023	0.448801			527.2	1.09546	1.12626	0.818264	0.820957	1.10446	0.987968	1.02781	0.801581					527.2	1.02617	0.962813
527.4	0.883644	0.88953	0.896213	0.654428	0.652668	0.652453	0.780496	0.73267	0.821674	0.649591	0.621006	0.598936			527.4	0.492323	0.558738	0.571746	0.593631	0.473677	0.472145	0.491643	0.472221	0.410917	0.573038	0.554695	0.586717	0.401647	0.52406	0.459727	0.454455			527.4	1.10157	1.13232	0.822865	0.825615	1.11029	0.99303	1.03388	0.805933					527.4	1.03457	0.970461
527.6	0.889918	0.896052	0.902463	0.659739	0.657966	0.657692	0.786331	0.737888	0.827563	0.654697	0.625949	0.603345			527.6	0.497372	0.564394	0.577426	0.599635	0.478637	0.476987	0.496549	0.477041	0.415107	0.578674	0.560182	0.592828	0.405745	0.52936	0.464164	0.458911			527.6	1.10633	1.13715	0.826515	0.82925	1.11485	0.997213	1.03863	0.809421					527.6	1.04122	0.976638
527.8	0.897771	0.904296	0.910287	0.66617	0.664353	0.664162	0.793578	0.744549	0.834791	0.660847	0.632085	0.609111			527.8	0.503624	0.571532	0.584449	0.607085	0.484751	0.482942	0.50255	0.483059	0.420363	0.585937	0.567081	0.600542	0.410848	0.535942	0.469823	0.464531			527.8	1.1122	1.14318	0.83112	0.83372	1.12084	1.0023	1.04436	0.813692					527.8	1.04952	0.984571
528	0.907341	0.914187	0.920043	0.674161	0.67244	0.671761	0.802178	0.752478	0.843421	0.668343	0.63907	0.615982			528	0.511642	0.580259	0.593012	0.616408	0.492103	0.490048	0.509655	0.490332	0.426696	0.59431	0.575583	0.609658	0.416919	0.544017	0.476467	0.471466			528	1.11935	1.15089	0.836697	0.838911	1.12803	1.00837	1.05067	0.818707					528	1.0595	0.993919
528.2	0.911957	0.918986	0.924743	0.67787	0.67648	0.675485	0.806118	0.755828	0.84797	0.672123	0.643167	0.619475			528.2	0.515221	0.584787	0.597383	0.621103	0.496004	0.493618	0.513266	0.494162	0.429717	0.598594	0.579545	0.614141	0.419954	0.547964	0.479912	0.475046			528.2	1.12268	1.15449	0.839429	0.841493	1.13155	1.01155	1.05411	0.821351					528.2	1.06473	0.998598
528.4	0.921617	0.929013	0.934615	0.685475	0.684385	0.683126	0.815027	0.76355	0.856816	0.680021	0.650535	0.627028			528.4	0.52288	0.593441	0.605883	0.630072	0.503437	0.501134	0.520591	0.501509	0.436264	0.607431	0.587859	0.623455	0.426204	0.556082	0.486544	0.481745			528.4	1.12944	1.16183	0.845063	0.846897	1.13859	1.0175	1.06082	0.826624					528.4	1.07479	1.00806
528.6	0.926379	0.933652	0.939274	0.689107	0.688339	0.68704	0.819028	0.767495	0.861322	0.683844	0.654296	0.63073			528.6	0.526855	0.597865	0.61031	0.634678	0.50698	0.504972	0.524134	0.505391	0.439435	0.612006	0.592062	0.628043	0.429501	0.560232	0.490236	0.485236			528.6	1.13276	1.16544	0.847567	0.849804	1.14211	1.02075	1.06412	0.829305					528.6	1.07995	1.01286
528.8	0.936087	0.942928	0.948837	0.697078	0.696407	0.695018	0.827536	0.775802	0.870389	0.691119	0.661381	0.63792			528.8	0.534936	0.606844	0.618976	0.644072	0.514011	0.512265	0.531449	0.512786	0.445916	0.621201	0.600446	0.637214	0.435492	0.568632	0.497252	0.492201			528.8	1.13964	1.17276	0.852979	0.85524	1.14901	1.02665	1.07064	0.834451					528.8	1.08946	1.022
529	0.940586	0.947529	0.953715	0.700956	0.700233	0.698884	0.831618	0.780037	0.874865	0.695116	0.664929	0.641712			529	0.538938	0.611078	0.623355	0.648945	0.517706	0.51599	0.534956	0.51641	0.449296	0.625599	0.604673	0.641643	0.438612	0.57292	0.500769	0.495798			529	1.14327	1.17611	0.855746	0.857994	1.15263	1.02969	1.07394	0.836803					529	1.09382	1.02625
529.2	0.949821	0.957179	0.963906	0.708501	0.708298	0.706272	0.840009	0.787414	0.883101	0.702582	0.671986	0.648384			529.2	0.546889	0.619732	0.631892	0.658345	0.524835	0.523285	0.542591	0.523854	0.456046	0.634705	0.612869	0.65055	0.444446	0.581231	0.507748	0.502765			529.2	1.15037	1.18313	0.861026	0.863468	1.15979	1.03562	1.08059	0.841754					529.2	1.10419	1.03482
529.4	0.954459	0.961504	0.968232	0.712385	0.712241	0.709879	0.844209	0.791259	0.887112	0.705954	0.675167	0.651687			529.4	0.55066	0.624174	0.636068	0.663114	0.528439	0.52711	0.546475	0.527586	0.459175	0.639365	0.616998	0.655202	0.447592	0.585301	0.510935	0.50614			529.4	1.15362	1.18667	0.863586	0.866097	1.16327	1.03838	1.08364	0.844334					529.4	1.10903	1.03945
529.6	0.963448	0.970321	0.977014	0.719955	0.719966	0.71732	0.852433	0.798225	0.895383	0.713952	0.681944	0.658519			529.6	0.558795	0.632966	0.645013	0.672548	0.536109	0.534497	0.553955	0.535007	0.465739	0.647876	0.625115	0.664114	0.454191	0.593096	0.518042	0.51295			529.6	1.16026	1.19373	0.868967	0.871256	1.16991	1.04438	1.09026	0.849419					529.6	1.11904	1.04806
529.8	0.968174	0.974659	0.981542	0.723565	0.724005	0.720895	0.856353	0.801871	0.899511	0.717659	0.68536	0.662021			529.8	0.562847	0.637317	0.649594	0.677252	0.539747	0.538231	0.55776	0.53881	0.469027	0.652313	0.629457	0.668673	0.457503	0.597151	0.521303	0.516601			529.8	1.16334	1.19704	0.871555	0.873952	1.17326	1.0472	1.09356	0.851924					529.8	1.12372	1.05264
530	0.97706	0.98332	0.990903	0.731241	0.73178	0.728241	0.864461	0.809297	0.908003	0.725157	0.692217	0.668197			530	0.570765	0.646091	0.658387	0.686688	0.547385	0.545742	0.565397	0.546455	0.475671	0.661797	0.63764	0.677873	0.46399	0.605465	0.527879	0.523537			530	1.16979	1.20404	0.876712	0.878841	1.17999	1.05261	1.09967	0.856581					530	1.13354	1.06167
530.2	0.982935	0.989457	0.997005	0.73612	0.736981	0.733507	0.869861	0.814297	0.913492	0.730019	0.696559	0.67285			530.2	0.575834	0.652107	0.664288	0.693182	0.552107	0.55074	0.570331	0.551186	0.480087	0.667828	0.643123	0.684179	0.467998	0.610993	0.532328	0.528119			530.2	1.17412	1.20828	0.880012	0.882019	1.18426	1.05655	1.10375	0.859634					530.2	1.13973	1.0679
530.4	0.990275	0.996946	1.00451	0.742253	0.743637	0.739665	0.876372	0.820595	0.920221	0.735914	0.702189	0.678448			530.4	0.582293	0.659381	0.671534	0.701179	0.557836	0.557065	0.576589	0.557416	0.485412	0.675236	0.649921	0.692046	0.47319	0.617848	0.538189	0.533799			530.4	1.17945	1.21371	0.884013	0.885938	1.18931	1.06133	1.10916	0.863469					530.4	1.14699	1.07561
530.6	0.996162	1.00308	1.01072	0.746933	0.74846	0.744303	0.881573	0.825403	0.925407	0.74044	0.706575	0.683185			530.6	0.587557	0.665418	0.677161	0.707375	0.563053	0.562271	0.581665	0.562098	0.489817	0.681207	0.655281	0.697981	0.477194	0.623366	0.542896	0.53838			530.6	1.1837	1.21798	0.887269	0.889136	1.19361	1.06509	1.11307	0.866542					530.6	1.15332	1.08099
530.8	1.00358	1.01079	1.01804	0.752856	0.754791	0.750037	0.88811	0.831598	0.931784	0.746051	0.712171	0.689298			530.8	0.594038	0.672769	0.684434	0.715433	0.569517	0.568593	0.588035	0.568277	0.495344	0.688606	0.661754	0.705423	0.4823	0.630246	0.548613	0.544115			530.8	1.18901	1.22342	0.891314	0.89306	1.19903	1.06968	1.11792	0.870351					530.8	1.16089	1.08845
531	1.00951	1.01639	1.02386	0.75761	0.759853	0.754515	0.89329	0.836132	0.937399	0.750791	0.716327	0.693977			531	0.599286	0.678577	0.690312	0.721761	0.574461	0.573736	0.592946	0.573365	0.499581	0.69479	0.6674	0.711608	0.486233	0.63573	0.553145	0.548604			531	1.19279	1.2276	0.894349	0.896124	1.20342	1.0731	1.12184	0.873223					531	1.16702	1.09407
531.2	1.01674	1.02357	1.03124	0.763562	0.76621	0.760401	0.899793	0.842046	0.944512	0.756514	0.721561	0.6997			531.2	0.605958	0.685991	0.697453	0.729867	0.580721	0.58001	0.599166	0.579608	0.505004	0.702308	0.674547	0.719302	0.491226	0.642877	0.558785	0.554521			531.2	1.19768	1.23269	0.898356	0.90005	1.2087	1.07756	1.1268	0.876983					531.2	1.17478	1.10104
531.4	1.02237	1.02912	1.03721	0.768283	0.771143	0.76484	0.904739	0.846707	0.949913	0.761342	0.725832	0.703743			531.4	0.611044	0.692131	0.703285	0.73618	0.585589	0.584978	0.604096	0.584635	0.509234	0.7083	0.680106	0.725362	0.495558	0.648491	0.56332	0.559138			531.4	1.20156	1.23682	0.901618	0.903156	1.21286	1.08118	1.13073	0.879799					531.4	1.18064	1.10632
531.6	1.02953	1.03627	1.04494	0.77431	0.777178	0.770473	0.911273	0.85282	0.956455	0.767323	0.730882	0.709038			531.6	0.617827	0.69978	0.710282	0.744127	0.591665	0.59109	0.610128	0.590828	0.514566	0.716157	0.687135	0.733022	0.500802	0.655531	0.56891	0.564891			531.6	1.20645	1.24209	0.905604	0.906969	1.21784	1.08557	1.13548	0.883396					531.6	1.18811	1.11271
531.8	1.03794	1.04462	1.05341	0.781685	0.784238	0.777628	0.918793	0.860306	0.963691	0.773764	0.736928	0.715087			531.8	0.625828	0.708805	0.718732	0.753831	0.599007	0.598346	0.617493	0.5982	0.520928	0.725099	0.695382	0.742065	0.506911	0.663611	0.575877	0.571849			531.8	1.21251	1.24812	0.909882	0.911265	1.22362	1.09074	1.14134	0.887445					531.8	1.19665	1.12055
532	1.04179	1.04873	1.05759	0.785235	0.787924	0.780501	0.922516	0.863631	0.967222	0.777251	0.739873	0.718076			532	0.629755	0.713252	0.722731	0.758574	0.602834	0.601989	0.621361	0.601692	0.524018	0.729571	0.699729	0.74673	0.509733	0.667451	0.579056	0.57539			532	1.21539	1.25105	0.912123	0.913303	1.22636	1.09315	1.14414	0.889394					532	1.2008	1.12417
532.2	1.04973	1.0567	1.06572	0.791924	0.794264	0.78709	0.929548	0.869981	0.973913	0.78426	0.745701	0.724216			532.2	0.637543	0.722051	0.73138	0.767744	0.610656	0.609252	0.628686	0.609455	0.530418	0.738458	0.708196	0.755862	0.515824	0.675732	0.585627	0.582217			532.2	1.22089	1.25691	0.916612	0.917394	1.2322	1.09811	1.14962	0.893572					532.2	1.20915	1.13212
532.4	1.05408	1.06061	1.06972	0.795468	0.797437	0.790415	0.933129	0.873069	0.97794	0.787294	0.74858	0.726936			532.4	0.641528	0.726681	0.735657	0.772574	0.614427	0.613194	0.632395	0.613405	0.533608	0.743008	0.712131	0.760737	0.518616	0.67981	0.588877	0.585706			532.4	1.22348	1.25978	0.918833	0.919237	1.23489	1.10063	1.15215	0.895547					532.4	1.21355	1.13593
532.6	1.062	1.06851	1.07718	0.801666	0.804062	0.797211	0.93992	0.879672	0.984993	0.793651	0.754554	0.733159			532.6	0.649563	0.73586	0.744355	0.782149	0.621991	0.620516	0.639387	0.620454	0.539613	0.752285	0.720303	0.770002	0.524632	0.68759	0.595522	0.592556			532.6	1.22879	1.26497	0.922739	0.923046	1.24018	1.10543	1.15759	0.899494					532.6	1.222	1.14393
532.8	1.06582	1.07292	1.08154	0.804905	0.807556	0.800698	0.943459	0.883142	0.988903	0.796925	0.757691	0.736226			532.8	0.653425	0.740699	0.748699	0.7869	0.625529	0.623967	0.642768	0.624177	0.542757	0.756625	0.724189	0.774433	0.527516	0.691795	0.598987	0.595967			532.8	1.23147	1.26759	0.924814	0.924969	1.24281	1.10783	1.16015	0.90152					532.8	1.22635	1.14749
533	1.07386	1.08087	1.08996	0.811608	0.813866	0.807017	0.950532	0.890547	0.995649	0.803057	0.763613	0.742508			533	0.661004	0.749427	0.756775	0.796388	0.632643	0.631436	0.650164	0.631254	0.548998	0.765973	0.732386	0.783664	0.533019	0.699826	0.605496	0.602731			533	1.23641	1.27284	0.928672	0.92883	1.24776	1.11245	1.16526	0.90504					533	1.23455	1.15412
533.2	1.07741	1.08472	1.09367	0.814807	0.817204	0.810466	0.954119	0.893762	0.999004	0.806014	0.76665	0.745605			533.2	0.664701	0.753896	0.760648	0.80135	0.636241	0.635003	0.653694	0.63501	0.552145	0.770283	0.736423	0.788176	0.535807	0.703881	0.608769	0.606192			533.2	1.23896	1.2756	0.930658	0.930908	1.25014	1.1147	1.16783	0.906765					533.2	1.2385	1.15767
533.4	1.08505	1.09288	1.10132	0.820809	0.823723	0.816781	0.961031	0.900643	1.00589	0.811963	0.772596	0.75101			533.4	0.672373	0.762598	0.768974	0.810929	0.643378	0.642214	0.660839	0.642229	0.558348	0.779201	0.744493	0.797162	0.541525	0.712098	0.615543	0.612845			533.4	1.24408	1.28066	0.934385	0.93478	1.25529	1.11943	1.17299	0.910446					533.4	1.24659	1.16472
533.6	1.08864	1.09643	1.10459	0.824122	0.826589	0.820061	0.964112	0.903811	1.00912	0.81502	0.775481	0.753956			533.6	0.676574	0.766755	0.773431	0.815513	0.647022	0.645687	0.66443	0.6461	0.561398	0.783783	0.748715	0.801305	0.544479	0.716084	0.618721	0.616126			533.6	1.24662	1.28339	0.936405	0.936553	1.25774	1.12147	1.17557	0.912228					533.6	1.25036	1.16799
533.8	1.0957	1.10365	1.11214	0.830646	0.832819	0.826177	0.970618	0.909777	1.01544	0.821227	0.780962	0.758713			533.8	0.684392	0.775756	0.781895	0.824538	0.654377	0.652962	0.671233	0.653448	0.56745	0.792601	0.756906	0.810376	0.550221	0.724121	0.625478	0.622966			533.8	1.25131	1.28808	0.94018	0.940551	1.26302	1.12554	1.18027	0.915809					533.8	1.25805	1.17469
534	1.1004	1.1084	1.11683	0.834936	0.837009	0.830444	0.975041	0.913874	1.01989	0.825403	0.78484	0.762172			534	0.689483	0.781533	0.787436	0.830817	0.659102	0.657434	0.675854	0.658422	0.571419	0.798541	0.762333	0.816454	0.553983	0.729599	0.629734	0.627554			534	1.25426	1.29117	0.942613	0.943055	1.26607	1.12807	1.18344	0.918027					534	1.26239	1.17971
534.2	1.10616	1.11413	1.1228	0.840117	0.841899	0.835527	0.980513	0.918844	1.02541	0.830476	0.789019	0.76626			534.2	0.695907	0.788727	0.794201	0.838738	0.664731	0.663369	0.681792	0.664469	0.576584	0.806114	0.769312	0.823667	0.55876	0.736243	0.635209	0.633006			534.2	1.25791	1.29495	0.945433	0.945983	1.2698	1.1313	1.18727	0.920724					534.2	1.26837	1.18538
534.4	1.11073	1.11919	1.12754	0.84433	0.845856	0.839561	0.9847	0.922907	1.0295	0.834341	0.792827	0.769472			534.4	0.701184	0.794669	0.799657	0.844876	0.669273	0.667909	0.686241	0.669051	0.58082	0.811904	0.77435	0.829381	0.562989	0.741708	0.639704	0.637604			534.4	1.2611	1.29812	0.947848	0.94831	1.27269	1.13381	1.19037	0.922915					534.4	1.27305	1.19008
534.6	1.11637	1.12509	1.13299	0.849502	0.850754	0.844322	0.98987	0.927541	1.03422	0.839443	0.797506	0.773815			534.6	0.707611	0.801976	0.806487	0.852403	0.674949	0.673753	0.691835	0.674838	0.585936	0.819283	0.780661	0.836565	0.567933	0.748156	0.645245	0.643148			534.6	1.26482	1.30212	0.95052	0.951018	1.27647	1.137	1.19392	0.925616					534.6	1.27857	1.19584
534.8	1.12093	1.12959	1.13745	0.85326	0.854505	0.848521	0.993814	0.931347	1.03794	0.843046	0.800952	0.777506			534.8	0.71266	0.807308	0.81172	0.858549	0.679534	0.678215	0.696521	0.679713	0.590387	0.825113	0.785774	0.84206	0.571592	0.753136	0.649691	0.647503			534.8	1.26761	1.30484	0.95228	0.953187	1.27895	1.13928	1.19673	0.927689					534.8	1.28351	1.19975
535	1.12635	1.13506	1.14279	0.857811	0.859269	0.853631	0.998789	0.935919	1.04275	0.847443	0.805197	0.781734			535	0.71878	0.814016	0.81859	0.865908	0.685152	0.683916	0.702445	0.685697	0.595635	0.832306	0.792114	0.849211	0.576312	0.759225	0.655293	0.65269			535	1.27115	1.30807	0.954646	0.955792	1.28225	1.14221	1.2002	0.930111					535	1.28916	1.20513
535.2	1.13061	1.13925	1.14665	0.861614	0.86281	0.857194	1.00288	0.939291	1.04687	0.850941	0.808648	0.784933			535.2	0.723586	0.819604	0.823966	0.871945	0.689859	0.688478	0.706846	0.690398	0.599715	0.838114	0.797346	0.854965	0.580264	0.764373	0.65942	0.657169			535.2	1.27366	1.31068	0.956651	0.957936	1.28498	1.1445	1.20305	0.932176					535.2	1.29317	1.2089
535.4	1.13595	1.14479	1.15147	0.866168	0.867044	0.861954	1.00769	0.943627	1.05197	0.855294	0.813031	0.788857			535.4	0.729822	0.826525	0.830526	0.879314	0.695531	0.694019	0.712441	0.69627	0.604962	0.84496	0.803488	0.862026	0.585232	0.770799	0.6647	0.66268			535.4	1.27669	1.31388	0.959369	0.96039	1.28841	1.14724	1.20641	0.934506					535.4	1.29822	1.21373
535.6	1.14203	1.15126	1.15784	0.871446	0.872099	0.867099	1.01363	0.948707	1.05816	0.860595	0.817947	0.793443			535.6	0.736982	0.834912	0.838049	0.88834	0.702161	0.70111	0.718966	0.702776	0.610798	0.853203	0.811075	0.870421	0.590976	0.77856	0.671118	0.669106			535.6	1.28048	1.31789	0.962085	0.963396	1.29185	1.15064	1.21032	0.936884					535.6	1.30473	1.21902
535.8	1.14492	1.15453	1.16108	0.874188	0.87503	0.869844	1.0162	0.951149	1.06081	0.863128	0.820354	0.795851			535.8	0.740565	0.838881	0.842001	0.892553	0.705408	0.70417	0.72212	0.70597	0.613744	0.857428	0.815133	0.874474	0.594164	0.782061	0.674468	0.672423			535.8	1.28226	1.31988	0.963362	0.964963	1.29362	1.15213	1.21226	0.93835					535.8	1.3078	1.22183
536	1.15088	1.16011	1.16722	0.880046	0.880144	0.875112	1.02124	0.956092	1.06646	0.868356	0.824943	0.799769			536	0.747878	0.846965	0.849795	0.90133	0.712131	0.71077	0.728705	0.71302	0.619972	0.865425	0.822769	0.882998	0.599669	0.789796	0.680418	0.678807			536	1.28597	1.32381	0.965988	0.967783	1.29694	1.15512	1.21557	0.940739					536	1.31396	1.22761
536.2	1.15373	1.16275	1.17028	0.882317	0.882587	0.877412	1.02396	0.958174	1.0687	0.871314	0.827593	0.801962			536.2	0.751526	0.850574	0.853538	0.905533	0.715515	0.714129	0.731843	0.716303	0.622818	0.86977	0.82681	0.887091	0.602552	0.793532	0.683352	0.68208			536.2	1.28751	1.32545	0.967146	0.969074	1.29871	1.1566	1.21728	0.941807					536.2	1.31683	1.23024
536.4	1.15923	1.16934	1.17581	0.887445	0.887796	0.882351	1.02881	0.962006	1.07404	0.876246	0.832228	0.806521			536.4	0.75895	0.858776	0.861135	0.914538	0.721918	0.72059	0.737912	0.722781	0.628654	0.878057	0.834318	0.895923	0.608396	0.801229	0.689414	0.68869			536.4	1.29081	1.32862	0.969617	0.971762	1.30203	1.15917	1.22053	0.944231					536.4	1.3224	1.23606
536.6	1.16213	1.17237	1.17867	0.889847	0.889954	0.884502	1.03162	0.964156	1.07642	0.878653	0.834368	0.80843			536.6	0.762632	0.862821	0.864998	0.918664	0.724991	0.723761	0.74104	0.72591	0.631649	0.882479	0.837838	0.900283	0.611094	0.80483	0.692404	0.691911			536.6	1.29228	1.33029	0.971016	0.972807	1.30375	1.1605	1.22194	0.945381					536.6	1.32562	1.23881
536.8	1.16782	1.17786	1.18435	0.894658	0.894081	0.888971	1.0364	0.968117	1.08149	0.88357	0.838978	0.813552			536.8	0.769546	0.870952	0.872577	0.927268	0.731508	0.730368	0.747398	0.732003	0.63703	0.890458	0.845648	0.90868	0.616758	0.81198	0.698395	0.698089			536.8	1.29525	1.33368	0.973344	0.974971	1.30661	1.16247	1.22496	0.947583					536.8	1.33088	1.24373
537	1.17058	1.18074	1.18736	0.896787	0.896664	0.891029	1.03918	0.970292	1.08394	0.88583	0.841265	0.815911			537	0.772805	0.874738	0.876025	0.931276	0.734701	0.733562	0.750528	0.735171	0.639877	0.894536	0.849199	0.912706	0.619651	0.815817	0.701255	0.70123			537	1.29645	1.33513	0.974494	0.976225	1.30804	1.16368	1.22632	0.948785					537	1.33373	1.24598
537.2	1.17598	1.18643	1.19288	0.901304	0.901133	0.895146	1.04418	0.974351	1.08894	0.890617	0.845807	0.820702			537.2	0.779645	0.88238	0.883143	0.939645	0.740996	0.739911	0.756705	0.741267	0.645946	0.902672	0.856423	0.920838	0.624953	0.822776	0.706858	0.707296			537.2	1.29921	1.33813	0.976701	0.978698	1.31069	1.16603	1.22893	0.950939					537.2	1.33907	1.2511
537.4	1.17934	1.19025	1.19625	0.904383	0.90401	0.898324	1.04703	0.976974	1.09204	0.893377	0.848667	0.823143			537.4	0.784211	0.887336	0.888039	0.945207	0.744949	0.74447	0.760711	0.745386	0.650077	0.907811	0.861064	0.925946	0.628759	0.827502	0.71073	0.711129			537.4	1.30121	1.33993	0.978257	0.980174	1.31248	1.1677	1.23054	0.952245					537.4	1.34262	1.25415
537.6	1.18389	1.19496	1.20063	0.908421	0.907603	0.90212	1.05073	0.980325	1.09602	0.897065	0.852348	0.82638			537.6	0.789956	0.893724	0.894184	0.951979	0.750144	0.749776	0.76556	0.750446	0.654666	0.914101	0.866748	0.932572	0.633334	0.833441	0.715468	0.715984			537.6	1.30369	1.34216	0.980119	0.981805	1.31444	1.16968	1.23256	0.953897					537.6	1.34676	1.25766
537.8	1.18731	1.19858	1.20384	0.910971	0.910283	0.904813	1.05353	0.982849	1.09895	0.899882	0.854905	0.829107			537.8	0.794356	0.898916	0.899076	0.957398	0.754484	0.753997	0.769773	0.754588	0.658207	0.91909	0.871404	0.938071	0.636452	0.837753	0.71905	0.719987			537.8	1.3053	1.34378	0.981443	0.983002	1.3159	1.17118	1.23367	0.955127					537.8	1.34986	1.26047
538	1.19165	1.20301	1.20803	0.914202	0.913743	0.908206	1.05693	0.986022	1.10287	0.903303	0.858293	0.83221			538	0.799795	0.90533	0.905344	0.964089	0.759812	0.759118	0.774914	0.759625	0.662747	0.925264	0.877044	0.94487	0.640745	0.843089	0.723582	0.72491			538	1.30727	1.34565	0.983101	0.984566	1.31757	1.1726	1.23515	0.956659					538	1.354	1.2639
538.2	1.19493	1.20635	1.21122	0.917036	0.916367	0.910777	1.05986	0.988757	1.10599	0.906335	0.860742	0.834598			538.2	0.804408	0.91042	0.910159	0.969334	0.763916	0.76347	0.778815	0.763575	0.666196	0.930253	0.881541	0.950134	0.644276	0.847854	0.727295	0.728717			538.2	1.30854	1.34724	0.984184	0.985732	1.31914	1.17372	1.23625	0.957832					538.2	1.35722	1.26676
538.4	1.19886	1.21074	1.21536	0.920317	0.919394	0.913888	1.06317	0.992247	1.10951	0.909882	0.863933	0.837786			538.4	0.810052	0.916779	0.916167	0.975909	0.769388	0.76871	0.783643	0.768719	0.670932	0.936267	0.88716	0.956716	0.648452	0.854013	0.731706	0.73374			538.4	1.31018	1.34919	0.985608	0.987057	1.32093	1.1751	1.23775	0.959368					538.4	1.36103	1.27025
538.6	1.20184	1.21372	1.21891	0.922602	0.922078	0.916487	1.06534	0.994543	1.11227	0.912525	0.866912	0.840271			538.6	0.814577	0.921768	0.920894	0.981348	0.773144	0.77272	0.787466	0.772727	0.674463	0.941202	0.891448	0.961621	0.6516	0.858585	0.735497	0.737503			538.6	1.31169	1.35058	0.986792	0.98819	1.32216	1.17607	1.23856	0.960296					538.6	1.36392	1.27336
538.8	1.2057	1.21725	1.2234	0.925641	0.925558	0.919611	1.0685	0.997517	1.11581	0.915755	0.870277	0.843463			538.8	0.819856	0.928028	0.927041	0.987964	0.777988	0.777897	0.792114	0.77775	0.678675	0.947792	0.897065	0.967818	0.655681	0.864328	0.740174	0.741949			538.8	1.31343	1.35228	0.988001	0.989484	1.32371	1.17736	1.23976	0.961444					538.8	1.36748	1.2773
539	1.21043	1.22229	1.22726	0.929208	0.929868	0.923111	1.07208	1.00095	1.1199	0.919277	0.874094	0.846849			539	0.826153	0.935184	0.934375	0.995991	0.783794	0.783612	0.798019	0.783732	0.684038	0.955074	0.903624	0.97553	0.660428	0.870613	0.745175	0.747738			539	1.31552	1.35372	0.989408	0.990754	1.32538	1.17866	1.24068	0.962864					539	1.3719	1.28103
539.2	1.21248	1.22446	1.22903	0.930995	0.931757	0.925144	1.07425	1.00254	1.12217	0.921335	0.875964	0.848708			539.2	0.829218	0.938703	0.937639	0.99978	0.786811	0.786578	0.801024	0.786638	0.686644	0.95866	0.906858	0.979147	0.662292	0.873901	0.747573	0.750369			539.2	1.31658	1.35444	0.99014	0.991366	1.32611	1.17924	1.24125	0.963424					539.2	1.37388	1.28283
539.4	1.21664	1.22842	1.23324	0.934201	0.935002	0.928534	1.07794	1.0064	1.12566	0.92527	0.879767	0.852676			539.4	0.835428	0.945838	0.944588	1.00738	0.792803	0.792509	0.806483	0.792474	0.691758	0.965763	0.913124	0.986304	0.667473	0.880176	0.752704	0.755803			539.4	1.31825	1.35609	0.991778	0.992769	1.3274	1.18037	1.24236	0.964668					539.4	1.37717	1.28607
539.6	1.21869	1.23042	1.23516	0.936194	0.936699	0.9304	1.07975	1.00803	1.12753	0.926971	0.881376	0.854447			539.6	0.838613	0.949545	0.947892	1.01146	0.795688	0.795366	0.809489	0.795382	0.694334	0.969089	0.916124	0.990011	0.669941	0.883234	0.755278	0.758441			539.6	1.31905	1.35692	0.992506	0.993461	1.32777	1.18091	1.24287	0.965341					539.6	1.37917	1.2884
539.8	1.22272	1.23399	1.23892	0.939711	0.940045	0.93406	1.08356	1.01206	1.13102	0.930418	0.884839	0.857041			539.8	0.844713	0.956645	0.954798	1.01901	0.801577	0.801214	0.815019	0.801444	0.699282	0.975854	0.922526	0.997022	0.674547	0.889109	0.760234	0.763721			539.8	1.32053	1.35842	0.993775	0.994475	1.32908	1.18215	1.24345	0.966386					539.8	1.38327	1.29139
540	1.22493	1.23591	1.24094	0.941516	0.941873	0.935781	1.08495	1.01371	1.13335	0.932117	0.886755	0.858897			540	0.847803	0.960005	0.958289	1.02247	0.804502	0.804043	0.817867	0.804303	0.701735	0.979263	0.925983	1.0005	0.676737	0.892159	0.76297	0.76634			540	1.32129	1.359	0.99418	0.994927	1.32981	1.18271	1.24374	0.967018					540	1.38497	1.29286
540.2	1.22816	1.23999	1.24461	0.944906	0.945577	0.93921	1.0885	1.01666	1.13656	0.935567	0.890008	0.861399			540.2	0.85383	0.967088	0.964771	1.02977	0.810407	0.809437	0.823162	0.810251	0.706625	0.985932	0.931842	1.00779	0.681192	0.898452	0.767669	0.77175			540.2	1.32254	1.36001	0.995189	0.996242	1.33081	1.18404	1.2443	0.968111					540.2	1.38876	1.29627
540.4	1.23059	1.24205	1.24681	0.947094	0.947541	0.941647	1.09029	1.01863	1.13889	0.937862	0.892162	0.862895			540.4	0.857908	0.971873	0.969177	1.03482	0.81427	0.81311	0.826674	0.814092	0.709655	0.990045	0.935845	1.01233	0.684483	0.902533	0.770958	0.775062			540.4	1.32342	1.36098	0.99591	0.996642	1.33119	1.18461	1.24472	0.968657					540.4	1.39148	1.29828
540.6	1.2335	1.24445	1.24943	0.949766	0.950117	0.944173	1.09251	1.02128	1.1416	0.940563	0.894522	0.864997			540.6	0.863008	0.977804	0.974529	1.04118	0.818936	0.817396	0.831326	0.818913	0.713423	0.995611	0.940923	1.01811	0.688556	0.907415	0.775072	0.779468			540.6	1.32434	1.362	0.99686	0.996984	1.33155	1.1853	1.24505	0.969351					540.6	1.39433	1.30052
540.8	1.23587	1.24638	1.25169	0.951818	0.952092	0.94592	1.0947	1.02326	1.1439	0.942803	0.896521	0.867193			540.8	0.867089	0.982409	0.978724	1.04582	0.822701	0.820842	0.834833	0.822763	0.716441	1.00011	0.944918	1.02273	0.691583	0.911299	0.778216	0.782886			540.8	1.32498	1.36275	0.997112	0.99735	1.33187	1.18577	1.24537	0.969875					540.8	1.39643	1.3019
541	1.23833	1.24905	1.25459	0.954249	0.954524	0.948438	1.097	1.02555	1.1465	0.945257	0.898976	0.869602			541	0.872013	0.987822	0.98398	1.05191	0.827414	0.825116	0.839135	0.827392	0.720378	1.00576	0.949945	1.02859	0.695093	0.916081	0.782124	0.787408			541	1.32558	1.36348	0.997434	0.998052	1.33266	1.18633	1.24552	0.970446					541	1.39915	1.30371
541.2	1.24019	1.25062	1.25681	0.956284	0.956465	0.950679	1.09889	1.02772	1.14836	0.947217	0.901259	0.871679			541.2	0.875828	0.992067	0.988168	1.05661	0.83097	0.828452	0.842688	0.831139	0.723462	1.01036	0.953984	1.03283	0.698145	0.920015	0.785334	0.790742			541.2	1.32621	1.36409	0.997828	0.998572	1.33296	1.18684	1.24573	0.970861					541.2	1.40109	1.30526
541.4	1.24237	1.25306	1.25962	0.958847	0.958529	0.953597	1.10155	1.03018	1.15063	0.949568	0.903574	0.874157			541.4	0.880759	0.997325	0.993159	1.06265	0.835527	0.832816	0.847106	0.835822	0.727305	1.01603	0.95916	1.03816	0.701824	0.924935	0.78921	0.794821			541.4	1.32665	1.36479	0.998397	0.99904	1.33315	1.18738	1.24599	0.971189					541.4	1.40348	1.30719
541.6	1.24469	1.25509	1.26132	0.960485	0.960236	0.955479	1.10347	1.03152	1.15249	0.951243	0.905567	0.876152			541.6	0.884638	1.00183	0.9971	1.06734	0.838952	0.836219	0.850475	0.839274	0.730207	1.02044	0.962884	1.04292	0.704696	0.928572	0.792125	0.798157			541.6	1.32717	1.36522	0.999071	0.999204	1.33315	1.18743	1.24607	0.971492					541.6	1.40512	1.30898
541.8	1.24747	1.25739	1.26338	0.96297	0.96273	0.957808	1.10577	1.03308	1.15487	0.953436	0.907741	0.878254			541.8	0.88955	1.00722	1.0019	1.07327	0.842813	0.840488	0.854442	0.843401	0.733549	1.02583	0.967593	1.04829	0.708266	0.933098	0.795803	0.802573			541.8	1.32778	1.36558	0.999582	0.999465	1.33336	1.18741	1.24601	0.971632					541.8	1.40735	1.31111
542	1.25021	1.26047	1.26593	0.965865	0.965123	0.960793	1.10859	1.03567	1.1574	0.956029	0.909942	0.880369			542	0.895528	1.01334	1.00803	1.0799	0.848225	0.845823	0.859655	0.848465	0.738038	1.03218	0.973235	1.05493	0.712847	0.938563	0.800147	0.807478			542	1.32781	1.36599	0.99968	0.999455	1.33353	1.18776	1.24577	0.971856					542	1.41054	1.31339
542.2	1.25132	1.26204	1.26734	0.967366	0.966349	0.962337	1.10974	1.03682	1.15838	0.957068	0.911161	0.881334			542.2	0.898292	1.01648	1.01087	1.08346	0.850891	0.84816	0.862123	0.850797	0.740341	1.03522	0.975886	1.05806	0.714859	0.941122	0.802159	0.809941			542.2	1.32815	1.36605	0.999726	0.999647	1.33359	1.18774	1.24559	0.972168					542.2	1.41208	1.3147
542.4	1.25369	1.26388	1.27026	0.970336	0.968555	0.965089	1.11177	1.03935	1.16067	0.959992	0.913613	0.883908			542.4	0.904391	1.02271	1.01677	1.09028	0.855671	0.852655	0.86707	0.856034	0.744598	1.04164	0.981263	1.06422	0.719032	0.946488	0.806619	0.814704			542.4	1.32808	1.36653	1	1	1.33364	1.18772	1.24573	0.972522					542.4	1.41406	1.31674
542.6	1.25465	1.26529	1.27148	0.971581	0.969681	0.966344	1.11289	1.04088	1.16125	0.961245	0.914719	0.884998			542.6	0.907356	1.02597	1.01985	1.09385	0.857772	0.855329	0.869416	0.858349	0.746783	1.04466	0.983803	1.06743	0.721499	0.94914	0.808581	0.816945			542.6	1.32811	1.36675	0.999911	0.999984	1.33353	1.1878	1.24555	0.972781					542.6	1.41508	1.31787
542.8	1.25702	1.26789	1.27411	0.973993	0.97258	0.968707	1.11513	1.04249	1.164	0.963279	0.917222	0.886605			542.8	0.913218	1.03209	1.02556	1.10013	0.862504	0.859803	0.874217	0.863434	0.750807	1.0506	0.989251	1.07347	0.72533	0.954524	0.812974	0.821454			542.8	1.32793	1.36675	0.999746	0.999652	1.33347	1.18765	1.24521	0.973084					542.8	1.41742	1.31989
543	1.25832	1.26911	1.27539	0.974725	0.973718	0.970077	1.11592	1.0432	1.16517	0.964347	0.918049	0.887931			543	0.916061	1.03502	1.02823	1.10306	0.864943	0.862329	0.876493	0.865773	0.753075	1.05346	0.991867	1.07659	0.727217	0.957082	0.814981	0.823907			543	1.32807	1.36682	0.999829	0.99955	1.33338	1.18745	1.24475	0.973076					543	1.41856	1.32038
543.2	1.26065	1.27097	1.27803	0.976538	0.97563	0.972115	1.11747	1.04462	1.16757	0.966146	0.919915	0.890152			543.2	0.921512	1.04112	1.03343	1.10922	0.86942	0.866867	0.881249	0.87029	0.757189	1.05962	0.996995	1.08188	0.73121	0.962655	0.819459	0.828667			543.2	1.32841	1.36672	0.999721	0.999445	1.33299	1.18733	1.2438	0.972968					543.2	1.42024	1.3221
543.4	1.26201	1.27234	1.27936	0.977915	0.976812	0.973733	1.11863	1.04571	1.16921	0.967567	0.920744	0.891486			543.4	0.925387	1.04527	1.03707	1.11361	0.872403	0.870019	0.884296	0.873472	0.759855	1.0636	1.00021	1.08559	0.73357	0.965849	0.822058	0.831495			543.4	1.32823	1.36636	0.999637	0.999272	1.33263	1.1871	1.24327	0.972691					543.4	1.42151	1.32318
543.6	1.26358	1.2738	1.28096	0.979511	0.978508	0.97587	1.11997	1.04709	1.17133	0.969035	0.922085	0.893167			543.6	0.929998	1.05039	1.0418	1.11872	0.876139	0.873919	0.888075	0.877428	0.763423	1.06835	1.00442	1.09034	0.736775	0.969835	0.8257	0.835041			543.6	1.32832	1.36603	0.999604	0.998809	1.33246	1.18678	1.24252	0.972275					543.6	1.42295	1.32463
543.8	1.26486	1.27536	1.28237	0.980806	0.979838	0.977029	1.12101	1.04801	1.17218	0.969883	0.923144	0.894558			543.8	0.933418	1.0543	1.0453	1.12298	0.878973	0.876919	0.891048	0.880108	0.766177	1.07245	1.00762	1.09411	0.739182	0.973072	0.828259	0.837908			543.8	1.32813	1.36569	0.999295	0.998602	1.33202	1.18624	1.24212	0.971963					543.8	1.42362	1.32549
544	1.26622	1.27734	1.28419	0.982581	0.981456	0.978854	1.12265	1.04883	1.17307	0.971026	0.924463	0.896317			544	0.937437	1.05901	1.04975	1.1283	0.882623	0.880571	0.894607	0.883719	0.769577	1.07719	1.01164	1.09884	0.742228	0.97713	0.831487	0.841469			544	1.32771	1.36526	0.99893	0.998323	1.33142	1.18556	1.2415	0.971579					544	1.42447	1.32685
544.2	1.26758	1.27857	1.28541	0.983731	0.982588	0.980136	1.12376	1.04966	1.17404	0.971742	0.925193	0.897304			544.2	0.94058	1.06316	1.05307	1.13226	0.885733	0.883448	0.897449	0.886608	0.77205	1.08081	1.01472	1.10268	0.744277	0.980226	0.834108	0.844638			544.2	1.32713	1.36485	0.998697	0.998076	1.33094	1.18473	1.24067	0.971332					544.2	1.42561	1.32813
544.4	1.26885	1.2799	1.28686	0.985093	0.984208	0.981662	1.1249	1.05081	1.17513	0.972845	0.926321	0.899096			544.4	0.944588	1.06844	1.05736	1.13696	0.889356	0.887206	0.901176	0.889987	0.775291	1.08541	1.01867	1.10719	0.747278	0.984285	0.837332	0.848217			544.4	1.32669	1.3644	0.998545	0.99762	1.33031	1.18377	1.23965	0.971017					544.4	1.42711	1.32951
544.6	1.27016	1.28118	1.28793	0.986138	0.985372	0.982979	1.12552	1.05131	1.17605	0.97373	0.92697	0.90022			544.6	0.947765	1.07219	1.0605	1.14091	0.892157	0.889967	0.903745	0.892827	0.777867	1.08877	1.02173	1.11092	0.749655	0.987274	0.839637	0.850841			544.6	1.326	1.36362	0.998047	0.997038	1.32988	1.18294	1.2389	0.97064					544.6	1.42781	1.33024
544.8	1.27168	1.28238	1.28956	0.987459	0.986922	0.984381	1.12616	1.0521	1.17732	0.974829	0.927998	0.901777			544.8	0.95171	1.07709	1.06475	1.14574	0.895729	0.893225	0.907123	0.896392	0.780981	1.0929	1.02552	1.11535	0.752438	0.991295	0.842494	0.854361			544.8	1.32549	1.36278	0.997181	0.996419	1.32928	1.18196	1.23784	0.970249					544.8	1.42912	1.33133
545	1.27187	1.28345	1.29099	0.989292	0.988375	0.986135	1.12728	1.05296	1.1787	0.976155	0.929453	0.903128			545	0.956163	1.08248	1.06952	1.15119	0.900132	0.897413	0.91114	0.900626	0.784418	1.0979	1.03016	1.12017	0.755458	0.99578	0.846116	0.858184			545	1.32471	1.36164	0.996393	0.995571	1.32869	1.18129	1.2364	0.969557					545	1.42961	1.3323
545.2	1.27262	1.28415	1.29157	0.98972	0.988717	0.987001	1.12771	1.0535	1.17907	0.977101	0.930131	0.904215			545.2	0.958369	1.08525	1.07197	1.15409	0.902135	0.899137	0.913346	0.902462	0.786127	1.10021	1.03244	1.12286	0.757229	0.997933	0.847888	0.859809			545.2	1.32425	1.36121	0.995919	0.995228	1.32804	1.18082	1.23573	0.969247					545.2	1.43004	1.33205
545.4	1.2738	1.28493	1.29277	0.990836	0.990013	0.988021	1.12877	1.0542	1.17989	0.978547	0.930491	0.907028			545.4	0.962479	1.09079	1.07655	1.16012	0.906324	0.902718	0.917031	0.906335	0.789613	1.10486	1.03691	1.12767	0.75996	1.00228	0.851144	0.863587			545.4	1.32364	1.36028	0.995389	0.994552	1.32655	1.17915	1.23412	0.968506					545.4	1.42988	1.33218
545.6	1.27436	1.28511	1.29296	0.991313	0.990367	0.98896	1.12937	1.05455	1.18037	0.979279	0.930785	0.908135			545.6	0.964874	1.09357	1.07909	1.16254	0.908289	0.904545	0.918825	0.908566	0.791255	1.1073	1.0391	1.13022	0.761522	1.00475	0.853007	0.865418			545.6	1.32315	1.35976	0.99517	0.99411	1.32589	1.17844	1.23347	0.967867					545.6	1.43027	1.33208
545.8	1.27556	1.28638	1.29433	0.992193	0.991586	0.990561	1.12987	1.05492	1.18113	0.979666	0.931604	0.909871			545.8	0.968945	1.09899	1.08375	1.16779	0.912777	0.908566	0.922593	0.912159	0.794726	1.11211	1.04328	1.13543	0.764957	1.00912	0.856548	0.868771			545.8	1.32176	1.3588	0.994398	0.993018	1.32445	1.17704	1.23176	0.966647					545.8	1.43133	1.33321
546	1.27646	1.28702	1.29531	0.992713	0.992096	0.991308	1.13013	1.05509	1.18171	0.980023	0.93178	0.911079			546	0.971758	1.10247	1.08685	1.17134	0.915528	0.910969	0.924963	0.914586	0.796891	1.11524	1.04577	1.13844	0.766896	1.01207	0.858762	0.871183			546	1.32088	1.35755	0.993775	0.992344	1.32336	1.17608	1.23068	0.965854					546	1.43174	1.33374
546.2	1.27766	1.28784	1.2961	0.993781	0.992788	0.992434	1.13098	1.05533	1.18233	0.980932	0.93208	0.912851			546.2	0.975356	1.10703	1.09062	1.17569	0.918782	0.914131	0.927993	0.917499	0.799446	1.11898	1.04938	1.14249	0.769213	1.01542	0.861399	0.874532			546.2	1.31988	1.35626	0.993212	0.991445	1.3223	1.17479	1.22919	0.964779					546.2	1.43233	1.33443
546.4	1.27785	1.28843	1.29645	0.994513	0.993607	0.992974	1.13143	1.05615	1.18277	0.981523	0.932467	0.913521			546.4	0.978073	1.11062	1.0939	1.17928	0.921298	0.916701	0.930209	0.919931	0.801289	1.12184	1.05205	1.14569	0.771187	1.01794	0.863545	0.876869			546.4	1.31877	1.35522	0.992593	0.990816	1.32156	1.1736	1.22818	0.963983					546.4	1.43211	1.33492
546.6	1.27834	1.28897	1.29703	0.99534	0.994417	0.993807	1.13209	1.05697	1.18299	0.982448	0.933205	0.914846			546.6	0.981778	1.11486	1.09789	1.18356	0.924427	0.919517	0.933014	0.923078	0.804106	1.12533	1.05537	1.14982	0.773631	1.0209	0.865985	0.879676			546.6	1.3175	1.35388	0.991516	0.990002	1.32003	1.17204	1.227	0.963188					546.6	1.43142	1.33567
546.8	1.27919	1.28927	1.29779	0.995986	0.99506	0.994293	1.13241	1.05774	1.18291	0.982974	0.933382	0.915834			546.8	0.984165	1.11798	1.10063	1.1869	0.926841	0.921859	0.935129	0.925373	0.806307	1.12809	1.05805	1.15304	0.775787	1.02369	0.868022	0.882127			546.8	1.3164	1.35301	0.990688	0.989011	1.31872	1.17085	1.22577	0.962485					546.8	1.43161	1.33589
547	1.2801	1.28928	1.29866	0.996656	0.99584	0.994555	1.13292	1.05834	1.18266	0.983557	0.933697	0.916865			547	0.987442	1.12186	1.10406	1.19084	0.929758	0.924903	0.93773	0.928188	0.809004	1.13136	1.06111	1.1565	0.778028	1.02713	0.8702	0.884948			547	1.31478	1.35193	0.989551	0.987785	1.31692	1.16921	1.22408	0.961628					547	1.43178	1.33602
547.2	1.28038	1.2895	1.29884	0.997044	0.996476	0.995309	1.13333	1.05854	1.18321	0.984333	0.934026	0.917596			547.2	0.990097	1.12483	1.10674	1.19377	0.932009	0.927022	0.939892	0.930793	0.810744	1.13378	1.06354	1.15941	0.779485	1.02952	0.872212	0.887225			547.2	1.3136	1.35061	0.988746	0.986821	1.3158	1.16794	1.22258	0.960912					547.2	1.43178	1.33595
547.4	1.28085	1.28977	1.29927	0.997577	0.996863	0.995844	1.13355	1.05926	1.18373	0.985098	0.934	0.918162			547.4	0.993313	1.12848	1.11016	1.19748	0.934756	0.929833	0.942237	0.933672	0.812985	1.13706	1.06651	1.16285	0.781394	1.03256	0.874722	0.889607			547.4	1.31214	1.34889	0.987573	0.985762	1.31422	1.16634	1.22097	0.95976					547.4	1.43208	1.33551
547.6	1.28104	1.28997	1.29969	0.998194	0.997043	0.996718	1.13349	1.05901	1.18407	0.985866	0.934244	0.918702			547.6	0.997084	1.13276	1.11463	1.20233	0.937791	0.93277	0.944974	0.936583	0.815743	1.14084	1.06995	1.16689	0.784051	1.03625	0.877557	0.892015			547.6	1.31051	1.347	0.986171	0.983984	1.31211	1.1645	1.21878	0.957843					547.6	1.43187	1.33472
547.8	1.28162	1.29018	1.29969	0.998548	0.996931	0.997153	1.13371	1.05899	1.18443	0.986033	0.934499	0.918466			547.8	0.999043	1.13493	1.11668	1.20455	0.939153	0.93439	0.946328	0.938248	0.817153	1.14241	1.07182	1.16884	0.785028	1.03796	0.87896	0.893415			547.8	1.3094	1.34587	0.985329	0.983201	1.31086	1.16354	1.21761	0.957084					547.8	1.43145	1.33474
548	1.28151	1.28998	1.29981	0.998924	0.99731	0.997285	1.13411	1.05949	1.1847	0.986346	0.93455	0.918644			548	1.00267	1.13954	1.12062	1.20916	0.941904	0.937748	0.949422	0.940947	0.81982	1.1463	1.07564	1.1727	0.787528	1.04168	0.882037	0.896192			548	1.30749	1.34397	0.984046	0.981803	1.30846	1.1614	1.21495	0.955595					548	1.43212	1.33508
548.2	1.28168	1.29	1.29913	0.999152	0.997473	0.997349	1.13412	1.05953	1.18481	0.986683	0.934289	0.918597			548.2	1.00426	1.14146	1.12222	1.21133	0.943052	0.939429	0.950816	0.942425	0.821119	1.14818	1.07732	1.17456	0.788851	1.04312	0.883366	0.897374			548.2	1.30645	1.34283	0.983305	0.980941	1.30734	1.16036	1.21382	0.954578					548.2	1.43183	1.33461
548.4	1.28205	1.2903	1.29927	0.999716	0.998175	0.997337	1.13404	1.05998	1.1849	0.986744	0.933733	0.918513			548.4	1.00803	1.14549	1.1261	1.21608	0.945826	0.94225	0.953606	0.944915	0.824332	1.15202	1.08035	1.17837	0.791476	1.04641	0.885703	0.900306			548.4	1.30443	1.34082	0.981596	0.979476	1.30452	1.15813	1.21149	0.952696					548.4	1.43178	1.33398
548.6	1.28206	1.29027	1.2991	1	0.998437	0.99772	1.13378	1.06003	1.18504	0.986563	0.933568	0.918176			548.6	1.01017	1.14817	1.12852	1.21866	0.947834	0.944442	0.955207	0.947054	0.82633	1.15431	1.08265	1.18087	0.793054	1.04859	0.887314	0.902209			548.6	1.3031	1.33925	0.980528	0.978247	1.30303	1.15659	1.20983	0.95156					548.6	1.43164	1.33418
548.8	1.28201	1.29025	1.29887	0.999942	0.998746	0.998158	1.13336	1.05995	1.18548	0.986574	0.93379	0.917549			548.8	1.01331	1.1514	1.13143	1.22158	0.950273	0.946792	0.957337	0.949681	0.828713	1.15729	1.08505	1.18372	0.794946	1.05109	0.88918	0.90441			548.8	1.30112	1.33709	0.979361	0.97653	1.30103	1.15472	1.20797	0.949887					548.8	1.43192	1.33349
549	1.28192	1.28993	1.29895	0.999909	0.999014	0.997857	1.13318	1.06014	1.18498	0.98659	0.933947	0.917114			549	1.01535	1.15372	1.13346	1.22441	0.951702	0.948656	0.958931	0.951229	0.83028	1.15961	1.08709	1.18576	0.796284	1.05302	0.890752	0.906088			549	1.29959	1.33537	0.977845	0.97526	1.29931	1.15304	1.20593	0.948705					549	1.43148	1.33255
549.2	1.2817	1.28993	1.29837	0.999836	0.999147	0.997715	1.13319	1.06022	1.18449	0.986496	0.934019	0.91596			549.2	1.01799	1.15686	1.13619	1.22767	0.953708	0.950757	0.960715	0.953527	0.832066	1.16232	1.08951	1.1884	0.797861	1.05516	0.89253	0.908226			549.2	1.29759	1.3329	0.976039	0.973623	1.29699	1.15091	1.20354	0.947243					549.2	1.43065	1.33153
549.4	1.2815	1.28957	1.29756	0.999903	0.999624	0.997888	1.13293	1.06017	1.18453	0.986559	0.934083	0.915232			549.4	1.01973	1.15932	1.13806	1.2304	0.95512	0.952494	0.962493	0.955063	0.833637	1.1647	1.09177	1.19071	0.799081	1.05709	0.893854	0.909654			549.4	1.29588	1.33123	0.974749	0.972303	1.29531	1.14932	1.20168	0.945982					549.4	1.42992	1.33043
549.6	1.28106	1.28917	1.29736	0.999917	0.999982	0.997872	1.13273	1.06004	1.18439	0.986324	0.933966	0.914525			549.6	1.02205	1.16185	1.1405	1.23379	0.957217	0.954816	0.964562	0.957111	0.835693	1.16761	1.09418	1.19342	0.800832	1.05954	0.895637	0.911389			549.6	1.29392	1.32899	0.973196	0.970685	1.29309	1.14716	1.19918	0.944352					549.6	1.4295	1.32928
549.8	1.28089	1.2888	1.29713	0.999995	1	0.99814	1.13262	1.05964	1.18374	0.986034	0.93402	0.914001			549.8	1.02427	1.16398	1.14236	1.23611	0.959075	0.956303	0.966025	0.958649	0.837391	1.16972	1.0958	1.1954	0.802042	1.06165	0.896853	0.912791			549.8	1.29216	1.32714	0.971937	0.969303	1.29105	1.14515	1.197	0.942889					549.8	1.42928	1.32864
550	1.28037	1.28843	1.29696	0.999857	0.999823	0.9983	1.1323	1.05905	1.18339	0.985971	0.933628	0.912917			550	1.02693	1.16642	1.14476	1.23916	0.961226	0.958348	0.967743	0.96069	0.839038	1.17228	1.09804	1.19796	0.803346	1.06404	0.898529	0.914482			550	1.28975	1.32472	0.970617	0.967481	1.28852	1.14268	1.19426	0.941007					550	1.42959	1.32724
550.2	1.27937	1.28759	1.29629	0.999607	0.999244	0.998908	1.1318	1.05852	1.183	0.985614	0.933516	0.911499			550.2	1.02995	1.16983	1.14778	1.24279	0.963629	0.960191	0.969835	0.963431	0.841113	1.17515	1.10039	1.20064	0.805013	1.06654	0.900486	0.916481			550.2	1.28733	1.32167	0.968371	0.965531	1.28541	1.13971	1.19106	0.938881					550.2	1.42753	1.32667
550.4	1.27927	1.28783	1.29552	0.999797	0.999195	0.999615	1.13149	1.0584	1.18308	0.985293	0.933103	0.910909			550.4	1.0312	1.1713	1.14913	1.24472	0.964325	0.960845	0.970904	0.964374	0.841922	1.17676	1.10153	1.20234	0.806133	1.06748	0.901443	0.917532			550.4	1.286	1.31997	0.967222	0.964413	1.28377	1.13825	1.18954	0.937628					550.4	1.42692	1.32602
550.6	1.27886	1.28709	1.29495	0.999095	0.998923	0.999398	1.13131	1.05798	1.18257	0.984482	0.932135	0.910342			550.6	1.03406	1.17469	1.15252	1.24773	0.966614	0.963139	0.97267	0.966179	0.844281	1.17983	1.10441	1.20477	0.808036	1.07019	0.903156	0.919591			550.6	1.28327	1.31719	0.965072	0.962323	1.28085	1.13549	1.1862	0.935022					550.6	1.4266	1.32463
550.8	1.27831	1.28673	1.29422	0.998895	0.998768	0.999746	1.13115	1.05767	1.18234	0.983854	0.932155	0.910118			550.8	1.03557	1.17635	1.15389	1.24922	0.96787	0.964077	0.973847	0.967253	0.845291	1.18144	1.10562	1.20609	0.808894	1.07146	0.903855	0.920472			550.8	1.28187	1.31575	0.963917	0.961124	1.27945	1.13396	1.18445	0.9339					550.8	1.42597	1.32427
551	1.27652	1.28584	1.29339	0.998363	0.998803	0.999972	1.13093	1.05757	1.18148	0.983432	0.931509	0.909563			551	1.0383	1.17899	1.15624	1.25272	0.969385	0.96635	0.975919	0.970145	0.847086	1.18421	1.10837	1.2085	0.810943	1.07386	0.904898	0.922956			551	1.27886	1.31231	0.961991	0.958991	1.27636	1.13075	1.18122	0.93199					551	1.42454	1.32324
551.2	1.27569	1.28481	1.29276	0.997712	0.998596	0.999685	1.13062	1.05701	1.18105	0.983303	0.93089	0.909295			551.2	1.04003	1.18051	1.15782	1.25501	0.970858	0.96777	0.976901	0.971496	0.84815	1.18602	1.10951	1.21034	0.812484	1.07516	0.905824	0.924324			551.2	1.27696	1.31032	0.960616	0.957293	1.27411	1.12855	1.17905	0.930147					551.2	1.42377	1.32187
551.4	1.27508	1.28385	1.29209	0.997331	0.998072	0.999884	1.13046	1.0563	1.17989	0.983007	0.930204	0.908613			551.4	1.04248	1.18251	1.15961	1.25749	0.972838	0.969529	0.978488	0.973285	0.849316	1.18766	1.11087	1.2126	0.814058	1.0767	0.906953	0.926018			551.4	1.27457	1.30773	0.958694	0.955138	1.27128	1.12584	1.17636	0.927919					551.4	1.42257	1.32032
551.6	1.27426	1.28306	1.29173	0.996935	0.997532	0.999777	1.12973	1.05564	1.17903	0.982531	0.930076	0.908277			551.6	1.04438	1.18408	1.16106	1.25935	0.974096	0.970841	0.979577	0.974715	0.850398	1.1891	1.11236	1.21458	0.814873	1.07807	0.908111	0.927197			551.6	1.27244	1.30555	0.957226	0.953612	1.269	1.12362	1.17415	0.926378					551.6	1.42117	1.31983
551.8	1.27347	1.28232	1.29078	0.996298	0.997124	1	1.12924	1.05457	1.17748	0.981968	0.929953	0.907341			551.8	1.04613	1.18638	1.16268	1.26127	0.975518	0.972516	0.980926	0.976669	0.851663	1.19063	1.11405	1.21674	0.815844	1.07977	0.909395	0.928288			551.8	1.26972	1.30266	0.955322	0.951648	1.26617	1.12075	1.1715	0.924281					551.8	1.41999	1.31887
552	1.27237	1.28193	1.28946	0.99596	0.996713	0.999675	1.1287	1.05387	1.17703	0.981404	0.929738	0.906632			552	1.04792	1.18791	1.1641	1.2633	0.976614	0.97362	0.981952	0.977927	0.85226	1.19209	1.11526	1.21821	0.816765	1.08058	0.910297	0.929048			552	1.26719	1.30048	0.953637	0.95003	1.26366	1.11854	1.16918	0.922556					552	1.41856	1.31775
552.2	1.27086	1.28104	1.28798	0.995985	0.995956	0.99974	1.12816	1.05336	1.17608	0.980582	0.929237	0.905309			552.2	1.04961	1.18986	1.16577	1.2657	0.978	0.975216	0.983117	0.979424	0.853288	1.19369	1.11715	1.22025	0.818073	1.08185	0.911473	0.929931			552.2	1.26443	1.29764	0.951358	0.947999	1.26049	1.11567	1.16607	0.920526					552.2	1.41692	1.3166
552.4	1.26993	1.27992	1.28704	0.995598	0.995534	0.999772	1.12736	1.05231	1.17583	0.980003	0.928699	0.904434			552.4	1.05123	1.19165	1.16713	1.26715	0.979439	0.976595	0.984058	0.980846	0.854314	1.19478	1.11834	1.22186	0.819095	1.08303	0.912132	0.930986			552.4	1.26205	1.29505	0.949777	0.94607	1.25786	1.11334	1.16357	0.91866					552.4	1.41566	1.31556
552.6	1.26869	1.27824	1.28594	0.995373	0.995168	0.999777	1.1266	1.05152	1.17511	0.979249	0.92793	0.903891			552.6	1.05319	1.19351	1.16839	1.26905	0.980808	0.978656	0.985604	0.982552	0.855522	1.196	1.1199	1.22366	0.820399	1.08434	0.912837	0.932087			552.6	1.25942	1.29201	0.947827	0.943869	1.25489	1.11037	1.16053	0.916365					552.6	1.414	1.31427
552.8	1.26674	1.27727	1.28471	0.994465	0.993852	0.999491	1.12616	1.05087	1.17319	0.978079	0.926619	0.903335			552.8	1.05568	1.19511	1.17031	1.27112	0.982455	0.980628	0.986557	0.984614	0.856941	1.19765	1.12132	1.22565	0.821769	1.08542	0.914024	0.933334			552.8	1.25611	1.28841	0.945186	0.941368	1.25096	1.10658	1.15677	0.913544					552.8	1.41255	1.31268
553	1.26576	1.27643	1.28332	0.994085	0.993122	0.999653	1.12548	1.05032	1.17239	0.977331	0.926247	0.902683			553	1.05664	1.19625	1.17116	1.27233	0.983041	0.981451	0.987022	0.985372	0.857719	1.19848	1.12198	1.22646	0.822395	1.08612	0.914504	0.933897			553	1.25409	1.28659	0.943769	0.940042	1.24896	1.10465	1.15504	0.912169					553	1.41129	1.31181
553.2	1.26389	1.27471	1.28122	0.99278	0.991657	0.99934	1.12459	1.04876	1.17152	0.976236	0.92539	0.901473			553.2	1.05794	1.19815	1.17296	1.27498	0.984078	0.982674	0.98866	0.987406	0.858977	1.20023	1.12354	1.22852	0.823592	1.08714	0.915543	0.934985			553.2	1.25059	1.28266	0.940792	0.937184	1.24523	1.10146	1.15142	0.909251					553.2	1.40867	1.30904
553.4	1.26288	1.27359	1.27961	0.992353	0.991081	0.998844	1.12401	1.0481	1.1703	0.974965	0.924953	0.901002			553.4	1.05893	1.19955	1.17414	1.27655	0.985085	0.983844	0.989556	0.988462	0.859766	1.20137	1.12434	1.22984	0.824259	1.08834	0.916217	0.935805			553.4	1.2482	1.28019	0.939029	0.935333	1.24281	1.09886	1.14925	0.907193					553.4	1.40732	1.30743
553.6	1.26139	1.27215	1.27776	0.991503	0.990232	0.998032	1.12289	1.04669	1.16912	0.973751	0.924346	0.899872			553.6	1.06037	1.20111	1.17548	1.27849	0.986107	0.985355	0.9908	0.98968	0.860667	1.20253	1.12547	1.23135	0.825237	1.0891	0.916864	0.936529			553.6	1.2451	1.27719	0.936878	0.933012	1.23961	1.0957	1.14628	0.904766					553.6	1.4054	1.30521
553.8	1.2597	1.27073	1.2764	0.991128	0.989486	0.997485	1.12193	1.04574	1.16812	0.972997	0.9242	0.898634			553.8	1.06136	1.20234	1.17662	1.28002	0.986924	0.986518	0.991567	0.990841	0.861443	1.20336	1.1258	1.23257	0.825891	1.09007	0.917554	0.936894			553.8	1.24265	1.27467	0.935002	0.931066	1.23694	1.0932	1.14364	0.902761					553.8	1.40344	1.30406
554	1.25774	1.26934	1.27498	0.990519	0.987968	0.997019	1.12003	1.04459	1.16612	0.971892	0.923332	0.897162			554	1.06305	1.20325	1.17763	1.28214	0.987998	0.987728	0.99259	0.992076	0.861853	1.2045	1.12662	1.23397	0.827067	1.09133	0.91823	0.937503			554	1.23947	1.27139	0.932727	0.928703	1.23346	1.09002	1.14031	0.900384					554	1.40106	1.30203
554.2	1.25678	1.26815	1.27373	0.989721	0.986946	0.996287	1.11918	1.04369	1.16491	0.971401	0.922513	0.895893			554.2	1.06415	1.2041	1.17837	1.28339	0.989011	0.988787	0.993274	0.99247	0.862549	1.20521	1.12736	1.23503	0.827631	1.09208	0.918953	0.937923			554.2	1.23695	1.26894	0.93073	0.9267	1.23076	1.08754	1.13762	0.898172					554.2	1.39993	1.30041
554.4	1.25553	1.26684	1.27194	0.988771	0.985911	0.995189	1.11771	1.0425	1.16328	0.970631	0.921441	0.894213			554.4	1.06545	1.20548	1.17949	1.28459	0.990313	0.98998	0.994306	0.993025	0.863311	1.20598	1.12811	1.23625	0.827921	1.09267	0.919617	0.938426			554.4	1.23371	1.26589	0.928124	0.924224	1.22728	1.08442	1.1343	0.895473					554.4	1.39807	1.29836
554.6	1.25414	1.26588	1.27035	0.988089	0.984961	0.994829	1.11686	1.04133	1.16197	0.969466	0.920445	0.893219			554.6	1.06645	1.20659	1.18038	1.28557	0.99111	0.990722	0.994987	0.993833	0.864056	1.20651	1.12869	1.2371	0.827972	1.09329	0.919825	0.938567			554.6	1.23114	1.26317	0.926181	0.922423	1.22443	1.08173	1.13166	0.893495					554.6	1.39594	1.29635
554.8	1.25212	1.26415	1.26834	0.987235	0.983531	0.993856	1.11562	1.04043	1.16064	0.96818	0.919335	0.891595			554.8	1.06728	1.20793	1.18171	1.28696	0.992061	0.991712	0.995533	0.994903	0.86485	1.20784	1.12951	1.23804	0.828256	1.09404	0.920253	0.938824			554.8	1.22806	1.25956	0.923765	0.920155	1.22107	1.0784	1.12831	0.890919					554.8	1.39372	1.29413
555	1.25015	1.26189	1.26591	0.985946	0.982006	0.993554	1.11469	1.03891	1.15842	0.96634	0.917319	0.889941			555	1.06809	1.20961	1.1832	1.28811	0.99329	0.992704	0.99608	0.99574	0.865338	1.20898	1.13029	1.23852	0.828659	1.09481	0.920963	0.939421			555	1.22425	1.25526	0.920901	0.917023	1.21675	1.07437	1.12414	0.888031					555	1.3913	1.29153
555.2	1.24891	1.26068	1.26486	0.985172	0.981288	0.992771	1.11367	1.03875	1.15764	0.96529	0.916589	0.888936			555.2	1.0691	1.21008	1.18382	1.28893	0.994056	0.993069	0.996405	0.995932	0.865515	1.20979	1.13117	1.23894	0.829106	1.09546	0.921205	0.939981			555.2	1.22233	1.25312	0.919481	0.915548	1.21482	1.07247	1.12185	0.886389					555.2	1.38996	1.29004
555.4	1.24643	1.25781	1.26278	0.983871	0.979595	0.991946	1.11236	1.03701	1.15534	0.963186	0.914669	0.886985			555.4	1.07008	1.21156	1.18489	1.28982	0.994986	0.994272	0.997279	0.996959	0.866474	1.2109	1.1321	1.24006	0.830139	1.09638	0.921519	0.940484			555.4	1.21855	1.249	0.916406	0.912837	1.21103	1.06861	1.11759	0.883087					555.4	1.38772	1.28737
555.6	1.2449	1.25649	1.26109	0.982968	0.978631	0.99069	1.11121	1.03572	1.15424	0.961891	0.913516	0.886341			555.6	1.07093	1.21218	1.18554	1.29094	0.995574	0.994852	0.99769	0.99743	0.866761	1.21134	1.13213	1.24073	0.830287	1.09673	0.921804	0.940701			555.6	1.21591	1.2462	0.914462	0.910986	1.20815	1.06604	1.11477	0.880957					555.6	1.38569	1.28583
555.8	1.24271	1.25483	1.25881	0.981724	0.97714	0.989307	1.11026	1.03439	1.15261	0.96034	0.912012	0.885092			555.8	1.07219	1.21287	1.18641	1.29242	0.996114	0.995588	0.998543	0.997669	0.867315	1.21176	1.13217	1.24133	0.830196	1.09719	0.922099	0.941058			555.8	1.21263	1.24275	0.911924	0.908741	1.20469	1.06278	1.11154	0.878278					555.8	1.38346	1.28397
556	1.24124	1.25306	1.25697	0.980657	0.97604	0.988246	1.1087	1.03303	1.15145	0.95925	0.910907	0.883583			556	1.07286	1.21384	1.18724	1.29309	0.99671	0.995619	0.998873	0.998008	0.867537	1.21234	1.13243	1.24183	0.830102	1.098	0.922473	0.941269			556	1.2096	1.23986	0.909808	0.906619	1.20172	1.06011	1.10874	0.876					556	1.38142	1.28212
556.2	1.23952	1.25072	1.25492	0.97925	0.974679	0.987103	1.10691	1.03127	1.15033	0.957857	0.909449	0.881939			556.2	1.07365	1.21444	1.18819	1.29415	0.997187	0.99607	0.999375	0.998384	0.867795	1.21287	1.13272	1.24253	0.830013	1.09861	0.922784	0.941503			556.2	1.20605	1.23627	0.907337	0.903918	1.19806	1.05674	1.10522	0.873054					556.2	1.37892	1.27994
556.4	1.23747	1.24936	1.25329	0.978156	0.973644	0.98576	1.10602	1.03057	1.14944	0.956588	0.90787	0.880699			556.4	1.07457	1.21513	1.18865	1.29468	0.997694	0.996624	0.999654	0.998634	0.867799	1.21371	1.13292	1.24283	0.830049	1.09919	0.923166	0.94156			556.4	1.20328	1.23343	0.905512	0.901886	1.19506	1.0541	1.10233	0.870894					556.4	1.37725	1.27827
556.6	1.23522	1.24703	1.25119	0.976909	0.972483	0.984096	1.10473	1.02951	1.14827	0.955204	0.905696	0.879316			556.6	1.07568	1.21594	1.18934	1.2954	0.998051	0.997214	0.999958	0.998788	0.86816	1.2142	1.13299	1.24293	0.830037	1.09981	0.923335	0.941658			556.6	1.19968	1.22986	0.903081	0.899316	1.1912	1.05071	1.09879	0.868183					556.6	1.37516	1.27652
556.8	1.23331	1.24548	1.24961	0.975716	0.971545	0.982853	1.10379	1.02852	1.14719	0.954095	0.90417	0.877644			556.8	1.07609	1.21648	1.18962	1.29553	0.998272	0.997564	1	0.998861	0.868415	1.21452	1.133	1.24294	0.830232	1.10014	0.923287	0.941091			556.8	1.1968	1.22694	0.900998	0.897291	1.18808	1.04811	1.0956	0.865968					556.8	1.37286	1.27441
557	1.23091	1.24319	1.24764	0.974154	0.970267	0.981472	1.10231	1.02762	1.14552	0.952638	0.902237	0.875888			557	1.07661	1.21698	1.19003	1.29597	0.998682	0.998079	0.999998	0.998975	0.868452	1.21517	1.13301	1.24343	0.830295	1.10105	0.923513	0.940876			557	1.19307	1.22313	0.898517	0.894706	1.18435	1.04484	1.09192	0.863127					557	1.37058	1.27141
557.2	1.22835	1.24058	1.24512	0.972109	0.96837	0.979654	1.10119	1.02645	1.14369	0.950806	0.899501	0.873936			557.2	1.07724	1.21733	1.19037	1.29676	0.999147	0.99874	0.999937	0.999136	0.86875	1.21564	1.1336	1.24353	0.830277	1.10095	0.923334	0.940846			557.2	1.18865	1.21869	0.895536	0.891522	1.17982	1.04073	1.08761	0.859753					557.2	1.36719	1.26817
557.4	1.22709	1.23925	1.24348	0.971048	0.967866	0.978384	1.10081	1.02571	1.14337	0.94985	0.898466	0.872808			557.4	1.07753	1.21789	1.19065	1.29689	0.999125	0.998854	0.999839	0.999258	0.869051	1.2154	1.13361	1.24363	0.829704	1.10071	0.923435	0.94092			557.4	1.18644	1.21636	0.89398	0.889864	1.17751	1.03849	1.08551	0.858016					557.4	1.36563	1.26714
557.6	1.22368	1.23631	1.24077	0.969113	0.966441	0.976701	1.09921	1.02456	1.14189	0.947744	0.896491	0.870939			557.6	1.07803	1.21872	1.19145	1.2972	0.999241	0.998991	0.999631	0.999279	0.869199	1.21633	1.13396	1.24362	0.829677	1.10083	0.923528	0.940844			557.6	1.18154	1.21158	0.890743	0.886548	1.17276	1.03443	1.08127	0.854697					557.6	1.36207	1.26415
557.8	1.22209	1.23439	1.23892	0.967746	0.96501	0.975254	1.09819	1.02401	1.1413	0.946187	0.89482	0.86974			557.8	1.07866	1.219	1.19198	1.29764	0.999449	0.999128	0.999412	0.999488	0.86912	1.217	1.13435	1.24379	0.829574	1.10109	0.923596	0.940846			557.8	1.17868	1.20855	0.88853	0.884425	1.16983	1.03158	1.07831	0.852398					557.8	1.35998	1.26262
558	1.21984	1.23219	1.23669	0.966333	0.963297	0.973308	1.09694	1.02341	1.14027	0.944515	0.893199	0.867542			558	1.07902	1.21939	1.19234	1.29819	0.999705	0.9995	0.999457	0.999528	0.869097	1.21792	1.13471	1.24411	0.829163	1.10136	0.923703	0.940759			558	1.17466	1.20466	0.885894	0.881707	1.16599	1.02814	1.07456	0.849326					558	1.35732	1.26112
558.2	1.21771	1.23046	1.23484	0.964976	0.962011	0.971866	1.09564	1.02261	1.13955	0.942672	0.8919	0.866366			558.2	1.07949	1.21938	1.19218	1.29873	0.99989	0.999623	0.999676	0.99964	0.86948	1.21805	1.13475	1.24404	0.829007	1.10137	0.923319	0.940792			558.2	1.17133	1.20171	0.883702	0.879602	1.16281	1.02546	1.07168	0.846873					558.2	1.35459	1.25906
558.4	1.21486	1.22818	1.23205	0.963201	0.960182	0.969695	1.09437	1.02198	1.13898	0.940838	0.890155	0.86443			558.4	1.07975	1.21941	1.19203	1.29928	1	0.999947	0.999749	0.999955	0.869833	1.21829	1.13475	1.24427	0.828866	1.10119	0.923012	0.940273			558.4	1.16726	1.19785	0.880945	0.876884	1.15898	1.02209	1.06773	0.843739					558.4	1.35155	1.25608
558.6	1.21282	1.22579	1.22985	0.961647	0.958614	0.968302	1.09358	1.02117	1.13818	0.93967	0.888214	0.862905			558.6	1.07993	1.21964	1.19214	1.29938	0.999829	1	0.999401	0.999942	0.870147	1.21843	1.13455	1.24444	0.828495	1.10113	0.922837	0.940055			558.6	1.16405	1.19463	0.878748	0.874491	1.15572	1.01907	1.06465	0.84145					558.6	1.34914	1.25371
558.8	1.21027	1.22358	1.22784	0.959877	0.956744	0.966401	1.09243	1.02035	1.13736	0.93796	0.886249	0.861109			558.8	1.08003	1.21967	1.19221	1.29986	0.999337	0.999817	0.999199	0.999907	0.870279	1.21914	1.1346	1.24428	0.827689	1.10101	0.922647	0.939597			558.8	1.16012	1.1905	0.875944	0.871452	1.15133	1.01526	1.06074	0.838465					558.8	1.34577	1.25092
559	1.20806	1.22134	1.2261	0.958207	0.955237	0.964932	1.09208	1.01984	1.13627	0.936703	0.884455	0.859663			559	1.08	1.21949	1.1925	1.30033	0.9991	0.999529	0.999099	0.999871	0.870259	1.21942	1.1347	1.24425	0.827218	1.10083	0.922317	0.939245			559	1.15697	1.18749	0.873723	0.869137	1.14823	1.0123	1.05778	0.836098					559	1.34358	1.24818
559.2	1.20553	1.21856	1.22362	0.956345	0.953315	0.963153	1.09141	1.01921	1.13541	0.93494	0.882321	0.857509			559.2	1.07973	1.21917	1.19252	1.3006	0.999079	0.999181	0.999031	1	0.870122	1.22001	1.13497	1.24425	0.827003	1.10061	0.921821	0.938786			559.2	1.153	1.18363	0.870957	0.866375	1.14435	1.00861	1.05398	0.832964					559.2	1.34016	1.24493
559.4	1.20249	1.21574	1.2208	0.954141	0.950765	0.960653	1.09072	1.01837	1.13447	0.932608	0.879556	0.85564			559.4	1.07963	1.21875	1.19243	1.30097	0.998761	0.999685	0.998618	0.999725	0.869955	1.21999	1.1346	1.24327	0.826525	1.09942	0.921009	0.937823			559.4	1.14839	1.17881	0.86737	0.862973	1.13983	1.00421	1.04922	0.829089					559.4	1.33715	1.24142
559.6	1.20068	1.21408	1.21879	0.952962	0.949631	0.959255	1.09059	1.01805	1.13353	0.931245	0.878151	0.854			559.6	1.07973	1.21907	1.19204	1.30102	0.998854	0.999671	0.998689	0.999621	0.869847	1.22029	1.13464	1.24308	0.82623	1.099	0.920568	0.937326			559.6	1.14594	1.17633	0.865678	0.861191	1.13746	1.00198	1.04664	0.827412					559.6	1.3354	1.23936
559.8	1.19798	1.21119	1.21533	0.950633	0.947808	0.95701	1.08929	1.01703	1.13134	0.929227	0.876133	0.851334			559.8	1.07969	1.21879	1.19185	1.30139	0.998467	0.999216	0.998421	0.999594	0.869844	1.22003	1.13458	1.24289	0.825635	1.09827	0.920076	0.936727			559.8	1.14118	1.17134	0.861996	0.857386	1.13241	0.99742	1.0419	0.823693					559.8	1.33118	1.23599
560	1.19581	1.20943	1.21303	0.949115	0.946068	0.955458	1.08854	1.01633	1.13024	0.927256	0.874561	0.849582			560	1.07966	1.2185	1.19161	1.30165	0.998293	0.999031	0.998141	0.999598	0.869656	1.22011	1.13454	1.24282	0.82535	1.09717	0.919705	0.936193			560	1.13796	1.16801	0.859554	0.854951	1.12903	0.994313	1.03878	0.821176					560	1.3287	1.23355
560.2	1.19308	1.20692	1.21015	0.947303	0.943801	0.953225	1.08791	1.01533	1.12933	0.924732	0.872428	0.848046			560.2	1.07932	1.21786	1.19112	1.3019	0.998029	0.998522	0.997748	0.99956	0.86989	1.21962	1.13469	1.24251	0.824951	1.09611	0.919142	0.935762			560.2	1.13391	1.16371	0.856341	0.851924	1.12486	0.990408	1.03479	0.818079					560.2	1.32561	1.23054
560.4	1.19068	1.20512	1.20775	0.945772	0.941954	0.951502	1.08762	1.01462	1.12871	0.922469	0.870777	0.846661			560.4	1.07933	1.21755	1.19086	1.30186	0.997699	0.998198	0.997389	0.999324	0.869942	1.21967	1.13461	1.24208	0.824348	1.09554	0.918469	0.935077			560.4	1.13066	1.16018	0.853582	0.849472	1.12169	0.987168	1.0316	0.815569					560.4	1.32303	1.22839
560.6	1.18763	1.20238	1.20472	0.943946	0.939875	0.949187	1.0866	1.01345	1.12794	0.92045	0.868746	0.845311			560.6	1.07918	1.21737	1.19022	1.30159	0.997417	0.997895	0.996844	0.999293	0.8701	1.21983	1.13435	1.24158	0.823631	1.09485	0.917651	0.934339			560.6	1.12656	1.15567	0.850277	0.846332	1.1176	0.983266	1.02764	0.812518					560.6	1.32008	1.2257
560.8	1.1853	1.20004	1.20243	0.942349	0.938026	0.947288	1.08602	1.01296	1.12698	0.918951	0.867298	0.843975			560.8	1.07909	1.21718	1.19	1.30148	0.997031	0.997761	0.996345	0.99902	0.869671	1.22012	1.13399	1.24146	0.823454	1.09441	0.916949	0.933784			560.8	1.12328	1.15232	0.84765	0.843974	1.11453	0.980179	1.02417	0.809887					560.8	1.31688	1.22365
561	1.18254	1.19712	1.19918	0.940681	0.935791	0.944915	1.08559	1.01255	1.12658	0.917099	0.865309	0.842074			561	1.07871	1.21662	1.18946	1.30134	0.996592	0.997275	0.996032	0.998772	0.86975	1.21997	1.13373	1.24138	0.823112	1.0934	0.916237	0.933087			561	1.11932	1.14796	0.844678	0.840922	1.11053	0.976501	1.01988	0.806771					561	1.31316	1.22043
561.2	1.18014	1.19462	1.19682	0.939058	0.93437	0.942994	1.08463	1.0115	1.1259	0.915363	0.863908	0.840186			561.2	1.07797	1.21615	1.1885	1.30103	0.996032	0.996866	0.995811	0.998493	0.869695	1.21957	1.1333	1.24076	0.822396	1.09242	0.915857	0.932169			561.2	1.11604	1.14429	0.842266	0.838401	1.10723	0.97365	1.01652	0.804253					561.2	1.31049	1.21758
561.4	1.17707	1.19144	1.19416	0.936618	0.932296	0.940681	1.08393	1.0108	1.12514	0.91303	0.861807	0.838287			561.4	1.07738	1.21557	1.18764	1.3003	0.99554	0.995997	0.995307	0.998215	0.869672	1.21913	1.13277	1.23974	0.821728	1.09094	0.914985	0.931272			561.4	1.11204	1.13995	0.839119	0.835068	1.10309	0.970079	1.01234	0.801037					561.4	1.30689	1.21412
561.6	1.1735	1.18801	1.19043	0.933971	0.930066	0.937883	1.08375	1.01009	1.12476	0.910984	0.859	0.835517			561.6	1.0769	1.21501	1.18719	1.30001	0.994511	0.995005	0.994478	0.997527	0.8689	1.2191	1.13255	1.2398	0.820907	1.08966	0.913751	0.929816			561.6	1.10762	1.13481	0.835125	0.830948	1.09817	0.965366	1.00746	0.797143					561.6	1.30268	1.20995
561.8	1.17131	1.18568	1.18823	0.932048	0.928651	0.935829	1.08319	1.00963	1.12426	0.909224	0.85745	0.833567			561.8	1.07658	1.21466	1.18658	1.2994	0.993888	0.9945	0.994022	0.996856	0.86817	1.21904	1.13216	1.23934	0.820514	1.08855	0.91287	0.928827			561.8	1.10435	1.13142	0.832622	0.828402	1.09496	0.962513	1.00432	0.7945					561.8	1.29975	1.2074
562	1.16828	1.18301	1.18548	0.930305	0.926903	0.933472	1.08264	1.00875	1.12343	0.906914	0.85515	0.831228			562	1.07618	1.21413	1.18601	1.29916	0.993054	0.99391	0.99361	0.996164	0.867816	1.21863	1.13122	1.23898	0.819902	1.08726	0.911569	0.927668			562	1.10018	1.12709	0.829596	0.825329	1.09089	0.958831	1.00024	0.79116					562	1.29618	1.20478
562.2	1.16613	1.18013	1.1824	0.928539	0.925163	0.931619	1.08221	1.0085	1.12347	0.904895	0.853669	0.829599			562.2	1.07582	1.21366	1.18531	1.29824	0.992622	0.993471	0.992771	0.99526	0.867804	1.21831	1.13112	1.23842	0.819147	1.08629	0.910921	0.926664			562.2	1.09689	1.12355	0.82699	0.822574	1.08769	0.955745	0.996801	0.788707					562.2	1.29298	1.20215
562.4	1.16298	1.17678	1.17908	0.926425	0.923171	0.92946	1.08186	1.00827	1.12344	0.902552	0.851847	0.827216			562.4	1.07524	1.21286	1.18424	1.29692	0.991793	0.992806	0.991712	0.994327	0.867843	1.21802	1.13071	1.23787	0.818724	1.08512	0.910087	0.925681			562.4	1.09259	1.11888	0.823921	0.819247	1.08364	0.952012	0.992587	0.785699					562.4	1.28968	1.19896
562.6	1.16016	1.17434	1.17648	0.924774	0.921136	0.927738	1.08136	1.00792	1.12298	0.900565	0.849936	0.82556			562.6	1.07465	1.21215	1.18323	1.29634	0.991029	0.992024	0.990599	0.993707	0.867521	1.21793	1.1306	1.23708	0.81774	1.08401	0.909379	0.924877			562.6	1.08932	1.11532	0.821432	0.816591	1.08041	0.94903	0.989373	0.783378					562.6	1.28724	1.19647
562.8	1.15667	1.17137	1.17318	0.922306	0.918805	0.925702	1.08114	1.00754	1.12315	0.898276	0.847847	0.823131			562.8	1.07404	1.21118	1.18179	1.29558	0.990074	0.990885	0.989318	0.993327	0.867408	1.21777	1.13026	1.23701	0.81672	1.08289	0.908459	0.923914			562.8	1.08525	1.11094	0.818461	0.813413	1.07618	0.945325	0.985278	0.780374					562.8	1.28316	1.19328
563	1.15427	1.16829	1.17071	0.920265	0.916739	0.924151	1.08116	1.008	1.12325	0.896348	0.845868	0.821721			563	1.07322	1.21038	1.18133	1.29463	0.989256	0.990056	0.988558	0.992809	0.867303	1.21728	1.12988	1.23646	0.816336	1.08164	0.907468	0.923002			563	1.08189	1.10744	0.815805	0.810971	1.07285	0.942278	0.981909	0.777708					563	1.28003	1.19101
563.2	1.15101	1.16467	1.16786	0.917831	0.913905	0.921658	1.08116	1.00845	1.12367	0.893713	0.843694	0.819694			563.2	1.07201	1.20927	1.18049	1.29331	0.988235	0.989179	0.987779	0.991641	0.86712	1.21702	1.12966	1.23583	0.815462	1.08042	0.906692	0.921688			563.2	1.07774	1.10303	0.812538	0.807944	1.06907	0.938611	0.977775	0.774556					563.2	1.27649	1.18754
563.4	1.1469	1.16058	1.16412	0.91465	0.910795	0.919077	1.08139	1.00874	1.1248	0.891515	0.841163	0.817364			563.4	1.07071	1.20838	1.17914	1.29165	0.987197	0.987959	0.986405	0.99027	0.866382	1.21693	1.12922	1.2352	0.814322	1.07894	0.905356	0.920045			563.4	1.07259	1.09779	0.808894	0.804064	1.06426	0.93445	0.972471	0.770869					563.4	1.27288	1.18344
563.6	1.14439	1.15741	1.16187	0.912811	0.90893	0.917464	1.08126	1.00903	1.12491	0.889809	0.839023	0.815253			563.6	1.0704	1.20769	1.17842	1.2909	0.986378	0.987236	0.985599	0.989633	0.865852	1.21707	1.12919	1.23473	0.813273	1.07747	0.904213	0.919149			563.6	1.06927	1.09414	0.806423	0.801434	1.06101	0.931832	0.968957	0.768233					563.6	1.27001	1.18076
563.8	1.14109	1.15337	1.1585	0.910643	0.906782	0.914999	1.08128	1.00937	1.12493	0.887521	0.836631	0.812929			563.8	1.06935	1.2071	1.17714	1.28968	0.98528	0.986213	0.984686	0.988771	0.865065	1.21662	1.12901	1.23428	0.812027	1.07575	0.902839	0.918171			563.8	1.06512	1.08982	0.803253	0.798086	1.05677	0.928389	0.964629	0.7651					563.8	1.26622	1.17772
564	1.13821	1.1504	1.15551	0.908532	0.90484	0.913151	1.08159	1.01007	1.12541	0.885092	0.834414	0.810198			564	1.06871	1.20606	1.176	1.2887	0.98447	0.985119	0.983978	0.987655	0.864738	1.21622	1.12842	1.23319	0.81095	1.07439	0.901887	0.91668			564	1.06178	1.08634	0.800741	0.795448	1.05358	0.92565	0.961411	0.762658					564	1.26292	1.17427
564.2	1.13494	1.14687	1.1519	0.906192	0.90232	0.910952	1.08245	1.01075	1.12609	0.882272	0.831786	0.806997			564.2	1.06789	1.20487	1.17446	1.28742	0.98335	0.984061	0.983211	0.986565	0.864495	1.21599	1.12783	1.23233	0.809837	1.07229	0.900514	0.914679			564.2	1.0578	1.0818	0.797542	0.792161	1.04964	0.922178	0.957373	0.759395					564.2	1.25927	1.17051
564.4	1.13222	1.14402	1.14939	0.904014	0.900217	0.908769	1.08285	1.01084	1.12604	0.880552	0.829897	0.805196			564.4	1.06698	1.20415	1.17336	1.28627	0.982297	0.983224	0.982183	0.985611	0.864105	1.21591	1.12765	1.2315	0.809042	1.07122	0.899475	0.913763			564.4	1.05427	1.07826	0.794831	0.78954	1.04652	0.919091	0.954017	0.756963					564.4	1.25621	1.16755
564.6	1.12874	1.1402	1.14599	0.901359	0.897747	0.906647	1.08381	1.01181	1.1264	0.878421	0.827463	0.802914			564.6	1.06616	1.20301	1.17201	1.28497	0.981227	0.981908	0.981019	0.98452	0.863509	1.21559	1.12738	1.23076	0.807705	1.07003	0.89809	0.912468			564.6	1.04987	1.0739	0.791531	0.786383	1.04265	0.915454	0.949672	0.75387					564.6	1.25216	1.16395
564.8	1.12603	1.13746	1.14299	0.899422	0.89571	0.904531	1.08478	1.01247	1.12633	0.876353	0.825497	0.800552			564.8	1.0652	1.20177	1.17091	1.2839	0.980326	0.980899	0.979853	0.983683	0.86305	1.21516	1.12726	1.2302	0.806845	1.06876	0.897079	0.911158			564.8	1.04649	1.07035	0.788997	0.783867	1.03958	0.912594	0.946302	0.751371					564.8	1.24888	1.16071
565	1.12243	1.13392	1.13934	0.897183	0.89316	0.902266	1.0857	1.01291	1.12654	0.873864	0.823113	0.798283			565	1.06401	1.20033	1.16959	1.28242	0.97913	0.979802	0.978472	0.982458	0.862746	1.21463	1.12672	1.22911	0.805455	1.06711	0.895651	0.909709			565	1.04206	1.06578	0.785892	0.78076	1.03552	0.909106	0.941927	0.748298					565	1.245	1.1568
565.2	1.11995	1.13109	1.13672	0.895382	0.890963	0.900772	1.08676	1.01386	1.12743	0.871762	0.820999	0.79674			565.2	1.063	1.19896	1.16835	1.28144	0.978012	0.978705	0.97729	0.981417	0.862163	1.21437	1.12659	1.22846	0.804014	1.06586	0.894734	0.908458			565.2	1.03859	1.06214	0.783212	0.778166	1.03247	0.906274	0.938259	0.74592					565.2	1.24205	1.15368
565.4	1.11667	1.12763	1.13309	0.892942	0.888123	0.898424	1.08774	1.0151	1.12904	0.869491	0.818826	0.794864			565.4	1.06138	1.19732	1.16673	1.27999	0.976632	0.977216	0.975794	0.98003	0.861245	1.21394	1.12693	1.22765	0.802329	1.06409	0.893715	0.906814			565.4	1.03449	1.0579	0.779804	0.774928	1.02881	0.902838	0.933998	0.743014					565.4	1.23806	1.14945
565.6	1.11235	1.12399	1.12902	0.889872	0.885288	0.895291	1.08941	1.016	1.13029	0.867145	0.815255	0.791382			565.6	1.05998	1.19548	1.16478	1.27824	0.974977	0.975978	0.974443	0.979126	0.860668	1.21373	1.12619	1.22664	0.801109	1.06183	0.891646	0.904715			565.6	1.02943	1.05263	0.775713	0.771236	1.02415	0.898731	0.928813	0.739082					565.6	1.2341	1.14497
565.8	1.10968	1.12154	1.12626	0.887777	0.883371	0.892839	1.09059	1.01712	1.13114	0.865264	0.812999	0.789489			565.8	1.05849	1.19427	1.16362	1.27728	0.973897	0.975098	0.973387	0.978168	0.860229	1.21372	1.12609	1.22604	0.799823	1.06032	0.890618	0.903356			565.8	1.02606	1.04902	0.772913	0.768571	1.02119	0.896033	0.925137	0.736687					565.8	1.23065	1.14174
566	1.10613	1.11817	1.12299	0.885223	0.880942	0.889914	1.09212	1.01885	1.13258	0.863049	0.810854	0.787475			566	1.05733	1.19283	1.16228	1.27576	0.97248	0.97374	0.971927	0.976973	0.859816	1.21364	1.12574	1.22535	0.798514	1.05874	0.889405	0.901859			566	1.02196	1.04448	0.7697	0.765351	1.0175	0.892733	0.920704	0.733738					566	1.22635	1.13778
566.2	1.10311	1.11541	1.11985	0.883493	0.87903	0.887754	1.09325	1.01956	1.13355	0.861225	0.80876	0.785417			566.2	1.05629	1.19145	1.16122	1.2745	0.971296	0.972359	0.97062	0.97566	0.859404	1.21347	1.12548	1.22454	0.797279	1.0573	0.888144	0.900798			566.2	1.01849	1.04093	0.767157	0.762626	1.01481	0.890013	0.917305	0.731436					566.2	1.22351	1.13461
566.4	1.09938	1.11202	1.11664	0.881366	0.876494	0.884381	1.09462	1.02008	1.13523	0.858981	0.80622	0.782594			566.4	1.05514	1.18973	1.15948	1.27308	0.969627	0.970641	0.968935	0.973966	0.858936	1.21322	1.12479	1.22385	0.795306	1.05543	0.886698	0.899426			566.4	1.0142	1.03631	0.763904	0.759135	1.01139	0.886923	0.913199	0.728546					566.4	1.21948	1.13074
566.6	1.09659	1.10894	1.1133	0.879265	0.874669	0.88204	1.0959	1.0219	1.13584	0.857243	0.803548	0.780325			566.6	1.05432	1.18845	1.15799	1.27181	0.968557	0.969485	0.967646	0.972881	0.858473	1.2129	1.1248	1.22303	0.794285	1.05414	0.885349	0.898006			566.6	1.01074	1.0327	0.761247	0.756462	1.00866	0.884203	0.909715	0.726181					566.6	1.2159	1.12759
566.8	1.09305	1.10546	1.1092	0.876667	0.872652	0.879547	1.09757	1.02396	1.13737	0.854855	0.800467	0.777515			566.8	1.05306	1.18663	1.15633	1.27052	0.967252	0.968197	0.965993	0.971282	0.858059	1.21275	1.12456	1.22218	0.792994	1.05231	0.883823	0.896217			566.8	1.0065	1.02815	0.75806	0.753125	1.00524	0.881199	0.905542	0.723241					566.8	1.21096	1.12372
567	1.0902	1.10279	1.10583	0.874224	0.87067	0.87741	1.09915	1.02555	1.13883	0.85292	0.799013	0.775922			567	1.05185	1.18507	1.15507	1.26912	0.966066	0.966721	0.964809	0.969692	0.857723	1.21264	1.12409	1.22102	0.792085	1.05125	0.883105	0.894893			567	1.00318	1.02469	0.755596	0.750519	1.00258	0.878453	0.902372	0.721147					567	1.20757	1.12052
567.2	1.08668	1.09963	1.10183	0.871679	0.867878	0.874972	1.10108	1.0277	1.14071	0.850763	0.796458	0.773518			567.2	1.05041	1.18286	1.15326	1.26736	0.964642	0.965103	0.963084	0.967937	0.857502	1.21245	1.12378	1.21975	0.790999	1.04953	0.882189	0.893243			567.2	0.998973	1.02023	0.752438	0.747328	0.999345	0.875106	0.898356	0.718335					567.2	1.204	1.11653
567.4	1.08275	1.09579	1.09792	0.868685	0.864773	0.871824	1.10503	1.0304	1.14244	0.848364	0.793525	0.770872			567.4	1.04857	1.18047	1.15074	1.26536	0.96287	0.96336	0.960987	0.966188	0.857238	1.21232	1.12426	1.21971	0.789472	1.04762	0.880353	0.89119			567.4	0.993923	1.01498	0.748635	0.743445	0.995519	0.871149	0.89339	0.714932					567.4	1.19927	1.11229
567.6	1.07984	1.09312	1.09475	0.866686	0.862905	0.869846	1.10661	1.03191	1.14429	0.846196	0.791225	0.769321			567.6	1.04713	1.17878	1.14907	1.26374	0.961726	0.962087	0.95968	0.964658	0.856791	1.21177	1.1239	1.219	0.787989	1.04611	0.87931	0.890015			567.6	0.990652	1.01143	0.746011	0.740704	0.992919	0.868736	0.88999	0.71273					567.6	1.19572	1.10914
567.8	1.07619	1.08956	1.09071	0.864324	0.860657	0.867528	1.10917	1.03403	1.14717	0.84325	0.7881	0.766995			567.8	1.04566	1.17625	1.14687	1.26206	0.960181	0.960608	0.957832	0.962931	0.855997	1.21135	1.12344	1.21803	0.785618	1.04388	0.877764	0.888614			567.8	0.986477	1.00688	0.742748	0.737271	0.98983	0.86582	0.885848	0.709863					567.8	1.19125	1.10535
568	1.07324	1.08712	1.0879	0.86217	0.858795	0.864903	1.11127	1.03595	1.15007	0.841425	0.785814	0.765352			568	1.04441	1.17451	1.14536	1.26084	0.958794	0.959396	0.95635	0.96143	0.856124	1.21113	1.12291	1.21758	0.784504	1.04237	0.877014	0.886983			568	0.983161	1.00319	0.740339	0.734569	0.987178	0.863504	0.882731	0.707743					568	1.18792	1.10248
568.2	1.06965	1.0835	1.08406	0.859499	0.856492	0.862024	1.11396	1.03855	1.15356	0.838727	0.783162	0.763467			568.2	1.0429	1.17225	1.14334	1.25901	0.957079	0.957919	0.954432	0.95967	0.856019	1.21101	1.12258	1.21703	0.782239	1.04048	0.875932	0.885467			568.2	0.978893	0.998565	0.737185	0.731225	0.983834	0.860621	0.878755	0.70529					568.2	1.18418	1.09882
568.4	1.06668	1.0807	1.08122	0.857172	0.854786	0.859079	1.11681	1.04116	1.15591	0.836676	0.781254	0.761518			568.4	1.04167	1.17054	1.14164	1.25749	0.955817	0.956473	0.952908	0.958557	0.855843	1.21089	1.12253	1.21675	0.780871	1.0389	0.874805	0.883966			568.4	0.975489	0.995023	0.734638	0.728516	0.981455	0.858434	0.875656	0.703168					568.4	1.18052	1.09584
568.6	1.06261	1.07665	1.07775	0.854466	0.852579	0.855581	1.11978	1.04366	1.15836	0.83426	0.77841	0.758907			568.6	1.04005	1.16866	1.13977	1.25528	0.953929	0.954875	0.951268	0.956817	0.856135	1.21061	1.1225	1.21645	0.779173	1.03706	0.87308	0.8822			568.6	0.971214	0.990524	0.731484	0.725091	0.978441	0.855547	0.871658	0.700331					568.6	1.17654	1.09174
568.8	1.05964	1.07336	1.07485	0.852291	0.850516	0.853554	1.12233	1.04584	1.1608	0.832269	0.775938	0.757271			568.8	1.0389	1.16705	1.13807	1.25379	0.952422	0.953252	0.949638	0.955613	0.855838	1.21034	1.12214	1.21555	0.77817	1.03556	0.872045	0.88104			568.8	0.967704	0.986801	0.728966	0.722456	0.975888	0.853195	0.868579	0.698207					568.8	1.17298	1.08902
569	1.05596	1.06945	1.07141	0.849657	0.848089	0.850697	1.12569	1.04925	1.1639	0.829532	0.773165	0.755216			569	1.03716	1.1649	1.13581	1.25225	0.950777	0.95123	0.947458	0.953931	0.854801	1.21014	1.12238	1.21471	0.776367	1.0336	0.870753	0.879495			569	0.963341	0.982304	0.726013	0.719128	0.972947	0.850313	0.864755	0.695648					569	1.16849	1.08523
569.2	1.05158	1.06521	1.06686	0.846672	0.844923	0.847707	1.13019	1.05268	1.16814	0.826503	0.770526	0.752043			569.2	1.03579	1.16244	1.13326	1.24964	0.948501	0.949097	0.94562	0.95168	0.854702	1.20952	1.1222	1.21389	0.774377	1.03193	0.869107	0.876885			569.2	0.958014	0.977289	0.72234	0.715095	0.969313	0.846947	0.860713	0.692527					569.2	1.16377	1.08088
569.4	1.04853	1.06205	1.06393	0.844522	0.84315	0.84541	1.13352	1.05505	1.17073	0.824783	0.768515	0.750173			569.4	1.03439	1.16053	1.13129	1.24796	0.946991	0.948041	0.944403	0.949943	0.854509	1.2091	1.12209	1.21344	0.773225	1.0303	0.867727	0.875317			569.4	0.954583	0.973612	0.719731	0.712465	0.966792	0.8449	0.8575	0.690422					569.4	1.16044	1.07795
569.6	1.04509	1.05833	1.06041	0.841877	0.840737	0.842359	1.13733	1.05832	1.1741	0.822743	0.764839	0.748615			569.6	1.03257	1.15858	1.12898	1.24567	0.945054	0.946372	0.942624	0.947685	0.854239	1.20911	1.12217	1.21333	0.771461	1.02799	0.865562	0.873029			569.6	0.95031	0.969219	0.71645	0.709198	0.963753	0.84233	0.853216	0.68778					569.6	1.15614	1.07349
569.8	1.04188	1.05552	1.05729	0.839614	0.838571	0.840317	1.1406	1.0607	1.17712	0.820791	0.762796	0.746744			569.8	1.03077	1.15686	1.12703	1.24362	0.943387	0.945035	0.941072	0.946413	0.854134	1.20899	1.12244	1.21264	0.769807	1.02628	0.864345	0.871254			569.8	0.946844	0.965667	0.713876	0.706576	0.961318	0.84006	0.849993	0.685867					569.8	1.15309	1.07015
570	1.03797	1.05178	1.05393	0.8369	0.835874	0.837978	1.14527	1.06375	1.18172	0.818093	0.760138	0.744567			570	1.02839	1.15447	1.12473	1.24121	0.941458	0.943287	0.939141	0.944519	0.85371	1.20893	1.12278	1.21192	0.767833	1.02379	0.862568	0.869527			570	0.94267	0.961201	0.710605	0.703357	0.95826	0.83732	0.846384	0.683357					570	1.14891	1.06615
570.2	1.03507	1.0483	1.05116	0.834828	0.833819	0.835368	1.14869	1.06684	1.18489	0.816224	0.757679	0.742761			570.2	1.02697	1.15267	1.12258	1.23945	0.939766	0.942139	0.937718	0.943166	0.853417	1.20889	1.12317	1.21169	0.765876	1.02257	0.861018	0.868117			570.2	0.939274	0.95757	0.707842	0.700867	0.956097	0.835222	0.843396	0.68141					570.2	1.14561	1.06315
570.4	1.03138	1.04437	1.04806	0.832147	0.831039	0.832271	1.1534	1.07038	1.18949	0.813664	0.754528	0.740122			570.4	1.02519	1.15047	1.11996	1.2369	0.937683	0.940504	0.935898	0.941433	0.852976	1.20859	1.12344	1.21167	0.76361	1.02025	0.858718	0.866183			570.4	0.935026	0.953211	0.704503	0.697576	0.953316	0.832662	0.839354	0.678756					570.4	1.14163	1.05924
570.6	1.02816	1.0416	1.04539	0.829627	0.828744	0.829911	1.15708	1.07347	1.19381	0.811492	0.752158	0.738614			570.6	1.02341	1.14848	1.11837	1.23495	0.936041	0.939145	0.93429	0.939703	0.852326	1.2084	1.12333	1.21075	0.761758	1.0183	0.857524	0.864725			570.6	0.93168	0.949438	0.702029	0.694838	0.951036	0.830797	0.836134	0.676823					570.6	1.13826	1.05593
570.8	1.02427	1.03744	1.04183	0.826965	0.825785	0.827104	1.16139	1.07689	1.19886	0.808633	0.749404	0.737397			570.8	1.02117	1.14606	1.1164	1.23273	0.933851	0.93737	0.932121	0.937675	0.852045	1.208	1.12355	1.20975	0.759834	1.01595	0.856049	0.8632			570.8	0.927448	0.944878	0.698861	0.69141	0.947954	0.828433	0.832244	0.67449					570.8	1.1339	1.05205
571	1.01994	1.033	1.03707	0.823498	0.821855	0.823495	1.16777	1.08162	1.20436	0.806062	0.746432	0.734453			571	1.01918	1.14304	1.11381	1.23033	0.931121	0.934758	0.92991	0.935702	0.852006	1.20813	1.12407	1.20991	0.757518	1.01407	0.854423	0.860451			571	0.922188	0.939661	0.694967	0.687455	0.944612	0.825548	0.828382	0.671644					571	1.12926	1.04756
571.2	1.01769	1.03097	1.03479	0.821661	0.820077	0.821716	1.1709	1.08402	1.20751	0.804868	0.744658	0.732888			571.2	1.0179	1.14178	1.11266	1.2288	0.929708	0.933515	0.928852	0.934574	0.852204	1.208	1.12405	1.20961	0.75679	1.01286	0.853075	0.858997			571.2	0.919655	0.93706	0.693043	0.685603	0.942867	0.824099	0.826094	0.670255					571.2	1.1266	1.04538
571.4	1.01362	1.02677	1.03089	0.81865	0.816902	0.818893	1.17609	1.08879	1.21264	0.802994	0.741911	0.730185			571.4	1.01554	1.13964	1.11038	1.22627	0.927291	0.931729	0.926661	0.932636	0.851559	1.20846	1.12463	1.20912	0.75528	1.01093	0.850882	0.8567			571.4	0.91537	0.932656	0.689574	0.682291	0.940273	0.821656	0.822381	0.667961					571.4	1.12266	1.04133
571.6	1.01074	1.0234	1.02784	0.816202	0.814493	0.816929	1.1803	1.09219	1.21678	0.80154	0.739893	0.727809			571.6	1.01376	1.13793	1.10868	1.22445	0.925544	0.930076	0.925189	0.930703	0.850837	1.20865	1.12465	1.20819	0.754276	1.00927	0.84951	0.855131			571.6	0.911928	0.929194	0.686989	0.679687	0.938373	0.819696	0.819557	0.66598					571.6	1.11961	1.03784
571.8	1.00622	1.01864	1.02302	0.813043	0.810274	0.813858	1.1866	1.09687	1.22333	0.799118	0.736582	0.724807			571.8	1.01107	1.13494	1.10594	1.22143	0.922934	0.927655	0.922811	0.92809	0.850655	1.20887	1.12488	1.20707	0.752562	1.00744	0.847924	0.853121			571.8	0.90683	0.923729	0.683002	0.675795	0.935115	0.816528	0.815078	0.663141					571.8	1.11502	1.0329
572	1.00241	1.0151	1.01916	0.810106	0.807422	0.810897	1.19325	1.10204	1.22912	0.797011	0.734309	0.722296			572	1.009	1.13245	1.10344	1.21928	0.921224	0.926022	0.920636	0.926064	0.850595	1.20928	1.12538	1.20679	0.751173	1.00536	0.846489	0.85066			572	0.902613	0.919425	0.67973	0.672692	0.933011	0.814316	0.811181	0.66084					572	1.11061	1.02932
572.2	0.999317	1.01233	1.01609	0.807732	0.805279	0.808806	1.19862	1.1064	1.2331	0.79501	0.732522	0.719786			572.2	1.00717	1.13041	1.10164	1.21739	0.919794	0.92488	0.919064	0.92415	0.850677	1.20977	1.12606	1.20718	0.749177	1.00397	0.845176	0.848598			572.2	0.89928	0.915984	0.677134	0.670018	0.931341	0.812661	0.807877	0.659053					572.2	1.10739	1.02605
572.4	0.995399	1.00862	1.01231	0.804958	0.802091	0.805943	1.20434	1.11189	1.23944	0.792528	0.729902	0.717033			572.4	1.00504	1.12819	1.09952	1.21434	0.917354	0.922719	0.916868	0.92185	0.851047	1.21037	1.12662	1.20731	0.747501	1.00183	0.843519	0.846511			572.4	0.89527	0.911436	0.673783	0.666722	0.929354	0.810713	0.804063	0.656752					572.4	1.10331	1.02256
572.6	0.992323	1.00532	1.00902	0.802795	0.799614	0.803736	1.20875	1.11639	1.24477	0.790432	0.72734	0.715162			572.6	1.00317	1.12624	1.09763	1.21207	0.915522	0.920915	0.914946	0.920088	0.850837	1.2108	1.12725	1.20745	0.745775	0.99963	0.842036	0.844803			572.6	0.891904	0.907759	0.671232	0.664016	0.927606	0.809083	0.800704	0.65495					572.6	1.09995	1.01934
572.8	0.988524	1.0015	1.0049	0.799593	0.79629	0.800693	1.21459	1.12142	1.25121	0.787745	0.724286	0.71226			572.8	1.00109	1.12371	1.09533	1.20967	0.913493	0.918827	0.91236	0.918339	0.85071	1.21091	1.12736	1.20693	0.743642	0.99749	0.840184	0.842645			572.8	0.887799	0.903528	0.667923	0.660726	0.924941	0.806946	0.797046	0.652621					572.8	1.09611	1.01577
573	0.985553	0.99843	1.00186	0.797292	0.793693	0.798397	1.21979	1.12589	1.2566	0.785511	0.722377	0.71051			573	0.999304	1.12173	1.09322	1.20723	0.911881	0.917043	0.910396	0.916924	0.850732	1.21108	1.12774	1.20689	0.742445	0.995629	0.838955	0.841062			573	0.884398	0.900062	0.665296	0.658222	0.923094	0.80543	0.794088	0.65094					573	1.09277	1.01302
573.2	0.981995	0.994167	0.998043	0.794551	0.790422	0.795459	1.2265	1.13202	1.26341	0.783333	0.719687	0.707985			573.2	0.99746	1.11881	1.09088	1.20508	0.910223	0.914777	0.908037	0.914674	0.851058	1.21156	1.12788	1.20708	0.740736	0.993349	0.837555	0.838639			573.2	0.879966	0.895799	0.66224	0.654947	0.920942	0.803727	0.790151	0.648564					573.2	1.08858	1.00919
573.4	0.979327	0.99115	0.994999	0.792503	0.787844	0.793103	1.23215	1.13628	1.26865	0.781254	0.717779	0.706641			573.4	0.995742	1.11677	1.08893	1.20298	0.908501	0.912905	0.906382	0.9131	0.85173	1.21193	1.12801	1.20707	0.73927	0.991545	0.836468	0.836533			573.4	0.876561	0.89245	0.659693	0.652283	0.919078	0.802188	0.787034	0.646844					573.4	1.08495	1.00635
573.6	0.974773	0.986916	0.990205	0.789222	0.783547	0.789969	1.23968	1.14352	1.27739	0.778401	0.714666	0.703554			573.6	0.992657	1.11355	1.08591	1.19965	0.905791	0.910074	0.903721	0.910617	0.850876	1.21212	1.12845	1.20657	0.737401	0.988365	0.834902	0.833785			573.6	0.871186	0.887202	0.655964	0.64808	0.916891	0.799881	0.782265	0.644398					573.6	1.07982	1.00197
573.8	0.970998	0.982834	0.985921	0.786496	0.780733	0.787112	1.24632	1.14915	1.28443	0.777207	0.712559	0.701704			573.8	0.990144	1.11111	1.0833	1.19713	0.903349	0.907698	0.901543	0.90835	0.851466	1.21285	1.12927	1.20672	0.736139	0.986438	0.833649	0.831592			573.8	0.866916	0.88289	0.652629	0.644882	0.914933	0.797911	0.778605	0.642426					573.8	1.07526	0.998378
574	0.968189	0.97925	0.982748	0.784202	0.778527	0.785021	1.25165	1.15375	1.29048	0.775382	0.710631	0.699606			574	0.988446	1.10917	1.08131	1.19471	0.901282	0.905547	0.899867	0.906651	0.851554	1.21387	1.12979	1.20704	0.734622	0.984494	0.832083	0.829875			574	0.863467	0.879492	0.650057	0.642394	0.913433	0.796318	0.775486	0.640897					574	1.07189	0.995657
574.2	0.964104	0.975038	0.978798	0.781353	0.775778	0.781871	1.25909	1.1603	1.29782	0.77306	0.707781	0.696832			574.2	0.986263	1.10678	1.07859	1.19165	0.899159	0.903341	0.897721	0.904465	0.852789	1.21485	1.13077	1.20651	0.732544	0.982163	0.830615	0.827688			574.2	0.859179	0.875296	0.64703	0.639383	0.911518	0.794514	0.771247	0.638689					574.2	1.06801	0.991652
574.4	0.961003	0.971802	0.975757	0.779084	0.773446	0.779264	1.26488	1.16577	1.30342	0.771357	0.705411	0.695217			574.4	0.984395	1.10474	1.07643	1.18893	0.897624	0.90154	0.895774	0.902496	0.85312	1.21532	1.13144	1.20582	0.731177	0.97988	0.829021	0.826407			574.4	0.855821	0.871994	0.644679	0.636803	0.909955	0.793003	0.767673	0.637048					574.4	1.06482	0.988211
574.6	0.957006	0.967732	0.97224	0.776217	0.770266	0.776335	1.27182	1.17242	1.31075	0.769378	0.703093	0.693147			574.6	0.982179	1.10206	1.07381	1.18594	0.895724	0.899089	0.893381	0.900324	0.852464	1.21562	1.13229	1.20572	0.729451	0.977396	0.827606	0.823701			574.6	0.851645	0.867696	0.641585	0.633468	0.908119	0.791269	0.763854	0.634833					574.6	1.06095	0.984281
574.8	0.954053	0.9648	0.969302	0.774078	0.767762	0.773798	1.27806	1.17658	1.31659	0.768046	0.700992	0.691397			574.8	0.980767	1.09969	1.07167	1.18344	0.893988	0.897162	0.891561	0.898455	0.852579	1.21555	1.13251	1.20537	0.72799	0.975048	0.826095	0.821826			574.8	0.8482	0.864292	0.639065	0.630839	0.906547	0.79006	0.760381	0.633143					574.8	1.0572	0.981225
575	0.949579	0.96008	0.964729	0.77051	0.764113	0.770378	1.28695	1.18422	1.32748	0.765618	0.697572	0.689206			575	0.977762	1.09646	1.06809	1.17983	0.891219	0.894636	0.888643	0.895774	0.853136	1.21586	1.13333	1.2061	0.725625	0.972321	0.823954	0.81948			575	0.843153	0.859399	0.635342	0.626785	0.904249	0.788258	0.755827	0.630558					575	1.05239	0.976808
575.2	0.945849	0.956301	0.960682	0.767574	0.760997	0.767354	1.29419	1.19101	1.33642	0.763296	0.694569	0.687428			575.2	0.975282	1.09391	1.06523	1.17657	0.888854	0.892416	0.886198	0.893274	0.853092	1.21647	1.1345	1.20678	0.723889	0.969494	0.821693	0.817787			575.2	0.839061	0.855272	0.63236	0.62347	0.902259	0.786795	0.751778	0.628516					575.2	1.04826	0.97319
575.4	0.942789	0.953141	0.957392	0.765368	0.75837	0.76534	1.29971	1.19628	1.34293	0.761273	0.692538	0.685956			575.4	0.973174	1.09184	1.06307	1.17384	0.886813	0.890406	0.884279	0.891254	0.853346	1.21708	1.13563	1.20717	0.722599	0.967389	0.819798	0.81642			575.4	0.83581	0.851823	0.629966	0.620796	0.900382	0.785377	0.748545	0.627031					575.4	1.04512	0.970156
575.6	0.939079	0.948888	0.953693	0.762321	0.75475	0.761839	1.30806	1.20171	1.35101	0.758962	0.689778	0.684419			575.6	0.971046	1.08879	1.06013	1.17108	0.884531	0.887952	0.881859	0.88896	0.853511	1.21802	1.13607	1.20679	0.72068	0.964479	0.817839	0.813853			575.6	0.831601	0.847495	0.626818	0.617665	0.898674	0.783516	0.744587	0.625174					575.6	1.04087	0.965981
575.8	0.935988	0.945643	0.950591	0.759618	0.752034	0.759495	1.31556	1.20618	1.35764	0.757181	0.686928	0.682919			575.8	0.969232	1.08637	1.05788	1.16891	0.882817	0.88606	0.880011	0.886967	0.853671	1.21855	1.13669	1.20729	0.719087	0.961869	0.815844	0.811824			575.8	0.827995	0.844141	0.624271	0.615162	0.897492	0.782135	0.741154	0.623694					575.8	1.03746	0.96273
576	0.932525	0.941758	0.946702	0.756539	0.749166	0.756066	1.32459	1.21276	1.36728	0.755274	0.684994	0.681147			576	0.96654	1.08325	1.05545	1.16579	0.880485	0.883842	0.877561	0.884477	0.854228	1.21883	1.13689	1.2076	0.718061	0.959869	0.814631	0.809618			576	0.824005	0.839924	0.620877	0.611876	0.895704	0.780793	0.737446	0.62202					576	1.03331	0.959098
576.2	0.929681	0.938647	0.943735	0.754255	0.746852	0.753561	1.33183	1.21828	1.37637	0.753737	0.683156	0.679312			576.2	0.964553	1.08106	1.05345	1.16327	0.878417	0.88181	0.875597	0.882356	0.854382	1.21927	1.13767	1.20929	0.716865	0.958307	0.813826	0.808068			576.2	0.820735	0.836649	0.618431	0.60937	0.894661	0.780037	0.734577	0.620745					576.2	1.02967	0.956153
576.4	0.925858	0.934758	0.939918	0.751211	0.743704	0.751016	1.34041	1.22626	1.38843	0.752659	0.68085	0.676808			576.4	0.962047	1.07844	1.05038	1.16037	0.8759	0.879515	0.873508	0.879728	0.854443	1.22038	1.139	1.21084	0.714985	0.955959	0.812422	0.805972			576.4	0.816718	0.832493	0.615384	0.606055	0.893052	0.779287	0.730614	0.619033					576.4	1.02526	0.951958
576.6	0.92262	0.931602	0.9368	0.74848	0.74124	0.74872	1.34747	1.23247	1.3975	0.751288	0.67873	0.675428			576.6	0.960142	1.0765	1.04805	1.15767	0.873503	0.877698	0.871658	0.877868	0.854134	1.22144	1.14043	1.21177	0.713932	0.954228	0.810983	0.804777			576.6	0.813389	0.829052	0.612869	0.603442	0.891892	0.778572	0.727585	0.61776					576.6	1.02211	0.948565
576.8	0.917773	0.92687	0.932104	0.744761	0.737905	0.744801	1.35802	1.24011	1.41243	0.750215	0.674798	0.672092			576.8	0.957134	1.07287	1.0447	1.15387	0.87082	0.874673	0.86859	0.874957	0.855038	1.22222	1.14121	1.21554	0.712388	0.950539	0.808183	0.801755			576.8	0.808576	0.823736	0.608929	0.600049	0.889334	0.7778	0.722685	0.615345					576.8	1.01682	0.943407
577	0.913644	0.923151	0.928451	0.741671	0.734875	0.74201	1.36738	1.24793	1.42421	0.747832	0.671916	0.670264			577	0.954853	1.06984	1.04192	1.15093	0.868262	0.872258	0.865877	0.872518	0.85533	1.22375	1.14254	1.21846	0.709577	0.948312	0.806367	0.799558			577	0.804568	0.819507	0.606122	0.596878	0.887866	0.777291	0.718611	0.613479					577	1.01239	0.939541
577.2	0.910593	0.920514	0.925505	0.739402	0.732184	0.739798	1.37509	1.2545	1.43328	0.746267	0.669706	0.668678			577.2	0.953066	1.06734	1.03966	1.14844	0.866463	0.870296	0.863723	0.870575	0.855176	1.22503	1.1436	1.22041	0.707791	0.946312	0.804856	0.797697			577.2	0.801391	0.816163	0.603778	0.594406	0.886853	0.776915	0.715451	0.611987					577.2	1.00923	0.936541
577.4	0.906893	0.916874	0.921317	0.73611	0.728962	0.736746	1.38415	1.26235	1.44459	0.744012	0.666536	0.66621			577.4	0.950022	1.06441	1.03642	1.14535	0.86399	0.868021	0.860999	0.867768	0.855463	1.22574	1.14521	1.22274	0.705696	0.943589	0.802291	0.795553			577.4	0.797473	0.811894	0.600466	0.591411	0.885345	0.776701	0.71143	0.610132					577.4	1.0047	0.932456
577.6	0.903964	0.914001	0.918201	0.733547	0.7265	0.73424	1.39142	1.26773	1.45408	0.742944	0.664628	0.664787			577.6	0.947825	1.06181	1.03411	1.14259	0.861909	0.865936	0.858654	0.865373	0.854989	1.22625	1.14587	1.2249	0.703805	0.941558	0.800114	0.794027			577.6	0.794392	0.808403	0.597861	0.588954	0.884173	0.776355	0.708454	0.608952					577.6	1.00107	0.929624
577.8	0.900296	0.909908	0.914809	0.73037	0.723422	0.731449	1.40167	1.27507	1.46757	0.740418	0.661726	0.662675			577.8	0.945087	1.05908	1.03115	1.14009	0.859187	0.863493	0.85605	0.863026	0.855115	1.22668	1.147	1.22798	0.701384	0.938674	0.798111	0.791418			577.8	0.790318	0.804099	0.594864	0.586012	0.882314	0.77615	0.704718	0.606995					577.8	0.99681	0.925969
578	0.897537	0.906888	0.911622	0.727933	0.721021	0.729019	1.40967	1.28096	1.47722	0.738665	0.659702	0.660946			578	0.94308	1.05689	1.02871	1.13762	0.857237	0.861771	0.854143	0.861113	0.855931	1.2276	1.14783	1.23024	0.699527	0.936713	0.797053	0.78995			578	0.787146	0.800739	0.592538	0.583684	0.88117	0.775859	0.701781	0.605599					578	0.993515	0.922905
578.2	0.892882	0.901829	0.90682	0.724151	0.717463	0.725647	1.42141	1.29037	1.49078	0.735945	0.656148	0.659438			578.2	0.940065	1.05375	1.02513	1.13371	0.853935	0.858646	0.851072	0.857918	0.856753	1.22926	1.14939	1.23346	0.697564	0.93302	0.794848	0.78734			578.2	0.782365	0.795852	0.588988	0.579998	0.879867	0.775285	0.696896	0.603755					578.2	0.988619	0.918266
578.4	0.888998	0.897858	0.903013	0.721035	0.714417	0.722942	1.4313	1.29849	1.50252	0.734424	0.653855	0.657447			578.4	0.937361	1.05088	1.0222	1.13076	0.851407	0.855756	0.848524	0.855461	0.857602	1.23079	1.15093	1.23601	0.695767	0.930667	0.79346	0.784894			578.4	0.778354	0.791668	0.585854	0.576928	0.878867	0.775065	0.693117	0.602242					578.4	0.984382	0.914212
578.6	0.885957	0.894799	0.899904	0.718569	0.711861	0.720816	1.43902	1.30467	1.51249	0.733335	0.652517	0.655782			578.6	0.93499	1.04847	1.01985	1.12834	0.84951	0.853424	0.846421	0.8535	0.858484	1.23201	1.15156	1.23779	0.694399	0.929284	0.79302	0.78297			578.6	0.774846	0.788308	0.583379	0.574436	0.877811	0.775056	0.690498	0.601075					578.6	0.981026	0.910979
578.8	0.882251	0.890794	0.895811	0.715242	0.708928	0.717513	1.44844	1.31318	1.52678	0.731527	0.649468	0.654167			578.8	0.932127	1.04542	1.0166	1.12505	0.846959	0.850649	0.844146	0.850984	0.858506	1.23336	1.15215	1.2409	0.691874	0.926266	0.791612	0.781138			578.8	0.770693	0.784061	0.580474	0.571498	0.876611	0.775394	0.687045	0.599729					578.8	0.976806	0.907211
579	0.879356	0.887993	0.892524	0.712649	0.706747	0.715163	1.4555	1.32032	1.53762	0.730366	0.647143	0.652873			579	0.929759	1.04295	1.01422	1.12213	0.844891	0.848429	0.842113	0.848848	0.858407	1.2343	1.15288	1.24326	0.690198	0.923639	0.790335	0.779723			579	0.767462	0.780845	0.57828	0.569183	0.875189	0.775665	0.684075	0.59851					579	0.973428	0.904475
579.2	0.875365	0.88403	0.888584	0.709918	0.703791	0.71229	1.46443	1.3283	1.54952	0.728525	0.644767	0.650518			579.2	0.92702	1.04023	1.01102	1.11854	0.842174	0.846017	0.83949	0.84622	0.858914	1.23545	1.1541	1.24556	0.688054	0.921303	0.788765	0.777982			579.2	0.763686	0.776764	0.575523	0.566211	0.873633	0.775312	0.68071	0.59671					579.2	0.969447	0.900618
579.4	0.871942	0.880877	0.885626	0.707623	0.701337	0.710027	1.47182	1.33517	1.55876	0.726573	0.642955	0.648349			579.4	0.924991	1.03791	1.00851	1.11581	0.840205	0.844163	0.837316	0.844132	0.859079	1.23727	1.15545	1.24757	0.686042	0.919003	0.787528	0.776044			579.4	0.760495	0.773435	0.573408	0.563907	0.872671	0.774997	0.677851	0.595154					579.4	0.966357	0.897156
579.6	0.867782	0.877011	0.88154	0.704524	0.698274	0.707268	1.48123	1.34151	1.56813	0.724279	0.640034	0.645482			579.6	0.922381	1.0349	1.00521	1.11252	0.837667	0.841918	0.834781	0.841441	0.859206	1.23885	1.15693	1.24867	0.683401	0.915801	0.785525	0.774029			579.6	0.756528	0.769311	0.570414	0.560827	0.871148	0.773962	0.67385	0.593278					579.6	0.962335	0.893505
579.8	0.864748	0.874028	0.878526	0.701926	0.695862	0.704958	1.48864	1.34576	1.57631	0.721625	0.637773	0.643242			579.8	0.920249	1.03241	1.00277	1.11005	0.835622	0.840023	0.832515	0.839409	0.859415	1.23947	1.15696	1.24989	0.681659	0.913431	0.784122	0.772043			579.8	0.753364	0.765966	0.567993	0.558433	0.86971	0.773013	0.670854	0.591881					579.8	0.959239	0.890728
580	0.860526	0.869658	0.874465	0.698672	0.692791	0.701614	1.49975	1.35471	1.58931	0.71943	0.635237	0.640802			580	0.916402	1.02849	0.999034	1.10618	0.83279	0.83696	0.82919	0.835614	0.859895	1.24053	1.15809	1.25094	0.678434	0.910213	0.781635	0.769899			580	0.748611	0.761113	0.564458	0.55471	0.868612	0.772195	0.66628	0.589861					580	0.954312	0.886429
580.2	0.856762	0.865666	0.870242	0.695486	0.690013	0.698395	1.50745	1.3629	1.59957	0.716782	0.633207	0.639251			580.2	0.913669	1.02556	0.995908	1.10292	0.829801	0.834446	0.826585	0.832949	0.859267	1.24161	1.1589	1.25142	0.676223	0.908164	0.780251	0.768359			580.2	0.744784	0.757224	0.561592	0.551841	0.867035	0.771529	0.663155	0.588595					580.2	0.950072	0.882689
580.4	0.853912	0.862132	0.867027	0.693018	0.687597	0.695789	1.51433	1.36816	1.60736	0.715134	0.631279	0.637402			580.4	0.911334	1.02315	0.993533	1.09997	0.827671	0.832458	0.824499	0.830703	0.859267	1.2422	1.15899	1.25208	0.674415	0.905998	0.7788	0.766248			580.4	0.741713	0.754133	0.559136	0.549539	0.865808	0.771079	0.660617	0.587284					580.4	0.946763	0.879547
580.6	0.850038	0.858181	0.863166	0.6903	0.684675	0.692619	1.52225	1.37474	1.61792	0.712563	0.629025	0.635994			580.6	0.908751	1.02022	0.990754	1.09644	0.825043	0.830073	0.82173	0.828075	0.859355	1.24351	1.15946	1.2537	0.672562	0.90328	0.777079	0.764339			580.6	0.737667	0.750152	0.556319	0.546483	0.864146	0.769987	0.657482	0.585817					580.6	0.942593	0.875522
580.8	0.846896	0.855151	0.859993	0.687961	0.682506	0.690391	1.52868	1.3797	1.62663	0.711275	0.627097	0.634244			580.8	0.906731	1.01775	0.988414	1.09364	0.822799	0.828044	0.819725	0.826189	0.859327	1.24391	1.15932	1.25561	0.671702	0.901627	0.775897	0.761931			580.8	0.73453	0.746988	0.553971	0.544176	0.862542	0.769277	0.654969	0.584628					580.8	0.939613	0.872331
581	0.843113	0.851151	0.855853	0.6851	0.679486	0.687457	1.53705	1.38716	1.6364	0.709406	0.625201	0.633269			581	0.903879	1.01476	0.98522	1.0903	0.82026	0.825236	0.817093	0.823428	0.860061	1.24471	1.16062	1.257	0.670291	0.899522	0.774656	0.75982			581	0.730585	0.742901	0.551214	0.541134	0.861024	0.768544	0.651463	0.583124					581	0.935756	0.868348
581.2	0.839862	0.848135	0.852568	0.682848	0.677133	0.68505	1.54369	1.39317	1.64378	0.708267	0.623844	0.632259			581.2	0.901553	1.01199	0.982572	1.08759	0.817999	0.822855	0.814899	0.821152	0.860777	1.24584	1.16165	1.25763	0.669508	0.897991	0.773443	0.758309			581.2	0.727512	0.739651	0.548927	0.538659	0.859849	0.767925	0.648508	0.582198					581.2	0.932693	0.865197
581.4	0.834744	0.843393	0.848144	0.679339	0.673712	0.681656	1.5537	1.40221	1.65495	0.706587	0.619873	0.630289			581.4	0.898109	1.00829	0.979199	1.08362	0.814543	0.81954	0.811492	0.817727	0.860441	1.24747	1.16306	1.25872	0.667496	0.894868	0.771111	0.755915			581.4	0.723017	0.734821	0.545262	0.535086	0.858031	0.766559	0.644085	0.580603					581.4	0.92842	0.860856
581.6	0.830956	0.839529	0.844136	0.676667	0.670644	0.67892	1.56085	1.4084	1.66393	0.704054	0.61692	0.628376			581.6	0.89506	1.0052	0.976291	1.08002	0.812193	0.817252	0.808803	0.814851	0.859564	1.24844	1.16348	1.25973	0.665318	0.891759	0.769355	0.753934			581.6	0.719194	0.730738	0.542435	0.532244	0.856343	0.765469	0.640986	0.579032					581.6	0.924513	0.857219
581.8	0.828022	0.836492	0.841078	0.674483	0.668362	0.67647	1.56692	1.41273	1.67207	0.70218	0.614423	0.626654			581.8	0.893088	1.00236	0.973879	1.07729	0.810237	0.815376	0.806855	0.812843	0.859289	1.24893	1.16363	1.26078	0.663466	0.889206	0.767447	0.752102			581.8	0.71641	0.727372	0.540161	0.530092	0.854891	0.764669	0.638149	0.577808					581.8	0.921495	0.854377
582	0.823874	0.832928	0.83722	0.671634	0.665424	0.673533	1.5746	1.41937	1.68061	0.699814	0.610791	0.624385			582	0.890485	0.999175	0.970955	1.07385	0.807357	0.812755	0.80389	0.809874	0.85882	1.24956	1.1647	1.2613	0.661531	0.886487	0.76525	0.74978			582	0.712557	0.723442	0.53705	0.527322	0.853737	0.763811	0.63477	0.575997					582	0.917518	0.850882
582.2	0.820871	0.829926	0.834074	0.669543	0.66341	0.671433	1.58027	1.42462	1.68891	0.698669	0.608748	0.621931			582.2	0.888427	0.996566	0.968505	1.07093	0.805156	0.810757	0.801716	0.807574	0.858467	1.2498	1.1654	1.2618	0.660009	0.884695	0.763506	0.747578			582.2	0.709572	0.720346	0.534604	0.525003	0.852656	0.762944	0.63215	0.574691					582.2	0.914272	0.847766
582.4	0.817214	0.825869	0.830293	0.666816	0.660452	0.668657	1.58776	1.43018	1.69718	0.696872	0.605898	0.620053			582.4	0.885828	0.993368	0.965217	1.06777	0.802349	0.807895	0.799031	0.805023	0.857784	1.25058	1.16562	1.26286	0.658372	0.882425	0.761594	0.745314			582.4	0.705638	0.716551	0.531669	0.522103	0.851054	0.762013	0.628892	0.57335					582.4	0.910053	0.843973
582.6	0.814209	0.822866	0.827233	0.664573	0.658125	0.666583	1.59475	1.43442	1.70403	0.694937	0.603541	0.618325			582.6	0.883686	0.990729	0.962659	1.0651	0.799985	0.805728	0.79704	0.803135	0.8578	1.25119	1.16578	1.26335	0.656602	0.880724	0.760183	0.743395			582.6	0.702598	0.71339	0.529322	0.519775	0.850067	0.761071	0.626124	0.572232					582.6	0.906486	0.840817
582.8	0.810314	0.818335	0.822575	0.660775	0.654538	0.663076	1.6036	1.44232	1.71523	0.693118	0.601242	0.616404			582.8	0.880106	0.986703	0.95922	1.06102	0.796629	0.802118	0.794045	0.799794	0.857955	1.25178	1.1659	1.26401	0.654491	0.878076	0.757704	0.739376			582.8	0.698308	0.708815	0.525942	0.516419	0.848536	0.760087	0.622691	0.570057					582.8	0.901208	0.836233
583	0.806823	0.814502	0.818622	0.658179	0.651769	0.660188	1.60898	1.44845	1.72274	0.690608	0.598591	0.614726			583	0.877275	0.983639	0.956192	1.05764	0.793522	0.799254	0.791423	0.79706	0.856251	1.25234	1.16702	1.26349	0.65185	0.875588	0.755845	0.736752			583	0.694528	0.704892	0.523157	0.513545	0.847258	0.759289	0.619501	0.568446					583	0.897315	0.832058
583.2	0.803804	0.811368	0.815522	0.655923	0.649313	0.657739	1.61404	1.45413	1.72892	0.688949	0.596906	0.613452			583.2	0.875037	0.981002	0.953883	1.0548	0.791201	0.79696	0.789299	0.794835	0.855082	1.25342	1.16826	1.26325	0.650124	0.874131	0.754481	0.734425			583.2	0.691569	0.70178	0.521004	0.511326	0.846296	0.758576	0.617134	0.567169					583.2	0.893976	0.829226
583.4	0.799891	0.807886	0.811608	0.652924	0.646255	0.654768	1.62173	1.4604	1.73594	0.687401	0.594108	0.612464			583.4	0.872144	0.97802	0.950755	1.05129	0.788497	0.794309	0.786284	0.792131	0.854796	1.25429	1.16953	1.26389	0.648718	0.871299	0.753057	0.732401			583.4	0.687842	0.698021	0.518151	0.508612	0.844805	0.757211	0.614133	0.565823					583.4	0.890192	0.825536
583.6	0.797167	0.805043	0.808648	0.650566	0.643827	0.652574	1.62762	1.46483	1.74157	0.686622	0.591994	0.611738			583.6	0.869847	0.975376	0.948289	1.04823	0.786245	0.79196	0.78394	0.789962	0.854845	1.25482	1.17005	1.26447	0.647676	0.869116	0.75182	0.730492			583.6	0.684889	0.69498	0.51586	0.506364	0.843782	0.755989	0.611408	0.564729					583.6	0.887158	0.822475
583.8	0.793563	0.801437	0.804959	0.647635	0.640853	0.649775	1.63507	1.47061	1.74802	0.685477	0.588843	0.609597			583.8	0.867069	0.972009	0.944851	1.04496	0.78351	0.789354	0.780949	0.787192	0.854316	1.25482	1.17108	1.26413	0.646028	0.866589	0.749651	0.728194			583.8	0.681262	0.69119	0.512975	0.503443	0.842156	0.754645	0.607733	0.563421					583.8	0.883374	0.818636
584	0.79086	0.798539	0.801764	0.6452	0.638568	0.647437	1.64055	1.47484	1.75262	0.68509	0.586051	0.607435			584	0.86455	0.969254	0.942272	1.04222	0.781329	0.78728	0.778868	0.785164	0.853539	1.25447	1.17181	1.26326	0.644529	0.864662	0.748073	0.725915			584	0.678351	0.688243	0.51077	0.501236	0.841052	0.753617	0.604911	0.562396					584	0.880363	0.815757
584.2	0.786445	0.794261	0.797865	0.641817	0.635462	0.644385	1.64683	1.48046	1.76022	0.681109	0.582503	0.602327			584.2	0.861134	0.965209	0.938441	1.03817	0.778248	0.784101	0.77543	0.781888	0.85151	1.25544	1.1717	1.26272	0.640587	0.860331	0.745876	0.722154			584.2	0.673721	0.683814	0.507517	0.497817	0.839509	0.752106	0.600292	0.560227					584.2	0.875375	0.811639
584.4	0.784105	0.791953	0.7957	0.640118	0.633592	0.643032	1.64935	1.48253	1.76484	0.679954	0.580914	0.601182			584.4	0.85916	0.963499	0.936695	1.03596	0.776836	0.78257	0.773737	0.780364	0.850804	1.25557	1.1713	1.26381	0.638734	0.8589	0.744928	0.721257			584.4	0.671601	0.681631	0.50566	0.49621	0.838551	0.751401	0.598566	0.559548					584.4	0.872767	0.809621
584.6	0.780205	0.787727	0.791287	0.636849	0.630235	0.639513	1.65513	1.48551	1.77492	0.677035	0.576623	0.599646			584.6	0.855849	0.959894	0.932778	1.03195	0.773537	0.779412	0.770957	0.777127	0.849051	1.25381	1.17021	1.26372	0.634947	0.854933	0.742485	0.718514			584.6	0.667221	0.677178	0.502485	0.493152	0.835909	0.749817	0.595207	0.557245					584.6	0.868263	0.805236
584.8	0.776747	0.784224	0.787769	0.634106	0.627239	0.636597	1.66168	1.48945	1.78135	0.675459	0.575406	0.597782			584.8	0.853053	0.956175	0.929451	1.02842	0.770973	0.776698	0.768253	0.7745	0.847777	1.25245	1.16975	1.26264	0.633376	0.853002	0.740277	0.716432			584.8	0.663635	0.673483	0.499886	0.490542	0.834275	0.748802	0.592151	0.555785					584.8	0.863691	0.801281
585	0.7738	0.781279	0.785002	0.631922	0.624858	0.634205	1.66705	1.49344	1.78586	0.674331	0.574145	0.595506			585	0.850869	0.953327	0.926886	1.0254	0.768741	0.774556	0.766101	0.772315	0.847006	1.25168	1.16928	1.26176	0.631678	0.850719	0.738234	0.714086			585	0.660708	0.670668	0.497715	0.488263	0.833022	0.748019	0.589481	0.554468					585	0.860214	0.797887
585.2	0.770308	0.777518	0.781194	0.629127	0.6225	0.631359	1.67122	1.49693	1.79118	0.671345	0.570718	0.593358			585.2	0.848214	0.949955	0.923546	1.02211	0.765584	0.771601	0.763272	0.769455	0.845346	1.25085	1.1685	1.26109	0.628662	0.847965	0.736311	0.711923			585.2	0.657156	0.667014	0.495155	0.485581	0.83131	0.746329	0.586415	0.552891					585.2	0.856578	0.794042
585.4	0.767631	0.774614	0.778432	0.626839	0.620406	0.62912	1.67451	1.49956	1.79468	0.669134	0.568803	0.59212			585.4	0.845688	0.947217	0.920828	1.01928	0.763352	0.769597	0.761076	0.767346	0.844558	1.25044	1.16778	1.26085	0.626209	0.846004	0.734364	0.710004			585.4	0.654386	0.664156	0.493037	0.483474	0.829615	0.745015	0.583687	0.551744					585.4	0.853445	0.790831
585.6	0.763242	0.770212	0.774156	0.623406	0.616855	0.62586	1.68122	1.50312	1.79946	0.667243	0.56637	0.591523			585.6	0.842028	0.94328	0.91683	1.01535	0.760061	0.766594	0.757894	0.76447	0.844685	1.24995	1.16729	1.2596	0.62466	0.842751	0.732441	0.707068			585.6	0.650132	0.659713	0.489828	0.480173	0.827359	0.743113	0.580325	0.54948					585.6	0.84911	0.78642
585.8	0.76105	0.767917	0.771828	0.621495	0.615209	0.624018	1.68387	1.50473	1.80275	0.666585	0.564769	0.58973			585.8	0.839876	0.941247	0.914977	1.01297	0.758795	0.764732	0.756327	0.762642	0.844596	1.24878	1.16664	1.25907	0.623673	0.840615	0.73028	0.705552			585.8	0.648065	0.65768	0.488036	0.478556	0.825849	0.742471	0.578445	0.548327					585.8	0.846602	0.78424
586	0.756554	0.763764	0.767426	0.61801	0.611972	0.620844	1.68824	1.50802	1.81043	0.663787	0.560721	0.587319			586	0.836407	0.937614	0.911323	1.00889	0.755508	0.761781	0.752916	0.759421	0.843676	1.248	1.16667	1.25866	0.621672	0.836657	0.728194	0.703413			586	0.643732	0.653332	0.48479	0.475647	0.823679	0.740682	0.574596	0.546512					586	0.842143	0.780603
586.2	0.7527	0.760089	0.763897	0.615227	0.609125	0.618194	1.69143	1.5106	1.81537	0.662123	0.557858	0.585157			586.2	0.833473	0.934427	0.908187	1.00566	0.752931	0.759013	0.750328	0.756552	0.840892	1.24665	1.16562	1.25802	0.620095	0.834544	0.725993	0.701504			586.2	0.640181	0.649633	0.48228	0.47302	0.821888	0.739132	0.571828	0.544809					586.2	0.838227	0.776722
586.4	0.749627	0.757163	0.760815	0.612958	0.606796	0.616019	1.69516	1.51193	1.81915	0.660448	0.555866	0.584082			586.4	0.831204	0.9316	0.905563	1.00304	0.751054	0.756901	0.748042	0.754178	0.839954	1.24581	1.16405	1.25782	0.618209	0.833026	0.724169	0.69994			586.4	0.637461	0.646716	0.480147	0.470944	0.820188	0.738018	0.56957	0.543436					586.4	0.834719	0.773785
586.6	0.74619	0.753605	0.757035	0.610035	0.604026	0.61325	1.69949	1.51374	1.82211	0.657385	0.552946	0.580099			586.6	0.828223	0.928475	0.902293	0.999332	0.74852	0.754333	0.745157	0.75144	0.83958	1.24446	1.16243	1.25711	0.615712	0.829416	0.722262	0.697205			586.6	0.634108	0.643401	0.47741	0.468268	0.818312	0.736412	0.566389	0.541824					586.6	0.831314	0.770154
586.8	0.743396	0.751026	0.754158	0.60803	0.601952	0.610831	1.70137	1.51476	1.82417	0.655218	0.55057	0.578392			586.8	0.825889	0.925676	0.899844	0.996379	0.746229	0.752188	0.743035	0.749139	0.839111	1.24308	1.16068	1.25612	0.613248	0.827071	0.720478	0.695056			586.8	0.631474	0.640678	0.475308	0.466141	0.816574	0.734994	0.563859	0.540483					586.8	0.828274	0.767163
587	0.739165	0.746731	0.749835	0.604667	0.598706	0.607492	1.70462	1.51654	1.83051	0.651994	0.54788	0.575084			587	0.822552	0.921819	0.896149	0.992413	0.743377	0.748623	0.740114	0.746024	0.837755	1.24086	1.15842	1.25445	0.610651	0.823992	0.718158	0.692006			587	0.627285	0.63648	0.472491	0.463115	0.813997	0.733218	0.560656	0.538412					587	0.824056	0.763107
587.2	0.736912	0.744454	0.747853	0.60316	0.596936	0.605751	1.70571	1.51736	1.83379	0.650197	0.546151	0.572886			587.2	0.82068	0.920186	0.894287	0.990242	0.741742	0.746928	0.738589	0.744418	0.836889	1.24009	1.15782	1.25373	0.60983	0.822618	0.71725	0.690202			587.2	0.62523	0.634213	0.470958	0.461604	0.812361	0.732139	0.559044	0.537092					587.2	0.821608	0.761027
587.4	0.73257	0.739681	0.743901	0.599743	0.593795	0.602311	1.70927	1.51869	1.83835	0.648284	0.54316	0.571499			587.4	0.816974	0.916131	0.890507	0.985912	0.738489	0.743177	0.735565	0.741078	0.835092	1.23897	1.15518	1.25244	0.606852	0.81943	0.714407	0.686969			587.4	0.62113	0.629977	0.467837	0.45851	0.809648	0.729918	0.555806	0.534708					587.4	0.81714	0.756867
587.6	0.729178	0.735992	0.740111	0.596775	0.59042	0.599513	1.71254	1.5194	1.84152	0.645724	0.541117	0.570262			587.6	0.814291	0.912595	0.887526	0.982627	0.735596	0.740373	0.732727	0.738424	0.834607	1.2373	1.15414	1.25095	0.604697	0.816916	0.712384	0.684988			587.6	0.618015	0.626478	0.465426	0.455886	0.807645	0.728112	0.553371	0.533078					587.6	0.813606	0.753137
587.8	0.726407	0.732985	0.737396	0.594375	0.588174	0.597195	1.71427	1.52076	1.84293	0.643386	0.53901	0.568434			587.8	0.812031	0.909844	0.884696	0.979803	0.733577	0.73832	0.730458	0.736147	0.833945	1.23656	1.15303	1.24968	0.602778	0.814619	0.710299	0.682536			587.8	0.615354	0.623641	0.463579	0.453805	0.805758	0.726514	0.551015	0.531505					587.8	0.810681	0.750431
588	0.722913	0.729199	0.734085	0.591295	0.585811	0.594466	1.71549	1.52235	1.84426	0.64003	0.536096	0.565624			588	0.808845	0.906595	0.881416	0.976524	0.730694	0.735682	0.727368	0.733361	0.83324	1.23645	1.15225	1.24795	0.599211	0.812223	0.707991	0.679744			588	0.611989	0.62019	0.460888	0.451201	0.8035	0.724609	0.548024	0.529509					588	0.806988	0.746621
588.2	0.719917	0.726247	0.731289	0.588851	0.583943	0.592162	1.71628	1.52289	1.84514	0.638034	0.533585	0.563711			588.2	0.806435	0.90409	0.87868	0.974049	0.728433	0.733521	0.725096	0.731135	0.832424	1.23559	1.15109	1.24713	0.596565	0.810157	0.706623	0.677581			588.2	0.609345	0.617358	0.458838	0.449219	0.801547	0.722853	0.546054	0.527859					588.2	0.804391	0.743759
588.4	0.715916	0.72217	0.727002	0.585532	0.580359	0.589159	1.71838	1.52331	1.84741	0.635745	0.531715	0.562964			588.4	0.802496	0.900556	0.874883	0.969416	0.7254	0.729947	0.721746	0.727689	0.831674	1.23418	1.14817	1.24584	0.594354	0.807404	0.703906	0.67501			588.4	0.605176	0.613405	0.455476	0.446369	0.79834	0.720731	0.542967	0.525973					588.4	0.799864	0.740011
588.6	0.713818	0.720247	0.725024	0.583657	0.57856	0.587625	1.71906	1.52366	1.8491	0.634064	0.529858	0.561619			588.6	0.801005	0.898784	0.872971	0.967411	0.723679	0.728058	0.720052	0.72615	0.830263	1.23287	1.14717	1.24421	0.593456	0.80569	0.702562	0.673494			588.6	0.603265	0.611395	0.454066	0.444944	0.796645	0.719486	0.541194	0.524819					588.6	0.797517	0.738466
588.8	0.709701	0.715993	0.720907	0.580563	0.575149	0.584307	1.7199	1.52362	1.85017	0.629846	0.526764	0.557031			588.8	0.797385	0.895	0.869072	0.962735	0.720042	0.724909	0.716888	0.722883	0.827605	1.22992	1.14566	1.24152	0.589001	0.802289	0.699437	0.669959			588.8	0.599277	0.607285	0.451085	0.442097	0.793849	0.716764	0.537827	0.521881					588.8	0.793123	0.734239
589	0.706366	0.71246	0.717073	0.577917	0.572566	0.581528	1.71911	1.52395	1.85064	0.626677	0.524113	0.555395			589	0.794396	0.89204	0.865953	0.959195	0.716936	0.722197	0.714133	0.720074	0.824331	1.2279	1.14402	1.23941	0.585798	0.800415	0.697364	0.668328			589	0.596206	0.603829	0.448623	0.439636	0.791206	0.714773	0.534695	0.520121					589	0.78951	0.730954
589.2	0.703849	0.709599	0.714476	0.575931	0.570519	0.57935	1.71823	1.52401	1.85175	0.624079	0.522172	0.553681			589.2	0.792117	0.889496	0.863242	0.956547	0.714492	0.720116	0.711923	0.718012	0.82201	1.22591	1.14249	1.2375	0.583538	0.798914	0.696043	0.666745			589.2	0.593547	0.601036	0.446723	0.437705	0.788713	0.713224	0.532503	0.518658					589.2	0.78696	0.728501
589.4	0.700527	0.706169	0.710975	0.573425	0.567886	0.576488	1.71822	1.52289	1.85225	0.621348	0.519309	0.551782			589.4	0.789086	0.885849	0.859734	0.952862	0.71195	0.717169	0.708752	0.71534	0.820576	1.22381	1.13966	1.23566	0.581206	0.795991	0.693374	0.66425			589.4	0.590229	0.597867	0.444276	0.435299	0.785842	0.710602	0.529226	0.516483					589.4	0.783258	0.725042
589.6	0.69791	0.703485	0.708223	0.571226	0.565696	0.574298	1.71763	1.52065	1.85219	0.619324	0.516908	0.550409			589.6	0.786487	0.883004	0.85691	0.950114	0.709784	0.714951	0.706416	0.713303	0.819016	1.2221	1.13797	1.23402	0.579613	0.793404	0.690852	0.662168			589.6	0.58764	0.595304	0.442309	0.433374	0.783404	0.708365	0.526653	0.514822					589.6	0.780271	0.722505
589.8	0.693654	0.69948	0.704099	0.567944	0.562631	0.570765	1.71466	1.5208	1.85052	0.617195	0.514275	0.549669			589.8	0.782884	0.879232	0.853007	0.945735	0.706351	0.711609	0.7031	0.710169	0.817323	1.219	1.13535	1.23106	0.577843	0.790824	0.688271	0.658858			589.8	0.583608	0.591551	0.439439	0.430653	0.780479	0.705281	0.523152	0.512262					589.8	0.775741	0.718425
590	0.691471	0.697351	0.701922	0.566359	0.561252	0.569452	1.71355	1.51875	1.85054	0.616499	0.512924	0.548524			590	0.781208	0.877321	0.851007	0.943561	0.704628	0.709836	0.701214	0.708855	0.816353	1.2174	1.13366	1.22964	0.577198	0.789011	0.686792	0.657549			590	0.581629	0.589486	0.437997	0.429372	0.77858	0.703958	0.521288	0.511083					590	0.773626	0.716453
590.2	0.687704	0.692924	0.697318	0.562894	0.558351	0.566395	1.71152	1.5165	1.85029	0.614066	0.508889	0.544477			590.2	0.777524	0.873605	0.847429	0.939507	0.700924	0.706935	0.698077	0.705737	0.812963	1.21452	1.13129	1.22704	0.574579	0.785144	0.682755	0.655328			590.2	0.57763	0.585375	0.435004	0.426537	0.775331	0.701322	0.517128	0.508223					590.2	0.769159	0.712669
590.4	0.684148	0.689456	0.693918	0.560223	0.555353	0.563564	1.71002	1.51363	1.84836	0.611351	0.506238	0.542713			590.4	0.774634	0.870333	0.84393	0.935664	0.698085	0.704456	0.695262	0.703109	0.810901	1.21135	1.12885	1.22444	0.571338	0.782174	0.680011	0.653083			590.4	0.574502	0.581981	0.432471	0.424199	0.772116	0.698767	0.514127	0.505756					590.4	0.765716	0.709161
590.6	0.681393	0.686898	0.690825	0.557946	0.553208	0.561539	1.70824	1.51109	1.84658	0.608935	0.504502	0.541674			590.6	0.772488	0.867461	0.841161	0.932888	0.695897	0.702342	0.692902	0.70106	0.809109	1.20871	1.12644	1.22212	0.569105	0.779621	0.677902	0.651754			590.6	0.572038	0.579293	0.430488	0.422309	0.769724	0.696841	0.511803	0.504162					590.6	0.762828	0.706212
590.8	0.678169	0.683487	0.687616	0.555642	0.55078	0.558647	1.70582	1.50857	1.84477	0.60736	0.502433	0.538808			590.8	0.769736	0.864474	0.837903	0.929313	0.693048	0.699852	0.690227	0.698082	0.806645	1.20501	1.12333	1.22039	0.568085	0.77715	0.675598	0.649648			590.8	0.568925	0.576034	0.427983	0.420011	0.766574	0.69475	0.508949	0.501621					590.8	0.759167	0.702601
591	0.675587	0.680694	0.684962	0.553712	0.548976	0.556406	1.70395	1.50618	1.84284	0.606005	0.500576	0.536731			591	0.767299	0.861899	0.835309	0.926392	0.690959	0.697631	0.688127	0.695713	0.804368	1.20167	1.12048	1.21848	0.566243	0.775115	0.673829	0.648056			591	0.566374	0.573404	0.425855	0.418134	0.763659	0.692842	0.506716	0.499496					591	0.756127	0.699819
591.2	0.671686	0.676965	0.680714	0.550819	0.545646	0.553177	1.7022	1.5026	1.83816	0.604097	0.498206	0.533288			591.2	0.76374	0.858118	0.831775	0.921665	0.687313	0.694341	0.684807	0.692442	0.800641	1.19752	1.11664	1.21275	0.563741	0.772079	0.672029	0.644592			591.2	0.562407	0.569695	0.422942	0.415425	0.760348	0.689315	0.503397	0.496744					591.2	0.751123	0.69565
591.4	0.668703	0.673658	0.677168	0.548309	0.542862	0.55021	1.69929	1.49799	1.83431	0.60104	0.495939	0.529973			591.4	0.760903	0.854811	0.828867	0.91795	0.684479	0.691462	0.682178	0.689351	0.798237	1.19417	1.11316	1.20874	0.561486	0.768299	0.66842	0.642036			591.4	0.559125	0.566509	0.42056	0.412999	0.756754	0.686741	0.499947	0.494489					591.4	0.747214	0.692477
591.6	0.666045	0.670571	0.674402	0.546389	0.540704	0.547941	1.69616	1.49629	1.8315	0.598005	0.493121	0.527256			591.6	0.75854	0.852054	0.826416	0.915072	0.682097	0.689293	0.67978	0.68732	0.795768	1.1918	1.11102	1.20635	0.559143	0.765233	0.665228	0.639594			591.6	0.556652	0.563854	0.418717	0.411255	0.754096	0.684797	0.497262	0.492616					591.6	0.744076	0.689795
591.8	0.662832	0.66744	0.670918	0.543493	0.538085	0.545299	1.69251	1.49081	1.82788	0.595909	0.489189	0.524952			591.8	0.755419	0.848532	0.823165	0.911759	0.679496	0.686567	0.677136	0.684631	0.793336	1.18834	1.10764	1.20316	0.557467	0.76228	0.662972	0.637229			591.8	0.553612	0.56064	0.416323	0.408824	0.750492	0.682054	0.494036	0.490549					591.8	0.740785	0.686476
592	0.660116	0.664689	0.667942	0.54131	0.535968	0.543217	1.69032	1.48636	1.82469	0.594262	0.486518	0.523813			592	0.753052	0.845632	0.820665	0.909118	0.677512	0.684347	0.674878	0.682505	0.7915	1.18494	1.10432	1.20049	0.556105	0.76011	0.661564	0.636231			592	0.551099	0.557889	0.414326	0.406947	0.747789	0.679682	0.491591	0.489118					592	0.73775	0.683679
592.2	0.656829	0.661407	0.664614	0.538736	0.533379	0.540322	1.68526	1.48211	1.82087	0.592498	0.48388	0.521096			592.2	0.750194	0.842299	0.81755	0.905661	0.675055	0.681311	0.672019	0.679482	0.788755	1.18134	1.10094	1.19689	0.555212	0.757335	0.659145	0.632921			592.2	0.547848	0.554676	0.412101	0.404559	0.744743	0.676883	0.488623	0.486894					592.2	0.73375	0.680561
592.4	0.654164	0.658694	0.661959	0.536685	0.531311	0.538016	1.68095	1.47831	1.81691	0.590441	0.481869	0.518642			592.4	0.747911	0.839473	0.814855	0.902991	0.673076	0.679135	0.669654	0.677125	0.786473	1.17784	1.09777	1.19374	0.554038	0.754334	0.657524	0.630048			592.4	0.545082	0.551973	0.410256	0.402638	0.742142	0.674463	0.486527	0.484874					592.4	0.730732	0.677657
592.6	0.650317	0.654776	0.658336	0.533424	0.528301	0.534723	1.67519	1.47381	1.81038	0.586516	0.478481	0.51478			592.6	0.744616	0.835464	0.811045	0.898377	0.669996	0.675704	0.666411	0.673658	0.783121	1.17401	1.09394	1.18916	0.549655	0.749663	0.653685	0.626378			592.6	0.541393	0.548095	0.407491	0.399658	0.738618	0.671485	0.482546	0.481986					592.6	0.726363	0.673815
592.8	0.647198	0.651278	0.655376	0.530872	0.525785	0.531683	1.67111	1.46953	1.80394	0.584575	0.476329	0.512127			592.8	0.741793	0.83211	0.807864	0.894853	0.667076	0.673033	0.663702	0.670823	0.781456	1.16949	1.08966	1.18468	0.54638	0.746757	0.650981	0.623596			592.8	0.538316	0.544915	0.405207	0.397445	0.735057	0.668653	0.479608	0.47973					592.8	0.722941	0.670405
593	0.644338	0.648609	0.652755	0.528921	0.523863	0.529714	1.66763	1.46536	1.79961	0.582706	0.47483	0.509139			593	0.739492	0.829367	0.805264	0.891991	0.664993	0.670801	0.661508	0.668433	0.779548	1.16637	1.08659	1.18115	0.544373	0.744374	0.649069	0.621716			593	0.535996	0.542419	0.403433	0.395606	0.732152	0.666194	0.477416	0.477647					593	0.719892	0.667862
593.2	0.641348	0.645115	0.649515	0.526436	0.521287	0.52697	1.66392	1.46044	1.7941	0.58008	0.471846	0.506763			593.2	0.736312	0.826046	0.801923	0.888504	0.662057	0.667996	0.658606	0.665478	0.776483	1.16211	1.08263	1.17754	0.54208	0.741147	0.645937	0.619543			593.2	0.533001	0.539089	0.401051	0.393206	0.72856	0.663163	0.475057	0.475358					593.2	0.716592	0.66462
593.4	0.638733	0.642436	0.647075	0.524575	0.519108	0.524616	1.66006	1.45697	1.78999	0.576663	0.469553	0.505327			593.4	0.73376	0.82344	0.799206	0.885705	0.659881	0.665846	0.656364	0.663022	0.773853	1.1591	1.07962	1.17494	0.539726	0.738976	0.643807	0.617916			593.4	0.530598	0.536483	0.399212	0.391258	0.725713	0.660692	0.473001	0.473518					593.4	0.713605	0.661702
593.6	0.634744	0.638284	0.643158	0.52143	0.515997	0.52141	1.65349	1.45098	1.78143	0.572959	0.467651	0.502745			593.6	0.730449	0.819637	0.795295	0.88207	0.656757	0.662147	0.652996	0.659624	0.76995	1.15436	1.07416	1.16981	0.536776	0.735945	0.641321	0.614132			593.6	0.526862	0.532569	0.396331	0.388484	0.722061	0.657267	0.469763	0.470929					593.6	0.709109	0.65747
593.8	0.632957	0.636142	0.641132	0.519965	0.514654	0.51984	1.65031	1.44867	1.77667	0.571654	0.465934	0.501777			593.8	0.728618	0.817778	0.79339	0.880052	0.655066	0.660361	0.651562	0.658038	0.768158	1.15229	1.07209	1.16688	0.535332	0.734218	0.639394	0.612875			593.8	0.525006	0.530803	0.395165	0.387056	0.72022	0.655202	0.46831	0.469175					593.8	0.707054	0.655917
594	0.628833	0.631916	0.637376	0.516868	0.511336	0.516569	1.64336	1.44301	1.76667	0.567347	0.463443	0.499003			594	0.725012	0.813769	0.789123	0.875885	0.651761	0.657226	0.648173	0.654528	0.765391	1.14849	1.06759	1.16028	0.531385	0.730547	0.636222	0.611095			594	0.521198	0.526956	0.392342	0.384283	0.716219	0.650987	0.4649	0.466744					594	0.702756	0.652186
594.2	0.625371	0.628861	0.633806	0.51376	0.508613	0.514181	1.63692	1.43807	1.75944	0.564301	0.460971	0.496684			594.2	0.722398	0.810498	0.785936	0.872136	0.648796	0.654531	0.64541	0.651895	0.762932	1.14431	1.06362	1.15446	0.529824	0.727142	0.633224	0.608457			594.2	0.517861	0.523779	0.390158	0.382012	0.71267	0.647347	0.462021	0.46434					594.2	0.699538	0.648954
594.4	0.622694	0.626215	0.630723	0.511303	0.506445	0.512177	1.63123	1.43351	1.75416	0.561636	0.459421	0.495048			594.4	0.720402	0.807766	0.783353	0.869135	0.646847	0.652463	0.643378	0.649841	0.760561	1.14126	1.06021	1.15108	0.52908	0.724411	0.631083	0.606082			594.4	0.515315	0.521336	0.388462	0.380079	0.709871	0.644867	0.459884	0.462409					594.4	0.696921	0.646381
594.6	0.619288	0.622959	0.627568	0.508906	0.50369	0.509609	1.62377	1.42818	1.74659	0.558893	0.457096	0.492253			594.6	0.717116	0.80448	0.779676	0.86585	0.644135	0.649587	0.640574	0.647291	0.757474	1.13651	1.05607	1.14675	0.526902	0.722066	0.628497	0.603468			594.6	0.512464	0.518068	0.386107	0.37771	0.706661	0.641696	0.457121	0.459791					594.6	0.693367	0.643393
594.8	0.616597	0.620324	0.625349	0.506785	0.50157	0.507431	1.61845	1.42376	1.74131	0.556615	0.454867	0.490169			594.8	0.714554	0.801804	0.776661	0.863076	0.64201	0.64749	0.638341	0.645425	0.754811	1.13332	1.05334	1.1435	0.525243	0.720083	0.627034	0.601444			594.8	0.51017	0.515552	0.384243	0.375792	0.704309	0.639113	0.455072	0.457857					594.8	0.690294	0.640737
595	0.612708	0.616405	0.620917	0.503398	0.498388	0.504107	1.61003	1.41549	1.73426	0.55311	0.452523	0.488092			595	0.711282	0.797825	0.772374	0.859018	0.638441	0.643977	0.634868	0.642452	0.750726	1.12709	1.04889	1.13786	0.521935	0.716334	0.62408	0.598916			595	0.506397	0.51187	0.381642	0.373023	0.700637	0.635054	0.45166	0.454841					595	0.685746	0.636885
595.2	0.610586	0.614127	0.618903	0.5019	0.496803	0.502578	1.60543	1.41208	1.73057	0.551131	0.451415	0.485794			595.2	0.709276	0.796025	0.770409	0.856856	0.636661	0.642247	0.633104	0.640793	0.748047	1.12519	1.04628	1.13528	0.519769	0.714351	0.622811	0.597261			595.2	0.504584	0.510041	0.380288	0.371573	0.698712	0.633338	0.450316	0.453107					595.2	0.683628	0.634801
595.4	0.606976	0.610003	0.615107	0.499369	0.493843	0.49931	1.59567	1.40446	1.72017	0.547371	0.44772	0.483425			595.4	0.705622	0.791855	0.766412	0.852428	0.633459	0.638983	0.629827	0.63731	0.743802	1.1185	1.04002	1.12922	0.516262	0.709888	0.618485	0.595452			595.4	0.500841	0.506439	0.37764	0.368812	0.693428	0.629477	0.446969	0.450105					595.4	0.679995	0.630958
595.6	0.603599	0.606664	0.611776	0.496603	0.491155	0.496781	1.58916	1.39774	1.71218	0.54454	0.445625	0.48058			595.6	0.702657	0.788348	0.763056	0.848623	0.630652	0.636191	0.627126	0.634435	0.741244	1.11424	1.03521	1.12485	0.514145	0.707122	0.615483	0.59338			595.6	0.497973	0.503459	0.375326	0.366494	0.689455	0.626343	0.444256	0.447474					595.6	0.676392	0.627696
595.8	0.600964	0.604193	0.60876	0.494383	0.488919	0.494834	1.58363	1.39197	1.70523	0.543075	0.443461	0.478795			595.8	0.700371	0.785778	0.760277	0.845622	0.628555	0.633907	0.624933	0.632179	0.738807	1.11035	1.03137	1.12147	0.512679	0.704995	0.613342	0.591931			595.8	0.495644	0.501066	0.373515	0.364732	0.686239	0.623791	0.442266	0.445508					595.8	0.673586	0.625376
596	0.59754	0.600761	0.605267	0.492092	0.486305	0.492265	1.57553	1.38484	1.69664	0.541295	0.441424	0.476974			596	0.697476	0.782459	0.756644	0.842307	0.625803	0.631424	0.622217	0.629699	0.735146	1.10553	1.02685	1.11708	0.511295	0.702499	0.611506	0.590219			596	0.492661	0.497988	0.371368	0.362526	0.682352	0.620036	0.440079	0.44336					596	0.669855	0.622285
596.2	0.594778	0.59814	0.602563	0.490072	0.484121	0.490189	1.56881	1.38054	1.69063	0.538796	0.438581	0.475281			596.2	0.694865	0.77968	0.75396	0.839411	0.623846	0.629353	0.620167	0.627509	0.732031	1.10246	1.02334	1.11362	0.509785	0.699876	0.60965	0.589135			596.2	0.490146	0.495504	0.36958	0.360701	0.679435	0.61735	0.438182	0.441584					596.2	0.667123	0.619749
596.4	0.590859	0.594629	0.598548	0.487219	0.48096	0.486889	1.55914	1.37351	1.68222	0.533134	0.435987	0.47309			596.4	0.691304	0.775652	0.750244	0.834747	0.620608	0.625858	0.616913	0.623952	0.727775	1.09722	1.01858	1.1086	0.506113	0.696423	0.606398	0.586156			596.4	0.486563	0.49172	0.366853	0.357918	0.674605	0.613567	0.434939	0.438368					596.4	0.663013	0.615976
596.6	0.587504	0.591542	0.5951	0.484711	0.478372	0.484225	1.55196	1.36591	1.67343	0.530536	0.433732	0.46947			596.6	0.68845	0.77228	0.747177	0.830966	0.617971	0.622986	0.614362	0.62122	0.72471	1.092	1.01379	1.10311	0.504123	0.693417	0.603611	0.582692			596.6	0.483507	0.48881	0.364773	0.355784	0.670258	0.610291	0.432034	0.435286					596.6	0.659144	0.612823
596.8	0.585062	0.589176	0.592432	0.482738	0.476222	0.482126	1.54555	1.35934	1.66681	0.529247	0.432547	0.46693			596.8	0.685789	0.769498	0.744697	0.827895	0.615618	0.620767	0.612236	0.618916	0.722213	1.08764	1.01012	1.09814	0.502871	0.690516	0.601168	0.580644			596.8	0.481073	0.486563	0.363088	0.354056	0.666873	0.607318	0.429862	0.433083					596.8	0.65636	0.610402
597	0.581845	0.585901	0.58931	0.480215	0.473961	0.479833	1.53671	1.35254	1.65845	0.527135	0.429416	0.463189			597	0.682559	0.765902	0.741259	0.823987	0.612741	0.617912	0.609549	0.615978	0.718298	1.08224	1.00563	1.09321	0.501487	0.687633	0.59911	0.577958			597	0.478158	0.483666	0.361074	0.351986	0.663052	0.604104	0.427464	0.430462					597	0.652754	0.607121
597.2	0.579127	0.583622	0.586734	0.478158	0.472115	0.477956	1.52956	1.34586	1.65153	0.525444	0.427514	0.460557			597.2	0.680174	0.76322	0.738746	0.82117	0.610439	0.615744	0.607199	0.61368	0.71552	1.07756	1.00194	1.08916	0.500065	0.68565	0.597302	0.575415			597.2	0.475792	0.481372	0.359299	0.350289	0.659887	0.601503	0.425441	0.428495					597.2	0.649966	0.604566
597.4	0.575494	0.57998	0.583064	0.475511	0.469047	0.474739	1.51897	1.33681	1.64089	0.522242	0.424734	0.457676			597.4	0.676512	0.759099	0.734858	0.816832	0.607042	0.612046	0.60386	0.610338	0.711159	1.07181	0.995947	1.08333	0.497513	0.68254	0.593269	0.570858			597.4	0.472419	0.477873	0.356823	0.347661	0.655573	0.597837	0.422281	0.425265					597.4	0.645648	0.600824
597.6	0.573624	0.578136	0.581206	0.474185	0.46769	0.473056	1.51367	1.33116	1.63488	0.520805	0.423363	0.455471			597.6	0.674637	0.757314	0.733041	0.814822	0.605275	0.610221	0.602133	0.608539	0.708728	1.06813	0.992878	1.07988	0.495203	0.680883	0.591322	0.569798			597.6	0.470701	0.476191	0.355531	0.346387	0.653039	0.595589	0.420799	0.423671					597.6	0.643545	0.59862
597.8	0.569705	0.574408	0.577392	0.471469	0.465031	0.469888	1.50412	1.32167	1.6251	0.517156	0.420622	0.451943			597.8	0.670956	0.75316	0.729385	0.811003	0.601922	0.60684	0.598753	0.605253	0.704984	1.06262	0.987461	1.07351	0.49195	0.676716	0.588237	0.566781			597.8	0.467288	0.472707	0.352987	0.343879	0.647826	0.591058	0.417636	0.420505					597.8	0.639446	0.594934
598	0.566423	0.571268	0.57385	0.469205	0.462441	0.467546	1.49602	1.31337	1.61589	0.514037	0.418028	0.449752			598	0.668174	0.749827	0.726524	0.807061	0.599353	0.603803	0.595821	0.602452	0.701831	1.05672	0.982382	1.06775	0.489822	0.673224	0.585342	0.564536			598	0.464291	0.469757	0.350862	0.341858	0.643731	0.587436	0.41534	0.417689					598	0.636195	0.591778
598.2	0.56391	0.568846	0.571342	0.467379	0.460591	0.465644	1.48911	1.30761	1.60839	0.512898	0.416171	0.44818			598.2	0.66586	0.747301	0.723999	0.804052	0.597238	0.601567	0.59366	0.600211	0.699251	1.05208	0.978377	1.0634	0.489039	0.670588	0.583268	0.562545			598.2	0.461945	0.467446	0.349212	0.340228	0.640609	0.584492	0.413416	0.415489					598.2	0.633723	0.589017
598.4	0.560962	0.56578	0.568133	0.464925	0.458112	0.46334	1.48018	1.29978	1.5976	0.509941	0.41466	0.446324			598.4	0.66291	0.743901	0.720848	0.800293	0.594664	0.599086	0.590815	0.597493	0.696638	1.04686	0.97294	1.0583	0.486828	0.668031	0.580219	0.560103			598.4	0.459339	0.464443	0.346943	0.338194	0.636333	0.580737	0.410367	0.412849					598.4	0.630619	0.585883
598.6	0.558515	0.563476	0.56554	0.462717	0.456226	0.461424	1.47302	1.293	1.58983	0.507381	0.41261	0.444631			598.6	0.66058	0.741081	0.718161	0.797439	0.592429	0.596836	0.588585	0.595405	0.694636	1.04234	0.968364	1.05423	0.484695	0.665786	0.577764	0.557278			598.6	0.457219	0.462195	0.345179	0.336577	0.632986	0.577684	0.408048	0.410685					598.6	0.62793	0.583368
598.8	0.554635	0.560298	0.561651	0.459609	0.453077	0.458589	1.46185	1.28229	1.5774	0.503665	0.411547	0.440953			598.8	0.657119	0.737266	0.714283	0.793238	0.58928	0.593674	0.585215	0.592609	0.689956	1.03605	0.963023	1.04745	0.480775	0.663181	0.574612	0.55346			598.8	0.453948	0.458862	0.342544	0.334115	0.62866	0.573132	0.405775	0.40765					598.8	0.623951	0.579259
599	0.552688	0.558333	0.559908	0.458342	0.451566	0.457105	1.45653	1.27701	1.57095	0.501465	0.410868	0.439211			599	0.654919	0.735188	0.71238	0.791197	0.587395	0.592041	0.583785	0.591061	0.687773	1.03292	0.959755	1.04332	0.479325	0.661676	0.572982	0.551833			599	0.452193	0.457169	0.341134	0.332921	0.62597	0.57046	0.404466	0.406035					599	0.62219	0.577509
599.2	0.549381	0.554754	0.556444	0.455254	0.448278	0.454179	1.44625	1.26814	1.55928	0.497495	0.408748	0.436508			599.2	0.651125	0.731091	0.70874	0.787108	0.583938	0.588596	0.58018	0.587744	0.682767	1.02802	0.953791	1.03624	0.475609	0.658053	0.569382	0.548092			599.2	0.448795	0.453768	0.338767	0.330398	0.621792	0.56639	0.401564	0.402534					599.2	0.618424	0.573179
599.4	0.546338	0.551833	0.553204	0.452788	0.445926	0.451802	1.43641	1.25804	1.54756	0.495162	0.40709	0.434281			599.4	0.648305	0.728165	0.705561	0.783474	0.580758	0.585859	0.577487	0.585114	0.678224	1.02187	0.948287	1.03053	0.473856	0.655087	0.566546	0.544955			599.4	0.445982	0.451027	0.33671	0.328335	0.617854	0.562629	0.399266	0.399662					599.4	0.614962	0.569936
599.6	0.543984	0.549503	0.550655	0.450861	0.444065	0.449943	1.42871	1.2509	1.5386	0.492652	0.406353	0.431479			599.6	0.645947	0.72554	0.703112	0.78092	0.578295	0.583779	0.575305	0.582981	0.675352	1.01742	0.943783	1.02504	0.472064	0.652769	0.564595	0.542191			599.6	0.44388	0.448818	0.335063	0.3267	0.614843	0.559541	0.397349	0.39713					599.6	0.612032	0.567462
599.8	0.540508	0.545904	0.546777	0.447846	0.441234	0.447136	1.4168	1.24051	1.52562	0.490407	0.404265	0.429238			599.8	0.642305	0.721615	0.698855	0.776778	0.57508	0.580324	0.572048	0.579877	0.670886	1.00968	0.93703	1.0172	0.469512	0.649837	0.561994	0.539659			599.8	0.440642	0.445552	0.332491	0.324152	0.60994	0.554799	0.394959	0.394419					599.8	0.607956	0.563474
600	0.53853	0.544184	0.545048	0.445924	0.439623	0.445685	1.41103	1.23473	1.51865	0.48803	0.402824	0.428697			600	0.640476	0.719689	0.696723	0.774645	0.573549	0.578657	0.57033	0.578207	0.669365	1.00621	0.934068	1.01418	0.468376	0.64798	0.560658	0.538426			600	0.439077	0.443934	0.331181	0.322859	0.607266	0.553107	0.393817	0.39286					600	0.606149	0.561947
600.2	0.534957	0.540546	0.541386	0.442752	0.436974	0.44285	1.39917	1.22418	1.50526	0.484143	0.4013	0.426756			600.2	0.637393	0.715598	0.692953	0.770393	0.570539	0.575547	0.566844	0.575141	0.665302	0.999947	0.928441	1.00846	0.465151	0.644862	0.556998	0.535629			600.2	0.43562	0.440667	0.328532	0.320363	0.602795	0.548521	0.391408	0.389696					600.2	0.602432	0.558727
600.4	0.532063	0.537598	0.538296	0.44032	0.434553	0.440411	1.39009	1.21638	1.49487	0.481019	0.399443	0.424792			600.4	0.634282	0.712184	0.689944	0.766928	0.568163	0.572691	0.56428	0.572429	0.66195	0.994672	0.923508	1.00394	0.462918	0.640843	0.554845	0.533864			600.4	0.432978	0.437842	0.326565	0.318262	0.598741	0.544943	0.389061	0.387299					600.4	0.599316	0.555588
600.6	0.529748	0.535284	0.535898	0.438365	0.432605	0.438505	1.38266	1.20981	1.48635	0.478525	0.397278	0.422566			600.6	0.631802	0.709435	0.687497	0.764084	0.566051	0.570372	0.562201	0.570326	0.659055	0.991014	0.919634	1.00038	0.460911	0.637925	0.552707	0.532027			600.6	0.430869	0.43568	0.324965	0.316612	0.595604	0.542175	0.386869	0.385247					600.6	0.596652	0.553228
600.8	0.526725	0.532074	0.532463	0.435955	0.430287	0.436228	1.37209	1.2007	1.4757	0.475208	0.395683	0.419785			600.8	0.628766	0.705982	0.683992	0.760602	0.563528	0.567597	0.559425	0.567521	0.655345	0.985382	0.913626	0.99526	0.458662	0.634932	0.550304	0.529647			600.8	0.428262	0.432871	0.322788	0.314558	0.591436	0.538473	0.384416	0.382728					600.8	0.593351	0.550562
601	0.524381	0.529885	0.529904	0.434065	0.428203	0.434394	1.36412	1.19429	1.46747	0.47235	0.394678	0.417288			601	0.626367	0.703306	0.681211	0.757719	0.561292	0.565419	0.557388	0.565283	0.652098	0.980984	0.909229	0.990957	0.456755	0.632836	0.548389	0.527772			601	0.426198	0.430604	0.321099	0.313006	0.588599	0.535648	0.382714	0.38061					601	0.590697	0.548441
601.2	0.520914	0.526378	0.526505	0.43096	0.425595	0.431714	1.35149	1.18339	1.45353	0.469862	0.391559	0.413717			601.2	0.622735	0.699326	0.676881	0.753096	0.558006	0.562248	0.55429	0.561926	0.646182	0.973912	0.903213	0.984505	0.454103	0.629326	0.545153	0.524841			601.2	0.423179	0.427407	0.318739	0.310668	0.583472	0.530896	0.379804	0.377498					601.2	0.587083	0.544875
601.4	0.519229	0.52455	0.524594	0.429529	0.424	0.430105	1.34543	1.17799	1.44721	0.467755	0.390521	0.411882			601.4	0.620996	0.697415	0.674956	0.751094	0.556351	0.560537	0.552639	0.560092	0.643779	0.971164	0.899914	0.980994	0.452587	0.627739	0.543151	0.523498			601.4	0.421645	0.42581	0.317538	0.309595	0.58087	0.528735	0.378458	0.376038					601.4	0.585112	0.543296
601.6	0.515471	0.520741	0.521229	0.42676	0.421342	0.427378	1.33255	1.16709	1.43392	0.464382	0.38785	0.408468			601.6	0.617497	0.69326	0.671005	0.746959	0.552889	0.557365	0.549612	0.557022	0.638045	0.965692	0.89353	0.974086	0.449119	0.624281	0.540704	0.519857			601.6	0.418482	0.422605	0.315274	0.307184	0.576351	0.524629	0.376536	0.372769					601.6	0.581358	0.53959
601.8	0.512451	0.517683	0.518244	0.424492	0.419133	0.424983	1.32252	1.15876	1.42207	0.462387	0.385622	0.404961			601.8	0.614603	0.690009	0.667676	0.743466	0.550093	0.554859	0.546895	0.554169	0.634848	0.961182	0.88939	0.967711	0.447807	0.620488	0.537774	0.517127			601.8	0.415775	0.419911	0.313334	0.305229	0.572894	0.521096	0.374176	0.370135					601.8	0.578301	0.536724
602	0.510198	0.515515	0.515684	0.422584	0.417381	0.423308	1.31511	1.15234	1.41259	0.460656	0.384206	0.402706			602	0.612463	0.687472	0.665046	0.740494	0.54775	0.552679	0.544722	0.551918	0.632461	0.957346	0.885956	0.963192	0.446853	0.617448	0.535482	0.515151			602	0.41359	0.417774	0.311745	0.303658	0.570163	0.518338	0.372295	0.367934					602	0.575858	0.534454
602.2	0.506761	0.512004	0.512289	0.419645	0.41447	0.420137	1.30193	1.14209	1.40088	0.458135	0.380709	0.400238			602.2	0.609223	0.683537	0.661382	0.736297	0.544703	0.549347	0.5412	0.548875	0.628419	0.950796	0.879976	0.957163	0.44472	0.613969	0.532532	0.512613			602.2	0.41066	0.41467	0.309693	0.301271	0.565354	0.514061	0.369319	0.364799					602.2	0.572126	0.53119
602.4	0.505114	0.510437	0.510562	0.418222	0.413177	0.418739	1.29498	1.13577	1.39462	0.457228	0.379416	0.399278			602.4	0.607363	0.681797	0.659491	0.733878	0.543245	0.547735	0.539992	0.547247	0.626385	0.947277	0.87634	0.954097	0.444031	0.612647	0.531104	0.512038			602.4	0.409168	0.413162	0.308394	0.300245	0.562618	0.511869	0.368079	0.363229					602.4	0.570197	0.529796
602.6	0.501567	0.506806	0.507252	0.415154	0.410782	0.415904	1.28287	1.12567	1.38148	0.455011	0.377853	0.3974			602.6	0.603881	0.677544	0.655867	0.729634	0.540312	0.544513	0.536738	0.544127	0.622019	0.940466	0.870122	0.946432	0.441936	0.609537	0.528546	0.509414			602.6	0.406096	0.410183	0.305995	0.298202	0.557471	0.507671	0.3653	0.36022					602.6	0.566192	0.526398
602.8	0.498893	0.503529	0.504316	0.412626	0.408335	0.413766	1.2734	1.11645	1.37086	0.451832	0.375874	0.395316			602.8	0.601191	0.674089	0.652587	0.726114	0.537615	0.541878	0.534331	0.541788	0.61881	0.935452	0.864571	0.940829	0.438854	0.606849	0.52585	0.507169			602.8	0.403648	0.40757	0.304186	0.296333	0.553742	0.504162	0.363083	0.357879					602.8	0.563255	0.52348
603	0.496751	0.500723	0.501886	0.410851	0.406392	0.412073	1.26505	1.1094	1.36167	0.449134	0.37378	0.394192			603	0.599085	0.67145	0.650161	0.723353	0.535643	0.539797	0.532144	0.539716	0.615982	0.931407	0.860177	0.936665	0.436467	0.604605	0.523518	0.505605			603	0.401573	0.405413	0.302726	0.294848	0.550878	0.501373	0.361138	0.356088					603	0.561021	0.520996
603.2	0.493867	0.497777	0.499058	0.408588	0.404295	0.409802	1.2551	1.10136	1.35123	0.447254	0.371256	0.39129			603.2	0.596231	0.668225	0.646971	0.719978	0.532949	0.537212	0.529593	0.537228	0.612983	0.925774	0.855213	0.931657	0.434013	0.601295	0.520477	0.502933			603.2	0.399099	0.402807	0.300913	0.29293	0.547188	0.497897	0.358534	0.353455					603.2	0.558059	0.518277
603.4	0.491649	0.495442	0.496697	0.406912	0.402605	0.408016	1.24736	1.09529	1.34228	0.445711	0.369502	0.388843			603.4	0.593917	0.665532	0.644484	0.717259	0.530834	0.534914	0.527529	0.535278	0.610315	0.921295	0.850894	0.926515	0.43317	0.598529	0.517884	0.501273			603.4	0.397115	0.400751	0.299419	0.291504	0.544043	0.494838	0.356609	0.351392					603.4	0.555619	0.515852
603.6	0.488013	0.492219	0.493042	0.403953	0.399738	0.405458	1.23556	1.08402	1.32867	0.442753	0.366325	0.384774			603.6	0.590433	0.661593	0.640357	0.713046	0.527769	0.531628	0.52432	0.532553	0.606378	0.914662	0.843899	0.918849	0.430254	0.595332	0.514755	0.497776			603.6	0.394284	0.397822	0.297178	0.289451	0.538777	0.49038	0.353896	0.348304					603.6	0.551613	0.512845
603.8	0.485455	0.489009	0.490207	0.401752	0.3974	0.403194	1.22579	1.07592	1.31734	0.440299	0.363878	0.382256			603.8	0.58771	0.658443	0.637306	0.709585	0.525293	0.529143	0.521724	0.530003	0.60269	0.908973	0.838463	0.912795	0.427977	0.592692	0.512281	0.495675			603.8	0.391831	0.395426	0.295199	0.287669	0.535046	0.48666	0.351896	0.34565					603.8	0.548759	0.509906
604	0.4833	0.486778	0.488097	0.400053	0.395435	0.401204	1.21829	1.06951	1.30801	0.43822	0.361938	0.379724			604	0.585585	0.655901	0.634874	0.706927	0.523238	0.527255	0.519694	0.527921	0.600105	0.904319	0.834767	0.908344	0.425986	0.590156	0.509778	0.49355			604	0.389832	0.393566	0.293739	0.286304	0.532114	0.483696	0.350259	0.343577					604	0.546405	0.507658
604.2	0.480488	0.483933	0.485399	0.397646	0.393364	0.399068	1.20815	1.0616	1.29685	0.435898	0.359306	0.378458			604.2	0.582993	0.652797	0.632104	0.703389	0.520726	0.524886	0.516868	0.525413	0.59689	0.899074	0.829929	0.903446	0.424652	0.587147	0.506717	0.491257			604.2	0.387418	0.391209	0.292035	0.284422	0.528577	0.480376	0.347748	0.341534					604.2	0.54321	0.504583
604.4	0.478363	0.481749	0.483193	0.395889	0.391776	0.397259	1.19983	1.0558	1.28834	0.434211	0.357224	0.377469			604.4	0.580797	0.650295	0.629695	0.700669	0.518602	0.522787	0.514661	0.523308	0.59388	0.894699	0.826202	0.899753	0.423649	0.584672	0.504346	0.489367			604.4	0.385523	0.389268	0.290551	0.282882	0.525716	0.477758	0.345912	0.339631					604.4	0.540507	0.502617
604.6	0.475218	0.478465	0.480075	0.393239	0.389563	0.394757	1.18804	1.04528	1.27514	0.43096	0.35538	0.374304			604.6	0.577465	0.646459	0.6264	0.696605	0.515407	0.519781	0.511639	0.520073	0.590269	0.887575	0.819802	0.892888	0.420562	0.581419	0.501733	0.486316			604.6	0.382527	0.386185	0.288303	0.280686	0.521073	0.473459	0.343517	0.336555					604.6	0.536697	0.499344
604.8	0.473604	0.476894	0.478291	0.391861	0.388283	0.393422	1.18175	1.04041	1.26811	0.429423	0.354598	0.372746			604.8	0.575761	0.644544	0.624595	0.694475	0.514146	0.51823	0.510019	0.518501	0.588455	0.883804	0.816868	0.889314	0.41861	0.580079	0.500476	0.485323			604.8	0.381244	0.38471	0.2872	0.279671	0.518994	0.471368	0.342285	0.335053					604.8	0.534553	0.497766
605	0.470523	0.473893	0.474898	0.389195	0.385627	0.390847	1.17058	1.03052	1.25384	0.426078	0.352664	0.370548			605	0.572378	0.640594	0.621247	0.690638	0.510924	0.515071	0.50723	0.515117	0.584563	0.876714	0.810686	0.882085	0.416267	0.577787	0.498061	0.483112			605	0.378434	0.381848	0.285077	0.277519	0.514266	0.466888	0.339837	0.332023					605	0.530873	0.494736
605.2	0.46784	0.470922	0.472256	0.386926	0.383678	0.388762	1.16098	1.02268	1.24343	0.423552	0.350423	0.369225			605.2	0.569432	0.637286	0.618247	0.687386	0.508535	0.512318	0.50464	0.512488	0.58114	0.871382	0.805887	0.876492	0.41388	0.575125	0.495935	0.481495			605.2	0.376152	0.37956	0.283294	0.27578	0.510606	0.463323	0.337844	0.329894					605.2	0.527881	0.492097
605.4	0.465798	0.468649	0.470152	0.385285	0.38212	0.387181	1.1536	1.01584	1.23522	0.421412	0.348527	0.367888			605.4	0.566884	0.634728	0.615824	0.68484	0.506665	0.51014	0.502642	0.510291	0.578152	0.867024	0.801327	0.872031	0.411972	0.572859	0.493588	0.47996			605.4	0.374219	0.377749	0.281998	0.274448	0.507398	0.46066	0.336124	0.328244					605.4	0.525415	0.490076
605.6	0.462391	0.465154	0.466558	0.382874	0.379643	0.384934	1.14291	1.00592	1.22212	0.418338	0.346676	0.365085			605.6	0.563678	0.631095	0.612436	0.681158	0.503632	0.507117	0.499442	0.506989	0.572379	0.859595	0.795605	0.865536	0.409392	0.569132	0.490515	0.476128			605.6	0.371541	0.374931	0.27975	0.272234	0.503258	0.45643	0.333674	0.325381					605.6	0.521857	0.486598
605.8	0.460772	0.463588	0.464739	0.381802	0.378188	0.383855	1.13757	1.00077	1.21551	0.416558	0.344755	0.363264			605.8	0.562038	0.629479	0.610622	0.679023	0.502249	0.505619	0.498009	0.5054	0.571012	0.856081	0.792092	0.862365	0.407832	0.567118	0.488706	0.474218			605.8	0.370158	0.373456	0.278701	0.271192	0.500919	0.454385	0.332298	0.323938					605.8	0.520085	0.484987
606	0.457776	0.460702	0.461568	0.379424	0.375525	0.381323	1.12603	0.990194	1.20293	0.412571	0.341853	0.359914			606	0.558775	0.626111	0.606889	0.674743	0.499362	0.502465	0.494642	0.502009	0.567021	0.849988	0.786675	0.856081	0.405401	0.563726	0.485522	0.471475			606	0.367272	0.370587	0.276516	0.269063	0.496514	0.450544	0.329436	0.321002					606	0.516999	0.48177
606.2	0.455165	0.458116	0.458869	0.37728	0.373624	0.378903	1.1162	0.982201	1.19255	0.410481	0.340604	0.358477			606.2	0.556251	0.623092	0.603886	0.671288	0.496811	0.499845	0.492114	0.499098	0.563448	0.845104	0.782531	0.850704	0.404607	0.560673	0.483385	0.469839			606.2	0.364913	0.368386	0.274696	0.267404	0.492867	0.447136	0.327468	0.318765					606.2	0.514425	0.479334
606.4	0.452975	0.456056	0.456715	0.375719	0.371909	0.377096	1.10861	0.975675	1.1842	0.408883	0.339221	0.356663			606.4	0.554298	0.62045	0.601612	0.668665	0.494737	0.497615	0.489919	0.496978	0.559694	0.840811	0.778717	0.846266	0.403808	0.558485	0.481446	0.467949			606.4	0.363012	0.366558	0.273237	0.266082	0.489805	0.444373	0.325905	0.316855					606.4	0.511751	0.477168
606.6	0.449763	0.452975	0.453576	0.373358	0.369527	0.374477	1.09675	0.965582	1.17134	0.406252	0.336742	0.354778			606.6	0.551086	0.616948	0.598222	0.66486	0.49158	0.494657	0.487071	0.493743	0.554231	0.834635	0.773257	0.84004	0.401156	0.555666	0.47909	0.464399			606.6	0.360499	0.363815	0.271198	0.263919	0.485923	0.44034	0.323442	0.314093					606.6	0.508646	0.474171
606.8	0.447991	0.451487	0.452197	0.372304	0.368326	0.373216	1.09115	0.960817	1.16449	0.405052	0.334898	0.353057			606.8	0.549398	0.615364	0.596488	0.662477	0.489982	0.493239	0.485572	0.49207	0.552251	0.83163	0.770604	0.836768	0.400037	0.553553	0.477401	0.463018			606.8	0.359106	0.362317	0.270185	0.262809	0.483983	0.43824	0.322116	0.312505					606.8	0.506956	0.472515
607	0.444773	0.44862	0.449231	0.369893	0.365897	0.370696	1.07904	0.950589	1.15324	0.401121	0.333284	0.351208			607	0.545946	0.611706	0.593192	0.658606	0.486743	0.490341	0.482485	0.488714	0.54799	0.825514	0.764818	0.830129	0.396872	0.550943	0.474586	0.460614			607	0.356282	0.35954	0.268136	0.260795	0.479616	0.434228	0.319686	0.309605					607	0.504243	0.469526
607.2	0.442026	0.445821	0.446751	0.367817	0.36377	0.368764	1.06914	0.941123	1.1439	0.398605	0.330998	0.350077			607.2	0.542973	0.608775	0.590191	0.655051	0.484063	0.487671	0.480052	0.486276	0.543353	0.81963	0.758831	0.82445	0.395191	0.548738	0.472191	0.458523			607.2	0.354027	0.357186	0.266363	0.259154	0.475769	0.431128	0.317751	0.307441					607.2	0.501544	0.466747
607.4	0.439865	0.443566	0.444861	0.366157	0.362228	0.367028	1.06125	0.934424	1.13602	0.396421	0.330043	0.348526			607.4	0.540613	0.606338	0.587696	0.652312	0.482094	0.485515	0.478125	0.48429	0.539731	0.815228	0.754286	0.820252	0.393834	0.546742	0.470359	0.457017			607.4	0.352225	0.355329	0.264962	0.25778	0.472698	0.428652	0.316354	0.305517					607.4	0.499288	0.46495
607.6	0.437284	0.440876	0.442233	0.364008	0.360283	0.365045	1.05313	0.925118	1.12552	0.393845	0.327424	0.346357			607.6	0.537933	0.603384	0.584824	0.649398	0.479551	0.482986	0.475756	0.48198	0.537427	0.809805	0.748881	0.814496	0.391447	0.543632	0.467789	0.454575			607.6	0.349989	0.353098	0.263193	0.256107	0.468911	0.425312	0.314366	0.303269					607.6	0.496831	0.46201
607.8	0.435249	0.438789	0.440084	0.362286	0.358698	0.363461	1.04664	0.918573	1.11748	0.39181	0.3254	0.34418			607.8	0.535647	0.601134	0.582511	0.646785	0.477702	0.480955	0.473849	0.480015	0.535927	0.805412	0.744821	0.809896	0.38922	0.541035	0.465941	0.452263			607.8	0.348304	0.351352	0.261915	0.254808	0.466032	0.422597	0.313071	0.301395					607.8	0.494855	0.460012
608	0.432048	0.435617	0.437006	0.359848	0.356055	0.360826	1.03587	0.909459	1.10551	0.388697	0.322288	0.34147			608	0.532184	0.597467	0.578918	0.642586	0.474735	0.478129	0.470868	0.476884	0.531506	0.799736	0.738659	0.803314	0.387241	0.537678	0.462495	0.449274			608	0.345535	0.348644	0.259849	0.252801	0.461422	0.418434	0.310181	0.298719					608	0.491965	0.456742
608.2	0.430377	0.434096	0.435233	0.358698	0.354701	0.359534	1.03021	0.904399	1.10093	0.387509	0.321545	0.340097			608.2	0.53062	0.59574	0.577145	0.640438	0.473198	0.476634	0.469152	0.475191	0.528953	0.796474	0.73549	0.800791	0.386237	0.536195	0.461516	0.447475			608.2	0.344171	0.347181	0.258789	0.25187	0.459	0.416813	0.309032	0.297459					608.2	0.490316	0.455146
608.4	0.427385	0.430854	0.432274	0.356248	0.351994	0.356677	1.01918	0.894549	1.08852	0.384717	0.319963	0.33691			608.4	0.527279	0.592131	0.573633	0.636606	0.470048	0.473719	0.466137	0.472411	0.524582	0.790329	0.729566	0.794867	0.384523	0.53325	0.458011	0.444636			608.4	0.341568	0.34449	0.256816	0.249903	0.454706	0.413017	0.306877	0.294724					608.4	0.487113	0.451675
608.6	0.424861	0.428459	0.429801	0.354038	0.34994	0.354461	1.01012	0.886499	1.07917	0.382124	0.318496	0.33494			608.6	0.524693	0.589151	0.570792	0.633208	0.467227	0.471393	0.463771	0.470094	0.521208	0.785383	0.72455	0.789657	0.383012	0.530497	0.455794	0.441849			608.6	0.339324	0.342221	0.255154	0.248295	0.451364	0.409851	0.304862	0.292542					608.6	0.484141	0.449022
608.8	0.422757	0.426397	0.427727	0.352073	0.348366	0.352606	1.00316	0.880927	1.07147	0.380006	0.31694	0.333382			608.8	0.522533	0.586977	0.568565	0.630415	0.465245	0.46956	0.461946	0.468311	0.519068	0.781656	0.720791	0.785561	0.381822	0.528157	0.453986	0.439911			608.8	0.337536	0.340353	0.25382	0.247019	0.448699	0.407299	0.303225	0.290914					608.8	0.481846	0.446911
609	0.419631	0.423412	0.42517	0.349428	0.345956	0.349921	0.992386	0.871359	1.05949	0.376805	0.314583	0.330416			609	0.519214	0.583378	0.565066	0.626801	0.462209	0.466544	0.458973	0.465354	0.514724	0.77525	0.715009	0.779142	0.379754	0.524791	0.450512	0.437325			609	0.334749	0.337647	0.251805	0.245094	0.44485	0.403328	0.300717	0.288012					609	0.478402	0.444127
609.2	0.417835	0.421969	0.4237	0.348195	0.344941	0.348649	0.987305	0.866427	1.0542	0.375942	0.313558	0.329271			609.2	0.517266	0.581393	0.563407	0.624956	0.460673	0.465116	0.457576	0.463833	0.512773	0.771748	0.712135	0.775727	0.378233	0.523155	0.449093	0.436049			609.2	0.333526	0.336321	0.250829	0.244052	0.442567	0.401579	0.299636	0.28675					609.2	0.476685	0.442641
609.4	0.414902	0.418963	0.420799	0.345697	0.342407	0.346129	0.97696	0.857615	1.04283	0.373841	0.311124	0.326035			609.4	0.513857	0.577672	0.559994	0.621226	0.457825	0.461995	0.454822	0.46122	0.508257	0.765794	0.706397	0.769707	0.375272	0.519511	0.445714	0.433344			609.4	0.330905	0.33353	0.248848	0.242143	0.438447	0.397847	0.297405	0.284182					609.4	0.472823	0.439963
609.6	0.412464	0.416526	0.418271	0.343617	0.34048	0.344367	0.968153	0.849788	1.03218	0.371287	0.309728	0.323289			609.6	0.51069	0.574816	0.556926	0.618016	0.455397	0.459516	0.452387	0.458805	0.505567	0.76121	0.701955	0.764042	0.373348	0.517145	0.44389	0.431372			609.6	0.328877	0.331344	0.247254	0.240591	0.434989	0.394651	0.295579	0.281966					609.6	0.470449	0.437607
609.8	0.410582	0.414652	0.416067	0.341962	0.338972	0.342978	0.961065	0.843371	1.02432	0.369092	0.307794	0.321027			609.8	0.508395	0.572622	0.554593	0.615387	0.453341	0.457572	0.450349	0.456914	0.504271	0.756748	0.698236	0.759734	0.371689	0.515127	0.441816	0.429175			609.8	0.327277	0.329691	0.245948	0.239343	0.432057	0.392173	0.293798	0.280133					609.8	0.468323	0.435713
610	0.407645	0.411295	0.41289	0.339508	0.336435	0.340631	0.951085	0.833566	1.01289	0.366018	0.306379	0.319668			610	0.505229	0.5689	0.550862	0.611722	0.450438	0.454365	0.447604	0.453801	0.501592	0.750893	0.692252	0.753023	0.369991	0.512447	0.438739	0.425951			610	0.324775	0.327069	0.243891	0.237584	0.428146	0.388534	0.291593	0.277702					610	0.465142	0.432586
610.2	0.406142	0.409596	0.411091	0.338309	0.334958	0.339314	0.945871	0.829499	1.00745	0.36473	0.305585	0.31821			610.2	0.503812	0.566987	0.548904	0.609974	0.44918	0.452858	0.446258	0.452594	0.499321	0.747553	0.68948	0.750385	0.369362	0.510847	0.437728	0.424795			610.2	0.323424	0.325817	0.242885	0.236609	0.426588	0.386785	0.290479	0.276502					610.2	0.463131	0.431038
610.4	0.403243	0.406693	0.407921	0.335809	0.332769	0.33701	0.936107	0.82109	0.996014	0.361506	0.303362	0.31693			610.4	0.500551	0.563288	0.545472	0.606103	0.446304	0.449973	0.443318	0.449546	0.496305	0.741255	0.684207	0.744264	0.367014	0.507485	0.43498	0.422498			610.4	0.320907	0.323152	0.240994	0.234771	0.422824	0.383068	0.288259	0.2744					610.4	0.45966	0.427767
610.6	0.400933	0.404298	0.405295	0.333761	0.330733	0.33515	0.927759	0.813782	0.986639	0.359533	0.301518	0.314561			610.6	0.497878	0.560191	0.542473	0.603035	0.444056	0.447528	0.440693	0.447004	0.493174	0.736941	0.68017	0.738886	0.364461	0.504797	0.432811	0.420545			610.6	0.318704	0.321005	0.23938	0.233288	0.419556	0.379986	0.286304	0.272359					610.6	0.456764	0.425217
610.8	0.399085	0.40257	0.403182	0.332131	0.328894	0.333608	0.921141	0.807762	0.979092	0.357603	0.300237	0.312584			610.8	0.495907	0.557689	0.540249	0.60047	0.44239	0.44555	0.438651	0.445028	0.490704	0.732974	0.676458	0.734478	0.363055	0.502749	0.430765	0.418895			610.8	0.316981	0.319299	0.238107	0.232054	0.416853	0.37754	0.284715	0.270773					610.8	0.454685	0.423084
611	0.395997	0.399407	0.400534	0.329583	0.326504	0.331367	0.910105	0.799173	0.967292	0.354429	0.298757	0.31077			611	0.492966	0.554135	0.536437	0.596688	0.439533	0.442897	0.435685	0.442259	0.486067	0.727181	0.670621	0.728486	0.361666	0.500095	0.427382	0.41606			611	0.314349	0.316777	0.236366	0.230233	0.413168	0.373995	0.282217	0.268314					611	0.451234	0.420143
611.2	0.394334	0.398087	0.398864	0.328532	0.325376	0.33018	0.90483	0.794767	0.962932	0.353539	0.299142	0.310037			611.2	0.491434	0.552372	0.534829	0.594913	0.437953	0.441505	0.434361	0.440919	0.484673	0.724463	0.668143	0.725532	0.360833	0.498604	0.426288	0.415129			611.2	0.313185	0.315488	0.235434	0.229315	0.411352	0.37237	0.281384	0.267085					611.2	0.44949	0.419024
611.4	0.391767	0.394927	0.396129	0.325873	0.323183	0.32784	0.89463	0.78607	0.952098	0.350487	0.297912	0.308231			611.4	0.488504	0.549138	0.531282	0.591408	0.435551	0.438358	0.431606	0.438087	0.481067	0.718604	0.662564	0.720624	0.35827	0.495416	0.42331	0.412832			611.4	0.31059	0.313021	0.23358	0.227357	0.40778	0.369109	0.279358	0.264519					611.4	0.445941	0.41617
611.6	0.389405	0.392501	0.393734	0.323927	0.321157	0.326089	0.886502	0.778724	0.944075	0.347972	0.295568	0.306061			611.6	0.48579	0.546169	0.528377	0.588294	0.433496	0.435893	0.429327	0.435684	0.477952	0.71369	0.657294	0.715962	0.355987	0.492123	0.420903	0.41086			611.6	0.308555	0.310858	0.231982	0.225818	0.404323	0.366047	0.277322	0.2624					611.6	0.443341	0.414171
611.8	0.387312	0.390549	0.391752	0.32238	0.319536	0.324698	0.87989	0.773062	0.936805	0.346142	0.293877	0.304119			611.8	0.483657	0.543783	0.52609	0.585597	0.431852	0.433873	0.427398	0.433576	0.475301	0.709658	0.653376	0.711414	0.354113	0.490001	0.419103	0.409071			611.8	0.306889	0.309149	0.230745	0.224683	0.401711	0.363518	0.275804	0.260814					611.8	0.441593	0.412265
612	0.384524	0.38745	0.388504	0.32035	0.317026	0.322474	0.870192	0.764416	0.926441	0.342863	0.291456	0.301075			612	0.480571	0.539795	0.522518	0.582031	0.428833	0.430781	0.424416	0.430639	0.47218	0.703856	0.648451	0.706137	0.35145	0.487013	0.416073	0.406308			612	0.304341	0.30677	0.228884	0.222804	0.397773	0.360218	0.273791	0.258153					612	0.438634	0.409417
612.2	0.383125	0.385995	0.387032	0.318993	0.316022	0.321262	0.86515	0.760016	0.921854	0.341116	0.291117	0.299816			612.2	0.478945	0.53808	0.520788	0.579991	0.42723	0.429278	0.423126	0.429207	0.471237	0.701251	0.645881	0.703341	0.350111	0.485408	0.414689	0.404969			612.2	0.303115	0.305507	0.228061	0.221846	0.395964	0.358766	0.272771	0.257011					612.2	0.437109	0.408081
612.4	0.380621	0.382895	0.383896	0.316976	0.313864	0.319026	0.855148	0.751473	0.910537	0.338661	0.289593	0.297703			612.4	0.476033	0.534518	0.51712	0.576397	0.424349	0.4265	0.420327	0.426395	0.467665	0.695205	0.640322	0.698261	0.348545	0.482511	0.411699	0.402389			612.4	0.300862	0.303026	0.226308	0.220065	0.392092	0.355001	0.270674	0.255098					612.4	0.434237	0.405243
612.6	0.378042	0.380478	0.381581	0.315045	0.312051	0.317081	0.847811	0.744959	0.902328	0.336433	0.287895	0.296224			612.6	0.473262	0.531812	0.514558	0.573247	0.422139	0.42406	0.417987	0.423993	0.464859	0.69036	0.636166	0.694015	0.347089	0.479702	0.409157	0.400206			612.6	0.298801	0.30107	0.224925	0.21854	0.389182	0.352413	0.268772	0.253305					612.6	0.431671	0.402883
612.8	0.375899	0.378442	0.379558	0.313411	0.310441	0.315664	0.84195	0.739612	0.895919	0.334818	0.286205	0.29515			612.8	0.471256	0.529739	0.512446	0.570894	0.420264	0.422168	0.416092	0.422295	0.46235	0.686111	0.632601	0.690547	0.345827	0.477279	0.407329	0.398508			612.8	0.297233	0.299452	0.223776	0.217352	0.386641	0.350249	0.267279	0.251926					612.8	0.429733	0.400798
613	0.373158	0.375319	0.377003	0.310917	0.307984	0.313072	0.832861	0.731081	0.885982	0.332104	0.285135	0.292866			613	0.4683	0.525996	0.509263	0.567202	0.417825	0.419455	0.413317	0.419703	0.458453	0.68107	0.627359	0.684186	0.343693	0.474439	0.405069	0.396503			613	0.294738	0.297005	0.221938	0.215575	0.382989	0.346477	0.265769	0.24961					613	0.426799	0.397933
613.2	0.371748	0.374103	0.375521	0.309892	0.306771	0.311965	0.828836	0.727635	0.880804	0.331203	0.284174	0.292425			613.2	0.466721	0.524282	0.507685	0.565345	0.416537	0.418068	0.411819	0.418163	0.456793	0.678243	0.624968	0.681798	0.342596	0.472691	0.403582	0.395932			613.2	0.293475	0.295812	0.221112	0.214642	0.381125	0.344697	0.264743	0.248854					613.2	0.425465	0.396488
613.4	0.36894	0.371458	0.372846	0.307402	0.304568	0.309465	0.820189	0.720257	0.871102	0.329068	0.282202	0.290277			613.4	0.463825	0.521021	0.504482	0.561679	0.413531	0.415436	0.409014	0.415329	0.453177	0.672697	0.620499	0.676521	0.339801	0.469329	0.400374	0.393236			613.4	0.291056	0.293516	0.219505	0.212934	0.377374	0.341633	0.262462	0.246586					613.4	0.422555	0.393883
613.6	0.367634	0.369918	0.371435	0.306312	0.303525	0.307906	0.815937	0.715947	0.865902	0.328267	0.281465	0.288307			613.6	0.462352	0.519194	0.502863	0.559777	0.412061	0.414211	0.40762	0.413919	0.451606	0.670297	0.618025	0.673691	0.338726	0.467584	0.398935	0.392075			613.6	0.289826	0.292368	0.21869	0.212128	0.375682	0.339946	0.261432	0.245265					613.6	0.420823	0.392681
613.8	0.365069	0.367409	0.3688	0.304024	0.301175	0.305681	0.806753	0.708076	0.85684	0.325325	0.279377	0.285277			613.8	0.459474	0.515932	0.499528	0.556382	0.409337	0.411676	0.405146	0.411344	0.448182	0.664377	0.613135	0.668659	0.337001	0.464144	0.395759	0.388703			613.8	0.287686	0.290049	0.216974	0.210381	0.372042	0.336712	0.259454	0.242827					613.8	0.418454	0.389902
614	0.363101	0.365414	0.366794	0.302622	0.299834	0.303972	0.800616	0.703625	0.850652	0.323772	0.278071	0.284594			614	0.457234	0.513651	0.497378	0.55403	0.407312	0.410032	0.403389	0.409404	0.445398	0.661254	0.609991	0.664946	0.335093	0.462222	0.394133	0.386957			614	0.286134	0.288434	0.215839	0.209255	0.369887	0.334586	0.258123	0.24127					614	0.416451	0.387944
614.2	0.360687	0.363129	0.364376	0.300976	0.297988	0.301809	0.793633	0.697611	0.842685	0.322052	0.276751	0.283378			614.2	0.45458	0.51055	0.494673	0.550848	0.404862	0.407629	0.401144	0.407088	0.442046	0.657075	0.606232	0.660422	0.333141	0.459704	0.392289	0.384592			614.2	0.284134	0.286442	0.214422	0.207878	0.367106	0.331936	0.256469	0.239448					614.2	0.414006	0.385464
614.4	0.358385	0.360589	0.361787	0.29881	0.295763	0.299366	0.785307	0.690399	0.832663	0.319714	0.273869	0.281777			614.4	0.451326	0.507333	0.491495	0.5475	0.402022	0.404718	0.398416	0.40441	0.438451	0.651908	0.601751	0.655448	0.330854	0.456359	0.38958	0.382764			614.4	0.28177	0.284139	0.21257	0.206135	0.364222	0.328696	0.254258	0.237653					614.4	0.410938	0.382724
614.6	0.356808	0.359362	0.360512	0.297891	0.294602	0.298334	0.781	0.686672	0.827954	0.318569	0.272358	0.280596			614.6	0.449729	0.505584	0.489912	0.545496	0.400541	0.403304	0.397104	0.40292	0.436737	0.649372	0.599364	0.652546	0.330198	0.455063	0.388224	0.381157			614.6	0.280724	0.283073	0.211813	0.205284	0.362418	0.327112	0.253377	0.236717					614.6	0.409567	0.381528
614.8	0.35396	0.356851	0.357871	0.29563	0.292599	0.296232	0.771822	0.679896	0.817882	0.316275	0.270661	0.27763			614.8	0.446495	0.502319	0.486785	0.542088	0.397751	0.400471	0.394445	0.400365	0.43387	0.643501	0.59495	0.646046	0.327965	0.452097	0.386008	0.378394			614.8	0.278485	0.280765	0.210136	0.203685	0.359147	0.323651	0.251455	0.234577					614.8	0.406874	0.378362
615	0.35219	0.355017	0.355954	0.294281	0.291204	0.294771	0.766232	0.674984	0.812092	0.314826	0.269188	0.276421			615	0.444598	0.500296	0.484694	0.539711	0.395986	0.39885	0.392571	0.39853	0.431169	0.640169	0.592151	0.643192	0.326675	0.450052	0.384243	0.376495			615	0.27708	0.279228	0.208994	0.202478	0.357003	0.321638	0.250202	0.232969					615	0.404824	0.376755
615.2	0.350032	0.352861	0.353979	0.292649	0.289432	0.292985	0.759	0.668906	0.804723	0.312957	0.267465	0.275489			615.2	0.442083	0.497795	0.482065	0.536742	0.393892	0.396555	0.390436	0.396223	0.428203	0.635881	0.588154	0.639464	0.32464	0.44736	0.382042	0.37413			615.2	0.275264	0.277267	0.207613	0.201119	0.354374	0.319028	0.248366	0.231174					615.2	0.402252	0.374689
615.4	0.347348	0.350275	0.351485	0.290497	0.287483	0.290638	0.751448	0.661425	0.794885	0.311509	0.266459	0.273519			615.4	0.43918	0.494577	0.478968	0.533002	0.391436	0.393913	0.387804	0.393275	0.424647	0.63094	0.583879	0.634145	0.322898	0.444142	0.379362	0.371986			615.4	0.273117	0.274972	0.205865	0.199498	0.351221	0.315834	0.246241	0.229023					615.4	0.399427	0.37192
615.6	0.346052	0.348926	0.350214	0.289555	0.286465	0.289479	0.747401	0.657928	0.791037	0.310099	0.265544	0.272345			615.6	0.437737	0.492859	0.477497	0.530992	0.390014	0.392579	0.386673	0.391763	0.422883	0.628639	0.581357	0.631525	0.321707	0.442467	0.378168	0.370427			615.6	0.272021	0.273759	0.205007	0.198664	0.349405	0.314305	0.245332	0.227843					615.6	0.398015	0.370329
615.8	0.343222	0.346023	0.347539	0.287464	0.284386	0.287376	0.739649	0.651313	0.782473	0.307019	0.263027	0.269777			615.8	0.43494	0.489371	0.474436	0.527543	0.387158	0.389863	0.383994	0.389305	0.420104	0.623707	0.576408	0.62634	0.319298	0.439405	0.376102	0.367424			615.8	0.26997	0.271584	0.203262	0.197063	0.345978	0.311153	0.243097	0.225538					615.8	0.394941	0.367503
616	0.34167	0.34436	0.345943	0.286167	0.28312	0.28579	0.733872	0.646695	0.776825	0.305427	0.261707	0.268191			616	0.433294	0.486998	0.472288	0.525093	0.385448	0.388121	0.382214	0.387427	0.418086	0.62061	0.572919	0.6228	0.317694	0.437809	0.374302	0.365476			616	0.268546	0.270149	0.202163	0.196039	0.343987	0.308877	0.241642	0.224056					616	0.393251	0.365877
616.2	0.339594	0.342194	0.343678	0.284525	0.281506	0.283812	0.726579	0.640809	0.76989	0.30326	0.260145	0.266626			616.2	0.430936	0.484152	0.469594	0.522113	0.383369	0.385918	0.380042	0.38519	0.415071	0.616705	0.568315	0.6189	0.31588	0.435304	0.371697	0.36349			616.2	0.266754	0.268396	0.200825	0.194756	0.341547	0.306263	0.239851	0.222456					616.2	0.390797	0.363907
616.4	0.33706	0.339485	0.340872	0.282496	0.279546	0.281541	0.718396	0.633662	0.762421	0.301175	0.258723	0.264457			616.4	0.428111	0.480944	0.466261	0.518362	0.380711	0.38318	0.377494	0.382518	0.411371	0.611698	0.563116	0.614362	0.313521	0.432364	0.368735	0.360737			616.4	0.264679	0.266083	0.199254	0.193146	0.338592	0.303693	0.23778	0.22018					616.4	0.387628	0.361125
616.6	0.33589	0.3381	0.33983	0.281526	0.278554	0.280537	0.713879	0.630415	0.757819	0.299666	0.257794	0.263888			616.6	0.426825	0.479437	0.464812	0.516569	0.379431	0.381924	0.376282	0.381208	0.409673	0.609141	0.560908	0.611714	0.3126	0.431116	0.367493	0.35994			616.6	0.263625	0.264959	0.198431	0.192352	0.336935	0.302078	0.237037	0.219285					616.6	0.385913	0.359933
616.8	0.333623	0.33563	0.337256	0.279335	0.276599	0.278751	0.705652	0.623677	0.750393	0.297089	0.255687	0.261932			616.8	0.42417	0.476183	0.461559	0.513248	0.376798	0.379223	0.373804	0.378756	0.406581	0.604405	0.556419	0.606696	0.309777	0.428075	0.364912	0.356765			616.8	0.261707	0.262735	0.196724	0.190819	0.333917	0.299101	0.235145	0.21707					616.8	0.382991	0.357501
617	0.331816	0.333714	0.33534	0.278068	0.275365	0.277304	0.700333	0.619463	0.745094	0.295331	0.254297	0.260601			617	0.422307	0.473889	0.459512	0.510563	0.375123	0.377388	0.372009	0.37707	0.404215	0.60136	0.553568	0.603257	0.308212	0.426162	0.363231	0.355326			617	0.260251	0.261269	0.195603	0.189764	0.331999	0.297065	0.233781	0.21568					617	0.380783	0.355886
617.2	0.329621	0.331429	0.333254	0.27645	0.273873	0.275615	0.694146	0.614282	0.738436	0.29333	0.252959	0.258852			617.2	0.419909	0.471169	0.456929	0.507385	0.372858	0.375178	0.369851	0.375042	0.401668	0.597215	0.549757	0.599731	0.306844	0.423687	0.361062	0.353426			617.2	0.258472	0.259472	0.194282	0.18847	0.329691	0.29481	0.232076	0.213984					617.2	0.377992	0.353998
617.4	0.327191	0.329075	0.330618	0.274245	0.272308	0.273935	0.686699	0.606917	0.731671	0.291008	0.251601	0.2558			617.4	0.417239	0.468128	0.453808	0.503898	0.370324	0.372517	0.367245	0.372592	0.399011	0.592244	0.544832	0.595256	0.304749	0.42146	0.358639	0.350649			617.4	0.256433	0.257538	0.192622	0.186912	0.32665	0.291986	0.230442	0.211804					617.4	0.375593	0.351524
617.6	0.325828	0.327783	0.329368	0.27337	0.271519	0.273021	0.683597	0.603772	0.728527	0.289493	0.2508	0.254498			617.6	0.415905	0.466353	0.452201	0.502137	0.369089	0.371376	0.365968	0.371191	0.397842	0.589813	0.542655	0.592857	0.303652	0.420212	0.357255	0.349205			617.6	0.255451	0.25651	0.191857	0.186142	0.325119	0.290882	0.229636	0.210748					617.6	0.37427	0.350413
617.8	0.323414	0.325163	0.32694	0.27105	0.269999	0.271325	0.675818	0.598078	0.721158	0.28758	0.249225	0.252578			617.8	0.413282	0.463093	0.449118	0.498689	0.366412	0.368717	0.363434	0.368722	0.394463	0.585385	0.538456	0.588122	0.302092	0.417115	0.355046	0.346787			617.8	0.253504	0.254379	0.190396	0.18457	0.322	0.288109	0.22781	0.208584					617.8	0.371543	0.347664
618	0.321862	0.323375	0.325346	0.269685	0.268767	0.269874	0.671351	0.593807	0.716243	0.286114	0.24804	0.251774			618	0.411513	0.461061	0.44713	0.49628	0.36443	0.367141	0.361701	0.367027	0.392368	0.582584	0.535847	0.585153	0.300813	0.415297	0.352925	0.345127			618	0.252177	0.252976	0.18935	0.183515	0.320072	0.286322	0.226461	0.207309					618	0.369677	0.346096
618.2	0.319903	0.321109	0.323376	0.267891	0.267213	0.26811	0.665944	0.588619	0.710482	0.284765	0.246586	0.249654			618.2	0.409164	0.458291	0.444454	0.493358	0.362095	0.365076	0.359644	0.364746	0.390008	0.578661	0.532119	0.58168	0.299462	0.412944	0.35007	0.342868			618.2	0.250526	0.251238	0.188077	0.182281	0.317759	0.284366	0.224713	0.205707					618.2	0.367645	0.343834
618.4	0.317469	0.318878	0.320792	0.265843	0.265454	0.265959	0.658927	0.582541	0.703418	0.282067	0.245587	0.24767			618.4	0.406783	0.454948	0.441581	0.489927	0.359263	0.362375	0.357161	0.362118	0.387357	0.574081	0.527527	0.576346	0.297467	0.410413	0.34798	0.340824			618.4	0.248468	0.24915	0.186454	0.180809	0.314945	0.281805	0.222963	0.204095					618.4	0.36482	0.341345
618.6	0.316175	0.317547	0.319691	0.264777	0.264682	0.264971	0.655378	0.579204	0.69999	0.280807	0.244607	0.246397			618.6	0.405357	0.453575	0.440011	0.488365	0.357765	0.361045	0.355846	0.360631	0.385675	0.57132	0.525021	0.573995	0.296596	0.40883	0.346711	0.339793			618.6	0.247378	0.248144	0.185807	0.180091	0.313467	0.280313	0.222281	0.203049					618.6	0.363572	0.340162
618.8	0.313685	0.315119	0.317393	0.262781	0.262667	0.2631	0.64787	0.573741	0.692393	0.27812	0.24227	0.245123			618.8	0.402435	0.450641	0.436984	0.485236	0.355147	0.358697	0.353284	0.358244	0.381849	0.566614	0.520842	0.568671	0.294131	0.405916	0.344118	0.338503			618.8	0.245295	0.246232	0.184186	0.178612	0.310631	0.277699	0.220581	0.201635					618.8	0.361182	0.337786
619	0.312129	0.313535	0.315788	0.261418	0.261251	0.261753	0.642888	0.569809	0.68735	0.277031	0.240995	0.243587			619	0.400687	0.448659	0.434982	0.482995	0.353603	0.357086	0.351502	0.356571	0.379423	0.563404	0.51849	0.565495	0.292764	0.403906	0.342369	0.337088			619	0.243864	0.244902	0.183146	0.177584	0.308804	0.276056	0.219485	0.200361					619	0.359569	0.335968
619.2	0.31022	0.311668	0.31368	0.25975	0.259417	0.260221	0.637608	0.564794	0.681197	0.275046	0.239746	0.241588			619.2	0.398361	0.446208	0.432343	0.480171	0.351555	0.355056	0.349451	0.354453	0.376623	0.559202	0.51527	0.561494	0.29132	0.401292	0.340025	0.334953			619.2	0.242193	0.243168	0.181878	0.176298	0.306281	0.274066	0.218005	0.19875					619.2	0.357402	0.333767
619.4	0.307915	0.309596	0.311509	0.257768	0.257484	0.258451	0.631056	0.559568	0.673864	0.273498	0.238164	0.239945			619.4	0.395635	0.443121	0.42939	0.476936	0.349108	0.35264	0.347013	0.351951	0.37428	0.554583	0.511424	0.55675	0.288944	0.398152	0.337837	0.333015			619.4	0.240158	0.241101	0.180393	0.174653	0.303662	0.271808	0.216184	0.197116					619.4	0.354711	0.331371
619.6	0.306612	0.308632	0.31041	0.256832	0.256518	0.257638	0.627756	0.557237	0.670791	0.272265	0.237421	0.239582			619.6	0.3943	0.441752	0.427944	0.475378	0.347984	0.351333	0.345785	0.350841	0.373183	0.552452	0.509731	0.55475	0.288221	0.39676	0.337016	0.331725			619.6	0.239059	0.24004	0.179721	0.173923	0.302318	0.270552	0.21534	0.196377					619.6	0.353532	0.330071
619.8	0.304341	0.306416	0.308404	0.254733	0.254882	0.255791	0.621569	0.551229	0.664296	0.270335	0.235199	0.237783			619.8	0.391389	0.438545	0.424789	0.472149	0.345571	0.349002	0.34338	0.34848	0.370211	0.548016	0.505547	0.55038	0.286363	0.393938	0.334851	0.329446			619.8	0.237081	0.238161	0.17826	0.172503	0.299383	0.268025	0.213448	0.194539					619.8	0.350935	0.328074
620	0.302723	0.304725	0.306821	0.253368	0.25359	0.254529	0.618003	0.547643	0.659289	0.268892	0.234187	0.236325			620	0.389431	0.436656	0.422901	0.469953	0.344054	0.3473	0.34165	0.346798	0.368232	0.54478	0.502672	0.54731	0.285426	0.39205	0.333284	0.328376			620	0.235755	0.236914	0.177388	0.171466	0.297514	0.266361	0.212339	0.193514					620	0.349458	0.32635
620.2	0.300681	0.302737	0.304991	0.251522	0.252198	0.252975	0.613856	0.542865	0.653435	0.267593	0.233002	0.234909			620.2	0.387275	0.434182	0.420296	0.467408	0.342226	0.345162	0.339523	0.344629	0.36585	0.540518	0.499068	0.543731	0.284423	0.389836	0.331579	0.326693			620.2	0.23401	0.235305	0.176225	0.170243	0.295165	0.264502	0.210983	0.192135					620.2	0.347345	0.32417
620.4	0.298488	0.300651	0.302618	0.249497	0.250167	0.251066	0.607791	0.536928	0.645867	0.265613	0.231529	0.232853			620.4	0.384691	0.431686	0.41743	0.464105	0.339891	0.342535	0.336985	0.341912	0.363132	0.536638	0.494635	0.539117	0.281986	0.386909	0.329141	0.324683			620.4	0.232163	0.233178	0.174848	0.168815	0.292409	0.261784	0.209179	0.19065					620.4	0.344776	0.322249
620.6	0.297406	0.299301	0.301405	0.248662	0.249061	0.249943	0.604462	0.534232	0.642118	0.264839	0.230139	0.232377			620.6	0.383306	0.430022	0.415988	0.462539	0.338826	0.341311	0.335893	0.340822	0.361908	0.534681	0.49283	0.536809	0.281071	0.385109	0.327685	0.324035			620.6	0.2312	0.232115	0.174095	0.168124	0.290977	0.260584	0.208275	0.189872					620.6	0.343418	0.321047
620.8	0.295068	0.2969	0.298903	0.246644	0.246933	0.247761	0.598043	0.529294	0.634806	0.26286	0.228257	0.231353			620.8	0.380699	0.427127	0.413201	0.45934	0.336439	0.338663	0.333477	0.338249	0.358904	0.530184	0.488976	0.532943	0.278755	0.38226	0.325143	0.322174			620.8	0.229303	0.230117	0.17261	0.166713	0.287921	0.257984	0.206285	0.188396					620.8	0.34048	0.318888
621	0.293569	0.29539	0.297363	0.245482	0.245497	0.246292	0.594361	0.52547	0.630182	0.261152	0.22679	0.230264			621	0.378784	0.425134	0.411198	0.457015	0.334867	0.337095	0.331907	0.336677	0.35709	0.527118	0.486062	0.529619	0.277118	0.380311	0.323403	0.320639			621	0.2279	0.22896	0.171538	0.165806	0.286097	0.256254	0.205189	0.187311					621	0.338958	0.317373
621.2	0.291639	0.293383	0.295311	0.24412	0.243919	0.24477	0.589916	0.521788	0.624783	0.259227	0.225266	0.228671			621.2	0.376447	0.422614	0.408639	0.454293	0.333018	0.335047	0.329769	0.33477	0.354797	0.523634	0.482778	0.525738	0.275089	0.378041	0.321539	0.318821			621.2	0.226137	0.227452	0.170182	0.164682	0.283922	0.254189	0.203774	0.186062					621.2	0.336877	0.315411
621.4	0.289198	0.291094	0.292878	0.242384	0.241939	0.242992	0.583718	0.516498	0.618097	0.256623	0.22417	0.226843			621.4	0.373798	0.419739	0.405689	0.450998	0.330716	0.332691	0.32758	0.332392	0.352018	0.51918	0.479261	0.521934	0.272956	0.375258	0.319548	0.316686			621.4	0.224251	0.225573	0.168762	0.163238	0.281449	0.251717	0.202117	0.184534					621.4	0.334464	0.313149
621.6	0.287344	0.289242	0.291147	0.240954	0.24015	0.241473	0.578936	0.512104	0.612727	0.255241	0.222473	0.225705			621.6	0.371374	0.417615	0.403082	0.448341	0.328952	0.330744	0.325546	0.330584	0.349868	0.515749	0.476346	0.518451	0.271423	0.372865	0.317292	0.315424			621.6	0.222783	0.224091	0.167546	0.162028	0.279244	0.249813	0.200437	0.183283					621.6	0.332371	0.311174
621.8	0.285801	0.287896	0.289866	0.239983	0.238775	0.240288	0.575043	0.508735	0.608765	0.254097	0.221301	0.224716			621.8	0.369494	0.415628	0.40116	0.446245	0.327548	0.329281	0.323971	0.329235	0.348214	0.513139	0.474201	0.515832	0.270001	0.37123	0.315678	0.313966			621.8	0.221592	0.222939	0.16659	0.161067	0.27761	0.248276	0.199154	0.182182					621.8	0.330594	0.309743
622	0.2836	0.285774	0.287459	0.238051	0.23681	0.238448	0.570277	0.503471	0.602868	0.252714	0.220379	0.222867			622	0.367143	0.412753	0.398324	0.44313	0.325418	0.326738	0.321752	0.326912	0.346136	0.508946	0.469994	0.51245	0.268507	0.368903	0.31364	0.311237			622	0.219901	0.220937	0.165294	0.159672	0.274885	0.245982	0.197621	0.180305					622	0.32768	0.307295
622.2	0.282542	0.284635	0.28638	0.236996	0.23582	0.237509	0.567524	0.501121	0.599639	0.251786	0.219623	0.222177			622.2	0.365697	0.411372	0.396978	0.441461	0.324123	0.325359	0.32053	0.325639	0.344509	0.507154	0.468055	0.510316	0.267509	0.367507	0.312478	0.310162			622.2	0.219014	0.219975	0.164613	0.158984	0.273819	0.244854	0.196727	0.179595					622.2	0.326401	0.306178
622.4	0.280308	0.282496	0.284369	0.235234	0.23415	0.235844	0.5622	0.496093	0.593955	0.249696	0.218381	0.221088			622.4	0.362983	0.408538	0.394166	0.438582	0.32189	0.323121	0.31813	0.323267	0.342133	0.503318	0.464593	0.506363	0.265215	0.365202	0.310785	0.308378			622.4	0.217122	0.218152	0.163165	0.157542	0.271343	0.24264	0.195305	0.178192					622.4	0.323874	0.304245
622.6	0.278252	0.280443	0.282378	0.233731	0.232534	0.234583	0.557904	0.491904	0.588549	0.2476	0.216876	0.219346			622.6	0.360801	0.406111	0.391626	0.43597	0.319828	0.321202	0.316089	0.321358	0.339674	0.499734	0.461401	0.502842	0.263313	0.363075	0.308715	0.306598			622.6	0.215736	0.216647	0.162035	0.156428	0.269328	0.24073	0.193852	0.176668					622.6	0.321826	0.30216
622.8	0.276681	0.278666	0.280919	0.232578	0.231175	0.233396	0.554006	0.488574	0.584374	0.245875	0.215787	0.218236			622.8	0.359155	0.404275	0.389923	0.433794	0.318252	0.319697	0.314465	0.319969	0.337618	0.497099	0.458915	0.500271	0.261693	0.361435	0.307018	0.305106			622.8	0.214584	0.21546	0.161037	0.155483	0.267668	0.239205	0.192895	0.175371					622.8	0.320198	0.300728
623	0.274366	0.276398	0.278429	0.231116	0.229142	0.231706	0.548322	0.483944	0.577702	0.243885	0.214224	0.215896			623	0.356635	0.401605	0.38742	0.43079	0.315836	0.317307	0.31214	0.31761	0.335209	0.492945	0.455255	0.495872	0.259664	0.358695	0.304535	0.302617			623	0.212744	0.213653	0.159527	0.154121	0.265516	0.236925	0.191112	0.173932					623	0.317922	0.298095
623.2	0.273178	0.275558	0.277269	0.230256	0.228239	0.230782	0.545148	0.481644	0.574963	0.243116	0.213872	0.215149			623.2	0.355428	0.400175	0.386107	0.429318	0.314545	0.3161	0.311183	0.316453	0.333864	0.490779	0.45328	0.494255	0.258721	0.357617	0.303421	0.301321			623.2	0.211821	0.21265	0.158782	0.153428	0.264364	0.235817	0.190417	0.173012					623.2	0.316734	0.297173
623.4	0.270777	0.273286	0.274988	0.228649	0.226365	0.228911	0.539282	0.477558	0.569373	0.241015	0.211797	0.21389			623.4	0.352582	0.397138	0.383551	0.426526	0.312104	0.313935	0.308829	0.314427	0.331449	0.48713	0.450001	0.490221	0.256339	0.355494	0.300994	0.299259			623.4	0.210057	0.210848	0.157277	0.152104	0.262084	0.23364	0.189104	0.171502					623.4	0.314752	0.294926
623.6	0.268939	0.271499	0.273127	0.227237	0.224884	0.22765	0.535274	0.47328	0.565439	0.239296	0.210132	0.212275			623.6	0.350336	0.394653	0.381185	0.424081	0.31015	0.312137	0.306821	0.312663	0.32936	0.48359	0.44715	0.48752	0.254785	0.353685	0.299063	0.297086			623.6	0.208533	0.209446	0.156074	0.151072	0.26	0.232028	0.187626	0.170271					623.6	0.312825	0.292771
623.8	0.267557	0.269951	0.271633	0.22607	0.223612	0.226705	0.532227	0.470635	0.562338	0.237438	0.209094	0.21108			623.8	0.348583	0.392929	0.379273	0.422152	0.308701	0.310613	0.305188	0.311091	0.327551	0.480893	0.444798	0.485112	0.253313	0.352415	0.297683	0.295364			623.8	0.207255	0.208333	0.155182	0.150212	0.258355	0.230717	0.186682	0.169201					623.8	0.311306	0.291001
624	0.265435	0.267949	0.269576	0.224451	0.221821	0.225222	0.526958	0.466165	0.558084	0.235685	0.207519	0.209231			624	0.345867	0.389958	0.376615	0.419223	0.306517	0.308432	0.30281	0.30896	0.324139	0.47734	0.441431	0.48069	0.251979	0.349775	0.295538	0.292936			624	0.205571	0.206651	0.153819	0.148837	0.256355	0.228798	0.184964	0.167707					624	0.309147	0.288955
624.2	0.264562	0.267001	0.268507	0.223591	0.22105	0.224373	0.524166	0.464	0.55558	0.234646	0.206565	0.208648			624.2	0.344711	0.388618	0.375334	0.417761	0.305468	0.307406	0.301643	0.307843	0.322926	0.475583	0.439766	0.478622	0.25103	0.348888	0.29465	0.292255			624.2	0.204787	0.205645	0.153198	0.148163	0.255329	0.22759	0.184108	0.167046					624.2	0.307972	0.287939
624.4	0.262491	0.26495	0.266377	0.221778	0.219176	0.22285	0.518521	0.459177	0.549428	0.232927	0.205156	0.2064			624.4	0.342192	0.385874	0.372588	0.414948	0.303376	0.305165	0.299447	0.305524	0.320026	0.471873	0.436725	0.474919	0.249415	0.346448	0.292806	0.289756			624.4	0.203047	0.203893	0.151991	0.14693	0.253289	0.225624	0.182335	0.165442					624.4	0.306019	0.285639
624.6	0.26079	0.263076	0.264616	0.220331	0.217811	0.221488	0.514773	0.455681	0.54548	0.231185	0.203663	0.204714			624.6	0.340019	0.383458	0.370496	0.412387	0.301622	0.303302	0.297563	0.303717	0.318019	0.46858	0.433628	0.471455	0.247552	0.34406	0.290891	0.287535			624.6	0.20161	0.202389	0.150921	0.14586	0.251245	0.223976	0.180948	0.164022					624.6	0.304069	0.28382
624.8	0.259483	0.261537	0.263041	0.219117	0.216726	0.220292	0.51171	0.453125	0.541973	0.22988	0.202568	0.203028			624.8	0.338373	0.381447	0.368915	0.410381	0.300119	0.301868	0.296017	0.302264	0.316404	0.466201	0.431244	0.468899	0.246366	0.342185	0.289308	0.285703			624.8	0.200562	0.201143	0.150067	0.145032	0.249747	0.222554	0.179869	0.162906					624.8	0.302349	0.282457
625	0.257382	0.259529	0.260767	0.217051	0.214994	0.218775	0.506866	0.449769	0.536887	0.227541	0.200461	0.200987			625	0.336002	0.378716	0.366197	0.407401	0.297781	0.299619	0.293843	0.300199	0.314166	0.4629	0.427521	0.465205	0.244282	0.339611	0.286965	0.283314			625	0.198896	0.199323	0.148776	0.143794	0.247439	0.220526	0.178346	0.161494					625	0.300034	0.280377
625.2	0.256236	0.258574	0.259675	0.216096	0.214129	0.218086	0.504942	0.447611	0.534134	0.226839	0.199436	0.200667			625.2	0.334829	0.377392	0.364904	0.40608	0.296656	0.298598	0.292594	0.299123	0.312942	0.461256	0.426153	0.463205	0.243274	0.338362	0.285851	0.282772			625.2	0.197995	0.198518	0.14812	0.14318	0.246481	0.219412	0.177571	0.160719					625.2	0.298895	0.279399
625.4	0.254162	0.256278	0.25758	0.214493	0.212515	0.21633	0.499502	0.442942	0.528992	0.22434	0.197912	0.199109			625.4	0.332338	0.374395	0.362159	0.402923	0.294446	0.296668	0.290239	0.296963	0.310053	0.457307	0.422723	0.458825	0.241195	0.335875	0.28361	0.280407			625.4	0.196277	0.196773	0.146818	0.141932	0.244107	0.217378	0.176025	0.159202					625.4	0.296798	0.277422
625.6	0.252706	0.254794	0.256065	0.213308	0.211266	0.215172	0.49619	0.440175	0.525812	0.223295	0.196554	0.198085			625.6	0.330827	0.372604	0.360407	0.400876	0.292966	0.295165	0.288886	0.295564	0.308057	0.454684	0.420336	0.456503	0.240131	0.334178	0.281988	0.279064			625.6	0.195184	0.195634	0.146022	0.141085	0.242718	0.21607	0.174888	0.158203					625.6	0.295374	0.275989
625.8	0.25107	0.252872	0.254385	0.211953	0.209897	0.213661	0.492381	0.437127	0.521779	0.221952	0.194966	0.196705			625.8	0.328718	0.370421	0.358308	0.39818	0.291038	0.293185	0.28714	0.293732	0.306249	0.45134	0.417576	0.453956	0.238863	0.332295	0.280097	0.27726			625.8	0.193763	0.194248	0.145017	0.140108	0.240775	0.214405	0.173628	0.157078					625.8	0.293716	0.274366
626	0.249313	0.251084	0.251955	0.210215	0.208308	0.211937	0.488477	0.433137	0.516949	0.220487	0.193045	0.19445			626	0.326183	0.367442	0.355588	0.395309	0.288703	0.290957	0.285002	0.291416	0.304264	0.448221	0.414007	0.450243	0.237088	0.329907	0.278114	0.274967			626	0.192086	0.19257	0.143786	0.138883	0.23857	0.212501	0.172037	0.15575					626	0.291257	0.272171
626.2	0.248409	0.249925	0.2509	0.209201	0.20753	0.211014	0.486249	0.431132	0.515434	0.219812	0.19211	0.193988			626.2	0.32501	0.365957	0.354077	0.393953	0.287616	0.289777	0.283987	0.290286	0.302897	0.446142	0.412322	0.448732	0.236625	0.328476	0.277143	0.274238			626.2	0.191315	0.191787	0.143077	0.138245	0.237262	0.21176	0.171357	0.155072					626.2	0.290281	0.270954
626.4	0.246471	0.24787	0.249054	0.20753	0.205826	0.209368	0.482573	0.427052	0.511259	0.21833	0.191174	0.192487			626.4	0.322776	0.36315	0.351448	0.39105	0.285566	0.287654	0.281833	0.288175	0.300477	0.443102	0.409459	0.444928	0.234767	0.326476	0.275477	0.272799			626.4	0.189681	0.190107	0.141908	0.137149	0.235155	0.209769	0.170013	0.153767					626.4	0.287917	0.268766
626.6	0.24533	0.246648	0.247751	0.206347	0.204699	0.208359	0.47983	0.42403	0.508086	0.217164	0.190252	0.191036			626.6	0.321299	0.361372	0.349632	0.388893	0.284115	0.286263	0.280512	0.286599	0.298492	0.440867	0.407254	0.442563	0.233598	0.324593	0.274089	0.271163			626.6	0.188653	0.189048	0.141185	0.136248	0.233837	0.208308	0.168912	0.152834					626.6	0.286214	0.267478
626.8	0.243893	0.244892	0.246113	0.204853	0.203165	0.207153	0.476259	0.421077	0.503975	0.215577	0.189324	0.189954			626.8	0.319329	0.359253	0.347429	0.386473	0.282374	0.28451	0.278724	0.284564	0.29621	0.438214	0.404581	0.43921	0.23211	0.3224	0.272432	0.269546			626.8	0.187267	0.187692	0.140235	0.135064	0.232187	0.20666	0.167839	0.151715					626.8	0.284205	0.265922
627	0.241685	0.243129	0.244249	0.20322	0.201792	0.205402	0.47209	0.417542	0.499323	0.2142	0.187966	0.188838			627	0.316885	0.356521	0.344999	0.383662	0.280113	0.28238	0.276714	0.282353	0.294236	0.434225	0.401358	0.435449	0.230621	0.319817	0.270945	0.267551			627	0.185763	0.186038	0.139044	0.133848	0.230268	0.204839	0.166275	0.150378					627	0.281863	0.264245
627.2	0.240614	0.242006	0.243339	0.202413	0.201117	0.204424	0.470033	0.416146	0.496649	0.213139	0.18753	0.188098			627.2	0.315684	0.35524	0.343712	0.382192	0.279066	0.28126	0.275818	0.28112	0.29331	0.432394	0.399712	0.433871	0.229789	0.318451	0.270065	0.266726			627.2	0.184916	0.185283	0.138495	0.13325	0.229222	0.203711	0.165639	0.149737					627.2	0.280818	0.262908
627.4	0.238558	0.239691	0.241512	0.200782	0.199569	0.202906	0.466572	0.412149	0.492416	0.211502	0.186128	0.186682			627.4	0.313392	0.352509	0.341006	0.379314	0.277019	0.279032	0.273879	0.278913	0.291728	0.428693	0.396365	0.430844	0.227611	0.315998	0.267614	0.265076			627.4	0.183196	0.183634	0.137156	0.132135	0.227363	0.202097	0.164206	0.148307					627.4	0.278511	0.260457
627.6	0.23656	0.237746	0.239672	0.199264	0.197882	0.20107	0.463111	0.408313	0.48854	0.210031	0.184238	0.184954			627.6	0.311047	0.349887	0.338688	0.376526	0.274775	0.277068	0.271818	0.276838	0.29025	0.424953	0.392658	0.427745	0.225797	0.313732	0.265465	0.263382			627.6	0.181665	0.181989	0.135956	0.13096	0.225188	0.20044	0.16288	0.146971					627.6	0.27593	0.258744
627.8	0.235525	0.236979	0.238803	0.198284	0.197024	0.200251	0.461209	0.406494	0.485908	0.209346	0.18372	0.184669			627.8	0.309957	0.348606	0.337324	0.375175	0.273562	0.276126	0.270772	0.275578	0.289318	0.423274	0.39121	0.426162	0.225009	0.31261	0.264557	0.26285			627.8	0.180884	0.181247	0.135395	0.130374	0.224148	0.199533	0.162186	0.146472					627.8	0.275019	0.257789
628	0.233492	0.235041	0.23693	0.196664	0.195319	0.198703	0.457449	0.402843	0.481782	0.208577	0.182119	0.183645			628	0.307765	0.34593	0.334674	0.37255	0.271335	0.273823	0.268785	0.273448	0.286711	0.419673	0.387856	0.422857	0.223928	0.310666	0.262455	0.261459			628	0.179149	0.179741	0.134254	0.12922	0.222018	0.197758	0.160956	0.145263					628	0.27305	0.255894
628.2	0.23212	0.233226	0.235134	0.195528	0.193826	0.197332	0.454563	0.399558	0.478645	0.207223	0.181055	0.182408			628.2	0.305926	0.343592	0.332604	0.370236	0.269522	0.27204	0.267086	0.271555	0.285046	0.416859	0.38523	0.420339	0.222335	0.308705	0.261024	0.259665			628.2	0.177869	0.178439	0.13333	0.128239	0.220349	0.196401	0.159963	0.144224					628.2	0.27132	0.254085
628.4	0.230905	0.231742	0.233826	0.194526	0.19276	0.196352	0.452235	0.397464	0.476291	0.205846	0.180268	0.181405			628.4	0.304416	0.341774	0.331033	0.368143	0.268127	0.270682	0.265631	0.27007	0.283756	0.414549	0.383133	0.418041	0.221221	0.307091	0.259794	0.258254			628.4	0.176787	0.177432	0.132591	0.12745	0.219225	0.195232	0.159059	0.143454					628.4	0.270021	0.252736
628.6	0.228922	0.229824	0.231862	0.192948	0.191392	0.194832	0.448891	0.394953	0.473531	0.204458	0.179012	0.179825			628.6	0.302128	0.339324	0.328583	0.365462	0.266092	0.268667	0.2638	0.267804	0.28149	0.41157	0.380369	0.415436	0.219832	0.305186	0.257875	0.256714			628.6	0.175176	0.175918	0.131447	0.126319	0.217664	0.193681	0.15772	0.14221					628.6	0.26773	0.250608
628.8	0.227989	0.22887	0.230824	0.192144	0.190648	0.194096	0.447696	0.393371	0.471959	0.203657	0.178436	0.17878			628.8	0.300948	0.337913	0.327312	0.364093	0.265157	0.267831	0.262923	0.266761	0.280983	0.410108	0.379318	0.413892	0.219286	0.304103	0.256955	0.255688			628.8	0.174376	0.175116	0.1309	0.125744	0.216575	0.192876	0.157068	0.141621					628.8	0.266755	0.249541
629	0.226143	0.227145	0.22872	0.190585	0.189198	0.192498	0.444401	0.390079	0.468203	0.20202	0.177258	0.177208			629	0.298745	0.335258	0.32501	0.36148	0.263125	0.265834	0.260976	0.264645	0.278414	0.407216	0.376443	0.4105	0.217351	0.301702	0.25525	0.25315			629	0.172806	0.173616	0.129675	0.124608	0.21483	0.191226	0.155856	0.140157					629	0.264554	0.247762
629.2	0.224764	0.225677	0.227439	0.189579	0.18817	0.191447	0.442167	0.388235	0.465856	0.200936	0.176367	0.176525			629.2	0.297218	0.333647	0.323308	0.359735	0.261829	0.264496	0.259655	0.263285	0.276826	0.404841	0.37456	0.408721	0.216315	0.300254	0.253632	0.251951			629.2	0.171784	0.172534	0.128899	0.123848	0.2136	0.190194	0.154947	0.139407					629.2	0.263197	0.246503
629.4	0.223125	0.224264	0.225844	0.188352	0.186799	0.190333	0.439403	0.386217	0.462968	0.19909	0.175189	0.175558			629.4	0.295263	0.331613	0.321322	0.357278	0.260117	0.262878	0.257974	0.26169	0.275111	0.402315	0.372359	0.406106	0.214793	0.298375	0.251737	0.250382			629.4	0.17052	0.17119	0.128048	0.122888	0.212332	0.188798	0.153787	0.138482					629.4	0.261324	0.245005
629.6	0.22111	0.222175	0.223567	0.186755	0.185303	0.188815	0.435864	0.383668	0.459632	0.19705	0.172595	0.174512			629.6	0.292789	0.328986	0.31898	0.354752	0.257995	0.260946	0.255764	0.259695	0.272625	0.399261	0.369056	0.403103	0.213498	0.295604	0.24935	0.248296			629.6	0.169042	0.169696	0.126905	0.121706	0.210622	0.18741	0.15234	0.137333					629.6	0.259329	0.243246
629.8	0.220164	0.221247	0.222565	0.186059	0.184442	0.18823	0.434532	0.382317	0.457612	0.196558	0.171794	0.173808			629.8	0.29159	0.327742	0.317724	0.353461	0.256937	0.259916	0.254837	0.258677	0.271743	0.397683	0.367612	0.401429	0.213057	0.294695	0.248549	0.247375			629.8	0.168302	0.168872	0.126278	0.121235	0.209631	0.186653	0.15161	0.136806					629.8	0.258275	0.24222
630	0.218162	0.219319	0.220813	0.184741	0.18303	0.186672	0.431005	0.379992	0.455023	0.195186	0.170661	0.172641			630	0.289327	0.325346	0.315383	0.350751	0.255108	0.258087	0.252866	0.256761	0.269819	0.394612	0.365059	0.398762	0.211447	0.292608	0.246713	0.245365			630	0.166802	0.167434	0.125164	0.120269	0.20798	0.185189	0.150529	0.135355					630	0.256419	0.24028
630.2	0.217147	0.218076	0.219564	0.183746	0.182053	0.185693	0.428721	0.377968	0.452967	0.194346	0.169534	0.171432			630.2	0.287936	0.32365	0.313808	0.348894	0.253751	0.256891	0.251536	0.255422	0.268347	0.392872	0.36325	0.397074	0.210333	0.291051	0.245214	0.244026			630.2	0.165843	0.166481	0.124414	0.119528	0.206866	0.184242	0.149726	0.134582					630.2	0.255271	0.238857
630.4	0.215809	0.216642	0.218066	0.182347	0.180707	0.184537	0.426012	0.375227	0.450407	0.193616	0.168323	0.170088			630.4	0.286141	0.321711	0.311864	0.346706	0.25208	0.255348	0.24979	0.253826	0.266809	0.390706	0.360903	0.394742	0.209098	0.289272	0.24358	0.242472			630.4	0.164677	0.165205	0.1235	0.118631	0.205487	0.183091	0.148687	0.133511					630.4	0.253728	0.237454
630.6	0.214047	0.214992	0.216214	0.180855	0.179196	0.183049	0.423026	0.372601	0.446886	0.192278	0.167209	0.168459			630.6	0.284031	0.31926	0.309499	0.344199	0.250044	0.253261	0.247729	0.252029	0.264719	0.387975	0.358647	0.39196	0.207444	0.286632	0.241954	0.240242			630.6	0.163274	0.163838	0.122516	0.117512	0.203746	0.181501	0.147515	0.132392					630.6	0.251738	0.235899
630.8	0.212553	0.213659	0.214871	0.179744	0.178232	0.181998	0.420113	0.370533	0.444574	0.190852	0.166395	0.16737			630.8	0.28222	0.31731	0.30751	0.341997	0.248447	0.251593	0.246135	0.250479	0.262503	0.385696	0.356323	0.389466	0.205939	0.285066	0.240396	0.238227			630.8	0.162046	0.16258	0.121604	0.11666	0.20238	0.180212	0.146674	0.131415					630.8	0.25019	0.234399
631	0.211398	0.212524	0.213578	0.179007	0.177355	0.181125	0.4181	0.368887	0.442568	0.189707	0.165121	0.166624			631	0.280733	0.31575	0.305868	0.340419	0.247294	0.250249	0.244878	0.249274	0.260871	0.384234	0.354642	0.387768	0.204864	0.283518	0.239099	0.237018			631	0.161054	0.161645	0.12095	0.116036	0.201218	0.179187	0.145929	0.130638					631	0.24889	0.233227
631.2	0.209701	0.210934	0.211801	0.177709	0.176047	0.179682	0.414921	0.366229	0.439154	0.187313	0.163712	0.165286			631.2	0.278513	0.313284	0.303365	0.337596	0.245684	0.248488	0.242889	0.247291	0.259135	0.381677	0.352322	0.384352	0.202973	0.28123	0.237192	0.234802			631.2	0.15964	0.160265	0.119944	0.114995	0.199768	0.177656	0.14456	0.129507					631.2	0.246803	0.231537
631.4	0.208821	0.209938	0.211094	0.176965	0.175519	0.178973	0.413362	0.364974	0.437276	0.186451	0.16302	0.164411			631.4	0.277329	0.312144	0.302277	0.336092	0.244972	0.247571	0.241886	0.246319	0.257856	0.380307	0.351144	0.382793	0.202146	0.280082	0.236438	0.234015			631.4	0.158896	0.159651	0.119414	0.114475	0.199008	0.176829	0.144005	0.128935					631.4	0.245951	0.230598
631.6	0.20712	0.208146	0.209397	0.175569	0.174203	0.177331	0.410205	0.361867	0.433712	0.184925	0.161733	0.163032			631.6	0.275193	0.309949	0.299924	0.33383	0.24321	0.245626	0.239936	0.244521	0.256075	0.377524	0.34823	0.380155	0.200757	0.278025	0.234654	0.231976			631.6	0.157539	0.15822	0.118265	0.113438	0.197128	0.175393	0.142704	0.127872					631.6	0.244189	0.22856
631.8	0.206039	0.207057	0.208345	0.174606	0.1731	0.176276	0.408192	0.359978	0.431877	0.183747	0.1609	0.16227			631.8	0.273749	0.308241	0.298428	0.332198	0.241854	0.244366	0.238713	0.243441	0.254829	0.375488	0.346548	0.378394	0.199439	0.276481	0.2335	0.230245			631.8	0.156615	0.157377	0.117568	0.112738	0.195921	0.174462	0.141948	0.127239					631.8	0.243029	0.22752
632	0.204675	0.205731	0.206954	0.173421	0.171952	0.175152	0.40555	0.35764	0.429124	0.182227	0.160081	0.161395			632	0.272115	0.306199	0.296491	0.330143	0.240214	0.242689	0.237158	0.242089	0.253021	0.373	0.344312	0.376144	0.197642	0.274702	0.232045	0.228542			632	0.155553	0.156276	0.116663	0.111978	0.194572	0.173266	0.140989	0.126474					632	0.241557	0.226241
632.2	0.203013	0.20399	0.205385	0.171943	0.170644	0.173796	0.402675	0.354752	0.426613	0.180612	0.159344	0.159802			632.2	0.270117	0.303724	0.294253	0.327757	0.238299	0.240797	0.235257	0.240273	0.251323	0.370504	0.341655	0.373386	0.196154	0.272631	0.230225	0.227151			632.2	0.154269	0.154894	0.115624	0.111042	0.193047	0.171868	0.139852	0.125274					632.2	0.239658	0.224608
632.4	0.202235	0.203466	0.204696	0.171226	0.169937	0.173204	0.401641	0.353337	0.424963	0.180258	0.159005	0.159603			632.4	0.269197	0.302495	0.293136	0.32659	0.237397	0.239953	0.234321	0.239455	0.250545	0.368947	0.340378	0.371707	0.19574	0.271622	0.22965	0.22669			632.4	0.153679	0.154274	0.115097	0.110593	0.192208	0.171146	0.139291	0.1248					632.4	0.238874	0.223632
632.6	0.200929	0.20171	0.203333	0.169697	0.168618	0.171779	0.399075	0.350595	0.421456	0.179357	0.157845	0.157939			632.6	0.267146	0.300271	0.290868	0.324325	0.235598	0.238115	0.23248	0.237394	0.248527	0.366033	0.337622	0.368973	0.194312	0.269596	0.228032	0.224733			632.6	0.15236	0.15304	0.114022	0.109641	0.190523	0.169609	0.137889	0.123721					632.6	0.237186	0.222035
632.8	0.199933	0.200814	0.202453	0.168764	0.167714	0.170803	0.397367	0.348834	0.419963	0.178904	0.157275	0.156722			632.8	0.26589	0.298913	0.289448	0.322483	0.234465	0.236896	0.231301	0.236084	0.247541	0.363854	0.33627	0.367558	0.193375	0.268139	0.226945	0.223299			632.8	0.151464	0.152142	0.1134	0.109056	0.189377	0.168636	0.136952	0.122925					632.8	0.236049	0.220776
633	0.198699	0.19942	0.201322	0.16766	0.166632	0.169479	0.394812	0.346906	0.418049	0.177466	0.156718	0.155292			633	0.264431	0.297078	0.28767	0.320359	0.233107	0.235296	0.22983	0.234515	0.246091	0.361422	0.334303	0.365749	0.192035	0.266229	0.225506	0.221629			633	0.150364	0.151016	0.11265	0.108309	0.188073	0.16754	0.135816	0.122025					633	0.234934	0.219214
633.2	0.197183	0.198033	0.199765	0.166312	0.165398	0.168061	0.392507	0.344293	0.414955	0.175526	0.155418	0.153905			633.2	0.262586	0.29472	0.285463	0.318016	0.23106	0.233398	0.228104	0.232788	0.244553	0.358743	0.331543	0.362871	0.1902	0.263889	0.223836	0.220277			633.2	0.149069	0.149617	0.111638	0.10734	0.186558	0.166269	0.134545	0.121001					633.2	0.233179	0.217726
633.4	0.195643	0.19665	0.19853	0.1651	0.164068	0.166853	0.390351	0.342366	0.41196	0.174298	0.154778	0.152668			633.4	0.260818	0.292818	0.283576	0.316121	0.229616	0.231824	0.226621	0.231394	0.242866	0.356708	0.32939	0.360079	0.188932	0.26228	0.222496	0.219063			633.4	0.147954	0.148577	0.110836	0.106575	0.185388	0.164888	0.133477	0.120255					633.4	0.231708	0.216457
633.6	0.194535	0.19559	0.19762	0.164219	0.163195	0.165959	0.388504	0.341123	0.409819	0.173082	0.154092	0.151956			633.6	0.259463	0.291215	0.282044	0.314523	0.228415	0.230521	0.225561	0.2302	0.241675	0.354985	0.327939	0.358113	0.187752	0.260667	0.221104	0.217883			633.6	0.147072	0.147684	0.11021	0.105962	0.184322	0.163951	0.132673	0.119651					633.6	0.230448	0.215386
633.8	0.192887	0.194093	0.195996	0.162993	0.161709	0.16455	0.385834	0.339279	0.406747	0.171915	0.152895	0.151274			633.8	0.257564	0.289085	0.279816	0.312108	0.226673	0.228994	0.223892	0.22835	0.239607	0.352324	0.325369	0.355402	0.186919	0.258901	0.21934	0.216209			633.8	0.145793	0.146375	0.109231	0.105088	0.182764	0.162619	0.131416	0.118727					633.8	0.22878	0.213813
634	0.192089	0.19309	0.195045	0.162257	0.160962	0.163784	0.384855	0.338216	0.405367	0.170915	0.152056	0.150847			634	0.256536	0.287976	0.278844	0.310992	0.225779	0.227995	0.222991	0.227427	0.238836	0.351115	0.324489	0.354237	0.186462	0.257813	0.218559	0.21558			634	0.145243	0.145776	0.108827	0.104609	0.182011	0.16207	0.130759	0.118315					634	0.227924	0.213031
634.2	0.190407	0.191565	0.193547	0.160787	0.15949	0.162272	0.382494	0.336666	0.402913	0.169842	0.151492	0.150299			634.2	0.25458	0.285634	0.276824	0.308641	0.223984	0.226289	0.221237	0.225572	0.236746	0.348575	0.322407	0.351541	0.184957	0.255917	0.216945	0.213954			634.2	0.144031	0.144573	0.107781	0.103568	0.180872	0.160713	0.129445	0.117522					634.2	0.22621	0.211439
634.4	0.189337	0.190556	0.192373	0.159936	0.158667	0.161296	0.380918	0.335269	0.401013	0.169278	0.150589	0.149545			634.4	0.253507	0.284313	0.275552	0.307116	0.222821	0.225163	0.220128	0.224472	0.235688	0.346691	0.320821	0.350039	0.183931	0.254338	0.215882	0.212736			634.4	0.143239	0.143699	0.107195	0.102979	0.179831	0.159837	0.128635	0.116812					634.4	0.225295	0.210349
634.6	0.187937	0.189554	0.190931	0.158857	0.157739	0.159987	0.378895	0.333406	0.398929	0.168504	0.149616	0.14862			634.6	0.25203	0.282711	0.273926	0.305311	0.221312	0.2238	0.218931	0.223061	0.234579	0.34436	0.318819	0.34801	0.182967	0.252581	0.214324	0.211057			634.6	0.142253	0.142628	0.106363	0.10229	0.178591	0.15886	0.127589	0.11585					634.6	0.224047	0.209165
634.8	0.186502	0.188145	0.189319	0.15747	0.15656	0.158781	0.376523	0.331529	0.396369	0.167243	0.148437	0.147461			634.8	0.250145	0.280469	0.271814	0.302918	0.219501	0.222155	0.217349	0.221503	0.233025	0.341803	0.316903	0.345166	0.181461	0.250698	0.212591	0.20956			634.8	0.140986	0.141388	0.105513	0.101401	0.17753	0.157581	0.126483	0.114862					634.8	0.222336	0.207999
635	0.185827	0.187646	0.188552	0.156834	0.155955	0.158158	0.375412	0.330735	0.39506	0.166624	0.147746	0.146842			635	0.249255	0.279613	0.270772	0.301763	0.218835	0.221176	0.216511	0.220578	0.232038	0.340585	0.31567	0.343995	0.18107	0.249811	0.211663	0.208989			635	0.140342	0.140754	0.105099	0.100984	0.17674	0.156994	0.125866	0.114328					635	0.221408	0.207348
635.2	0.184244	0.185986	0.187064	0.155645	0.154707	0.156913	0.373532	0.328929	0.391574	0.165585	0.145709	0.145156			635.2	0.247084	0.277594	0.268705	0.299617	0.217025	0.219564	0.214802	0.218797	0.23061	0.337949	0.313477	0.341165	0.179951	0.24764	0.20995	0.207589			635.2	0.139099	0.13953	0.104261	0.100097	0.175608	0.155591	0.124573	0.113252					635.2	0.219632	0.20559
635.4	0.183229	0.18498	0.18612	0.154814	0.153917	0.15601	0.371973	0.32745	0.389405	0.164617	0.144396	0.144616			635.4	0.245897	0.276218	0.267238	0.298093	0.215877	0.218447	0.213714	0.217609	0.229463	0.336044	0.311947	0.3394	0.17914	0.246301	0.208621	0.206428			635.4	0.138209	0.138691	0.103717	0.099484	0.174519	0.154742	0.123686	0.112795					635.4	0.218742	0.204422
635.6	0.181985	0.183682	0.18483	0.153801	0.152863	0.154874	0.369684	0.325983	0.387086	0.163323	0.143077	0.143648			635.6	0.244364	0.274521	0.265544	0.29615	0.214483	0.217042	0.212371	0.215998	0.227594	0.33407	0.310301	0.337208	0.177895	0.244687	0.207091	0.204912			635.6	0.137152	0.137662	0.102974	0.0987386	0.17339	0.153826	0.122653	0.112059					635.6	0.217428	0.203205
635.8	0.18034	0.182304	0.183213	0.152631	0.151744	0.153571	0.366698	0.323511	0.384639	0.161609	0.141914	0.143044			635.8	0.242379	0.272349	0.263701	0.293753	0.212734	0.215371	0.210802	0.214512	0.225704	0.331812	0.308255	0.334492	0.176037	0.242784	0.205649	0.203727			635.8	0.135935	0.136425	0.102217	0.0979133	0.172037	0.15267	0.12174	0.111167					635.8	0.215728	0.201702
636	0.179451	0.181261	0.182127	0.151889	0.15093	0.152693	0.365249	0.322204	0.382299	0.160211	0.140934	0.142254			636	0.241152	0.271025	0.262145	0.29242	0.211748	0.214314	0.209787	0.213486	0.224573	0.330442	0.306653	0.332665	0.175072	0.241618	0.204697	0.202504			636	0.135239	0.135644	0.10161	0.0973229	0.1712	0.151912	0.121071	0.11057					636	0.214676	0.200898
636.2	0.178194	0.180041	0.180761	0.150851	0.149967	0.15155	0.364005	0.32059	0.379852	0.159332	0.139533	0.141635			636.2	0.239643	0.269404	0.26029	0.290682	0.210545	0.213036	0.20842	0.21214	0.223316	0.328433	0.304758	0.330314	0.17419	0.240037	0.203271	0.201036			636.2	0.13432	0.13475	0.100819	0.0965761	0.170243	0.150868	0.120208	0.109976					636.2	0.213178	0.199796
636.4	0.176738	0.178417	0.179195	0.149641	0.14867	0.15037	0.361125	0.318707	0.37717	0.158646	0.138101	0.140405			636.4	0.237774	0.267384	0.258328	0.288325	0.208989	0.211407	0.206687	0.210436	0.221436	0.326093	0.302624	0.328156	0.173015	0.238325	0.201504	0.1993			636.4	0.133155	0.133685	0.100019	0.0957452	0.168692	0.149565	0.119208	0.109021					636.4	0.211634	0.198342
636.6	0.176064	0.177881	0.178498	0.149101	0.14812	0.149689	0.359969	0.317766	0.376445	0.158038	0.13736	0.139793			636.6	0.237102	0.266392	0.257508	0.287182	0.208241	0.210653	0.205978	0.20962	0.220654	0.324958	0.301387	0.32746	0.172326	0.237247	0.200458	0.198335			636.6	0.132637	0.133075	0.099601	0.0953156	0.167935	0.149006	0.118593	0.108523					636.6	0.210695	0.197839
636.8	0.174544	0.176478	0.176905	0.147888	0.146957	0.148635	0.357349	0.315921	0.374062	0.157003	0.136036	0.138356			636.8	0.235271	0.264255	0.255551	0.284944	0.20667	0.209104	0.204372	0.208043	0.218807	0.322648	0.299067	0.325297	0.171294	0.235896	0.1994	0.196527			636.8	0.131539	0.131989	0.0987189	0.0944285	0.166626	0.147793	0.11777	0.107398					636.8	0.209185	0.19639
637	0.173617	0.175442	0.175768	0.147133	0.146175	0.147821	0.355972	0.314685	0.372703	0.15612	0.135039	0.137161			637	0.234059	0.262948	0.254316	0.283504	0.205694	0.207902	0.203178	0.207001	0.217886	0.3211	0.297525	0.323738	0.170442	0.234449	0.198145	0.195424			637	0.130863	0.131219	0.0981678	0.0939461	0.165828	0.147125	0.116978	0.106734					637	0.208242	0.195366
637.2	0.172423	0.174316	0.174618	0.146135	0.14524	0.146868	0.354452	0.312982	0.370505	0.155112	0.134193	0.135943			637.2	0.232572	0.261371	0.252466	0.281617	0.204453	0.206625	0.201802	0.205567	0.216635	0.31923	0.29553	0.321622	0.169068	0.232683	0.196689	0.194434			637.2	0.129934	0.130232	0.0973914	0.0932463	0.164785	0.146051	0.116111	0.105947					637.2	0.207039	0.194105
637.4	0.171272	0.172976	0.173135	0.14493	0.144331	0.14575	0.35234	0.310599	0.368009	0.153836	0.132828	0.134344			637.4	0.231095	0.259571	0.250528	0.27945	0.202675	0.204994	0.200381	0.204268	0.21562	0.31662	0.293421	0.319205	0.16828	0.231043	0.195186	0.192838			637.4	0.128852	0.129014	0.0965594	0.0924858	0.163436	0.144977	0.11528	0.104868					637.4	0.205404	0.192606
637.6	0.170388	0.171957	0.172295	0.144134	0.143405	0.145171	0.351096	0.308864	0.366743	0.152725	0.132258	0.133993			637.6	0.229855	0.25807	0.249162	0.278071	0.20161	0.203892	0.199384	0.203241	0.214413	0.315346	0.292056	0.317732	0.167437	0.230011	0.194242	0.192409			637.6	0.128096	0.12832	0.0959138	0.0919485	0.162628	0.144357	0.114628	0.104419					637.6	0.204297	0.191653
637.8	0.169306	0.170514	0.171167	0.143081	0.142301	0.144371	0.349448	0.30725	0.365377	0.151651	0.131372	0.133403			637.8	0.228437	0.256249	0.24748	0.276373	0.200275	0.202518	0.198151	0.201926	0.213084	0.313798	0.2903	0.316134	0.166443	0.228762	0.193131	0.191378			637.8	0.127109	0.127373	0.0952583	0.0912336	0.161638	0.143516	0.113743	0.103909					637.8	0.202884	0.190444
638	0.167951	0.169049	0.16977	0.141845	0.141107	0.143039	0.347535	0.305533	0.363961	0.150593	0.130353	0.132205			638	0.226675	0.254269	0.245554	0.274487	0.198667	0.200797	0.196663	0.200254	0.211039	0.311732	0.288309	0.314048	0.16503	0.226892	0.191592	0.18987			638	0.12611	0.126343	0.0944177	0.0904633	0.160236	0.142502	0.1127	0.103078					638	0.201473	0.188866
638.2	0.167257	0.168144	0.169006	0.141324	0.140542	0.142618	0.346429	0.304176	0.36283	0.150022	0.129833	0.131555			638.2	0.225825	0.253172	0.244686	0.27333	0.197988	0.20015	0.195758	0.1996	0.210692	0.310718	0.28733	0.313045	0.164411	0.225803	0.19077	0.189139			638.2	0.125638	0.125719	0.094023	0.0900306	0.159647	0.141904	0.112073	0.102693					638.2	0.200772	0.188171
638.4	0.165899	0.166957	0.16763	0.140141	0.139387	0.141639	0.343781	0.302542	0.361244	0.14892	0.129286	0.130949			638.4	0.224347	0.251352	0.242807	0.271181	0.196408	0.198607	0.194174	0.19805	0.20917	0.308683	0.285081	0.311016	0.162975	0.224218	0.189329	0.187459			638.4	0.124474	0.12467	0.0931719	0.0892229	0.158394	0.140871	0.111152	0.10176					638.4	0.199324	0.186814
638.6	0.165039	0.166015	0.166626	0.139387	0.13855	0.140868	0.342249	0.301578	0.359815	0.148503	0.128411	0.13054			638.6	0.223072	0.250109	0.241698	0.269864	0.19536	0.197588	0.193173	0.197056	0.208051	0.307375	0.283703	0.309491	0.162196	0.223093	0.188498	0.186713			638.6	0.123831	0.123965	0.092536	0.0886977	0.157721	0.140055	0.110484	0.101135					638.6	0.198132	0.185949
638.8	0.163926	0.164674	0.165435	0.138372	0.137784	0.13984	0.340618	0.300013	0.3582	0.147274	0.127273	0.129701			638.8	0.221484	0.248471	0.24019	0.268175	0.193941	0.196303	0.191901	0.19592	0.206943	0.305608	0.281778	0.307773	0.161058	0.221464	0.187416	0.185538			638.8	0.122937	0.123141	0.0917988	0.0880536	0.156621	0.139065	0.109586	0.10044					638.8	0.196676	0.184802
639	0.162492	0.163182	0.164295	0.137282	0.136646	0.138709	0.339015	0.298841	0.355959	0.146158	0.125853	0.128357			639	0.219894	0.246503	0.238266	0.26609	0.192646	0.194824	0.190487	0.194269	0.205923	0.303395	0.279903	0.305495	0.160249	0.219738	0.186053	0.184114			639	0.121876	0.122075	0.0909399	0.0872121	0.155475	0.13783	0.108594	0.0995529					639	0.195008	0.183279
639.2	0.16145	0.162362	0.163361	0.136504	0.135962	0.138026	0.337423	0.297609	0.354565	0.145341	0.125108	0.127639			639.2	0.218739	0.2452	0.237149	0.264769	0.191504	0.193751	0.189437	0.193188	0.204859	0.301875	0.278529	0.303993	0.159164	0.218588	0.185013	0.183126			639.2	0.121127	0.12137	0.0903582	0.0866784	0.154602	0.137208	0.107994	0.0989254					639.2	0.193916	0.182286
639.4	0.160358	0.161365	0.162151	0.135588	0.135068	0.137194	0.335338	0.295793	0.352623	0.144419	0.124038	0.126157			639.4	0.217185	0.243505	0.235812	0.263066	0.190062	0.192408	0.188209	0.191924	0.203684	0.30018	0.276889	0.302257	0.157688	0.21707	0.183827	0.181911			639.4	0.120233	0.120429	0.0896893	0.086045	0.153371	0.136363	0.107206	0.0979846					639.4	0.192476	0.181259
639.6	0.158742	0.159911	0.160578	0.134431	0.133995	0.135964	0.333469	0.294023	0.350404	0.143212	0.122847	0.12479			639.6	0.215406	0.241631	0.23396	0.261077	0.188533	0.190823	0.186776	0.190454	0.202372	0.297826	0.275143	0.300117	0.156441	0.215174	0.182213	0.180331			639.6	0.119163	0.119325	0.0888253	0.0852008	0.152347	0.135388	0.106029	0.097344					639.6	0.190735	0.179553
639.8	0.15815	0.159051	0.15982	0.133794	0.13343	0.135433	0.332535	0.292853	0.349102	0.14274	0.122044	0.124602			639.8	0.214407	0.240553	0.232996	0.260061	0.187699	0.189941	0.185907	0.189722	0.201628	0.296753	0.274359	0.298707	0.156053	0.214312	0.181609	0.1795			639.8	0.118619	0.118772	0.0883562	0.0847983	0.151762	0.134933	0.105528	0.0969664					639.8	0.190253	0.178803
640	0.156775	0.15755	0.158485	0.132918	0.132354	0.134199	0.330456	0.290504	0.347516	0.141519	0.121062	0.123783			640	0.212835	0.238773	0.231265	0.258219	0.186285	0.188473	0.184407	0.188273	0.200327	0.294605	0.272544	0.296846	0.154758	0.212162	0.17984	0.178242			640	0.117612	0.117759	0.0875179	0.084105	0.15059	0.133899	0.10453	0.0962728					640	0.188763	0.177511
640.2	0.155892	0.15667	0.157699	0.132106	0.131484	0.133483	0.328934	0.288696	0.3463	0.140772	0.120571	0.123316			640.2	0.211639	0.237537	0.230178	0.256843	0.185269	0.1876	0.18353	0.187108	0.199217	0.293069	0.271155	0.295296	0.153544	0.211371	0.179095	0.177423			640.2	0.116845	0.117134	0.0870136	0.0835621	0.149705	0.133171	0.103987	0.0957466					640.2	0.187752	0.176726
640.4	0.154824	0.155562	0.156498	0.131178	0.130405	0.132596	0.326974	0.286742	0.34514	0.140088	0.11973	0.122437			640.4	0.210356	0.235885	0.228816	0.255124	0.183952	0.186343	0.182312	0.185853	0.197781	0.291033	0.269454	0.293709	0.15246	0.210104	0.177928	0.176025			640.4	0.115953	0.116307	0.0863883	0.0829659	0.148606	0.132355	0.103309	0.09499					640.4	0.186534	0.175696
640.6	0.153426	0.154128	0.155259	0.13	0.1292	0.131376	0.324691	0.285193	0.342807	0.139282	0.11854	0.121264			640.6	0.208541	0.233874	0.22693	0.253177	0.182583	0.184822	0.180702	0.184193	0.196227	0.28915	0.26734	0.291444	0.150774	0.208148	0.176735	0.174432			640.6	0.114893	0.115306	0.0856792	0.0822013	0.147164	0.131254	0.10215	0.0942602					640.6	0.185203	0.174422
640.8	0.152487	0.153239	0.154418	0.129205	0.128516	0.130581	0.323221	0.28442	0.341577	0.1385	0.117653	0.120246			640.8	0.207312	0.232798	0.225667	0.251791	0.18154	0.183924	0.179683	0.183124	0.195157	0.287834	0.266073	0.289962	0.149823	0.206998	0.175714	0.173041			640.8	0.114267	0.114574	0.0851878	0.0816971	0.146362	0.130473	0.101556	0.0936254					640.8	0.184067	0.17357
641	0.151341	0.15235	0.153256	0.128311	0.127732	0.129616	0.321373	0.282883	0.339606	0.137531	0.116686	0.119525			641	0.205787	0.2314	0.224129	0.250072	0.180184	0.182827	0.178324	0.181953	0.19369	0.28599	0.2644	0.288043	0.148675	0.205493	0.174541	0.17196			641	0.113498	0.113664	0.084505	0.0810838	0.145352	0.129588	0.100902	0.0929039					641	0.182803	0.172605
641.2	0.15002	0.151161	0.151936	0.127396	0.126599	0.128808	0.319569	0.280741	0.336918	0.136721	0.115337	0.119065			641.2	0.204117	0.229628	0.222489	0.247929	0.178759	0.181309	0.176924	0.180483	0.192559	0.28394	0.262483	0.285818	0.14779	0.203729	0.173229	0.170632			641.2	0.112426	0.112562	0.0837392	0.0803052	0.144131	0.128448	0.0999552	0.0920099					641.2	0.1813	0.171594
641.4	0.149361	0.150551	0.151308	0.126825	0.126112	0.12815	0.31853	0.280157	0.335488	0.136349	0.114711	0.118728			641.4	0.20334	0.228672	0.221535	0.247058	0.178022	0.180599	0.17634	0.179766	0.191621	0.283025	0.261487	0.2847	0.14705	0.202904	0.172683	0.170075			641.4	0.111911	0.112108	0.0832961	0.0799379	0.143559	0.127991	0.0995291	0.0916691					641.4	0.180626	0.171054
641.6	0.14817	0.149208	0.149919	0.125938	0.125016	0.126827	0.316243	0.278236	0.332884	0.13512	0.113333	0.11779			641.6	0.201703	0.226762	0.219828	0.245156	0.176506	0.179084	0.174888	0.178288	0.189649	0.281312	0.259552	0.282066	0.145836	0.201116	0.171236	0.169043			641.6	0.111055	0.111036	0.0825444	0.0792255	0.14235	0.126909	0.0985286	0.0909868					641.6	0.179218	0.169575
641.8	0.147355	0.148389	0.149154	0.125229	0.124322	0.126097	0.314934	0.276844	0.331625	0.134249	0.112776	0.116953			641.8	0.200696	0.225631	0.218537	0.243794	0.175554	0.178142	0.173941	0.177266	0.188753	0.279936	0.258075	0.281006	0.144862	0.199919	0.170319	0.167956			641.8	0.110418	0.110412	0.0821083	0.0787339	0.141485	0.126359	0.0979601	0.0904406					641.8	0.17834	0.168711
642	0.146268	0.147435	0.148096	0.124392	0.123382	0.125275	0.313157	0.275133	0.329876	0.133467	0.112292	0.115986			642	0.199417	0.22419	0.217029	0.242151	0.174394	0.176936	0.172731	0.176019	0.187609	0.278304	0.2565	0.279347	0.14394	0.198629	0.169397	0.166579			642	0.109661	0.109532	0.0815124	0.0781369	0.140636	0.125463	0.097398	0.0896649					642	0.177328	0.167668
642.2	0.145069	0.146262	0.146673	0.123272	0.1224	0.124266	0.31097	0.272858	0.327514	0.132416	0.111351	0.114853			642.2	0.197731	0.22242	0.215236	0.240144	0.172897	0.175489	0.171207	0.174599	0.18566	0.27642	0.254204	0.277452	0.142594	0.196908	0.167863	0.164832			642.2	0.108718	0.108587	0.0808165	0.0774766	0.139382	0.124614	0.0966835	0.0890042					642.2	0.176098	0.166411
642.4	0.144286	0.145329	0.145878	0.122587	0.12163	0.123529	0.309545	0.271703	0.326333	0.132022	0.110874	0.114274			642.4	0.196641	0.22121	0.214097	0.238818	0.171998	0.174537	0.170315	0.173689	0.184741	0.275249	0.252874	0.275811	0.142052	0.195809	0.167076	0.16414			642.4	0.108096	0.107927	0.0804068	0.0770011	0.138725	0.123789	0.0961164	0.0885718					642.4	0.175072	0.165559
642.6	0.143294	0.144153	0.144989	0.121655	0.120756	0.122761	0.307502	0.270567	0.324626	0.130979	0.110216	0.114161			642.6	0.19529	0.219803	0.212538	0.237198	0.170719	0.173433	0.169255	0.172472	0.183266	0.27372	0.251437	0.273864	0.141211	0.194658	0.166141	0.163291			642.6	0.107303	0.107181	0.0798539	0.0763981	0.137933	0.122856	0.0954428	0.0881037					642.6	0.173865	0.164359
642.8	0.142272	0.143135	0.14414	0.120536	0.11967	0.12164	0.305171	0.268256	0.323196	0.129971	0.109607	0.11362			642.8	0.193884	0.218072	0.21094	0.235386	0.169408	0.172042	0.167853	0.171118	0.181918	0.271703	0.249403	0.271815	0.140299	0.19297	0.164848	0.161885			642.8	0.10646	0.106219	0.0791842	0.0757763	0.136587	0.121917	0.0945736	0.0872181					642.8	0.172662	0.163528
643	0.141502	0.142638	0.143647	0.120139	0.119275	0.121115	0.304208	0.267729	0.322364	0.129374	0.109309	0.113014			643	0.193118	0.217256	0.210148	0.234494	0.168644	0.171434	0.167192	0.170288	0.181046	0.270697	0.248728	0.271024	0.139626	0.192076	0.16393	0.161304			643	0.10603	0.105793	0.0788795	0.0754285	0.136056	0.121458	0.0941402	0.086797					643	0.171775	0.162839
643.2	0.140352	0.141602	0.142435	0.118924	0.118258	0.120131	0.302934	0.26603	0.31969	0.1282	0.108747	0.112046			643.2	0.191687	0.215473	0.208394	0.232479	0.167352	0.169968	0.16583	0.168913	0.179709	0.268643	0.246764	0.268664	0.138048	0.190759	0.162749	0.1602			643.2	0.105015	0.104777	0.0783052	0.0746947	0.134904	0.120395	0.0933882	0.0860689					643.2	0.170434	0.161489
643.4	0.139649	0.140897	0.141564	0.118257	0.117764	0.11946	0.301514	0.265106	0.318234	0.127397	0.10817	0.111456			643.4	0.190736	0.214316	0.207255	0.23119	0.166439	0.16902	0.164993	0.168205	0.178899	0.267354	0.245641	0.267384	0.137528	0.189793	0.162011	0.159179			643.4	0.104423	0.104137	0.0778191	0.0742021	0.134216	0.119726	0.0928853	0.0856555					643.4	0.169612	0.160616
643.6	0.138802	0.140012	0.140564	0.117442	0.117049	0.11846	0.299866	0.263495	0.31615	0.126317	0.107181	0.110635			643.6	0.189386	0.212768	0.205945	0.229689	0.165425	0.167831	0.163945	0.167273	0.178237	0.265743	0.244195	0.265509	0.136628	0.188417	0.160911	0.157934			643.6	0.103626	0.103355	0.0772348	0.0736125	0.133295	0.118867	0.0920079	0.0851554					643.6	0.168457	0.159721
643.8	0.137838	0.138668	0.139348	0.116562	0.116061	0.117546	0.298051	0.261595	0.314497	0.125035	0.106312	0.109636			643.8	0.188036	0.211096	0.204363	0.22774	0.164122	0.166536	0.162631	0.165841	0.176593	0.263839	0.242376	0.263828	0.135477	0.186952	0.15914	0.156474			643.8	0.102728	0.102434	0.0764125	0.0729066	0.132253	0.118006	0.0912228	0.0843221					643.8	0.167032	0.158589
644	0.137061	0.137892	0.13851	0.115996	0.11544	0.116863	0.296742	0.260266	0.312914	0.124659	0.105893	0.108833			644	0.187168	0.209979	0.203342	0.226637	0.163261	0.165558	0.161747	0.164935	0.175729	0.262262	0.241054	0.262602	0.134897	0.186099	0.158433	0.155692			644	0.102123	0.101847	0.0759895	0.0724737	0.131473	0.117464	0.0906638	0.0838796					644	0.166221	0.157736
644.2	0.136126	0.136851	0.137499	0.115225	0.114535	0.116028	0.295286	0.259084	0.310755	0.123886	0.105297	0.107732			644.2	0.185948	0.208499	0.202029	0.225133	0.162154	0.164369	0.160581	0.163697	0.174779	0.260433	0.239624	0.260801	0.133989	0.184893	0.157465	0.154643			644.2	0.101372	0.101119	0.0754819	0.0719318	0.130704	0.116658	0.0899513	0.0832562					644.2	0.165089	0.15651
644.4	0.135011	0.135549	0.13651	0.114295	0.113599	0.114994	0.292875	0.257201	0.308726	0.122504	0.10473	0.106182			644.4	0.18452	0.20685	0.200425	0.223551	0.160844	0.163013	0.159234	0.162293	0.173196	0.258285	0.237447	0.258804	0.132583	0.183472	0.156228	0.153032			644.4	0.100499	0.100286	0.0748286	0.0712906	0.129618	0.115754	0.0891966	0.0824956					644.4	0.163624	0.155055
644.6	0.134429	0.135096	0.13591	0.113774	0.113015	0.114556	0.291992	0.256341	0.307745	0.121897	0.104308	0.105443			644.6	0.183729	0.206087	0.199688	0.222659	0.160135	0.162268	0.158548	0.161639	0.172574	0.257496	0.236689	0.25785	0.132011	0.182715	0.155467	0.152111			644.6	0.100064	0.0998189	0.0744836	0.0709643	0.129193	0.115145	0.088896	0.0821079					644.6	0.162892	0.154406
644.8	0.133191	0.133924	0.134607	0.112586	0.112194	0.113745	0.290561	0.254328	0.305941	0.120892	0.103661	0.103881			644.8	0.182135	0.204507	0.198219	0.220515	0.158972	0.160962	0.157413	0.160285	0.171859	0.255447	0.234966	0.256609	0.130938	0.181114	0.154245	0.150669			644.8	0.0992019	0.0989503	0.0738676	0.0703021	0.128129	0.114288	0.0882163	0.0812617					644.8	0.161481	0.153492
645	0.132454	0.133174	0.133883	0.111946	0.111584	0.11319	0.289174	0.253389	0.304747	0.120331	0.103462	0.103506			645	0.181126	0.203385	0.197216	0.219349	0.158188	0.160125	0.156523	0.159454	0.170972	0.253896	0.233965	0.255137	0.130092	0.180371	0.153646	0.149945			645	0.098557	0.0983582	0.0733859	0.0698991	0.127433	0.113693	0.087797	0.080883					645	0.160634	0.152628
645.2	0.131564	0.13217	0.132975	0.111136	0.110879	0.112454	0.287562	0.251971	0.302845	0.119598	0.102875	0.102998			645.2	0.179893	0.202147	0.196054	0.217925	0.157174	0.159103	0.155352	0.158391	0.169883	0.252032	0.232571	0.253212	0.128953	0.179003	0.152395	0.148731			645.2	0.0977864	0.097618	0.0728595	0.0694151	0.126343	0.112968	0.0870077	0.0803342					645.2	0.159623	0.151767
645.4	0.130522	0.130921	0.131712	0.110381	0.109764	0.111647	0.285746	0.250608	0.301502	0.118478	0.101894	0.102351			645.4	0.178637	0.200533	0.194622	0.216261	0.155923	0.157709	0.154015	0.157142	0.169054	0.25025	0.231009	0.251366	0.127797	0.177496	0.151188	0.147592			645.4	0.0970078	0.0967907	0.0721481	0.0687851	0.125351	0.112158	0.0860087	0.0797205					645.4	0.158598	0.150866
645.6	0.129711	0.130239	0.130987	0.109763	0.109131	0.111025	0.284455	0.249512	0.299918	0.117722	0.101208	0.101722			645.6	0.177687	0.19946	0.193584	0.215176	0.155017	0.156913	0.153193	0.156239	0.168207	0.249006	0.230042	0.250293	0.126877	0.176545	0.150317	0.146838			645.6	0.0964427	0.0962124	0.0717109	0.0683835	0.124669	0.111606	0.0854489	0.0792262					645.6	0.157894	0.150078
645.8	0.128696	0.129446	0.129985	0.10902	0.108317	0.110161	0.283004	0.247886	0.298489	0.1169	0.10064	0.100605			645.8	0.176611	0.198051	0.192409	0.213732	0.154054	0.155816	0.15202	0.155193	0.167091	0.247496	0.228456	0.248792	0.125865	0.175392	0.149452	0.14585			645.8	0.0957235	0.0954528	0.0712057	0.0678523	0.123754	0.111008	0.0847996	0.0786098					645.8	0.156927	0.149184
646	0.127681	0.128059	0.128911	0.108203	0.10754	0.109326	0.2818	0.247074	0.296243	0.11592	0.0995017	0.0997593			646	0.175118	0.196595	0.190743	0.212085	0.152733	0.154657	0.150822	0.153878	0.165637	0.246153	0.227192	0.246457	0.124717	0.173859	0.148225	0.145029			646	0.0948332	0.0946454	0.0705642	0.0672085	0.122878	0.110023	0.0839574	0.0780334					646	0.15587	0.14808
646.2	0.127265	0.127438	0.128352	0.107752	0.106949	0.10886	0.280932	0.246099	0.295056	0.11539	0.098908	0.0993852			646.2	0.1744	0.195925	0.189808	0.211221	0.152148	0.153969	0.150181	0.153247	0.165059	0.245143	0.226306	0.245312	0.124123	0.173182	0.147786	0.144475			646.2	0.0943771	0.0942058	0.0702498	0.0669287	0.122446	0.109525	0.0835869	0.0776829					646.2	0.155181	0.147519
646.4	0.126243	0.126291	0.12722	0.106896	0.1059	0.107846	0.278956	0.244472	0.293315	0.114578	0.0975771	0.0983275			646.4	0.172979	0.19451	0.188494	0.209554	0.150824	0.152636	0.148898	0.151986	0.163496	0.243382	0.224589	0.243394	0.123169	0.171751	0.146303	0.143104			646.4	0.0936116	0.0933904	0.0694987	0.0663399	0.121393	0.108728	0.0827256	0.0770047					646.4	0.154089	0.146463
646.6	0.125404	0.125543	0.126516	0.106333	0.105291	0.107211	0.277695	0.243268	0.291794	0.114	0.097239	0.0978516			646.6	0.171966	0.193517	0.187493	0.208438	0.149967	0.151779	0.14804	0.151135	0.162652	0.242182	0.223447	0.24208	0.122538	0.170801	0.145493	0.14248			646.6	0.0930262	0.0928118	0.0690719	0.0659571	0.120814	0.108112	0.0823202	0.0765218					646.6	0.153294	0.145779
646.8	0.124387	0.124627	0.125609	0.105533	0.104543	0.106494	0.275908	0.242209	0.289823	0.113358	0.0968176	0.0974149			646.8	0.170852	0.192442	0.186304	0.207099	0.148757	0.150866	0.146947	0.149977	0.161135	0.24061	0.221971	0.240473	0.121611	0.16999	0.144729	0.141648			646.8	0.0923392	0.092132	0.0685319	0.0654319	0.120091	0.107375	0.0819299	0.0759575					646.8	0.152146	0.144758
647	0.123138	0.123779	0.124509	0.104658	0.103706	0.105643	0.273711	0.240237	0.287416	0.111921	0.0960516	0.0965563			647	0.169255	0.191112	0.184903	0.205419	0.147506	0.149673	0.145872	0.148792	0.160157	0.238531	0.22002	0.238422	0.120525	0.168586	0.143747	0.140621			647	0.0915562	0.0913297	0.0680073	0.0648413	0.119296	0.106434	0.0813217	0.075379					647	0.151088	0.143469
647.2	0.122406	0.123158	0.123718	0.104014	0.103176	0.105099	0.272442	0.239026	0.285817	0.111042	0.0955123	0.0961189			647.2	0.168287	0.190177	0.183951	0.204234	0.146656	0.148964	0.145174	0.147962	0.159283	0.237453	0.218882	0.237023	0.119759	0.167525	0.143057	0.139676			647.2	0.0910027	0.0907862	0.0675866	0.0644368	0.118664	0.105693	0.0808524	0.0748725					647.2	0.150255	0.142809
647.4	0.121538	0.12239	0.122793	0.103282	0.102403	0.104439	0.270798	0.237274	0.283883	0.110139	0.0946509	0.0957561			647.4	0.167295	0.189042	0.182705	0.202897	0.14569	0.147993	0.144319	0.146916	0.15814	0.236097	0.2175	0.235388	0.118858	0.166289	0.141966	0.138573			647.4	0.0902803	0.0900915	0.0670083	0.0639463	0.117756	0.10492	0.0802151	0.0742926					647.4	0.149481	0.141993
647.6	0.120369	0.12133	0.121596	0.102401	0.101509	0.103491	0.268863	0.235964	0.281544	0.109667	0.0936819	0.0948905			647.6	0.165889	0.187524	0.181123	0.201114	0.144617	0.146924	0.143122	0.145674	0.156641	0.234629	0.216233	0.233695	0.117983	0.16487	0.140692	0.137271			647.6	0.0895507	0.089238	0.0663133	0.0633653	0.116863	0.103991	0.0794543	0.0736919					647.6	0.148292	0.140923
647.8	0.119694	0.120692	0.120981	0.101853	0.100946	0.102997	0.267613	0.23461	0.280194	0.109027	0.0929633	0.0947468			647.8	0.164922	0.186603	0.180105	0.200039	0.143857	0.146177	0.142256	0.14488	0.155846	0.233309	0.215168	0.232396	0.117295	0.163983	0.139966	0.136487			647.8	0.0890069	0.0887014	0.0659692	0.063016	0.116185	0.103449	0.079012	0.0732942					647.8	0.147519	0.140363
648	0.119014	0.119857	0.120117	0.101244	0.100176	0.102246	0.265734	0.233014	0.278517	0.108185	0.0921493	0.0944637			648	0.163904	0.185304	0.178936	0.198721	0.14295	0.145163	0.141181	0.143887	0.154733	0.231473	0.213502	0.230675	0.116483	0.163046	0.138946	0.135693			648	0.0882758	0.0880471	0.0654583	0.0625879	0.115373	0.10272	0.0782838	0.0728597					648	0.146748	0.139473
648.2	0.117849	0.118776	0.119082	0.100386	0.0993593	0.101325	0.264394	0.230931	0.276343	0.107219	0.0908569	0.0935589			648.2	0.162726	0.183783	0.17739	0.197101	0.141773	0.143965	0.140089	0.14266	0.153667	0.230033	0.211705	0.228926	0.115824	0.161478	0.137591	0.134355			648.2	0.0875082	0.0872202	0.064876	0.0620577	0.114471	0.101824	0.0774841	0.0721591					648.2	0.145549	0.138319
648.4	0.117361	0.118344	0.1185	0.0999408	0.0988891	0.100928	0.263594	0.230328	0.275514	0.107034	0.0903644	0.0928831			648.4	0.162062	0.182841	0.176641	0.196292	0.14132	0.143361	0.139686	0.142071	0.152924	0.229367	0.211007	0.228228	0.115353	0.161004	0.13708	0.134036			648.4	0.0871258	0.0868134	0.0645955	0.0616899	0.114117	0.101496	0.077272	0.0718545					648.4	0.144776	0.137531
648.6	0.11625	0.117546	0.11758	0.098951	0.0982023	0.100001	0.261583	0.22864	0.273244	0.106181	0.0895548	0.0916711			648.6	0.160818	0.181387	0.175193	0.19485	0.140314	0.14233	0.138714	0.140823	0.151537	0.227472	0.209402	0.226529	0.114172	0.159952	0.135898	0.132732			648.6	0.0862807	0.0859613	0.0640938	0.0611259	0.113186	0.100508	0.0766837	0.0711084					648.6	0.143508	0.136421
648.8	0.115531	0.116724	0.116923	0.0984227	0.0977916	0.0994666	0.26063	0.227573	0.272189	0.105551	0.0891437	0.0912699			648.8	0.159934	0.180384	0.174225	0.193738	0.139536	0.141424	0.137952	0.140039	0.150674	0.226378	0.208278	0.225376	0.113639	0.159193	0.13504	0.131986			648.8	0.0857411	0.0854701	0.0636962	0.0607484	0.112573	0.0999291	0.0762581	0.0707527					648.8	0.142791	0.13566
649	0.11473	0.115753	0.116127	0.0977222	0.0971785	0.0986857	0.25911	0.226169	0.270653	0.105056	0.0883309	0.090863			649	0.158729	0.179219	0.172943	0.192452	0.1385	0.140387	0.13716	0.139022	0.149529	0.22485	0.207051	0.224158	0.112988	0.158012	0.133662	0.130996			649	0.085111	0.0848796	0.0632309	0.0602953	0.111825	0.0991647	0.075595	0.0702453					649	0.141959	0.134663
649.2	0.113684	0.115071	0.114861	0.096975	0.096281	0.097838	0.257037	0.224187	0.268624	0.103854	0.0879614	0.0898878			649.2	0.157436	0.177613	0.17175	0.19074	0.137575	0.139152	0.136007	0.137882	0.148393	0.222935	0.20519	0.222684	0.111946	0.156864	0.132798	0.129667			649.2	0.0843916	0.0840773	0.0626319	0.059783	0.11092	0.0983373	0.0749992	0.0695372					649.2	0.140495	0.133635
649.4	0.113021	0.114453	0.114241	0.0964539	0.0957736	0.0974416	0.255507	0.223013	0.267464	0.103031	0.0876085	0.0894397			649.4	0.156578	0.17667	0.170792	0.189827	0.136802	0.138442	0.135364	0.13716	0.147904	0.221789	0.204026	0.221595	0.111401	0.156122	0.132165	0.128895			649.4	0.0838759	0.0835677	0.0622933	0.05942	0.110328	0.0978416	0.0745483	0.0691607					649.4	0.139631	0.132884
649.6	0.112285	0.113718	0.113458	0.09578	0.0951697	0.0968584	0.253769	0.221688	0.265577	0.102106	0.0869348	0.0890762			649.6	0.155498	0.175516	0.169611	0.188533	0.135937	0.137665	0.134487	0.136164	0.147158	0.220315	0.202596	0.219881	0.11046	0.155074	0.131384	0.127818			649.6	0.083265	0.0829432	0.0618821	0.0590022	0.109649	0.0970745	0.0739699	0.0686072					649.6	0.138743	0.131988
649.8	0.111488	0.112773	0.112602	0.0950073	0.094293	0.0961665	0.251853	0.220213	0.26351	0.101119	0.0856225	0.0881956			649.8	0.1545	0.174068	0.168257	0.187134	0.134832	0.136538	0.133405	0.134974	0.14587	0.218935	0.201016	0.218012	0.109331	0.153505	0.130187	0.126543			649.8	0.0825398	0.0821627	0.0614419	0.0584172	0.108605	0.0961972	0.0731467	0.0679455					649.8	0.137681	0.130914
650	0.110695	0.11211	0.11205	0.0946334	0.0937749	0.0956352	0.25054	0.218868	0.262143	0.100733	0.085055	0.087352			650	0.153617	0.173025	0.167314	0.186049	0.134147	0.135733	0.132704	0.134173	0.145019	0.218009	0.200048	0.216615	0.108908	0.152419	0.129249	0.125712			650	0.0820597	0.0816558	0.0610843	0.0580772	0.108077	0.0956499	0.072466	0.0674911					650	0.137035	0.130257
[truncated: 23 more columns]
