# Supplementary material for: Autophagosome membrane expansion is mediated by the N-terminus and cis-membrane association of human ATG8s
Source: eLife journal article supplement (doi:10.7554/elife.89185), 2023-06-08
Supplement: fig4-data1 [file Source data for Fig.4.xlsx]

## Sheet: Figure 4
Figure 4A			Blank liposomes: 50% DOPE/ 45% POPC/ 5% Ni-NTA																											Figure 4B			High DOPE-based liposomes: 50% DOPE/ 45% POPC/ 5% Ni-NTA
			Rh liposomes: 50% DOPE/ 43% POPC/ 5% Ni-NTA/ 2% Rh-PE
	GABARAP V4CNBD-his (n=3)															GABARAP V4CNBD-his Nmut (M1E/K2E/E7A) (n=3)															GABARAP WT-His6 + 1mM High DOPE-based liposomes (n=3)															GABARAP ΔN9-His6 + 1mM High DOPE-based liposomes (n=3)
Wavelength (nm)	+blank liposomes			+blank liposomes+100mM imidazole			+Rh liposomes			+Rh liposomes+100mM imidazole					Wavelength (nm)	+blank liposomes			+blank liposomes+100mM imidazole			+Rh liposomes			+Rh liposomes+100mM imidazole						1μM			2μM			5μM			10μM						1μM			2μM
	R1	R2	R3	R1	R2	R3	R1	R2	R3	R1	R2	R3				R1	R2	R3	R1	R2	R3	R1	R2	R3	R1	R2	R3			Time (sec)	R1	R2	R3	R1	R2	R3	R1	R2	R3	R1	R2	R3			Time (sec)	R1	R2	R3	R1
500	0.236973	0.203204	0.230354	0.0397229	0.040736	0.0224834	0.272082	0.234403	0.288492	0.0412611	0.0364365	0.0273647			500	0.190652	0.167272	0.16805	0.0370265	0.0503526	0.0306187	0.227627	0.192154	0.206742	0.0485167	0.0482371	0.0320254			0	0	0	0	0	0	0	0	0	0	0	0	0			0	0	0	0	0
500.2	0.233519	0.200437	0.226956	0.0417679	0.0424648	0.0255869	0.264903	0.229077	0.281273	0.0430934	0.0380019	0.030213			500.2	0.187277	0.1635	0.165018	0.0398608	0.0518052	0.033648	0.219882	0.186044	0.200027	0.0506284	0.0503161	0.0347971			0.4	-0.0003	0.001	0.0002	0	-0.0004	-0.0001	0.0188	-0.0005	0.0013	0.0012	-0.0009	-0.0002			0.4	0.0001	0.0001	-0.0012	0.0005
500.4	0.226925	0.196158	0.221596	0.0452695	0.046393	0.0316942	0.252043	0.219809	0.268396	0.0466323	0.0409111	0.0357166			500.4	0.180715	0.156879	0.159804	0.0443775	0.0556222	0.0401339	0.205973	0.175301	0.187586	0.0551386	0.0541417	0.0404218			0.8	-0.0004	0.0007	0	0.001	-0.0003	0.0003	0.0198	0.0006	0.0002	0.0023	0.001	0.0004			0.8	0.0003	-0.0012	0.0001	0.001
500.6	0.224282	0.194514	0.219223	0.0472383	0.0484815	0.0346773	0.246252	0.215539	0.262513	0.0484451	0.042352	0.0383222			500.6	0.177737	0.15432	0.157337	0.0466596	0.0575918	0.0429404	0.199958	0.170473	0.181913	0.057576	0.0560062	0.042966			1.2	-0.0011	0.0006	0.0001	0.0013	0.0001	0	0.0201	-0.0003	0.0009	0.0048	0.0006	0.0006			1.2	0.0002	0.0005	-0.0007	0.0015
500.8	0.22007	0.191452	0.214715	0.0509048	0.0523945	0.0401685	0.236226	0.208058	0.252185	0.0516816	0.0449462	0.0434151			500.8	0.173217	0.149933	0.152679	0.0514351	0.0611046	0.0484815	0.18926	0.162057	0.172287	0.0619016	0.0591967	0.0478733			1.6	-0.0009	0.0003	0	0.0013	-0.0006	0.0001	0.0201	0.0008	0.0009	0.0054	0.0018	0.0011			1.6	-0.0001	-0.0002	-0.0006	0.0017
501	0.217935	0.189403	0.212037	0.0538218	0.0552068	0.0444357	0.229744	0.202902	0.245487	0.0543435	0.0468519	0.0473977			501	0.170581	0.14696	0.149647	0.0554041	0.0634823	0.052393	0.182127	0.155943	0.165554	0.0653292	0.0618015	0.0516706			2	-0.0002	0.0013	-0.0003	0.0008	-0.0004	-0.0006	0.0196	-0.0003	0.0015	0.0075	0.0013	0.0022			2	0.0006	0.0002	-0.0008	0.0014
501.2	0.216568	0.188111	0.210438	0.0561971	0.0574176	0.0477618	0.225391	0.199372	0.240601	0.056515	0.0484463	0.0505449			501.2	0.168842	0.144913	0.147693	0.0583083	0.0653016	0.05556	0.177022	0.151668	0.160253	0.0678904	0.0640434	0.0547373			2.4	-0.0002	0.0011	-0.0002	0.0023	-0.0009	-0.0005	0.0211	0.0002	0.0017	0.0091	0.0016	0.0015			2.4	0.0004	-0.0012	-0.001	0.0015
501.4	0.215916	0.187512	0.20986	0.0589442	0.0602416	0.0517994	0.221181	0.196312	0.236272	0.0590562	0.0507198	0.0541394			501.4	0.167586	0.143018	0.146454	0.0616617	0.0679325	0.0594425	0.172023	0.147762	0.155293	0.0710068	0.0666951	0.0583201			2.8	0.0005	0.0012	-0.0006	0.0021	0	0	0.0209	0.0006	0.0021	0.0102	0.0022	0.0034			2.8	0	-0.0014	-0.0002	0.0021
501.6	0.215712	0.187369	0.20961	0.0609824	0.0625979	0.0548516	0.218238	0.194241	0.233246	0.0609989	0.0524736	0.0569705			501.6	0.166766	0.141727	0.145777	0.0642594	0.0702042	0.0625006	0.168377	0.145055	0.151939	0.0734328	0.0687109	0.0611118			3.2	-0.0005	0.0006	0.0002	0.0024	0	0.0006	0.0212	0.0006	0.0014	0.0121	0.0028	0.0042			3.2	0.0001	-0.0008	-0.0002	0.0026
501.8	0.216197	0.187805	0.20993	0.0637527	0.0654946	0.0584071	0.215975	0.192563	0.231156	0.0636125	0.0546347	0.0604191			501.8	0.166462	0.141101	0.14526	0.0675039	0.0729572	0.0659402	0.165064	0.142384	0.149125	0.0766393	0.0711187	0.064426			3.6	-0.0004	0.0002	-0.0004	0.0033	-0.0005	0	0.0221	0.0014	0.0027	0.0135	0.0032	0.0041			3.6	0.0008	-0.0009	-0.0009	0.0022
502	0.216839	0.18837	0.210443	0.0658051	0.0676874	0.0613157	0.214556	0.191631	0.229928	0.0656579	0.0563164	0.0630819			502	0.166447	0.140948	0.145257	0.0700756	0.0750209	0.0687801	0.162972	0.1406	0.147305	0.0790829	0.073077	0.066865			4	-0.0012	0.0005	-0.0005	0.0028	-0.0009	0.0003	0.0216	0.0008	0.0021	0.0148	0.0033	0.0056			4	-0.0005	-0.0007	-0.0004	0.0032
502.2	0.218382	0.18979	0.211829	0.0684533	0.0704357	0.0646438	0.213843	0.191475	0.229411	0.0682298	0.0585406	0.0659313			502.2	0.167303	0.141254	0.145836	0.0731789	0.077646	0.0721359	0.161473	0.139449	0.14592	0.0823277	0.0758078	0.0698428			4.4	-0.0006	0.0011	-0.001	0.0043	-0.0009	0.0005	0.0231	0.0021	0.003	0.0173	0.0045	0.0057			4.4	-0.0001	-0.001	-0.0005	0.003
502.4	0.219957	0.1911	0.213183	0.0705297	0.0726236	0.0671453	0.213639	0.191677	0.229294	0.0702874	0.0601806	0.0681653			502.4	0.168252	0.141698	0.146494	0.0754761	0.079801	0.0747829	0.160697	0.138851	0.145193	0.0848157	0.0779755	0.0721937			4.8	-0.001	0.0007	0	0.0044	-0.0011	0.001	0.0232	0.0018	0.0032	0.0191	0.0052	0.0071			4.8	-0.0004	-0.0012	-0.0008	0.0039
502.6	0.222495	0.193269	0.215458	0.0729416	0.0752397	0.0702784	0.214463	0.192709	0.230019	0.072872	0.0622866	0.0710397			502.6	0.169902	0.142743	0.147859	0.0784404	0.0822774	0.0779562	0.160628	0.138834	0.144857	0.0877932	0.0807412	0.0751325			5.2	-0.0006	-0.0002	-0.0001	0.0045	-0.0014	0.0006	0.0233	0.0014	0.0038	0.0204	0.0046	0.0075			5.2	0.0001	-0.0009	-0.0008	0.0037
502.8	0.224626	0.195058	0.217543	0.0748931	0.0773374	0.0727813	0.21546	0.193626	0.230993	0.0748355	0.0639844	0.0733252			502.8	0.171312	0.14373	0.1492	0.0807632	0.0843078	0.0803261	0.160929	0.13902	0.145007	0.0901393	0.0828883	0.0774787			5.6	-0.0011	0.0013	-0.0001	0.0048	-0.0009	0.0009	0.0236	0.0016	0.0041	0.0232	0.0052	0.0087			5.6	0.0002	-0.0011	-0.0004	0.0045
503	0.227839	0.19791	0.220576	0.0774961	0.0799749	0.0758374	0.217245	0.195471	0.233107	0.0773826	0.0661525	0.0761413			503	0.173723	0.145448	0.151229	0.0836868	0.0869628	0.0832162	0.162	0.139992	0.145821	0.0932005	0.0855724	0.0803036			6	-0.0005	0.0014	0.0002	0.0052	-0.0017	0.0005	0.024	0.0024	0.0041	0.0239	0.0076	0.0093			6	0.0005	-0.0005	-0.0004	0.0047
503.2	0.230569	0.200377	0.223193	0.0795469	0.0820269	0.0781872	0.218875	0.197103	0.235033	0.0793888	0.0678714	0.0784675			503.2	0.175832	0.146958	0.15307	0.0859863	0.0890586	0.0855375	0.16315	0.141007	0.146653	0.0956614	0.0876541	0.0826674			6.4	-0.0017	0.0013	-0.0004	0.0063	-0.0017	0.0006	0.0251	0.0026	0.0039	0.0257	0.0071	0.0096			6.4	0.0003	-0.0012	-0.0007	0.0057
503.4	0.23441	0.203841	0.227097	0.0821572	0.0846576	0.0811097	0.221648	0.199684	0.23789	0.081917	0.0699803	0.0813178			503.4	0.178792	0.149385	0.155844	0.0888115	0.0918598	0.0885572	0.165104	0.142711	0.148224	0.0985917	0.0902191	0.085479			6.8	-0.0011	0.0016	-0.0003	0.007	-0.0015	-0.0003	0.0258	0.003	0.0043	0.0271	0.0084	0.011			6.8	0.0005	-0.0019	0.0001	0.0056
503.6	0.237611	0.206793	0.230319	0.0841954	0.0868089	0.0833734	0.224037	0.201807	0.240386	0.0839346	0.0716624	0.0835865			503.6	0.181314	0.151436	0.158221	0.091039	0.0940734	0.0908639	0.16681	0.144186	0.149654	0.100932	0.0923252	0.0877663			7.2	-0.0011	0.0018	0.0001	0.0075	-0.0011	0.0008	0.0263	0.0033	0.0054	0.0291	0.0077	0.0118			7.2	0.0003	-0.0016	-0.0018	0.0059
503.8	0.241946	0.210629	0.234667	0.086856	0.0894836	0.0861358	0.227527	0.204964	0.244213	0.0865337	0.0739516	0.0863835			503.8	0.184921	0.154197	0.161312	0.0939857	0.0968174	0.0936822	0.169416	0.146353	0.152182	0.104053	0.0951106	0.090648			7.6	0	0.0019	0.0006	0.0081	-0.0013	0.0013	0.0269	0.0046	0.0048	0.0309	0.0089	0.0125			7.6	0.0006	-0.001	-0.0013	0.0062
504	0.245621	0.213811	0.238203	0.0889426	0.0916894	0.0883193	0.230437	0.207655	0.247309	0.0886639	0.0758014	0.0886024			504	0.187879	0.156572	0.163923	0.096293	0.0990838	0.0960268	0.171727	0.148215	0.154275	0.10655	0.0972768	0.092864			8	-0.0008	0.0011	-0.0004	0.008	-0.0013	0.0011	0.0268	0.0048	0.0063	0.0327	0.0094	0.0138			8	0.0009	-0.0019	-0.0006	0.0066
504.2	0.250505	0.218012	0.242881	0.0915669	0.0944639	0.0911536	0.234535	0.211433	0.251588	0.0913466	0.0781561	0.0912777			504.2	0.191826	0.159825	0.167304	0.0992517	0.101904	0.0990341	0.175092	0.15088	0.15698	0.109689	0.100255	0.0956384			8.4	-0.0004	0.001	0.0007	0.0091	-0.0005	0.0009	0.0279	0.0045	0.007	0.0342	0.0105	0.0138			8.4	0	-0.0017	-0.0011	0.0074
504.4	0.254409	0.221603	0.246754	0.0936821	0.0966769	0.0934713	0.237934	0.214567	0.255093	0.0934875	0.0800249	0.093486			504.4	0.195032	0.162412	0.170026	0.10156	0.104195	0.10148	0.177897	0.153213	0.159297	0.112222	0.102687	0.0979628			8.8	-0.0009	0.0014	-0.0003	0.0092	0	0.0012	0.028	0.005	0.0061	0.0366	0.0112	0.0153			8.8	0.001	-0.0022	-0.0007	0.0085
504.6	0.259487	0.226287	0.251801	0.096385	0.0995421	0.09642	0.242573	0.218673	0.260018	0.0963303	0.0824214	0.0962982			504.6	0.199381	0.166017	0.173771	0.104515	0.107165	0.10456	0.181664	0.1564	0.162623	0.115497	0.105794	0.100892			9.2	-0.0007	0.0014	-0.0005	0.0099	-0.0007	0.0012	0.0287	0.0058	0.007	0.0385	0.0126	0.0159			9.2	0.0001	-0.0013	-0.0004	0.0081
504.8	0.263605	0.230046	0.25592	0.0985934	0.101829	0.0987865	0.246363	0.222037	0.263987	0.0986217	0.0843332	0.0985909			504.8	0.202993	0.168971	0.176857	0.106927	0.109545	0.107008	0.184789	0.159017	0.165453	0.118122	0.108214	0.103288			9.6	-0.0009	0.0011	0.0003	0.0112	-0.0005	0.0005	0.03	0.0063	0.0071	0.0405	0.0128	0.0159			9.6	0	-0.0017	-0.0013	0.0083
505	0.269092	0.234898	0.261464	0.101413	0.104715	0.101656	0.251306	0.226402	0.269209	0.101581	0.086786	0.101513			505	0.207696	0.172849	0.180971	0.110076	0.112628	0.110057	0.188932	0.162425	0.169108	0.121546	0.111221	0.106319			10	-0.0003	0.0018	0.0002	0.0117	0	0.0017	0.0305	0.006	0.0078	0.0419	0.0132	0.0174			10	0.0001	-0.002	-0.0016	0.0086
505.2	0.273563	0.238844	0.26586	0.103737	0.107073	0.104027	0.255283	0.229969	0.273449	0.103853	0.0887697	0.103867			505.2	0.211588	0.175972	0.184232	0.11256	0.115086	0.112546	0.192362	0.165227	0.172102	0.124241	0.113753	0.108896			10.4	0.0002	0.0019	-0.0001	0.0121	-0.0007	0.0022	0.0309	0.0071	0.0084	0.0441	0.0147	0.0181			10.4	0.001	-0.0009	-0.0008	0.0089
505.4	0.279307	0.243925	0.271405	0.10676	0.110089	0.107059	0.260489	0.234588	0.278935	0.106807	0.0913325	0.106798			505.4	0.216482	0.179936	0.188504	0.115746	0.118216	0.115752	0.196795	0.168931	0.175964	0.127745	0.116851	0.111972			10.8	-0.0011	0.0022	0.0002	0.0126	-0.0005	0.0015	0.0314	0.0066	0.0086	0.0458	0.0148	0.0193			10.8	0.0004	-0.0011	-0.001	0.0088
505.6	0.283934	0.248042	0.275972	0.109146	0.112543	0.109472	0.264751	0.238344	0.283361	0.109266	0.0933901	0.109183			505.6	0.22049	0.183217	0.191979	0.118266	0.120784	0.118315	0.200441	0.171824	0.179227	0.130602	0.119367	0.114491			11.2	0.0002	0.0016	-0.0005	0.0133	0	0.0019	0.0321	0.0079	0.0102	0.0473	0.016	0.0197			11.2	0.0008	-0.001	-0.0011	0.01
505.8	0.289848	0.253228	0.281993	0.112188	0.115623	0.112553	0.270258	0.243198	0.289284	0.112387	0.0959784	0.112398			505.8	0.225714	0.187605	0.196418	0.121628	0.123993	0.121571	0.205201	0.17577	0.183302	0.134182	0.122502	0.117755			11.6	-0.0006	0.0022	0.0011	0.0142	0.0004	0.0016	0.033	0.0078	0.0097	0.0504	0.0161	0.0201			11.6	0.0014	-0.0021	-0.0012	0.0103
506	0.294613	0.257379	0.286817	0.114632	0.118145	0.11502	0.274668	0.247069	0.294041	0.114862	0.098122	0.114989			506	0.229997	0.191112	0.20004	0.124333	0.126679	0.124244	0.209059	0.178899	0.186659	0.137079	0.125061	0.120361			12	-0.0007	0.0018	0.0005	0.0156	0.0006	0.0022	0.0344	0.0093	0.0099	0.0516	0.0171	0.0214			12	0.0002	-0.0012	-0.0008	0.0097
506.2	0.300772	0.262851	0.292972	0.117735	0.121348	0.118119	0.280398	0.252228	0.300016	0.118086	0.100826	0.118267			506.2	0.235499	0.195479	0.204813	0.127657	0.130129	0.127662	0.214015	0.183007	0.191029	0.140918	0.128397	0.123682			12.4	-0.0005	0.0032	0.0009	0.0161	0.0007	0.0029	0.0349	0.0095	0.0104	0.0531	0.0176	0.022			12.4	0.0007	-0.0014	-0.0013	0.0102
506.4	0.305758	0.267299	0.297839	0.120282	0.123897	0.120707	0.285098	0.256357	0.304953	0.120698	0.102986	0.120968			506.4	0.23993	0.199068	0.208589	0.130301	0.132849	0.130396	0.21809	0.186387	0.194588	0.143962	0.131152	0.126398			12.8	-0.0003	0.0022	0.0005	0.0166	-0.0004	0.0027	0.0354	0.0099	0.0119	0.0546	0.0191	0.0231			12.8	0.001	-0.0016	-0.0007	0.0113
506.6	0.312114	0.273036	0.304081	0.123529	0.12725	0.124041	0.290952	0.261763	0.311225	0.124001	0.105743	0.124306			506.6	0.245467	0.203631	0.213406	0.133679	0.136295	0.1339	0.223153	0.190618	0.199193	0.147842	0.134698	0.129774			13.2	-0.0007	0.0029	0.0012	0.0169	0.0004	0.0035	0.0357	0.0102	0.0116	0.057	0.0196	0.0246			13.2	0.001	-0.0008	-0.0001	0.0123
506.8	0.317139	0.277643	0.309149	0.126096	0.129959	0.126725	0.295692	0.266068	0.316311	0.126617	0.108067	0.127034			506.8	0.250063	0.207412	0.217243	0.136426	0.139103	0.136801	0.227318	0.194009	0.20294	0.151042	0.137589	0.132581			13.6	-0.0009	0.0025	0.0007	0.017	0.0005	0.0029	0.0358	0.0108	0.0122	0.0592	0.0205	0.0249			13.6	0.0015	-0.0021	-0.0008	0.0121
507	0.323533	0.283535	0.315679	0.129388	0.133386	0.130082	0.301751	0.271567	0.322818	0.130094	0.110952	0.130397			507	0.256003	0.212235	0.222224	0.140112	0.142777	0.140378	0.232753	0.198428	0.207738	0.155103	0.141176	0.135992			14	-0.0004	0.0026	0.0008	0.0177	0.001	0.0035	0.0365	0.0112	0.0131	0.0617	0.0216	0.0259			14	0.0014	-0.0018	-0.0007	0.0124
507.2	0.328855	0.288281	0.320953	0.132047	0.136102	0.132809	0.306676	0.275978	0.328086	0.132896	0.113308	0.133152			507.2	0.260829	0.216161	0.226299	0.143038	0.14568	0.143346	0.237199	0.202037	0.211615	0.158343	0.144037	0.138822			14.4	0	0.0019	0.0008	0.0187	0.0016	0.0038	0.0375	0.0127	0.0135	0.0628	0.0217	0.0266			14.4	0.0013	-0.0015	-0.0009	0.0125
507.4	0.335457	0.294177	0.327757	0.135421	0.139624	0.136375	0.313023	0.281632	0.334762	0.136465	0.116261	0.136755			507.4	0.266947	0.221212	0.231587	0.146912	0.14931	0.147178	0.2428	0.206691	0.216567	0.162568	0.1477	0.142435			14.8	0.0005	0.0042	0.0004	0.0194	0.0023	0.004	0.0382	0.0117	0.0134	0.0661	0.023	0.0282			14.8	0.0016	-0.0021	-0.0004	0.0131
507.6	0.34075	0.299003	0.333276	0.138239	0.142508	0.139255	0.31813	0.286258	0.34022	0.139383	0.11864	0.139769			507.6	0.271884	0.225193	0.235843	0.149941	0.152316	0.150246	0.247412	0.210522	0.220631	0.166016	0.150636	0.145418			15.2	0.0005	0.0031	0.0003	0.0208	0.0013	0.0034	0.0396	0.0132	0.0145	0.0672	0.0242	0.0286			15.2	0.0019	-0.0014	-0.001	0.0136
507.8	0.34619	0.303892	0.33879	0.141155	0.145399	0.142138	0.32333	0.290887	0.345877	0.14233	0.121105	0.14268			507.8	0.276835	0.229333	0.240206	0.152965	0.155453	0.153245	0.25213	0.214315	0.224677	0.169431	0.153621	0.14844			15.6	-0.0001	0.0034	0.0005	0.0209	0.0026	0.0032	0.0397	0.0131	0.0145	0.0688	0.0267	0.0289			15.6	0.0015	-0.0009	-0.0017	0.0133
508	0.353018	0.310086	0.345797	0.144819	0.148984	0.145753	0.329857	0.296848	0.352772	0.146001	0.124163	0.146391			508	0.283076	0.234564	0.245716	0.156923	0.159324	0.157019	0.257968	0.219146	0.229786	0.173681	0.15735	0.152341			16	-0.0003	0.0026	0.0011	0.0214	0.0009	0.0044	0.0402	0.0137	0.0156	0.0713	0.0253	0.0301			16	0.0019	-0.0018	-0.0007	0.0145
508.2	0.358612	0.31505	0.351395	0.147764	0.151974	0.148738	0.335138	0.301452	0.358416	0.149012	0.126675	0.149489			508.2	0.28813	0.238723	0.250131	0.160169	0.162525	0.160183	0.26273	0.223014	0.233899	0.17722	0.16053	0.155505			16.4	-0.0004	0.0029	0.0014	0.0219	0.0019	0.0038	0.0407	0.0142	0.0156	0.0723	0.0278	0.0313			16.4	0.0026	-0.0017	-0.0007	0.0145
508.4	0.365597	0.321285	0.358383	0.151456	0.155705	0.152605	0.341741	0.307317	0.365683	0.152751	0.129846	0.153303			508.4	0.294454	0.243991	0.25575	0.164175	0.166503	0.164227	0.268708	0.227906	0.239149	0.181664	0.16459	0.159479			16.8	0.0006	0.0032	0.002	0.0235	0.0025	0.0049	0.0423	0.0153	0.0159	0.0742	0.0279	0.0316			16.8	0.0017	-0.0019	-0.0011	0.0145
508.6	0.374077	0.328945	0.367008	0.155966	0.16034	0.157246	0.34971	0.314538	0.374346	0.157388	0.133825	0.158021			508.6	0.302282	0.250323	0.262706	0.169078	0.171349	0.169035	0.27588	0.233987	0.24564	0.18712	0.16939	0.16413			17.2	0.0002	0.0034	0.0012	0.024	0.0031	0.005	0.0428	0.0164	0.0168	0.0782	0.0293	0.033			17.2	0.0023	-0.0018	-0.0008	0.0151
508.8	0.378408	0.332828	0.371508	0.158234	0.162731	0.15958	0.353733	0.318305	0.378632	0.159769	0.135802	0.160413			508.8	0.306388	0.253535	0.266091	0.171538	0.173884	0.17143	0.279575	0.237082	0.248906	0.189889	0.171888	0.166627			17.6	0.0006	0.0038	0.0013	0.0246	0.0031	0.005	0.0434	0.0165	0.0174	0.0784	0.0292	0.0339			17.6	0.0026	-0.001	-0.0009	0.0157
509	0.387068	0.340644	0.380476	0.16296	0.167496	0.164393	0.36198	0.325733	0.387463	0.164495	0.139994	0.165346			509	0.314525	0.260219	0.273013	0.176641	0.178977	0.176321	0.287031	0.243288	0.255317	0.195405	0.176931	0.171427			18	0.0011	0.0039	0.0015	0.0262	0.0037	0.0048	0.045	0.0161	0.0178	0.0813	0.0311	0.0358			18	0.0029	-0.0012	-0.0006	0.0159
509.2	0.391359	0.344671	0.384806	0.16534	0.169864	0.16673	0.36602	0.329403	0.391895	0.16688	0.142031	0.167707			509.2	0.318647	0.263484	0.276544	0.179178	0.181485	0.178889	0.290678	0.24639	0.258629	0.198213	0.179447	0.173856			18.4	0.0008	0.0034	0.002	0.0264	0.0029	0.0053	0.0452	0.0174	0.0171	0.0828	0.0313	0.0361			18.4	0.0019	-0.0018	-0.0001	0.0154
509.4	0.40009	0.352848	0.393715	0.170149	0.174722	0.171805	0.374545	0.336882	0.400706	0.171791	0.146189	0.172629			509.4	0.326976	0.270172	0.283603	0.184312	0.186478	0.18408	0.298411	0.252697	0.26532	0.204055	0.184562	0.178815			18.8	0.0007	0.0036	0.0022	0.0276	0.004	0.0053	0.0464	0.0189	0.0197	0.0845	0.0326	0.0365			18.8	0.0022	-0.0013	-0.0007	0.0171
509.6	0.404488	0.356888	0.398271	0.172623	0.177248	0.174324	0.378777	0.340637	0.405269	0.174303	0.148267	0.175064			509.6	0.331238	0.273607	0.28728	0.186889	0.18903	0.186687	0.302298	0.255962	0.268747	0.20684	0.187146	0.181323			19.2	0.0004	0.0038	0.0031	0.0281	0.0034	0.006	0.0469	0.0184	0.0187	0.0872	0.0332	0.0365			19.2	0.0027	-0.0019	-0.0004	0.0158
509.8	0.413575	0.365103	0.407482	0.177488	0.18227	0.179244	0.387319	0.348239	0.414409	0.179289	0.152503	0.18004			509.8	0.339649	0.280614	0.294579	0.192212	0.194255	0.191959	0.310163	0.262466	0.275586	0.212768	0.19233	0.186574			19.6	0.001	0.0046	0.0021	0.0283	0.0048	0.0059	0.0471	0.0189	0.0185	0.0883	0.034	0.0378			19.6	0.0025	-0.0015	-0.0008	0.0175
510	0.418079	0.369207	0.412202	0.17997	0.184729	0.181761	0.3918	0.351967	0.418927	0.181844	0.154752	0.182548			510	0.344036	0.284168	0.298182	0.195057	0.196941	0.194625	0.314217	0.265704	0.278942	0.215765	0.194961	0.189145			20	0.0016	0.0027	0.0022	0.0294	0.0043	0.006	0.0482	0.0203	0.0194	0.0892	0.0352	0.0401			20	0.0028	-0.0013	-0.0009	0.0179
510.2	0.427067	0.377441	0.421646	0.184938	0.189723	0.186891	0.400507	0.359663	0.42815	0.187102	0.159006	0.187839			510.2	0.352815	0.291251	0.305546	0.200567	0.202309	0.19985	0.322078	0.272384	0.285793	0.22162	0.200367	0.194453			20.4	0.0018	0.0045	0.0025	0.0304	0.0051	0.0068	0.0492	0.0209	0.0212	0.0918	0.0361	0.0412			20.4	0.0037	-0.0008	-0.0003	0.0184
510.4	0.431694	0.381528	0.426374	0.187456	0.192278	0.18959	0.404969	0.363499	0.432847	0.189723	0.161133	0.190508			510.4	0.357145	0.294795	0.30924	0.20329	0.204974	0.202652	0.326128	0.275697	0.289283	0.224637	0.203084	0.197193			20.8	0.0006	0.0038	0.0034	0.0308	0.0053	0.0074	0.0496	0.0201	0.0214	0.0937	0.0378	0.0413			20.8	0.0032	-0.0013	-0.001	0.018
510.6	0.440779	0.38982	0.435593	0.192689	0.197503	0.194814	0.413656	0.371272	0.44204	0.194994	0.165509	0.195879			510.6	0.365713	0.301841	0.316643	0.208784	0.210329	0.208351	0.334448	0.282434	0.296278	0.230856	0.208638	0.202651			21.2	0.0005	0.0047	0.002	0.0313	0.0059	0.0066	0.0501	0.0217	0.0217	0.0951	0.0381	0.0427			21.2	0.0035	-0.0014	-0.0005	0.0182
510.8	0.445371	0.393964	0.440241	0.195369	0.200178	0.197436	0.418092	0.375056	0.446664	0.19771	0.167691	0.198488			510.8	0.370086	0.305398	0.320472	0.211446	0.213179	0.211116	0.338446	0.285891	0.299805	0.233935	0.211377	0.205429			21.6	0.0006	0.0045	0.0023	0.032	0.0055	0.0076	0.0508	0.0219	0.0222	0.0959	0.0395	0.0438			21.6	0.0029	-0.0015	-0.0011	0.0173
511	0.454805	0.402393	0.449683	0.200605	0.205444	0.20275	0.427025	0.38268	0.456218	0.203133	0.172101	0.203626			511	0.379033	0.312663	0.328155	0.216959	0.21886	0.216493	0.34663	0.29265	0.306647	0.240113	0.21714	0.210804			22	0.0016	0.0046	0.0031	0.0336	0.0066	0.0073	0.0524	0.023	0.0222	0.0976	0.0393	0.0442			22	0.0029	-0.0011	-0.0005	0.0184
511.2	0.459518	0.406673	0.454505	0.203262	0.208087	0.205431	0.43134	0.386582	0.460918	0.205853	0.17445	0.206383			511.2	0.383699	0.316267	0.332001	0.219885	0.221631	0.219431	0.350736	0.296163	0.310163	0.243223	0.219963	0.213613			22.4	0.0006	0.0044	0.0028	0.0349	0.0068	0.0078	0.0537	0.024	0.0222	0.1006	0.0418	0.0451			22.4	0.0037	-0.0015	-0.0007	0.0189
511.4	0.468918	0.41514	0.46412	0.208499	0.213566	0.210896	0.440174	0.394401	0.47011	0.211318	0.179107	0.21196			511.4	0.392786	0.323704	0.339736	0.225627	0.22741	0.225082	0.358946	0.303002	0.317259	0.249522	0.225591	0.21918			22.8	0.0016	0.0044	0.0043	0.0355	0.0069	0.0075	0.0543	0.0244	0.0242	0.1008	0.0425	0.0461			22.8	0.0042	-0.0017	-0.0007	0.0199
511.6	0.473703	0.419524	0.469113	0.211265	0.216274	0.213617	0.444615	0.398396	0.474896	0.214053	0.181382	0.214594			511.6	0.397386	0.327367	0.34358	0.22852	0.230131	0.228015	0.363105	0.306454	0.320983	0.252656	0.22842	0.221918			23.2	0.0002	0.0055	0.0035	0.0369	0.0069	0.0081	0.0557	0.0245	0.023	0.1038	0.0427	0.0475			23.2	0.0034	-0.002	-0.0003	0.0191
511.8	0.482984	0.428325	0.478587	0.216633	0.221782	0.218997	0.453562	0.40645	0.484059	0.219559	0.186196	0.220139			511.8	0.406727	0.334867	0.351243	0.234154	0.23576	0.233796	0.371366	0.313478	0.32833	0.259053	0.234129	0.227582			23.6	0.0008	0.005	0.004	0.0362	0.0075	0.0084	0.055	0.0249	0.0242	0.1038	0.0444	0.048			23.6	0.0032	-0.0021	-0.0009	0.0205
512	0.487579	0.432694	0.483484	0.219265	0.224548	0.221779	0.458187	0.410368	0.488696	0.222391	0.188543	0.222921			512	0.41135	0.338708	0.35509	0.23701	0.238656	0.236749	0.375548	0.316941	0.332005	0.262227	0.237038	0.230411			24	0.0008	0.0045	0.0035	0.0376	0.0075	0.0092	0.0564	0.0259	0.0245	0.106	0.0449	0.0488			24	0.005	-0.0019	0	0.0198
512.2	0.496943	0.441465	0.493229	0.224784	0.230061	0.22731	0.467407	0.418325	0.498295	0.228023	0.193227	0.228546			512.2	0.420612	0.346252	0.362891	0.24286	0.244386	0.24269	0.384013	0.323888	0.339462	0.268606	0.242993	0.236043			24.4	0.0006	0.0053	0.0037	0.0387	0.0077	0.0086	0.0575	0.0265	0.0258	0.1061	0.045	0.0498			24.4	0.0047	-0.0015	-0.0012	0.021
512.4	0.501664	0.445798	0.498075	0.227597	0.232956	0.230085	0.472008	0.422284	0.503074	0.230826	0.195483	0.231452			512.4	0.425152	0.349959	0.366851	0.245823	0.247207	0.245691	0.388164	0.327501	0.343092	0.271878	0.245984	0.238896			24.8	0.0015	0.0052	0.0042	0.0386	0.008	0.0087	0.0574	0.0272	0.0252	0.1081	0.0464	0.0509			24.8	0.0048	-0.0021	-0.0008	0.0211
512.6	0.511179	0.454486	0.507826	0.233187	0.238568	0.235706	0.481319	0.43026	0.51259	0.236667	0.200159	0.237236			512.6	0.434595	0.35748	0.374986	0.251808	0.252935	0.251706	0.396983	0.334582	0.350778	0.27864	0.25192	0.244881			25.2	0.0025	0.006	0.0043	0.04	0.0078	0.0083	0.0588	0.0284	0.0268	0.1092	0.0474	0.053			25.2	0.0049	-0.0011	0.0001	0.0221
512.8	0.515981	0.45883	0.512733	0.235937	0.241444	0.238517	0.485867	0.434333	0.517461	0.239596	0.202562	0.240093			512.8	0.439206	0.361322	0.379066	0.25478	0.255947	0.254638	0.401423	0.338021	0.354583	0.281972	0.254887	0.247769			25.6	0.0006	0.0064	0.0044	0.0408	0.0088	0.0103	0.0596	0.0282	0.0263	0.1111	0.0487	0.0531			25.6	0.0043	-0.0007	-0.0003	0.0211
513	0.525667	0.467667	0.522635	0.241584	0.24697	0.244098	0.49501	0.44247	0.526932	0.245481	0.207322	0.245819			513	0.448474	0.368991	0.387068	0.260659	0.262006	0.260639	0.409892	0.345172	0.362026	0.288632	0.260871	0.253623			26	0.0014	0.0059	0.0042	0.0415	0.0096	0.01	0.0603	0.0282	0.0267	0.1121	0.0496	0.0544			26	0.0043	-0.0006	-0.0003	0.0219
513.2	0.530267	0.471985	0.527497	0.244427	0.249762	0.246939	0.499641	0.446423	0.531689	0.24844	0.209853	0.24868			513.2	0.453342	0.372719	0.391123	0.263723	0.26513	0.263659	0.414269	0.348693	0.365771	0.292021	0.263858	0.256581			26.4	0.0005	0.0052	0.0047	0.0419	0.0095	0.0103	0.0607	0.0287	0.0279	0.1129	0.0505	0.055			26.4	0.0049	-0.0015	0.0002	0.0214
513.4	0.539576	0.480473	0.537256	0.250061	0.255689	0.252808	0.508478	0.454479	0.541416	0.254209	0.214653	0.25453			513.4	0.462762	0.380325	0.39936	0.269719	0.271185	0.269683	0.422763	0.356018	0.373331	0.298741	0.269927	0.262447			26.8	0.0015	0.0062	0.0043	0.0424	0.0099	0.0107	0.0612	0.0295	0.0289	0.113	0.0514	0.056			26.8	0.0051	-0.001	-0.0006	0.0224
513.6	0.54761	0.487828	0.545491	0.254986	0.260584	0.257556	0.515988	0.461079	0.549402	0.25903	0.218846	0.259277			513.6	0.470685	0.386715	0.406209	0.274793	0.276182	0.274915	0.430008	0.361797	0.37963	0.304614	0.274957	0.267466			27.2	0.002	0.0057	0.0045	0.0437	0.0091	0.0112	0.0625	0.0311	0.0283	0.1139	0.0514	0.0574			27.2	0.0055	-0.0016	0.0006	0.023
513.8	0.554125	0.493726	0.552099	0.258878	0.264545	0.261278	0.522023	0.466502	0.555893	0.262918	0.222209	0.263142			513.8	0.477133	0.391804	0.411621	0.278955	0.280271	0.278959	0.435871	0.366429	0.384692	0.309272	0.279072	0.271562			27.6	0.0019	0.0059	0.0045	0.0449	0.0111	0.0105	0.0637	0.0317	0.029	0.1153	0.0537	0.0584			27.6	0.0055	-0.0005	-0.0002	0.0229
514	0.562064	0.501057	0.56038	0.263686	0.269465	0.266187	0.529698	0.473281	0.563855	0.267936	0.226411	0.268146			514	0.48502	0.398247	0.41839	0.284102	0.285562	0.283918	0.442999	0.37234	0.390947	0.31496	0.284228	0.276465			28	0.0015	0.0065	0.0059	0.0456	0.011	0.0116	0.0644	0.0315	0.0297	0.1172	0.0542	0.06			28	0.0057	-0.0007	0.0001	0.0232
514.2	0.568375	0.506959	0.566949	0.267474	0.273421	0.270107	0.535789	0.478717	0.570319	0.27189	0.229826	0.272134			514.2	0.491472	0.403356	0.423751	0.288246	0.289805	0.28795	0.448926	0.377075	0.395975	0.31957	0.288408	0.280447			28.4	0.0018	0.0076	0.0048	0.0461	0.0111	0.0116	0.0649	0.0326	0.0296	0.117	0.0559	0.0607			28.4	0.0049	-0.0008	-0.0006	0.0233
514.4	0.57614	0.514301	0.575011	0.272373	0.278471	0.275099	0.543395	0.485561	0.578064	0.27685	0.234055	0.277196			514.4	0.499349	0.409819	0.430676	0.293494	0.294914	0.293193	0.456044	0.382992	0.402266	0.325286	0.293441	0.28548			28.8	0.0019	0.0061	0.0057	0.0469	0.0112	0.0108	0.0657	0.0325	0.0312	0.119	0.0553	0.0623			28.8	0.0042	-0.0008	-0.0001	0.0228
514.6	0.582374	0.520048	0.581439	0.276338	0.282523	0.279085	0.549467	0.490934	0.584215	0.280826	0.237364	0.281283			514.6	0.50574	0.415049	0.436093	0.297718	0.299011	0.297524	0.46178	0.38764	0.407318	0.329828	0.297465	0.289441			29.2	0.0025	0.0072	0.0059	0.0468	0.0122	0.0117	0.0656	0.0341	0.0315	0.12	0.0567	0.0625			29.2	0.0061	-0.0011	-0.0004	0.0245
514.8	0.590223	0.527321	0.589402	0.281205	0.287439	0.284079	0.557138	0.497442	0.592104	0.285916	0.241441	0.286259			514.8	0.513637	0.421312	0.442857	0.302954	0.304143	0.302818	0.46908	0.39366	0.413669	0.335771	0.302545	0.294519			29.6	0.0021	0.0066	0.0061	0.0479	0.0118	0.0118	0.0667	0.0349	0.0319	0.1192	0.0593	0.0636			29.6	0.0063	-0.0006	-0.0002	0.0248
515	0.596572	0.533106	0.59591	0.28515	0.291378	0.288125	0.563196	0.502679	0.598463	0.290011	0.24483	0.290326			515	0.519973	0.42643	0.448416	0.307152	0.308299	0.306848	0.474968	0.398505	0.418661	0.340617	0.306737	0.298591			30	0.0025	0.0074	0.0055	0.0494	0.0123	0.0121	0.0682	0.0358	0.0324	0.1209	0.0592	0.0649			30	0.0067	-0.0004	0.0002	0.0248
515.2	0.604687	0.540272	0.604058	0.290125	0.296426	0.293063	0.570916	0.509267	0.606406	0.295098	0.248926	0.295497			515.2	0.527961	0.432997	0.45527	0.312553	0.313622	0.311992	0.482272	0.404558	0.424904	0.346587	0.312046	0.303793			30.4	0.0024	0.0077	0.0061	0.0504	0.0131	0.0125	0.0692	0.0346	0.0326	0.1218	0.0606	0.0665			30.4	0.0063	-0.0004	0.0003	0.0245
515.4	0.611269	0.546065	0.610539	0.294184	0.300414	0.297095	0.576981	0.514605	0.612896	0.29928	0.252209	0.299645			515.4	0.534439	0.438178	0.460794	0.316822	0.317923	0.316215	0.488164	0.409159	0.429902	0.351401	0.316262	0.307907			30.8	0.0022	0.008	0.0059	0.0513	0.0128	0.0132	0.0701	0.0365	0.0334	0.1207	0.0608	0.0673			30.8	0.0074	-0.0005	0.0002	0.0249
515.6	0.619221	0.553336	0.618584	0.299176	0.305423	0.302146	0.584534	0.521223	0.620646	0.304307	0.256488	0.304742			515.6	0.542406	0.444632	0.467565	0.322136	0.323096	0.321614	0.495464	0.415172	0.436022	0.357428	0.321434	0.313167			31.2	0.0019	0.008	0.0064	0.0516	0.0124	0.0129	0.0704	0.0365	0.034	0.123	0.0611	0.0688			31.2	0.0069	-0.0006	0.0001	0.0252
515.8	0.625561	0.559089	0.625039	0.303146	0.309464	0.306251	0.590561	0.526486	0.626859	0.308343	0.25993	0.308824			515.8	0.548939	0.449753	0.473093	0.326438	0.327311	0.325906	0.501366	0.419947	0.441038	0.362279	0.32556	0.317329			31.6	0.0023	0.0081	0.0061	0.0528	0.0133	0.0136	0.0716	0.0384	0.0347	0.1238	0.0635	0.0689			31.6	0.0071	-0.0001	0.0001	0.0256
516	0.631889	0.564874	0.63149	0.307127	0.313528	0.310385	0.596618	0.531621	0.633215	0.312471	0.263407	0.312917			516	0.555369	0.454977	0.478575	0.33069	0.331566	0.330181	0.507076	0.424733	0.445929	0.367034	0.329705	0.321591			32	0.0025	0.008	0.007	0.0534	0.0135	0.0124	0.0722	0.038	0.0352	0.1245	0.0639	0.0707			32	0.0068	-0.0007	0.0003	0.0252
516.2	0.639624	0.571984	0.63961	0.312261	0.318567	0.315492	0.604057	0.538045	0.640994	0.3176	0.267705	0.318153			516.2	0.563449	0.461534	0.485412	0.336107	0.336827	0.335583	0.514087	0.430633	0.452025	0.372913	0.335012	0.326877			32.4	0.0033	0.0091	0.0075	0.0543	0.0136	0.0137	0.0731	0.039	0.0341	0.1244	0.0647	0.0724			32.4	0.0076	-0.0006	-0.0002	0.0257
516.4	0.645949	0.577763	0.646105	0.316283	0.322717	0.319516	0.610017	0.543288	0.647225	0.321698	0.271084	0.322364			516.4	0.569677	0.466804	0.490798	0.340511	0.34113	0.339768	0.519877	0.435354	0.457008	0.377648	0.339326	0.331174			32.8	0.003	0.0081	0.0069	0.0549	0.0144	0.0144	0.0737	0.0397	0.0362	0.1255	0.0664	0.0737			32.8	0.0071	-0.0008	0	0.0261
516.6	0.653838	0.585001	0.654253	0.32134	0.32799	0.324577	0.617477	0.549813	0.654834	0.326882	0.275137	0.327588			516.6	0.577413	0.473399	0.497602	0.345928	0.346303	0.345147	0.526988	0.441269	0.463099	0.38348	0.344692	0.336492			33.2	0.0029	0.0088	0.0069	0.0566	0.0145	0.0145	0.0754	0.0399	0.037	0.1254	0.0662	0.0737			33.2	0.0078	0.0002	0.0001	0.026
516.8	0.660186	0.590942	0.660685	0.32553	0.33202	0.328651	0.623536	0.554942	0.660915	0.331045	0.278582	0.331721			516.8	0.583889	0.478547	0.503023	0.350351	0.350613	0.349428	0.53284	0.445891	0.468097	0.388285	0.349026	0.340671			33.6	0.0021	0.0083	0.0079	0.0564	0.0151	0.0146	0.0752	0.0415	0.0367	0.1266	0.0666	0.0755			33.6	0.0072	0.0003	-0.0002	0.0265
517	0.668051	0.598287	0.668617	0.330649	0.337161	0.333788	0.631105	0.561461	0.668533	0.336286	0.282946	0.33706			517	0.591845	0.485019	0.509879	0.35584	0.356064	0.354691	0.540099	0.451698	0.474175	0.394152	0.354474	0.345843			34	0.0031	0.009	0.0071	0.0579	0.0156	0.0146	0.0767	0.0414	0.0378	0.1271	0.0687	0.076			34	0.0078	0	0.0007	0.0266
517.2	0.677216	0.606879	0.678001	0.336889	0.343203	0.340087	0.639984	0.568991	0.677601	0.34262	0.287991	0.343331			517.2	0.601333	0.492923	0.518197	0.362433	0.36243	0.361235	0.548464	0.458859	0.481351	0.401339	0.360905	0.352061			34.4	0.0037	0.0092	0.0077	0.0576	0.015	0.0139	0.0764	0.0416	0.0372	0.1274	0.0694	0.0773			34.4	0.0075	-0.0003	0.0009	0.0277
517.4	0.681941	0.611289	0.682969	0.339801	0.346314	0.343174	0.644288	0.572778	0.682325	0.345696	0.290465	0.346275			517.4	0.606159	0.496851	0.522283	0.36564	0.365605	0.364339	0.552811	0.4624	0.485006	0.405004	0.364085	0.355318			34.8	0.0033	0.0099	0.0078	0.0589	0.0149	0.0152	0.0777	0.0425	0.0384	0.1281	0.0697	0.079			34.8	0.0082	0.0005	0.0009	0.0274
517.6	0.691142	0.619765	0.692731	0.34606	0.352355	0.349534	0.653059	0.580531	0.691284	0.351931	0.295626	0.352357			517.6	0.61584	0.50448	0.530537	0.372178	0.371887	0.37101	0.561259	0.469368	0.492365	0.412084	0.370514	0.361588			35.2	0.0031	0.0086	0.008	0.0606	0.0166	0.0145	0.0794	0.0438	0.0397	0.1279	0.0707	0.0797			35.2	0.0085	0.0005	-0.0008	0.0265
517.8	0.695787	0.623977	0.697555	0.349208	0.355351	0.352666	0.657421	0.584368	0.69586	0.355169	0.298226	0.355459			517.8	0.620723	0.508466	0.534312	0.375432	0.375106	0.374365	0.565569	0.472859	0.496165	0.415691	0.373832	0.364894			35.6	0.0036	0.0102	0.0085	0.0613	0.0172	0.0155	0.0801	0.0434	0.0399	0.1283	0.072	0.0814			35.6	0.0095	0.0001	0.0006	0.0277
518	0.704984	0.632705	0.707314	0.355361	0.361552	0.358853	0.666336	0.591903	0.705094	0.361607	0.303373	0.361645			518	0.630352	0.51603	0.542446	0.382091	0.381748	0.380735	0.573919	0.479988	0.503675	0.422952	0.380315	0.371403			36	0.0036	0.0099	0.0079	0.0621	0.0172	0.0148	0.0809	0.0445	0.0395	0.129	0.0716	0.0823			36	0.0088	0.0001	0.0008	0.0284
518.2	0.709564	0.637126	0.712109	0.358542	0.364676	0.362045	0.670769	0.595792	0.709556	0.364811	0.306169	0.364856			518.2	0.635203	0.519949	0.546533	0.385383	0.384891	0.383924	0.578204	0.483496	0.507262	0.426584	0.383672	0.374632			36.4	0.0036	0.0105	0.0084	0.0618	0.0168	0.0162	0.0806	0.046	0.0396	0.1304	0.0723	0.0821			36.4	0.009	0.0001	0.0004	0.0292
518.4	0.718654	0.645825	0.721648	0.364643	0.371033	0.368185	0.67956	0.603377	0.718413	0.371228	0.311263	0.371185			518.4	0.645213	0.527871	0.554643	0.392004	0.391434	0.390535	0.586344	0.490314	0.514753	0.433877	0.390227	0.380901			36.8	0.0039	0.0096	0.0088	0.0632	0.0174	0.0157	0.082	0.0461	0.0408	0.1302	0.0734	0.0841			36.8	0.0084	0.0005	0.0008	0.0289
518.6	0.723048	0.650045	0.726619	0.367773	0.374138	0.371526	0.683724	0.607181	0.722883	0.374415	0.31393	0.374319			518.6	0.650047	0.531731	0.55881	0.39524	0.394775	0.394011	0.590464	0.493722	0.518513	0.437482	0.39333	0.384052			37.2	0.0046	0.0098	0.0084	0.0637	0.0172	0.016	0.0825	0.0471	0.0413	0.1296	0.0748	0.0852			37.2	0.0095	0.0004	0.0005	0.0294
518.8	0.731947	0.658567	0.736336	0.374103	0.380338	0.37773	0.692288	0.614681	0.731594	0.380803	0.3193	0.380326			518.8	0.659556	0.539357	0.566733	0.401888	0.401401	0.400612	0.598622	0.500705	0.525785	0.444746	0.399722	0.390301			37.6	0.0042	0.0099	0.0082	0.0654	0.0179	0.0166	0.0842	0.0469	0.0416	0.1294	0.0757	0.0871			37.6	0.009	0.0002	0.0006	0.0285
519	0.736553	0.662675	0.741013	0.377328	0.383452	0.380928	0.696554	0.618497	0.735926	0.384153	0.321932	0.383429			519	0.66449	0.543182	0.570761	0.40539	0.404873	0.403886	0.602849	0.503999	0.529439	0.448454	0.402964	0.393388			38	0.0048	0.0103	0.0089	0.0659	0.0183	0.0165	0.0847	0.048	0.0433	0.1307	0.0756	0.0885			38	0.0092	-0.0003	0.001	0.0292
519.2	0.745736	0.671281	0.750589	0.383787	0.38956	0.387062	0.70516	0.625922	0.744868	0.390718	0.327104	0.389805			519.2	0.674211	0.550993	0.579051	0.412157	0.41156	0.410349	0.611205	0.510709	0.536824	0.45565	0.409683	0.39988			38.4	0.004	0.0103	0.0093	0.0662	0.0192	0.0169	0.085	0.0489	0.0428	0.1301	0.0761	0.0885			38.4	0.0087	0.0006	0.0003	0.0298
519.4	0.750205	0.675704	0.755332	0.386888	0.392649	0.390255	0.709247	0.629867	0.749218	0.393957	0.32978	0.39292			519.4	0.678988	0.554642	0.5831	0.415613	0.414932	0.413701	0.615591	0.514059	0.540394	0.459302	0.413005	0.40302			38.8	0.0047	0.0113	0.0097	0.0671	0.0189	0.0169	0.0859	0.0499	0.0431	0.1311	0.0776	0.0898			38.8	0.0091	0.0012	0.0013	0.0305
519.6	0.759252	0.684106	0.764881	0.393276	0.398899	0.396632	0.717626	0.637223	0.758014	0.400335	0.335051	0.399225			519.6	0.688638	0.56223	0.591153	0.422339	0.421774	0.420189	0.623838	0.521062	0.547694	0.466675	0.419642	0.409332			39.2	0.0049	0.0118	0.01	0.068	0.0184	0.0175	0.0868	0.05	0.0431	0.1306	0.0781	0.0902			39.2	0.0096	0.0011	0.0011	0.0301
519.8	0.763734	0.688185	0.76963	0.396521	0.402022	0.399877	0.721947	0.640969	0.762419	0.4035	0.337799	0.402463			519.8	0.693583	0.565985	0.595112	0.425748	0.424946	0.423616	0.628041	0.524489	0.551127	0.470389	0.422966	0.412565			39.6	0.0046	0.0117	0.0099	0.0686	0.0193	0.018	0.0874	0.0504	0.0444	0.131	0.0786	0.0924			39.6	0.0099	0.0011	0.0014	0.0302
520	0.772792	0.696833	0.778996	0.402917	0.40812	0.406409	0.730358	0.648187	0.771298	0.409887	0.34308	0.408869			520	0.703346	0.573707	0.603254	0.432605	0.431625	0.430162	0.636248	0.531125	0.558358	0.477863	0.429578	0.418747			40	0.0057	0.0116	0.0102	0.0693	0.0202	0.0176	0.0881	0.0512	0.0443	0.1311	0.0788	0.0929			40	0.0098	0.0009	0.0006	0.0303
520.2	0.780407	0.703805	0.787014	0.408247	0.413325	0.411603	0.737321	0.65445	0.778529	0.415407	0.347449	0.414217			520.2	0.711326	0.580241	0.609919	0.438354	0.437206	0.435779	0.643176	0.536696	0.564325	0.48409	0.435005	0.424193			40.4	0.0041	0.0113	0.0097	0.0707	0.02	0.0178	0.0895	0.052	0.0449	0.1316	0.0796	0.0934			40.4	0.0095	0.0009	0.0012	0.0308
520.4	0.786493	0.709442	0.793506	0.412541	0.417505	0.41585	0.742782	0.659422	0.784293	0.419785	0.350912	0.418341			520.4	0.717636	0.585449	0.615192	0.442878	0.441554	0.44031	0.648751	0.541359	0.569225	0.489053	0.43941	0.42855			40.8	0.004	0.0113	0.01	0.0718	0.0206	0.018	0.0906	0.0519	0.0463	0.1328	0.0808	0.0945			40.8	0.0103	0.0003	0.0005	0.0315
520.6	0.793834	0.716383	0.801708	0.417933	0.422963	0.421295	0.749969	0.665728	0.79147	0.425268	0.355613	0.423782			520.6	0.725675	0.591942	0.621888	0.448544	0.447299	0.445885	0.655611	0.547134	0.575224	0.495378	0.44497	0.433803			41.2	0.005	0.012	0.01	0.0726	0.0208	0.019	0.0914	0.0531	0.0465	0.1325	0.0813	0.096			41.2	0.0105	0.0006	0.0012	0.0315
520.8	0.799763	0.721985	0.808026	0.422265	0.427307	0.425675	0.755534	0.67063	0.79713	0.429641	0.359292	0.428145			520.8	0.732143	0.597249	0.627391	0.453101	0.451814	0.450487	0.661114	0.551736	0.579943	0.50034	0.449383	0.438065			41.6	0.0049	0.0123	0.0109	0.073	0.0212	0.018	0.0918	0.0536	0.047	0.132	0.0825	0.0965			41.6	0.01	0.0011	0.0019	0.032
521	0.80734	0.729191	0.815897	0.427742	0.432721	0.43101	0.762569	0.676607	0.8045	0.435238	0.363859	0.433593			521	0.740166	0.603964	0.63421	0.458965	0.457472	0.456009	0.667844	0.557208	0.585958	0.506696	0.454855	0.443514			42	0.006	0.0125	0.0105	0.0724	0.0209	0.0194	0.0912	0.0546	0.0478	0.1332	0.0825	0.0978			42	0.0114	0.0012	0.0012	0.0319
521.2	0.813465	0.734877	0.822298	0.432073	0.437121	0.435264	0.768255	0.681382	0.810328	0.439699	0.367478	0.438034			521.2	0.746775	0.609259	0.639903	0.46357	0.461954	0.460458	0.673281	0.561593	0.590706	0.511766	0.459314	0.447849			42.4	0.0053	0.013	0.0109	0.0747	0.0218	0.0185	0.0935	0.0551	0.0479	0.1326	0.0823	0.0994			42.4	0.0108	0.0018	0.0012	0.0309
521.4	0.819607	0.74069	0.828649	0.436537	0.44139	0.439746	0.773767	0.686201	0.816174	0.44417	0.371198	0.442374			521.4	0.753293	0.614625	0.645466	0.46812	0.466402	0.465073	0.678769	0.566086	0.59557	0.516948	0.463947	0.452132			42.8	0.0054	0.012	0.0111	0.0749	0.022	0.0192	0.0937	0.0562	0.0488	0.1342	0.0837	0.1003			42.8	0.0122	0.0004	0.0015	0.0313
521.6	0.827192	0.747932	0.836927	0.44206	0.446793	0.445358	0.780673	0.692158	0.823574	0.449741	0.375766	0.447912			521.6	0.761382	0.621267	0.652447	0.473799	0.472162	0.470864	0.68551	0.57182	0.601628	0.523479	0.469639	0.45758			43.2	0.0056	0.0126	0.0103	0.0763	0.022	0.019	0.0951	0.056	0.0488	0.1331	0.0842	0.1004			43.2	0.0115	0.0013	0.0013	0.0325
521.8	0.83329	0.753559	0.843621	0.446679	0.451206	0.449848	0.786178	0.697153	0.829484	0.454241	0.379536	0.452403			521.8	0.767749	0.626514	0.658057	0.478532	0.476781	0.475457	0.691179	0.576449	0.60626	0.528478	0.474231	0.462118			43.6	0.0063	0.0127	0.011	0.0767	0.0224	0.0194	0.0955	0.0566	0.0493	0.1357	0.0848	0.1022			43.6	0.0115	0.0009	0.0017	0.033
522	0.841069	0.76075	0.851774	0.452435	0.456756	0.455451	0.793323	0.703266	0.836795	0.459998	0.384143	0.457945			522	0.775977	0.633118	0.665021	0.484421	0.482527	0.480893	0.698229	0.582292	0.611936	0.53493	0.479974	0.467707			44	0.0058	0.0129	0.0115	0.078	0.0238	0.0193	0.0968	0.0581	0.0503	0.1335	0.0854	0.1021			44	0.0115	0.0018	0.001	0.0334
522.2	0.847151	0.766571	0.858368	0.456976	0.461336	0.459905	0.798887	0.708162	0.842847	0.464551	0.387886	0.462525			522.2	0.78271	0.638483	0.670687	0.489176	0.487166	0.48557	0.703711	0.587016	0.616552	0.540128	0.484666	0.472151			44.4	0.006	0.0137	0.0112	0.0781	0.0233	0.0205	0.0969	0.0593	0.0513	0.1346	0.0869	0.1025			44.4	0.0117	0.0016	0.0016	0.0325
522.4	0.854642	0.773856	0.866646	0.462642	0.466982	0.465504	0.805927	0.714227	0.850356	0.470149	0.392644	0.46833			522.4	0.790967	0.64517	0.677921	0.494865	0.492847	0.491409	0.710538	0.592955	0.62231	0.546453	0.490612	0.477732			44.8	0.0058	0.0135	0.0103	0.079	0.0229	0.0199	0.0978	0.0587	0.0525	0.1324	0.0867	0.1043			44.8	0.0116	0.0019	0.0017	0.0324
522.6	0.860717	0.779663	0.873323	0.467096	0.471532	0.470029	0.811441	0.719222	0.856169	0.47474	0.396481	0.472715			522.6	0.797615	0.650514	0.683626	0.499562	0.497359	0.496041	0.715832	0.597567	0.627092	0.551517	0.495194	0.482221			45.2	0.0059	0.0135	0.0117	0.0795	0.0237	0.0202	0.0983	0.0599	0.0512	0.1352	0.0873	0.1061			45.2	0.0116	0.0018	0.0021	0.0334
522.8	0.868648	0.786844	0.88167	0.472884	0.477247	0.475597	0.818638	0.725383	0.863326	0.480512	0.401149	0.478287			522.8	0.805834	0.657282	0.690638	0.505472	0.503034	0.501798	0.722371	0.603423	0.632952	0.557874	0.500994	0.487814			45.6	0.0065	0.0141	0.0113	0.0804	0.0249	0.0202	0.0992	0.0607	0.0524	0.1342	0.0878	0.1067			45.6	0.0119	0.0023	0.0017	0.0345
523	0.878224	0.795756	0.89177	0.479734	0.484026	0.48269	0.827399	0.733044	0.871979	0.487636	0.406894	0.485297			523	0.815584	0.665544	0.699069	0.512591	0.509921	0.508883	0.730584	0.610323	0.640299	0.565748	0.508229	0.494439			46	0.0072	0.0139	0.0122	0.0816	0.0242	0.0207	0.1004	0.0606	0.0518	0.1342	0.0876	0.1074			46	0.0129	0.0015	0.0019	0.0334
523.2	0.882962	0.800194	0.89676	0.483205	0.487568	0.486178	0.831558	0.736664	0.876398	0.491295	0.409751	0.488569			523.2	0.820624	0.669614	0.703394	0.516253	0.513559	0.512382	0.734762	0.613829	0.64415	0.569651	0.511744	0.497845			46.4	0.0076	0.0138	0.0123	0.0822	0.0243	0.0213	0.101	0.0616	0.0541	0.1346	0.0889	0.1082			46.4	0.0129	0.0028	0.0017	0.0338
523.4	0.892377	0.809126	0.906993	0.490151	0.494787	0.493313	0.840077	0.744358	0.885424	0.4985	0.415835	0.4957			523.4	0.831029	0.677951	0.712183	0.523552	0.52097	0.519693	0.742886	0.620872	0.651486	0.577772	0.518708	0.505047			46.8	0.0065	0.014	0.0126	0.083	0.0253	0.0217	0.1018	0.0631	0.0542	0.1356	0.0898	0.1079			46.8	0.0129	0.003	0.0022	0.035
523.6	0.896844	0.813638	0.912129	0.49349	0.498407	0.497065	0.844321	0.748046	0.889944	0.502028	0.41875	0.499204			523.6	0.83617	0.682037	0.716583	0.527094	0.524537	0.523188	0.74692	0.624478	0.655164	0.581771	0.522312	0.50855			47.2	0.0069	0.0141	0.012	0.0834	0.0258	0.021	0.1022	0.0633	0.0554	0.1349	0.0896	0.1102			47.2	0.0126	0.0022	0.0014	0.0345
523.8	0.906122	0.822668	0.922305	0.500608	0.505416	0.504289	0.853373	0.755509	0.899114	0.509277	0.424655	0.506372			523.8	0.84647	0.690281	0.725709	0.534479	0.53177	0.530605	0.755111	0.631461	0.662329	0.589844	0.529444	0.515556			47.6	0.0066	0.0148	0.012	0.085	0.025	0.022	0.1038	0.0634	0.0563	0.1347	0.0902	0.1094			47.6	0.0123	0.0024	0.0018	0.035
524	0.911049	0.827362	0.927331	0.50407	0.508956	0.507836	0.857429	0.759227	0.903642	0.512919	0.42755	0.509916			524	0.85147	0.694459	0.730207	0.538147	0.535339	0.534458	0.759296	0.634862	0.665945	0.593815	0.533042	0.519153			48	0.0081	0.0144	0.0125	0.0848	0.0267	0.0215	0.1036	0.0643	0.0578	0.1339	0.0915	0.1113			48	0.0123	0.0026	0.0015	0.0355
524.2	0.920783	0.836554	0.937692	0.511303	0.515772	0.514976	0.86615	0.766849	0.91288	0.520178	0.433444	0.51701			524.2	0.86212	0.702621	0.739168	0.545667	0.542514	0.542044	0.767612	0.641706	0.673447	0.6019	0.540506	0.526239			48.4	0.0069	0.0144	0.0128	0.0861	0.0267	0.0224	0.1049	0.064	0.0569	0.1359	0.0909	0.1125			48.4	0.0135	0.0024	0.0021	0.0355
524.4	0.925593	0.841175	0.942986	0.514914	0.519418	0.518552	0.870378	0.77086	0.917378	0.523864	0.436535	0.520733			524.4	0.867408	0.706865	0.743668	0.549287	0.546138	0.545777	0.771729	0.645425	0.677183	0.605953	0.544321	0.529753			48.8	0.0083	0.0153	0.0132	0.0861	0.0271	0.0224	0.1049	0.0657	0.058	0.1353	0.0922	0.1122			48.8	0.0134	0.003	0.0022	0.0357
524.6	0.935213	0.850072	0.953284	0.522132	0.526679	0.525745	0.878854	0.778537	0.92629	0.531117	0.442475	0.528046			524.6	0.877313	0.715207	0.752351	0.556874	0.55351	0.553222	0.780121	0.652614	0.684535	0.614317	0.551841	0.537014			49.2	0.0079	0.0151	0.0135	0.088	0.0268	0.0224	0.1068	0.0665	0.0578	0.1354	0.0924	0.1134			49.2	0.014	0.0033	0.0017	0.0357
524.8	0.939983	0.854535	0.958502	0.525699	0.530288	0.52935	0.883209	0.782421	0.93073	0.534783	0.445426	0.531728			524.8	0.882275	0.719303	0.756749	0.560458	0.557224	0.55697	0.784425	0.655962	0.688243	0.618481	0.555528	0.540608			49.6	0.0081	0.0148	0.013	0.0876	0.026	0.0222	0.1064	0.0663	0.0583	0.1354	0.093	0.1141			49.6	0.0145	0.003	0.0028	0.0361
525	0.949619	0.863557	0.968661	0.53305	0.537625	0.536482	0.891921	0.790276	0.939565	0.542204	0.451524	0.539013			525	0.892665	0.728035	0.765564	0.568177	0.564683	0.564455	0.792768	0.662994	0.695554	0.626526	0.562992	0.54762			50	0.0081	0.0157	0.0131	0.0879	0.0272	0.0229	0.1067	0.0675	0.0593	0.1358	0.0931	0.1149			50	0.0138	0.0026	0.0016	0.0363
525.2	0.954164	0.868248	0.973781	0.536617	0.541245	0.540149	0.896306	0.793975	0.944063	0.545838	0.454534	0.542657			525.2	0.897831	0.732412	0.770074	0.571837	0.568465	0.568307	0.796927	0.666595	0.699155	0.630627	0.566704	0.551147			50.4	0.008	0.0161	0.0143	0.0889	0.0279	0.0233	0.1077	0.068	0.0601	0.1356	0.0932	0.1162			50.4	0.0139	0.0034	0.0025	0.0366
525.4	0.964007	0.877558	0.984237	0.543843	0.548516	0.547517	0.904943	0.801917	0.953303	0.55331	0.46079	0.549974			525.4	0.90807	0.740818	0.779181	0.579509	0.575881	0.576198	0.805262	0.673353	0.706643	0.639121	0.573939	0.558464			50.8	0.0083	0.016	0.014	0.0901	0.0281	0.0237	0.1089	0.068	0.061	0.1364	0.0929	0.1155			50.8	0.0144	0.0026	0.002	0.0365
525.6	0.97229	0.885197	0.993078	0.550016	0.554627	0.553838	0.912279	0.808397	0.960904	0.559614	0.465946	0.556279			525.6	0.91668	0.747982	0.7869	0.585826	0.582096	0.582592	0.812392	0.679071	0.712762	0.646192	0.579982	0.564868			51.2	0.0089	0.0166	0.0144	0.0905	0.0288	0.0231	0.1093	0.0696	0.061	0.1353	0.0946	0.1166			51.2	0.0139	0.0037	0.0021	0.0364
525.8	0.978932	0.891226	0.9999	0.554923	0.559637	0.558929	0.918054	0.8136	0.966967	0.564671	0.470018	0.5612			525.8	0.923511	0.753751	0.793145	0.591103	0.587242	0.587659	0.817974	0.683802	0.717754	0.651819	0.585105	0.569919			51.6	0.0088	0.0168	0.014	0.0913	0.028	0.0237	0.1101	0.0704	0.0618	0.1361	0.0947	0.1168			51.6	0.0146	0.0028	0.0029	0.0369
526	0.98692	0.899094	1.00851	0.561373	0.565903	0.565303	0.925161	0.819943	0.974743	0.570948	0.47532	0.567552			526	0.932203	0.76093	0.800644	0.597422	0.593745	0.594281	0.824846	0.689598	0.723913	0.659016	0.591389	0.575908			52	0.0089	0.0166	0.0147	0.0916	0.0295	0.0239	0.1104	0.0709	0.0621	0.1373	0.0947	0.1184			52	0.0145	0.0034	0.0021	0.0363
526.2	0.993097	0.905445	1.01546	0.566261	0.57094	0.570335	0.930672	0.825087	0.980856	0.575942	0.479545	0.572659			526.2	0.939078	0.766686	0.806555	0.602364	0.599006	0.599573	0.830361	0.694191	0.728818	0.664759	0.596477	0.580785			52.4	0.0088	0.0166	0.0149	0.0925	0.0284	0.0243	0.1113	0.0707	0.0634	0.1358	0.0956	0.1187			52.4	0.0147	0.0036	0.0028	0.0372
526.4	0.999485	0.911564	1.02246	0.571246	0.57617	0.575258	0.936408	0.830186	0.986928	0.581018	0.483764	0.577682			526.4	0.946175	0.772502	0.812896	0.607552	0.604313	0.604785	0.835826	0.698816	0.733673	0.670394	0.601517	0.585818			52.8	0.0088	0.0173	0.0151	0.0927	0.0299	0.0251	0.1115	0.0718	0.0631	0.136	0.0959	0.119			52.8	0.014	0.0042	0.0023	0.038
526.6	1.00742	0.919366	1.03136	0.577509	0.582553	0.581565	0.943627	0.836649	0.994497	0.58734	0.489075	0.584035			526.6	0.955059	0.779688	0.820664	0.613892	0.610763	0.611353	0.842462	0.704751	0.739627	0.677554	0.607751	0.59198			53.2	0.0088	0.0179	0.0146	0.0941	0.0299	0.0238	0.1129	0.0726	0.0645	0.1364	0.0965	0.119			53.2	0.0147	0.0039	0.0018	0.0382
526.8	1.01365	0.925476	1.03837	0.582646	0.587516	0.586481	0.949521	0.841652	1.00063	0.592529	0.493328	0.588996			526.8	0.961878	0.785399	0.82663	0.618946	0.615766	0.616513	0.848073	0.709451	0.744428	0.683331	0.612847	0.596722			53.6	0.0103	0.0177	0.0153	0.0942	0.0306	0.025	0.113	0.073	0.0646	0.1374	0.097	0.1196			53.6	0.0156	0.0039	0.0023	0.0378
527	1.02159	0.93325	1.0471	0.589143	0.593737	0.592685	0.956824	0.847929	1.00819	0.598939	0.498738	0.595301			527	0.970393	0.792496	0.834079	0.625464	0.62201	0.623095	0.854871	0.715376	0.750543	0.69045	0.619205	0.60273			54	0.0092	0.0171	0.0145	0.0949	0.0296	0.0243	0.1137	0.0735	0.0659	0.1368	0.0966	0.1203			54	0.0164	0.0041	0.0026	0.0375
527.2	1.02788	0.939473	1.05394	0.594165	0.598807	0.597573	0.962237	0.853025	1.01424	0.60402	0.503037	0.600455			527.2	0.977326	0.798162	0.840033	0.630638	0.627131	0.628364	0.860324	0.720085	0.755561	0.696026	0.62438	0.607605			54.4	0.0091	0.0178	0.0152	0.0953	0.0306	0.0253	0.1141	0.0743	0.0662	0.1367	0.0972	0.1211			54.4	0.0152	0.0038	0.0032	0.0382
527.4	1.03559	0.947278	1.06246	0.600566	0.605185	0.603832	0.969304	0.859377	1.02174	0.610442	0.508298	0.606938			527.4	0.986167	0.805255	0.847379	0.637006	0.633499	0.634844	0.867004	0.725955	0.761809	0.703029	0.630761	0.613786			54.8	0.0092	0.0185	0.0156	0.0958	0.0308	0.0249	0.1146	0.0749	0.0657	0.1371	0.097	0.122			54.8	0.0154	0.0032	0.0025	0.0386
527.6	1.04175	0.953507	1.06934	0.605671	0.610305	0.608922	0.974871	0.864417	1.02746	0.615619	0.512611	0.611948			527.6	0.992798	0.810959	0.853309	0.642103	0.638614	0.639866	0.872232	0.730786	0.766527	0.708664	0.635643	0.618679			55.2	0.0103	0.0185	0.0148	0.0969	0.0319	0.0259	0.1157	0.0752	0.0665	0.1371	0.0982	0.1225			55.2	0.0163	0.0043	0.003	0.0393
527.8	1.04969	0.961199	1.07786	0.612064	0.616669	0.615459	0.9818	0.870603	1.03467	0.621983	0.517765	0.618146			527.8	1.00123	0.817881	0.860728	0.64861	0.645064	0.64626	0.878966	0.736496	0.772309	0.715775	0.641803	0.624929			55.6	0.0095	0.0182	0.0152	0.0963	0.0325	0.0252	0.1151	0.0759	0.0683	0.1367	0.0989	0.1232			55.6	0.0159	0.0041	0.0034	0.039
528	1.05876	0.970848	1.08829	0.619707	0.624204	0.623256	0.990377	0.877957	1.0437	0.629662	0.524215	0.625736			528	1.01132	0.826174	0.869602	0.656219	0.652846	0.653954	0.886878	0.743305	0.779416	0.724195	0.649025	0.632294			56	0.0097	0.0186	0.016	0.0979	0.0317	0.0262	0.1167	0.0757	0.0689	0.1377	0.0987	0.123			56	0.016	0.0041	0.002	0.0388
528.2	1.06344	0.975418	1.09344	0.62356	0.628054	0.627027	0.99461	0.881738	1.04819	0.633513	0.527433	0.629462			528.2	1.01658	0.83033	0.874015	0.660053	0.656661	0.657691	0.890669	0.746869	0.782951	0.728394	0.652777	0.636046			56.4	0.0105	0.0183	0.0156	0.0976	0.0324	0.0254	0.1164	0.0769	0.0684	0.1376	0.0989	0.1235			56.4	0.0163	0.0041	0.0028	0.0397
528.4	1.07287	0.984852	1.10408	0.631109	0.635845	0.634704	1.00259	0.888936	1.05719	0.641175	0.533903	0.637011			528.4	1.02669	0.83854	0.882728	0.66776	0.66438	0.665417	0.89866	0.753775	0.790298	0.737003	0.660454	0.643523			56.8	0.0106	0.0189	0.0157	0.0987	0.0324	0.0258	0.1175	0.0776	0.0694	0.1374	0.0983	0.124			56.8	0.0168	0.004	0.0026	0.0397
528.6	1.07779	0.989383	1.10902	0.634968	0.639694	0.638516	1.00668	0.892731	1.06158	0.645098	0.537142	0.6409			528.6	1.03194	0.842692	0.887323	0.671452	0.668092	0.669316	0.90256	0.757093	0.793927	0.741254	0.664218	0.647239			57.2	0.0099	0.0184	0.0157	0.0994	0.0328	0.0266	0.1182	0.0794	0.07	0.1368	0.0991	0.1245			57.2	0.0153	0.0047	0.003	0.0402
528.8	1.08675	0.998308	1.11912	0.642659	0.647121	0.646261	1.01486	0.899717	1.07014	0.652715	0.54356	0.648626			528.8	1.04188	0.851202	0.895899	0.679005	0.675718	0.677089	0.910358	0.764133	0.801219	0.749393	0.672074	0.654417			57.6	0.0105	0.0191	0.0162	0.101	0.0331	0.0277	0.1198	0.0793	0.0711	0.1374	0.1005	0.1238			57.6	0.0165	0.0046	0.0032	0.0395
529	1.09123	1.00279	1.12413	0.646399	0.65095	0.650039	1.01907	0.90321	1.07422	0.656486	0.546824	0.652163			529	1.0468	0.855359	0.900201	0.682807	0.679589	0.680795	0.914326	0.767638	0.804903	0.75341	0.675961	0.65781			58	0.0105	0.0187	0.0161	0.0993	0.034	0.027	0.1181	0.0803	0.0719	0.1373	0.0994	0.1252			58	0.0155	0.0046	0.0032	0.0405
529.2	1.10001	1.01199	1.13412	0.653897	0.658426	0.65764	1.02701	0.910229	1.08287	0.664399	0.553328	0.659823			529.2	1.05666	0.863617	0.908764	0.690189	0.686944	0.688539	0.922016	0.774114	0.811992	0.761697	0.683444	0.664861			58.4	0.0115	0.0197	0.0154	0.1009	0.0352	0.0272	0.1197	0.0796	0.0726	0.138	0.1004	0.1261			58.4	0.017	0.0045	0.0036	0.0401
529.4	1.10435	1.01668	1.13934	0.657486	0.662095	0.661318	1.03103	0.91363	1.08702	0.668207	0.556302	0.663733			529.4	1.06142	0.867539	0.913029	0.694006	0.690559	0.692273	0.925715	0.777628	0.815377	0.765871	0.687266	0.668559			58.8	0.0104	0.0191	0.0168	0.1022	0.0342	0.0261	0.121	0.0806	0.0739	0.137	0.1007	0.1249			58.8	0.0168	0.0043	0.0033	0.0404
529.6	1.11347	1.0257	1.14926	0.665149	0.66946	0.669137	1.03933	0.92059	1.09543	0.675775	0.562657	0.671148			529.6	1.07128	0.875806	0.921804	0.701609	0.698053	0.699891	0.933748	0.784374	0.822239	0.774186	0.694458	0.675835			59.2	0.0112	0.019	0.0166	0.1017	0.0348	0.0275	0.1205	0.0812	0.0736	0.1381	0.1008	0.1261			59.2	0.0162	0.0055	0.0032	0.0414
529.8	1.11785	1.03026	1.1541	0.668864	0.673184	0.672931	1.0431	0.92418	1.09961	0.679692	0.565794	0.674911			529.8	1.07616	0.87985	0.926154	0.705223	0.701815	0.703683	0.937587	0.787701	0.825583	0.778287	0.698029	0.679561			59.6	0.0113	0.0196	0.0173	0.1025	0.0345	0.0274	0.1213	0.0827	0.0745	0.1383	0.1008	0.1267			59.6	0.0181	0.0045	0.0036	0.0407
530	1.12676	1.03906	1.16398	0.676393	0.680329	0.680454	1.05077	0.930969	1.10787	0.687265	0.572009	0.6824			530	1.0859	0.887903	0.934169	0.712595	0.70918	0.711166	0.945458	0.794245	0.832266	0.786532	0.705479	0.686725			60	0.0115	0.0202	0.0173	0.1034	0.0357	0.0281	0.1222	0.0822	0.0748	0.1374	0.1017	0.1275			60	0.0174	0.0053	0.0034	0.0423
530.2	1.13251	1.04486	1.17044	0.6814	0.685296	0.685414	1.05559	0.935572	1.11311	0.692243	0.576145	0.687374			530.2	1.09227	0.893103	0.939718	0.717432	0.713939	0.716148	0.950338	0.798409	0.836786	0.792002	0.710353	0.691633			60.4	0.012	0.0204	0.016	0.1033	0.0361	0.0274	0.1221	0.083	0.0769	0.1379	0.1016	0.1275			60.4	0.017	0.0049	0.0035	0.0414
530.4	1.13978	1.05189	1.17849	0.687464	0.691531	0.691513	1.06175	0.941282	1.11967	0.698547	0.58121	0.693567			530.4	1.10031	0.899786	0.946677	0.723383	0.720046	0.722227	0.956462	0.803482	0.842243	0.798736	0.716426	0.697488			60.8	0.0116	0.0208	0.0173	0.1033	0.0359	0.0276	0.1221	0.0825	0.0764	0.1384	0.1019	0.1276			60.8	0.0175	0.0051	0.0035	0.0415
530.6	1.1456	1.05742	1.18508	0.692448	0.696542	0.696671	1.06691	0.945675	1.12487	0.703418	0.585407	0.698408			530.6	1.10638	0.905123	0.952344	0.728213	0.724831	0.727037	0.961338	0.807679	0.846421	0.804103	0.721166	0.702158			61.2	0.0121	0.0209	0.0175	0.1052	0.0363	0.0286	0.124	0.083	0.0771	0.1376	0.101	0.1277			61.2	0.0172	0.0054	0.0039	0.0411
530.8	1.15276	1.06431	1.19301	0.698749	0.702693	0.702917	1.07302	0.951123	1.13146	0.709515	0.590686	0.704365			530.8	1.11391	0.911473	0.959504	0.734211	0.73078	0.733233	0.967449	0.81293	0.851824	0.810806	0.727117	0.707923			61.6	0.0121	0.021	0.0185	0.1057	0.0363	0.0284	0.1245	0.0848	0.0771	0.1395	0.102	0.1283			61.6	0.0172	0.006	0.0032	0.0425
531	1.15836	1.06992	1.19927	0.703635	0.707543	0.707945	1.07797	0.955419	1.13673	0.714402	0.594866	0.709415			531	1.12003	0.916555	0.96505	0.738871	0.735634	0.738184	0.972148	0.817198	0.856164	0.816196	0.732085	0.712627			62	0.013	0.021	0.0172	0.1053	0.0364	0.0284	0.1241	0.0857	0.0787	0.1379	0.1022	0.1292			62	0.0178	0.0057	0.0035	0.0419
531.2	1.16518	1.07677	1.20709	0.709699	0.713571	0.713943	1.08427	0.960802	1.14328	0.720734	0.600219	0.715542			531.2	1.12765	0.923037	0.97202	0.744744	0.741778	0.74415	0.978098	0.822396	0.861478	0.822831	0.738318	0.71829			62.4	0.0123	0.0212	0.0177	0.1055	0.0373	0.029	0.1243	0.0853	0.0793	0.1379	0.1027	0.1285			62.4	0.0175	0.006	0.0037	0.0432
531.4	1.17071	1.08225	1.21342	0.714441	0.718375	0.7188	1.08896	0.965122	1.1484	0.725599	0.60451	0.720388			531.4	1.13367	0.928297	0.977447	0.749578	0.746407	0.749194	0.98281	0.82643	0.865744	0.827989	0.743151	0.722763			62.8	0.0132	0.0215	0.0171	0.1062	0.038	0.0285	0.125	0.0852	0.0796	0.1389	0.1036	0.1291			62.8	0.0173	0.0062	0.0039	0.0419
531.6	1.17753	1.08909	1.22123	0.720381	0.724399	0.724961	1.09479	0.970337	1.15473	0.73173	0.609715	0.726456			531.6	1.14107	0.934543	0.984346	0.755494	0.752069	0.75539	0.988555	0.831535	0.871076	0.834361	0.748962	0.728323			63.2	0.0123	0.0223	0.0178	0.1068	0.0374	0.0293	0.1256	0.0866	0.0803	0.1376	0.1033	0.1296			63.2	0.0176	0.0053	0.0044	0.0432
531.8	1.18532	1.09713	1.22996	0.727636	0.731394	0.732236	1.10231	0.976674	1.16173	0.738911	0.615649	0.73382			531.8	1.14974	0.941922	0.992369	0.762369	0.758899	0.762433	0.995234	0.837324	0.877082	0.84193	0.755514	0.734994			63.6	0.0136	0.0216	0.018	0.1074	0.0384	0.0296	0.1262	0.0874	0.0817	0.1386	0.103	0.1295			63.6	0.0189	0.0055	0.0034	0.0432
532	1.18909	1.1011	1.23456	0.73123	0.734789	0.735806	1.10566	0.979708	1.16524	0.742581	0.618716	0.737287			532	1.15405	0.94568	0.996171	0.766019	0.762293	0.765804	0.998558	0.840219	0.880125	0.845856	0.758918	0.738344			64	0.013	0.0219	0.0184	0.1074	0.0379	0.0297	0.1262	0.0876	0.0811	0.1379	0.1036	0.1305			64	0.0184	0.0058	0.0042	0.0436
532.2	1.19681	1.10899	1.24338	0.738063	0.741861	0.74282	1.11211	0.985779	1.17242	0.749848	0.624785	0.744192			532.2	1.16282	0.95273	1.004	0.772774	0.769312	0.772431	1.00511	0.846021	0.885905	0.853409	0.765668	0.745227			64.4	0.0138	0.0212	0.0185	0.1093	0.0389	0.0298	0.1281	0.0884	0.0823	0.1377	0.1038	0.131			64.4	0.0187	0.0051	0.0044	0.0426
532.4	1.20069	1.11293	1.24756	0.741461	0.745269	0.746296	1.11526	0.988883	1.17592	0.753344	0.627779	0.747841			532.4	1.16717	0.956357	1.00771	0.7762	0.772592	0.775748	1.0083	0.848739	0.888813	0.857287	0.768996	0.748594			64.8	0.0128	0.0222	0.0185	0.1085	0.0396	0.0298	0.1273	0.0885	0.083	0.1362	0.104	0.1314			64.8	0.0184	0.0064	0.0039	0.0437
532.6	1.20829	1.12054	1.25667	0.748298	0.752086	0.753094	1.12173	0.995051	1.18251	0.760363	0.633522	0.754916			532.6	1.17556	0.963396	1.01502	0.78295	0.779146	0.782396	1.01466	0.854401	0.894723	0.864717	0.775668	0.755144			65.2	0.0137	0.0215	0.018	0.1095	0.0394	0.0306	0.1283	0.0891	0.0837	0.138	0.1041	0.1305			65.2	0.0185	0.0063	0.0046	0.0435
532.8	1.21188	1.12407	1.26096	0.751713	0.755673	0.75649	1.12506	0.998094	1.18589	0.763853	0.636753	0.758249			532.8	1.17986	0.966957	1.01871	0.786378	0.782516	0.78586	1.01783	0.857042	0.897856	0.868467	0.778872	0.758384			65.6	0.0139	0.0228	0.0182	0.109	0.0398	0.03	0.1278	0.0891	0.0848	0.1375	0.1035	0.1311			65.6	0.0184	0.0062	0.0043	0.0438
533	1.21915	1.13141	1.26925	0.758416	0.762652	0.763087	1.13119	1.00404	1.19269	0.770922	0.642485	0.765128			533	1.18831	0.973755	1.02612	0.79285	0.788881	0.792332	1.02373	0.862207	0.903608	0.875667	0.785469	0.76474			66	0.0141	0.0225	0.0197	0.1098	0.0399	0.0306	0.1286	0.0901	0.0839	0.1389	0.1035	0.1311			66	0.0196	0.0057	0.0041	0.0437
533.2	1.22267	1.13513	1.27322	0.761773	0.766149	0.766501	1.13432	1.00711	1.19603	0.774307	0.645462	0.768354			533.2	1.19219	0.977068	1.02956	0.796179	0.791988	0.795567	1.02684	0.864782	0.90632	0.879319	0.788616	0.767806			66.4	0.0144	0.0228	0.0184	0.1107	0.0398	0.0306	0.1295	0.0904	0.085	0.1393	0.1041	0.1314			66.4	0.0189	0.006	0.0038	0.0451
533.4	1.2296	1.14261	1.28157	0.768388	0.772752	0.773119	1.14068	1.01258	1.20257	0.781034	0.651198	0.775036			533.4	1.19998	0.983728	1.03728	0.802389	0.79852	0.801926	1.03264	0.870046	0.911995	0.886418	0.79499	0.774162			66.8	0.0139	0.0229	0.0194	0.1111	0.0406	0.0309	0.1299	0.0914	0.0862	0.1387	0.1054	0.1317			66.8	0.0196	0.0068	0.0044	0.0442
533.6	1.23325	1.14623	1.28543	0.771708	0.776097	0.776398	1.1438	1.01536	1.20562	0.784503	0.654011	0.778375			533.6	1.20389	0.987099	1.04071	0.805606	0.801864	0.804808	1.03558	0.872791	0.914652	0.889814	0.798136	0.77722			67.2	0.0138	0.0233	0.0185	0.1115	0.0406	0.0313	0.1303	0.0915	0.0868	0.138	0.1046	0.1321			67.2	0.019	0.0074	0.0036	0.0447
533.8	1.24037	1.15353	1.29355	0.778051	0.782758	0.783063	1.14969	1.02074	1.21179	0.791151	0.65979	0.785033			533.8	1.21171	0.993845	1.04784	0.812025	0.807993	0.811237	1.04154	0.87795	0.919979	0.896606	0.804565	0.783169			67.6	0.0147	0.024	0.0196	0.1113	0.0413	0.0316	0.1301	0.092	0.0866	0.1389	0.1055	0.132			67.6	0.0198	0.0063	0.0054	0.0447
534	1.24471	1.15828	1.29877	0.782344	0.787124	0.787282	1.15358	1.02432	1.21578	0.795552	0.663426	0.789455			534	1.21692	0.998096	1.0521	0.816074	0.812119	0.815269	1.04527	0.881156	0.923464	0.901148	0.808719	0.787192			68	0.014	0.0239	0.0197	0.1121	0.0417	0.0319	0.1309	0.0926	0.0876	0.1393	0.1047	0.1322			68	0.0197	0.0073	0.0047	0.0448
534.2	1.25011	1.16395	1.30549	0.787512	0.792509	0.792542	1.15849	1.02866	1.22069	0.80108	0.667899	0.795028			534.2	1.22346	1.00349	1.05748	0.821102	0.81717	0.820221	1.04979	0.885269	0.927613	0.906568	0.813812	0.792162			68.4	0.015	0.0241	0.0194	0.1131	0.0422	0.0314	0.1319	0.0924	0.0884	0.1386	0.1054	0.1318			68.4	0.0205	0.0071	0.0037	0.0446
534.4	1.25444	1.16826	1.31065	0.791777	0.796805	0.796598	1.16205	1.03215	1.22472	0.805455	0.671415	0.799351			534.4	1.2284	1.00778	1.06181	0.825209	0.821158	0.824102	1.05368	0.888393	0.930934	0.910954	0.817714	0.795944			68.8	0.0152	0.0242	0.0204	0.112	0.0419	0.0313	0.1308	0.0924	0.0894	0.1378	0.1057	0.1323			68.8	0.0201	0.0072	0.0041	0.046
534.6	1.25986	1.17385	1.31699	0.797016	0.802035	0.801801	1.1665	1.03631	1.22938	0.810641	0.675818	0.804679			534.6	1.23445	1.01306	1.06719	0.830119	0.825852	0.828978	1.05828	0.892546	0.935107	0.916487	0.822326	0.800726			69.2	0.0155	0.0237	0.0202	0.1126	0.0429	0.032	0.1314	0.0946	0.0905	0.139	0.1069	0.1324			69.2	0.0199	0.0072	0.0047	0.0449
534.8	1.26419	1.17814	1.32162	0.801141	0.806282	0.805898	1.17012	1.03961	1.23326	0.815037	0.679095	0.808713			534.8	1.23982	1.01675	1.07145	0.833828	0.829838	0.832752	1.06185	0.89583	0.938312	0.920928	0.826194	0.804398			69.6	0.0161	0.0243	0.0201	0.1141	0.0432	0.0323	0.1329	0.0946	0.0905	0.1387	0.1059	0.1337			69.6	0.0199	0.0076	0.0049	0.0456
535	1.26931	1.18354	1.32751	0.806291	0.81151	0.810978	1.17445	1.04373	1.23806	0.820325	0.683434	0.813945			535	1.24595	1.02179	1.07669	0.838658	0.834745	0.837335	1.06627	0.8997	0.942196	0.92645	0.831175	0.809124			70	0.0147	0.0248	0.0204	0.1131	0.0437	0.0328	0.1319	0.0948	0.0921	0.1392	0.1073	0.1336			70	0.0208	0.0068	0.0056	0.0456
535.2	1.27326	1.18774	1.33236	0.810393	0.815655	0.814899	1.17767	1.04684	1.24197	0.824487	0.686986	0.817866			535.2	1.25086	1.02591	1.08093	0.842382	0.838515	0.841102	1.06972	0.902758	0.945138	0.930705	0.835202	0.812873			70.4	0.0157	0.0252	0.0212	0.1131	0.0432	0.0326	0.1319	0.0952	0.0915	0.1392	0.1057	0.1336			70.4	0.0208	0.0076	0.0048	0.0459
535.4	1.27817	1.19297	1.33834	0.81542	0.820819	0.819757	1.18182	1.05073	1.24681	0.829596	0.691365	0.82274			535.4	1.25668	1.03067	1.08616	0.846974	0.843172	0.845898	1.07406	0.906493	0.948975	0.935744	0.840088	0.817438			70.8	0.0158	0.0249	0.02	0.114	0.0445	0.0326	0.1328	0.095	0.0929	0.1392	0.1064	0.1331			70.8	0.0214	0.0069	0.005	0.0465
535.6	1.28415	1.19945	1.34482	0.821558	0.826829	0.825649	1.18688	1.05521	1.25215	0.835471	0.696337	0.828693			535.6	1.26326	1.0362	1.09227	0.852826	0.848559	0.851615	1.07893	0.910861	0.953569	0.941941	0.845626	0.822404			71.2	0.0165	0.0255	0.0203	0.1149	0.0436	0.0331	0.1337	0.0955	0.0926	0.1399	0.1058	0.1336			71.2	0.0211	0.0074	0.0048	0.0465
535.8	1.28699	1.20241	1.34837	0.824632	0.829945	0.828525	1.18915	1.05731	1.25483	0.838473	0.698636	0.831486			535.8	1.26644	1.03903	1.0952	0.855577	0.851316	0.85439	1.08125	0.913087	0.955804	0.945002	0.848261	0.825038			71.6	0.0159	0.0251	0.0215	0.1153	0.0442	0.0331	0.1341	0.0968	0.094	0.1387	0.1075	0.1332			71.6	0.0209	0.0081	0.0052	0.0471
536	1.29259	1.20851	1.35475	0.830416	0.835817	0.83454	1.1936	1.06142	1.25973	0.844277	0.703575	0.836984			536	1.27289	1.04433	1.1013	0.860858	0.85709	0.859898	1.08599	0.917118	0.959795	0.950962	0.853449	0.830224			72	0.017	0.0254	0.021	0.1151	0.0445	0.0335	0.1339	0.0969	0.094	0.1387	0.107	0.1333			72	0.0213	0.0085	0.0049	0.0463
536.2	1.29544	1.2114	1.35784	0.833394	0.838746	0.83755	1.19577	1.06331	1.26222	0.847313	0.705851	0.839842			536.2	1.27588	1.04721	1.10421	0.863289	0.859882	0.862338	1.08834	0.91926	0.961724	0.954016	0.85617	0.832675			72.4	0.0164	0.0255	0.0213	0.1151	0.0452	0.034	0.1339	0.0977	0.0952	0.138	0.1075	0.1347			72.4	0.0204	0.0077	0.0048	0.0469
536.4	1.30052	1.21706	1.36399	0.839163	0.844477	0.843441	1.20056	1.06715	1.26673	0.853004	0.710783	0.845518			536.4	1.2823	1.05279	1.10978	0.868573	0.865417	0.867511	1.09293	0.923427	0.96589	0.9599	0.861628	0.837341			72.8	0.0159	0.0255	0.0211	0.1159	0.046	0.0338	0.1347	0.0967	0.0963	0.1391	0.1063	0.1342			72.8	0.0206	0.0081	0.0048	0.0475
536.6	1.30307	1.21976	1.3671	0.841989	0.847213	0.846216	1.20278	1.0688	1.26886	0.855804	0.713058	0.84843			536.6	1.28545	1.05547	1.11258	0.871252	0.868104	0.870109	1.095	0.925431	0.968109	0.962646	0.864378	0.839806			73.2	0.0172	0.0262	0.0204	0.1165	0.0452	0.0341	0.1353	0.0972	0.0963	0.1398	0.1068	0.1342			73.2	0.0209	0.0081	0.0047	0.0488
536.8	1.30792	1.22494	1.373	0.847571	0.852652	0.85185	1.20673	1.07281	1.27326	0.861321	0.717661	0.85389			536.8	1.29158	1.06065	1.11795	0.876253	0.872986	0.875094	1.09943	0.929423	0.971973	0.968219	0.869424	0.844825			73.6	0.0174	0.026	0.021	0.1164	0.0455	0.034	0.1352	0.0983	0.0971	0.1381	0.1065	0.134			73.6	0.0214	0.0086	0.0049	0.0476
537	1.31035	1.22763	1.37614	0.850185	0.855252	0.854601	1.20865	1.07456	1.2757	0.863971	0.719887	0.856656			537	1.29458	1.06319	1.12106	0.878803	0.875503	0.877706	1.10157	0.931225	0.973839	0.970916	0.871957	0.847286			74	0.0173	0.026	0.0212	0.1171	0.0473	0.0345	0.1359	0.0985	0.0975	0.1391	0.1067	0.1339			74	0.0214	0.0087	0.005	0.0487
537.2	1.31519	1.23303	1.38214	0.855681	0.860521	0.859929	1.21284	1.07828	1.28009	0.869414	0.724516	0.861896			537.2	1.30014	1.06799	1.12602	0.883655	0.880527	0.882633	1.10538	0.935034	0.977643	0.976264	0.877041	0.8519			74.4	0.0177	0.0261	0.0219	0.117	0.0472	0.0343	0.1358	0.0992	0.099	0.1385	0.1088	0.1351			74.4	0.0219	0.0093	0.0045	0.0476
537.4	1.31841	1.23626	1.38587	0.8593	0.863851	0.863434	1.2155	1.08054	1.28306	0.873077	0.727639	0.865328			537.4	1.30392	1.07119	1.12962	0.886884	0.883955	0.885897	1.10803	0.937525	0.980071	0.979808	0.880159	0.855063			74.8	0.017	0.0263	0.0208	0.1169	0.0466	0.0352	0.1357	0.0988	0.1	0.1389	0.1074	0.1345			74.8	0.022	0.0084	0.0058	0.0486
537.6	1.32241	1.24047	1.3904	0.863803	0.868054	0.867791	1.21887	1.08338	1.28642	0.877477	0.731475	0.86963			537.6	1.3085	1.07536	1.13393	0.890957	0.888144	0.889873	1.11152	0.940563	0.983158	0.984405	0.884147	0.858948			75.2	0.0179	0.027	0.0223	0.117	0.0471	0.0344	0.1358	0.0998	0.0995	0.1385	0.1072	0.1351			75.2	0.0218	0.0086	0.0054	0.0486
537.8	1.32523	1.24397	1.39384	0.867104	0.871457	0.871153	1.22151	1.08542	1.28883	0.88083	0.734469	0.872797			537.8	1.31202	1.07836	1.13695	0.893957	0.891119	0.892957	1.11402	0.942541	0.985451	0.987771	0.887399	0.861923			75.6	0.018	0.0263	0.0216	0.1167	0.0481	0.035	0.1355	0.1005	0.1004	0.1397	0.1076	0.1341			75.6	0.022	0.008	0.0052	0.049
538	1.32885	1.24814	1.39815	0.87131	0.87576	0.875404	1.22458	1.08808	1.29222	0.88511	0.738037	0.876888			538	1.31659	1.082	1.14074	0.897693	0.894961	0.897017	1.11707	0.945122	0.988177	0.991913	0.891318	0.86564			76	0.018	0.0265	0.0218	0.1182	0.0481	0.0348	0.137	0.1005	0.1023	0.1388	0.1073	0.1348			76	0.0225	0.0086	0.0058	0.0485
538.2	1.33159	1.25137	1.40169	0.874763	0.878916	0.878644	1.22675	1.09023	1.29454	0.888395	0.740807	0.880255			538.2	1.31963	1.0852	1.14384	0.900624	0.897992	0.900019	1.11944	0.947133	0.990378	0.995179	0.894384	0.868672			76.4	0.0182	0.028	0.0225	0.1186	0.0484	0.0363	0.1374	0.1008	0.1017	0.1402	0.1087	0.1358			76.4	0.0228	0.0086	0.0055	0.0486
538.4	1.33508	1.25514	1.40585	0.878776	0.882921	0.88262	1.22958	1.09272	1.2972	0.892528	0.744129	0.884223			538.4	1.32374	1.08897	1.14756	0.904186	0.901756	0.90394	1.12254	0.949665	0.993074	0.999176	0.898185	0.87236			76.8	0.0189	0.0274	0.0227	0.1181	0.0485	0.0357	0.1369	0.1006	0.1023	0.1384	0.108	0.1364			76.8	0.0221	0.0096	0.0056	0.0487
538.6	1.33777	1.25801	1.40916	0.8819	0.886008	0.885799	1.2319	1.09467	1.29932	0.895701	0.7468	0.88744			538.6	1.3269	1.09169	1.15059	0.906975	0.904669	0.906866	1.12469	0.951723	0.995293	1.00235	0.900914	0.875043			77.2	0.0184	0.0279	0.0227	0.118	0.0497	0.0361	0.1368	0.1013	0.1033	0.1381	0.1082	0.1361			77.2	0.0225	0.0088	0.0064	0.049
538.8	1.34107	1.26165	1.41316	0.885671	0.889971	0.889894	1.2347	1.09695	1.30173	0.899615	0.750094	0.891659			538.8	1.33101	1.09533	1.15423	0.910328	0.908382	0.9103	1.12728	0.954217	0.997634	1.0063	0.904432	0.878543			77.6	0.019	0.0279	0.0225	0.1193	0.0503	0.0361	0.1381	0.1016	0.1043	0.1385	0.1086	0.1362			77.6	0.0224	0.0096	0.0049	0.0494
539	1.34481	1.26568	1.41821	0.890361	0.894509	0.894401	1.23776	1.09973	1.30488	0.904483	0.753988	0.896315			539	1.33598	1.09953	1.15816	0.914043	0.912389	0.914163	1.1306	0.956911	1.00034	1.01097	0.908821	0.882439			78	0.0195	0.0275	0.0231	0.1193	0.0488	0.036	0.1381	0.1014	0.1049	0.1388	0.1082	0.1363			78	0.0218	0.0095	0.0062	0.0501
539.2	1.3465	1.26778	1.42044	0.892606	0.896673	0.896867	1.23941	1.10116	1.30644	0.906855	0.755968	0.89868			539.2	1.33826	1.10168	1.16021	0.915911	0.914445	0.916238	1.13212	0.95824	1.00175	1.01313	0.910887	0.884624			78.4	0.0192	0.0284	0.0226	0.1205	0.0502	0.0367	0.1393	0.102	0.104	0.1383	0.1091	0.137			78.4	0.0226	0.0089	0.0061	0.0495
539.4	1.34987	1.2718	1.42479	0.897004	0.90118	0.901297	1.24262	1.10341	1.30985	0.911288	0.75995	0.903275			539.4	1.34305	1.10586	1.16409	0.920063	0.918361	0.920092	1.13515	0.961144	1.00475	1.01756	0.915122	0.888319			78.8	0.0192	0.0279	0.0235	0.1194	0.0506	0.0372	0.1382	0.1025	0.106	0.1389	0.1089	0.1363			78.8	0.0221	0.0094	0.0059	0.0493
539.6	1.35166	1.27393	1.42703	0.899218	0.903188	0.903434	1.2441	1.10471	1.31133	0.913477	0.76175	0.905576			539.6	1.34556	1.1078	1.16611	0.922173	0.920463	0.922159	1.13665	0.962487	1.00609	1.01946	0.917142	0.890214			79.2	0.0197	0.0284	0.0229	0.1208	0.0508	0.0375	0.1396	0.1026	0.1061	0.1399	0.109	0.1363			79.2	0.0235	0.0103	0.0056	0.0508
539.8	1.35519	1.27781	1.43161	0.9036	0.907193	0.907647	1.24662	1.10703	1.31422	0.918186	0.7655	0.910047			539.8	1.3492	1.11111	1.16986	0.925875	0.924357	0.925938	1.13938	0.965231	1.00868	1.02372	0.920815	0.894114			79.6	0.0198	0.0287	0.0234	0.1204	0.0507	0.0367	0.1392	0.1037	0.1073	0.1384	0.108	0.1368			79.6	0.0237	0.0102	0.0061	0.0502
540	1.35687	1.27978	1.43381	0.905864	0.909334	0.909675	1.24805	1.10823	1.31563	0.920494	0.767292	0.912269			540	1.35142	1.1129	1.17176	0.927486	0.926109	0.927827	1.14075	0.966668	1.00988	1.02573	0.922554	0.895947			80	0.0198	0.0288	0.0234	0.1202	0.0517	0.0374	0.139	0.1032	0.1078	0.1392	0.1086	0.1376			80	0.0236	0.0101	0.0058	0.0501
540.2	1.36026	1.28375	1.43779	0.910035	0.913844	0.9139	1.25085	1.1103	1.31835	0.924822	0.770846	0.916398			540.2	1.35557	1.11652	1.17512	0.931485	0.929822	0.931557	1.14332	0.969032	1.01248	1.02969	0.926241	0.899238			80.4	0.0197	0.0297	0.0232	0.1208	0.0511	0.0378	0.1396	0.1027	0.1077	0.1392	0.1086	0.1355			80.4	0.0232	0.0102	0.0063	0.0499
540.4	1.3624	1.28601	1.44023	0.912888	0.916457	0.916509	1.25254	1.11159	1.32006	0.927609	0.773357	0.919028			540.4	1.35822	1.11875	1.17733	0.933876	0.932286	0.934009	1.14513	0.970534	1.01425	1.03239	0.928526	0.901551			80.8	0.0202	0.0286	0.0239	0.1215	0.052	0.0385	0.1403	0.1037	0.1085	0.1397	0.1084	0.1358			80.8	0.024	0.0106	0.0068	0.0501
540.6	1.36482	1.289	1.44308	0.916341	0.919855	0.919826	1.2546	1.11325	1.32206	0.930983	0.776086	0.922471			540.6	1.36144	1.12146	1.18029	0.936636	0.935333	0.936894	1.14743	0.972195	1.0163	1.03551	0.931128	0.904259			81.2	0.0207	0.0302	0.0231	0.1217	0.052	0.0377	0.1405	0.104	0.1097	0.1402	0.1086	0.1365			81.2	0.0229	0.0102	0.0058	0.0497
540.8	1.36672	1.29157	1.44551	0.918865	0.922521	0.922358	1.25585	1.11479	1.32356	0.933796	0.778121	0.925154			540.8	1.36396	1.12346	1.18225	0.938835	0.937518	0.93915	1.14903	0.973723	1.01778	1.03798	0.933349	0.906402			81.6	0.0206	0.0286	0.0236	0.1215	0.0535	0.0381	0.1403	0.1041	0.1096	0.1393	0.1093	0.1361			81.6	0.0235	0.0107	0.0059	0.0504
541	1.36897	1.2946	1.44859	0.922006	0.92582	0.925632	1.25741	1.11656	1.32557	0.937171	0.780874	0.928411			541	1.36692	1.12599	1.18489	0.941582	0.940317	0.941997	1.15081	0.975463	1.01964	1.04093	0.936099	0.908997			82	0.0199	0.0298	0.0236	0.1219	0.0529	0.0387	0.1407	0.105	0.1103	0.1385	0.1092	0.1372			82	0.0227	0.0106	0.007	0.0519
541.2	1.3708	1.29644	1.45089	0.924658	0.928298	0.928221	1.25875	1.11794	1.3269	0.93969	0.782772	0.931033			541.2	1.36934	1.12807	1.18728	0.943648	0.942549	0.944299	1.15228	0.977161	1.02106	1.04319	0.938227	0.910991			82.4	0.0204	0.0297	0.0241	0.1226	0.0533	0.0383	0.1414	0.1046	0.1117	0.1392	0.1092	0.1372			82.4	0.0242	0.0107	0.0072	0.0515
541.4	1.3728	1.29884	1.45374	0.92784	0.931437	0.931202	1.26049	1.11951	1.32847	0.94296	0.78538	0.934153			541.4	1.37234	1.13073	1.19004	0.946274	0.945184	0.946966	1.15417	0.979004	1.02284	1.04602	0.940977	0.913454			82.8	0.0212	0.0302	0.0238	0.1216	0.0528	0.0383	0.1404	0.106	0.1124	0.1418	0.1091	0.1373			82.8	0.024	0.0101	0.0065	0.0514
541.6	1.37418	1.30068	1.45585	0.930193	0.933942	0.933641	1.26169	1.1205	1.32979	0.945571	0.787655	0.936632			541.6	1.37459	1.13277	1.19214	0.948402	0.947212	0.948899	1.1556	0.980353	1.02407	1.04827	0.942951	0.915336			83.2	0.0209	0.0309	0.0244	0.1226	0.054	0.0392	0.1414	0.1055	0.1124	0.1397	0.1101	0.1361			83.2	0.024	0.0111	0.0065	0.0518
541.8	1.37593	1.30312	1.45868	0.933328	0.936726	0.936688	1.263	1.12179	1.33165	0.948783	0.790241	0.939625			541.8	1.3773	1.13499	1.19456	0.951123	0.949884	0.951234	1.15718	0.981892	1.02552	1.0511	0.945427	0.917532			83.6	0.0213	0.0303	0.0243	0.1234	0.0538	0.0394	0.1422	0.1051	0.1134	0.139	0.1092	0.1362			83.6	0.0237	0.011	0.0072	0.0519
542	1.37839	1.30567	1.46193	0.937119	0.940204	0.940193	1.26449	1.1233	1.33358	0.952277	0.792959	0.943047			542	1.38024	1.13772	1.19738	0.954115	0.95293	0.953966	1.15913	0.983629	1.02718	1.05438	0.948485	0.920164			84	0.0212	0.0301	0.0244	0.123	0.0545	0.0388	0.1418	0.1061	0.1141	0.1392	0.1099	0.1372			84	0.0246	0.0101	0.0066	0.0512
542.2	1.3795	1.30678	1.46377	0.93907	0.941925	0.941813	1.26515	1.124	1.33477	0.954064	0.794295	0.944439			542.2	1.38173	1.13884	1.19877	0.955709	0.954248	0.955589	1.16002	0.984682	1.0283	1.05598	0.949993	0.921297			84.4	0.0212	0.0309	0.0243	0.1237	0.0548	0.0389	0.1425	0.1068	0.1136	0.1387	0.1103	0.1371			84.4	0.0241	0.0113	0.0069	0.052
542.4	1.38118	1.3092	1.4667	0.942326	0.945293	0.945173	1.2671	1.12555	1.33634	0.957349	0.797174	0.947551			542.4	1.38425	1.14125	1.20153	0.958651	0.957185	0.958616	1.16187	0.986504	1.03017	1.05909	0.952537	0.923987			84.8	0.0219	0.0315	0.0248	0.1223	0.0548	0.0397	0.1411	0.106	0.1143	0.1395	0.1095	0.1369			84.8	0.0241	0.0111	0.0066	0.0522
542.6	1.38227	1.3104	1.46815	0.943858	0.946898	0.946625	1.26779	1.12602	1.33705	0.959046	0.798526	0.949151			542.6	1.38574	1.14225	1.20278	0.960122	0.958491	0.960013	1.16282	0.98732	1.03082	1.06066	0.953994	0.925159			85.2	0.0219	0.0319	0.0247	0.1234	0.055	0.0398	0.1422	0.107	0.1154	0.139	0.1097	0.1375			85.2	0.0244	0.0115	0.0067	0.0526
542.8	1.38423	1.31264	1.47067	0.947322	0.949948	0.949702	1.26914	1.12757	1.33833	0.962263	0.801155	0.952236			542.8	1.38851	1.14439	1.20529	0.962789	0.960967	0.962679	1.1644	0.988909	1.03231	1.06334	0.956564	0.927693			85.6	0.0222	0.0304	0.025	0.1242	0.0551	0.0403	0.143	0.1061	0.1165	0.139	0.1103	0.137			85.6	0.0248	0.0112	0.0065	0.052
543	1.38495	1.31354	1.47183	0.948813	0.951671	0.951356	1.26949	1.12819	1.33898	0.963934	0.802529	0.953572			543	1.38979	1.14557	1.20635	0.963925	0.96207	0.9638	1.16528	0.989448	1.03304	1.06474	0.957864	0.928941			86	0.0218	0.0308	0.0251	0.1238	0.056	0.0394	0.1426	0.1078	0.1157	0.1395	0.1096	0.1379			86	0.0253	0.0107	0.0074	0.053
543.2	1.38661	1.31556	1.47423	0.951952	0.954848	0.95435	1.27072	1.12946	1.34034	0.966631	0.804953	0.95634			543.2	1.39243	1.14802	1.20885	0.966488	0.964419	0.96639	1.16677	0.990663	1.03451	1.06736	0.960422	0.931217			86.4	0.0222	0.0316	0.0255	0.1247	0.057	0.04	0.1435	0.1083	0.1161	0.1396	0.1098	0.1379			86.4	0.0252	0.0111	0.0069	0.0528
543.4	1.38779	1.31698	1.47586	0.953825	0.95686	0.956387	1.2713	1.13022	1.34112	0.968499	0.806653	0.958007			543.4	1.39398	1.14939	1.21053	0.968112	0.966156	0.967977	1.16775	0.991342	1.03539	1.06919	0.962189	0.932734			86.8	0.0221	0.0317	0.0258	0.1237	0.0564	0.0411	0.1425	0.1074	0.1168	0.1403	0.1099	0.138			86.8	0.0249	0.0112	0.0065	0.0525
543.6	1.38901	1.31851	1.4777	0.956352	0.959163	0.958745	1.27202	1.13112	1.34194	0.970826	0.808763	0.960375			543.6	1.39581	1.15113	1.21258	0.970181	0.968041	0.969892	1.16869	0.992281	1.03643	1.07159	0.964257	0.934395			87.2	0.0226	0.0318	0.0255	0.1248	0.0565	0.041	0.1436	0.1078	0.1184	0.14	0.1104	0.1381			87.2	0.0241	0.012	0.0071	0.0527
543.8	1.38954	1.31973	1.47904	0.958375	0.96124	0.960737	1.27261	1.13175	1.34255	0.972704	0.81016	0.962052			543.8	1.39725	1.1523	1.21401	0.971574	0.969373	0.97129	1.16949	0.993074	1.03717	1.07323	0.965809	0.935914			87.6	0.023	0.0324	0.0255	0.1243	0.0567	0.0409	0.1431	0.1076	0.1184	0.1401	0.1098	0.1381			87.6	0.0254	0.0121	0.0081	0.0539
544	1.39026	1.32112	1.48088	0.96081	0.963766	0.963236	1.27297	1.1323	1.34331	0.975065	0.812113	0.964007			544	1.39885	1.1538	1.21561	0.973468	0.971055	0.973218	1.17045	0.994031	1.03774	1.07529	0.967793	0.937854			88	0.0226	0.0319	0.0254	0.1249	0.0569	0.0414	0.1437	0.1074	0.1201	0.1403	0.1111	0.1372			88	0.0245	0.0122	0.0078	0.0529
544.2	1.39095	1.32209	1.48204	0.962664	0.96545	0.965087	1.27345	1.13233	1.34355	0.976797	0.813589	0.965606			544.2	1.40015	1.15498	1.217	0.974933	0.972527	0.974637	1.17097	0.99461	1.03853	1.07681	0.969228	0.939016			88.4	0.0229	0.0328	0.0258	0.1249	0.0582	0.041	0.1437	0.1076	0.1193	0.1391	0.1102	0.1389			88.4	0.0251	0.0128	0.0071	0.0535
544.4	1.3918	1.32322	1.48345	0.965021	0.967574	0.967205	1.27397	1.13268	1.34393	0.978959	0.815193	0.96755			544.4	1.40168	1.15611	1.21864	0.976626	0.974143	0.976396	1.17183	0.995358	1.03937	1.07875	0.970854	0.940635			88.8	0.0235	0.0329	0.0256	0.1246	0.0581	0.0422	0.1434	0.1084	0.1201	0.1389	0.1109	0.1378			88.8	0.0253	0.0117	0.0071	0.0539
544.6	1.39237	1.3243	1.4847	0.966671	0.969142	0.968846	1.27422	1.13295	1.34468	0.980686	0.816593	0.969274			544.6	1.40297	1.15728	1.21962	0.978116	0.975658	0.977736	1.17238	0.995913	1.04013	1.08049	0.97207	0.941987			89.2	0.0234	0.0331	0.0254	0.1245	0.0591	0.0421	0.1433	0.1083	0.1201	0.1389	0.1096	0.1382			89.2	0.0252	0.0124	0.0076	0.0546
544.8	1.39302	1.32548	1.48603	0.968629	0.970974	0.97102	1.27444	1.13341	1.34534	0.982626	0.818113	0.971321			544.8	1.40415	1.15863	1.22098	0.979799	0.977633	0.979178	1.17278	0.996522	1.041	1.08229	0.97365	0.943552			89.6	0.0237	0.0322	0.027	0.1258	0.0591	0.0429	0.1446	0.1087	0.1207	0.1397	0.1104	0.1386			89.6	0.0254	0.0123	0.0077	0.0543
545	1.39391	1.32674	1.48766	0.970948	0.9732	0.973283	1.27494	1.13362	1.34573	0.984542	0.819832	0.973399			545	1.40613	1.15998	1.22236	0.98175	0.979645	0.981018	1.17309	0.997226	1.04197	1.08412	0.975753	0.945158			90	0.0239	0.0333	0.0261	0.1243	0.0591	0.0425	0.1431	0.1086	0.1222	0.1401	0.1099	0.138			90	0.0255	0.0115	0.0077	0.0538
545.2	1.39434	1.32747	1.48818	0.972061	0.974436	0.974332	1.27494	1.13371	1.34578	0.98566	0.820791	0.974399			545.2	1.40706	1.16078	1.2232	0.982567	0.980509	0.98189	1.17331	0.997664	1.04247	1.08484	0.976464	0.946075			90.4	0.0237	0.0323	0.0265	0.126	0.059	0.0433	0.1448	0.1081	0.1227	0.1388	0.1097	0.1384			90.4	0.0256	0.0126	0.0072	0.0534
545.4	1.39463	1.32905	1.48943	0.974041	0.976701	0.976268	1.2749	1.13376	1.34609	0.987889	0.822683	0.976311			545.4	1.40897	1.1618	1.22456	0.984466	0.982452	0.983708	1.17361	0.998182	1.04307	1.08653	0.977978	0.948045			90.8	0.0238	0.0332	0.0258	0.1256	0.0597	0.0425	0.1444	0.1094	0.1236	0.139	0.11	0.138			90.8	0.0262	0.0129	0.0081	0.0545
545.6	1.39487	1.32969	1.48956	0.975027	0.977692	0.97724	1.27508	1.13374	1.34585	0.988857	0.823604	0.977397			545.6	1.40951	1.16247	1.22517	0.985063	0.983412	0.984287	1.17389	0.998258	1.04324	1.08735	0.978553	0.948988			91.2	0.0238	0.0333	0.0269	0.1269	0.0603	0.043	0.1457	0.1088	0.1238	0.1399	0.1104	0.1384			91.2	0.0263	0.0127	0.0078	0.055
545.8	1.39552	1.33052	1.49064	0.977315	0.979572	0.97925	1.27475	1.13371	1.34605	0.990913	0.825287	0.979499			545.8	1.41093	1.16374	1.22649	0.986388	0.985236	0.985847	1.17403	0.998712	1.0439	1.0887	0.980216	0.950602			91.6	0.0253	0.034	0.0268	0.1258	0.0604	0.0427	0.1446	0.1101	0.1234	0.1381	0.1105	0.1389			91.6	0.0256	0.0135	0.0082	0.0553
546	1.39552	1.33104	1.49123	0.978655	0.980872	0.980717	1.2748	1.13384	1.34601	0.992179	0.826358	0.980762			546	1.41156	1.1643	1.2273	0.987324	0.986264	0.986836	1.17422	0.999073	1.04409	1.08949	0.980977	0.951332			92	0.024	0.0337	0.0275	0.1272	0.0606	0.0435	0.146	0.1096	0.1242	0.1393	0.111	0.1382			92	0.0263	0.013	0.008	0.0546
546.2	1.39559	1.33142	1.49214	0.980198	0.982472	0.982201	1.27478	1.13387	1.34588	0.993573	0.827589	0.982395			546.2	1.41246	1.16512	1.22818	0.988309	0.987497	0.988032	1.17425	0.999406	1.04439	1.09069	0.98205	0.952204			92.4	0.0242	0.0342	0.0268	0.1259	0.0609	0.0436	0.1447	0.1098	0.1259	0.1399	0.1108	0.1388			92.4	0.0261	0.0131	0.0086	0.0559
546.4	1.39559	1.33179	1.49284	0.981285	0.983639	0.983332	1.27472	1.13377	1.34583	0.994578	0.828376	0.983442			546.4	1.41314	1.16564	1.22873	0.989121	0.988459	0.989046	1.17413	0.999657	1.04448	1.09151	0.982749	0.953231			92.8	0.025	0.0334	0.0271	0.126	0.0616	0.0439	0.1448	0.1096	0.1252	0.1405	0.1102	0.1379			92.8	0.0267	0.0129	0.0078	0.0555
546.6	1.3955	1.33215	1.4933	0.982722	0.985039	0.984544	1.27454	1.13344	1.34556	0.995913	0.829423	0.984643			546.6	1.41383	1.16633	1.22927	0.990231	0.989714	0.990153	1.17433	0.999971	1.04454	1.09249	0.983473	0.954485			93.2	0.0251	0.0337	0.0274	0.1259	0.0618	0.0436	0.1447	0.1104	0.1258	0.1398	0.1104	0.1388			93.2	0.0268	0.0139	0.0088	0.0552
546.8	1.39521	1.33245	1.49366	0.983917	0.986101	0.98557	1.27434	1.1331	1.34535	0.996945	0.830216	0.985808			546.8	1.41432	1.16698	1.22972	0.991225	0.990701	0.990988	1.17411	1.00028	1.04452	1.09309	0.984011	0.955122			93.6	0.0248	0.0341	0.027	0.1269	0.0617	0.0438	0.1457	0.1113	0.1258	0.1388	0.111	0.139			93.6	0.026	0.0127	0.0072	0.0559
547	1.39495	1.33286	1.49416	0.985161	0.987348	0.986812	1.27397	1.13294	1.34506	0.998038	0.831267	0.987133			547	1.4148	1.16774	1.23009	0.992076	0.991925	0.991876	1.17421	1.00036	1.04442	1.09367	0.984649	0.955915			94	0.0253	0.035	0.0275	0.1273	0.0625	0.0439	0.1461	0.1112	0.1271	0.1389	0.1114	0.1385			94	0.0259	0.0129	0.0081	0.0567
547.2	1.39486	1.33324	1.49462	0.986227	0.98818	0.987745	1.27375	1.13277	1.34478	0.998884	0.831976	0.988051			547.2	1.41513	1.16823	1.23051	0.992771	0.99281	0.992607	1.17416	1.00036	1.04438	1.09423	0.985063	0.956404			94.4	0.0248	0.0343	0.0271	0.1274	0.0625	0.0448	0.1462	0.1117	0.1276	0.1394	0.1101	0.1388			94.4	0.0265	0.0132	0.0088	0.0562
547.4	1.39484	1.33341	1.49522	0.987418	0.98909	0.988828	1.27356	1.13286	1.34432	0.999908	0.832787	0.989013			547.4	1.41589	1.16863	1.23123	0.99364	0.993759	0.99344	1.17391	1.00062	1.04452	1.09482	0.985717	0.957081			94.8	0.0254	0.0349	0.0277	0.1258	0.0623	0.0449	0.1446	0.1107	0.1285	0.1404	0.1108	0.1399			94.8	0.0267	0.0131	0.0088	0.0552
547.6	1.39432	1.33344	1.49522	0.988899	0.990646	0.989982	1.27317	1.13253	1.34386	1.00099	0.833823	0.990084			547.6	1.41648	1.16908	1.23187	0.994381	0.994733	0.994233	1.17383	1.00054	1.04423	1.09561	0.986408	0.957915			95.2	0.0261	0.0353	0.0268	0.1275	0.0624	0.045	0.1463	0.1106	0.1284	0.1399	0.111	0.1397			95.2	0.0274	0.0138	0.0083	0.0562
547.8	1.39407	1.33351	1.49513	0.989439	0.991254	0.990726	1.27289	1.13213	1.34367	1.00154	0.8343	0.990536			547.8	1.41682	1.16955	1.23194	0.99484	0.995326	0.994453	1.17345	1.00057	1.04425	1.09578	0.98673	0.958237			95.6	0.026	0.0344	0.0283	0.1266	0.0632	0.0442	0.1454	0.1109	0.1295	0.1405	0.111	0.138			95.6	0.0277	0.0147	0.0084	0.0561
548	1.39367	1.3335	1.49493	0.990899	0.992521	0.991806	1.27236	1.13134	1.34271	1.00263	0.83529	0.991433			548	1.41683	1.16968	1.23238	0.995594	0.996255	0.995099	1.17295	1.0001	1.04411	1.09643	0.987303	0.958789			96	0.0264	0.0355	0.0278	0.1291	0.0632	0.045	0.1479	0.1107	0.129	0.1399	0.1119	0.1386			96	0.0265	0.014	0.009	0.0569
548.2	1.39338	1.33364	1.49494	0.991636	0.993273	0.992415	1.27207	1.13077	1.34221	1.00311	0.835708	0.99185			548.2	1.41707	1.16959	1.23249	0.996116	0.996539	0.995578	1.17299	1.00003	1.04392	1.09658	0.987467	0.958958			96.4	0.0267	0.0357	0.0292	0.127	0.0642	0.0453	0.1458	0.1113	0.1299	0.1399	0.1117	0.1388			96.4	0.0266	0.0138	0.0079	0.0566
548.4	1.39293	1.33359	1.49462	0.992882	0.994449	0.993414	1.27113	1.13011	1.34125	1.004	0.836628	0.992727			548.4	1.417	1.16984	1.23279	0.996678	0.997329	0.996395	1.17317	0.999703	1.04325	1.09688	0.987795	0.959517			96.8	0.0268	0.0368	0.0277	0.1278	0.0631	0.0457	0.1466	0.1109	0.131	0.1399	0.1113	0.1384			96.8	0.0273	0.0143	0.0086	0.0571
548.6	1.39241	1.33317	1.49449	0.993717	0.995077	0.99401	1.27099	1.12967	1.34053	1.00423	0.837249	0.993249			548.6	1.41684	1.16994	1.23274	0.997058	0.997738	0.996894	1.17294	0.999493	1.04287	1.09713	0.987904	0.959664			97.2	0.0276	0.0362	0.0281	0.1271	0.0637	0.0465	0.1459	0.1118	0.13	0.1404	0.1106	0.1395			97.2	0.0271	0.0135	0.0082	0.0566
548.8	1.39191	1.33251	1.49394	0.994562	0.995871	0.994962	1.2706	1.12894	1.33982	1.00467	0.837801	0.993758			548.8	1.41655	1.17006	1.23262	0.997564	0.998	0.997544	1.1726	0.999364	1.04272	1.0971	0.988252	0.959852			97.6	0.0269	0.0363	0.0291	0.1278	0.0637	0.0455	0.1466	0.1117	0.1315	0.1403	0.1114	0.1385			97.6	0.0279	0.0143	0.0092	0.0574
549	1.3913	1.33208	1.49364	0.995275	0.996333	0.995747	1.27004	1.12842	1.33917	1.00508	0.838104	0.994033			549	1.41643	1.17004	1.2326	0.998076	0.998259	0.998067	1.17212	0.998898	1.04239	1.09726	0.988479	0.959858			98	0.027	0.0358	0.0288	0.1283	0.0655	0.0455	0.1471	0.1117	0.1309	0.1393	0.1111	0.1389			98	0.0279	0.0143	0.0087	0.0566
549.2	1.39055	1.33175	1.49292	0.996022	0.996973	0.99643	1.26918	1.12751	1.33853	1.00561	0.838449	0.994538			549.2	1.41644	1.16994	1.23257	0.998515	0.99864	0.998609	1.17156	0.998282	1.04182	1.09741	0.988482	0.959796			98.4	0.0278	0.0367	0.0286	0.1282	0.0652	0.0467	0.147	0.1125	0.1313	0.1403	0.1114	0.1389			98.4	0.0276	0.0139	0.009	0.0577
549.4	1.38983	1.33154	1.49253	0.99663	0.997414	0.99677	1.2684	1.12665	1.33776	1.00598	0.838698	0.994549			549.4	1.41623	1.16996	1.23262	0.998667	0.998862	0.998868	1.17106	0.997811	1.04163	1.09742	0.98854	0.959864			98.8	0.027	0.0373	0.0284	0.1279	0.0662	0.0463	0.1467	0.1117	0.1319	0.1407	0.1122	0.14			98.8	0.0272	0.0137	0.009	0.0581
549.6	1.38888	1.33133	1.49185	0.997267	0.997941	0.997337	1.26726	1.12564	1.33665	1.00633	0.838911	0.994649			549.6	1.41588	1.16981	1.23252	0.999064	0.999312	0.999285	1.17035	0.997274	1.04141	1.09735	0.988447	0.960069			99.2	0.0279	0.0374	0.0293	0.129	0.0655	0.0474	0.1478	0.1131	0.134	0.1399	0.1112	0.1389			99.2	0.0279	0.0143	0.0088	0.0584
549.8	1.38825	1.33098	1.49115	0.997925	0.998308	0.997633	1.26645	1.12495	1.33581	1.00673	0.839267	0.994935			549.8	1.41581	1.16956	1.23246	0.999309	0.999608	0.999375	1.16979	0.996923	1.041	1.09721	0.988355	0.95975			99.6	0.0273	0.0369	0.0282	0.1285	0.0662	0.0475	0.1473	0.1119	0.1334	0.1404	0.1112	0.1388			99.6	0.0274	0.0151	0.0094	0.0582
550	1.38763	1.33048	1.49063	0.998643	0.99876	0.998238	1.26531	1.12416	1.33495	1.00711	0.839646	0.995275			550	1.41563	1.16924	1.23215	0.999632	0.999854	0.999464	1.16904	0.996212	1.04064	1.09697	0.988337	0.959504			100	0.0285	0.0366	0.0299	0.1291	0.0666	0.047	0.1479	0.1126	0.1344	0.1403	0.1112	0.1389			100	0.0278	0.0155	0.0089	0.0586
550.2	1.38627	1.32955	1.48896	0.998966	0.999022	0.998662	1.26411	1.12305	1.33383	1.00749	0.839664	0.995208			550.2	1.41504	1.16851	1.23151	0.999581	0.999656	0.999618	1.1681	0.995407	1.04026	1.09698	0.988531	0.9596			100.4	0.0278	0.0371	0.0296	0.1283	0.0668	0.0468	0.1471	0.112	0.1341	0.1395	0.1117	0.1392			100.4	0.0279	0.0152	0.0091	0.0589
550.4	1.38546	1.329	1.48825	0.999403	0.999343	0.998928	1.26354	1.12221	1.33295	1.00768	0.839617	0.995238			550.4	1.41482	1.16795	1.23124	0.99968	0.99982	0.999779	1.16752	0.995122	1.03979	1.09666	0.98838	0.959556			100.8	0.0286	0.0371	0.0295	0.1292	0.0673	0.0478	0.148	0.1119	0.1346	0.1403	0.1114	0.1388			100.8	0.0272	0.0151	0.0099	0.0584
550.6	1.38392	1.32799	1.4869	0.999561	0.999449	0.999405	1.26203	1.12078	1.33129	1.0077	0.839654	0.995149			550.6	1.41417	1.1675	1.23074	0.999773	0.999865	1	1.16633	0.994296	1.03869	1.09624	0.988254	0.95947			101.2	0.0278	0.0373	0.0287	0.1284	0.0674	0.0473	0.1472	0.1134	0.1347	0.1399	0.1114	0.1384			101.2	0.0283	0.0147	0.009	0.0589
550.8	1.38317	1.32748	1.48605	0.999656	0.999673	0.999452	1.26129	1.11994	1.33056	1.00774	0.839705	0.995259			550.8	1.41372	1.16732	1.23017	0.99966	1	0.999954	1.16567	0.993699	1.03815	1.09629	0.988076	0.959358			101.6	0.0283	0.0383	0.029	0.1284	0.0671	0.0487	0.1472	0.114	0.1345	0.1402	0.1123	0.1392			101.6	0.0285	0.0151	0.0087	0.0581
551	1.3815	1.32642	1.48463	0.999927	0.999559	0.999872	1.25927	1.11882	1.32933	1.00775	0.839626	0.995044			551	1.41255	1.16681	1.22931	1	0.999794	0.999925	1.16424	0.992611	1.03733	1.09598	0.987571	0.959257			102	0.0282	0.0378	0.0297	0.1288	0.0676	0.0471	0.1476	0.1131	0.1363	0.1396	0.1108	0.1392			102	0.0291	0.0152	0.0089	0.0582
551.2	1.38017	1.32548	1.48373	1	0.999722	1	1.25804	1.11785	1.32836	1.00771	0.839708	0.994834			551.2	1.41188	1.16622	1.22884	0.999906	0.999493	0.999806	1.16345	0.992018	1.03656	1.0955	0.987373	0.958982			102.4	0.0287	0.037	0.0296	0.1291	0.0683	0.0482	0.1479	0.1129	0.1363	0.1407	0.1106	0.14			102.4	0.0285	0.0159	0.01	0.0592
551.4	1.37858	1.32429	1.48255	0.999737	1	0.99994	1.25666	1.11689	1.32742	1.00748	0.839682	0.994335			551.4	1.4109	1.16561	1.22816	0.999765	0.999228	0.999545	1.16255	0.991266	1.03561	1.09472	0.987036	0.958461			102.8	0.0288	0.0377	0.03	0.1296	0.0688	0.0485	0.1484	0.1132	0.1367	0.141	0.111	0.1392			102.8	0.0295	0.0156	0.009	0.0603
551.6	1.37736	1.32324	1.48146	0.999861	0.99974	0.999679	1.25577	1.11588	1.32643	1.0073	0.839443	0.994177			551.6	1.40993	1.16504	1.22746	0.999524	0.999033	0.999201	1.16142	0.990462	1.03518	1.09443	0.986624	0.958124			103.2	0.0286	0.0379	0.0302	0.1299	0.0687	0.0488	0.1487	0.1134	0.1364	0.1399	0.1125	0.1402			103.2	0.0294	0.0153	0.0098	0.0594
551.8	1.37572	1.32195	1.48006	0.999767	0.999682	0.999647	1.25473	1.11451	1.32507	1.00695	0.839215	0.993809			551.8	1.40896	1.16431	1.2268	0.999223	0.998661	0.998753	1.15994	0.989361	1.0346	1.09397	0.985993	0.957541			103.6	0.0297	0.0395	0.0296	0.1298	0.0691	0.0489	0.1486	0.1145	0.1377	0.1395	0.1118	0.1395			103.6	0.0294	0.0151	0.0095	0.0597
552	1.37424	1.3209	1.47871	0.999655	0.999675	0.999804	1.25328	1.11354	1.32402	1.0069	0.839078	0.993638			552	1.40808	1.16373	1.22631	0.999048	0.998222	0.998289	1.15889	0.98843	1.0338	1.09351	0.985872	0.956922			104	0.0297	0.0383	0.0299	0.1301	0.0688	0.0499	0.1489	0.114	0.1381	0.1392	0.1116	0.1402			104	0.0292	0.0156	0.0098	0.059
552.2	1.37233	1.31971	1.47709	0.999665	0.999264	0.999826	1.25171	1.11243	1.32251	1.00672	0.838722	0.993385			552.2	1.40714	1.16301	1.22537	0.998717	0.997811	0.997755	1.15761	0.987094	1.0327	1.09292	0.985222	0.956185			104.4	0.03	0.0396	0.0302	0.1298	0.0685	0.0488	0.1486	0.1134	0.139	0.1399	0.1111	0.1395			104.4	0.0286	0.016	0.0087	0.0597
552.4	1.37083	1.31861	1.47569	0.999498	0.999112	0.999396	1.25042	1.11146	1.32147	1.00632	0.838393	0.992996			552.4	1.40622	1.16232	1.2243	0.998456	0.997487	0.99735	1.1564	0.98642	1.03175	1.09222	0.984758	0.955756			104.8	0.0291	0.0386	0.0315	0.1286	0.069	0.0486	0.1474	0.113	0.1377	0.1397	0.1111	0.1399			104.8	0.0296	0.0159	0.0099	0.0593
552.6	1.36879	1.31705	1.4741	0.999483	0.999032	0.998897	1.24898	1.1103	1.32003	1.00568	0.837761	0.992309			552.6	1.40483	1.16127	1.22317	0.998246	0.997193	0.996803	1.15505	0.985481	1.03072	1.09134	0.984	0.955277			105.2	0.0303	0.0393	0.03	0.1304	0.0698	0.0493	0.1492	0.1137	0.1396	0.1399	0.111	0.1405			105.2	0.0295	0.0154	0.0094	0.0603
552.8	1.36663	1.3153	1.4719	0.999295	0.998663	0.998495	1.24701	1.10879	1.31824	1.00503	0.837224	0.991832			552.8	1.40331	1.1599	1.22183	0.997775	0.996839	0.996186	1.15353	0.984443	1.02949	1.09026	0.983268	0.954518			105.6	0.0293	0.0383	0.0304	0.1305	0.0706	0.0501	0.1493	0.1138	0.1392	0.1397	0.1123	0.1402			105.6	0.0293	0.0163	0.0101	0.0598
553	1.36546	1.3143	1.47094	0.999108	0.998449	0.998238	1.24616	1.10818	1.31763	1.00479	0.836929	0.991213			553	1.40236	1.15904	1.22115	0.997269	0.99649	0.995587	1.15284	0.98373	1.02896	1.08985	0.982928	0.954077			106	0.03	0.0393	0.0297	0.1305	0.0706	0.0503	0.1493	0.1146	0.1408	0.1398	0.112	0.1401			106	0.0288	0.0161	0.0093	0.0597
553.2	1.36268	1.3124	1.46841	0.99859	0.99788	0.997929	1.24422	1.10635	1.31553	1.00373	0.836238	0.990296			553.2	1.4	1.15779	1.21957	0.996745	0.995289	0.994754	1.15138	0.982054	1.02765	1.08859	0.982046	0.952894			106.4	0.0302	0.0387	0.0311	0.1319	0.071	0.0503	0.1507	0.1139	0.1406	0.1412	0.1117	0.1398			106.4	0.0305	0.0166	0.0099	0.0604
553.4	1.36076	1.31096	1.46699	0.998552	0.997569	0.997534	1.24297	1.10534	1.31424	1.00312	0.835817	0.989624			553.4	1.39869	1.15682	1.21848	0.996149	0.994778	0.994273	1.15006	0.981135	1.02676	1.08762	0.98127	0.951915			106.8	0.0304	0.0405	0.0308	0.1304	0.0709	0.0503	0.1492	0.1137	0.1403	0.1403	0.1116	0.1405			106.8	0.0298	0.0169	0.0086	0.0613
553.6	1.35854	1.30902	1.46523	0.998212	0.997312	0.997088	1.24142	1.10393	1.31266	1.00231	0.835273	0.988717			553.6	1.39703	1.15555	1.21723	0.995292	0.99392	0.993598	1.14847	0.98	1.02549	1.08645	0.980217	0.950545			107.2	0.0297	0.0399	0.0318	0.131	0.0717	0.0493	0.1498	0.1149	0.1396	0.1396	0.112	0.141			107.2	0.03	0.0165	0.0104	0.0603
553.8	1.35687	1.30769	1.46379	0.99776	0.99702	0.996506	1.24032	1.10286	1.3117	1.00146	0.834723	0.987941			553.8	1.39564	1.15464	1.2161	0.994591	0.993243	0.992909	1.14739	0.97914	1.025	1.08554	0.979434	0.949714			107.6	0.0305	0.0401	0.0311	0.1299	0.072	0.0508	0.1487	0.114	0.1399	0.1404	0.1129	0.1402			107.6	0.0297	0.0168	0.0099	0.0606
554	1.3546	1.30589	1.46169	0.997156	0.99659	0.995991	1.23885	1.10157	1.31046	1.00049	0.83419	0.987088			554	1.39424	1.15345	1.2149	0.993792	0.992481	0.991973	1.14603	0.978094	1.02411	1.08427	0.978158	0.948397			108	0.0314	0.0405	0.0314	0.131	0.0717	0.0514	0.1498	0.1142	0.1415	0.1394	0.113	0.1401			108	0.0306	0.0167	0.0108	0.0605
554.2	1.35255	1.3044	1.46003	0.996903	0.996371	0.995568	1.23762	1.10025	1.30931	0.999685	0.833619	0.986276			554.2	1.39296	1.15247	1.21392	0.992916	0.99182	0.991421	1.14468	0.977191	1.02341	1.0829	0.977617	0.947451			108.4	0.0311	0.0412	0.031	0.1319	0.0724	0.0513	0.1507	0.1145	0.1411	0.1393	0.1126	0.1405			108.4	0.03	0.0163	0.0099	0.062
554.4	1.35027	1.30253	1.45775	0.996393	0.995754	0.994825	1.23622	1.0987	1.30787	0.998566	0.833	0.98535			554.4	1.39117	1.15111	1.21251	0.991927	0.991053	0.990471	1.14287	0.975995	1.02233	1.08118	0.976829	0.946109			108.8	0.0309	0.0406	0.0315	0.1314	0.0734	0.0515	0.1502	0.1154	0.1412	0.1398	0.1124	0.14			108.8	0.0311	0.0173	0.011	0.0599
554.6	1.34846	1.3011	1.45595	0.995964	0.99518	0.994246	1.23523	1.0976	1.30657	0.997651	0.832138	0.98444			554.6	1.38978	1.15004	1.21118	0.991387	0.990567	0.989781	1.14178	0.974909	1.02156	1.07982	0.975906	0.944977			109.2	0.0305	0.041	0.0318	0.1324	0.0725	0.0515	0.1512	0.1135	0.1421	0.1404	0.1123	0.1393			109.2	0.0304	0.0168	0.0106	0.0612
554.8	1.34618	1.29931	1.45388	0.995763	0.994465	0.993605	1.2341	1.09612	1.30484	0.996449	0.831188	0.983445			554.8	1.38806	1.14851	1.20957	0.990592	0.989655	0.988941	1.14037	0.973584	1.02035	1.07822	0.974531	0.94359			109.6	0.0306	0.0407	0.0312	0.1316	0.0732	0.0519	0.1504	0.1143	0.143	0.1389	0.1128	0.1401			109.6	0.0306	0.0168	0.0104	0.0606
555	1.34307	1.29659	1.4513	0.994942	0.993715	0.993033	1.23211	1.09447	1.30308	0.99494	0.83007	0.981887			555	1.38594	1.14662	1.20746	0.989545	0.988458	0.988081	1.13879	0.972245	1.01857	1.07632	0.972858	0.941761			110	0.0312	0.0413	0.0317	0.1306	0.073	0.0519	0.1494	0.1142	0.1429	0.1406	0.1124	0.1401			110	0.0309	0.0169	0.0105	0.062
555.2	1.34167	1.29534	1.45007	0.994552	0.993142	0.992508	1.23106	1.09369	1.30238	0.994267	0.829435	0.981063			555.2	1.38468	1.1457	1.20633	0.988831	0.987976	0.987518	1.13784	0.971587	1.01786	1.0753	0.971922	0.941137			110.4	0.0319	0.0401	0.0315	0.1311	0.074	0.0526	0.1499	0.1145	0.1441	0.1399	0.1128	0.1403			110.4	0.0304	0.0169	0.0108	0.0612
555.4	1.33841	1.29288	1.44716	0.993798	0.992049	0.991219	1.22932	1.09182	1.30055	0.992646	0.828065	0.979348			555.4	1.38229	1.14368	1.20413	0.987752	0.986907	0.986315	1.13602	0.970162	1.01665	1.07341	0.969962	0.939748			110.8	0.0327	0.0418	0.0317	0.1313	0.0729	0.0526	0.1501	0.115	0.1432	0.1401	0.1121	0.14			110.8	0.0311	0.0174	0.0104	0.062
555.6	1.3363	1.29121	1.44516	0.993071	0.991631	0.990564	1.2283	1.09071	1.29947	0.99154	0.827219	0.978284			555.6	1.38048	1.1422	1.2029	0.987018	0.986194	0.985425	1.13488	0.969219	1.01588	1.07204	0.96872	0.938567			111.2	0.031	0.042	0.0324	0.1314	0.0748	0.053	0.1502	0.1152	0.1454	0.1394	0.1125	0.1389			111.2	0.0307	0.0182	0.0106	0.0617
555.8	1.33365	1.28919	1.44283	0.992106	0.990884	0.989997	1.22695	1.08932	1.29782	0.990247	0.826302	0.976749			555.8	1.37821	1.14051	1.20129	0.985912	0.985212	0.984133	1.13366	0.96782	1.01502	1.07037	0.967059	0.936902			111.6	0.0317	0.0417	0.0325	0.132	0.0742	0.0526	0.1508	0.1146	0.1445	0.1396	0.1126	0.1407			111.6	0.0308	0.0171	0.0104	0.0621
556	1.33146	1.28736	1.44081	0.991295	0.990083	0.989294	1.22601	1.08813	1.29683	0.989219	0.825284	0.975516			556	1.37662	1.13925	1.19977	0.984846	0.984221	0.98306	1.13237	0.966808	1.01437	1.06878	0.965821	0.93575			112	0.0313	0.0416	0.0328	0.1323	0.075	0.0528	0.1511	0.1145	0.1449	0.1408	0.1125	0.1402			112	0.031	0.0174	0.0109	0.0624
556.2	1.32861	1.28485	1.43801	0.990447	0.989093	0.988278	1.22452	1.08669	1.29552	0.987751	0.824202	0.974009			556.2	1.37459	1.13788	1.19801	0.983568	0.98324	0.981757	1.13083	0.965244	1.01337	1.06686	0.964251	0.933867			112.4	0.0327	0.0417	0.0325	0.1316	0.0739	0.0525	0.1504	0.1147	0.1449	0.1402	0.1122	0.1401			112.4	0.0307	0.0176	0.0106	0.0626
556.4	1.32632	1.28297	1.43599	0.989802	0.988398	0.987406	1.22341	1.08541	1.29454	0.986462	0.823116	0.972743			556.4	1.37284	1.13645	1.19656	0.982908	0.982359	0.980758	1.12962	0.964058	1.0123	1.06543	0.962744	0.932631			112.8	0.0327	0.0413	0.0321	0.1317	0.0754	0.0534	0.1505	0.1151	0.1455	0.1393	0.1133	0.1394			112.8	0.0307	0.0176	0.0112	0.0619
556.6	1.32347	1.28061	1.43345	0.988972	0.987478	0.986414	1.22201	1.08391	1.29347	0.984889	0.82178	0.970927			556.6	1.37058	1.13462	1.19477	0.981878	0.981533	0.979349	1.12824	0.962954	1.01102	1.06367	0.961002	0.931135			113.2	0.0333	0.0428	0.0324	0.1319	0.0744	0.0535	0.1507	0.1156	0.1464	0.1397	0.1124	0.141			113.2	0.0322	0.017	0.0107	0.0617
556.8	1.32138	1.27863	1.43129	0.98805	0.986472	0.985542	1.22105	1.08279	1.29264	0.983633	0.820694	0.969682			556.8	1.36882	1.13291	1.19354	0.980945	0.980591	0.978236	1.12734	0.962014	1.01014	1.06222	0.959591	0.929946			113.6	0.033	0.0422	0.0331	0.132	0.0757	0.0543	0.1508	0.1146	0.1453	0.1398	0.1109	0.1398			113.6	0.0308	0.018	0.0108	0.0623
557	1.31853	1.27611	1.42854	0.987122	0.985206	0.984507	1.2196	1.08156	1.29145	0.981933	0.819039	0.968049			557	1.36671	1.13091	1.19157	0.979858	0.979417	0.976727	1.12603	0.960708	1.00921	1.06021	0.957752	0.928349			114	0.0331	0.0431	0.0321	0.132	0.0752	0.0538	0.1508	0.116	0.1466	0.1399	0.1125	0.1401			114	0.0325	0.0187	0.0112	0.0627
557.2	1.31489	1.27262	1.4249	0.986255	0.983796	0.98314	1.21787	1.08007	1.28981	0.980388	0.817321	0.965996			557.2	1.3639	1.12834	1.18914	0.978425	0.978024	0.974902	1.12437	0.959217	1.00774	1.05818	0.95558	0.926131			114.4	0.0325	0.0422	0.0326	0.1317	0.0764	0.0538	0.1505	0.1148	0.1458	0.1406	0.1121	0.1403			114.4	0.0316	0.018	0.0108	0.0624
557.4	1.31326	1.27096	1.4232	0.985903	0.983112	0.982268	1.2171	1.07926	1.28921	0.979459	0.816348	0.96493			557.4	1.3621	1.12701	1.1876	0.977697	0.977239	0.97407	1.12331	0.958392	1.00725	1.05691	0.954609	0.925107			114.8	0.0335	0.0432	0.0327	0.1312	0.0753	0.0546	0.15	0.1152	0.1461	0.1405	0.1127	0.1401			114.8	0.0326	0.0182	0.0113	0.063
557.6	1.30972	1.26789	1.41976	0.984495	0.981193	0.980488	1.21593	1.07793	1.28805	0.977114	0.814571	0.96253			557.6	1.35903	1.12453	1.18498	0.976284	0.97547	0.972178	1.12218	0.957104	1.00629	1.05402	0.952067	0.922618			115.2	0.0332	0.0433	0.033	0.1318	0.0773	0.0553	0.1506	0.1155	0.147	0.1394	0.1123	0.1398			115.2	0.0316	0.0187	0.0116	0.0636
557.8	1.30732	1.2657	1.41747	0.983593	0.980314	0.979609	1.2149	1.07693	1.28727	0.975927	0.813246	0.961221			557.8	1.357	1.12283	1.18333	0.975106	0.974242	0.971118	1.12116	0.956039	1.00537	1.05247	0.950588	0.921143			115.6	0.0337	0.0433	0.0328	0.1332	0.076	0.0545	0.152	0.1159	0.1467	0.1398	0.1125	0.1402			115.6	0.0314	0.0178	0.0111	0.0627
558	1.30422	1.26292	1.41455	0.982524	0.979119	0.978413	1.21357	1.07565	1.28629	0.974243	0.81169	0.959483			558	1.35448	1.12078	1.18128	0.973349	0.972858	0.969821	1.11957	0.954873	1.00427	1.05056	0.94856	0.919186			116	0.0336	0.0436	0.0337	0.1326	0.077	0.0557	0.1514	0.1149	0.1472	0.1394	0.1125	0.1408			116	0.0319	0.0186	0.0118	0.0639
558.2	1.30144	1.26088	1.41189	0.981455	0.977976	0.977412	1.21242	1.07475	1.28583	0.972825	0.810473	0.95783			558.2	1.35241	1.11888	1.17963	0.972146	0.971494	0.968599	1.11834	0.953918	1.00371	1.0487	0.94713	0.917709			116.4	0.0339	0.0444	0.0335	0.1331	0.0779	0.0542	0.1519	0.1158	0.147	0.139	0.1117	0.1405			116.4	0.0326	0.0191	0.0119	0.0632
558.4	1.29827	1.25826	1.40863	0.980255	0.976678	0.97612	1.21108	1.07387	1.28549	0.971185	0.808759	0.95586			558.4	1.34981	1.11645	1.17754	0.970738	0.970095	0.966975	1.11685	0.952838	1.00345	1.04644	0.945056	0.915872			116.8	0.0332	0.0436	0.0324	0.1316	0.0778	0.055	0.1504	0.1153	0.1475	0.1399	0.1126	0.1408			116.8	0.0319	0.019	0.0111	0.0642
558.6	1.29563	1.25609	1.40577	0.979245	0.975691	0.975164	1.2105	1.0732	1.28484	0.969675	0.807574	0.95426			558.6	1.34766	1.11477	1.17592	0.969531	0.968745	0.965648	1.11599	0.951981	1.00275	1.04454	0.943564	0.914105			117.2	0.0348	0.0437	0.0338	0.1322	0.077	0.0555	0.151	0.1154	0.1478	0.1399	0.1118	0.1404			117.2	0.0327	0.0186	0.0119	0.064
558.8	1.29267	1.25334	1.40257	0.977861	0.974469	0.973731	1.20973	1.07225	1.28443	0.967657	0.806203	0.952064			558.8	1.34506	1.11251	1.1736	0.967745	0.967064	0.964098	1.11482	0.950797	1.00205	1.042	0.941575	0.911998			117.6	0.034	0.0444	0.0335	0.1328	0.0775	0.056	0.1516	0.1162	0.1489	0.1398	0.1123	0.1411			117.6	0.0317	0.0192	0.011	0.0637
559	1.28988	1.25119	1.39989	0.976877	0.97325	0.972599	1.20886	1.07145	1.28408	0.966165	0.80489	0.950493			559	1.34296	1.11077	1.17157	0.966312	0.965712	0.962738	1.11384	0.95012	1.0013	1.04013	0.940004	0.910235			118	0.035	0.0438	0.0334	0.1321	0.0779	0.0554	0.1509	0.1157	0.1498	0.1398	0.112	0.1401			118	0.0325	0.0193	0.0118	0.0633
559.2	1.28646	1.24839	1.39647	0.975526	0.971667	0.971055	1.20799	1.07048	1.28383	0.964251	0.803201	0.948595			559.2	1.3402	1.10837	1.16931	0.964705	0.96397	0.961131	1.11246	0.949348	1.00039	1.03778	0.937866	0.907991			118.4	0.0352	0.0435	0.0333	0.1325	0.0783	0.0565	0.1513	0.1168	0.1492	0.1407	0.1128	0.1401			118.4	0.032	0.0194	0.0116	0.0645
559.4	1.28266	1.24485	1.3927	0.973831	0.969918	0.969412	1.20719	1.06956	1.28364	0.961535	0.801454	0.946118			559.4	1.33643	1.10558	1.16626	0.96296	0.961957	0.95915	1.11095	0.948134	0.99919	1.03511	0.935159	0.905155			118.8	0.0342	0.0445	0.034	0.1331	0.0788	0.0557	0.1519	0.1157	0.1488	0.1393	0.1126	0.1404			118.8	0.0327	0.0194	0.0124	0.0642
559.6	1.28063	1.24337	1.39062	0.972831	0.968777	0.968627	1.20708	1.06915	1.2834	0.960489	0.800205	0.944877			559.6	1.33489	1.10385	1.1645	0.962052	0.960706	0.958205	1.11008	0.947441	0.99891	1.0336	0.933758	0.904037			119.2	0.0342	0.0442	0.033	0.1324	0.0793	0.0562	0.1512	0.1157	0.1483	0.1396	0.1133	0.1412			119.2	0.0318	0.0188	0.0107	0.0651
559.8	1.27698	1.23931	1.38641	0.971108	0.966712	0.967038	1.20663	1.06846	1.28307	0.957926	0.798226	0.942317			559.8	1.33144	1.10085	1.16165	0.959709	0.95842	0.955937	1.10873	0.946589	0.998249	1.0304	0.931562	0.901221			119.6	0.0346	0.0451	0.0345	0.1329	0.0795	0.057	0.1517	0.1159	0.1503	0.1398	0.1125	0.1406			119.6	0.0333	0.0186	0.0113	0.0646
560	1.27414	1.2369	1.3836	0.969812	0.965267	0.965657	1.20621	1.06827	1.28296	0.956126	0.796597	0.940679			560	1.32904	1.09899	1.15956	0.958109	0.95713	0.954587	1.10801	0.945887	0.998068	1.02835	0.929864	0.899456			120	0.0347	0.0455	0.0345	0.1326	0.079	0.0564	0.1514	0.1163	0.1502	0.1405	0.1125	0.1405			120	0.032	0.0198	0.0115	0.0652
560.2	1.27032	1.23373	1.3798	0.968161	0.963605	0.964009	1.2055	1.0678	1.28288	0.953963	0.7948	0.93852			560.2	1.32599	1.09659	1.15683	0.956163	0.955506	0.952857	1.10693	0.945094	0.997477	1.026	0.927792	0.896959			120.4	0.0346	0.0449	0.0351	0.1339	0.0796	0.0571	0.1527	0.1162	0.1496	0.1411	0.1132	0.1399			120.4	0.033	0.02	0.012	0.0644
560.4	1.2676	1.23127	1.37681	0.966813	0.962403	0.962648	1.20535	1.06717	1.2832	0.952236	0.793593	0.936844			560.4	1.32337	1.09477	1.15481	0.954524	0.954078	0.951468	1.10625	0.944387	0.997094	1.02383	0.926143	0.895366			120.8	0.0358	0.0447	0.0342	0.1327	0.08	0.0563	0.1515	0.1161	0.1505	0.14	0.1116	0.1399			120.8	0.033	0.0202	0.0111	0.0648
560.6	1.26427	1.22844	1.37305	0.964954	0.960716	0.961019	1.20525	1.06638	1.28385	0.949919	0.791842	0.93451			560.6	1.32018	1.09235	1.15196	0.952579	0.952121	0.949594	1.10551	0.943475	0.996709	1.02121	0.923971	0.89313			121.2	0.0356	0.0459	0.0352	0.1342	0.0796	0.0574	0.153	0.1158	0.1495	0.1395	0.1117	0.1408			121.2	0.032	0.0199	0.0115	0.066
560.8	1.26145	1.22592	1.37009	0.963486	0.959359	0.959814	1.20518	1.06625	1.28433	0.94813	0.790348	0.932597			560.8	1.31771	1.09031	1.14993	0.950932	0.950588	0.948088	1.10497	0.942787	0.996504	1.01945	0.922119	0.891463			121.6	0.0353	0.0462	0.0346	0.1333	0.0804	0.058	0.1521	0.116	0.1508	0.1407	0.1123	0.1412			121.6	0.0328	0.0203	0.0116	0.0653
561	1.25782	1.22262	1.36619	0.961463	0.957808	0.95831	1.20507	1.0661	1.28475	0.945978	0.78838	0.930178			561	1.31474	1.08764	1.14712	0.948823	0.948647	0.946329	1.10448	0.942078	0.995918	1.01707	0.919951	0.889012			122	0.0349	0.0464	0.0345	0.1331	0.0801	0.0577	0.1519	0.1162	0.151	0.1402	0.1133	0.141			122	0.0333	0.0197	0.0121	0.0648
561.2	1.25479	1.21999	1.36333	0.960176	0.956374	0.956864	1.20513	1.06617	1.28511	0.943987	0.786968	0.928228			561.2	1.31239	1.0854	1.14487	0.947129	0.946889	0.944684	1.10385	0.941807	0.995579	1.01515	0.917857	0.887036			122.4	0.0357	0.0452	0.0352	0.1335	0.0811	0.0577	0.1523	0.1161	0.1505	0.1398	0.113	0.1413			122.4	0.0331	0.0201	0.0115	0.0658
561.4	1.25102	1.21672	1.35952	0.958465	0.954509	0.955072	1.20533	1.06624	1.28559	0.941494	0.784857	0.92566			561.4	1.30929	1.08259	1.14202	0.944991	0.944766	0.94235	1.10324	0.941443	0.995282	1.0125	0.915346	0.884484			122.8	0.036	0.0458	0.0353	0.1342	0.0805	0.0575	0.153	0.1172	0.1514	0.1394	0.1138	0.1405			122.8	0.0332	0.0204	0.0121	0.065
561.6	1.24681	1.21246	1.35463	0.956329	0.952204	0.952981	1.20599	1.06622	1.28664	0.938696	0.782459	0.922653			561.6	1.30548	1.07985	1.13871	0.942188	0.942371	0.939833	1.10254	0.940837	0.995092	1.00958	0.912217	0.881402			123.2	0.0367	0.0456	0.0345	0.1331	0.0808	0.0586	0.1519	0.1163	0.1519	0.1398	0.1122	0.1406			123.2	0.0337	0.0204	0.0119	0.0668
561.8	1.24379	1.20957	1.35149	0.954652	0.950542	0.951388	1.20612	1.06625	1.28742	0.936634	0.781048	0.920692			561.8	1.30262	1.07786	1.13631	0.940437	0.940874	0.938179	1.10233	0.940381	0.99482	1.00737	0.910463	0.87933			123.6	0.0361	0.047	0.035	0.1335	0.0811	0.0588	0.1523	0.1157	0.1523	0.1396	0.1123	0.141			123.6	0.0337	0.0205	0.0128	0.0663
562	1.2401	1.2059	1.34764	0.952819	0.948651	0.949391	1.20645	1.06638	1.28855	0.93422	0.778968	0.918191			562	1.29899	1.07503	1.13334	0.938462	0.938972	0.936167	1.10194	0.939714	0.994698	1.00472	0.908308	0.876862			124	0.0368	0.0466	0.0354	0.1327	0.0819	0.0587	0.1515	0.1162	0.1521	0.1416	0.1136	0.1403			124	0.0331	0.0212	0.0121	0.0665
562.2	1.23704	1.20294	1.34445	0.951419	0.947208	0.947995	1.20696	1.0667	1.2893	0.932246	0.777462	0.916185			562.2	1.29633	1.07268	1.13097	0.936766	0.937355	0.934466	1.10155	0.939396	0.994894	1.00267	0.906216	0.874534			124.4	0.0352	0.047	0.0357	0.1334	0.0826	0.0585	0.1522	0.1167	0.1516	0.1397	0.114	0.1413			124.4	0.0344	0.0198	0.0126	0.0652
562.4	1.23336	1.19923	1.34049	0.949594	0.945233	0.946038	1.20759	1.06734	1.29048	0.929596	0.775418	0.913381			562.4	1.29296	1.0699	1.12843	0.934527	0.935388	0.932408	1.1013	0.939081	0.994935	0.999893	0.903515	0.871857			124.8	0.0375	0.0466	0.0358	0.1341	0.0822	0.0592	0.1529	0.1158	0.1524	0.1404	0.1129	0.1397			124.8	0.0341	0.0202	0.0124	0.0664
562.6	1.23022	1.19627	1.33717	0.948099	0.943678	0.944525	1.20806	1.06784	1.29166	0.927388	0.773684	0.911076			562.6	1.2903	1.06792	1.12587	0.932673	0.933662	0.930731	1.10131	0.938951	0.995047	0.997655	0.90157	0.870053			125.2	0.0373	0.046	0.0359	0.1344	0.0816	0.0589	0.1532	0.1169	0.1521	0.1394	0.1133	0.1409			125.2	0.0335	0.0209	0.0137	0.0669
562.8	1.22633	1.19284	1.33302	0.946258	0.941718	0.942603	1.20885	1.06852	1.29312	0.924963	0.771416	0.90836			562.8	1.28705	1.06501	1.1228	0.930235	0.931372	0.928541	1.10126	0.938777	0.995286	0.994889	0.899071	0.867718			125.6	0.0368	0.0464	0.0359	0.1342	0.0834	0.0592	0.153	0.1167	0.1535	0.141	0.113	0.1402			125.6	0.0334	0.0206	0.0121	0.0668
563	1.22309	1.19029	1.32978	0.944689	0.94013	0.940959	1.20961	1.06926	1.29474	0.922787	0.769914	0.906074			563	1.28419	1.06288	1.12044	0.928266	0.929642	0.926771	1.10131	0.938906	0.995576	0.992857	0.896942	0.865325			126	0.0365	0.0477	0.0355	0.135	0.0829	0.0598	0.1538	0.1168	0.1528	0.1398	0.1133	0.1406			126	0.0343	0.0203	0.0128	0.0668
563.2	1.21893	1.18702	1.32571	0.942515	0.938148	0.938923	1.21063	1.07032	1.29663	0.920131	0.767758	0.903462			563.2	1.28061	1.06008	1.11729	0.92565	0.927515	0.924874	1.10125	0.939002	0.995922	0.990412	0.894287	0.862711			126.4	0.0372	0.0461	0.0357	0.1343	0.0825	0.0594	0.1531	0.1171	0.1537	0.1397	0.1132	0.141			126.4	0.0346	0.0198	0.0125	0.0659
563.4	1.2143	1.1827	1.32072	0.940037	0.936038	0.936372	1.21239	1.07132	1.29914	0.917218	0.765369	0.900017			563.4	1.27655	1.05652	1.11359	0.922968	0.924853	0.922241	1.10128	0.938825	0.9963	0.987196	0.891138	0.859623			126.8	0.0375	0.0476	0.0369	0.134	0.0834	0.0596	0.1528	0.1166	0.1539	0.1408	0.1126	0.141			126.8	0.0342	0.0205	0.0128	0.066
563.6	1.21124	1.17986	1.31768	0.938469	0.934437	0.934578	1.21378	1.07226	1.30094	0.915123	0.763721	0.897573			563.6	1.27366	1.05435	1.11146	0.921094	0.922865	0.920524	1.10151	0.938808	0.996713	0.984722	0.888998	0.857411			127.2	0.0374	0.0475	0.036	0.1337	0.0846	0.0607	0.1525	0.1171	0.1538	0.1399	0.114	0.1409			127.2	0.0343	0.0212	0.0128	0.0668
563.8	1.20735	1.17654	1.31384	0.936358	0.932278	0.932389	1.21579	1.07372	1.30323	0.912509	0.761671	0.894432			563.8	1.2701	1.05135	1.10836	0.91883	0.920575	0.918431	1.10206	0.938857	0.997405	0.981812	0.886327	0.854435			127.6	0.0385	0.0476	0.0369	0.1336	0.0833	0.0599	0.1524	0.1165	0.1547	0.141	0.1126	0.1404			127.6	0.0349	0.021	0.0124	0.067
564	1.20424	1.17368	1.31069	0.934628	0.930582	0.93056	1.21696	1.07501	1.30528	0.910459	0.760324	0.892316			564	1.26705	1.04897	1.10582	0.916893	0.918794	0.916771	1.10239	0.93908	0.998187	0.979659	0.884263	0.852035			128	0.0381	0.0478	0.0357	0.1333	0.0846	0.0607	0.1521	0.117	0.1538	0.1403	0.1135	0.1413			128	0.0346	0.0207	0.0128	0.0661
564.2	1.20013	1.17016	1.30664	0.932708	0.928327	0.928244	1.21886	1.07661	1.30805	0.908012	0.758338	0.889547			564.2	1.26339	1.04599	1.10301	0.914528	0.91669	0.914462	1.10291	0.939327	0.999035	0.976881	0.881763	0.849071			128.4	0.0377	0.0483	0.0364	0.1344	0.0833	0.0596	0.1532	0.1164	0.1542	0.141	0.1131	0.141			128.4	0.0353	0.0215	0.0133	0.0673
564.4	1.197	1.16702	1.30336	0.930945	0.926522	0.926432	1.22055	1.07791	1.31095	0.906048	0.75667	0.887246			564.4	1.2604	1.04372	1.1005	0.912745	0.914991	0.912554	1.10344	0.939471	1.00028	0.974614	0.879905	0.8468			128.8	0.0376	0.0483	0.0367	0.1341	0.0845	0.0608	0.1529	0.117	0.1535	0.1398	0.1127	0.1415			128.8	0.0353	0.0212	0.0126	0.0668
564.6	1.1931	1.16336	1.2988	0.928752	0.924304	0.924053	1.22284	1.07939	1.3146	0.903424	0.754727	0.884087			564.6	1.25653	1.04085	1.09729	0.910353	0.912998	0.91026	1.1043	0.939908	1.00172	0.971713	0.877691	0.844128			129.2	0.0381	0.0482	0.0372	0.135	0.0841	0.0618	0.1538	0.1172	0.1553	0.1399	0.1128	0.141			129.2	0.0354	0.0209	0.0137	0.0679
564.8	1.18995	1.16024	1.29574	0.927021	0.922701	0.922186	1.22499	1.0809	1.3175	0.90139	0.75342	0.881983			564.8	1.25348	1.03847	1.09478	0.908567	0.91124	0.908496	1.10527	0.940198	1.00278	0.969291	0.876058	0.842206			129.6	0.0379	0.0483	0.0367	0.1336	0.0851	0.0615	0.1524	0.1175	0.155	0.1387	0.1128	0.142			129.6	0.0341	0.0215	0.0126	0.0679
565	1.18594	1.15678	1.2919	0.924646	0.920499	0.919697	1.22767	1.08305	1.32083	0.898815	0.751616	0.879095			565	1.24961	1.03522	1.09144	0.906415	0.908993	0.90621	1.10628	0.94096	1.00398	0.966409	0.873571	0.839827			130	0.0387	0.0484	0.0364	0.1345	0.0855	0.0612	0.1533	0.1173	0.1551	0.1397	0.1129	0.1405			130	0.0347	0.022	0.0139	0.0678
565.2	1.18279	1.15378	1.28859	0.922912	0.918618	0.91797	1.23009	1.08496	1.32381	0.896768	0.749943	0.876699			565.2	1.24678	1.0326	1.08887	0.904373	0.906767	0.904526	1.10695	0.941724	1.00519	0.964276	0.871552	0.83768			130.4	0.0384	0.0493	0.0368	0.1341	0.0848	0.0623	0.1529	0.1164	0.1551	0.1398	0.1127	0.1414			130.4	0.0356	0.0216	0.0132	0.0682
565.4	1.17875	1.15033	1.28444	0.920587	0.916337	0.915802	1.23329	1.08734	1.3278	0.8942	0.747954	0.873807			565.4	1.24319	1.02953	1.08566	0.901711	0.903971	0.902142	1.10819	0.942717	1.00696	0.961433	0.869155	0.83498			130.8	0.0394	0.05	0.0356	0.1348	0.0854	0.0612	0.1536	0.1176	0.1556	0.1405	0.1131	0.1423			130.8	0.0351	0.0217	0.0134	0.068
565.6	1.17407	1.14592	1.27936	0.917771	0.913524	0.912908	1.2371	1.09045	1.33308	0.891181	0.745058	0.870306			565.6	1.23866	1.02601	1.08147	0.898689	0.901123	0.899229	1.11017	0.94374	1.00869	0.957699	0.866712	0.83157			131.2	0.0389	0.0489	0.0378	0.1347	0.086	0.0622	0.1535	0.1164	0.1545	0.1402	0.1133	0.1406			131.2	0.0352	0.0219	0.0142	0.0683
565.8	1.1708	1.14307	1.27605	0.915851	0.911561	0.911032	1.23998	1.09244	1.33675	0.889208	0.743641	0.867891			565.8	1.23565	1.02344	1.07883	0.896602	0.899296	0.897187	1.11138	0.944421	1.01011	0.955555	0.864832	0.829202			131.6	0.0387	0.0493	0.0374	0.1349	0.0865	0.0614	0.1537	0.118	0.1553	0.1402	0.1139	0.1415			131.6	0.0355	0.0209	0.0136	0.0676
566	1.16676	1.13947	1.2719	0.913233	0.909139	0.90866	1.24373	1.09516	1.3414	0.88702	0.741941	0.865219			566	1.23198	1.02027	1.07551	0.894162	0.896942	0.894666	1.11297	0.945435	1.01218	0.953031	0.8625	0.826345			132	0.0385	0.0488	0.0369	0.1346	0.0869	0.0619	0.1534	0.1171	0.1563	0.1397	0.114	0.1416			132	0.0355	0.0221	0.0134	0.0683
566.2	1.16346	1.13628	1.2686	0.911121	0.90732	0.906754	1.24682	1.09759	1.34553	0.884902	0.740415	0.862717			566.2	1.2287	1.01776	1.07298	0.892398	0.895087	0.892818	1.11442	0.946165	1.01399	0.950622	0.860376	0.824172			132.4	0.039	0.0492	0.0377	0.1349	0.0866	0.0622	0.1537	0.1177	0.1552	0.1408	0.1125	0.1413			132.4	0.0362	0.022	0.0135	0.0688
566.4	1.15931	1.13223	1.26438	0.908708	0.904958	0.904279	1.25086	1.10074	1.35094	0.882216	0.73849	0.859437			566.4	1.22476	1.01434	1.06986	0.890146	0.8927	0.890204	1.11655	0.947349	1.01647	0.947641	0.858041	0.82114			132.8	0.0402	0.0492	0.0372	0.1334	0.0859	0.0635	0.1522	0.1175	0.156	0.1401	0.1125	0.1415			132.8	0.0346	0.0228	0.0133	0.0682
566.6	1.15596	1.12924	1.26094	0.906844	0.903137	0.902367	1.25404	1.10305	1.35541	0.880266	0.737068	0.85677			566.6	1.22157	1.01185	1.06715	0.888225	0.89063	0.888067	1.11835	0.948484	1.01848	0.945117	0.856312	0.818712			133.2	0.04	0.0501	0.0373	0.135	0.0863	0.0625	0.1538	0.1175	0.1554	0.1402	0.1128	0.1411			133.2	0.0361	0.022	0.0142	0.0679
566.8	1.15178	1.12539	1.25665	0.904516	0.900702	0.899961	1.25825	1.10633	1.3611	0.877537	0.735147	0.853587			566.8	1.21738	1.00875	1.06372	0.885633	0.887923	0.885521	1.12043	0.950057	1.02106	0.942014	0.853915	0.815446			133.6	0.04	0.0497	0.0375	0.135	0.087	0.063	0.1538	0.1168	0.1565	0.1405	0.1129	0.1416			133.6	0.0353	0.0223	0.0136	0.069
567	1.14843	1.12232	1.25322	0.902475	0.898606	0.89808	1.26184	1.10937	1.36594	0.875331	0.733704	0.851307			567	1.21431	1.00628	1.06071	0.883555	0.88591	0.883494	1.12242	0.951329	1.02354	0.939667	0.851819	0.813025			134	0.0389	0.05	0.038	0.1341	0.0876	0.0626	0.1529	0.1167	0.1557	0.1402	0.114	0.1415			134	0.0357	0.0217	0.0147	0.0686
567.2	1.14423	1.11833	1.24891	0.900167	0.896041	0.895718	1.26624	1.11329	1.3721	0.872625	0.731849	0.848621			567.2	1.21059	1.00323	1.05739	0.880811	0.883261	0.880921	1.12491	0.953031	1.02623	0.936759	0.84938	0.810443			134.4	0.0393	0.0501	0.0382	0.1349	0.0874	0.0634	0.1537	0.1172	0.1575	0.1391	0.1128	0.1427			134.4	0.0355	0.022	0.0138	0.0683
567.4	1.13894	1.11337	1.24349	0.897305	0.893049	0.893031	1.27273	1.1185	1.37963	0.86963	0.728961	0.844692			567.4	1.20584	0.999205	1.05331	0.877855	0.880066	0.877618	1.12789	0.955543	1.02959	0.933168	0.846479	0.807001			134.8	0.0401	0.0494	0.0375	0.1351	0.0879	0.0637	0.1539	0.1169	0.1576	0.1403	0.1116	0.1414			134.8	0.0362	0.0225	0.0139	0.0695
567.6	1.13554	1.11008	1.23997	0.895263	0.891017	0.891169	1.27702	1.12211	1.3848	0.867529	0.727629	0.842236			567.6	1.20275	0.996663	1.05041	0.875712	0.877904	0.875523	1.1301	0.957489	1.03207	0.931177	0.844357	0.804675			135.2	0.0406	0.0506	0.0378	0.1354	0.0872	0.0651	0.1542	0.1172	0.1567	0.1401	0.1132	0.1407			135.2	0.0361	0.0234	0.0139	0.0684
567.8	1.13126	1.10625	1.2356	0.892632	0.888526	0.888822	1.28234	1.12655	1.39134	0.864523	0.725809	0.839105			567.8	1.19883	0.993387	1.04692	0.873079	0.875016	0.872832	1.13283	0.959959	1.03525	0.928345	0.841814	0.801673			135.6	0.0399	0.0506	0.038	0.1348	0.0875	0.0641	0.1536	0.1168	0.1575	0.1398	0.113	0.1409			135.6	0.0359	0.0225	0.0133	0.0693
568	1.12812	1.10329	1.23206	0.89073	0.886292	0.886955	1.28645	1.13058	1.39745	0.862149	0.724086	0.836431			568	1.19548	0.990801	1.04422	0.870984	0.872927	0.870777	1.13533	0.961697	1.03798	0.926054	0.839596	0.799171			136	0.0398	0.0508	0.0388	0.1345	0.0874	0.064	0.1533	0.1173	0.1576	0.1398	0.113	0.1412			136	0.0365	0.0229	0.0142	0.0694
568.2	1.12395	1.09949	1.22771	0.888213	0.883796	0.884636	1.29184	1.13567	1.40485	0.859416	0.721805	0.833104			568.2	1.19144	0.987601	1.04059	0.868171	0.870356	0.868251	1.1381	0.964123	1.04147	0.923278	0.837062	0.796223			136.4	0.0404	0.0503	0.0374	0.1355	0.0882	0.0638	0.1543	0.1167	0.1578	0.1401	0.114	0.1409			136.4	0.0358	0.0232	0.0141	0.0692
568.4	1.12049	1.09619	1.22403	0.8864	0.881805	0.882517	1.29679	1.13941	1.41127	0.857423	0.720089	0.830641			568.4	1.18815	0.984838	1.03778	0.866074	0.868439	0.866061	1.14098	0.966061	1.04458	0.920927	0.835326	0.793623			136.8	0.0397	0.0505	0.0389	0.1343	0.0892	0.0644	0.1531	0.1175	0.1573	0.1401	0.112	0.1419			136.8	0.0361	0.0237	0.0134	0.0699
568.6	1.11618	1.09247	1.21949	0.884026	0.879263	0.88	1.30302	1.14426	1.41952	0.854936	0.718232	0.827507			568.6	1.18406	0.981501	1.03418	0.863753	0.866156	0.863236	1.14476	0.968698	1.04846	0.917899	0.832884	0.790582			137.2	0.0405	0.0504	0.0377	0.1352	0.0887	0.0652	0.154	0.1174	0.1578	0.1407	0.1133	0.1411			137.2	0.0358	0.0236	0.0143	0.0698
568.8	1.11258	1.08922	1.21593	0.881963	0.877044	0.877916	1.30826	1.14857	1.42613	0.852944	0.716684	0.824895			568.8	1.1808	0.978959	1.03155	0.861441	0.864084	0.861094	1.14788	0.970856	1.05166	0.91575	0.830722	0.788198			137.6	0.0403	0.0514	0.0392	0.1341	0.0881	0.0648	0.1529	0.1183	0.1576	0.1399	0.1125	0.1412			137.6	0.0358	0.0231	0.0137	0.0693
569	1.10812	1.08525	1.2116	0.879471	0.874424	0.875351	1.3149	1.1541	1.43464	0.850386	0.714648	0.821771			569	1.17668	0.975607	1.02825	0.858666	0.861326	0.858491	1.15145	0.973673	1.05577	0.913341	0.828061	0.785201			138	0.041	0.0514	0.0388	0.1357	0.0893	0.0655	0.1545	0.1172	0.1577	0.1403	0.1139	0.1408			138	0.0362	0.0227	0.0137	0.07
569.2	1.10291	1.0803	1.20612	0.876349	0.871316	0.87205	1.32297	1.16124	1.44499	0.847166	0.712231	0.817433			569.2	1.17147	0.971428	1.02365	0.855595	0.858055	0.855387	1.15586	0.977134	1.06125	0.9097	0.825536	0.781394			138.4	0.0407	0.0513	0.0399	0.1354	0.0887	0.0656	0.1542	0.1179	0.158	0.1393	0.1134	0.1414			138.4	0.0366	0.0231	0.0139	0.07
569.4	1.09942	1.07728	1.2025	0.874562	0.869208	0.869859	1.32873	1.16591	1.45223	0.844844	0.710543	0.814533			569.4	1.16821	0.968733	1.02097	0.853325	0.855888	0.853155	1.15908	0.979709	1.0647	0.907334	0.823778	0.778731			138.8	0.0415	0.0524	0.0395	0.1352	0.0893	0.065	0.154	0.1176	0.1583	0.1406	0.1135	0.143			138.8	0.0366	0.023	0.0147	0.0695
569.6	1.09506	1.0733	1.19795	0.872229	0.866714	0.867153	1.33619	1.17176	1.46161	0.842207	0.708663	0.810956			569.6	1.16418	0.96532	1.0175	0.850365	0.853364	0.850525	1.16328	0.983168	1.06917	0.904433	0.821575	0.775319			139.2	0.0403	0.0516	0.0387	0.1344	0.0899	0.0661	0.1532	0.118	0.1581	0.1401	0.113	0.1403			139.2	0.0359	0.0228	0.0144	0.0703
569.8	1.09187	1.07006	1.19453	0.870244	0.864503	0.865091	1.34238	1.17721	1.46933	0.840015	0.706957	0.808535			569.8	1.16075	0.962839	1.01461	0.848052	0.851222	0.848498	1.16671	0.986032	1.07276	0.902321	0.819494	0.773093			139.6	0.0416	0.0516	0.0389	0.1359	0.0896	0.0663	0.1547	0.1177	0.158	0.1396	0.1127	0.1409			139.6	0.0365	0.0226	0.0143	0.0698
570	1.08774	1.06579	1.19019	0.867718	0.861799	0.862398	1.35035	1.18436	1.47899	0.837171	0.704853	0.805426			570	1.15664	0.959425	1.011	0.845128	0.848477	0.845742	1.171	0.989585	1.0774	0.899504	0.817172	0.770488			140	0.0407	0.0526	0.039	0.1347	0.0898	0.0669	0.1535	0.1175	0.1592	0.1404	0.1123	0.1403			140	0.0368	0.0235	0.0142	0.0706
570.2	1.08436	1.06268	1.18651	0.865736	0.859993	0.860237	1.35679	1.18982	1.48729	0.835192	0.703408	0.802704			570.2	1.15351	0.956447	1.00811	0.842906	0.846388	0.843461	1.1746	0.992655	1.08136	0.897369	0.815688	0.768325			140.4	0.0413	0.053	0.0399	0.1351	0.0895	0.0654	0.1539	0.118	0.1592	0.1409	0.1131	0.1409			140.4	0.037	0.023	0.0148	0.0702
570.4	1.08004	1.05847	1.18159	0.863103	0.857547	0.857501	1.36491	1.1969	1.49772	0.832558	0.701435	0.799254			570.4	1.1496	0.953044	1.00437	0.840288	0.843846	0.840733	1.17942	0.996472	1.08647	0.894614	0.813741	0.765465			140.8	0.0414	0.0523	0.0394	0.1357	0.0904	0.0661	0.1545	0.1173	0.1598	0.1401	0.1131	0.1415			140.8	0.0372	0.0235	0.0147	0.0703
570.6	1.07653	1.05543	1.17802	0.860899	0.855385	0.855319	1.37182	1.20235	1.50628	0.830553	0.700077	0.796325			570.6	1.14623	0.950355	1.00134	0.838138	0.841703	0.838715	1.18334	0.999742	1.09093	0.892526	0.811909	0.762709			141.2	0.0414	0.0528	0.0396	0.136	0.09	0.0666	0.1548	0.118	0.16	0.1401	0.1144	0.1424			141.2	0.0374	0.0228	0.0146	0.0708
570.8	1.07213	1.05162	1.17366	0.858269	0.852691	0.852786	1.38057	1.20941	1.51715	0.827859	0.698557	0.792759			570.8	1.14213	0.946857	0.997556	0.83534	0.839291	0.836171	1.18861	1.0039	1.09665	0.889804	0.809957	0.759376			141.6	0.042	0.0523	0.039	0.1354	0.0907	0.0669	0.1542	0.1174	0.1592	0.1403	0.1133	0.1415			141.6	0.0361	0.0239	0.0149	0.071
571	1.06676	1.04685	1.16817	0.855092	0.8495	0.849318	1.39136	1.21829	1.53018	0.824949	0.696077	0.788709			571	1.13697	0.942589	0.993248	0.831988	0.835971	0.832754	1.19458	1.00891	1.10314	0.886892	0.80747	0.756226			142	0.0416	0.0536	0.0395	0.1355	0.0903	0.0667	0.1543	0.1182	0.159	0.1398	0.1136	0.1419			142	0.0369	0.0233	0.0154	0.0711
571.2	1.06427	1.04442	1.16539	0.853517	0.847799	0.847553	1.39716	1.22286	1.53693	0.823556	0.69485	0.786764			571.2	1.13443	0.940657	0.991142	0.830205	0.834592	0.831255	1.19814	1.0116	1.1064	0.88518	0.806191	0.754552			142.4	0.0422	0.0529	0.0398	0.1349	0.0914	0.0666	0.1537	0.1172	0.1601	0.1406	0.1125	0.1413			142.4	0.0374	0.0236	0.015	0.0706
571.4	1.05982	1.04021	1.16086	0.850795	0.844903	0.844688	1.40688	1.23071	1.54823	0.821389	0.693042	0.783899			571.4	1.13049	0.93714	0.9878	0.8275	0.831751	0.828562	1.20387	1.01616	1.11212	0.882684	0.804449	0.751741			142.8	0.0417	0.0535	0.0408	0.1357	0.0917	0.0669	0.1545	0.118	0.1601	0.1405	0.1136	0.1412			142.8	0.0376	0.024	0.0151	0.0708
571.6	1.05623	1.03694	1.15709	0.84854	0.842595	0.842448	1.4147	1.23711	1.55771	0.819456	0.691713	0.781351			571.6	1.127	0.934291	0.984962	0.825366	0.829483	0.826158	1.20879	1.01991	1.11693	0.880736	0.803181	0.749176			143.2	0.0435	0.0541	0.0409	0.135	0.0907	0.0674	0.1538	0.1175	0.1599	0.1392	0.114	0.1408			143.2	0.0373	0.0242	0.0141	0.0717
571.8	1.05082	1.03221	1.15156	0.845202	0.839316	0.839409	1.42607	1.24733	1.57162	0.816408	0.689777	0.777462			571.8	1.12181	0.930515	0.980563	0.822196	0.825994	0.822759	1.21588	1.02587	1.12397	0.877865	0.800505	0.745322			143.6	0.0426	0.0535	0.0403	0.137	0.0923	0.0676	0.1558	0.118	0.1603	0.1396	0.1138	0.1406			143.6	0.0369	0.0229	0.0156	0.072
572	1.04632	1.0279	1.14683	0.842529	0.836598	0.836544	1.43612	1.25596	1.58377	0.813847	0.687781	0.774053			572	1.11765	0.92701	0.977138	0.819464	0.823215	0.819846	1.22175	1.03079	1.13024	0.875372	0.798424	0.742061			144	0.0428	0.0533	0.0404	0.1353	0.0921	0.0679	0.1541	0.1168	0.1599	0.1399	0.1135	0.1424			144	0.037	0.0244	0.0153	0.0716
572.2	1.04293	1.02473	1.14326	0.840237	0.834342	0.834351	1.44397	1.2629	1.59366	0.811745	0.686545	0.771275			572.2	1.11421	0.924175	0.97424	0.817494	0.821135	0.817601	1.22654	1.03488	1.13555	0.873321	0.796976	0.739809			144.4	0.0424	0.053	0.0395	0.1355	0.0913	0.0678	0.1543	0.1179	0.1608	0.1398	0.1134	0.1424			144.4	0.036	0.0236	0.0149	0.0713
572.4	1.03849	1.02064	1.13868	0.837393	0.831476	0.831538	1.45469	1.27168	1.60684	0.80947	0.684983	0.768133			572.4	1.11006	0.920631	0.970703	0.81452	0.818387	0.814743	1.23321	1.04032	1.14213	0.870976	0.795043	0.737316			144.8	0.0428	0.0538	0.0406	0.1347	0.0919	0.0679	0.1535	0.1182	0.1606	0.1384	0.1136	0.1421			144.8	0.0377	0.0238	0.0146	0.072
572.6	1.03486	1.01737	1.13508	0.835295	0.829387	0.829378	1.46337	1.27888	1.61757	0.807716	0.68377	0.765988			572.6	1.10683	0.917943	0.967921	0.812186	0.816176	0.812514	1.23864	1.0446	1.14749	0.869257	0.793491	0.735199			145.2	0.0424	0.0539	0.0409	0.1355	0.0928	0.0689	0.1543	0.1173	0.1595	0.141	0.1129	0.1412			145.2	0.0376	0.024	0.0153	0.0723
572.8	1.03028	1.01322	1.13056	0.832665	0.826724	0.826701	1.47424	1.28815	1.63097	0.805474	0.68201	0.762973			572.8	1.10266	0.91445	0.964118	0.809488	0.813468	0.809662	1.2455	1.04989	1.15457	0.867173	0.791427	0.732193			145.6	0.0434	0.0551	0.0403	0.1365	0.0926	0.0679	0.1553	0.1179	0.1606	0.14	0.115	0.1422			145.6	0.0382	0.024	0.0151	0.0716
573	1.0268	1.00986	1.12696	0.830475	0.82457	0.824538	1.48307	1.2957	1.64171	0.803821	0.680767	0.760436			573	1.09928	0.911625	0.961182	0.807382	0.81125	0.807303	1.25112	1.05442	1.16021	0.865413	0.790043	0.729855			146	0.0437	0.0546	0.0408	0.1355	0.0924	0.0686	0.1543	0.118	0.1603	0.14	0.1134	0.141			146	0.0373	0.024	0.0154	0.0728
573.2	1.02231	1.00605	1.1222	0.827605	0.8218	0.82194	1.49456	1.30521	1.65528	0.801645	0.679297	0.757308			573.2	1.09517	0.908014	0.95737	0.804584	0.808219	0.804319	1.25806	1.06006	1.16742	0.862842	0.78813	0.726526			146.4	0.0437	0.0552	0.0397	0.1352	0.0927	0.0687	0.154	0.1181	0.1609	0.1399	0.1135	0.1421			146.4	0.0376	0.0249	0.0139	0.0721
573.4	1.01885	1.00295	1.11851	0.825365	0.819561	0.819835	1.50375	1.31255	1.66638	0.800043	0.678004	0.7548			573.4	1.09179	0.905347	0.954211	0.802343	0.805981	0.802007	1.26381	1.06436	1.17314	0.860739	0.786493	0.72398			146.8	0.0436	0.054	0.042	0.1357	0.0929	0.0695	0.1545	0.1176	0.1595	0.1389	0.1134	0.1428			146.8	0.0378	0.0236	0.0149	0.0714
573.6	1.01347	0.99809	1.11327	0.821922	0.816045	0.816715	1.51759	1.32365	1.68326	0.797532	0.675748	0.750524			573.6	1.08644	0.901211	0.949925	0.799032	0.802543	0.798621	1.27296	1.07109	1.18218	0.858314	0.784383	0.720071			147.2	0.0434	0.0554	0.0413	0.1356	0.093	0.068	0.1544	0.1175	0.1608	0.1398	0.1137	0.1412			147.2	0.0384	0.0242	0.0152	0.0719
573.8	1.00919	0.994038	1.10895	0.819241	0.812965	0.813984	1.52978	1.33341	1.69775	0.795448	0.674175	0.747174			573.8	1.08223	0.897749	0.946579	0.796204	0.799719	0.795808	1.28029	1.07703	1.18966	0.856004	0.782354	0.716705			147.6	0.0442	0.0547	0.0418	0.1347	0.0926	0.0693	0.1535	0.1171	0.1606	0.1401	0.1138	0.1418			147.6	0.0384	0.0248	0.0151	0.0715
574	1.00571	0.990497	1.1054	0.8169	0.810682	0.811667	1.53937	1.34164	1.70937	0.793638	0.672996	0.744873			574	1.0788	0.89498	0.943656	0.793883	0.797467	0.793489	1.28636	1.08197	1.19571	0.854005	0.780832	0.714383			148	0.0442	0.0551	0.041	0.1358	0.0933	0.0693	0.1546	0.1178	0.1607	0.1394	0.1147	0.1406			148	0.0386	0.0237	0.0146	0.0722
574.2	1.00157	0.986329	1.10081	0.814164	0.807879	0.808638	1.55141	1.35208	1.72435	0.791324	0.671367	0.741459			574.2	1.07462	0.89144	0.939953	0.791084	0.794504	0.790566	1.29429	1.08775	1.2035	0.851466	0.778974	0.71167			148.4	0.0445	0.0554	0.0413	0.1371	0.0936	0.0706	0.1559	0.1175	0.1609	0.1403	0.1137	0.1419			148.4	0.0384	0.024	0.0159	0.0726
574.4	0.998163	0.983045	1.09716	0.811893	0.805659	0.806383	1.56131	1.36045	1.73625	0.789401	0.670338	0.738604			574.4	1.07117	0.888535	0.937052	0.788811	0.792235	0.788317	1.30109	1.09246	1.20975	0.849186	0.777526	0.709299			148.8	0.0446	0.0549	0.0414	0.1363	0.094	0.0708	0.1551	0.1173	0.1616	0.1398	0.1137	0.1413			148.8	0.0386	0.0248	0.0148	0.0726
574.6	0.993616	0.978936	1.09257	0.809108	0.802772	0.803541	1.57413	1.37095	1.75142	0.78716	0.668959	0.734965			574.6	1.0668	0.884959	0.933163	0.785984	0.789362	0.78557	1.30884	1.09863	1.21786	0.847072	0.775636	0.706101			149.2	0.0437	0.0555	0.0419	0.1357	0.0945	0.0708	0.1545	0.1183	0.1602	0.1399	0.1132	0.1415			149.2	0.0377	0.025	0.0151	0.0723
574.8	0.989973	0.975771	1.08893	0.80682	0.800494	0.801206	1.58444	1.37946	1.76407	0.785455	0.667748	0.731758			574.8	1.06326	0.882134	0.93005	0.783607	0.787064	0.783381	1.3153	1.10358	1.22444	0.845407	0.773821	0.703461			149.6	0.044	0.0553	0.042	0.1357	0.0933	0.0697	0.1545	0.1175	0.1613	0.1403	0.1149	0.1413			149.6	0.0387	0.0246	0.0155	0.072
575	0.984811	0.970657	1.08357	0.803618	0.796973	0.797751	1.60021	1.39256	1.78346	0.782774	0.665753	0.727375			575	1.05853	0.877657	0.925584	0.7803	0.783678	0.780114	1.32475	1.1115	1.23475	0.842741	0.771896	0.699826			150	0.0441	0.0567	0.0411	0.1355	0.0941	0.069	0.1543	0.1172	0.1611	0.1404	0.1137	0.1418			150	0.0387	0.0249	0.0147	0.0724
575.2	0.980538	0.966348	1.07906	0.800793	0.793983	0.7949	1.61368	1.40395	1.80001	0.780358	0.66381	0.723958			575.2	1.05426	0.874019	0.921797	0.777457	0.780802	0.777346	1.33314	1.11838	1.24359	0.840366	0.770027	0.697054			150.4	0.0448	0.0557	0.0421	0.1355	0.0945	0.0706	0.1543	0.1171	0.1618	0.1402	0.1137	0.1409			150.4	0.0381	0.0251	0.0155	0.0734
575.4	0.977199	0.962837	1.0755	0.79853	0.791591	0.792732	1.62418	1.41314	1.81336	0.778429	0.662513	0.721249			575.4	1.05065	0.871235	0.918691	0.775099	0.778492	0.77528	1.34002	1.12418	1.25054	0.838416	0.768437	0.695023			150.8	0.0451	0.0556	0.0423	0.1356	0.0944	0.0705	0.1544	0.1173	0.1608	0.1399	0.1135	0.1411			150.8	0.0384	0.0244	0.0145	0.0725
575.6	0.973006	0.958668	1.07061	0.795894	0.788778	0.789684	1.63809	1.42453	1.82974	0.776341	0.660988	0.718235			575.6	1.04662	0.867772	0.91489	0.772124	0.775401	0.772366	1.34871	1.13111	1.25916	0.836231	0.7665	0.691894			151.2	0.0446	0.0567	0.0423	0.1365	0.0938	0.0708	0.1553	0.1162	0.1618	0.1401	0.1131	0.1407			151.2	0.0386	0.0246	0.0155	0.0736
575.8	0.969742	0.955458	1.06691	0.79372	0.786454	0.787235	1.64899	1.43353	1.84272	0.774512	0.659802	0.715229			575.8	1.04316	0.865052	0.91185	0.769899	0.773102	0.770067	1.35579	1.13651	1.26619	0.834348	0.765249	0.68909			151.6	0.0444	0.0558	0.0423	0.1368	0.0939	0.0714	0.1556	0.1179	0.1619	0.1407	0.1127	0.1422			151.6	0.0385	0.0253	0.0158	0.0734
576	0.965474	0.951271	1.06234	0.790775	0.783417	0.784447	1.66288	1.44529	1.85925	0.772189	0.658132	0.711329			576	1.03892	0.861454	0.908219	0.767	0.770198	0.767155	1.36488	1.14388	1.27483	0.831467	0.7635	0.685735			152	0.0451	0.0568	0.0423	0.1351	0.0934	0.0711	0.1539	0.1175	0.1611	0.1404	0.1133	0.1413			152	0.0392	0.026	0.0155	0.0732
576.2	0.962027	0.948082	1.05866	0.78838	0.780985	0.782193	1.67406	1.45516	1.87261	0.770559	0.656984	0.708317			576.2	1.03522	0.858679	0.905181	0.764619	0.76784	0.764998	1.37199	1.14999	1.28176	0.829297	0.762314	0.683175			152.4	0.0446	0.0571	0.0419	0.136	0.0948	0.0708	0.1548	0.1169	0.1622	0.1401	0.1133	0.1422			152.4	0.039	0.0256	0.016	0.0727
576.4	0.957635	0.943809	1.05409	0.785613	0.778232	0.779084	1.68789	1.46677	1.88946	0.768455	0.655703	0.704667			576.4	1.03092	0.855201	0.901388	0.761619	0.764878	0.762187	1.38085	1.15734	1.29129	0.827744	0.7606	0.679899			152.8	0.0452	0.0561	0.0421	0.1359	0.0947	0.0719	0.1547	0.1178	0.1624	0.1403	0.1136	0.1414			152.8	0.0394	0.0253	0.0161	0.0738
576.6	0.954135	0.940303	1.05029	0.783445	0.776028	0.776541	1.699	1.47635	1.90302	0.76669	0.654816	0.701545			576.6	1.02749	0.852412	0.898342	0.759233	0.762653	0.759977	1.38807	1.16364	1.29859	0.826342	0.759351	0.677687			153.2	0.0454	0.0569	0.0428	0.1359	0.0952	0.0719	0.1547	0.1177	0.1628	0.1399	0.1137	0.1413			153.2	0.0383	0.0244	0.0152	0.0741
576.8	0.949147	0.935543	1.0447	0.780037	0.772349	0.773029	1.7164	1.49145	1.92419	0.76394	0.652846	0.697079			576.8	1.02236	0.847713	0.894089	0.755933	0.759399	0.756547	1.39914	1.17319	1.31014	0.823529	0.756731	0.673894			153.6	0.0456	0.0574	0.0419	0.1369	0.0954	0.0718	0.1557	0.1174	0.1622	0.1394	0.1146	0.1413			153.6	0.0391	0.0259	0.0162	0.0737
577	0.944777	0.931418	1.03988	0.777164	0.769534	0.770075	1.73074	1.50481	1.94144	0.761544	0.651226	0.693476			577	1.01809	0.844142	0.890437	0.752889	0.75635	0.75348	1.40862	1.18123	1.31915	0.820872	0.754461	0.671006			154	0.0453	0.0565	0.0422	0.1358	0.0952	0.0721	0.1546	0.1176	0.1629	0.1404	0.1132	0.1418			154	0.0385	0.0253	0.0163	0.0748
577.2	0.9414	0.928242	1.03602	0.774838	0.767212	0.767527	1.74181	1.51526	1.95538	0.75962	0.64985	0.690573			577.2	1.0145	0.841153	0.887434	0.750601	0.754008	0.751124	1.41617	1.1874	1.32642	0.81881	0.753107	0.668483			154.4	0.0458	0.0567	0.0429	0.1352	0.0949	0.0723	0.154	0.1182	0.1632	0.1399	0.1137	0.1411			154.4	0.0391	0.026	0.0155	0.0745
577.4	0.936863	0.924182	1.0312	0.771944	0.764231	0.764635	1.75621	1.52746	1.97279	0.757812	0.648025	0.68693			577.4	1.0101	0.837609	0.883751	0.747735	0.750988	0.748168	1.4257	1.19483	1.33597	0.816825	0.751249	0.66537			154.8	0.0448	0.0568	0.0427	0.1362	0.0962	0.0724	0.155	0.1175	0.1619	0.1403	0.1142	0.1422			154.8	0.0391	0.0261	0.0162	0.0738
577.6	0.933359	0.920894	1.02747	0.769515	0.761801	0.762393	1.768	1.53714	1.98692	0.756531	0.647018	0.684122			577.6	1.00648	0.834766	0.880769	0.745324	0.748697	0.745891	1.43333	1.20089	1.34389	0.81546	0.749687	0.662663			155.2	0.0454	0.058	0.0432	0.1361	0.0955	0.0726	0.1549	0.118	0.1605	0.1408	0.1141	0.142			155.2	0.0402	0.0261	0.0159	0.074
577.8	0.929205	0.916839	1.02281	0.766754	0.758869	0.759559	1.78233	1.54997	2.00486	0.754498	0.645492	0.680624			577.8	1.00235	0.831275	0.877234	0.742502	0.745548	0.742806	1.44222	1.20855	1.35375	0.81327	0.748271	0.659051			155.6	0.0462	0.0581	0.043	0.1362	0.0958	0.0734	0.155	0.1166	0.162	0.1399	0.1133	0.1409			155.6	0.0405	0.0259	0.0161	0.0744
578	0.925866	0.913386	1.01895	0.764413	0.756585	0.757387	1.79384	1.56064	2.01886	0.752694	0.644399	0.677873			578	0.999148	0.828403	0.874354	0.740185	0.743114	0.740128	1.44939	1.21487	1.36162	0.811638	0.74675	0.6564			156	0.0461	0.0574	0.0429	0.1361	0.0959	0.0725	0.1549	0.1178	0.1623	0.1404	0.1126	0.1419			156	0.0403	0.0262	0.0162	0.075
578.2	0.920733	0.908467	1.01353	0.760783	0.75306	0.75394	1.81129	1.5759	2.0398	0.75029	0.642479	0.67388			578.2	0.993966	0.824025	0.869774	0.736408	0.739601	0.736505	1.4607	1.22405	1.37333	0.809023	0.744609	0.652888			156.4	0.0462	0.0577	0.043	0.137	0.0959	0.0734	0.1558	0.1182	0.1625	0.1396	0.1145	0.1417			156.4	0.0405	0.0257	0.0165	0.0742
578.4	0.916433	0.904366	1.00899	0.757679	0.750295	0.751014	1.82565	1.58832	2.05716	0.748289	0.641212	0.670646			578.4	0.989661	0.820474	0.865951	0.733229	0.736729	0.73344	1.47012	1.23166	1.38282	0.806832	0.743023	0.649856			156.8	0.0462	0.0583	0.0436	0.1367	0.0973	0.0727	0.1555	0.1183	0.1623	0.1398	0.1142	0.1425			156.8	0.0407	0.0264	0.016	0.0743
578.6	0.912996	0.901121	1.00529	0.755251	0.748132	0.748568	1.83706	1.59784	2.07083	0.746714	0.640531	0.668065			578.6	0.986345	0.81764	0.862786	0.73072	0.734352	0.731011	1.4775	1.2374	1.3904	0.805398	0.741976	0.647233			157.2	0.0461	0.058	0.0439	0.1355	0.0963	0.0731	0.1543	0.1183	0.1625	0.14	0.1135	0.1415			157.2	0.0397	0.0263	0.0161	0.0748
578.8	0.908731	0.897153	1.0009	0.752365	0.745243	0.745569	1.85224	1.60988	2.08895	0.745115	0.63978	0.664796			578.8	0.982306	0.814093	0.858989	0.727796	0.731456	0.728001	1.48735	1.24455	1.4004	0.803633	0.740845	0.644016			157.6	0.0464	0.0594	0.0429	0.1364	0.0968	0.073	0.1552	0.1175	0.1624	0.1407	0.1135	0.142			157.6	0.0404	0.0264	0.0156	0.0741
579	0.905211	0.893747	0.997453	0.74997	0.742872	0.743347	1.86405	1.61984	2.10349	0.743705	0.638645	0.661815			579	0.978901	0.811204	0.855973	0.725478	0.729123	0.725673	1.49498	1.25057	1.4081	0.802354	0.739367	0.641674			158	0.0473	0.0588	0.0433	0.1361	0.0966	0.0737	0.1549	0.1172	0.1625	0.1402	0.114	0.1416			158	0.0401	0.025	0.0156	0.0752
579.2	0.900937	0.88952	0.99263	0.746929	0.739996	0.740418	1.87788	1.63275	2.12178	0.741511	0.637554	0.658394			579.2	0.974489	0.807521	0.852476	0.722688	0.726206	0.722632	1.50415	1.25849	1.41784	0.800378	0.737807	0.638918			158.4	0.0467	0.0581	0.0436	0.1367	0.0969	0.0739	0.1555	0.1172	0.1638	0.1411	0.1135	0.1404			158.4	0.0399	0.0273	0.0163	0.0748
579.4	0.897666	0.886207	0.988868	0.744531	0.737697	0.73804	1.88926	1.64323	2.13605	0.739895	0.636529	0.655624			579.4	0.971053	0.804566	0.849566	0.720355	0.723919	0.720401	1.51171	1.26494	1.42573	0.798978	0.736084	0.636214			158.8	0.0471	0.0588	0.0441	0.1363	0.0972	0.0739	0.1551	0.1175	0.1633	0.141	0.1128	0.1408			158.8	0.0399	0.0263	0.0162	0.0753
579.6	0.893468	0.882239	0.984282	0.741841	0.734788	0.734962	1.9032	1.65597	2.15356	0.737841	0.635257	0.65222			579.6	0.966821	0.801117	0.845534	0.717372	0.720851	0.717344	1.52078	1.27238	1.43491	0.796819	0.73422	0.633449			159.2	0.0471	0.0586	0.0433	0.1369	0.0969	0.0734	0.1557	0.1175	0.1638	0.1403	0.1129	0.1421			159.2	0.0404	0.0272	0.016	0.0747
579.8	0.890138	0.879104	0.980691	0.739542	0.732485	0.73266	1.91432	1.66602	2.16773	0.736386	0.63409	0.649268			579.8	0.963298	0.798457	0.842597	0.714828	0.718478	0.714998	1.52821	1.27839	1.44257	0.795096	0.73293	0.630749			159.6	0.0473	0.058	0.043	0.1357	0.0967	0.0752	0.1545	0.1184	0.1636	0.1406	0.1137	0.1419			159.6	0.0405	0.0279	0.0154	0.075
580	0.885109	0.874007	0.97541	0.735914	0.72887	0.72915	1.93183	1.68094	2.18841	0.734279	0.632776	0.645694			580	0.958265	0.794429	0.838267	0.71118	0.714684	0.711497	1.53955	1.28693	1.45331	0.7929	0.731726	0.626703			160	0.0477	0.0583	0.0444	0.1367	0.0978	0.0742	0.1555	0.1171	0.1627	0.1407	0.1139	0.1419			160	0.0401	0.0268	0.0167	0.0762
580.2	0.880804	0.869583	0.970982	0.733013	0.725921	0.726097	1.94614	1.69234	2.2051	0.732507	0.631838	0.642735			580.2	0.954104	0.790956	0.834199	0.708145	0.711811	0.708547	1.54858	1.29384	1.46212	0.791058	0.730729	0.623718			160.4	0.0469	0.0593	0.0426	0.1356	0.0983	0.0757	0.1544	0.1177	0.1634	0.1403	0.1144	0.1415			160.4	0.0408	0.0263	0.0161	0.0753
580.4	0.87728	0.866209	0.967416	0.730811	0.723638	0.723772	1.95753	1.70129	2.21865	0.731048	0.631113	0.640416			580.4	0.95069	0.788109	0.831088	0.705834	0.709498	0.70613	1.55567	1.2997	1.46958	0.789742	0.729984	0.621889			160.8	0.0472	0.0598	0.0441	0.1372	0.0987	0.075	0.156	0.1178	0.1632	0.1394	0.1135	0.1412			160.8	0.0404	0.0258	0.0166	0.076
580.6	0.873151	0.862175	0.962968	0.727926	0.720731	0.721004	1.97173	1.71279	2.23571	0.729205	0.630094	0.637159			580.6	0.946585	0.784613	0.82743	0.702877	0.706633	0.703009	1.56443	1.3069	1.47924	0.788284	0.728469	0.619289			161.2	0.0477	0.0598	0.0443	0.1361	0.0978	0.0748	0.1549	0.1186	0.1638	0.1392	0.114	0.1416			161.2	0.0406	0.0268	0.0159	0.0761
580.8	0.869739	0.859053	0.959501	0.725743	0.718353	0.718724	1.98248	1.7223	2.24939	0.727605	0.629013	0.634493			580.8	0.943185	0.781799	0.824404	0.700489	0.704409	0.700643	1.57126	1.31276	1.48638	0.786822	0.727261	0.616608			161.6	0.0466	0.059	0.0449	0.1371	0.0984	0.0746	0.1559	0.1183	0.1632	0.1397	0.1135	0.1418			161.6	0.0397	0.0277	0.0167	0.0757
581	0.865498	0.854997	0.954935	0.722882	0.715169	0.715794	1.99603	1.73385	2.26597	0.725266	0.627778	0.630593			581	0.938871	0.778295	0.820495	0.697473	0.701393	0.697643	1.57982	1.3202	1.49467	0.785025	0.726011	0.613404			162	0.0481	0.0604	0.0449	0.1365	0.0979	0.0751	0.1553	0.117	0.1629	0.1411	0.1145	0.1427			162	0.0402	0.0279	0.0168	0.0757
581.2	0.862142	0.851738	0.951211	0.720471	0.712713	0.71341	2.00727	1.74248	2.27938	0.72356	0.62685	0.627336			581.2	0.935258	0.775513	0.817435	0.695168	0.69916	0.695367	1.58703	1.32585	1.50101	0.783399	0.724953	0.610967			162.4	0.0477	0.059	0.0439	0.1362	0.098	0.0752	0.155	0.1187	0.164	0.1408	0.1142	0.1421			162.4	0.0419	0.0272	0.016	0.0749
581.4	0.857015	0.846786	0.945953	0.717013	0.709233	0.709915	2.02361	1.75628	2.29878	0.721353	0.625651	0.623669			581.4	0.93007	0.77139	0.813158	0.691681	0.695544	0.691693	1.59853	1.33454	1.51119	0.78103	0.723661	0.608116			162.8	0.0479	0.0613	0.0442	0.136	0.0977	0.0757	0.1548	0.1181	0.1645	0.1402	0.1133	0.1421			162.8	0.0405	0.0267	0.0168	0.0764
581.6	0.853027	0.842768	0.941243	0.714116	0.706332	0.706929	2.03744	1.76748	2.3141	0.719675	0.624762	0.619926			581.6	0.92582	0.768046	0.809594	0.688825	0.692495	0.688696	1.60721	1.34145	1.51981	0.779042	0.721844	0.604741			163.2	0.0478	0.0596	0.0438	0.137	0.0998	0.0758	0.1558	0.1182	0.1641	0.1397	0.1132	0.1416			163.2	0.0412	0.0272	0.0163	0.0763
581.8	0.84985	0.83964	0.937563	0.711775	0.7041	0.704695	2.04788	1.77655	2.32664	0.718389	0.623838	0.616754			581.8	0.922436	0.765257	0.806692	0.686615	0.690026	0.686319	1.61399	1.34704	1.52654	0.777767	0.72034	0.602306			163.6	0.048	0.0604	0.0443	0.137	0.099	0.0761	0.1558	0.119	0.1638	0.141	0.113	0.1412			163.6	0.0393	0.0267	0.0162	0.0771
582	0.845716	0.83566	0.933133	0.709068	0.701094	0.701845	2.06025	1.78749	2.34249	0.716452	0.622277	0.612869			582	0.917997	0.76174	0.803408	0.683954	0.68699	0.683353	1.62169	1.35358	1.53408	0.775733	0.718982	0.599072			164	0.048	0.0598	0.0445	0.1373	0.099	0.0747	0.1561	0.1179	0.1631	0.1395	0.1133	0.1419			164	0.0406	0.0281	0.0161	0.0765
582.2	0.842279	0.832577	0.929599	0.706716	0.69882	0.699642	2.06996	1.79587	2.3545	0.714637	0.621054	0.60988			582.2	0.914498	0.758922	0.800642	0.681706	0.684685	0.681105	1.62732	1.35843	1.54008	0.773999	0.717696	0.596702			164.4	0.0482	0.0596	0.0453	0.1356	0.0992	0.0763	0.1544	0.1178	0.1641	0.1394	0.1142	0.1428			164.4	0.0409	0.028	0.0172	0.0765
582.4	0.838122	0.828892	0.925096	0.703754	0.695908	0.696767	2.08234	1.80636	2.36871	0.712637	0.619473	0.606432			582.4	0.910157	0.755541	0.796874	0.678699	0.681821	0.678023	1.63478	1.36459	1.5481	0.771628	0.716188	0.593448			164.8	0.0484	0.0601	0.0444	0.1365	0.0992	0.0765	0.1553	0.1173	0.1648	0.14	0.1143	0.1417			164.8	0.041	0.0278	0.0167	0.076
582.6	0.834753	0.825783	0.921582	0.70153	0.693674	0.694581	2.09253	1.81399	2.37984	0.71126	0.618177	0.603527			582.6	0.906694	0.752823	0.793899	0.676183	0.67949	0.675709	1.64066	1.36968	1.55436	0.76993	0.714866	0.590755			165.2	0.0484	0.0604	0.0453	0.1371	0.0992	0.0768	0.1559	0.1188	0.1647	0.1404	0.1138	0.1418			165.2	0.0418	0.0277	0.0168	0.0766
582.8	0.829727	0.820877	0.916351	0.697764	0.689966	0.691367	2.10707	1.82499	2.39747	0.7093	0.616596	0.600104			582.8	0.901855	0.748695	0.789833	0.672721	0.676084	0.672036	1.65034	1.37719	1.56337	0.767847	0.71338	0.587992			165.6	0.049	0.0608	0.0442	0.1364	0.0997	0.0773	0.1552	0.1175	0.1639	0.1404	0.1131	0.1415			165.6	0.0405	0.0278	0.0175	0.077
583	0.825688	0.817068	0.911734	0.694759	0.686875	0.688459	2.11903	1.83477	2.41185	0.707099	0.615439	0.597069			583	0.897923	0.74507	0.786294	0.669899	0.673175	0.669081	1.65791	1.38303	1.57126	0.76588	0.711845	0.585107			166	0.049	0.0611	0.0451	0.1368	0.0992	0.0764	0.1556	0.1182	0.1641	0.1393	0.1137	0.1416			166	0.0407	0.0281	0.0165	0.0764
583.2	0.822529	0.814103	0.908166	0.692458	0.684573	0.686046	2.12885	1.8429	2.42352	0.705123	0.614496	0.594346			583.2	0.894655	0.742292	0.783393	0.667645	0.670966	0.666688	1.66392	1.38804	1.57741	0.763928	0.710569	0.583127			166.4	0.049	0.0614	0.046	0.1374	0.1004	0.0767	0.1562	0.1184	0.1636	0.139	0.1143	0.1417			166.4	0.0409	0.0281	0.0171	0.0766
583.4	0.818349	0.810273	0.903766	0.689532	0.681727	0.683133	2.13978	1.85207	2.43691	0.703262	0.612666	0.5909			583.4	0.89034	0.738958	0.779772	0.664968	0.668216	0.663665	1.67115	1.39363	1.58465	0.762073	0.708571	0.580408			166.8	0.0488	0.062	0.0447	0.1364	0.0997	0.0781	0.1552	0.1182	0.1643	0.1399	0.1133	0.1416			166.8	0.0416	0.0286	0.0175	0.0766
583.6	0.815377	0.807229	0.90022	0.68717	0.679449	0.680981	2.14834	1.85958	2.44765	0.70171	0.611305	0.588417			583.6	0.886966	0.736354	0.777007	0.662826	0.665864	0.661278	1.67671	1.39812	1.59052	0.760722	0.707177	0.57828			167.2	0.0489	0.0602	0.0455	0.1373	0.0995	0.0782	0.1561	0.117	0.165	0.1404	0.1148	0.1417			167.2	0.0413	0.0273	0.0166	0.0773
583.8	0.811368	0.803374	0.895994	0.684187	0.676481	0.678102	2.15831	1.868	2.46016	0.69969	0.609856	0.584959			583.8	0.882749	0.732962	0.773478	0.660009	0.662977	0.658597	1.68339	1.40333	1.59639	0.758522	0.7056	0.574712			167.6	0.0486	0.0616	0.0449	0.1366	0.0991	0.078	0.1554	0.118	0.1643	0.142	0.1137	0.1427			167.6	0.0417	0.029	0.0169	0.0768
584	0.808114	0.800229	0.892515	0.681909	0.674243	0.675846	2.16638	1.87459	2.46985	0.69799	0.608707	0.582359			584	0.879401	0.730312	0.770638	0.657716	0.660706	0.656406	1.68881	1.40741	1.6012	0.756691	0.704589	0.572221			168	0.0492	0.0621	0.0464	0.1377	0.1007	0.0777	0.1565	0.1182	0.1642	0.1408	0.1137	0.142			168	0.0417	0.0274	0.0166	0.0772
584.2	0.803455	0.795688	0.887067	0.678519	0.671188	0.672178	2.17835	1.88471	2.48406	0.695977	0.607107	0.578557			584.2	0.874502	0.726196	0.766643	0.654215	0.657328	0.652962	1.69633	1.41363	1.60834	0.754133	0.70248	0.568964			168.4	0.0498	0.0622	0.0458	0.1373	0.0997	0.0778	0.1561	0.1186	0.1645	0.1404	0.1143	0.142			168.4	0.0413	0.0282	0.0184	0.0771
584.4	0.801129	0.79333	0.884548	0.676775	0.669629	0.670504	2.18365	1.88969	2.49129	0.694788	0.606554	0.57719			584.4	0.872332	0.724194	0.764549	0.65241	0.655636	0.651188	1.69993	1.41643	1.61244	0.752901	0.70127	0.567388			168.8	0.0495	0.0613	0.046	0.1369	0.1003	0.0787	0.1557	0.1177	0.1644	0.1396	0.1145	0.1411			168.8	0.0416	0.0277	0.017	0.0766
584.6	0.796563	0.788988	0.879668	0.673284	0.666469	0.666788	2.19468	1.89889	2.50492	0.692036	0.604713	0.573287			584.6	0.867508	0.720141	0.760576	0.649134	0.652328	0.648014	1.70704	1.42224	1.62029	0.750026	0.699045	0.564043			169.2	0.0496	0.0616	0.045	0.1361	0.0997	0.0781	0.1549	0.1183	0.1648	0.1392	0.1142	0.1415			169.2	0.0422	0.0285	0.0177	0.0769
584.8	0.792712	0.785156	0.875376	0.670435	0.663606	0.66387	2.20326	1.90583	2.51658	0.690168	0.603056	0.570761			584.8	0.863746	0.716902	0.757012	0.646319	0.649317	0.645446	1.71231	1.42632	1.62496	0.748205	0.696895	0.561819			169.6	0.0491	0.0619	0.0458	0.1373	0.1001	0.0786	0.1561	0.1177	0.1652	0.1394	0.1138	0.1417			169.6	0.0425	0.0288	0.0177	0.0773
585	0.789402	0.782098	0.871995	0.668296	0.661359	0.661514	2.21005	1.91164	2.52539	0.688673	0.601773	0.568385			585	0.86058	0.71426	0.754123	0.644046	0.646909	0.643333	1.71631	1.42979	1.62876	0.746795	0.695286	0.559927			170	0.0497	0.0619	0.0463	0.1365	0.1009	0.079	0.1553	0.1184	0.1648	0.1408	0.1125	0.1419			170	0.0432	0.0283	0.0178	0.0778
585.2	0.785285	0.778179	0.867819	0.665544	0.658651	0.658696	2.21809	1.91828	2.53489	0.686321	0.600252	0.566124			585.2	0.856358	0.710893	0.750497	0.641007	0.643987	0.640292	1.72149	1.43328	1.6337	0.744321	0.693694	0.557931			170.4	0.0501	0.0624	0.0465	0.1373	0.1014	0.0799	0.1561	0.1188	0.1645	0.1397	0.1129	0.1426			170.4	0.0418	0.0283	0.0177	0.0776
585.4	0.782067	0.775035	0.864278	0.663279	0.656386	0.656508	2.22457	1.92361	2.54209	0.684345	0.598791	0.564326			585.4	0.852998	0.708144	0.747398	0.638563	0.641659	0.637927	1.72572	1.43613	1.63776	0.742261	0.692276	0.555849			170.8	0.0485	0.0626	0.0462	0.1366	0.1006	0.0777	0.1554	0.1188	0.1648	0.1397	0.1139	0.1415			170.8	0.0411	0.0285	0.0174	0.0776
585.6	0.777648	0.770309	0.859172	0.660083	0.653017	0.653005	2.23377	1.9307	2.55265	0.681825	0.597506	0.560509			585.6	0.848213	0.703957	0.743565	0.634876	0.638361	0.634328	1.73137	1.44076	1.64329	0.73956	0.690128	0.552274			171.2	0.0506	0.063	0.0469	0.1375	0.1016	0.0795	0.1563	0.1181	0.1648	0.1406	0.114	0.1425			171.2	0.0422	0.0289	0.0187	0.0779
585.8	0.775271	0.767892	0.856693	0.658317	0.651159	0.651341	2.23778	1.93444	2.55852	0.680707	0.59702	0.559285			585.8	0.846158	0.702091	0.741416	0.633232	0.636691	0.63273	1.73394	1.44261	1.64589	0.738393	0.68884	0.551043			171.6	0.0501	0.0625	0.046	0.137	0.1001	0.0788	0.1558	0.1179	0.1657	0.1399	0.1139	0.1427			171.6	0.041	0.0291	0.0176	0.0785
586	0.770549	0.763398	0.851542	0.655201	0.64777	0.647848	2.24605	1.94181	2.5691	0.678154	0.595433	0.555115			586	0.841417	0.698148	0.737211	0.630085	0.633235	0.629376	1.73913	1.44639	1.65053	0.735544	0.686467	0.547933			172	0.0499	0.0632	0.0461	0.1372	0.1006	0.0799	0.156	0.1179	0.1649	0.1392	0.1137	0.1418			172	0.0414	0.0286	0.0178	0.0792
586.2	0.766931	0.759522	0.847244	0.652518	0.644935	0.644924	2.25241	1.94733	2.57669	0.675751	0.59357	0.552231			586.2	0.83745	0.694841	0.733823	0.627328	0.630298	0.626552	1.74249	1.44902	1.6542	0.7329	0.684863	0.545333			172.4	0.0508	0.0621	0.0467	0.1365	0.1016	0.0793	0.1553	0.1181	0.1654	0.1406	0.1133	0.1424			172.4	0.0424	0.0291	0.0177	0.0776
586.4	0.763858	0.756468	0.84388	0.650312	0.642647	0.642798	2.25683	1.9511	2.58215	0.674136	0.59211	0.549949			586.4	0.834216	0.692098	0.731128	0.625251	0.62797	0.624122	1.74507	1.45121	1.65647	0.730697	0.683637	0.543638			172.8	0.0496	0.0641	0.0472	0.1379	0.1015	0.0794	0.1567	0.1185	0.1649	0.1404	0.1129	0.1419			172.8	0.0423	0.0279	0.0177	0.0779
586.6	0.76008	0.752728	0.839692	0.647393	0.640026	0.64001	2.2619	1.95605	2.58841	0.672049	0.590657	0.546838			586.6	0.830269	0.688722	0.727721	0.622398	0.625151	0.621511	1.74808	1.45383	1.65882	0.728307	0.681777	0.540528			173.2	0.051	0.0639	0.0468	0.1377	0.1013	0.0796	0.1565	0.118	0.1652	0.1395	0.114	0.1424			173.2	0.0421	0.0287	0.0175	0.0773
586.8	0.757186	0.74978	0.836338	0.645092	0.637847	0.637737	2.26541	1.95991	2.59343	0.67031	0.589609	0.544473			586.8	0.827075	0.686071	0.724955	0.620129	0.622902	0.619413	1.75001	1.45608	1.66098	0.726127	0.680342	0.538508			173.6	0.0501	0.0635	0.0473	0.1373	0.1024	0.0795	0.1561	0.118	0.1653	0.1405	0.1133	0.1413			173.6	0.0423	0.0284	0.0183	0.0787
587	0.752426	0.745482	0.831441	0.641932	0.634454	0.634237	2.27189	1.96488	2.60005	0.667433	0.587828	0.540842			587	0.822161	0.682075	0.720659	0.616881	0.619561	0.616145	1.75277	1.45796	1.66485	0.723292	0.678226	0.535421			174	0.0506	0.0639	0.0462	0.1366	0.1022	0.08	0.1554	0.1174	0.1663	0.1398	0.1143	0.1415			174	0.0429	0.0295	0.0182	0.078
587.2	0.750177	0.743165	0.82893	0.640101	0.632675	0.632662	2.27439	1.96733	2.60385	0.666215	0.586925	0.53912			587.2	0.819659	0.680205	0.718648	0.615201	0.617925	0.614408	1.7537	1.45905	1.66645	0.722134	0.677016	0.533912			174.4	0.0515	0.0635	0.0476	0.1375	0.1002	0.0808	0.1563	0.1186	0.1655	0.1399	0.113	0.1421			174.4	0.0432	0.0293	0.0175	0.0794
587.4	0.745848	0.738632	0.824172	0.636759	0.62934	0.629487	2.27942	1.97204	2.61073	0.663566	0.584559	0.535926			587.4	0.815256	0.676413	0.714688	0.611854	0.614526	0.611261	1.75637	1.46168	1.6691	0.719751	0.674555	0.531498			174.8	0.0515	0.0631	0.0475	0.1369	0.1016	0.0803	0.1557	0.1181	0.1646	0.141	0.1138	0.1423			174.8	0.0418	0.0293	0.0179	0.078
587.6	0.741924	0.734875	0.820013	0.63393	0.626565	0.626674	2.28296	1.97498	2.6153	0.661113	0.582927	0.533312			587.6	0.811344	0.673337	0.711272	0.609125	0.611733	0.60871	1.75837	1.46282	1.67047	0.717175	0.673227	0.528828			175.2	0.0509	0.0637	0.0474	0.1377	0.1014	0.0809	0.1565	0.1192	0.1649	0.1406	0.1142	0.1418			175.2	0.0423	0.0289	0.0179	0.0786
587.8	0.738794	0.732016	0.816692	0.631694	0.624396	0.624425	2.2855	1.9772	2.61841	0.659322	0.581537	0.530822			587.8	0.808166	0.670839	0.708447	0.606948	0.609492	0.606495	1.75956	1.46344	1.67168	0.715426	0.672251	0.526739			175.6	0.0502	0.0647	0.048	0.1368	0.1027	0.0799	0.1556	0.1184	0.1655	0.1406	0.114	0.1425			175.6	0.0439	0.0285	0.0182	0.0787
588	0.735168	0.728533	0.812498	0.628973	0.621567	0.621715	2.28791	1.97983	2.62181	0.657116	0.580199	0.528001			588	0.804191	0.667493	0.704898	0.604075	0.606772	0.603537	1.76054	1.46489	1.67379	0.712827	0.670796	0.52393			176	0.0513	0.0641	0.0471	0.137	0.1033	0.0802	0.1558	0.1182	0.1665	0.1413	0.1139	0.1419			176	0.0422	0.0298	0.0179	0.0783
588.2	0.732291	0.725796	0.809315	0.626906	0.619426	0.619663	2.28996	1.98132	2.62455	0.655019	0.578964	0.525698			588.2	0.800983	0.664876	0.702204	0.601899	0.604599	0.601164	1.76108	1.46573	1.67546	0.710707	0.669777	0.521841			176.4	0.0514	0.064	0.0482	0.137	0.1031	0.0811	0.1558	0.1183	0.1663	0.1405	0.1136	0.1419			176.4	0.0425	0.0295	0.0184	0.0795
588.4	0.727993	0.721458	0.804417	0.623478	0.616057	0.616329	2.2933	1.98317	2.62853	0.652375	0.57686	0.522504			588.4	0.796217	0.661182	0.698588	0.598596	0.60159	0.598009	1.76248	1.46671	1.6772	0.707984	0.666876	0.51866			176.8	0.051	0.0652	0.0473	0.1373	0.1024	0.0817	0.1561	0.1184	0.1657	0.1399	0.1137	0.1413			176.8	0.0435	0.0297	0.0185	0.0797
588.6	0.725782	0.719383	0.802065	0.621793	0.614477	0.614528	2.29441	1.98384	2.62994	0.651353	0.575761	0.520616			588.6	0.794074	0.659356	0.696681	0.597102	0.599969	0.596419	1.76271	1.46718	1.67732	0.706287	0.665192	0.517105			177.2	0.0517	0.0641	0.0471	0.1364	0.1039	0.0813	0.1552	0.1189	0.166	0.1394	0.1133	0.1412			177.2	0.0429	0.0293	0.0179	0.0785
588.8	0.721413	0.715129	0.797424	0.618444	0.610949	0.611162	2.29589	1.98528	2.63384	0.648748	0.57376	0.51682			588.8	0.78947	0.655547	0.69259	0.593992	0.596604	0.593409	1.76303	1.46778	1.67876	0.703181	0.661997	0.513832			177.6	0.0516	0.0649	0.0478	0.1365	0.1017	0.0807	0.1553	0.1184	0.1651	0.1405	0.1125	0.1415			177.6	0.0422	0.0293	0.0179	0.0792
589	0.717647	0.711706	0.79331	0.615501	0.608106	0.608491	2.29641	1.9862	2.63476	0.646258	0.571543	0.514123			589	0.785552	0.652488	0.689068	0.591197	0.593797	0.590606	1.76269	1.46762	1.67892	0.700646	0.660302	0.510698			178	0.0518	0.0652	0.0481	0.137	0.1031	0.0808	0.1558	0.1178	0.1656	0.1414	0.1143	0.1422			178	0.0427	0.0291	0.0182	0.0794
589.2	0.714756	0.708979	0.7901	0.613179	0.606022	0.606291	2.29683	1.98657	2.63494	0.644	0.569822	0.512069			589.2	0.782313	0.649921	0.686298	0.588914	0.591596	0.588248	1.76229	1.46724	1.67904	0.698459	0.659004	0.508354			178.4	0.0519	0.0649	0.0476	0.1375	0.1039	0.0816	0.1563	0.1192	0.1657	0.1393	0.1138	0.1424			178.4	0.0434	0.0305	0.0182	0.0795
589.4	0.71116	0.70554	0.786216	0.610356	0.603264	0.603495	2.29701	1.98555	2.63536	0.641557	0.568142	0.509829			589.4	0.77832	0.646684	0.68309	0.586008	0.588897	0.585565	1.76113	1.46631	1.67938	0.696153	0.656356	0.505847			178.8	0.0511	0.0649	0.0487	0.1367	0.1029	0.0815	0.1555	0.1187	0.1663	0.1402	0.1135	0.1435			178.8	0.0437	0.0295	0.019	0.079
589.6	0.708139	0.7028	0.782874	0.608058	0.601064	0.60114	2.29732	1.98497	2.63592	0.639588	0.567067	0.508003			589.6	0.775155	0.644099	0.680443	0.583759	0.586746	0.58355	1.76031	1.46564	1.67911	0.694361	0.654097	0.504013			179.2	0.0531	0.0652	0.0487	0.1377	0.1033	0.082	0.1565	0.1178	0.1668	0.1393	0.1146	0.1411			179.2	0.043	0.0301	0.0181	0.0797
589.8	0.703758	0.698446	0.778076	0.604955	0.597646	0.597865	2.29578	1.9845	2.63567	0.636538	0.564426	0.504518			589.8	0.770398	0.640417	0.676439	0.58045	0.583385	0.580331	1.75838	1.46468	1.67799	0.69108	0.650776	0.500832			179.6	0.0524	0.0658	0.0477	0.136	0.1039	0.0821	0.1548	0.1178	0.1661	0.14	0.1131	0.1414			179.6	0.0435	0.0299	0.0191	0.0794
590	0.701526	0.696269	0.775668	0.603416	0.595999	0.596289	2.29534	1.98345	2.63517	0.635307	0.563022	0.502983			590	0.768112	0.63833	0.674446	0.578738	0.581692	0.578607	1.75763	1.46383	1.67716	0.689883	0.649613	0.499207			180	0.0526	0.0652	0.0487	0.1373	0.1039	0.0821	0.1561	0.1182	0.1654	0.1394	0.1139	0.1417			180	0.044	0.0296	0.0189	0.0797
590.2	0.697202	0.69196	0.770907	0.600194	0.592702	0.592868	2.29322	1.98122	2.6343	0.632329	0.560313	0.499601			590.2	0.763837	0.63493	0.670573	0.575369	0.578203	0.575347	1.75552	1.46225	1.67616	0.687014	0.646302	0.496213			180.4	0.0523	0.0651	0.0487	0.1378	0.1036	0.0829	0.1566	0.1181	0.1662	0.1397	0.114	0.1426			180.4	0.0441	0.0302	0.0191	0.0798
590.4	0.693608	0.688684	0.766789	0.597317	0.589992	0.590129	2.29149	1.97956	2.63289	0.630598	0.558396	0.497112			590.4	0.760186	0.631792	0.667393	0.572654	0.57551	0.572538	1.75419	1.46036	1.67502	0.684454	0.643886	0.493822			180.8	0.0517	0.0654	0.0482	0.1381	0.1025	0.0826	0.1569	0.1182	0.1666	0.1405	0.1144	0.1419			180.8	0.0437	0.0293	0.0191	0.0803
590.6	0.690659	0.68601	0.763566	0.595071	0.587775	0.58783	2.29026	1.97825	2.63127	0.628867	0.556813	0.495266			590.6	0.757012	0.629193	0.664664	0.570482	0.573378	0.570302	1.75287	1.45851	1.67446	0.68226	0.641904	0.492151			181.2	0.0518	0.0651	0.0485	0.1365	0.1045	0.0837	0.1553	0.1187	0.1665	0.1401	0.1147	0.1419			181.2	0.0442	0.0304	0.0196	0.0794
590.8	0.687008	0.682384	0.75955	0.592344	0.584906	0.585034	2.28777	1.97559	2.62799	0.626331	0.554952	0.492403			590.8	0.75306	0.626149	0.661366	0.567805	0.570586	0.567408	1.75025	1.45626	1.67326	0.680037	0.639099	0.48976			181.6	0.0526	0.0655	0.0478	0.1377	0.104	0.083	0.1565	0.1188	0.1657	0.1397	0.1139	0.1425			181.6	0.0439	0.03	0.0188	0.0794
591	0.684151	0.679542	0.756269	0.590171	0.582553	0.582938	2.28544	1.97306	2.62553	0.62452	0.553433	0.489934			591	0.749893	0.623643	0.658639	0.56561	0.568283	0.564958	1.74784	1.45456	1.67163	0.678091	0.637016	0.48767			182	0.0525	0.066	0.0488	0.1371	0.1033	0.0831	0.1559	0.1184	0.1668	0.1386	0.1141	0.1425			182	0.0443	0.0302	0.0191	0.0801
591.2	0.679767	0.675256	0.751743	0.586935	0.579149	0.579871	2.28135	1.96902	2.62107	0.621725	0.550747	0.487777			591.2	0.745393	0.619682	0.654839	0.562265	0.564813	0.561674	1.74378	1.45102	1.66762	0.674625	0.633688	0.485674			182.4	0.0536	0.066	0.0489	0.1371	0.1041	0.0838	0.1559	0.1186	0.1668	0.1404	0.1142	0.1416			182.4	0.0436	0.0297	0.0194	0.0805
591.4	0.676144	0.671584	0.747546	0.58419	0.576352	0.577234	2.27738	1.96585	2.61673	0.619165	0.548472	0.48537			591.4	0.741685	0.616272	0.651343	0.559619	0.562093	0.559091	1.74047	1.44789	1.66397	0.671551	0.630963	0.483747			182.8	0.0528	0.066	0.0495	0.1378	0.1041	0.0829	0.1566	0.1182	0.1662	0.1396	0.1138	0.1418			182.8	0.0436	0.0304	0.0189	0.0803
591.6	0.673293	0.668694	0.744349	0.581911	0.574207	0.575109	2.2735	1.96314	2.61295	0.616911	0.546848	0.48342			591.6	0.738588	0.613735	0.648472	0.557477	0.560057	0.556912	1.73726	1.44531	1.66158	0.668872	0.629193	0.481728			183.2	0.0534	0.066	0.0493	0.137	0.103	0.0835	0.1558	0.1175	0.1659	0.1392	0.1152	0.1417			183.2	0.0437	0.0302	0.0191	0.0803
591.8	0.669712	0.665241	0.740318	0.579098	0.571397	0.572325	2.26863	1.95944	2.60795	0.614346	0.544916	0.480723			591.8	0.734938	0.610601	0.645152	0.554723	0.557326	0.554205	1.73308	1.44199	1.6584	0.665924	0.62706	0.47943			183.6	0.0526	0.067	0.0493	0.1378	0.1047	0.0846	0.1566	0.1186	0.1656	0.1402	0.1138	0.1427			183.6	0.044	0.0313	0.0193	0.0814
592	0.666872	0.662464	0.7371	0.576868	0.569225	0.570121	2.26481	1.95642	2.60395	0.612491	0.543315	0.478794			592	0.731905	0.608278	0.642484	0.552408	0.555208	0.552004	1.72981	1.43941	1.65615	0.663946	0.625338	0.47741			184	0.0532	0.0667	0.049	0.1369	0.1046	0.0846	0.1557	0.118	0.1665	0.1407	0.1129	0.1419			184	0.0448	0.0301	0.0188	0.0796
592.2	0.663476	0.659011	0.733038	0.574188	0.566645	0.567208	2.25934	1.95201	2.59744	0.610251	0.540976	0.477114			592.2	0.728118	0.605227	0.639125	0.549765	0.552454	0.549322	1.72505	1.43498	1.65155	0.661866	0.623057	0.475715			184.4	0.0536	0.0672	0.049	0.1363	0.1052	0.084	0.1551	0.1179	0.1662	0.1407	0.1145	0.1412			184.4	0.044	0.0301	0.0186	0.0803
592.4	0.660765	0.656188	0.729938	0.572134	0.564545	0.564903	2.25452	1.94774	2.59291	0.608555	0.539272	0.475641			592.4	0.725049	0.602735	0.636447	0.547766	0.550388	0.547179	1.72116	1.43108	1.64823	0.660018	0.620727	0.474717			184.8	0.0536	0.0668	0.0497	0.1366	0.1041	0.0844	0.1554	0.1184	0.1671	0.1406	0.1142	0.1414			184.8	0.0441	0.0301	0.019	0.0797
592.6	0.656521	0.652063	0.72528	0.568797	0.56133	0.561756	2.24673	1.94168	2.58474	0.606042	0.536559	0.473068			592.6	0.720628	0.598797	0.63271	0.544588	0.546937	0.544157	1.71548	1.42644	1.64241	0.657002	0.617605	0.472953			185.2	0.054	0.0676	0.0495	0.137	0.105	0.0842	0.1558	0.1173	0.1666	0.1403	0.1146	0.1416			185.2	0.0442	0.0308	0.019	0.081
592.8	0.652888	0.648316	0.721422	0.56617	0.558669	0.559116	2.24017	1.93582	2.5769	0.603278	0.534055	0.470268			592.8	0.716997	0.595812	0.629337	0.54204	0.544104	0.541389	1.70993	1.42227	1.63802	0.654306	0.615142	0.470817			185.6	0.0539	0.0671	0.0492	0.1385	0.1036	0.0839	0.1573	0.118	0.167	0.1401	0.114	0.1422			185.6	0.0441	0.031	0.0188	0.0807
593	0.650017	0.645316	0.718472	0.564023	0.556441	0.556915	2.23501	1.93126	2.57039	0.601205	0.531741	0.468235			593	0.714002	0.593324	0.626726	0.539922	0.541844	0.539135	1.70596	1.41869	1.63479	0.652063	0.613254	0.468983			186	0.0533	0.0678	0.0489	0.1379	0.1055	0.0845	0.1567	0.1174	0.1678	0.1415	0.114	0.1425			186	0.044	0.0312	0.0197	0.0817
593.2	0.646548	0.642002	0.714525	0.561123	0.553654	0.554271	2.22776	1.92517	2.56254	0.599131	0.529895	0.466326			593.2	0.710449	0.590259	0.623553	0.537164	0.539261	0.536353	1.69999	1.4136	1.62999	0.649561	0.610488	0.46701			186.4	0.0532	0.0679	0.049	0.138	0.1049	0.0845	0.1568	0.1176	0.1654	0.1393	0.1131	0.1422			186.4	0.0452	0.0314	0.0197	0.0814
593.4	0.643653	0.63924	0.71136	0.558863	0.55137	0.552066	2.22179	1.92064	2.55568	0.597189	0.528221	0.464522			593.4	0.707499	0.587791	0.620872	0.535013	0.537232	0.534182	1.6949	1.40924	1.62571	0.647218	0.608169	0.465594			186.8	0.0537	0.067	0.0496	0.1368	0.1052	0.085	0.1556	0.1187	0.1675	0.1383	0.1143	0.1416			186.8	0.0443	0.0308	0.019	0.0812
593.6	0.639458	0.635176	0.706712	0.555627	0.548111	0.548771	2.21264	1.91298	2.54584	0.593976	0.525716	0.462592			593.6	0.702956	0.583703	0.6169	0.531757	0.534089	0.531107	1.68721	1.40396	1.61861	0.643782	0.604718	0.463993			187.2	0.0541	0.0674	0.049	0.1368	0.1062	0.0855	0.1556	0.1182	0.1671	0.1394	0.1141	0.1419			187.2	0.0449	0.0306	0.0194	0.0812
593.8	0.637409	0.633095	0.70437	0.553905	0.546427	0.547291	2.20782	1.90858	2.54055	0.592481	0.524091	0.46085			593.8	0.700789	0.581847	0.614972	0.530244	0.532329	0.529433	1.68328	1.40073	1.61508	0.642005	0.603053	0.462762			187.6	0.0546	0.068	0.0492	0.137	0.1045	0.0849	0.1558	0.1182	0.1678	0.1396	0.1147	0.142			187.6	0.0452	0.0314	0.0196	0.0809
594	0.633176	0.628853	0.699776	0.550845	0.543293	0.543982	2.19699	1.89956	2.52933	0.588949	0.521343	0.458319			594	0.696453	0.578248	0.611011	0.527217	0.528938	0.526127	1.67463	1.39426	1.60649	0.638396	0.600065	0.460371			188	0.0548	0.0683	0.0498	0.1375	0.1042	0.0854	0.1563	0.1183	0.1671	0.1399	0.1135	0.1422			188	0.044	0.0312	0.0193	0.0816
594.2	0.629749	0.625472	0.696062	0.548238	0.540733	0.54124	2.18822	1.89227	2.5196	0.586565	0.5187	0.456555			594.2	0.692957	0.575181	0.607958	0.524744	0.526409	0.523451	1.66755	1.3884	1.59995	0.635323	0.596999	0.458793			188.4	0.0541	0.0686	0.0495	0.1377	0.1054	0.086	0.1565	0.1177	0.1669	0.1405	0.1137	0.1429			188.4	0.0448	0.031	0.0197	0.081
594.4	0.627176	0.622969	0.692941	0.546168	0.53879	0.539186	2.1811	1.8863	2.51145	0.584276	0.516672	0.454771			594.4	0.6902	0.57271	0.605469	0.522766	0.524443	0.521357	1.66224	1.38353	1.5947	0.632881	0.594568	0.45733			188.8	0.0545	0.0679	0.0495	0.1385	0.1054	0.0856	0.1573	0.118	0.167	0.1391	0.1137	0.1424			188.8	0.0445	0.0315	0.0202	0.0818
594.6	0.62379	0.619652	0.689121	0.543383	0.536043	0.536354	2.17191	1.87809	2.50087	0.582153	0.51455	0.452323			594.6	0.686371	0.569918	0.602403	0.520146	0.521735	0.518757	1.65508	1.37756	1.58741	0.630189	0.591605	0.454452			189.2	0.0544	0.0683	0.0509	0.1379	0.1065	0.0861	0.1567	0.1181	0.1666	0.1396	0.1147	0.1427			189.2	0.0448	0.0312	0.0198	0.0807
594.8	0.621001	0.617052	0.686208	0.54118	0.533854	0.533997	2.16388	1.87114	2.49162	0.580268	0.512783	0.450726			594.8	0.683411	0.567609	0.599796	0.518026	0.519568	0.516562	1.64921	1.37228	1.5817	0.627894	0.589225	0.452339			189.6	0.0546	0.0684	0.0503	0.1377	0.1059	0.0859	0.1565	0.1182	0.1678	0.1394	0.1133	0.142			189.6	0.0446	0.0311	0.0195	0.0814
595	0.616972	0.613047	0.681759	0.538131	0.530705	0.530947	2.15198	1.86061	2.4779	0.577301	0.509516	0.448465			595	0.679203	0.564136	0.596103	0.514878	0.516317	0.51354	1.64006	1.36434	1.57253	0.624413	0.585985	0.45018			190	0.0544	0.067	0.0506	0.138	0.106	0.0853	0.1568	0.1174	0.1667	0.1398	0.115	0.1418			190	0.0452	0.0313	0.0196	0.0817
595.2	0.614944	0.611047	0.679597	0.536451	0.529074	0.52937	2.14549	1.85498	2.47071	0.575605	0.507682	0.447365			595.2	0.677136	0.562299	0.594344	0.513335	0.514631	0.51203	1.63571	1.35985	1.56752	0.622737	0.583962	0.448788			190.4	0.0542	0.0687	0.05	0.1375	0.1054	0.0861	0.1563	0.1175	0.167	0.1398	0.1145	0.1423			190.4	0.0446	0.0313	0.0192	0.083
595.4	0.610685	0.607072	0.675083	0.533419	0.525749	0.526262	2.13299	1.84396	2.45753	0.572309	0.505292	0.444254			595.4	0.672779	0.558597	0.590513	0.51021	0.511587	0.508849	1.62604	1.3524	1.55849	0.619178	0.580059	0.446466			190.8	0.055	0.0684	0.0507	0.1388	0.1051	0.0874	0.1576	0.1186	0.1669	0.1399	0.1142	0.1418			190.8	0.045	0.0319	0.0202	0.082
595.6	0.607262	0.603849	0.671244	0.530682	0.523092	0.523631	2.1226	1.83495	2.44538	0.569793	0.502665	0.441661			595.6	0.669135	0.555797	0.587499	0.507484	0.508915	0.506247	1.61763	1.34627	1.54997	0.616374	0.576774	0.443541			191.2	0.0551	0.0691	0.0507	0.1378	0.1066	0.0862	0.1566	0.1179	0.1669	0.1397	0.1139	0.1426			191.2	0.0454	0.0316	0.0193	0.0815
595.8	0.604595	0.60128	0.6683	0.528627	0.520914	0.521482	2.11395	1.8271	2.43521	0.567597	0.500545	0.439835			595.8	0.66614	0.553644	0.585203	0.505315	0.506923	0.504167	1.61117	1.34072	1.54356	0.613917	0.574307	0.441661			191.6	0.0554	0.0687	0.0506	0.1382	0.1066	0.0864	0.157	0.1185	0.1679	0.1396	0.1145	0.1419			191.6	0.0445	0.0322	0.0198	0.0823
596	0.60126	0.597964	0.664624	0.525968	0.518192	0.518734	2.10299	1.81731	2.42264	0.565293	0.498052	0.438258			596	0.662517	0.550647	0.581906	0.502754	0.504382	0.501756	1.6028	1.33305	1.53537	0.610875	0.571299	0.439549			192	0.055	0.0695	0.0507	0.1379	0.1068	0.0861	0.1567	0.1192	0.1673	0.1397	0.1142	0.1413			192	0.0452	0.0312	0.0202	0.0814
596.2	0.598684	0.59532	0.661644	0.523936	0.516101	0.516626	2.09369	1.80948	2.4126	0.563723	0.496059	0.437387			596.2	0.659655	0.548352	0.579435	0.500639	0.50238	0.499719	1.59575	1.32694	1.52882	0.608835	0.568842	0.438225			192.4	0.0553	0.0683	0.0501	0.1371	0.1064	0.0864	0.1559	0.1186	0.1677	0.1403	0.1136	0.1418			192.4	0.0456	0.0322	0.0196	0.0817
596.4	0.594581	0.591394	0.657309	0.520721	0.513088	0.513534	2.08034	1.79719	2.39679	0.560372	0.493208	0.434877			596.4	0.655167	0.544841	0.57555	0.49765	0.499256	0.496696	1.58532	1.31847	1.51798	0.604972	0.565396	0.436554			192.8	0.0546	0.0696	0.0511	0.1374	0.1062	0.0877	0.1562	0.118	0.1681	0.1412	0.1143	0.1415			192.8	0.0449	0.0317	0.0195	0.082
596.6	0.591247	0.588231	0.653748	0.518051	0.510529	0.511061	2.06934	1.78689	2.38391	0.557771	0.490762	0.433217			596.6	0.651596	0.54183	0.572554	0.495002	0.49639	0.494024	1.57711	1.31073	1.50886	0.602107	0.562418	0.434442			193.2	0.0556	0.0697	0.0518	0.1372	0.1068	0.0877	0.156	0.1181	0.1678	0.1402	0.1133	0.1412			193.2	0.0456	0.0316	0.0207	0.0824
596.8	0.588522	0.585663	0.650835	0.515895	0.508371	0.509091	2.06011	1.77837	2.37277	0.555629	0.488994	0.431226			596.8	0.648842	0.539491	0.57023	0.492949	0.494061	0.49201	1.56992	1.30457	1.50155	0.599823	0.560189	0.432399			193.6	0.0547	0.0698	0.0518	0.138	0.106	0.0872	0.1568	0.1186	0.1677	0.1402	0.1135	0.1423			193.6	0.0465	0.0322	0.0205	0.0821
597	0.585367	0.582395	0.647393	0.513156	0.505715	0.506492	2.04761	1.76785	2.35804	0.553144	0.486493	0.429212			597	0.645421	0.536626	0.567028	0.490368	0.491552	0.489368	1.56073	1.29672	1.49231	0.596756	0.55728	0.429889			194	0.0557	0.0698	0.0507	0.1369	0.1072	0.0882	0.1557	0.1189	0.1672	0.1393	0.1138	0.1422			194	0.0464	0.032	0.0204	0.0824
597.2	0.582744	0.57985	0.644611	0.511032	0.50368	0.504402	2.03776	1.75905	2.34642	0.551083	0.484677	0.427774			597.2	0.64272	0.53431	0.56444	0.488227	0.489651	0.487365	1.55374	1.29033	1.4852	0.59414	0.554932	0.427422			194.4	0.0551	0.0697	0.0505	0.1377	0.1064	0.0869	0.1565	0.1186	0.1674	0.1397	0.1149	0.1418			194.4	0.0461	0.0315	0.02	0.0835
597.4	0.578901	0.576046	0.640207	0.507644	0.500565	0.501355	2.02329	1.74556	2.32918	0.547589	0.481252	0.425353			597.4	0.63834	0.530682	0.560979	0.484938	0.486794	0.48443	1.54223	1.28028	1.47464	0.590123	0.550853	0.424806			194.8	0.0558	0.0696	0.0514	0.1371	0.1073	0.087	0.1559	0.118	0.1676	0.1398	0.1149	0.1416			194.8	0.046	0.0315	0.0202	0.0837
597.6	0.576835	0.573985	0.638129	0.506059	0.49903	0.499713	2.01614	1.73923	2.32078	0.54582	0.4798	0.424295			597.6	0.636341	0.528974	0.559256	0.483464	0.485066	0.482756	1.53627	1.27565	1.46923	0.588359	0.549186	0.423297			195.2	0.0554	0.0694	0.0512	0.1379	0.1067	0.0875	0.1567	0.1177	0.1686	0.1411	0.1139	0.142			195.2	0.0459	0.0324	0.0195	0.0829
597.8	0.57284	0.570056	0.634054	0.503039	0.495904	0.496475	2.00031	1.72595	2.30402	0.541774	0.476774	0.422162			597.8	0.632233	0.52557	0.555459	0.480338	0.482069	0.47988	1.52442	1.26613	1.45864	0.584539	0.545419	0.421491			195.6	0.0562	0.0701	0.0515	0.1378	0.1069	0.0879	0.1566	0.1179	0.1676	0.1394	0.113	0.142			195.6	0.0465	0.0324	0.0199	0.082
598	0.569505	0.566857	0.630501	0.500429	0.493179	0.493972	1.98698	1.71505	2.28973	0.538996	0.474438	0.419839			598	0.62873	0.522886	0.552472	0.477679	0.479578	0.477422	1.51473	1.25826	1.44967	0.581907	0.54252	0.4191			196	0.0561	0.0697	0.0518	0.1372	0.1074	0.0878	0.156	0.1175	0.1688	0.1402	0.1136	0.1429			196	0.0464	0.0324	0.0202	0.0831
598.2	0.566918	0.564346	0.627584	0.498346	0.491034	0.492019	1.97641	1.70615	2.27822	0.536735	0.472696	0.418329			598.2	0.625841	0.520564	0.550062	0.475611	0.47758	0.47545	1.50671	1.25177	1.44238	0.579267	0.539997	0.417688			196.4	0.0561	0.0698	0.0515	0.1377	0.1069	0.0879	0.1565	0.1184	0.1677	0.1399	0.1138	0.141			196.4	0.0465	0.0322	0.02	0.0832
598.4	0.563647	0.561174	0.624006	0.49574	0.48842	0.489422	1.96322	1.69446	2.26287	0.534007	0.470491	0.416128			598.4	0.622303	0.517664	0.547134	0.473171	0.475033	0.47291	1.49668	1.24382	1.4335	0.575844	0.537242	0.41569			196.8	0.0559	0.0702	0.0519	0.1374	0.1067	0.0885	0.1562	0.117	0.1679	0.1397	0.1143	0.1427			196.8	0.0457	0.0324	0.0198	0.0839
598.6	0.561097	0.558786	0.621221	0.493616	0.486405	0.487395	1.95276	1.68505	2.25001	0.531897	0.468756	0.414968			598.6	0.619447	0.515296	0.544762	0.471155	0.473107	0.470717	1.48885	1.23754	1.42626	0.573018	0.535362	0.414601			197.2	0.0559	0.0707	0.0516	0.1372	0.1076	0.0884	0.156	0.1184	0.1673	0.1397	0.1152	0.1419			197.2	0.0465	0.0329	0.02	0.0829
598.8	0.55733	0.555005	0.617233	0.490871	0.483183	0.484464	1.93679	1.67132	2.23058	0.528105	0.465765	0.413242			598.8	0.615529	0.511841	0.541029	0.468109	0.470145	0.467856	1.47728	1.22701	1.41525	0.569114	0.53217	0.412902			197.6	0.0552	0.0703	0.0519	0.137	0.1068	0.0898	0.1558	0.1176	0.1675	0.1402	0.114	0.142			197.6	0.0454	0.0322	0.0208	0.0832
599	0.555301	0.553135	0.615179	0.489321	0.48161	0.48292	1.92899	1.66486	2.22105	0.526267	0.464441	0.411921			599	0.613583	0.509962	0.539199	0.466624	0.468634	0.466425	1.47156	1.22241	1.40993	0.566957	0.530839	0.411911			198	0.0561	0.0702	0.0521	0.1379	0.1075	0.0893	0.1567	0.1178	0.1677	0.14	0.1121	0.1417			198	0.0472	0.033	0.0195	0.0828
599.2	0.551364	0.54946	0.610817	0.486317	0.478503	0.479974	1.91222	1.65146	2.20269	0.522588	0.461614	0.409493			599.2	0.609789	0.50656	0.535474	0.463914	0.465627	0.463172	1.459	1.21282	1.39825	0.563122	0.527776	0.409868			198.4	0.0564	0.0707	0.0523	0.1384	0.107	0.09	0.1572	0.1184	0.1674	0.1406	0.1131	0.142			198.4	0.0466	0.0332	0.0205	0.0835
599.4	0.548413	0.54654	0.607469	0.483737	0.475886	0.477562	1.89799	1.63977	2.18726	0.519728	0.459286	0.407052			599.4	0.606404	0.503788	0.532524	0.461311	0.463147	0.460764	1.44848	1.20459	1.38849	0.559675	0.525167	0.407669			198.8	0.0567	0.0709	0.0525	0.1385	0.108	0.0889	0.1573	0.1184	0.1675	0.14	0.114	0.1424			198.8	0.0464	0.0326	0.0206	0.0841
599.6	0.545857	0.544151	0.604859	0.481719	0.47379	0.47567	1.88657	1.62997	2.17453	0.517368	0.457526	0.40539			599.6	0.603766	0.501539	0.530272	0.459247	0.461207	0.458825	1.43975	1.19754	1.38086	0.556899	0.523156	0.406065			199.2	0.0566	0.0712	0.0522	0.1387	0.1065	0.0887	0.1575	0.1185	0.1677	0.1391	0.1138	0.141			199.2	0.0461	0.0318	0.0207	0.0831
599.8	0.542121	0.540496	0.600826	0.478637	0.470804	0.472494	1.86976	1.61547	2.15518	0.514034	0.454551	0.402361			599.8	0.599792	0.498261	0.526699	0.456482	0.458411	0.455966	1.42753	1.18781	1.36863	0.553487	0.520193	0.402467			199.6	0.0566	0.0705	0.0521	0.1371	0.1084	0.0896	0.1559	0.1183	0.1671	0.1392	0.1152	0.142			199.6	0.0465	0.033	0.0205	0.0843
600	0.540253	0.538646	0.598734	0.477255	0.469257	0.471094	1.86159	1.60846	2.14561	0.512448	0.453133	0.400928			600	0.597768	0.496585	0.524915	0.455134	0.457062	0.454462	1.4213	1.18282	1.36315	0.551729	0.518738	0.40084			200	0.0565	0.0714	0.0524	0.1372	0.107	0.0898	0.156	0.1178	0.1673	0.1398	0.1145	0.1422			200	0.0465	0.0328	0.02	0.0848
600.2	0.536429	0.534993	0.594561	0.474224	0.466501	0.468019	1.84463	1.59395	2.12683	0.508753	0.449868	0.398972			600.2	0.593697	0.493259	0.521555	0.452189	0.454414	0.451545	1.40859	1.1722	1.35188	0.547627	0.515172	0.399463			200.4	0.0574	0.0718	0.0521	0.1377	0.1078	0.0891	0.1565	0.1173	0.1682	0.1407	0.114	0.142			200.4	0.0462	0.0321	0.0204	0.0839
600.4	0.533215	0.531961	0.591182	0.471789	0.463975	0.465553	1.83059	1.58203	2.1108	0.505642	0.447603	0.397515			600.4	0.590332	0.490589	0.518705	0.449841	0.452003	0.449096	1.39803	1.16344	1.34202	0.544603	0.512879	0.398321			200.8	0.0567	0.0718	0.0527	0.1379	0.1078	0.0904	0.1567	0.1177	0.169	0.1403	0.1138	0.1417			200.8	0.0472	0.0334	0.0202	0.0833
600.6	0.530638	0.529555	0.588576	0.469814	0.461978	0.4636	1.81933	1.57259	2.09788	0.503552	0.445675	0.396115			600.6	0.587644	0.488383	0.516255	0.44786	0.450096	0.447076	1.39009	1.15676	1.33424	0.542264	0.510506	0.397288			201.2	0.0565	0.0715	0.0535	0.1374	0.1083	0.09	0.1562	0.1178	0.169	0.1398	0.1139	0.1427			201.2	0.0467	0.0325	0.0216	0.0821
600.8	0.527617	0.526646	0.585304	0.467495	0.459435	0.461302	1.80528	1.56046	2.08113	0.501171	0.443869	0.394082			600.8	0.584363	0.485709	0.513234	0.445521	0.447575	0.444941	1.3795	1.14822	1.32472	0.539512	0.508163	0.395571			201.6	0.0568	0.0722	0.0525	0.138	0.1083	0.0908	0.1568	0.1182	0.1681	0.1401	0.1147	0.1415			201.6	0.0472	0.0323	0.0206	0.0832
601	0.525298	0.524193	0.582642	0.465505	0.457382	0.459443	1.79402	1.55066	2.06761	0.499493	0.442074	0.392447			601	0.58156	0.483531	0.510852	0.443576	0.445733	0.443149	1.37106	1.1416	1.31677	0.537463	0.506202	0.39395			202	0.0565	0.0713	0.0527	0.1377	0.1086	0.0901	0.1565	0.118	0.168	0.1409	0.1135	0.1424			202	0.0463	0.0324	0.0211	0.0848
601.2	0.521826	0.520532	0.578417	0.462582	0.454486	0.45661	1.77789	1.53617	2.04785	0.496473	0.438793	0.390539			601.2	0.577665	0.480053	0.507334	0.440777	0.442826	0.440109	1.35901	1.13155	1.30531	0.534096	0.502646	0.392116			202.4	0.0566	0.0722	0.0521	0.1386	0.1084	0.0911	0.1574	0.1178	0.1687	0.1389	0.1144	0.1411			202.4	0.0469	0.0326	0.0205	0.0844
601.4	0.519969	0.518732	0.576449	0.461046	0.453147	0.455019	1.76962	1.52916	2.03815	0.494928	0.437275	0.38964			601.4	0.575756	0.478452	0.505661	0.439433	0.441461	0.438609	1.35251	1.12699	1.2994	0.532025	0.501359	0.391088			202.8	0.0572	0.0722	0.0529	0.1373	0.1076	0.0908	0.1561	0.1191	0.1671	0.1401	0.1139	0.1413			202.8	0.0466	0.0332	0.021	0.0842
601.6	0.516343	0.515294	0.572508	0.458034	0.450336	0.452024	1.75277	1.51483	2.01875	0.491699	0.434188	0.388443			601.6	0.571857	0.475413	0.502382	0.436551	0.438609	0.435648	1.34037	1.11706	1.28737	0.528941	0.497823	0.389493			203.2	0.0574	0.0721	0.0532	0.1383	0.1082	0.091	0.1571	0.1182	0.1679	0.1404	0.1151	0.142			203.2	0.0469	0.0339	0.0201	0.0848
601.8	0.513147	0.512244	0.569181	0.455661	0.448014	0.449629	1.73817	1.50262	2.0027	0.488981	0.431435	0.386452			601.8	0.568734	0.472741	0.499518	0.434227	0.436253	0.433437	1.32939	1.10816	1.27684	0.526221	0.494967	0.387288			203.6	0.0577	0.0715	0.0538	0.1377	0.1079	0.0914	0.1565	0.1186	0.169	0.1394	0.1139	0.1419			203.6	0.0465	0.0338	0.0207	0.0843
602	0.510675	0.509812	0.56652	0.453546	0.446033	0.447804	1.72663	1.49279	1.98986	0.486971	0.429409	0.385012			602	0.566151	0.470629	0.49735	0.432383	0.434337	0.431704	1.32063	1.10102	1.26866	0.524073	0.49277	0.385723			204	0.0575	0.0721	0.0525	0.1373	0.1087	0.0904	0.1561	0.1186	0.1681	0.1385	0.1147	0.1415			204	0.0463	0.0329	0.0209	0.0843
602.2	0.5072	0.506333	0.562538	0.45044	0.443287	0.445097	1.7101	1.47773	1.97076	0.484242	0.426289	0.382755			602.2	0.5622	0.467496	0.49398	0.429524	0.431408	0.428769	1.30778	1.08956	1.25582	0.521048	0.489086	0.383611			204.4	0.0578	0.0729	0.0534	0.1379	0.1091	0.0907	0.1567	0.1179	0.1679	0.1402	0.1143	0.1423			204.4	0.047	0.0333	0.021	0.0844
602.4	0.505461	0.504558	0.560667	0.448901	0.44198	0.443529	1.70199	1.47031	1.96073	0.482633	0.424878	0.381809			602.4	0.56018	0.466009	0.492318	0.428128	0.430119	0.427284	1.30141	1.08427	1.24949	0.519329	0.487325	0.382455			204.8	0.0576	0.0724	0.0532	0.1384	0.1089	0.091	0.1572	0.1182	0.1686	0.1399	0.1129	0.1427			204.8	0.0476	0.0329	0.0204	0.0843
602.6	0.501822	0.500944	0.556985	0.445869	0.439156	0.440535	1.6857	1.45592	1.94078	0.47913	0.422542	0.380046			602.6	0.556265	0.462728	0.489004	0.425222	0.427219	0.424516	1.2894	1.07423	1.23736	0.515809	0.484014	0.380584			205.2	0.0578	0.0727	0.0545	0.1374	0.1098	0.0918	0.1562	0.1181	0.1685	0.1396	0.1142	0.1425			205.2	0.0472	0.0339	0.0207	0.084
602.8	0.498771	0.498092	0.553617	0.443438	0.436939	0.438051	1.67152	1.44383	1.9246	0.476362	0.419886	0.378637			602.8	0.553062	0.460133	0.486133	0.422891	0.424928	0.422178	1.27898	1.06546	1.22703	0.512876	0.481085	0.378481			205.6	0.0577	0.0726	0.053	0.1369	0.1085	0.0918	0.1557	0.1177	0.1682	0.1405	0.1138	0.1412			205.6	0.0477	0.0335	0.0209	0.0842
603	0.496411	0.495789	0.550894	0.441611	0.435197	0.436178	1.65997	1.43397	1.91151	0.474177	0.418038	0.377685			603	0.550448	0.458178	0.483887	0.421023	0.422995	0.420284	1.27072	1.05851	1.21902	0.510641	0.478665	0.377281			206	0.0572	0.0727	0.0541	0.1374	0.1089	0.0912	0.1562	0.1184	0.1678	0.1402	0.115	0.1418			206	0.0467	0.0327	0.0206	0.085
603.2	0.493552	0.492798	0.547661	0.439296	0.432996	0.433938	1.64571	1.42187	1.8953	0.471811	0.415709	0.376579			603.2	0.547382	0.455631	0.481212	0.418748	0.420733	0.418093	1.25982	1.04985	1.20928	0.507675	0.475644	0.376041			206.4	0.0579	0.0733	0.0539	0.1387	0.1088	0.0921	0.1575	0.1177	0.1688	0.1393	0.1138	0.1421			206.4	0.047	0.0331	0.0208	0.0855
603.4	0.491291	0.490408	0.545046	0.437368	0.43118	0.431961	1.63429	1.41195	1.88248	0.469642	0.413721	0.375777			603.4	0.544818	0.453591	0.479052	0.416927	0.418973	0.416336	1.25124	1.04318	1.20141	0.505247	0.473175	0.37466			206.8	0.0578	0.0725	0.0534	0.138	0.1098	0.0918	0.1568	0.1178	0.1684	0.1405	0.1143	0.1418			206.8	0.0478	0.0334	0.0209	0.0848
603.6	0.488054	0.486988	0.541448	0.434702	0.428277	0.429014	1.61793	1.39804	1.8619	0.466938	0.411312	0.373773			603.6	0.540895	0.450605	0.475657	0.413933	0.416076	0.413828	1.23914	1.03358	1.18925	0.501843	0.469699	0.372561			207.2	0.0579	0.0733	0.0549	0.1379	0.1085	0.0922	0.1567	0.1175	0.168	0.1407	0.114	0.1426			207.2	0.0475	0.0334	0.0205	0.0855
603.8	0.485298	0.484079	0.538156	0.43238	0.425971	0.426498	1.6037	1.38624	1.84576	0.464405	0.408821	0.371972			603.8	0.537892	0.447978	0.472979	0.411801	0.413804	0.411578	1.2282	1.02528	1.17906	0.499088	0.466701	0.370572			207.6	0.0585	0.0722	0.0535	0.1377	0.1092	0.0925	0.1565	0.1187	0.1688	0.1399	0.113	0.1422			207.6	0.0479	0.0337	0.0207	0.0852
604	0.482985	0.481822	0.535557	0.430479	0.42421	0.42459	1.59215	1.37654	1.83276	0.462302	0.406701	0.370636			604	0.535493	0.445988	0.470862	0.410038	0.411957	0.409799	1.21995	1.01851	1.17054	0.496478	0.464245	0.369024			208	0.0578	0.0731	0.0543	0.1378	0.1084	0.0925	0.1566	0.1184	0.1681	0.1402	0.1143	0.142			208	0.047	0.0337	0.022	0.0851
604.2	0.480105	0.47919	0.532481	0.428043	0.422133	0.422211	1.57765	1.36467	1.81632	0.459619	0.404193	0.369642			604.2	0.532482	0.44341	0.468126	0.407793	0.409811	0.40765	1.20911	1.00949	1.15998	0.493338	0.461213	0.367204			208.4	0.0588	0.0738	0.0542	0.1385	0.1087	0.0925	0.1573	0.1182	0.1683	0.1401	0.1136	0.1428			208.4	0.0473	0.0339	0.0205	0.085
604.4	0.477695	0.477093	0.529966	0.426135	0.420403	0.420356	1.56621	1.35493	1.80317	0.457611	0.402223	0.368937			604.4	0.530024	0.441313	0.465973	0.405945	0.408054	0.405959	1.20037	1.00243	1.15162	0.490637	0.458928	0.366061			208.8	0.0585	0.0733	0.0544	0.1373	0.109	0.0922	0.1561	0.1175	0.1684	0.1406	0.1143	0.1417			208.8	0.0465	0.0335	0.0211	0.0853
604.6	0.474425	0.473867	0.526194	0.42327	0.417476	0.417552	1.54919	1.34068	1.78342	0.454508	0.399601	0.366477			604.6	0.526504	0.438466	0.462809	0.403427	0.405406	0.403412	1.18781	0.991703	1.1393	0.487631	0.455684	0.363445			209.2	0.0582	0.074	0.0546	0.1381	0.1094	0.0933	0.1569	0.1182	0.1683	0.1406	0.1137	0.1422			209.2	0.0477	0.0337	0.0207	0.0848
604.8	0.472719	0.472261	0.524414	0.421868	0.416179	0.416131	1.54127	1.33381	1.77402	0.453011	0.398079	0.365024			604.8	0.524766	0.437007	0.461258	0.402011	0.404126	0.402162	1.18183	0.986403	1.13307	0.485827	0.454163	0.361964			209.6	0.0586	0.074	0.055	0.1383	0.109	0.0933	0.1571	0.118	0.1685	0.1392	0.114	0.1427			209.6	0.0471	0.0333	0.021	0.0857
605	0.469586	0.468974	0.520849	0.419171	0.413502	0.413405	1.52519	1.31965	1.75514	0.450112	0.395998	0.363021			605	0.521116	0.434018	0.458077	0.399293	0.401431	0.399513	1.16993	0.975783	1.12111	0.48221	0.451348	0.360237			210	0.0591	0.0742	0.055	0.1373	0.1085	0.0922	0.1561	0.1181	0.1693	0.1406	0.1137	0.1427			210	0.0481	0.0339	0.0212	0.0852
605.2	0.466976	0.466352	0.517726	0.416845	0.411183	0.411119	1.51125	1.30759	1.73967	0.447549	0.393515	0.361566			605.2	0.518157	0.431627	0.455462	0.397079	0.399212	0.397248	1.15971	0.967561	1.11216	0.479132	0.448344	0.358508			210.4	0.0593	0.0746	0.0548	0.1377	0.1099	0.0933	0.1565	0.1189	0.1694	0.1401	0.1137	0.1418			210.4	0.0481	0.0341	0.0212	0.0858
605.4	0.464803	0.464207	0.515301	0.415026	0.409443	0.409244	1.50007	1.29816	1.72703	0.445457	0.391547	0.360705			605.4	0.515638	0.429683	0.453388	0.395319	0.39748	0.395363	1.15144	0.961137	1.10509	0.476602	0.446157	0.357106			210.8	0.0595	0.0744	0.0543	0.1379	0.1087	0.0926	0.1567	0.1182	0.1691	0.1411	0.1131	0.1423			210.8	0.0478	0.0342	0.0206	0.0855
605.6	0.461428	0.46097	0.511568	0.412469	0.406605	0.406427	1.48323	1.28417	1.70763	0.44268	0.388513	0.358799			605.6	0.51218	0.426549	0.450252	0.392723	0.39501	0.392856	1.13951	0.951497	1.09428	0.472801	0.442302	0.354497			211.2	0.0583	0.0737	0.0544	0.1386	0.1099	0.0931	0.1574	0.1191	0.1695	0.1397	0.114	0.1415			211.2	0.0476	0.0339	0.0214	0.0862
605.8	0.459749	0.459313	0.509715	0.41111	0.405192	0.404992	1.4747	1.27704	1.69789	0.441099	0.387251	0.357805			605.8	0.510439	0.425039	0.448857	0.391442	0.393762	0.391506	1.13318	0.946577	1.08839	0.470936	0.441006	0.353092			211.6	0.0597	0.0745	0.0552	0.1384	0.1093	0.0935	0.1572	0.1175	0.1685	0.141	0.1147	0.1414			211.6	0.0472	0.034	0.0218	0.086
606	0.456334	0.456309	0.506096	0.408439	0.402468	0.402405	1.4584	1.26249	1.67885	0.438278	0.384317	0.355631			606	0.506975	0.422116	0.445628	0.388815	0.39122	0.388743	1.12147	0.935988	1.07632	0.467717	0.437607	0.350949			212	0.0589	0.0747	0.0549	0.1378	0.1096	0.0943	0.1566	0.1174	0.1686	0.14	0.114	0.1419			212	0.0484	0.0342	0.0211	0.0862
606.2	0.453657	0.453686	0.503122	0.40632	0.400049	0.400008	1.44534	1.25117	1.66329	0.435914	0.381697	0.354602			606.2	0.504217	0.419555	0.443075	0.386551	0.389206	0.386535	1.1117	0.927621	1.06682	0.464838	0.434696	0.349698			212.4	0.059	0.0745	0.0555	0.1372	0.1097	0.0941	0.156	0.1178	0.1696	0.1397	0.1136	0.1427			212.4	0.0476	0.0346	0.0219	0.0856
606.4	0.45147	0.45161	0.500695	0.404478	0.398184	0.398075	1.43481	1.2422	1.65077	0.433796	0.379834	0.353557			606.4	0.50196	0.417539	0.440949	0.384776	0.387472	0.384734	1.10395	0.921139	1.05917	0.462364	0.432488	0.348366			212.8	0.0596	0.0738	0.0547	0.1385	0.109	0.0935	0.1573	0.1182	0.1694	0.1404	0.1138	0.1425			212.8	0.0483	0.0351	0.0211	0.0867
606.6	0.447928	0.448568	0.497091	0.401701	0.395384	0.395517	1.4187	1.22877	1.63191	0.430835	0.377069	0.350995			606.6	0.498344	0.414655	0.437829	0.38207	0.384805	0.382018	1.09208	0.911061	1.04715	0.459057	0.429265	0.346035			213.2	0.0593	0.0749	0.0548	0.1371	0.1089	0.0938	0.1559	0.1195	0.1691	0.1413	0.1142	0.1425			213.2	0.0482	0.0339	0.0221	0.086
606.8	0.446342	0.447057	0.495292	0.400228	0.394063	0.394373	1.41074	1.22109	1.62271	0.429414	0.375649	0.349518			606.8	0.496796	0.413161	0.436268	0.380914	0.383396	0.380603	1.08601	0.905461	1.0411	0.457662	0.427613	0.344373			213.6	0.0593	0.0754	0.0549	0.1381	0.1083	0.0943	0.1569	0.1185	0.1693	0.1391	0.1141	0.1423			213.6	0.0478	0.0342	0.0213	0.0855
607	0.443132	0.444126	0.491572	0.397494	0.391299	0.391977	1.39509	1.2076	1.60468	0.426809	0.372907	0.347619			607	0.49326	0.410251	0.433465	0.378238	0.380706	0.377871	1.07465	0.89581	1.0301	0.454782	0.424738	0.34233			214	0.0599	0.0752	0.055	0.1388	0.1093	0.0944	0.1576	0.1185	0.1686	0.1399	0.1142	0.1423			214	0.0474	0.0348	0.0228	0.0855
607.2	0.440505	0.441591	0.488488	0.395227	0.38909	0.389833	1.38202	1.19595	1.58976	0.424418	0.371008	0.346059			607.2	0.490299	0.40781	0.430944	0.376087	0.37856	0.375644	1.06522	0.887904	1.02109	0.452004	0.42244	0.340979			214.4	0.0589	0.0751	0.0562	0.1381	0.1097	0.0948	0.1569	0.1176	0.169	0.1395	0.1129	0.1416			214.4	0.0488	0.0348	0.022	0.0857
607.4	0.438384	0.439537	0.486048	0.393461	0.387303	0.387975	1.37186	1.18661	1.57799	0.42246	0.369386	0.34452			607.4	0.487948	0.405939	0.428907	0.374343	0.376879	0.373767	1.05754	0.88139	1.01411	0.450013	0.420486	0.339394			214.8	0.0599	0.0749	0.0554	0.138	0.1115	0.0947	0.1568	0.1182	0.1684	0.1399	0.1143	0.1427			214.8	0.0486	0.0346	0.0218	0.0861
607.6	0.435704	0.436758	0.483078	0.391356	0.385097	0.385805	1.35919	1.17521	1.56266	0.419802	0.366937	0.342956			607.6	0.485058	0.403813	0.426437	0.372148	0.374667	0.371454	1.04799	0.873138	1.00482	0.447127	0.417857	0.338008			215.2	0.0594	0.0746	0.0554	0.1376	0.1094	0.0947	0.1564	0.1172	0.1692	0.1404	0.1143	0.1423			215.2	0.0496	0.0343	0.0221	0.0873
607.8	0.433439	0.434677	0.480744	0.389733	0.383323	0.384065	1.34919	1.16629	1.55068	0.417784	0.364993	0.341446			607.8	0.482593	0.402028	0.424413	0.370379	0.372931	0.369675	1.04027	0.866656	0.997758	0.444897	0.415963	0.336576			215.6	0.0607	0.075	0.0552	0.1386	0.1098	0.0949	0.1574	0.1177	0.1703	0.1408	0.1148	0.1422			215.6	0.0482	0.0347	0.0221	0.0861
608	0.430235	0.431492	0.477264	0.387359	0.380675	0.381659	1.33355	1.15318	1.53222	0.414854	0.362136	0.339863			608	0.478837	0.399157	0.421415	0.367691	0.370305	0.367049	1.02867	0.857531	0.987154	0.441696	0.412673	0.334716			216	0.0603	0.076	0.0553	0.1379	0.1095	0.0952	0.1567	0.1188	0.1691	0.1403	0.1148	0.1418			216	0.0491	0.0343	0.022	0.0869
608.2	0.428627	0.429786	0.475344	0.385982	0.379339	0.380403	1.32607	1.14633	1.52294	0.413391	0.360413	0.339195			608.2	0.477119	0.397657	0.41984	0.366419	0.368912	0.365856	1.02299	0.853081	0.98146	0.440218	0.410893	0.333639			216.4	0.0595	0.0753	0.055	0.1394	0.1096	0.0953	0.1582	0.1183	0.1689	0.1389	0.1135	0.1425			216.4	0.049	0.0349	0.0216	0.0865
608.4	0.425223	0.426711	0.471908	0.383351	0.376772	0.377826	1.31107	1.13265	1.50456	0.410408	0.35758	0.337384			608.4	0.473696	0.394824	0.416834	0.363886	0.366468	0.363168	1.01155	0.843578	0.969988	0.436763	0.407612	0.33191			216.8	0.0606	0.0765	0.0561	0.1385	0.1109	0.0956	0.1573	0.1187	0.1696	0.1399	0.1137	0.1414			216.8	0.0491	0.0353	0.0216	0.0866
608.6	0.422522	0.424	0.469061	0.381155	0.374726	0.375581	1.29858	1.12174	1.48986	0.407897	0.355421	0.335776			608.6	0.470909	0.392534	0.414282	0.361718	0.364373	0.361007	1.0024	0.835933	0.96037	0.434267	0.404975	0.330329			217.2	0.0602	0.0754	0.0559	0.1373	0.111	0.0957	0.1561	0.1183	0.1689	0.1388	0.1137	0.1416			217.2	0.0483	0.035	0.0217	0.0867
608.8	0.420326	0.421907	0.466758	0.379403	0.373064	0.373833	1.2887	1.11287	1.47835	0.40581	0.353718	0.334575			608.8	0.46864	0.390785	0.412341	0.359907	0.362612	0.359334	0.994823	0.829874	0.95294	0.432401	0.403029	0.329064			217.6	0.0602	0.0766	0.0557	0.1379	0.1103	0.0951	0.1567	0.1176	0.1687	0.1397	0.1144	0.1428			217.6	0.0488	0.0349	0.0218	0.0875
609	0.417136	0.418843	0.463153	0.376792	0.370489	0.371313	1.27377	1.1002	1.46186	0.403035	0.351349	0.332944			609	0.46508	0.388076	0.409316	0.357404	0.360062	0.356765	0.983749	0.820959	0.943241	0.429813	0.399862	0.327165			218	0.0605	0.0759	0.0557	0.137	0.1115	0.095	0.1558	0.1187	0.1678	0.141	0.1146	0.1427			218	0.0488	0.0349	0.022	0.0861
609.2	0.415584	0.417202	0.46145	0.375536	0.369235	0.370189	1.26663	1.09385	1.45329	0.401553	0.350251	0.331818			609.2	0.463362	0.386638	0.407835	0.356156	0.358749	0.355617	0.978497	0.816516	0.938433	0.427995	0.39845	0.326			218.4	0.0599	0.0766	0.0558	0.138	0.1103	0.0963	0.1568	0.1188	0.1689	0.1413	0.1147	0.142			218.4	0.049	0.0348	0.0225	0.0864
609.4	0.412556	0.413873	0.457799	0.372903	0.366652	0.367572	1.25181	1.08122	1.43625	0.398583	0.347388	0.329548			609.4	0.4597	0.383918	0.404912	0.35372	0.356149	0.353194	0.966622	0.807854	0.927744	0.424699	0.395386	0.324426			218.8	0.0604	0.0765	0.0558	0.1377	0.1098	0.0963	0.1565	0.1174	0.1692	0.1401	0.114	0.1418			218.8	0.0482	0.0353	0.0222	0.087
609.6	0.410079	0.411164	0.455155	0.37079	0.364556	0.365538	1.23952	1.07051	1.42195	0.396225	0.345109	0.327648			609.6	0.456926	0.381533	0.40247	0.351603	0.354078	0.351085	0.957061	0.800179	0.918676	0.422149	0.392786	0.322687			219.2	0.0603	0.0762	0.0561	0.1381	0.1112	0.0959	0.1569	0.118	0.1692	0.1395	0.1139	0.142			219.2	0.0495	0.0355	0.0226	0.087
609.8	0.408166	0.409174	0.453082	0.369055	0.362816	0.363805	1.22975	1.06188	1.41054	0.394222	0.343232	0.326462			609.8	0.454769	0.379611	0.400528	0.349926	0.352487	0.349369	0.949664	0.794099	0.911968	0.420122	0.390791	0.321461			219.6	0.0599	0.0766	0.0564	0.1377	0.1107	0.0955	0.1565	0.1173	0.1693	0.1393	0.1144	0.1416			219.6	0.0484	0.0356	0.0221	0.0863
610	0.405043	0.40604	0.449676	0.366471	0.360356	0.361199	1.21511	1.04932	1.39382	0.391032	0.340808	0.324943			610	0.451269	0.376835	0.397529	0.347345	0.350126	0.346822	0.939307	0.785551	0.902288	0.416509	0.387802	0.319676			220	0.0611	0.0767	0.056	0.1376	0.1109	0.0956	0.1564	0.1185	0.1688	0.1399	0.1142	0.1423			220	0.0489	0.0352	0.0216	0.087
610.2	0.403504	0.404395	0.44808	0.365201	0.359111	0.359822	1.208	1.04313	1.38542	0.38948	0.339374	0.324012			610.2	0.449642	0.375604	0.39597	0.346183	0.348943	0.345578	0.934173	0.781193	0.897373	0.414596	0.385869	0.318738			220.4	0.0611	0.0763	0.0569	0.1377	0.1112	0.0961	0.1565	0.118	0.1689	0.1389	0.1143	0.1422			220.4	0.049	0.0352	0.0224	0.0868
610.4	0.400482	0.401242	0.44486	0.362684	0.356753	0.357286	1.19395	1.03052	1.36876	0.386418	0.336796	0.322053			610.4	0.446383	0.372892	0.393141	0.343667	0.346602	0.343147	0.923332	0.772194	0.886869	0.411369	0.382991	0.316111			220.8	0.0593	0.0767	0.0563	0.1375	0.111	0.0963	0.1563	0.1177	0.1692	0.1403	0.1142	0.1422			220.8	0.0495	0.0344	0.0222	0.0869
610.6	0.397991	0.398778	0.442186	0.360514	0.354575	0.355184	1.18232	1.02079	1.35499	0.383967	0.334262	0.320406			610.6	0.443719	0.370475	0.390782	0.341515	0.344534	0.341191	0.914616	0.765365	0.878127	0.408852	0.380262	0.314467			221.2	0.0601	0.0775	0.0571	0.1378	0.1103	0.0967	0.1566	0.1182	0.1695	0.14	0.1136	0.1428			221.2	0.0489	0.0351	0.0226	0.0876
610.8	0.395933	0.396783	0.440055	0.358736	0.352928	0.353505	1.1727	1.01303	1.34425	0.381904	0.332453	0.319224			610.8	0.44149	0.368624	0.388978	0.339856	0.342928	0.339478	0.907478	0.759812	0.871685	0.406761	0.378198	0.313088			221.6	0.0606	0.0765	0.0569	0.1384	0.11	0.0967	0.1572	0.1179	0.1694	0.1406	0.1147	0.1423			221.6	0.05	0.0361	0.022	0.0869
611	0.393079	0.393692	0.436683	0.356098	0.35045	0.351007	1.15879	1.00102	1.32866	0.379144	0.329927	0.317566			611	0.438149	0.365857	0.386275	0.337504	0.340412	0.337154	0.897088	0.751519	0.862525	0.403709	0.374847	0.31137			222	0.0609	0.0779	0.0562	0.139	0.1115	0.0973	0.1578	0.1179	0.1698	0.1391	0.1138	0.1422			222	0.0498	0.0347	0.0222	0.0868
611.2	0.391615	0.392243	0.435031	0.354843	0.349103	0.349631	1.15177	0.994752	1.32093	0.377742	0.328971	0.316815			611.2	0.43674	0.364464	0.384762	0.336399	0.339234	0.335885	0.891627	0.747198	0.857706	0.401699	0.37368	0.31059			222.4	0.0615	0.0773	0.0568	0.1376	0.1111	0.0971	0.1564	0.1182	0.1702	0.1403	0.1157	0.1427			222.4	0.0491	0.036	0.0225	0.0873
611.4	0.388646	0.389452	0.43184	0.352217	0.346661	0.346907	1.13831	0.982914	1.3049	0.375066	0.326849	0.314403			611.4	0.433633	0.361861	0.381842	0.334121	0.336861	0.333353	0.881808	0.738734	0.847248	0.398638	0.370712	0.308046			222.8	0.0612	0.0774	0.0572	0.1376	0.1109	0.0974	0.1564	0.1182	0.1693	0.1395	0.1146	0.1421			222.8	0.0495	0.0353	0.0226	0.087
611.6	0.386256	0.386876	0.429047	0.350103	0.344602	0.344783	1.12689	0.97329	1.29277	0.37278	0.32486	0.312795			611.6	0.430952	0.359635	0.379495	0.332183	0.334843	0.331294	0.873426	0.732198	0.839711	0.396246	0.368326	0.306368			223.2	0.0614	0.0777	0.0567	0.1383	0.1117	0.0974	0.1571	0.1183	0.1691	0.1401	0.1147	0.142			223.2	0.0497	0.0355	0.0225	0.0873
611.8	0.384317	0.384889	0.426843	0.348423	0.342914	0.343198	1.11766	0.965723	1.28302	0.371049	0.32324	0.31143			611.8	0.428688	0.35785	0.377555	0.330657	0.333171	0.329636	0.866688	0.726862	0.833603	0.394247	0.366464	0.304831			223.6	0.0608	0.0767	0.0569	0.1385	0.1113	0.0975	0.1573	0.1188	0.1696	0.1403	0.1146	0.1428			223.6	0.0497	0.0357	0.0223	0.0867
612	0.381458	0.381926	0.423611	0.345888	0.34038	0.3407	1.10429	0.95444	1.26765	0.368678	0.320737	0.30954			612	0.425566	0.355231	0.374679	0.328406	0.330779	0.327208	0.856772	0.718518	0.82426	0.391205	0.363323	0.302716			224	0.0611	0.0778	0.0576	0.1387	0.1113	0.0973	0.1575	0.1184	0.1703	0.1394	0.1137	0.1426			224	0.0498	0.0356	0.0225	0.0876
612.2	0.380059	0.38037	0.422042	0.344673	0.339248	0.339431	1.09777	0.948774	1.25977	0.367203	0.319337	0.308499			612.2	0.424043	0.353961	0.373469	0.327255	0.329552	0.32593	0.851854	0.714555	0.819527	0.389387	0.361789	0.302122			224.4	0.0613	0.0769	0.0569	0.1379	0.1104	0.0963	0.1567	0.118	0.1694	0.1399	0.1144	0.1427			224.4	0.051	0.0361	0.0232	0.0875
612.4	0.377233	0.377462	0.418844	0.342195	0.3368	0.336971	1.08486	0.937631	1.24422	0.364476	0.316822	0.30654			612.4	0.420965	0.351282	0.370773	0.324946	0.327303	0.323572	0.842362	0.706177	0.809861	0.386495	0.359053	0.300179			224.8	0.0618	0.0785	0.0573	0.1386	0.112	0.0975	0.1574	0.1173	0.1688	0.1394	0.1145	0.1419			224.8	0.0501	0.0358	0.0227	0.0877
612.6	0.374839	0.375173	0.416113	0.340336	0.334863	0.334991	1.07393	0.928357	1.23191	0.362195	0.314837	0.304937			612.6	0.418555	0.349169	0.368441	0.323126	0.32535	0.321715	0.834676	0.699334	0.802397	0.384141	0.356775	0.298157			225.2	0.0621	0.0784	0.0569	0.1381	0.1114	0.098	0.1569	0.1184	0.1686	0.1388	0.114	0.1419			225.2	0.0496	0.0355	0.0233	0.0882
612.8	0.372941	0.373314	0.41393	0.338801	0.333206	0.333345	1.06545	0.921067	1.22223	0.36037	0.313456	0.303659			612.8	0.416545	0.347491	0.366488	0.321611	0.323825	0.320299	0.828868	0.694142	0.796478	0.382064	0.355099	0.296509			225.6	0.062	0.0778	0.0583	0.1377	0.1116	0.0979	0.1565	0.1177	0.1698	0.1392	0.1144	0.1419			225.6	0.0493	0.0364	0.0223	0.0873
613	0.369991	0.370395	0.410766	0.336342	0.330996	0.331056	1.05317	0.910103	1.2079	0.357811	0.311407	0.301582			613	0.413474	0.344972	0.363808	0.319356	0.321296	0.318094	0.820069	0.686508	0.787596	0.378839	0.352518	0.294722			226	0.0621	0.0782	0.0574	0.1399	0.1118	0.0976	0.1587	0.1173	0.1697	0.1398	0.1136	0.1431			226	0.0497	0.0353	0.0227	0.0874
613.2	0.36869	0.368813	0.409171	0.335132	0.32983	0.329908	1.04694	0.904938	1.2004	0.35636	0.310147	0.300294			613.2	0.411946	0.343681	0.362511	0.318276	0.320154	0.317003	0.815389	0.682573	0.782529	0.377442	0.350926	0.29361			226.4	0.0615	0.0779	0.058	0.1385	0.1112	0.0974	0.1573	0.1172	0.1697	0.1394	0.1148	0.1427			226.4	0.0502	0.036	0.0234	0.0871
613.4	0.36574	0.366129	0.40588	0.332771	0.32752	0.327421	1.03494	0.894606	1.18645	0.353665	0.307696	0.298916			613.4	0.408841	0.341067	0.359822	0.315918	0.318071	0.314795	0.805891	0.67478	0.773148	0.37464	0.348535	0.292027			226.8	0.0615	0.079	0.0579	0.1377	0.1114	0.0975	0.1565	0.118	0.169	0.1392	0.1147	0.1428			226.8	0.0506	0.0359	0.0225	0.0875
613.6	0.364302	0.364678	0.404229	0.331603	0.326257	0.326301	1.02866	0.889568	1.17942	0.352406	0.306512	0.298124			613.6	0.407376	0.339936	0.358241	0.314882	0.31685	0.313721	0.801079	0.671341	0.768835	0.373354	0.347162	0.291381			227.2	0.0612	0.0784	0.058	0.1387	0.1116	0.0987	0.1575	0.1182	0.1691	0.1394	0.1139	0.1412			227.2	0.0499	0.0361	0.0232	0.088
613.8	0.361418	0.361822	0.40126	0.329238	0.323813	0.324018	1.01638	0.879242	1.16524	0.349732	0.304229	0.296085			613.8	0.404344	0.33744	0.355882	0.312738	0.314526	0.311403	0.791947	0.663638	0.759729	0.370529	0.344491	0.289324			227.6	0.0624	0.0781	0.0579	0.1379	0.1118	0.0987	0.1567	0.1182	0.1688	0.1412	0.1152	0.1424			227.6	0.0498	0.0365	0.0229	0.0884
614	0.359748	0.359964	0.399276	0.327712	0.322315	0.322512	1.00858	0.872291	1.1559	0.348127	0.302893	0.294406			614	0.402327	0.335795	0.35405	0.311244	0.313024	0.309862	0.786175	0.658637	0.753962	0.36863	0.342631	0.287616			228	0.0625	0.0792	0.058	0.1378	0.1122	0.0985	0.1566	0.1175	0.1703	0.1402	0.1135	0.1424			228	0.0502	0.0356	0.0238	0.0874
614.2	0.357515	0.357745	0.39681	0.32584	0.320381	0.320588	0.998292	0.863659	1.14462	0.346096	0.301145	0.292703			614.2	0.399943	0.333718	0.351723	0.309418	0.311331	0.308036	0.778891	0.652741	0.746852	0.366191	0.340271	0.285877			228.4	0.0617	0.0786	0.0585	0.1386	0.1114	0.0987	0.1574	0.1171	0.1693	0.141	0.1137	0.1419			228.4	0.051	0.0355	0.0229	0.0885
614.4	0.354675	0.355111	0.393617	0.323526	0.318117	0.318222	0.986829	0.853837	1.13072	0.343601	0.298403	0.290948			614.4	0.396862	0.331243	0.34915	0.307132	0.309068	0.305827	0.770418	0.645682	0.737899	0.363726	0.337198	0.283876			228.8	0.062	0.0787	0.0579	0.139	0.1113	0.0985	0.1578	0.1174	0.1698	0.1404	0.1143	0.1421			228.8	0.0507	0.0355	0.024	0.0881
614.6	0.353326	0.353738	0.392051	0.322459	0.31705	0.317088	0.981	0.848686	1.12412	0.342144	0.297304	0.289957			614.6	0.395443	0.329924	0.347863	0.305944	0.308061	0.304716	0.765783	0.641979	0.733876	0.362526	0.335842	0.282962			229.2	0.0627	0.0792	0.0578	0.1383	0.1118	0.0982	0.1571	0.1177	0.1701	0.1398	0.1144	0.143			229.2	0.0509	0.037	0.023	0.0893
614.8	0.350545	0.351122	0.389188	0.320107	0.314827	0.31476	0.969657	0.838661	1.11086	0.339307	0.295183	0.288231			614.8	0.39248	0.327516	0.34529	0.303611	0.3057	0.302457	0.757109	0.634787	0.725779	0.359731	0.333534	0.280845			229.6	0.0629	0.0796	0.0583	0.139	0.1115	0.0987	0.1578	0.119	0.1694	0.1393	0.1151	0.1427			229.6	0.0507	0.0365	0.0225	0.0892
615	0.34875	0.349386	0.387303	0.318602	0.313308	0.313192	0.961995	0.832193	1.10187	0.337562	0.294049	0.287061			615	0.390596	0.325898	0.343626	0.30214	0.304192	0.301034	0.751361	0.630232	0.720419	0.357727	0.332002	0.279779			230	0.0634	0.0787	0.0583	0.138	0.112	0.0996	0.1568	0.1176	0.1697	0.1405	0.1139	0.1427			230	0.0503	0.036	0.0232	0.0894
615.2	0.346561	0.347245	0.384872	0.316688	0.311431	0.311208	0.952332	0.824288	1.09091	0.335316	0.292363	0.285694			615.2	0.388251	0.323877	0.341514	0.300346	0.302256	0.299246	0.744295	0.624608	0.713522	0.355152	0.32998	0.278409			230.4	0.0625	0.0789	0.0585	0.1389	0.1117	0.0985	0.1577	0.1174	0.1696	0.1395	0.1144	0.1422			230.4	0.0498	0.0373	0.0242	0.0885
615.4	0.344073	0.34475	0.381834	0.314443	0.309162	0.309106	0.941488	0.815063	1.07782	0.33316	0.290152	0.283557			615.4	0.385441	0.321509	0.338841	0.298102	0.300076	0.297195	0.735967	0.617603	0.705365	0.352473	0.327603	0.276172			230.8	0.0628	0.0788	0.0582	0.1384	0.111	0.0991	0.1572	0.117	0.1689	0.1403	0.1137	0.1415			230.8	0.0504	0.036	0.0229	0.0886
615.6	0.342778	0.343428	0.380478	0.313366	0.308058	0.307912	0.935768	0.810417	1.07148	0.331875	0.289008	0.282814			615.6	0.383924	0.320416	0.337549	0.296915	0.299011	0.295997	0.731595	0.614054	0.701207	0.350978	0.326367	0.27528			231.2	0.0631	0.0796	0.058	0.1389	0.1122	0.0994	0.1577	0.1177	0.1702	0.1393	0.1144	0.1433			231.2	0.0497	0.0368	0.0236	0.0889
615.8	0.34017	0.340765	0.377609	0.310819	0.305671	0.305594	0.924912	0.801175	1.05886	0.329291	0.286757	0.280692			615.8	0.38094	0.317944	0.334912	0.294624	0.296914	0.293677	0.723771	0.607156	0.693106	0.348135	0.323799	0.273386			231.6	0.0627	0.079	0.0587	0.1386	0.1119	0.0991	0.1574	0.1177	0.1696	0.1401	0.1143	0.142			231.6	0.0507	0.0364	0.0227	0.0893
616	0.338343	0.339029	0.37593	0.309245	0.304267	0.304188	0.917741	0.794855	1.0502	0.327652	0.285263	0.279653			616	0.378887	0.316265	0.333287	0.293123	0.295509	0.292138	0.7184	0.602472	0.688089	0.346308	0.321894	0.272054			232	0.0633	0.0797	0.0586	0.1389	0.1121	0.1001	0.1577	0.1182	0.1691	0.1396	0.1137	0.1423			232	0.0508	0.0363	0.0237	0.0886
616.2	0.33615	0.336973	0.373644	0.307362	0.302421	0.30226	0.908698	0.787214	1.03948	0.325545	0.283556	0.278435			616.2	0.376463	0.314396	0.331176	0.291226	0.293677	0.290255	0.711524	0.596861	0.681754	0.343968	0.31969	0.270426			232.4	0.063	0.0798	0.0592	0.1381	0.1125	0.1003	0.1569	0.1184	0.1704	0.1392	0.1148	0.1417			232.4	0.0496	0.0368	0.0236	0.0882
616.4	0.333593	0.334465	0.370649	0.305259	0.300183	0.300017	0.898306	0.777921	1.02772	0.322985	0.281463	0.276788			616.4	0.373679	0.312023	0.328677	0.289143	0.291487	0.288055	0.703483	0.590053	0.674263	0.34153	0.317304	0.26869			232.8	0.0633	0.08	0.0585	0.1379	0.1112	0.0996	0.1567	0.1177	0.17	0.1406	0.114	0.1422			232.8	0.051	0.036	0.0231	0.0889
616.6	0.332295	0.333123	0.36929	0.304203	0.299097	0.298932	0.892939	0.773248	1.02178	0.321847	0.280367	0.275914			616.6	0.372276	0.310916	0.327502	0.288073	0.290415	0.286988	0.699728	0.586992	0.670681	0.340167	0.316152	0.267557			233.2	0.0633	0.0795	0.0596	0.1376	0.1125	0.0994	0.1564	0.1176	0.1695	0.1411	0.1136	0.1426			233.2	0.0504	0.0368	0.023	0.0891
616.8	0.329838	0.330682	0.366454	0.302076	0.296922	0.296571	0.882868	0.76418	1.00954	0.319412	0.278167	0.274267			616.8	0.369457	0.308649	0.325096	0.285827	0.288273	0.284771	0.691926	0.580237	0.663074	0.337333	0.313653	0.265521			233.6	0.0629	0.0798	0.0585	0.1383	0.1126	0.1003	0.1571	0.1173	0.1686	0.14	0.1139	0.1425			233.6	0.0512	0.0371	0.0232	0.0897
617	0.328212	0.329075	0.364538	0.30058	0.295496	0.295062	0.876198	0.758165	1.00149	0.317821	0.276786	0.273147			617	0.367569	0.307074	0.323338	0.284336	0.286845	0.283381	0.686956	0.575998	0.658374	0.335571	0.311859	0.264421			234	0.0631	0.0804	0.0592	0.1386	0.1117	0.1	0.1574	0.1184	0.169	0.1396	0.1151	0.1434			234	0.0518	0.0374	0.0239	0.0889
617.2	0.326033	0.327037	0.362036	0.298714	0.293643	0.293203	0.867899	0.750686	0.991566	0.315684	0.274937	0.271747			617.2	0.365175	0.305106	0.321276	0.282397	0.285126	0.281527	0.680597	0.570784	0.652584	0.33306	0.309634	0.263123			234.4	0.0637	0.0796	0.0598	0.1378	0.1114	0.1009	0.1566	0.1182	0.1701	0.1399	0.1142	0.1424			234.4	0.0513	0.0369	0.0236	0.0895
617.4	0.323564	0.324545	0.35919	0.296474	0.291282	0.290999	0.858606	0.742159	0.980026	0.313243	0.272658	0.270089			617.4	0.362434	0.302876	0.318879	0.280311	0.282915	0.279555	0.673279	0.563989	0.645416	0.330823	0.307467	0.261443			234.8	0.0634	0.0798	0.0594	0.1387	0.1131	0.1006	0.1575	0.1184	0.1701	0.1383	0.1142	0.1421			234.8	0.0517	0.0366	0.0234	0.0879
617.6	0.322352	0.323256	0.357905	0.295437	0.290291	0.289894	0.853781	0.737914	0.974331	0.312037	0.271672	0.269085			617.6	0.361096	0.30184	0.317603	0.279324	0.28183	0.278437	0.669862	0.560682	0.641931	0.329553	0.306175	0.260549			235.2	0.0635	0.0793	0.0594	0.1374	0.1118	0.1009	0.1562	0.118	0.1699	0.1387	0.1143	0.1413			235.2	0.0517	0.0372	0.0235	0.0891
617.8	0.319894	0.320672	0.35528	0.29324	0.288102	0.287871	0.844073	0.729951	0.963359	0.309777	0.26971	0.267036			617.8	0.358377	0.299431	0.315193	0.277199	0.279698	0.276391	0.662567	0.554555	0.634939	0.326844	0.30407	0.258392			235.6	0.0623	0.0815	0.0598	0.1377	0.1128	0.1004	0.1565	0.1183	0.1702	0.1403	0.1145	0.1421			235.6	0.0505	0.0366	0.0238	0.0903
618	0.318165	0.31897	0.35343	0.291798	0.286697	0.286518	0.837474	0.724677	0.955829	0.308205	0.268211	0.265946			618	0.356578	0.297908	0.313573	0.275868	0.278354	0.275035	0.657664	0.550572	0.630164	0.325146	0.302253	0.257466			236	0.0639	0.081	0.0604	0.1383	0.1128	0.1001	0.1571	0.1175	0.1696	0.1396	0.1133	0.1422			236	0.0513	0.0373	0.0242	0.0902
618.2	0.31608	0.316853	0.351202	0.289975	0.284954	0.28477	0.829817	0.718153	0.946479	0.306417	0.266181	0.26454			618.2	0.354361	0.29594	0.311542	0.27424	0.276693	0.273411	0.651681	0.545562	0.624187	0.322909	0.30003	0.256043			236.4	0.0637	0.0815	0.0597	0.1385	0.1133	0.1007	0.1573	0.1179	0.1693	0.1394	0.1147	0.1427			236.4	0.0517	0.0373	0.0238	0.09
618.4	0.313733	0.314363	0.348343	0.28786	0.28284	0.282655	0.820655	0.709878	0.935393	0.303896	0.264074	0.262903			618.4	0.351614	0.293395	0.309343	0.272224	0.274858	0.271316	0.644423	0.539435	0.617397	0.320772	0.297784	0.254098			236.8	0.0635	0.0812	0.0597	0.1381	0.1118	0.101	0.1569	0.1184	0.1703	0.1399	0.1147	0.1423			236.8	0.0516	0.0375	0.023	0.0897
618.6	0.312481	0.313149	0.347007	0.286754	0.281775	0.281506	0.815903	0.705759	0.930723	0.302549	0.262997	0.261926			618.6	0.350145	0.292146	0.308208	0.271253	0.273819	0.270292	0.641231	0.536339	0.613952	0.319391	0.296602	0.252984			237.2	0.0638	0.0808	0.0603	0.1386	0.1127	0.1023	0.1574	0.1177	0.1699	0.1401	0.1145	0.1417			237.2	0.051	0.0378	0.0234	0.0895
618.8	0.309969	0.310721	0.344244	0.2848	0.279617	0.279306	0.806803	0.697777	0.920276	0.300064	0.260895	0.260142			618.8	0.347514	0.289842	0.305766	0.269295	0.271461	0.2682	0.6341	0.530621	0.60726	0.316919	0.293999	0.251394			237.6	0.0643	0.081	0.0595	0.1382	0.1122	0.1017	0.157	0.1182	0.1699	0.1389	0.1137	0.1418			237.6	0.0515	0.0371	0.0232	0.0903
619	0.308351	0.30912	0.342441	0.283377	0.278279	0.277902	0.800929	0.69248	0.913198	0.298548	0.2596	0.259333			619	0.345773	0.288376	0.304299	0.267894	0.27007	0.266874	0.6294	0.526992	0.603014	0.315094	0.292482	0.250233			238	0.0637	0.0812	0.0591	0.1386	0.1128	0.101	0.1574	0.118	0.1696	0.1394	0.1138	0.1425			238	0.0509	0.0377	0.024	0.0904
619.2	0.30631	0.307152	0.340103	0.281568	0.276554	0.276136	0.793454	0.686154	0.904477	0.296657	0.258021	0.257568			619.2	0.343567	0.286549	0.302438	0.26625	0.268291	0.265305	0.623526	0.522562	0.597663	0.313054	0.290736	0.248819			238.4	0.0634	0.0814	0.0597	0.1383	0.1116	0.1007	0.1571	0.1181	0.1695	0.1392	0.1146	0.1419			238.4	0.0516	0.0377	0.0248	0.0895
619.4	0.303956	0.304684	0.337156	0.27942	0.274394	0.274093	0.78506	0.678338	0.89427	0.294243	0.255989	0.255887			619.4	0.341055	0.28441	0.300315	0.264427	0.266325	0.263323	0.616993	0.517095	0.590755	0.310781	0.288401	0.24695			238.8	0.064	0.0815	0.0596	0.1384	0.1128	0.1009	0.1572	0.1183	0.1702	0.1395	0.1145	0.1429			238.8	0.0517	0.0382	0.0235	0.089
619.6	0.302781	0.303463	0.335971	0.278451	0.273388	0.273069	0.780892	0.674609	0.888912	0.293215	0.254931	0.254856			619.6	0.339729	0.283269	0.299216	0.263414	0.265337	0.26239	0.613794	0.514518	0.587526	0.309657	0.287165	0.245945			239.2	0.065	0.0817	0.0604	0.1392	0.1128	0.1009	0.158	0.1185	0.1695	0.1395	0.1145	0.142			239.2	0.0518	0.038	0.0246	0.0897
619.8	0.300492	0.301063	0.333323	0.276215	0.271195	0.270981	0.772209	0.667192	0.878463	0.291103	0.252881	0.253128			619.8	0.337172	0.281018	0.296926	0.261397	0.263391	0.260481	0.607254	0.508916	0.581365	0.307381	0.284805	0.244251			239.6	0.0645	0.0812	0.0603	0.1378	0.1128	0.102	0.1566	0.1179	0.1692	0.1402	0.113	0.1429			239.6	0.0511	0.0377	0.0236	0.0899
620	0.298944	0.299411	0.331629	0.274774	0.26983	0.269588	0.766299	0.662509	0.872055	0.289627	0.251392	0.251832			620	0.335458	0.279569	0.295381	0.260198	0.262001	0.259078	0.603009	0.505588	0.577328	0.305776	0.28329	0.243204			240	0.0648	0.0815	0.0606	0.1387	0.1124	0.1017	0.1575	0.1188	0.1695	0.1393	0.1133	0.1426			240	0.0511	0.0373	0.0237	0.0898
620.2	0.29695	0.297417	0.329471	0.272978	0.268133	0.267878	0.758891	0.656578	0.864086	0.28772	0.249379	0.250554			620.2	0.333385	0.277759	0.293461	0.258631	0.260367	0.257293	0.597571	0.501539	0.571977	0.303624	0.281211	0.242055			240.4	0.0641	0.0815	0.0601	0.1379	0.1124	0.1019	0.1567	0.1169	0.1692	0.1402	0.1135	0.1421			240.4	0.0519	0.0377	0.0254	0.09
620.4	0.294452	0.295141	0.326931	0.271052	0.266021	0.265853	0.750646	0.649704	0.854372	0.28576	0.247185	0.248745			620.4	0.33072	0.275653	0.29094	0.256783	0.258225	0.255479	0.591355	0.496175	0.565728	0.301475	0.279029	0.240121			240.8	0.0638	0.0821	0.0595	0.1389	0.1132	0.1015	0.1577	0.1178	0.1696	0.1393	0.1151	0.1429			240.8	0.0522	0.0377	0.0243	0.0916
620.6	0.293274	0.293931	0.325555	0.269973	0.265111	0.264861	0.746352	0.646306	0.84955	0.284685	0.246353	0.247782			620.6	0.329443	0.27462	0.289877	0.255778	0.257204	0.254422	0.58771	0.493817	0.562634	0.300153	0.277944	0.239292			241.2	0.0643	0.0823	0.0605	0.1388	0.1131	0.1025	0.1576	0.1174	0.1702	0.1404	0.1142	0.1423			241.2	0.0519	0.0376	0.0243	0.0898
620.8	0.290847	0.291616	0.322912	0.267845	0.263045	0.26282	0.738149	0.639037	0.840611	0.28259	0.24442	0.246421			620.8	0.326847	0.272419	0.287692	0.253759	0.255238	0.252387	0.5814	0.488955	0.556392	0.29756	0.275536	0.237658			241.6	0.0643	0.0827	0.06	0.1379	0.112	0.1028	0.1567	0.118	0.1694	0.1407	0.1145	0.1426			241.6	0.052	0.0386	0.024	0.0908
621	0.2894	0.289996	0.321109	0.266438	0.26167	0.261423	0.732813	0.634489	0.8345	0.281047	0.242991	0.245185			621	0.325133	0.271088	0.286174	0.252468	0.253902	0.250989	0.577319	0.485767	0.552698	0.296089	0.273848	0.236644			242	0.0644	0.0817	0.0602	0.1378	0.1133	0.1023	0.1566	0.1175	0.1704	0.1395	0.1143	0.1421			242	0.0517	0.0382	0.0246	0.0902
621.2	0.287635	0.288128	0.318882	0.264778	0.260008	0.259691	0.726491	0.628772	0.826955	0.279259	0.241392	0.243706			621.2	0.322959	0.269357	0.284184	0.250876	0.252257	0.249433	0.572298	0.481712	0.548016	0.294239	0.271959	0.235151			242.4	0.0649	0.0819	0.0608	0.1379	0.1127	0.1025	0.1567	0.1182	0.1692	0.1399	0.1145	0.1431			242.4	0.0518	0.0387	0.0238	0.0908
621.4	0.285338	0.28573	0.31623	0.262835	0.258044	0.257642	0.718867	0.622002	0.818244	0.277075	0.239131	0.242038			621.4	0.320322	0.267372	0.282025	0.248882	0.250291	0.247398	0.566198	0.476981	0.542714	0.292067	0.269765	0.233475			242.8	0.064	0.0813	0.0613	0.1377	0.114	0.1018	0.1565	0.1178	0.1706	0.1392	0.1148	0.1424			242.8	0.0518	0.0381	0.0242	0.0899
621.6	0.283341	0.28391	0.314093	0.261196	0.256425	0.256017	0.712711	0.616511	0.810568	0.275262	0.237523	0.240669			621.6	0.318295	0.265768	0.280262	0.247235	0.248629	0.245812	0.56163	0.472915	0.537863	0.290119	0.267773	0.232087			243.2	0.0647	0.0827	0.0597	0.1383	0.1133	0.1022	0.1571	0.1175	0.1701	0.1404	0.1132	0.1424			243.2	0.0523	0.0373	0.024	0.0895
621.8	0.281734	0.282354	0.312451	0.259885	0.255151	0.254735	0.707955	0.612262	0.804308	0.273889	0.236237	0.239623			621.8	0.316677	0.264547	0.27874	0.245988	0.247347	0.24454	0.557851	0.469935	0.534051	0.288538	0.266242	0.231019			243.6	0.0652	0.0821	0.061	0.139	0.113	0.1028	0.1578	0.1188	0.1699	0.1406	0.1137	0.1425			243.6	0.0517	0.0388	0.0245	0.0905
622	0.279585	0.280151	0.310036	0.257795	0.253249	0.252608	0.700549	0.605588	0.796064	0.271635	0.234574	0.237387			622	0.314252	0.2623	0.276599	0.244187	0.245586	0.242738	0.552331	0.465388	0.529181	0.286256	0.264319	0.228667			244	0.0647	0.0827	0.0611	0.1397	0.113	0.1031	0.1585	0.1179	0.1702	0.1401	0.1143	0.1416			244	0.0513	0.0382	0.024	0.0904
622.2	0.278438	0.279041	0.308757	0.256909	0.252385	0.251642	0.697003	0.602475	0.791736	0.270598	0.233466	0.236563			622.2	0.312929	0.261234	0.275649	0.243315	0.24461	0.241805	0.549615	0.463103	0.526367	0.2853	0.263285	0.227829			244.4	0.0649	0.0828	0.061	0.1383	0.1138	0.1021	0.1571	0.1183	0.1689	0.1402	0.1139	0.1432			244.4	0.0513	0.0385	0.0247	0.0906
622.4	0.27641	0.276714	0.306217	0.255036	0.250483	0.249581	0.689853	0.596191	0.783919	0.268592	0.231531	0.234844			622.4	0.31048	0.259321	0.273444	0.241521	0.242699	0.239917	0.543977	0.458636	0.521414	0.28318	0.260869	0.226193			244.8	0.0651	0.0825	0.061	0.1388	0.1135	0.103	0.1576	0.1182	0.1694	0.1398	0.1149	0.1421			244.8	0.0517	0.038	0.0245	0.0905
622.6	0.27448	0.274889	0.304176	0.253336	0.248955	0.247987	0.683681	0.591281	0.777501	0.267013	0.229952	0.233449			622.6	0.308473	0.257608	0.271564	0.239882	0.241065	0.238393	0.539126	0.454682	0.517094	0.281254	0.259354	0.224893			245.2	0.0648	0.0821	0.0612	0.1377	0.1134	0.1028	0.1565	0.1182	0.17	0.1404	0.1136	0.1418			245.2	0.0522	0.0377	0.0248	0.0903
622.8	0.273033	0.273468	0.302525	0.251903	0.247743	0.246589	0.678845	0.587367	0.772499	0.265621	0.228536	0.232369			622.8	0.306822	0.256357	0.270038	0.238614	0.239784	0.237105	0.53531	0.451779	0.513883	0.279714	0.257865	0.224004			245.6	0.0644	0.0833	0.0609	0.1381	0.1134	0.1026	0.1569	0.1177	0.1698	0.1399	0.1149	0.1423			245.6	0.0531	0.0393	0.0235	0.0907
623	0.270685	0.271205	0.300208	0.250064	0.245869	0.244541	0.67216	0.581504	0.764732	0.26342	0.226528	0.230578			623	0.304239	0.254419	0.267881	0.236892	0.237798	0.235143	0.530157	0.447541	0.508539	0.27725	0.255803	0.222365			246	0.0649	0.0832	0.0617	0.1388	0.114	0.1034	0.1576	0.1178	0.1702	0.139	0.1131	0.1425			246	0.0519	0.038	0.0249	0.0907
623.2	0.269508	0.270084	0.298888	0.249216	0.244905	0.24362	0.668873	0.578458	0.760944	0.262372	0.225474	0.229746			623.2	0.302978	0.25339	0.266789	0.235924	0.23688	0.234143	0.52753	0.445175	0.505986	0.276295	0.254745	0.221311			246.4	0.0652	0.0829	0.0608	0.1386	0.1135	0.1033	0.1574	0.1184	0.1696	0.14	0.1141	0.1422			246.4	0.0527	0.0384	0.0243	0.0915
623.4	0.267243	0.267711	0.296545	0.247374	0.242939	0.241725	0.66218	0.572313	0.753258	0.26032	0.224134	0.228247			623.4	0.300499	0.251324	0.264759	0.23404	0.235144	0.232375	0.522567	0.440598	0.50113	0.274412	0.253035	0.219749			246.8	0.0657	0.0826	0.0612	0.1393	0.1134	0.1039	0.1581	0.1176	0.1691	0.1397	0.1137	0.1419			246.8	0.0528	0.0389	0.0243	0.0908
623.6	0.265521	0.265818	0.294485	0.245748	0.241423	0.240172	0.656697	0.567392	0.747012	0.258541	0.222701	0.226882			623.6	0.298485	0.249616	0.263007	0.232462	0.233624	0.230907	0.518344	0.436953	0.4971	0.272568	0.251173	0.218247			247.2	0.0659	0.0832	0.0617	0.1393	0.1139	0.1034	0.1581	0.1167	0.1703	0.1399	0.1134	0.1434			247.2	0.0531	0.0382	0.024	0.0914
623.8	0.264083	0.26443	0.292922	0.244601	0.240153	0.238921	0.65218	0.563541	0.742046	0.257191	0.221571	0.225826			623.8	0.296935	0.248323	0.261553	0.231312	0.232471	0.229715	0.514972	0.434234	0.493543	0.271069	0.249899	0.217116			247.6	0.0654	0.0839	0.0609	0.1387	0.1139	0.1041	0.1575	0.1178	0.1706	0.139	0.115	0.1428			247.6	0.0523	0.0388	0.0247	0.0909
624	0.26208	0.262153	0.2905	0.242672	0.238355	0.23712	0.645583	0.557925	0.734291	0.255093	0.219894	0.224286			624	0.294538	0.246348	0.259557	0.229478	0.230661	0.227909	0.51005	0.430029	0.488659	0.268946	0.24812	0.21551			248	0.066	0.0825	0.0611	0.1397	0.1137	0.1033	0.1585	0.1188	0.1696	0.1402	0.1142	0.1432			248	0.0526	0.0379	0.0251	0.0908
624.2	0.260842	0.261158	0.289314	0.241759	0.237508	0.236131	0.642395	0.555238	0.730852	0.254226	0.219091	0.223552			624.2	0.293349	0.245365	0.258542	0.228632	0.229748	0.227093	0.507714	0.427791	0.486345	0.26793	0.247285	0.214865			248.4	0.0641	0.0837	0.0613	0.139	0.114	0.1037	0.1578	0.1181	0.1706	0.1394	0.1148	0.1424			248.4	0.0521	0.0386	0.025	0.0916
624.4	0.258609	0.259067	0.287115	0.239953	0.235729	0.234202	0.635819	0.549736	0.72356	0.252114	0.217466	0.221714			624.4	0.290857	0.243336	0.256487	0.226735	0.228064	0.225254	0.502796	0.423419	0.481818	0.265618	0.245524	0.213105			248.8	0.0658	0.0838	0.0622	0.139	0.1143	0.1035	0.1578	0.1177	0.1696	0.1399	0.1136	0.1416			248.8	0.0526	0.0389	0.0241	0.0915
624.6	0.256848	0.257362	0.285156	0.238354	0.234115	0.232716	0.630678	0.545316	0.717442	0.250567	0.216159	0.220249			624.6	0.288863	0.241782	0.254604	0.22524	0.226584	0.22378	0.49897	0.419672	0.477937	0.264035	0.243912	0.211687			249.2	0.0658	0.0838	0.0618	0.1385	0.1144	0.1042	0.1573	0.1182	0.1704	0.1396	0.1149	0.1431			249.2	0.0529	0.039	0.024	0.092
624.8	0.255523	0.255969	0.283668	0.237135	0.232869	0.231508	0.626671	0.54196	0.71253	0.249348	0.215138	0.219108			624.8	0.287271	0.240528	0.253141	0.224045	0.22539	0.222593	0.496064	0.416956	0.474891	0.262631	0.242689	0.210612			249.6	0.0661	0.0846	0.0617	0.1402	0.1136	0.1038	0.159	0.1174	0.1706	0.1394	0.1138	0.143			249.6	0.0524	0.0397	0.025	0.0909
625	0.253394	0.253859	0.281321	0.23528	0.231033	0.229687	0.62046	0.536583	0.70575	0.247512	0.213582	0.217382			625	0.28478	0.238454	0.251029	0.222307	0.223561	0.220882	0.49133	0.413161	0.470272	0.260534	0.240947	0.209068			250	0.0659	0.0831	0.0615	0.1385	0.1135	0.1032	0.1573	0.1168	0.1709	0.1395	0.1143	0.1417			250	0.0525	0.0389	0.0252	0.0917
625.2	0.252301	0.252759	0.280109	0.234305	0.230108	0.228862	0.617637	0.534049	0.702317	0.246615	0.212561	0.216648			625.2	0.283606	0.237618	0.249945	0.221274	0.222675	0.219864	0.489168	0.411135	0.467983	0.25946	0.239988	0.208356			250.4	0.066	0.084	0.0631	0.1389	0.1138	0.1035	0.1577	0.1173	0.1707	0.1396	0.1151	0.1417			250.4	0.0528	0.0388	0.0246	0.0917
625.4	0.250241	0.250638	0.27775	0.232473	0.2282	0.227216	0.611756	0.529121	0.695531	0.244646	0.210823	0.214937			625.4	0.281278	0.235902	0.247855	0.2194	0.221014	0.218268	0.484654	0.407279	0.463222	0.25715	0.2381	0.206877			250.8	0.0661	0.0835	0.0619	0.1387	0.1142	0.1055	0.1575	0.1186	0.1696	0.139	0.1138	0.1417			250.8	0.0521	0.0391	0.0251	0.0921
625.6	0.248907	0.24936	0.276192	0.23126	0.226985	0.226087	0.607804	0.52572	0.690949	0.243333	0.209677	0.2138			625.6	0.279812	0.234573	0.24653	0.218178	0.219854	0.217093	0.481874	0.404694	0.459942	0.255692	0.236847	0.20576			251.2	0.0662	0.0845	0.0624	0.138	0.1137	0.1042	0.1568	0.1182	0.1698	0.1399	0.1139	0.1427			251.2	0.0537	0.0388	0.0244	0.092
625.8	0.247267	0.247755	0.274243	0.229655	0.225501	0.2246	0.603106	0.52143	0.685157	0.241674	0.208227	0.212422			625.8	0.277934	0.233029	0.244772	0.21669	0.218442	0.215654	0.478358	0.401669	0.455828	0.253815	0.235113	0.204402			251.6	0.0665	0.0841	0.0622	0.1385	0.1136	0.1056	0.1573	0.1178	0.1703	0.1407	0.1147	0.1426			251.6	0.053	0.0395	0.0251	0.0916
626	0.245173	0.245745	0.271973	0.227967	0.223733	0.222925	0.597127	0.516497	0.678278	0.239874	0.206632	0.210891			626	0.275691	0.231171	0.242865	0.215055	0.216752	0.213827	0.473811	0.397908	0.451701	0.251671	0.233137	0.202687			252	0.0671	0.0842	0.0625	0.1381	0.1139	0.1039	0.1569	0.1171	0.1701	0.1394	0.1138	0.1425			252	0.0521	0.0393	0.0252	0.0916
626.2	0.244212	0.244721	0.270719	0.227032	0.222874	0.222134	0.594483	0.514066	0.675299	0.238903	0.20602	0.210116			626.2	0.274647	0.230208	0.241806	0.214168	0.215814	0.212908	0.471699	0.395998	0.449709	0.250696	0.23221	0.201814			252.4	0.0652	0.0841	0.0613	0.1379	0.1136	0.1055	0.1567	0.1173	0.1705	0.1403	0.1147	0.1429			252.4	0.0531	0.0387	0.0249	0.0909
626.4	0.242235	0.242818	0.26851	0.225247	0.221157	0.220326	0.589271	0.509234	0.668965	0.236659	0.204563	0.208468			626.4	0.272611	0.228256	0.239784	0.212336	0.214096	0.21129	0.467642	0.392516	0.445387	0.248364	0.230442	0.2004			252.8	0.0664	0.0841	0.0625	0.1388	0.1143	0.1049	0.1576	0.1177	0.1702	0.1397	0.1137	0.1415			252.8	0.0538	0.0394	0.0253	0.0917
626.6	0.240991	0.2416	0.26701	0.224008	0.219933	0.219196	0.585791	0.506348	0.664847	0.235456	0.203425	0.20718			626.6	0.271175	0.22703	0.23847	0.211214	0.212953	0.210177	0.464875	0.390226	0.442645	0.24693	0.229179	0.199272			253.2	0.0657	0.0849	0.063	0.1382	0.1139	0.1064	0.157	0.1176	0.1704	0.14	0.1142	0.1415			253.2	0.0529	0.0387	0.0256	0.0922
626.8	0.239334	0.240142	0.265194	0.222551	0.218412	0.21776	0.581582	0.502635	0.659925	0.233984	0.201959	0.205722			626.8	0.269367	0.225512	0.236902	0.209846	0.211621	0.208836	0.461469	0.387366	0.43895	0.245159	0.227602	0.198179			253.6	0.0659	0.0845	0.0623	0.1392	0.1145	0.1054	0.158	0.1172	0.1705	0.1398	0.1145	0.1416			253.6	0.0532	0.0391	0.0246	0.092
627	0.237446	0.238063	0.263129	0.220758	0.216638	0.216014	0.576753	0.498351	0.654141	0.232034	0.20023	0.204185			627	0.267127	0.22366	0.235188	0.208086	0.20992	0.207043	0.457785	0.384049	0.43544	0.242892	0.225533	0.196389			254	0.0666	0.0847	0.0629	0.1387	0.1144	0.1047	0.1575	0.1175	0.1707	0.1397	0.1136	0.1415			254	0.0534	0.0386	0.0245	0.0927
627.2	0.236421	0.237058	0.262078	0.219902	0.215756	0.21511	0.574248	0.496302	0.651206	0.230948	0.199332	0.203334			627.2	0.266055	0.22265	0.234319	0.207208	0.209018	0.206178	0.455895	0.382408	0.433762	0.241742	0.224553	0.195642			254.4	0.0664	0.0849	0.0624	0.1375	0.1136	0.1043	0.1563	0.1178	0.1705	0.1403	0.1144	0.1424			254.4	0.0536	0.0395	0.024	0.0913
627.4	0.23441	0.235196	0.26001	0.218263	0.214018	0.213356	0.569532	0.492028	0.645175	0.22924	0.197846	0.201618			627.4	0.263954	0.220855	0.232318	0.205406	0.207375	0.204551	0.452131	0.379125	0.429787	0.239855	0.222733	0.194042			254.8	0.0671	0.0855	0.0627	0.1375	0.1143	0.1055	0.1563	0.1183	0.1703	0.1395	0.1142	0.1425			254.8	0.053	0.0395	0.0248	0.0926
627.6	0.232579	0.233366	0.257586	0.216429	0.212247	0.211846	0.564865	0.487819	0.639537	0.227363	0.196135	0.200183			627.6	0.261732	0.219111	0.230403	0.203718	0.205638	0.202994	0.448609	0.375962	0.425646	0.23794	0.220704	0.192322			255.2	0.0665	0.0846	0.0622	0.1384	0.1144	0.1055	0.1572	0.1172	0.1712	0.1389	0.1147	0.143			255.2	0.0547	0.0392	0.0249	0.0918
627.8	0.231612	0.232428	0.256491	0.215604	0.211486	0.211028	0.562513	0.485803	0.636738	0.226498	0.19534	0.199328			627.8	0.260726	0.218207	0.229494	0.202906	0.204826	0.202234	0.446898	0.374686	0.423657	0.23682	0.219935	0.191556			255.6	0.0662	0.085	0.0637	0.1386	0.114	0.1056	0.1574	0.1177	0.1705	0.1394	0.1131	0.1416			255.6	0.0542	0.0395	0.0255	0.0911
628	0.229696	0.23043	0.254302	0.213897	0.209767	0.209458	0.557638	0.481503	0.631479	0.224537	0.193654	0.197602			628	0.258693	0.216417	0.22765	0.201269	0.203116	0.200634	0.442822	0.371555	0.420066	0.234834	0.218024	0.18994			256	0.0665	0.0854	0.0625	0.1383	0.1144	0.1048	0.1571	0.1175	0.1705	0.1397	0.1142	0.1424			256	0.0534	0.0389	0.0254	0.0923
628.2	0.228107	0.228881	0.252561	0.212523	0.20841	0.208087	0.55375	0.477888	0.627085	0.222999	0.192308	0.196212			628.2	0.256978	0.21499	0.22619	0.199854	0.201802	0.199282	0.439491	0.368775	0.417213	0.233048	0.21649	0.188605			256.4	0.0671	0.0864	0.063	0.1383	0.1148	0.105	0.1571	0.1164	0.1701	0.1403	0.1143	0.1421			256.4	0.0534	0.0402	0.0249	0.0936
628.4	0.22692	0.227551	0.251088	0.211362	0.207267	0.206904	0.550688	0.475173	0.623563	0.221776	0.191316	0.195233			628.4	0.255631	0.213763	0.224971	0.198799	0.20074	0.198246	0.437009	0.366681	0.41468	0.231503	0.215166	0.187767			256.8	0.0679	0.0855	0.0625	0.1378	0.1133	0.1063	0.1566	0.1181	0.1701	0.1405	0.1141	0.1422			256.8	0.0536	0.0396	0.0246	0.0919
628.6	0.224971	0.225608	0.249002	0.209616	0.205535	0.205284	0.545914	0.471177	0.618109	0.219766	0.189889	0.193974			628.6	0.253574	0.211885	0.22312	0.197328	0.199091	0.196622	0.433294	0.363726	0.411226	0.229428	0.213215	0.186479			257.2	0.0674	0.0857	0.0634	0.1398	0.1139	0.1061	0.1586	0.117	0.1705	0.14	0.1144	0.1421			257.2	0.0541	0.0398	0.0247	0.0927
628.8	0.224036	0.224612	0.248005	0.20877	0.204701	0.204481	0.543772	0.469229	0.615385	0.218783	0.189224	0.193337			628.8	0.252403	0.211105	0.22216	0.196584	0.198353	0.195803	0.431424	0.362226	0.409599	0.228408	0.212336	0.185815			257.6	0.0677	0.0846	0.0639	0.1384	0.1141	0.1063	0.1572	0.1182	0.1707	0.1398	0.1142	0.1429			257.6	0.0539	0.0389	0.0251	0.0924
629	0.222221	0.222713	0.246005	0.207145	0.202941	0.202835	0.539338	0.465495	0.61051	0.216899	0.187865	0.19175			629	0.250345	0.209356	0.220411	0.19493	0.196751	0.194309	0.4279	0.359148	0.406657	0.226736	0.210557	0.184555			258	0.0678	0.0857	0.0638	0.138	0.1143	0.1066	0.1568	0.1173	0.171	0.1392	0.114	0.1425			258	0.0539	0.0385	0.0253	0.093
629.2	0.22094	0.221438	0.244655	0.206025	0.201761	0.201686	0.536632	0.462868	0.607255	0.2158	0.186743	0.190512			629.2	0.249004	0.208124	0.219147	0.193821	0.195736	0.193358	0.425583	0.357184	0.404557	0.225593	0.209516	0.183304			258.4	0.0662	0.0856	0.0634	0.139	0.1149	0.1061	0.1578	0.1171	0.1707	0.1393	0.1148	0.1419			258.4	0.0548	0.04	0.0258	0.0936
629.4	0.219349	0.219933	0.243013	0.20462	0.200431	0.200327	0.533121	0.459965	0.603083	0.214448	0.185517	0.189047			629.4	0.247211	0.206699	0.217637	0.192536	0.194542	0.192088	0.422609	0.354925	0.401838	0.224116	0.208195	0.18185			258.8	0.0669	0.0862	0.0629	0.1384	0.1146	0.106	0.1572	0.1187	0.1705	0.1399	0.115	0.1428			258.8	0.0545	0.0402	0.0252	0.0927
629.6	0.217542	0.218083	0.241042	0.202918	0.19882	0.198738	0.528767	0.456301	0.598503	0.212984	0.183979	0.18724			629.6	0.245076	0.205102	0.21595	0.190914	0.193	0.190496	0.418836	0.351913	0.398939	0.222647	0.206414	0.180068			259.2	0.0673	0.0864	0.0632	0.1392	0.1146	0.107	0.158	0.1174	0.1708	0.1394	0.115	0.1421			259.2	0.0538	0.0404	0.0245	0.0926
629.8	0.216647	0.21716	0.240059	0.20217	0.198111	0.197881	0.526611	0.454426	0.596094	0.212067	0.183345	0.18652			629.8	0.244184	0.204279	0.215143	0.190156	0.192228	0.189732	0.41716	0.350325	0.397249	0.221806	0.205551	0.179373			259.6	0.0689	0.0855	0.0631	0.1381	0.1148	0.107	0.1569	0.1166	0.1698	0.1399	0.1142	0.1433			259.6	0.0536	0.0402	0.025	0.0921
630	0.214807	0.215228	0.238043	0.200503	0.196569	0.196311	0.522526	0.450642	0.591066	0.210255	0.181967	0.185192			630	0.242078	0.202551	0.213276	0.188531	0.190561	0.18818	0.413603	0.347572	0.394264	0.219806	0.203758	0.177549			260	0.0675	0.0858	0.0641	0.1384	0.1141	0.1062	0.1572	0.1179	0.1706	0.1395	0.1146	0.1428			260	0.0543	0.0402	0.0252	0.0931
630.2	0.21363	0.214072	0.236664	0.199393	0.195528	0.195225	0.519634	0.448122	0.587809	0.209245	0.181132	0.184263			630.2	0.240734	0.201347	0.212137	0.187592	0.189497	0.187173	0.411244	0.34559	0.392144	0.218786	0.202715	0.176729			260.4	0.0675	0.0857	0.0645	0.1386	0.1152	0.1073	0.1574	0.1196	0.1712	0.1398	0.1135	0.1426			260.4	0.0543	0.0399	0.0251	0.0933
630.4	0.212196	0.212675	0.234981	0.198054	0.194257	0.193809	0.516306	0.445098	0.583878	0.207913	0.179888	0.182923			630.4	0.23901	0.200074	0.210571	0.186445	0.188341	0.18601	0.408461	0.343253	0.389382	0.217513	0.201528	0.175664			260.8	0.0673	0.0855	0.0647	0.1379	0.1154	0.1065	0.1567	0.1177	0.1707	0.1392	0.1145	0.1424			260.8	0.0541	0.0396	0.026	0.0926
630.6	0.210425	0.210794	0.232947	0.196445	0.192646	0.192237	0.51217	0.441675	0.579546	0.206089	0.178435	0.181257			630.6	0.237044	0.198243	0.208774	0.18511	0.186806	0.184365	0.40517	0.340468	0.386076	0.215837	0.200024	0.173995			261.2	0.0671	0.0862	0.064	0.1391	0.1151	0.1066	0.1579	0.1179	0.1709	0.1416	0.1143	0.1423			261.2	0.0539	0.04	0.0261	0.0927
630.8	0.208942	0.209211	0.231326	0.195101	0.191272	0.190898	0.508753	0.439101	0.575912	0.204741	0.177224	0.179759			630.8	0.23547	0.196911	0.207378	0.183885	0.185446	0.183063	0.402057	0.338286	0.383787	0.214327	0.19869	0.172816			261.6	0.0674	0.0865	0.0644	0.1388	0.1156	0.1071	0.1576	0.1179	0.1703	0.1391	0.1144	0.1424			261.6	0.0538	0.0397	0.0259	0.0924
631	0.207741	0.207967	0.230112	0.194056	0.190243	0.189799	0.50614	0.436925	0.572779	0.203594	0.17624	0.17877			631	0.234094	0.195788	0.206224	0.182882	0.184462	0.181958	0.399693	0.336368	0.381705	0.213253	0.19763	0.172131			262	0.0674	0.0869	0.0641	0.1385	0.1148	0.108	0.1573	0.1181	0.1698	0.1389	0.1141	0.1426			262	0.0539	0.0395	0.0246	0.0931
631.2	0.205873	0.206185	0.228234	0.192523	0.188762	0.188198	0.502174	0.433601	0.568502	0.201893	0.174771	0.177525			631.2	0.232115	0.194264	0.204521	0.181438	0.183014	0.18048	0.396425	0.333705	0.37855	0.211448	0.195989	0.170842			262.4	0.068	0.0865	0.0639	0.1383	0.1145	0.1076	0.1571	0.1172	0.1706	0.1398	0.1131	0.1424			262.4	0.054	0.04	0.0255	0.0929
631.4	0.20496	0.205281	0.227294	0.19176	0.188021	0.187321	0.50021	0.432368	0.566429	0.201168	0.174064	0.176986			631.4	0.231189	0.193483	0.203671	0.180772	0.182291	0.179766	0.394922	0.332628	0.377223	0.210615	0.195053	0.170411			262.8	0.0678	0.0861	0.0644	0.1387	0.115	0.1077	0.1575	0.1171	0.1703	0.1388	0.1145	0.1428			262.8	0.0545	0.0397	0.0249	0.094
631.6	0.203289	0.203693	0.225438	0.190257	0.186577	0.185849	0.496616	0.429376	0.562249	0.19949	0.172741	0.175314			631.6	0.229314	0.192038	0.201971	0.179282	0.180757	0.178332	0.391909	0.330113	0.374567	0.20914	0.193577	0.169099			263.2	0.0685	0.0866	0.0641	0.1386	0.1144	0.1083	0.1574	0.1184	0.1706	0.1393	0.114	0.1416			263.2	0.0541	0.04	0.0257	0.0933
631.8	0.202167	0.202622	0.224125	0.18927	0.185597	0.184764	0.494327	0.427157	0.559774	0.198639	0.171639	0.173978			631.8	0.228043	0.191038	0.200852	0.178204	0.179844	0.177281	0.390002	0.328339	0.372738	0.208312	0.192472	0.167938			263.6	0.0677	0.0866	0.0639	0.138	0.1148	0.1064	0.1568	0.1176	0.17	0.1405	0.1149	0.1419			263.6	0.0542	0.0404	0.0255	0.0933
632	0.200806	0.201299	0.222463	0.188028	0.184358	0.183371	0.49127	0.424456	0.55666	0.197537	0.170246	0.172623			632	0.226544	0.1897	0.199462	0.176948	0.178584	0.176045	0.387538	0.326307	0.370532	0.207069	0.191249	0.166627			264	0.0676	0.0867	0.0634	0.1387	0.1146	0.1075	0.1575	0.1175	0.1703	0.1404	0.1144	0.1423			264	0.0555	0.0405	0.0257	0.093
632.2	0.19899	0.199625	0.220632	0.186553	0.182895	0.181868	0.487729	0.421445	0.552586	0.196167	0.168875	0.171264			632.2	0.224769	0.188041	0.197837	0.175488	0.177103	0.174381	0.384726	0.324061	0.367614	0.205311	0.1897	0.165092			264.4	0.0674	0.0874	0.0646	0.1382	0.1145	0.1076	0.157	0.1172	0.1708	0.1397	0.1146	0.1417			264.4	0.055	0.0411	0.0256	0.0932
632.4	0.198259	0.198807	0.219754	0.185792	0.182157	0.18125	0.485991	0.419958	0.550754	0.195219	0.16822	0.170673			632.4	0.223864	0.187362	0.197058	0.174756	0.176338	0.173733	0.383619	0.323005	0.366048	0.204513	0.188925	0.164424			264.8	0.0686	0.0873	0.0641	0.1378	0.1139	0.1084	0.1566	0.1182	0.1711	0.1395	0.1137	0.1429			264.8	0.0546	0.0399	0.0254	0.0932
632.6	0.196727	0.197345	0.217925	0.184325	0.180714	0.179754	0.482759	0.416831	0.546883	0.193665	0.166857	0.169495			632.6	0.222077	0.18568	0.195542	0.173286	0.17478	0.172278	0.380828	0.320739	0.363188	0.202928	0.187559	0.163393			265.2	0.0687	0.0872	0.0646	0.1385	0.1148	0.1077	0.1573	0.1168	0.171	0.1402	0.1147	0.1434			265.2	0.0541	0.0406	0.0253	0.0927
632.8	0.195571	0.196319	0.216664	0.183354	0.179758	0.178806	0.480297	0.414882	0.544222	0.192485	0.165976	0.168727			632.8	0.220924	0.184701	0.194493	0.172393	0.173899	0.171348	0.379122	0.319199	0.361391	0.201675	0.186602	0.162576			265.6	0.0679	0.0868	0.0642	0.1384	0.1143	0.1077	0.1572	0.1179	0.172	0.1397	0.1131	0.1428			265.6	0.0534	0.0403	0.0258	0.094
633	0.194159	0.195036	0.215136	0.182132	0.178464	0.177675	0.477397	0.412442	0.540902	0.191188	0.164825	0.167518			633	0.219317	0.183464	0.193107	0.171253	0.172705	0.170215	0.376935	0.317382	0.359251	0.200175	0.185389	0.161432			266	0.068	0.088	0.0649	0.1388	0.1148	0.1077	0.1576	0.1175	0.17	0.1392	0.1151	0.142			266	0.0551	0.0403	0.0254	0.0932
633.2	0.192562	0.193457	0.21331	0.180687	0.177022	0.176256	0.473959	0.409793	0.537268	0.18971	0.163421	0.166068			633.2	0.217645	0.181936	0.191636	0.169913	0.171429	0.168647	0.374202	0.315206	0.356614	0.198715	0.184203	0.160369			266.4	0.0677	0.0866	0.0642	0.1395	0.1148	0.1081	0.1583	0.117	0.1705	0.1393	0.1143	0.1423			266.4	0.0543	0.041	0.026	0.0934
633.4	0.191293	0.192219	0.211875	0.179507	0.175854	0.175167	0.471343	0.4075	0.534173	0.188448	0.162406	0.164796			633.4	0.216149	0.180766	0.190285	0.168731	0.170254	0.167422	0.37203	0.313408	0.35462	0.197305	0.183008	0.159159			266.8	0.0688	0.0879	0.065	0.1393	0.1149	0.1076	0.1581	0.118	0.1701	0.1394	0.1139	0.1427			266.8	0.0561	0.0412	0.026	0.0938
633.6	0.190245	0.191127	0.21064	0.17856	0.174912	0.174276	0.469107	0.405478	0.531607	0.1873	0.161478	0.163894			633.6	0.215022	0.1798	0.189263	0.167745	0.169369	0.166468	0.370196	0.311728	0.353067	0.196192	0.182032	0.158119			267.2	0.0681	0.0874	0.0651	0.1387	0.1146	0.1087	0.1575	0.1175	0.1688	0.1396	0.1144	0.1425			267.2	0.0546	0.0402	0.0255	0.0937
633.8	0.188822	0.189592	0.208951	0.176943	0.173591	0.172978	0.465897	0.402649	0.527953	0.185856	0.160039	0.162626			633.8	0.213264	0.178433	0.187739	0.166318	0.168001	0.165321	0.367539	0.309709	0.350917	0.194488	0.180285	0.157			267.6	0.0695	0.0875	0.0644	0.1389	0.1153	0.1077	0.1577	0.118	0.171	0.1397	0.1149	0.142			267.6	0.0552	0.0402	0.0263	0.0935
634	0.18806	0.188809	0.208082	0.176268	0.173009	0.172261	0.464434	0.401114	0.525954	0.185058	0.15943	0.162188			634	0.212368	0.177708	0.186976	0.165608	0.16737	0.164713	0.366407	0.308728	0.349536	0.193646	0.179613	0.156552			268	0.0685	0.0872	0.0648	0.1383	0.1152	0.1078	0.1571	0.1175	0.1702	0.1391	0.115	0.1426			268	0.0553	0.0407	0.0256	0.0938
634.2	0.186631	0.187341	0.206451	0.174778	0.171551	0.170813	0.461026	0.398302	0.522541	0.183458	0.15837	0.160925			634.2	0.2108	0.176168	0.185506	0.164303	0.166008	0.163355	0.363943	0.3066	0.347361	0.192016	0.178253	0.155111			268.4	0.0693	0.0868	0.0646	0.1391	0.115	0.1079	0.1579	0.1171	0.1714	0.1397	0.1146	0.1426			268.4	0.0553	0.0406	0.0256	0.0936
634.4	0.185677	0.186371	0.205209	0.173796	0.170634	0.169863	0.459082	0.396644	0.520249	0.182425	0.157548	0.160081			634.4	0.209658	0.175199	0.184512	0.163465	0.16518	0.162421	0.362403	0.305205	0.345842	0.190931	0.177316	0.154319			268.8	0.0685	0.0881	0.0655	0.1396	0.1157	0.1081	0.1584	0.1174	0.1714	0.1402	0.1142	0.1429			268.8	0.0548	0.041	0.0262	0.0943
634.6	0.18448	0.185125	0.203709	0.172518	0.16946	0.168737	0.456871	0.394314	0.517403	0.181161	0.156642	0.158956			634.6	0.20821	0.173944	0.183262	0.162345	0.164073	0.161268	0.360652	0.303216	0.3438	0.189593	0.176386	0.153221			269.2	0.0683	0.0886	0.0648	0.1392	0.1161	0.1097	0.158	0.1173	0.1705	0.1402	0.1128	0.1422			269.2	0.0553	0.0416	0.0258	0.0933
634.8	0.182973	0.183592	0.202083	0.171042	0.168074	0.167337	0.453943	0.391617	0.513801	0.179682	0.155206	0.157772			634.8	0.206458	0.17249	0.181799	0.161056	0.162797	0.159872	0.358331	0.30136	0.341135	0.187995	0.174833	0.151972			269.6	0.0697	0.0886	0.0647	0.1397	0.1156	0.1091	0.1585	0.1177	0.1706	0.1387	0.1143	0.1428			269.6	0.0545	0.0414	0.0266	0.0938
635	0.182273	0.182883	0.201219	0.170267	0.16738	0.166655	0.452547	0.390386	0.512084	0.178914	0.154611	0.157178			635	0.20565	0.171698	0.180991	0.160482	0.162113	0.159235	0.357028	0.300397	0.339953	0.187225	0.17426	0.151427			270	0.0689	0.0873	0.065	0.1383	0.116	0.1088	0.1571	0.1179	0.1703	0.1381	0.1147	0.1415			270	0.0561	0.0406	0.0254	0.094
635.2	0.180653	0.181376	0.199692	0.16892	0.165981	0.165355	0.449564	0.38791	0.508476	0.177261	0.153594	0.156058			635.2	0.203916	0.17038	0.17954	0.159119	0.160731	0.157868	0.354664	0.298183	0.337553	0.185586	0.172795	0.150185			270.4	0.069	0.0878	0.0645	0.1388	0.115	0.1087	0.1576	0.1179	0.1698	0.1385	0.1153	0.1433			270.4	0.0555	0.0408	0.0264	0.094
635.4	0.179631	0.180294	0.198569	0.167993	0.165108	0.164479	0.447638	0.386273	0.506428	0.176232	0.15276	0.15522			635.4	0.202771	0.16943	0.178607	0.158292	0.159862	0.157038	0.353083	0.296728	0.336385	0.184587	0.172005	0.149279			270.8	0.0687	0.0879	0.0644	0.1385	0.1155	0.1088	0.1573	0.1169	0.1708	0.1389	0.1148	0.1422			270.8	0.0544	0.0404	0.0266	0.0944
635.6	0.178376	0.179016	0.197192	0.166827	0.164004	0.163288	0.445068	0.38439	0.503572	0.175154	0.151903	0.15406			635.6	0.201394	0.168226	0.177407	0.157282	0.158799	0.15589	0.35095	0.294821	0.334614	0.183176	0.170879	0.148358			271.2	0.0691	0.0888	0.0643	0.1389	0.1153	0.1095	0.1577	0.1181	0.1709	0.1401	0.1131	0.1424			271.2	0.0545	0.041	0.0267	0.0935
635.8	0.176909	0.177391	0.195527	0.165516	0.162685	0.161914	0.4421	0.381911	0.500147	0.173632	0.150751	0.15265			635.8	0.199598	0.16688	0.175878	0.156035	0.157513	0.154655	0.348676	0.292441	0.332165	0.181531	0.169433	0.147042			271.6	0.069	0.0886	0.0654	0.1393	0.1154	0.1091	0.1581	0.1174	0.1705	0.14	0.1147	0.1426			271.6	0.057	0.042	0.0258	0.0933
636	0.175982	0.176287	0.194438	0.164598	0.161802	0.160983	0.440287	0.380315	0.498101	0.172742	0.14994	0.151723			636	0.198521	0.165896	0.174823	0.155139	0.156706	0.153842	0.347082	0.291371	0.330642	0.180616	0.168495	0.146285			272	0.0694	0.0886	0.0659	0.1392	0.1156	0.1088	0.158	0.1175	0.1701	0.1396	0.1143	0.1426			272	0.0557	0.0414	0.0264	0.0936
636.2	0.17471	0.174976	0.193002	0.163442	0.16074	0.159883	0.43797	0.37842	0.495656	0.171536	0.148982	0.150683			636.2	0.197148	0.164822	0.173527	0.154055	0.155636	0.152806	0.344994	0.289927	0.328864	0.179387	0.167364	0.145305			272.4	0.0701	0.088	0.0657	0.1391	0.1163	0.1089	0.1579	0.1172	0.17	0.1385	0.1151	0.1432			272.4	0.0558	0.0416	0.0262	0.0951
636.4	0.173223	0.173399	0.191459	0.162128	0.159459	0.158461	0.435232	0.375869	0.492351	0.170113	0.147811	0.149273			636.4	0.195469	0.163532	0.172086	0.152866	0.154327	0.151618	0.342702	0.287785	0.32655	0.177903	0.165811	0.143938			272.8	0.0702	0.0893	0.0651	0.1386	0.1152	0.1088	0.1574	0.1181	0.1707	0.1385	0.1137	0.1421			272.8	0.0549	0.0408	0.0265	0.0941
636.6	0.172467	0.172635	0.190635	0.161497	0.158779	0.157708	0.433603	0.374597	0.490695	0.16934	0.147066	0.148546			636.6	0.19477	0.162889	0.171358	0.15222	0.153753	0.151018	0.341632	0.286721	0.325336	0.17712	0.165015	0.143214			273.2	0.0696	0.0893	0.0659	0.1385	0.1168	0.1101	0.1573	0.1172	0.171	0.1394	0.1137	0.1422			273.2	0.0553	0.0411	0.0275	0.0947
636.8	0.170929	0.171167	0.189145	0.160151	0.157458	0.156396	0.430739	0.372314	0.487824	0.167848	0.145977	0.147015			636.8	0.193194	0.161571	0.169887	0.150985	0.152432	0.149775	0.339382	0.284904	0.323174	0.175536	0.163768	0.141951			273.6	0.0706	0.0891	0.0661	0.1389	0.1147	0.1091	0.1577	0.1172	0.1698	0.1393	0.1149	0.1431			273.6	0.0561	0.0417	0.0261	0.0933
637	0.169958	0.170191	0.188059	0.159397	0.156551	0.155496	0.429003	0.370825	0.485727	0.166967	0.145382	0.146161			637	0.192176	0.160692	0.168911	0.150221	0.151552	0.14889	0.337833	0.283629	0.321668	0.174656	0.162977	0.141136			274	0.0693	0.0896	0.0661	0.1393	0.1159	0.1108	0.1581	0.1165	0.1704	0.1398	0.1135	0.1428			274	0.0564	0.0408	0.026	0.0957
637.2	0.168699	0.169036	0.186745	0.158353	0.155333	0.154449	0.426756	0.368942	0.483171	0.165943	0.144529	0.144985			637.2	0.190875	0.159627	0.167689	0.149221	0.150453	0.147798	0.335879	0.281954	0.319753	0.173677	0.16193	0.140089			274.4	0.0693	0.0892	0.0664	0.1392	0.1156	0.1101	0.158	0.1178	0.171	0.1391	0.1139	0.1428			274.4	0.0553	0.042	0.0253	0.0943
637.4	0.167181	0.167672	0.18517	0.157192	0.154107	0.15319	0.424225	0.366601	0.480196	0.164617	0.143282	0.143754			637.4	0.189309	0.158391	0.166341	0.147998	0.149243	0.146594	0.333823	0.280066	0.317582	0.172225	0.160657	0.138873			274.8	0.0703	0.0886	0.0656	0.1386	0.1164	0.1099	0.1574	0.1174	0.1712	0.1386	0.114	0.1423			274.8	0.0556	0.0416	0.0273	0.0943
637.6	0.166255	0.166721	0.184136	0.156399	0.153315	0.152362	0.422489	0.364977	0.478166	0.163813	0.142487	0.143053			637.6	0.188302	0.157458	0.165477	0.147154	0.148373	0.145826	0.332406	0.278875	0.316222	0.171451	0.15978	0.138272			275.2	0.0701	0.0882	0.0661	0.1383	0.1159	0.1097	0.1571	0.1174	0.1712	0.1397	0.1137	0.1426			275.2	0.0549	0.0415	0.0272	0.0947
637.8	0.165121	0.165487	0.182866	0.155407	0.152335	0.15135	0.420029	0.362879	0.475796	0.162634	0.141359	0.141993			637.8	0.187074	0.156347	0.164319	0.146154	0.147339	0.144869	0.330577	0.277506	0.314562	0.170265	0.158625	0.137194			275.6	0.0706	0.09	0.0664	0.1381	0.1154	0.1102	0.1569	0.1174	0.171	0.1394	0.1137	0.1426			275.6	0.0556	0.0412	0.027	0.0945
638	0.163768	0.164053	0.181274	0.154178	0.151061	0.150187	0.417119	0.360446	0.472838	0.161112	0.140429	0.140748			638	0.185567	0.154966	0.162983	0.144933	0.14602	0.143702	0.328032	0.275468	0.312724	0.168856	0.157473	0.136222			276	0.0703	0.0895	0.0673	0.139	0.1144	0.1101	0.1578	0.1172	0.1711	0.1403	0.1139	0.1428			276	0.0558	0.0419	0.0263	0.0936
638.2	0.163093	0.163331	0.180615	0.153615	0.150456	0.149558	0.415815	0.359334	0.471245	0.16046	0.139972	0.140031			638.2	0.184787	0.154427	0.16231	0.144399	0.145431	0.14314	0.326947	0.274661	0.311814	0.168065	0.156782	0.135502			276.4	0.07	0.089	0.0663	0.1391	0.1166	0.1106	0.1579	0.1173	0.1701	0.1387	0.1142	0.1422			276.4	0.0558	0.0422	0.0262	0.0944
638.4	0.161664	0.161971	0.179088	0.152333	0.149242	0.14832	0.413311	0.357068	0.468411	0.159021	0.138782	0.138626			638.4	0.183277	0.153188	0.160941	0.143331	0.144293	0.141986	0.324749	0.272929	0.310101	0.166514	0.155664	0.134174			276.8	0.0691	0.09	0.0664	0.1393	0.1157	0.1101	0.1581	0.1176	0.1698	0.1395	0.1146	0.1419			276.8	0.0553	0.0424	0.026	0.0958
638.6	0.160804	0.161142	0.178069	0.15146	0.148424	0.147486	0.411503	0.355521	0.466345	0.158167	0.138024	0.137846			638.6	0.182271	0.152351	0.160062	0.142521	0.14353	0.141262	0.323289	0.271601	0.308371	0.165517	0.154798	0.133432			277.2	0.0702	0.09	0.0659	0.1386	0.1163	0.1106	0.1574	0.1178	0.1706	0.1379	0.1139	0.1436			277.2	0.0567	0.0418	0.0274	0.0945
638.8	0.159708	0.16004	0.176706	0.150392	0.14736	0.146536	0.409342	0.353549	0.463866	0.157045	0.136976	0.136917			638.8	0.180961	0.151344	0.158906	0.141476	0.142512	0.140286	0.321458	0.270046	0.306586	0.164547	0.153836	0.132366			277.6	0.0701	0.0895	0.0662	0.1381	0.1156	0.1096	0.1569	0.1178	0.1702	0.1397	0.1148	0.142			277.6	0.0556	0.0414	0.0274	0.0943
639	0.158333	0.158658	0.175266	0.149136	0.14611	0.145384	0.406696	0.351355	0.461099	0.155697	0.13577	0.135925			639	0.179668	0.150013	0.157658	0.14029	0.141346	0.139128	0.319247	0.268398	0.304968	0.163147	0.152551	0.131338			278	0.0703	0.0895	0.0668	0.138	0.1149	0.111	0.1568	0.118	0.1706	0.1392	0.1144	0.1431			278	0.0564	0.0418	0.0274	0.0948
639.2	0.15744	0.157827	0.174313	0.148383	0.145296	0.144657	0.404993	0.349906	0.459068	0.15482	0.135066	0.13523			639.2	0.178608	0.14924	0.156771	0.13955	0.140435	0.13832	0.31781	0.267055	0.30355	0.162124	0.151654	0.130541			278.4	0.07	0.0897	0.0663	0.139	0.115	0.1107	0.1578	0.1167	0.1714	0.1406	0.1146	0.1424			278.4	0.0563	0.0427	0.0267	0.0957
639.4	0.156395	0.15674	0.17311	0.147426	0.144291	0.143642	0.402912	0.347952	0.456416	0.153728	0.134068	0.134195			639.4	0.177352	0.148127	0.155718	0.138566	0.139388	0.137323	0.316223	0.265358	0.301769	0.160985	0.150558	0.129492			278.8	0.0705	0.0898	0.0672	0.1388	0.1161	0.1115	0.1576	0.1173	0.1703	0.1389	0.1139	0.1419			278.8	0.0564	0.0411	0.0277	0.0943
639.6	0.155086	0.155544	0.171595	0.146251	0.143043	0.14254	0.400049	0.345815	0.453635	0.152507	0.133116	0.133147			639.6	0.175846	0.146878	0.15445	0.137371	0.13812	0.136269	0.314031	0.263585	0.299768	0.159696	0.149462	0.128475			279.2	0.0708	0.091	0.0674	0.1394	0.1167	0.1105	0.1582	0.1167	0.1704	0.1403	0.114	0.1422			279.2	0.0565	0.0425	0.027	0.0965
639.8	0.154417	0.154867	0.17084	0.145646	0.142548	0.141962	0.399016	0.34467	0.45244	0.151883	0.132682	0.132787			639.8	0.175089	0.14618	0.153731	0.136817	0.137563	0.135666	0.312877	0.262738	0.298659	0.159115	0.148972	0.128239			279.6	0.0709	0.0899	0.0676	0.1387	0.1177	0.1109	0.1575	0.1178	0.1719	0.1396	0.1155	0.1429			279.6	0.0568	0.0414	0.0266	0.0954
640	0.153164	0.153588	0.169391	0.144423	0.14129	0.140846	0.396744	0.342589	0.449496	0.150864	0.131634	0.131729			640	0.173528	0.144868	0.152469	0.135641	0.136316	0.134621	0.310891	0.2613	0.296528	0.157948	0.14782	0.127245			280	0.0709	0.0903	0.0664	0.1378	0.116	0.111	0.1566	0.1177	0.1705	0.1396	0.1138	0.1418			280	0.0563	0.0416	0.0268	0.0949
640.2	0.152262	0.152756	0.168445	0.143609	0.140492	0.140076	0.39511	0.341049	0.447461	0.150035	0.130681	0.130785			640.2	0.172527	0.144096	0.151641	0.134826	0.135524	0.133923	0.309495	0.260017	0.295249	0.156935	0.147009	0.126433			280.4	0.0708	0.0898	0.0675	0.1383	0.1163	0.1111	0.1571	0.1177	0.1703	0.1396	0.114	0.1429			280.4	0.0564	0.0419	0.0273	0.0952
640.4	0.15124	0.151631	0.167301	0.142628	0.139605	0.139047	0.393104	0.3391	0.445146	0.148924	0.129685	0.129689			640.4	0.171427	0.143035	0.150622	0.133914	0.134601	0.132893	0.307774	0.258438	0.293791	0.155738	0.146018	0.125448			280.8	0.0704	0.091	0.0662	0.1386	0.1152	0.1111	0.1574	0.1176	0.1702	0.1399	0.1142	0.142			280.8	0.0568	0.0419	0.028	0.0957
640.6	0.149912	0.150258	0.165852	0.141368	0.138421	0.137951	0.390655	0.336899	0.442113	0.147767	0.128581	0.128582			640.6	0.169883	0.141805	0.14924	0.132794	0.13343	0.131797	0.305707	0.25681	0.291836	0.154568	0.14484	0.124213			281.2	0.0711	0.0904	0.0672	0.1385	0.1167	0.1103	0.1573	0.1169	0.1715	0.1392	0.1145	0.1424			281.2	0.0571	0.0421	0.0271	0.0949
640.8	0.148998	0.14947	0.164962	0.140539	0.137557	0.137193	0.388972	0.335263	0.44025	0.146987	0.127976	0.127719			640.8	0.168934	0.141098	0.148363	0.132055	0.132708	0.131017	0.304383	0.255593	0.290515	0.15376	0.144076	0.123169			281.6	0.0708	0.0899	0.067	0.1393	0.1159	0.1113	0.1581	0.1175	0.1705	0.1399	0.1147	0.1437			281.6	0.0564	0.0425	0.0266	0.0953
641	0.147904	0.148496	0.16376	0.139531	0.136465	0.136252	0.386966	0.333476	0.437827	0.146046	0.127144	0.126806			641	0.167718	0.140176	0.147355	0.131144	0.13182	0.130033	0.302629	0.254132	0.288723	0.152834	0.143104	0.122159			282	0.0704	0.0903	0.0669	0.1377	0.1169	0.1116	0.1565	0.1172	0.1701	0.1403	0.1146	0.1427			282	0.0559	0.0414	0.0274	0.0957
641.2	0.146622	0.147294	0.162426	0.138418	0.135268	0.13502	0.384387	0.331343	0.435082	0.145091	0.125897	0.125793			641.2	0.166336	0.139061	0.146076	0.130075	0.13085	0.128893	0.300656	0.252411	0.286509	0.151648	0.141695	0.120887			282.4	0.0715	0.0908	0.0661	0.139	0.1162	0.1117	0.1578	0.118	0.171	0.139	0.1148	0.1416			282.4	0.0568	0.0414	0.0269	0.0964
641.4	0.145966	0.146587	0.161692	0.137799	0.134683	0.134514	0.382984	0.330312	0.433715	0.144453	0.125335	0.125466			641.4	0.165593	0.138396	0.145603	0.129436	0.130289	0.1283	0.299554	0.251411	0.285311	0.151027	0.1411	0.120399			282.8	0.0708	0.0908	0.0668	0.1389	0.1155	0.1117	0.1577	0.1176	0.1707	0.1395	0.1138	0.1425			282.8	0.0575	0.042	0.0273	0.0964
641.6	0.144785	0.145318	0.160367	0.136623	0.133661	0.133362	0.380428	0.328078	0.43112	0.143388	0.124444	0.12452			641.6	0.16421	0.137218	0.144441	0.128188	0.129214	0.12733	0.297599	0.24966	0.283108	0.150112	0.140124	0.119378			283.2	0.0717	0.0916	0.0684	0.1387	0.1164	0.1111	0.1575	0.1169	0.1713	0.1384	0.1143	0.1414			283.2	0.0563	0.0421	0.0274	0.0956
641.8	0.143944	0.144509	0.159446	0.135948	0.132929	0.132596	0.378823	0.32654	0.429197	0.142599	0.123704	0.123621			641.8	0.163308	0.136467	0.143485	0.127494	0.128436	0.126584	0.296279	0.248643	0.281806	0.149379	0.139221	0.118675			283.6	0.0706	0.0916	0.0673	0.1394	0.116	0.1121	0.1582	0.1177	0.1707	0.1402	0.1133	0.1425			283.6	0.0567	0.0431	0.0272	0.0962
642	0.142852	0.143424	0.158352	0.135009	0.132	0.131574	0.376751	0.324722	0.427029	0.141589	0.12284	0.122748			642	0.162161	0.135507	0.142451	0.12665	0.127516	0.125707	0.294677	0.247317	0.28038	0.148307	0.138103	0.11779			284	0.0711	0.0914	0.0672	0.14	0.117	0.1107	0.1588	0.1182	0.1699	0.1405	0.1143	0.1423			284	0.0573	0.0421	0.0273	0.0947
642.2	0.141658	0.142208	0.156935	0.133905	0.130869	0.130428	0.374187	0.322394	0.424114	0.140414	0.122018	0.121493			642.2	0.160599	0.13434	0.141174	0.12568	0.126439	0.12457	0.292899	0.245607	0.278349	0.147282	0.137028	0.116722			284.4	0.0703	0.0913	0.0669	0.1391	0.1167	0.1114	0.1579	0.1182	0.1701	0.14	0.1133	0.1428			284.4	0.0562	0.0423	0.0265	0.0962
642.4	0.140815	0.141405	0.155999	0.13309	0.130117	0.129662	0.372479	0.320883	0.422206	0.139629	0.121393	0.120757			642.4	0.159707	0.13352	0.140445	0.12499	0.125841	0.123873	0.291461	0.244451	0.27704	0.146598	0.136367	0.116105			284.8	0.0717	0.0912	0.0679	0.1388	0.117	0.1126	0.1576	0.118	0.1715	0.1392	0.1135	0.1421			284.8	0.0558	0.042	0.0271	0.0963
642.6	0.13983	0.140382	0.154907	0.132111	0.129243	0.12874	0.370377	0.319078	0.419938	0.138642	0.120561	0.120008			642.6	0.158551	0.132506	0.13951	0.124149	0.12507	0.122954	0.289603	0.243288	0.27541	0.145677	0.135515	0.115432			285.2	0.072	0.0913	0.0674	0.1384	0.1168	0.1125	0.1572	0.1177	0.1711	0.1401	0.1145	0.1421			285.2	0.0565	0.0423	0.0285	0.0963
642.8	0.138671	0.139181	0.153495	0.130966	0.128138	0.127687	0.368155	0.316838	0.417049	0.137315	0.119548	0.119153			642.8	0.157257	0.13143	0.13833	0.123096	0.124088	0.121856	0.287735	0.241647	0.273439	0.144362	0.134451	0.114512			285.6	0.0716	0.0912	0.0683	0.1387	0.1154	0.1111	0.1575	0.1172	0.1706	0.1398	0.1145	0.1425			285.6	0.057	0.0426	0.0278	0.0957
643	0.138015	0.138572	0.152824	0.130421	0.12751	0.127139	0.366877	0.315691	0.415451	0.136661	0.118937	0.118541			643	0.156587	0.130956	0.137816	0.122538	0.123514	0.121345	0.286791	0.240889	0.27259	0.143717	0.133803	0.11383			286	0.071	0.0917	0.0685	0.1387	0.1166	0.1123	0.1575	0.1167	0.1707	0.1391	0.1142	0.1418			286	0.0568	0.0433	0.0284	0.096
643.2	0.136718	0.137334	0.151428	0.129358	0.126506	0.126046	0.364336	0.313272	0.412638	0.135421	0.118039	0.117709			643.2	0.155288	0.129839	0.136634	0.121642	0.122556	0.12033	0.284798	0.238928	0.270726	0.142446	0.132597	0.112767			286.4	0.0717	0.0913	0.0675	0.1391	0.1161	0.1117	0.1579	0.1177	0.1708	0.1391	0.1138	0.1424			286.4	0.0568	0.0427	0.0271	0.0966
643.4	0.135945	0.136495	0.150564	0.128605	0.125829	0.125364	0.362612	0.311914	0.41102	0.134588	0.117413	0.117172			643.4	0.154447	0.129066	0.135874	0.120981	0.121949	0.119663	0.283495	0.237864	0.269516	0.141605	0.13179	0.112133			286.8	0.0715	0.0913	0.0676	0.1388	0.1164	0.1112	0.1576	0.1172	0.1711	0.1404	0.1143	0.1423			286.8	0.0569	0.0421	0.0271	0.0965
643.6	0.134873	0.13551	0.149435	0.127747	0.124879	0.124467	0.360505	0.310053	0.408819	0.133682	0.116588	0.116464			643.6	0.153281	0.12818	0.134942	0.120101	0.121092	0.11887	0.28191	0.236467	0.268047	0.140516	0.130784	0.111297			287.2	0.0718	0.0909	0.0686	0.139	0.1159	0.1129	0.1578	0.1167	0.1699	0.1399	0.1148	0.1432			287.2	0.0559	0.0429	0.0272	0.0962
643.8	0.133838	0.134387	0.14799	0.12666	0.123868	0.123351	0.35807	0.307838	0.406147	0.13264	0.1156	0.115657			643.8	0.15209	0.127096	0.133872	0.119029	0.120137	0.117877	0.279953	0.234794	0.265795	0.139334	0.129608	0.110538			287.6	0.0724	0.0913	0.0687	0.1383	0.1167	0.1122	0.1571	0.1169	0.1703	0.1407	0.1137	0.1422			287.6	0.057	0.0423	0.0273	0.0959
644	0.133108	0.133586	0.147136	0.125929	0.123248	0.12265	0.356402	0.30658	0.404118	0.131965	0.114865	0.114894			644	0.151182	0.1263	0.133142	0.118331	0.119439	0.117246	0.278616	0.233796	0.264546	0.138432	0.12889	0.109944			288	0.0725	0.091	0.0685	0.1386	0.1157	0.1127	0.1574	0.1165	0.1712	0.139	0.1145	0.1426			288	0.0576	0.0427	0.0279	0.0961
644.2	0.132137	0.132613	0.146142	0.125005	0.122476	0.121747	0.354317	0.304812	0.401664	0.13112	0.114029	0.114035			644.2	0.150068	0.125327	0.132157	0.117455	0.118524	0.116512	0.277063	0.232388	0.263184	0.137341	0.12783	0.109294			288.4	0.072	0.0922	0.0693	0.1391	0.116	0.1121	0.1579	0.1175	0.1706	0.1379	0.1145	0.142			288.4	0.0572	0.0436	0.028	0.0969
644.4	0.130894	0.131485	0.144904	0.123979	0.121442	0.120731	0.351994	0.302557	0.398992	0.129851	0.113204	0.113075			644.4	0.148701	0.124334	0.131087	0.116514	0.117447	0.115597	0.274925	0.230728	0.261652	0.136284	0.126881	0.108479			288.8	0.0734	0.092	0.0678	0.1393	0.1156	0.1129	0.1581	0.1171	0.1696	0.139	0.1147	0.1423			288.8	0.0572	0.0426	0.0277	0.0962
644.6	0.130312	0.130913	0.144252	0.123437	0.120921	0.120145	0.350778	0.301283	0.397607	0.129342	0.112759	0.112419			644.6	0.148065	0.123806	0.130396	0.116001	0.116972	0.115123	0.273916	0.229985	0.26054	0.135755	0.126377	0.108068			289.2	0.0715	0.0924	0.0692	0.1387	0.1167	0.113	0.1575	0.1177	0.171	0.1395	0.1145	0.1426			289.2	0.0574	0.0432	0.0275	0.096
644.8	0.129209	0.12974	0.142887	0.122337	0.119867	0.119174	0.34832	0.299241	0.394777	0.128307	0.111536	0.111438			644.8	0.146764	0.122625	0.129219	0.114916	0.11591	0.114005	0.272089	0.228275	0.258745	0.134573	0.125143	0.107177			289.6	0.0733	0.0921	0.0685	0.1393	0.1169	0.1124	0.1581	0.1175	0.1717	0.1398	0.1139	0.1421			289.6	0.0556	0.0427	0.0278	0.0975
645	0.128425	0.12895	0.142065	0.121588	0.119225	0.118563	0.346741	0.29795	0.393167	0.127485	0.110929	0.110888			645	0.145848	0.121905	0.128592	0.114278	0.115296	0.113322	0.270853	0.227142	0.257457	0.133717	0.124523	0.106539			290	0.0718	0.0916	0.0687	0.1379	0.1167	0.1129	0.1567	0.1169	0.1714	0.1395	0.114	0.143			290	0.057	0.0425	0.0284	0.096
645.2	0.127462	0.128025	0.141076	0.120754	0.11841	0.117762	0.344666	0.296118	0.390931	0.126557	0.110101	0.109955			645.2	0.144713	0.121002	0.127738	0.113481	0.114494	0.112469	0.269268	0.225819	0.255811	0.132643	0.12365	0.105849			290.4	0.0728	0.0921	0.0685	0.1399	0.1165	0.1128	0.1587	0.1167	0.1703	0.1398	0.1146	0.143			290.4	0.0579	0.0427	0.0281	0.097
645.4	0.126244	0.126901	0.139857	0.11977	0.117467	0.116695	0.342089	0.294094	0.388327	0.125564	0.109092	0.109011			645.4	0.143435	0.120062	0.126719	0.112483	0.113517	0.111555	0.267003	0.224366	0.253889	0.131597	0.122732	0.104682			290.8	0.0722	0.0916	0.0688	0.1388	0.1159	0.1126	0.1576	0.1172	0.1703	0.1395	0.1135	0.1431			290.8	0.0575	0.0427	0.0275	0.0967
645.6	0.125537	0.12619	0.139109	0.119136	0.116831	0.116032	0.340519	0.292627	0.386589	0.124855	0.108357	0.108399			645.6	0.142559	0.119387	0.125985	0.111825	0.11287	0.110958	0.265885	0.223177	0.252714	0.130695	0.121989	0.104087			291.2	0.072	0.093	0.0687	0.1392	0.1161	0.1132	0.158	0.1179	0.1703	0.1397	0.115	0.1425			291.2	0.0577	0.0436	0.0273	0.0968
645.8	0.124589	0.12534	0.138161	0.118328	0.115963	0.115287	0.338457	0.290829	0.384431	0.124	0.107608	0.107482			645.8	0.141496	0.11859	0.124985	0.110982	0.111995	0.110214	0.264412	0.22163	0.251254	0.129733	0.121069	0.10311			291.6	0.0723	0.0923	0.0686	0.1387	0.1163	0.1133	0.1575	0.1177	0.1704	0.1392	0.1151	0.1426			291.6	0.0567	0.043	0.0271	0.0962
646	0.12353	0.124252	0.136911	0.117429	0.114982	0.114229	0.336162	0.28875	0.381946	0.123168	0.106404	0.106482			646	0.140236	0.117542	0.123891	0.110058	0.111001	0.109284	0.2624	0.220382	0.24955	0.128743	0.119816	0.102195			292	0.072	0.0927	0.0695	0.139	0.1167	0.1133	0.1578	0.1165	0.1703	0.1398	0.1137	0.1439			292	0.0575	0.0423	0.0271	0.0964
646.2	0.123029	0.123721	0.136343	0.116923	0.114517	0.113704	0.335021	0.287723	0.380733	0.122727	0.105986	0.10604			646.2	0.139577	0.117043	0.123305	0.109547	0.110531	0.10886	0.261362	0.219442	0.248752	0.128208	0.119239	0.10174			292.4	0.0727	0.0925	0.0686	0.1386	0.1172	0.1134	0.1574	0.1173	0.171	0.1395	0.115	0.1424			292.4	0.0577	0.0421	0.027	0.0971
646.4	0.121953	0.122709	0.135181	0.115931	0.113538	0.112832	0.332533	0.285662	0.378015	0.1218	0.105084	0.104978			646.4	0.13841	0.116072	0.122223	0.108532	0.109637	0.107869	0.259177	0.217715	0.247022	0.127341	0.118138	0.101011			292.8	0.0726	0.0921	0.0684	0.1381	0.1165	0.1139	0.1569	0.1166	0.1718	0.1389	0.1133	0.143			292.8	0.0574	0.0433	0.0283	0.0973
646.6	0.121228	0.121986	0.134376	0.115272	0.1129	0.112143	0.330932	0.284091	0.376084	0.12118	0.104535	0.104204			646.6	0.137547	0.115399	0.121516	0.107867	0.108972	0.107219	0.257868	0.216462	0.245776	0.126726	0.117623	0.100408			293.2	0.0728	0.0927	0.0691	0.1391	0.1162	0.114	0.1579	0.1173	0.1716	0.1392	0.1145	0.1421			293.2	0.057	0.043	0.0286	0.0963
646.8	0.120396	0.121102	0.133415	0.114404	0.112161	0.111311	0.328861	0.282385	0.373806	0.120298	0.103793	0.103455			646.8	0.136438	0.114509	0.120591	0.107051	0.108201	0.106484	0.256272	0.215254	0.244169	0.125999	0.116829	0.0997022			293.6	0.0732	0.0931	0.069	0.1398	0.1157	0.1135	0.1586	0.1173	0.1709	0.1393	0.1143	0.1421			293.6	0.0571	0.0436	0.0274	0.0969
647	0.119258	0.11994	0.132317	0.113411	0.111167	0.110317	0.326378	0.280141	0.371165	0.119229	0.102925	0.102381			647	0.135178	0.113619	0.119535	0.106175	0.107152	0.10554	0.254203	0.213612	0.242565	0.124828	0.115864	0.0988062			294	0.0726	0.0927	0.0693	0.1381	0.1165	0.1137	0.1569	0.1172	0.1714	0.1397	0.1147	0.1431			294	0.0568	0.0448	0.028	0.0985
647.2	0.118598	0.119224	0.131566	0.112799	0.110481	0.109721	0.324696	0.27883	0.369518	0.118549	0.102307	0.101708			647.2	0.134479	0.112979	0.118889	0.105556	0.106526	0.104886	0.252864	0.212572	0.241477	0.12419	0.115244	0.0981121			294.4	0.0727	0.0936	0.0691	0.1391	0.1165	0.1132	0.1579	0.1176	0.1704	0.1404	0.1135	0.1423			294.4	0.0576	0.0423	0.0269	0.097
647.4	0.117798	0.118363	0.130637	0.112076	0.109675	0.108959	0.322754	0.27716	0.367138	0.117684	0.101581	0.100931			647.4	0.133561	0.11222	0.11815	0.104768	0.105768	0.104085	0.25119	0.211224	0.239638	0.123314	0.114561	0.0972021			294.8	0.0739	0.0927	0.0697	0.1387	0.1165	0.1136	0.1575	0.1173	0.1714	0.1401	0.1136	0.1428			294.8	0.0575	0.0437	0.0284	0.0969
647.6	0.11683	0.117258	0.129441	0.111112	0.108801	0.108052	0.320348	0.275217	0.36422	0.116745	0.100629	0.0999534			647.6	0.132439	0.111114	0.117101	0.103807	0.104844	0.103231	0.249574	0.209635	0.237797	0.122199	0.11368	0.0961947			295.2	0.0736	0.0924	0.0687	0.1388	0.117	0.114	0.1576	0.1169	0.1711	0.1393	0.1144	0.1426			295.2	0.0579	0.0433	0.0277	0.0964
647.8	0.116167	0.116667	0.128724	0.110498	0.1082	0.107467	0.318923	0.273854	0.36229	0.116091	0.0999655	0.0993767			647.8	0.131668	0.110503	0.116442	0.103264	0.104292	0.102721	0.24833	0.208564	0.236658	0.121416	0.113021	0.0957513			295.6	0.0735	0.0927	0.0695	0.1386	0.1176	0.1146	0.1574	0.1175	0.1712	0.1388	0.1143	0.1418			295.6	0.0578	0.0436	0.0283	0.097
648	0.115312	0.115825	0.127844	0.109861	0.107409	0.106704	0.316855	0.271995	0.359948	0.115196	0.0993957	0.0986403			648	0.130718	0.109743	0.115652	0.102636	0.103558	0.101968	0.24665	0.207214	0.235098	0.12046	0.11224	0.0950456			296	0.0733	0.0928	0.0691	0.1388	0.1167	0.1143	0.1576	0.1173	0.1707	0.139	0.1149	0.1432			296	0.0572	0.0435	0.0279	0.0972
648.2	0.114442	0.114929	0.126721	0.109015	0.106453	0.10577	0.314372	0.269803	0.357036	0.11432	0.0986276	0.0977628			648.2	0.129612	0.10887	0.114727	0.101767	0.102711	0.10115	0.244497	0.205612	0.233333	0.119546	0.111334	0.0940938			296.4	0.0731	0.0937	0.0697	0.1407	0.1172	0.1148	0.1595	0.1177	0.1701	0.1389	0.1146	0.1428			296.4	0.0579	0.0431	0.0282	0.0975
648.4	0.114021	0.114459	0.126161	0.10851	0.106035	0.105364	0.313277	0.268909	0.355729	0.11384	0.09819	0.0973541			648.4	0.129076	0.108381	0.114161	0.101287	0.102279	0.100718	0.243548	0.204886	0.232386	0.119088	0.110847	0.093741			296.8	0.0732	0.0941	0.0703	0.139	0.1172	0.1136	0.1578	0.1176	0.1705	0.1399	0.1144	0.1426			296.8	0.0587	0.0436	0.0277	0.0973
648.6	0.113097	0.113584	0.12499	0.107534	0.105111	0.104469	0.311101	0.2669	0.352876	0.112972	0.0972955	0.096516			648.6	0.128004	0.107423	0.113115	0.100393	0.101349	0.0998514	0.241695	0.203279	0.230801	0.118001	0.109642	0.0932326			297.2	0.0735	0.0928	0.0691	0.1391	0.1165	0.1151	0.1579	0.1161	0.1707	0.1399	0.1142	0.143			297.2	0.058	0.0434	0.028	0.0973
648.8	0.112474	0.11288	0.124236	0.106935	0.104499	0.103883	0.30952	0.265692	0.35115	0.112242	0.0967938	0.0958771			648.8	0.127254	0.106857	0.112495	0.0998218	0.100739	0.0992183	0.24036	0.202333	0.229677	0.117287	0.109079	0.0926058			297.6	0.0739	0.0936	0.0695	0.1386	0.1161	0.1148	0.1574	0.1176	0.1714	0.1389	0.1142	0.1432			297.6	0.0584	0.0436	0.0285	0.0966
649	0.111744	0.112048	0.123281	0.106192	0.103725	0.103099	0.307642	0.264213	0.348953	0.111336	0.0961093	0.095151			649	0.126384	0.106051	0.111694	0.0991818	0.100076	0.0984735	0.23871	0.201157	0.228224	0.116269	0.108416	0.0920185			298	0.0737	0.0945	0.0688	0.1389	0.1167	0.1152	0.1577	0.117	0.1711	0.1384	0.1144	0.1422			298	0.0579	0.0432	0.0283	0.0977
649.2	0.11077	0.111077	0.122312	0.10515	0.102846	0.102228	0.305097	0.262198	0.346265	0.110337	0.0953995	0.094344			649.2	0.12536	0.105081	0.11074	0.0982905	0.0992301	0.0976366	0.237038	0.199323	0.226253	0.115264	0.107586	0.0911248			298.4	0.0735	0.0932	0.0697	0.1388	0.1164	0.1147	0.1576	0.117	0.1716	0.1389	0.1143	0.1419			298.4	0.0574	0.0435	0.0284	0.0975
649.4	0.110129	0.110399	0.121619	0.104535	0.102225	0.101683	0.303398	0.260821	0.34457	0.109757	0.0947792	0.0936657			649.4	0.124639	0.104478	0.110087	0.0977805	0.0986483	0.0970849	0.235826	0.198295	0.225127	0.114585	0.107007	0.0905723			298.8	0.0732	0.0942	0.0702	0.1391	0.117	0.1145	0.1579	0.117	0.1704	0.1392	0.114	0.1422			298.8	0.0587	0.0437	0.0273	0.097
649.6	0.109287	0.109568	0.120745	0.103821	0.101464	0.100885	0.301516	0.25919	0.342417	0.108901	0.0939683	0.0929458			649.6	0.123719	0.103694	0.109348	0.0970844	0.0979345	0.0963912	0.234538	0.197053	0.223728	0.113672	0.106333	0.0898713			299.2	0.073	0.095	0.0706	0.1399	0.1164	0.1142	0.1587	0.1168	0.171	0.1403	0.1131	0.1418			299.2	0.0586	0.0438	0.0286	0.0973
649.8	0.108363	0.108712	0.11973	0.10294	0.100596	0.100103	0.299148	0.257313	0.339944	0.107982	0.0932468	0.0923317			649.8	0.122688	0.102863	0.108532	0.0962094	0.0970807	0.0954976	0.232791	0.195686	0.222021	0.112952	0.105177	0.0891261			299.6	0.0737	0.0938	0.0697	0.1393	0.1176	0.1142	0.1581	0.1164	0.1707	0.1402	0.1142	0.1427			299.6	0.0581	0.0435	0.0279	0.0973
650	0.107768	0.108139	0.119065	0.102353	0.100046	0.0995761	0.297701	0.255991	0.338295	0.107347	0.0928268	0.0919708			650	0.122004	0.102298	0.107913	0.095668	0.0965982	0.0949214	0.231492	0.19448	0.220842	0.112367	0.104567	0.088764			300	0.0738	0.094	0.0699	0.1391	0.117	0.1152	0.1579	0.1167	0.1716	0.1399	0.1143	0.1422			300	0.0584	0.0439	0.0281	0.0967
																														300.4	0.0735	0.0941	0.0693	0.1388	0.1172	0.1147	0.1576	0.1161	0.1707	0.1388	0.1137	0.142			300.4	0.0589	0.0433	0.0288	0.0978
																														300.8	0.0737	0.0943	0.0697	0.1384	0.1163	0.1144	0.1572	0.1179	0.1711	0.1391	0.115	0.1419			300.8	0.0579	0.0443	0.0281	0.0979
																														301.2	0.0742	0.0941	0.0704	0.139	0.117	0.1139	0.1578	0.1167	0.1706	0.1393	0.114	0.1423			301.2	0.0583	0.0438	0.0284	0.0971
																														301.6	0.0751	0.0944	0.07	0.1396	0.1171	0.1141	0.1584	0.1175	0.172	0.1406	0.1144	0.1423			301.6	0.0582	0.0443	0.0284	0.0978
																														302	0.0744	0.0948	0.0706	0.1399	0.1176	0.1153	0.1587	0.1168	0.1712	0.1391	0.1139	0.1422			302	0.0584	0.0445	0.0285	0.0972
																														302.4	0.0749	0.0937	0.0699	0.1391	0.1172	0.115	0.1579	0.1171	0.1714	0.1396	0.1146	0.1428			302.4	0.0581	0.0438	0.029	0.0988
																														302.8	0.0739	0.0949	0.0713	0.1387	0.1163	0.1153	0.1575	0.1174	0.1714	0.139	0.1142	0.1418			302.8	0.0593	0.0439	0.0282	0.0976
																														303.2	0.075	0.0941	0.0704	0.139	0.1165	0.115	0.1578	0.117	0.1707	0.1398	0.1151	0.1421			303.2	0.0599	0.0438	0.029	0.0982
																														303.6	0.0745	0.0949	0.07	0.1388	0.117	0.1149	0.1576	0.1165	0.1703	0.1393	0.1135	0.1416			303.6	0.0591	0.0445	0.0283	0.097
																														304	0.0749	0.0948	0.0707	0.1391	0.1172	0.116	0.1579	0.1164	0.1716	0.1397	0.1133	0.1421			304	0.0593	0.044	0.0291	0.0973
																														304.4	0.0742	0.0957	0.0707	0.1391	0.1172	0.115	0.1579	0.1171	0.1705	0.1394	0.1134	0.143			304.4	0.0588	0.0445	0.0276	0.0977
																														304.8	0.0749	0.0944	0.0705	0.1392	0.117	0.116	0.158	0.1167	0.1703	0.1401	0.1142	0.1427			304.8	0.0586	0.0438	0.0287	0.0991
																														305.2	0.0745	0.0945	0.0705	0.1392	0.1171	0.1157	0.158	0.117	0.1711	0.1389	0.1141	0.1435			305.2	0.0588	0.0441	0.0284	0.098
																														305.6	0.0749	0.0944	0.0706	0.1397	0.1165	0.1158	0.1585	0.1168	0.1716	0.1386	0.1152	0.1422			305.6	0.0598	0.0442	0.0295	0.0988
																														306	0.0746	0.0949	0.0704	0.1397	0.1164	0.1156	0.1585	0.1177	0.1709	0.1394	0.1132	0.1426			306	0.0595	0.0449	0.0285	0.0989
																														306.4	0.0748	0.0951	0.0712	0.1394	0.1178	0.116	0.1582	0.117	0.1715	0.139	0.1135	0.1435			306.4	0.0593	0.0443	0.0287	0.0979
																														306.8	0.074	0.0956	0.0709	0.1394	0.117	0.1163	0.1582	0.1172	0.1713	0.139	0.1135	0.1428			306.8	0.0589	0.0446	0.0279	0.0986
																														307.2	0.0751	0.095	0.0707	0.1384	0.1174	0.1163	0.1572	0.1178	0.1711	0.139	0.1144	0.1414			307.2	0.0593	0.0445	0.0296	0.099
																														307.6	0.0748	0.0957	0.0716	0.1392	0.1175	0.1156	0.158	0.1166	0.1712	0.1406	0.1141	0.1422			307.6	0.0595	0.044	0.0289	0.0985
																														308	0.0752	0.0953	0.0713	0.1388	0.1175	0.1158	0.1576	0.1168	0.1703	0.1397	0.1141	0.1431			308	0.0586	0.0453	0.0296	0.0979
																														308.4	0.0748	0.0945	0.0712	0.1386	0.1164	0.1155	0.1574	0.1166	0.1706	0.1396	0.1151	0.1423			308.4	0.0593	0.0451	0.0296	0.098
																														308.8	0.0753	0.0954	0.0724	0.1388	0.1169	0.1158	0.1576	0.1163	0.1711	0.1402	0.1135	0.1432			308.8	0.0596	0.0456	0.0294	0.0986
																														309.2	0.0747	0.0965	0.0709	0.1393	0.1176	0.1167	0.1581	0.1169	0.1716	0.1399	0.1142	0.1427			309.2	0.0592	0.0451	0.0291	0.0985
																														309.6	0.0756	0.0965	0.0717	0.1391	0.1176	0.1166	0.1579	0.1177	0.1707	0.1393	0.1147	0.1431			309.6	0.0605	0.0447	0.0292	0.0982
																														310	0.0767	0.0955	0.071	0.1393	0.118	0.1161	0.1581	0.1173	0.1708	0.1399	0.1149	0.1435			310	0.0597	0.0446	0.0287	0.0983
																														310.4	0.0764	0.0952	0.072	0.1391	0.117	0.1159	0.1579	0.1175	0.1715	0.1397	0.1143	0.1436			310.4	0.0604	0.0442	0.0287	0.0979
																														310.8	0.0752	0.0956	0.0721	0.1397	0.1171	0.1157	0.1585	0.1169	0.1711	0.1385	0.1142	0.1423			310.8	0.0601	0.0454	0.0297	0.0975
																														311.2	0.0755	0.0961	0.0712	0.1387	0.1175	0.1162	0.1575	0.1171	0.1727	0.1389	0.1142	0.143			311.2	0.0596	0.0453	0.0289	0.0982
																														311.6	0.0758	0.0954	0.072	0.1394	0.1171	0.1163	0.1582	0.1178	0.1709	0.139	0.1145	0.142			311.6	0.0594	0.0463	0.0293	0.0994
																														312	0.0757	0.0972	0.0714	0.1385	0.1179	0.1163	0.1573	0.117	0.1717	0.1404	0.1142	0.1429			312	0.0602	0.0446	0.03	0.0985
																														312.4	0.0758	0.095	0.0716	0.1393	0.117	0.116	0.1581	0.1171	0.1712	0.1397	0.1147	0.1426			312.4	0.0595	0.0451	0.0293	0.0986
																														312.8	0.0757	0.0969	0.0718	0.1385	0.1172	0.1175	0.1573	0.1178	0.172	0.1392	0.1143	0.1425			312.8	0.0604	0.0447	0.0297	0.099
																														313.2	0.0747	0.0957	0.0719	0.1393	0.1177	0.1171	0.1581	0.1161	0.1713	0.1396	0.1143	0.1425			313.2	0.0603	0.0451	0.0295	0.0988
																														313.6	0.0757	0.0965	0.0717	0.1385	0.1168	0.117	0.1573	0.1165	0.1708	0.1397	0.1137	0.1429			313.6	0.0601	0.0457	0.0291	0.0988
																														314	0.0768	0.0963	0.0717	0.1402	0.1171	0.1163	0.159	0.1181	0.1708	0.1402	0.1148	0.142			314	0.0595	0.0455	0.0292	0.099
																														314.4	0.0754	0.0963	0.0721	0.1385	0.1179	0.1165	0.1573	0.1174	0.1712	0.1406	0.115	0.1429			314.4	0.0595	0.0451	0.0292	0.0994
																														314.8	0.0765	0.0968	0.0724	0.1381	0.1177	0.1166	0.1569	0.1173	0.1712	0.1387	0.1143	0.1413			314.8	0.06	0.045	0.0292	0.0993
																														315.2	0.0759	0.0966	0.0725	0.1391	0.1181	0.1165	0.1579	0.1165	0.1706	0.1398	0.1142	0.1423			315.2	0.0606	0.0447	0.0297	0.0975
																														315.6	0.0762	0.0965	0.0723	0.139	0.1175	0.1172	0.1578	0.1171	0.1716	0.1383	0.1143	0.1427			315.6	0.0603	0.0456	0.03	0.0999
																														316	0.0756	0.097	0.072	0.1382	0.1179	0.1179	0.157	0.1172	0.1711	0.1394	0.114	0.1419			316	0.061	0.0449	0.0302	0.0985
																														316.4	0.0768	0.0972	0.0715	0.1396	0.117	0.1185	0.1584	0.117	0.171	0.1395	0.1158	0.1431			316.4	0.0599	0.0458	0.0292	0.0994
																														316.8	0.0771	0.0977	0.0727	0.1379	0.1175	0.117	0.1567	0.117	0.1708	0.1395	0.1139	0.1427			316.8	0.0599	0.0456	0.0289	0.0994
																														317.2	0.077	0.0969	0.0718	0.1395	0.1184	0.1164	0.1583	0.1171	0.1729	0.1396	0.1139	0.1433			317.2	0.0595	0.0446	0.0291	0.0999
																														317.6	0.0761	0.0965	0.0734	0.139	0.1177	0.1166	0.1578	0.1168	0.1716	0.1394	0.1139	0.1423			317.6	0.0609	0.0446	0.0292	0.0999
																														318	0.0761	0.097	0.0726	0.1395	0.1176	0.1177	0.1583	0.1171	0.1713	0.139	0.1137	0.1428			318	0.0605	0.0456	0.03	0.0987
																														318.4	0.077	0.0961	0.0734	0.139	0.1174	0.1168	0.1578	0.1178	0.1704	0.1394	0.1148	0.1436			318.4	0.0611	0.046	0.0295	0.0987
																														318.8	0.0771	0.098	0.0724	0.1392	0.1171	0.118	0.158	0.1165	0.1711	0.1407	0.1147	0.1418			318.8	0.0604	0.0456	0.0297	0.0996
																														319.2	0.077	0.0968	0.0731	0.139	0.1185	0.1171	0.1578	0.1172	0.1717	0.1392	0.1151	0.1426			319.2	0.0603	0.0452	0.0284	0.0991
																														319.6	0.0767	0.0973	0.0729	0.1394	0.1177	0.1174	0.1582	0.1176	0.1723	0.1399	0.1149	0.1426			319.6	0.06	0.0455	0.0299	0.0994
																														320	0.0773	0.0978	0.0734	0.1389	0.1181	0.1178	0.1577	0.1173	0.1719	0.1381	0.1143	0.1421			320	0.0608	0.0453	0.03	0.099
																														320.4	0.0768	0.0956	0.0731	0.1391	0.1176	0.118	0.1579	0.1166	0.1721	0.1397	0.114	0.143			320.4	0.0602	0.0461	0.0303	0.0989
																														320.8	0.0772	0.0979	0.073	0.1395	0.1182	0.1181	0.1583	0.1163	0.1716	0.1394	0.1139	0.1427			320.8	0.0604	0.0459	0.0289	0.0994
																														321.2	0.0763	0.0976	0.0728	0.14	0.1175	0.1185	0.1588	0.117	0.1719	0.1399	0.1142	0.1424			321.2	0.0605	0.0457	0.0293	0.1
																														321.6	0.0781	0.0986	0.072	0.1393	0.1166	0.1181	0.1581	0.1173	0.1715	0.1389	0.1138	0.1432			321.6	0.0609	0.0457	0.0299	0.1006
																														322	0.0776	0.0984	0.0737	0.1395	0.1179	0.1176	0.1583	0.1169	0.1719	0.1392	0.1142	0.1421			322	0.0613	0.0458	0.0296	0.0998
																														322.4	0.077	0.0987	0.0738	0.1388	0.1174	0.1182	0.1576	0.1162	0.1715	0.1392	0.1145	0.1427			322.4	0.0611	0.0458	0.0296	0.1005
																														322.8	0.0771	0.0968	0.0732	0.1383	0.1176	0.1186	0.1571	0.1163	0.1709	0.1393	0.1147	0.1423			322.8	0.0611	0.0462	0.0304	0.0997
																														323.2	0.0777	0.0979	0.0743	0.1388	0.1184	0.1191	0.1576	0.1173	0.1706	0.1385	0.1142	0.1426			323.2	0.0612	0.0464	0.0302	0.101
																														323.6	0.0773	0.0987	0.0731	0.1388	0.1176	0.119	0.1576	0.1159	0.1717	0.1403	0.114	0.1428			323.6	0.0602	0.0463	0.0303	0.1004
																														324	0.0767	0.0982	0.0739	0.1393	0.1171	0.1186	0.1581	0.1174	0.172	0.1397	0.1147	0.1428			324	0.0609	0.0456	0.0302	0.1008
																														324.4	0.0773	0.0979	0.0733	0.1395	0.1182	0.1189	0.1583	0.1167	0.172	0.1387	0.1139	0.1426			324.4	0.0603	0.0456	0.0295	0.1005
																														324.8	0.0769	0.0983	0.0745	0.1383	0.1177	0.1188	0.1571	0.1175	0.1707	0.1391	0.1147	0.1418			324.8	0.0616	0.046	0.0296	0.0992
																														325.2	0.0776	0.0979	0.0734	0.1394	0.1184	0.1189	0.1582	0.1164	0.1709	0.1384	0.1129	0.1421			325.2	0.0609	0.0463	0.0296	0.0996
																														325.6	0.0776	0.0983	0.0734	0.1384	0.1179	0.1178	0.1572	0.1169	0.1723	0.1385	0.1148	0.1422			325.6	0.0611	0.0458	0.0297	0.0999
																														326	0.0775	0.0981	0.0731	0.1394	0.1182	0.1184	0.1582	0.1172	0.1715	0.1399	0.1147	0.1426			326	0.0615	0.0457	0.0298	0.1007
																														326.4	0.0778	0.099	0.0737	0.1387	0.1177	0.1181	0.1575	0.1176	0.1718	0.1399	0.1147	0.1422			326.4	0.0609	0.046	0.03	0.1003
																														326.8	0.0776	0.0983	0.0733	0.1392	0.1183	0.1194	0.158	0.1175	0.172	0.1394	0.1134	0.1429			326.8	0.0613	0.0458	0.0303	0.1003
																														327.2	0.0775	0.0992	0.0735	0.138	0.1172	0.1196	0.1568	0.1159	0.1708	0.1397	0.1136	0.1433			327.2	0.0611	0.0466	0.0305	0.1004
																														327.6	0.0773	0.0993	0.0741	0.1387	0.1176	0.1187	0.1575	0.1173	0.1714	0.1391	0.1141	0.1429			327.6	0.0616	0.0465	0.0308	0.1009
																														328	0.0782	0.0995	0.0743	0.1397	0.1182	0.1185	0.1585	0.1165	0.1719	0.1404	0.1144	0.1432			328	0.0618	0.0467	0.0308	0.1
																														328.4	0.0782	0.0989	0.0739	0.1395	0.1183	0.119	0.1583	0.116	0.1719	0.1381	0.1151	0.1422			328.4	0.0609	0.0468	0.0302	0.1022
																														328.8	0.078	0.0992	0.0751	0.1396	0.1185	0.1193	0.1584	0.1162	0.1702	0.1399	0.1142	0.1426			328.8	0.062	0.0466	0.0299	0.1001
																														329.2	0.0778	0.0987	0.0741	0.1381	0.117	0.119	0.1569	0.1174	0.1725	0.1384	0.1142	0.1421			329.2	0.0623	0.0463	0.0299	0.1011
																														329.6	0.0788	0.0994	0.0739	0.1394	0.1186	0.1189	0.1582	0.1163	0.1706	0.1398	0.1146	0.1428			329.6	0.0619	0.0465	0.0292	0.1004
																														330	0.0783	0.0999	0.0745	0.1402	0.1194	0.1187	0.159	0.1168	0.1713	0.1394	0.1145	0.1425			330	0.0619	0.0464	0.0301	0.101
																														330.4	0.0782	0.0993	0.0743	0.1386	0.1188	0.1191	0.1574	0.1162	0.1708	0.138	0.1147	0.1424			330.4	0.0612	0.0465	0.0306	0.1008
																														330.8	0.0784	0.099	0.0739	0.1393	0.1176	0.1188	0.1581	0.1173	0.1718	0.1392	0.1153	0.1423			330.8	0.0618	0.0467	0.0315	0.1009
																														331.2	0.0786	0.0993	0.0749	0.139	0.1173	0.1194	0.1578	0.117	0.1712	0.1393	0.1154	0.1422			331.2	0.062	0.0467	0.0301	0.1002
																														331.6	0.079	0.099	0.0743	0.1388	0.1177	0.1195	0.1576	0.1174	0.1718	0.1385	0.1139	0.1426			331.6	0.0615	0.0471	0.0303	0.1
																														332	0.0786	0.099	0.0743	0.1392	0.1179	0.1198	0.158	0.1169	0.1708	0.1403	0.1145	0.143			332	0.0623	0.0456	0.0301	0.1007
																														332.4	0.0781	0.0986	0.0745	0.1394	0.1183	0.1195	0.1582	0.1175	0.1711	0.1391	0.1148	0.1423			332.4	0.0613	0.046	0.0301	0.1005
																														332.8	0.0784	0.0994	0.0748	0.1387	0.1182	0.1195	0.1575	0.1173	0.1715	0.1384	0.1147	0.1422			332.8	0.0616	0.047	0.0314	0.1014
																														333.2	0.0794	0.0993	0.0738	0.1387	0.1185	0.1203	0.1575	0.1164	0.1715	0.1391	0.1146	0.1427			333.2	0.0618	0.0467	0.0302	0.1008
																														333.6	0.0792	0.0999	0.0743	0.1394	0.1165	0.1202	0.1582	0.1172	0.1719	0.1384	0.1148	0.1422			333.6	0.0615	0.0473	0.0309	0.1015
																														334	0.0789	0.0996	0.0749	0.1394	0.1181	0.1202	0.1582	0.1173	0.1707	0.1388	0.1139	0.1423			334	0.0616	0.048	0.0298	0.1005
																														334.4	0.0786	0.1001	0.0749	0.138	0.1184	0.1199	0.1568	0.1176	0.1714	0.1381	0.1139	0.1428			334.4	0.0625	0.0466	0.0297	0.1013
																														334.8	0.0788	0.0993	0.0749	0.14	0.1183	0.1204	0.1588	0.1157	0.172	0.139	0.1135	0.1436			334.8	0.0633	0.047	0.0308	0.1017
																														335.2	0.0785	0.0999	0.0743	0.1385	0.1183	0.1198	0.1573	0.117	0.1715	0.1403	0.1147	0.1428			335.2	0.0622	0.0469	0.0313	0.1017
																														335.6	0.0788	0.0998	0.0749	0.1399	0.1181	0.1202	0.1587	0.1167	0.1715	0.1393	0.1152	0.1424			335.6	0.062	0.0471	0.0309	0.1013
																														336	0.079	0.1003	0.076	0.1396	0.1175	0.1207	0.1584	0.1174	0.1714	0.1393	0.1145	0.142			336	0.0615	0.0477	0.0305	0.1022
																														336.4	0.0796	0.0998	0.0759	0.138	0.1185	0.1203	0.1568	0.1173	0.1709	0.139	0.1149	0.1423			336.4	0.0629	0.0472	0.0313	0.1008
																														336.8	0.0796	0.0993	0.0746	0.1398	0.1186	0.1204	0.1586	0.1166	0.1713	0.1395	0.1145	0.1425			336.8	0.0622	0.0473	0.0307	0.1007
																														337.2	0.0792	0.1005	0.0753	0.1387	0.1193	0.1201	0.1575	0.1162	0.172	0.1399	0.1149	0.1433			337.2	0.0628	0.0474	0.0303	0.1018
																														337.6	0.0797	0.1003	0.075	0.1391	0.1187	0.1205	0.1579	0.1155	0.1714	0.1394	0.1142	0.1427			337.6	0.0624	0.0478	0.0309	0.1012
																														338	0.0795	0.0998	0.0749	0.1398	0.1174	0.1203	0.1586	0.1175	0.1717	0.138	0.1153	0.1428			338	0.063	0.0467	0.0305	0.1018
																														338.4	0.0788	0.0997	0.0763	0.1402	0.1191	0.1209	0.159	0.1173	0.1714	0.1395	0.1151	0.1423			338.4	0.0614	0.0476	0.031	0.1008
																														338.8	0.0792	0.1003	0.0756	0.1398	0.1186	0.1193	0.1586	0.116	0.1715	0.1396	0.1147	0.142			338.8	0.0617	0.0474	0.0306	0.1021
																														339.2	0.0788	0.0997	0.076	0.1391	0.1186	0.1214	0.1579	0.1168	0.1714	0.1386	0.1141	0.1427			339.2	0.0631	0.0474	0.0303	0.102
																														339.6	0.0796	0.1003	0.0752	0.1391	0.1184	0.1202	0.1579	0.1167	0.1723	0.1403	0.1135	0.1429			339.6	0.0621	0.0467	0.0307	0.1016
																														340	0.0799	0.1011	0.0754	0.1386	0.1183	0.1201	0.1574	0.1166	0.1712	0.1381	0.1155	0.1427			340	0.0617	0.0471	0.0305	0.1021
																														340.4	0.0796	0.1015	0.0762	0.1392	0.118	0.12	0.158	0.1166	0.1709	0.139	0.1146	0.1437			340.4	0.0624	0.0485	0.0314	0.1018
																														340.8	0.08	0.1011	0.0759	0.139	0.118	0.1207	0.1578	0.1177	0.1717	0.1386	0.1154	0.1431			340.8	0.062	0.0487	0.0304	0.1014
																														341.2	0.0801	0.1004	0.0755	0.1402	0.118	0.1209	0.159	0.1168	0.1716	0.1391	0.1145	0.1419			341.2	0.0626	0.0477	0.031	0.1021
																														341.6	0.0793	0.1	0.0758	0.1394	0.118	0.1205	0.1582	0.1175	0.1706	0.1386	0.1144	0.1429			341.6	0.0619	0.0479	0.0313	0.1014
																														342	0.0802	0.1005	0.0755	0.1383	0.1178	0.1207	0.1571	0.1168	0.1718	0.1385	0.1142	0.1427			342	0.0627	0.0477	0.0316	0.1016
																														342.4	0.0794	0.1011	0.0749	0.1391	0.119	0.1213	0.1579	0.1171	0.1716	0.1388	0.1144	0.1429			342.4	0.0638	0.0475	0.031	0.1024
																														342.8	0.0799	0.1017	0.0761	0.1383	0.1173	0.1207	0.1571	0.1173	0.1725	0.1386	0.1147	0.1426			342.8	0.0624	0.0481	0.0315	0.1015
																														343.2	0.0799	0.1009	0.076	0.1393	0.1189	0.1203	0.1581	0.117	0.1716	0.1387	0.1141	0.1428			343.2	0.0629	0.0481	0.0312	0.1019
																														343.6	0.0811	0.1012	0.0766	0.1382	0.1177	0.1211	0.157	0.1165	0.172	0.1401	0.1138	0.1427			343.6	0.0635	0.0475	0.031	0.1005
																														344	0.08	0.1011	0.0765	0.1384	0.1182	0.1212	0.1572	0.1165	0.1718	0.1396	0.114	0.1431			344	0.0625	0.0479	0.031	0.102
																														344.4	0.0803	0.1008	0.0755	0.1389	0.1178	0.1208	0.1577	0.1161	0.171	0.1387	0.1144	0.1429			344.4	0.0632	0.0484	0.0308	0.1022
																														344.8	0.0789	0.1012	0.0756	0.1387	0.1187	0.1217	0.1575	0.116	0.1711	0.139	0.1145	0.1424			344.8	0.0633	0.0483	0.0313	0.1035
																														345.2	0.0803	0.1012	0.0756	0.1383	0.1176	0.1211	0.1571	0.1168	0.1704	0.1385	0.115	0.1422			345.2	0.0637	0.0487	0.0315	0.1009
																														345.6	0.0805	0.1016	0.0765	0.1401	0.1178	0.1209	0.1589	0.1166	0.171	0.1389	0.1146	0.1427			345.6	0.063	0.0483	0.0315	0.1024
																														346	0.0806	0.1014	0.076	0.1392	0.1182	0.1208	0.158	0.1166	0.1722	0.1387	0.1147	0.1417			346	0.0639	0.0477	0.0312	0.1012
																														346.4	0.0809	0.1015	0.0762	0.1396	0.1183	0.1214	0.1584	0.1168	0.1716	0.1405	0.1143	0.1431			346.4	0.0637	0.0482	0.0314	0.1015
																														346.8	0.0802	0.101	0.0767	0.1384	0.1178	0.1216	0.1572	0.1161	0.1706	0.1394	0.1147	0.1424			346.8	0.064	0.0476	0.0311	0.1023
																														347.2	0.0797	0.1015	0.0767	0.1392	0.1184	0.122	0.158	0.1163	0.1719	0.1385	0.1132	0.1422			347.2	0.0619	0.0479	0.0315	0.1021
																														347.6	0.0799	0.1025	0.0767	0.1382	0.1186	0.1209	0.157	0.1171	0.1714	0.1386	0.1152	0.1429			347.6	0.0638	0.0486	0.0303	0.1015
																														348	0.0805	0.1009	0.0771	0.1392	0.1189	0.1221	0.158	0.1167	0.1709	0.1393	0.1143	0.1422			348	0.0628	0.0478	0.0318	0.1016
																														348.4	0.0803	0.1014	0.0774	0.1394	0.1182	0.1212	0.1582	0.1164	0.1716	0.1385	0.1148	0.1431			348.4	0.0636	0.048	0.0316	0.1018
																														348.8	0.0802	0.1018	0.0761	0.1391	0.1181	0.1226	0.1579	0.1162	0.1714	0.1387	0.1138	0.1432			348.8	0.0637	0.0483	0.0312	0.1023
																														349.2	0.081	0.1023	0.0764	0.1388	0.1183	0.1216	0.1576	0.1167	0.1716	0.14	0.116	0.1429			349.2	0.0632	0.048	0.0308	0.1023
																														349.6	0.0801	0.1024	0.077	0.1393	0.1181	0.1218	0.1581	0.1159	0.1714	0.1388	0.1155	0.142			349.6	0.0631	0.0482	0.031	0.1019
																														350	0.0802	0.1025	0.0768	0.138	0.1185	0.1211	0.1568	0.1166	0.1714	0.1388	0.1145	0.1425			350	0.0634	0.0481	0.0319	0.1023
																														350.4	0.0803	0.1027	0.0772	0.1396	0.1178	0.1211	0.1584	0.1172	0.1718	0.1386	0.1138	0.1426			350.4	0.063	0.0496	0.0316	0.1024
																														350.8	0.0812	0.102	0.0766	0.1387	0.1189	0.1219	0.1575	0.1167	0.1712	0.139	0.1146	0.1438			350.8	0.0638	0.0484	0.0315	0.1022
																														351.2	0.0813	0.1024	0.0771	0.1388	0.1179	0.1223	0.1576	0.1167	0.171	0.1395	0.1145	0.1423			351.2	0.0639	0.0485	0.0319	0.1031
																														351.6	0.081	0.1028	0.0785	0.139	0.1183	0.1215	0.1578	0.1157	0.1723	0.1395	0.1147	0.142			351.6	0.0638	0.0481	0.0315	0.102
																														352	0.081	0.102	0.0765	0.1389	0.1175	0.1223	0.1577	0.116	0.171	0.1396	0.1145	0.143			352	0.0645	0.048	0.0324	0.1024
																														352.4	0.0806	0.1024	0.0773	0.1388	0.1185	0.122	0.1576	0.1164	0.1718	0.1402	0.1148	0.1425			352.4	0.0635	0.0484	0.0325	0.1029
																														352.8	0.0809	0.1027	0.0779	0.1395	0.118	0.122	0.1583	0.1168	0.172	0.1388	0.1133	0.1423			352.8	0.0626	0.0481	0.0323	0.1022
																														353.2	0.0811	0.1019	0.0773	0.1394	0.1194	0.1219	0.1582	0.117	0.1721	0.1387	0.1151	0.1433			353.2	0.0644	0.049	0.0323	0.1033
																														353.6	0.081	0.103	0.0768	0.1401	0.118	0.1228	0.1589	0.1164	0.1708	0.1389	0.1137	0.1437			353.6	0.064	0.0483	0.0315	0.1019
																														354	0.0819	0.102	0.0781	0.1388	0.1189	0.1227	0.1576	0.1165	0.1727	0.1408	0.1147	0.1444			354	0.0642	0.0485	0.0318	0.1028
																														354.4	0.0809	0.1025	0.0783	0.1404	0.1185	0.1223	0.1592	0.1171	0.1717	0.1388	0.1151	0.143			354.4	0.063	0.0489	0.032	0.1018
																														354.8	0.0808	0.1022	0.0771	0.1383	0.1192	0.1225	0.1571	0.1168	0.1716	0.1387	0.1141	0.1426			354.8	0.0647	0.049	0.0325	0.1019
																														355.2	0.0812	0.1034	0.0779	0.1389	0.1184	0.1225	0.1577	0.1173	0.172	0.1386	0.1146	0.1429			355.2	0.0631	0.0497	0.0316	0.1028
																														355.6	0.0812	0.103	0.0769	0.1387	0.1199	0.1231	0.1575	0.1174	0.1719	0.1385	0.1153	0.1435			355.6	0.0641	0.0488	0.032	0.1032
																														356	0.0818	0.1032	0.0776	0.1397	0.1192	0.1226	0.1585	0.1171	0.1713	0.1398	0.1143	0.1418			356	0.0637	0.0489	0.0316	0.1034
																														356.4	0.0816	0.1027	0.0779	0.1392	0.1196	0.1233	0.158	0.1152	0.1722	0.1399	0.1156	0.143			356.4	0.0641	0.0488	0.0316	0.1042
																														356.8	0.082	0.1026	0.0777	0.1388	0.118	0.1221	0.1576	0.1159	0.1718	0.1388	0.114	0.1426			356.8	0.064	0.0491	0.0321	0.1027
																														357.2	0.0814	0.1035	0.0775	0.1381	0.1189	0.1224	0.1569	0.1157	0.172	0.1384	0.1149	0.1426			357.2	0.0631	0.0493	0.0324	0.1022
																														357.6	0.0814	0.1027	0.0776	0.1398	0.1195	0.1222	0.1586	0.1166	0.1715	0.1397	0.114	0.1436			357.6	0.0638	0.0493	0.0323	0.103
																														358	0.0825	0.1028	0.0782	0.1394	0.1191	0.1224	0.1582	0.1158	0.1719	0.1387	0.1141	0.143			358	0.0648	0.0498	0.0317	0.1029
																														358.4	0.0818	0.1034	0.0778	0.1394	0.1186	0.1226	0.1582	0.1168	0.1714	0.139	0.1151	0.1433			358.4	0.0642	0.0488	0.032	0.1031
																														358.8	0.082	0.1031	0.0776	0.1385	0.1189	0.123	0.1573	0.1168	0.1717	0.1386	0.1147	0.1432			358.8	0.0643	0.0488	0.0314	0.1031
																														359.2	0.0816	0.1035	0.079	0.1389	0.1187	0.1218	0.1577	0.1162	0.171	0.1392	0.1148	0.1418			359.2	0.063	0.0489	0.0319	0.1036
																														359.6	0.0827	0.1033	0.0782	0.1384	0.1193	0.124	0.1572	0.1168	0.1721	0.1389	0.114	0.143			359.6	0.0649	0.0484	0.0319	0.1026
																														360	0.0823	0.1031	0.0786	0.139	0.1185	0.1218	0.1578	0.1169	0.1716	0.1385	0.1143	0.1426			360	0.0651	0.0499	0.0317	0.1032
																														360.4	0.0818	0.1034	0.0777	0.1388	0.1186	0.1225	0.1576	0.1171	0.172	0.1401	0.1142	0.1425			360.4	0.0651	0.049	0.0318	0.1026
																														360.8	0.082	0.1035	0.0782	0.1397	0.1192	0.1223	0.1585	0.1161	0.1723	0.14	0.1151	0.1429			360.8	0.065	0.0486	0.0314	0.1041
																														361.2	0.0825	0.1039	0.0786	0.1388	0.1186	0.1227	0.1576	0.1153	0.1717	0.1395	0.1147	0.1427			361.2	0.0654	0.0503	0.0316	0.1026
																														361.6	0.082	0.1033	0.0784	0.1388	0.1183	0.1234	0.1576	0.1167	0.1722	0.139	0.1149	0.143			361.6	0.0644	0.0491	0.0325	0.1036
																														362	0.0822	0.1038	0.0793	0.1384	0.1189	0.1224	0.1572	0.1176	0.1728	0.1389	0.114	0.1427			362	0.0653	0.049	0.0324	0.1036
																														362.4	0.0821	0.1037	0.0779	0.1402	0.1187	0.123	0.159	0.1163	0.1713	0.1384	0.1139	0.1422			362.4	0.0643	0.0499	0.0317	0.1032
																														362.8	0.0824	0.1043	0.0787	0.1403	0.1188	0.1235	0.1591	0.1166	0.1725	0.1397	0.1145	0.143			362.8	0.0657	0.0505	0.0325	0.1036
																														363.2	0.0826	0.1035	0.0785	0.1392	0.1177	0.1236	0.158	0.116	0.1713	0.1387	0.1147	0.1434			363.2	0.065	0.0496	0.0322	0.1032
																														363.6	0.0832	0.1045	0.0783	0.1395	0.1184	0.1231	0.1583	0.1177	0.1712	0.1403	0.1147	0.1432			363.6	0.0651	0.0489	0.0319	0.1048
																														364	0.0824	0.1044	0.0792	0.1397	0.1187	0.1238	0.1585	0.1168	0.1714	0.1394	0.1145	0.143			364	0.065	0.0494	0.0323	0.1037
																														364.4	0.0818	0.1035	0.0788	0.138	0.1187	0.1232	0.1568	0.1173	0.1714	0.1395	0.1139	0.1423			364.4	0.0653	0.0497	0.0324	0.1039
																														364.8	0.0822	0.1045	0.0792	0.1393	0.1191	0.1231	0.1581	0.1167	0.1718	0.1389	0.1145	0.1428			364.8	0.0651	0.0505	0.0327	0.104
																														365.2	0.0827	0.1038	0.0791	0.1389	0.119	0.1234	0.1577	0.1166	0.1723	0.1398	0.1144	0.1417			365.2	0.0646	0.0496	0.0316	0.1046
																														365.6	0.0828	0.1043	0.0788	0.1396	0.1188	0.1236	0.1584	0.1157	0.1713	0.1385	0.1146	0.1432			365.6	0.0644	0.0493	0.0316	0.1038
																														366	0.0825	0.1044	0.0789	0.1397	0.1186	0.1235	0.1585	0.1166	0.1713	0.1389	0.115	0.1427			366	0.0651	0.049	0.0319	0.1041
																														366.4	0.0832	0.1048	0.079	0.1389	0.1196	0.1236	0.1577	0.1168	0.172	0.1397	0.1144	0.1424			366.4	0.0649	0.0494	0.0332	0.1038
																														366.8	0.0818	0.1042	0.0793	0.1382	0.1183	0.1237	0.157	0.1163	0.1724	0.1385	0.1149	0.1429			366.8	0.0651	0.0502	0.0324	0.104
																														367.2	0.0823	0.1037	0.0794	0.1393	0.1192	0.1233	0.1581	0.1174	0.1706	0.1389	0.1139	0.1418			367.2	0.0664	0.0499	0.0335	0.1037
																														367.6	0.083	0.1041	0.0795	0.139	0.1178	0.1242	0.1578	0.1156	0.1722	0.1392	0.1144	0.1426			367.6	0.0661	0.05	0.0324	0.1044
																														368	0.0827	0.1044	0.079	0.1395	0.1186	0.124	0.1583	0.1159	0.1711	0.1394	0.1149	0.1436			368	0.0658	0.0495	0.0329	0.1029
																														368.4	0.0825	0.1043	0.0795	0.1396	0.1187	0.1243	0.1584	0.1154	0.1718	0.139	0.1145	0.1415			368.4	0.0652	0.0498	0.0324	0.1038
																														368.8	0.083	0.1045	0.0792	0.1382	0.1189	0.1238	0.157	0.1165	0.1707	0.1399	0.1137	0.1434			368.8	0.0644	0.0505	0.0326	0.1039
																														369.2	0.0828	0.1042	0.0798	0.1388	0.119	0.1241	0.1576	0.1176	0.1718	0.1402	0.1133	0.143			369.2	0.0649	0.0506	0.0333	0.1039
																														369.6	0.083	0.1043	0.0787	0.1386	0.1183	0.1238	0.1574	0.1166	0.1711	0.1384	0.1142	0.1418			369.6	0.065	0.0503	0.0328	0.1042
																														370	0.0831	0.1044	0.0793	0.139	0.1189	0.125	0.1578	0.1159	0.1712	0.1383	0.1141	0.1429			370	0.066	0.0507	0.0325	0.1038
																														370.4	0.0828	0.1053	0.0794	0.1398	0.1196	0.1237	0.1586	0.1155	0.1706	0.1392	0.1144	0.1412			370.4	0.0655	0.0497	0.0324	0.1034
																														370.8	0.0832	0.1051	0.0807	0.1402	0.1193	0.1241	0.159	0.1165	0.1716	0.1389	0.1144	0.143			370.8	0.0657	0.0492	0.0325	0.1038
																														371.2	0.0824	0.1042	0.0798	0.1393	0.1192	0.1247	0.1581	0.1165	0.1713	0.1401	0.1137	0.1428			371.2	0.0654	0.0502	0.033	0.1032
																														371.6	0.0834	0.1054	0.0798	0.1391	0.1192	0.1242	0.1579	0.1158	0.1716	0.1385	0.114	0.1421			371.6	0.0652	0.0501	0.0328	0.1058
																														372	0.0836	0.1051	0.0798	0.1392	0.1189	0.1234	0.158	0.1158	0.1717	0.1383	0.1136	0.1426			372	0.0666	0.0508	0.0329	0.1047
																														372.4	0.0847	0.105	0.0796	0.1406	0.1193	0.1235	0.1594	0.1162	0.1711	0.1399	0.1153	0.142			372.4	0.0664	0.0501	0.0323	0.1043
																														372.8	0.0835	0.1043	0.08	0.14	0.1185	0.124	0.1588	0.1166	0.172	0.1389	0.1143	0.1426			372.8	0.0654	0.0501	0.0332	0.1042
																														373.2	0.0832	0.1058	0.0798	0.1397	0.1194	0.1244	0.1585	0.1164	0.1708	0.139	0.1144	0.1426			373.2	0.0659	0.0497	0.0329	0.1029
																														373.6	0.0833	0.1048	0.0803	0.1388	0.1192	0.1243	0.1576	0.1161	0.1718	0.138	0.1135	0.1421			373.6	0.0665	0.0499	0.0327	0.104
																														374	0.0822	0.1055	0.0801	0.1394	0.1189	0.1247	0.1582	0.1162	0.1717	0.1392	0.1147	0.1427			374	0.0662	0.05	0.0333	0.1048
																														374.4	0.0836	0.1058	0.0787	0.1391	0.119	0.1241	0.1579	0.1164	0.1717	0.139	0.1141	0.1423			374.4	0.0662	0.0501	0.033	0.1047
																														374.8	0.0836	0.1053	0.0803	0.1395	0.1191	0.1248	0.1583	0.1164	0.1711	0.1393	0.1151	0.1424			374.8	0.066	0.0511	0.0327	0.1035
																														375.2	0.0838	0.1047	0.0798	0.1388	0.1191	0.1242	0.1576	0.1165	0.1705	0.1383	0.1145	0.1415			375.2	0.0655	0.0505	0.0332	0.104
																														375.6	0.0827	0.1064	0.0805	0.1402	0.1197	0.1248	0.159	0.1166	0.1717	0.1394	0.1148	0.1422			375.6	0.0654	0.0499	0.0328	0.1044
																														376	0.0836	0.1049	0.0807	0.1392	0.1195	0.1242	0.158	0.1168	0.1705	0.139	0.1144	0.1448			376	0.0665	0.0501	0.0326	0.1042
																														376.4	0.083	0.1049	0.0808	0.1393	0.1199	0.1245	0.1581	0.1171	0.1718	0.139	0.1143	0.1432			376.4	0.0661	0.0508	0.0321	0.1041
																														376.8	0.0832	0.106	0.0799	0.1404	0.1197	0.124	0.1592	0.1158	0.172	0.1385	0.1139	0.1427			376.8	0.0666	0.0508	0.0328	0.1049
																														377.2	0.0839	0.1055	0.0806	0.1397	0.1187	0.124	0.1585	0.1155	0.1715	0.1389	0.1143	0.1427			377.2	0.0659	0.0512	0.0339	0.1049
																														377.6	0.0838	0.106	0.0807	0.1391	0.1187	0.1243	0.1579	0.1162	0.1723	0.1396	0.1142	0.1424			377.6	0.0659	0.0502	0.0327	0.1045
																														378	0.084	0.1058	0.0804	0.1393	0.1186	0.1249	0.1581	0.1163	0.1712	0.1394	0.1147	0.1414			378	0.0662	0.05	0.0331	0.1038
																														378.4	0.0841	0.1065	0.0809	0.1389	0.1189	0.1249	0.1577	0.1161	0.1716	0.1393	0.114	0.1417			378.4	0.0664	0.0498	0.0323	0.1038
																														378.8	0.084	0.1057	0.0809	0.1395	0.1187	0.1243	0.1583	0.1148	0.1715	0.1397	0.1144	0.1431			378.8	0.0652	0.0516	0.0327	0.1041
																														379.2	0.0836	0.1064	0.081	0.1399	0.1196	0.1245	0.1587	0.1165	0.1708	0.1387	0.1146	0.1436			379.2	0.0666	0.0515	0.0339	0.1049
																														379.6	0.0835	0.1064	0.0805	0.1399	0.1186	0.1245	0.1587	0.1155	0.1716	0.1383	0.1152	0.1426			379.6	0.0658	0.051	0.034	0.105
																														380	0.0842	0.1058	0.0804	0.1404	0.1196	0.1254	0.1592	0.116	0.1712	0.1396	0.114	0.1431			380	0.0656	0.0507	0.0332	0.1037
																														380.4	0.0847	0.1057	0.0804	0.1388	0.1183	0.1244	0.1576	0.1161	0.1711	0.1394	0.1143	0.1429			380.4	0.0655	0.0505	0.0333	0.1041
																														380.8	0.0838	0.1061	0.0805	0.1399	0.1192	0.1249	0.1587	0.1165	0.1723	0.1398	0.114	0.1429			380.8	0.067	0.0509	0.0333	0.1051
																														381.2	0.0842	0.1069	0.0809	0.139	0.1196	0.1251	0.1578	0.1155	0.1705	0.1381	0.1145	0.1432			381.2	0.0662	0.05	0.0331	0.1055
																														381.6	0.0835	0.1062	0.0806	0.1391	0.1189	0.1261	0.1579	0.1165	0.1713	0.139	0.1147	0.1428			381.6	0.0663	0.0519	0.0337	0.1049
																														382	0.0842	0.106	0.0809	0.1402	0.1192	0.1245	0.159	0.1167	0.1713	0.1383	0.1147	0.1432			382	0.066	0.0507	0.0339	0.1047
																														382.4	0.0838	0.1064	0.0812	0.1388	0.1188	0.1248	0.1576	0.1166	0.1718	0.138	0.1151	0.1433			382.4	0.0665	0.0516	0.0334	0.1049
																														382.8	0.0836	0.1058	0.0809	0.1399	0.1192	0.1249	0.1587	0.1172	0.1714	0.139	0.1143	0.1425			382.8	0.0664	0.0514	0.0332	0.1056
																														383.2	0.0841	0.1055	0.0815	0.1386	0.1189	0.1256	0.1574	0.116	0.1716	0.1389	0.1142	0.1422			383.2	0.0667	0.051	0.0327	0.1049
																														383.6	0.0843	0.1067	0.0813	0.1388	0.1195	0.1257	0.1576	0.1161	0.1711	0.139	0.1144	0.143			383.6	0.0666	0.0515	0.034	0.105
																														384	0.0845	0.1069	0.0811	0.1395	0.1185	0.125	0.1583	0.1165	0.1719	0.1386	0.1142	0.1418			384	0.0672	0.0513	0.0337	0.1048
																														384.4	0.0849	0.1064	0.081	0.1397	0.1188	0.1244	0.1585	0.1165	0.1718	0.1393	0.1146	0.1433			384.4	0.067	0.051	0.0332	0.1054
																														384.8	0.0854	0.1075	0.0813	0.139	0.1183	0.125	0.1578	0.1163	0.1713	0.1381	0.1149	0.143			384.8	0.067	0.0513	0.0339	0.1048
																														385.2	0.0844	0.107	0.0817	0.1395	0.1193	0.1254	0.1583	0.1163	0.1712	0.139	0.1144	0.1426			385.2	0.0667	0.0511	0.0328	0.1052
																														385.6	0.0843	0.1066	0.0822	0.1392	0.1188	0.1256	0.158	0.117	0.1718	0.1384	0.1145	0.1423			385.6	0.0676	0.0509	0.0346	0.1045
																														386	0.0842	0.1058	0.082	0.1394	0.1191	0.1253	0.1582	0.1163	0.1718	0.1384	0.1149	0.142			386	0.0669	0.0521	0.0335	0.1058
																														386.4	0.085	0.1067	0.0812	0.1395	0.1194	0.1256	0.1583	0.1165	0.1713	0.1384	0.1153	0.1427			386.4	0.0667	0.0514	0.0338	0.1049
																														386.8	0.085	0.1071	0.0818	0.1389	0.1192	0.1263	0.1577	0.1152	0.1722	0.1388	0.1136	0.1428			386.8	0.0682	0.0512	0.0342	0.1057
																														387.2	0.0849	0.1076	0.0811	0.1397	0.1189	0.1259	0.1585	0.1157	0.1726	0.1387	0.1151	0.1425			387.2	0.0674	0.0516	0.0341	0.106
																														387.6	0.0849	0.1068	0.0818	0.1388	0.1185	0.125	0.1576	0.1159	0.1718	0.1385	0.1139	0.143			387.6	0.0685	0.0508	0.0337	0.1055
																														388	0.0848	0.1076	0.0818	0.139	0.1196	0.1256	0.1578	0.1164	0.1706	0.1395	0.1141	0.1429			388	0.0672	0.0507	0.0331	0.1055
																														388.4	0.0853	0.1064	0.0818	0.139	0.1192	0.1264	0.1578	0.1158	0.171	0.1395	0.1149	0.1436			388.4	0.0675	0.0522	0.0336	0.1058
																														388.8	0.0844	0.1069	0.0817	0.1392	0.119	0.1251	0.158	0.1158	0.1725	0.1386	0.1153	0.1423			388.8	0.0669	0.0517	0.0336	0.1049
																														389.2	0.0853	0.1077	0.0808	0.1395	0.1185	0.1264	0.1583	0.1162	0.1719	0.1384	0.1145	0.1436			389.2	0.0669	0.0522	0.0345	0.1049
																														389.6	0.0856	0.1076	0.0828	0.1398	0.1197	0.1254	0.1586	0.1172	0.1718	0.1391	0.1147	0.1432			389.6	0.0676	0.0517	0.033	0.1049
																														390	0.0853	0.1075	0.0821	0.1405	0.1186	0.1262	0.1593	0.1168	0.1711	0.1395	0.1137	0.142			390	0.0683	0.0512	0.0343	0.1052
																														390.4	0.0844	0.1065	0.0822	0.1391	0.1201	0.1258	0.1579	0.1158	0.1716	0.1385	0.1145	0.1428			390.4	0.0674	0.0511	0.0333	0.1063
																														390.8	0.085	0.1065	0.0814	0.1391	0.1189	0.1264	0.1579	0.1168	0.1717	0.1396	0.115	0.143			390.8	0.0674	0.0509	0.0333	0.1055
																														391.2	0.0849	0.1071	0.0807	0.1389	0.1192	0.1257	0.1577	0.1164	0.1727	0.1392	0.1153	0.1413			391.2	0.0674	0.0517	0.0345	0.1055
																														391.6	0.0851	0.1077	0.0828	0.1399	0.1193	0.1254	0.1587	0.1168	0.1712	0.1394	0.114	0.1427			391.6	0.0679	0.0519	0.0338	0.1063
																														392	0.0853	0.1072	0.0827	0.1387	0.1194	0.1265	0.1575	0.1175	0.1725	0.1392	0.1148	0.1425			392	0.0677	0.0512	0.0336	0.1059
																														392.4	0.0856	0.1079	0.082	0.1396	0.12	0.126	0.1584	0.1164	0.1716	0.1389	0.1145	0.1433			392.4	0.0679	0.0517	0.0337	0.1053
																														392.8	0.0855	0.1076	0.0823	0.1398	0.1192	0.1264	0.1586	0.1154	0.1718	0.1389	0.1144	0.1434			392.8	0.0684	0.052	0.0333	0.106
																														393.2	0.0854	0.1084	0.0812	0.1387	0.1198	0.1251	0.1575	0.1165	0.1714	0.1387	0.1149	0.1422			393.2	0.0676	0.0516	0.0333	0.106
																														393.6	0.0847	0.108	0.0822	0.1389	0.1192	0.126	0.1577	0.116	0.1726	0.1377	0.1148	0.142			393.6	0.0678	0.0516	0.0351	0.1058
																														394	0.0855	0.1081	0.0813	0.1396	0.1194	0.1252	0.1584	0.116	0.1724	0.1385	0.1143	0.1425			394	0.0669	0.0519	0.0336	0.1055
																														394.4	0.0855	0.1074	0.0834	0.1403	0.1194	0.1271	0.1591	0.1155	0.1718	0.1374	0.1131	0.1423			394.4	0.0676	0.0525	0.034	0.1055
																														394.8	0.0856	0.1082	0.0821	0.1402	0.1194	0.1266	0.159	0.1166	0.1722	0.1388	0.1143	0.1424			394.8	0.068	0.052	0.0344	0.1058
																														395.2	0.0861	0.1082	0.0825	0.1379	0.1192	0.1267	0.1567	0.1161	0.1711	0.1385	0.1143	0.1437			395.2	0.068	0.0521	0.034	0.106
																														395.6	0.0857	0.108	0.0816	0.1385	0.1199	0.126	0.1573	0.1158	0.1717	0.1387	0.1144	0.1433			395.6	0.0682	0.0521	0.0335	0.1057
																														396	0.0854	0.1085	0.0826	0.1393	0.1194	0.1257	0.1581	0.116	0.1715	0.1387	0.1144	0.1425			396	0.0678	0.0516	0.0338	0.1059
																														396.4	0.0852	0.1076	0.0835	0.1395	0.1205	0.1256	0.1583	0.1159	0.1713	0.1386	0.1137	0.1426			396.4	0.0682	0.052	0.0338	0.1051
																														396.8	0.0853	0.1079	0.0826	0.1395	0.119	0.126	0.1583	0.1164	0.1717	0.1382	0.1146	0.1422			396.8	0.068	0.052	0.0341	0.1063
																														397.2	0.0851	0.1082	0.0832	0.1399	0.119	0.1269	0.1587	0.1159	0.1721	0.1386	0.1149	0.1428			397.2	0.0682	0.0522	0.0341	0.1061
																														397.6	0.0867	0.1082	0.0832	0.1402	0.1194	0.1266	0.159	0.1174	0.1719	0.1391	0.1141	0.1427			397.6	0.0685	0.051	0.0335	0.1061
																														398	0.0865	0.1078	0.0834	0.1397	0.1195	0.1261	0.1585	0.1154	0.1716	0.1394	0.1148	0.1431			398	0.068	0.0525	0.0345	0.1074
																														398.4	0.0867	0.1081	0.0828	0.1393	0.1191	0.1261	0.1581	0.1155	0.1712	0.1391	0.114	0.1421			398.4	0.0678	0.0519	0.0341	0.1063
																														398.8	0.0849	0.1079	0.0828	0.1398	0.1195	0.1266	0.1586	0.1156	0.1715	0.138	0.1147	0.142			398.8	0.0686	0.0525	0.0344	0.105
																														399.2	0.0858	0.1077	0.0836	0.1392	0.1197	0.1272	0.158	0.1174	0.1722	0.1388	0.1144	0.1429			399.2	0.0696	0.0517	0.0348	0.1062
																														399.6	0.0854	0.1077	0.0831	0.1386	0.1199	0.1271	0.1574	0.1161	0.1713	0.1387	0.1149	0.1426			399.6	0.0677	0.0519	0.0345	0.1065
																														400	0.0866	0.1087	0.0834	0.1395	0.1184	0.1267	0.1583	0.1156	0.1718	0.1394	0.1153	0.1423			400	0.0684	0.0521	0.0339	0.1066
																														400.4	0.0861	0.1079	0.0822	0.1398	0.1197	0.1263	0.1586	0.1162	0.1719	0.1392	0.1148	0.1422			400.4	0.0683	0.0518	0.0344	0.1065
																														400.8	0.086	0.1083	0.0833	0.1393	0.1188	0.1264	0.1581	0.1152	0.1718	0.1384	0.1152	0.1416			400.8	0.068	0.0523	0.0338	0.1059
																														401.2	0.0865	0.108	0.0833	0.1401	0.1201	0.1266	0.1589	0.1159	0.1713	0.1392	0.1136	0.1427			401.2	0.0689	0.0521	0.0341	0.1065
																														401.6	0.0861	0.1079	0.0836	0.1399	0.1198	0.1268	0.1587	0.116	0.1716	0.1378	0.1145	0.142			401.6	0.0689	0.0524	0.0345	0.1065
																														402	0.0863	0.1086	0.0839	0.1386	0.119	0.1273	0.1574	0.1168	0.1715	0.1391	0.1146	0.1434			402	0.069	0.0525	0.0343	0.1073
																														402.4	0.0865	0.1083	0.0833	0.1392	0.1198	0.1269	0.158	0.1151	0.1716	0.1389	0.1149	0.1429			402.4	0.0694	0.0522	0.035	0.1066
																														402.8	0.0873	0.1086	0.0836	0.1393	0.1194	0.127	0.1581	0.116	0.1716	0.1385	0.1147	0.1422			402.8	0.0683	0.0525	0.0352	0.1068
																														403.2	0.0858	0.1085	0.0838	0.14	0.1195	0.1262	0.1588	0.1156	0.1723	0.1393	0.1145	0.1432			403.2	0.0688	0.0527	0.0342	0.1066
																														403.6	0.0865	0.1084	0.0837	0.1402	0.1199	0.1267	0.159	0.116	0.1717	0.1384	0.1142	0.1421			403.6	0.0682	0.0524	0.0348	0.1065
																														404	0.0863	0.1086	0.0835	0.1395	0.1199	0.127	0.1583	0.116	0.1722	0.1387	0.1147	0.1426			404	0.0691	0.0534	0.0345	0.1064
																														404.4	0.0865	0.109	0.0841	0.1394	0.1199	0.1277	0.1582	0.1166	0.1726	0.1393	0.1141	0.1426			404.4	0.0686	0.0523	0.0349	0.1079
																														404.8	0.0868	0.1095	0.0837	0.14	0.1195	0.1275	0.1588	0.1162	0.1723	0.1378	0.1148	0.1433			404.8	0.0685	0.052	0.0347	0.1075
																														405.2	0.0872	0.1088	0.0842	0.1391	0.12	0.1272	0.1579	0.1168	0.1725	0.1384	0.1147	0.1422			405.2	0.0694	0.0527	0.0336	0.1073
																														405.6	0.0867	0.1094	0.0828	0.1393	0.12	0.1272	0.1581	0.1156	0.1716	0.1389	0.1146	0.1426			405.6	0.0701	0.053	0.0347	0.1075
																														406	0.087	0.1089	0.0841	0.1396	0.1191	0.1283	0.1584	0.1164	0.1724	0.138	0.1143	0.1422			406	0.0693	0.0526	0.0351	0.1059
																														406.4	0.0875	0.1093	0.0844	0.1398	0.1191	0.1278	0.1586	0.1164	0.1718	0.1397	0.114	0.1428			406.4	0.0693	0.0535	0.0339	0.1062
																														406.8	0.0859	0.1092	0.0842	0.138	0.1193	0.1267	0.1568	0.1158	0.1715	0.1375	0.1153	0.1424			406.8	0.0692	0.0525	0.0356	0.1065
																														407.2	0.0863	0.1088	0.0842	0.1394	0.1194	0.1274	0.1582	0.116	0.1715	0.1385	0.1144	0.1432			407.2	0.0692	0.0532	0.0342	0.107
																														407.6	0.0866	0.1096	0.0836	0.1383	0.1185	0.1272	0.1571	0.1159	0.1716	0.1383	0.1152	0.1428			407.6	0.0695	0.0523	0.0336	0.1074
																														408	0.0875	0.11	0.0841	0.1404	0.1196	0.1272	0.1592	0.116	0.1719	0.1385	0.1131	0.1426			408	0.0692	0.0537	0.0339	0.1069
																														408.4	0.0863	0.1088	0.0842	0.139	0.1196	0.127	0.1578	0.1162	0.171	0.1398	0.1148	0.143			408.4	0.0688	0.0536	0.0343	0.1076
																														408.8	0.0867	0.1087	0.0837	0.1391	0.1202	0.1287	0.1579	0.1166	0.1719	0.1384	0.114	0.1421			408.8	0.0696	0.0538	0.0357	0.107
																														409.2	0.0866	0.1098	0.0839	0.1393	0.1203	0.128	0.1581	0.1154	0.1709	0.1373	0.1151	0.1427			409.2	0.0684	0.0531	0.0348	0.1071
																														409.6	0.0872	0.1089	0.0841	0.14	0.1198	0.1272	0.1588	0.1158	0.1721	0.1382	0.1147	0.143			409.6	0.0688	0.0523	0.0348	0.1068
																														410	0.0872	0.108	0.0847	0.1397	0.1189	0.127	0.1585	0.1147	0.1717	0.1387	0.1148	0.143			410	0.0684	0.053	0.0341	0.1073
																														410.4	0.0879	0.1101	0.0845	0.1396	0.12	0.1274	0.1584	0.1159	0.1729	0.1391	0.1144	0.1437			410.4	0.0694	0.0529	0.0348	0.1058
																														410.8	0.0873	0.1089	0.0846	0.1396	0.1189	0.1271	0.1584	0.1164	0.1716	0.1388	0.1142	0.1425			410.8	0.0703	0.0536	0.035	0.1065
																														411.2	0.088	0.1096	0.0847	0.1391	0.1192	0.1275	0.1579	0.1159	0.1715	0.1384	0.1153	0.1425			411.2	0.0704	0.0531	0.035	0.1072
																														411.6	0.0879	0.1094	0.0843	0.1399	0.1197	0.1276	0.1587	0.1159	0.1712	0.1384	0.1153	0.1422			411.6	0.0687	0.054	0.0349	0.1068
																														412	0.0864	0.1094	0.0836	0.1379	0.12	0.1266	0.1567	0.1158	0.1729	0.1393	0.1143	0.142			412	0.0696	0.053	0.0351	0.1078
																														412.4	0.0878	0.1093	0.0841	0.14	0.1196	0.1274	0.1588	0.1168	0.1713	0.1385	0.1142	0.142			412.4	0.0707	0.0537	0.0356	0.1073
																														412.8	0.0881	0.1099	0.0845	0.1404	0.119	0.1276	0.1592	0.1161	0.1713	0.1383	0.114	0.1434			412.8	0.0699	0.0533	0.0345	0.1059
																														413.2	0.0872	0.1096	0.0846	0.1394	0.1197	0.127	0.1582	0.1166	0.1711	0.1394	0.1143	0.1429			413.2	0.0692	0.0535	0.0348	0.1074
																														413.6	0.0878	0.1098	0.0845	0.139	0.1192	0.1276	0.1578	0.1162	0.1714	0.1369	0.1151	0.1424			413.6	0.0697	0.0541	0.0351	0.1066
																														414	0.0878	0.1098	0.0842	0.1395	0.1199	0.1276	0.1583	0.1165	0.1716	0.1381	0.114	0.1427			414	0.0693	0.0538	0.0357	0.1066
																														414.4	0.0868	0.1099	0.0845	0.1392	0.1189	0.1271	0.158	0.1159	0.1714	0.1389	0.1149	0.1419			414.4	0.0693	0.0539	0.0356	0.1066
																														414.8	0.0871	0.1101	0.0846	0.14	0.1194	0.1277	0.1588	0.1163	0.172	0.1384	0.1142	0.1428			414.8	0.0699	0.0536	0.0342	0.1071
																														415.2	0.0875	0.1101	0.0852	0.1391	0.1194	0.1276	0.1579	0.1157	0.1723	0.138	0.1137	0.1427			415.2	0.0696	0.0538	0.0345	0.1061
																														415.6	0.0883	0.1102	0.0843	0.1391	0.1191	0.1278	0.1579	0.1162	0.1716	0.1387	0.1148	0.1432			415.6	0.0698	0.0538	0.0351	0.1071
																														416	0.0871	0.1105	0.0852	0.1398	0.1197	0.1272	0.1586	0.1156	0.1716	0.1388	0.1159	0.143			416	0.0694	0.0544	0.0358	0.1083
																														416.4	0.0876	0.1101	0.0852	0.1391	0.12	0.1274	0.1579	0.1163	0.1719	0.1386	0.1139	0.1423			416.4	0.0689	0.0539	0.0355	0.1068
																														416.8	0.0875	0.1102	0.0836	0.1401	0.1192	0.1288	0.1589	0.1154	0.172	0.1386	0.1144	0.1433			416.8	0.0699	0.054	0.0357	0.1072
																														417.2	0.0877	0.1098	0.0855	0.1396	0.1206	0.1278	0.1584	0.1162	0.1718	0.1378	0.1142	0.1424			417.2	0.069	0.0526	0.0347	0.1074
																														417.6	0.0889	0.1096	0.0851	0.1392	0.119	0.1276	0.158	0.1155	0.1719	0.1397	0.1139	0.143			417.6	0.07	0.053	0.0349	0.1073
																														418	0.0883	0.11	0.085	0.1401	0.1195	0.1279	0.1589	0.1166	0.1714	0.139	0.1139	0.143			418	0.0697	0.0534	0.0348	0.1076
																														418.4	0.0877	0.1102	0.0848	0.1386	0.1194	0.1274	0.1574	0.115	0.1729	0.1388	0.1148	0.1425			418.4	0.0703	0.0546	0.0354	0.1071
																														418.8	0.0878	0.1114	0.0848	0.1388	0.1201	0.1281	0.1576	0.1156	0.1705	0.1373	0.1139	0.1425			418.8	0.0697	0.0532	0.0353	0.1072
																														419.2	0.0878	0.1105	0.0852	0.1387	0.1199	0.1284	0.1575	0.1156	0.1718	0.138	0.1145	0.142			419.2	0.0705	0.054	0.0352	0.1077
																														419.6	0.0879	0.1098	0.0854	0.1391	0.1197	0.1284	0.1579	0.1151	0.1719	0.1381	0.1136	0.1423			419.6	0.0703	0.0534	0.035	0.1075
																														420	0.088	0.1099	0.0855	0.1399	0.1192	0.1287	0.1587	0.1158	0.172	0.1383	0.1149	0.1431			420	0.0692	0.0542	0.0352	0.1079
																														420.4	0.0883	0.1096	0.0855	0.1394	0.1191	0.1277	0.1582	0.1164	0.1719	0.1395	0.1144	0.142			420.4	0.0705	0.055	0.0354	0.1076
																														420.8	0.0878	0.1109	0.0853	0.1397	0.1195	0.1283	0.1585	0.1153	0.1718	0.1381	0.1145	0.1427			420.8	0.0708	0.0542	0.0354	0.1074
																														421.2	0.0878	0.1099	0.0854	0.1401	0.1201	0.1279	0.1589	0.1153	0.1711	0.1388	0.1142	0.1429			421.2	0.0692	0.0537	0.0358	0.1075
																														421.6	0.0886	0.1107	0.0856	0.1389	0.1193	0.1281	0.1577	0.1151	0.1732	0.1377	0.1144	0.1422			421.6	0.0707	0.0542	0.0355	0.1077
																														422	0.089	0.1107	0.0855	0.1386	0.1189	0.1293	0.1574	0.1155	0.1719	0.1388	0.1134	0.1425			422	0.0708	0.0539	0.0353	0.1073
																														422.4	0.0889	0.1101	0.0857	0.1402	0.1198	0.1285	0.159	0.1158	0.1726	0.139	0.1143	0.1422			422.4	0.0703	0.0534	0.0353	0.1074
																														422.8	0.0876	0.1098	0.0854	0.1398	0.1192	0.129	0.1586	0.1154	0.1719	0.1389	0.1152	0.1417			422.8	0.0711	0.0545	0.0359	0.1079
																														423.2	0.0891	0.1113	0.0859	0.1391	0.1202	0.1278	0.1579	0.1161	0.171	0.1385	0.1144	0.1428			423.2	0.0695	0.0544	0.0354	0.1083
																														423.6	0.0877	0.1105	0.0852	0.14	0.1204	0.128	0.1588	0.1166	0.1723	0.1392	0.1143	0.1428			423.6	0.0694	0.0541	0.0354	0.108
																														424	0.0888	0.1108	0.0864	0.1393	0.121	0.1282	0.1581	0.1154	0.1715	0.1389	0.1148	0.1429			424	0.0703	0.0543	0.0362	0.1083
																														424.4	0.0882	0.1101	0.0847	0.1394	0.1192	0.1288	0.1582	0.1159	0.1711	0.1393	0.1141	0.1424			424.4	0.0701	0.054	0.035	0.1069
																														424.8	0.0888	0.1115	0.0858	0.1395	0.1197	0.1284	0.1583	0.1157	0.1717	0.1385	0.1147	0.1424			424.8	0.072	0.0542	0.0361	0.1084
																														425.2	0.0885	0.1104	0.0863	0.1394	0.1201	0.1282	0.1582	0.1161	0.1714	0.1386	0.1145	0.1415			425.2	0.0712	0.0543	0.0357	0.1084
																														425.6	0.0881	0.1113	0.0855	0.1383	0.1199	0.128	0.1571	0.1158	0.1714	0.1385	0.1152	0.1432			425.6	0.0705	0.0545	0.0355	0.1079
																														426	0.0887	0.1101	0.0855	0.1393	0.1195	0.1286	0.1581	0.1157	0.172	0.1385	0.1134	0.1421			426	0.0705	0.0546	0.0365	0.1084
																														426.4	0.0885	0.1113	0.0864	0.1389	0.1195	0.1298	0.1577	0.1153	0.1718	0.1385	0.1138	0.1426			426.4	0.0704	0.0543	0.0349	0.1073
																														426.8	0.0892	0.1105	0.0868	0.1398	0.1195	0.1285	0.1586	0.1154	0.1728	0.1379	0.1137	0.1429			426.8	0.0709	0.0536	0.0359	0.1079
																														427.2	0.0889	0.1121	0.0863	0.1393	0.1194	0.129	0.1581	0.1152	0.1721	0.1392	0.1146	0.1426			427.2	0.0707	0.0547	0.0354	0.1083
																														427.6	0.0885	0.111	0.0861	0.1404	0.1192	0.1288	0.1592	0.1163	0.1716	0.1385	0.1149	0.1428			427.6	0.0713	0.0541	0.0356	0.1071
																														428	0.0883	0.1122	0.0859	0.139	0.1202	0.1285	0.1578	0.1156	0.1715	0.138	0.1145	0.1422			428	0.0714	0.0542	0.0359	0.108
																														428.4	0.0885	0.1104	0.0857	0.1404	0.1199	0.1284	0.1592	0.1152	0.1722	0.138	0.114	0.1425			428.4	0.0707	0.0546	0.0358	0.1074
																														428.8	0.0884	0.1112	0.0857	0.1391	0.12	0.1283	0.1579	0.1157	0.1711	0.1391	0.1135	0.1423			428.8	0.0705	0.0542	0.0363	0.1069
																														429.2	0.0888	0.1117	0.0872	0.1391	0.1199	0.1286	0.1579	0.1159	0.172	0.1375	0.1143	0.1431			429.2	0.0708	0.0537	0.0364	0.1071
																														429.6	0.0881	0.1121	0.0859	0.1397	0.1204	0.1293	0.1585	0.1166	0.1731	0.1385	0.1155	0.1427			429.6	0.0722	0.0544	0.0352	0.1086
																														430	0.0895	0.111	0.0859	0.1402	0.1194	0.1283	0.159	0.1157	0.1722	0.1393	0.1145	0.1419			430	0.0712	0.0554	0.0357	0.1081
																														430.4	0.0886	0.1116	0.0859	0.1393	0.1195	0.1282	0.1581	0.1162	0.1715	0.1396	0.1146	0.1416			430.4	0.0709	0.0543	0.0356	0.1088
																														430.8	0.0889	0.111	0.0869	0.1402	0.1191	0.1288	0.159	0.1166	0.1715	0.1387	0.1133	0.1425			430.8	0.0717	0.0551	0.0358	0.1077
																														431.2	0.0887	0.1114	0.0871	0.1399	0.1205	0.1294	0.1587	0.115	0.1708	0.1392	0.1142	0.1426			431.2	0.0716	0.055	0.0368	0.108
																														431.6	0.0896	0.1121	0.0868	0.1398	0.12	0.1287	0.1586	0.116	0.1721	0.1383	0.1152	0.1432			431.6	0.0719	0.0541	0.0365	0.1087
																														432	0.0902	0.1116	0.0871	0.1398	0.1201	0.1285	0.1586	0.1151	0.1718	0.1389	0.1144	0.143			432	0.0718	0.0552	0.035	0.1076
																														432.4	0.0894	0.1124	0.086	0.1394	0.1195	0.1282	0.1582	0.1152	0.1722	0.1391	0.1139	0.1433			432.4	0.0716	0.0546	0.036	0.1084
																														432.8	0.0889	0.1123	0.0864	0.1393	0.1196	0.1293	0.1581	0.116	0.1712	0.1381	0.1132	0.1429			432.8	0.0716	0.0552	0.0359	0.1092
																														433.2	0.0897	0.1119	0.0864	0.139	0.1192	0.1288	0.1578	0.1157	0.1718	0.139	0.1143	0.1428			433.2	0.0706	0.0544	0.0361	0.1081
																														433.6	0.0894	0.1112	0.0873	0.1396	0.1193	0.1296	0.1584	0.1151	0.1719	0.138	0.1149	0.1431			433.6	0.0719	0.0559	0.0364	0.1084
																														434	0.0886	0.1109	0.0875	0.1402	0.1198	0.1296	0.159	0.1155	0.1724	0.1388	0.1144	0.1427			434	0.0711	0.0546	0.0359	0.1085
																														434.4	0.0896	0.1113	0.087	0.1404	0.1201	0.1295	0.1592	0.116	0.1715	0.1389	0.1143	0.1432			434.4	0.0705	0.0555	0.0355	0.1085
																														434.8	0.0896	0.1122	0.0872	0.1394	0.1195	0.1287	0.1582	0.1163	0.1726	0.1384	0.1146	0.1431			434.8	0.0731	0.055	0.0366	0.1082
																														435.2	0.0903	0.1118	0.0868	0.1392	0.118	0.1294	0.158	0.1162	0.1716	0.1384	0.114	0.1425			435.2	0.0716	0.0551	0.0363	0.1082
																														435.6	0.0894	0.1113	0.0861	0.14	0.1198	0.1294	0.1588	0.1149	0.1716	0.139	0.1142	0.1432			435.6	0.0714	0.0545	0.0358	0.1075
																														436	0.0892	0.1113	0.0873	0.1394	0.1204	0.1295	0.1582	0.1152	0.1722	0.1382	0.1149	0.142			436	0.0719	0.0553	0.0367	0.1075
																														436.4	0.0884	0.1112	0.0876	0.14	0.1198	0.1299	0.1588	0.115	0.1724	0.1377	0.1149	0.1427			436.4	0.0721	0.0546	0.0354	0.1082
																														436.8	0.0901	0.1114	0.088	0.1404	0.1196	0.1297	0.1592	0.1153	0.1716	0.1386	0.1142	0.1433			436.8	0.0721	0.0552	0.0363	0.1081
																														437.2	0.0896	0.1122	0.0873	0.1394	0.1193	0.1296	0.1582	0.1157	0.1713	0.1388	0.1141	0.1427			437.2	0.0724	0.0553	0.0362	0.1088
																														437.6	0.0902	0.1122	0.0873	0.1403	0.1199	0.1292	0.1591	0.1162	0.172	0.1388	0.114	0.1422			437.6	0.0719	0.0551	0.0361	0.1088
																														438	0.0889	0.1128	0.0876	0.1383	0.1199	0.1302	0.1571	0.1154	0.1718	0.1385	0.1147	0.143			438	0.0716	0.0557	0.0362	0.108
																														438.4	0.0902	0.1125	0.0867	0.1407	0.1203	0.1295	0.1595	0.1163	0.1719	0.1392	0.1148	0.1428			438.4	0.0714	0.0557	0.0368	0.1081
																														438.8	0.089	0.1128	0.0874	0.1392	0.1195	0.1292	0.158	0.1165	0.1719	0.1377	0.1147	0.1421			438.8	0.0725	0.0547	0.0366	0.1088
																														439.2	0.0902	0.1119	0.0875	0.1401	0.1193	0.1292	0.1589	0.1155	0.1721	0.1388	0.1148	0.1427			439.2	0.0719	0.0552	0.0364	0.1088
																														439.6	0.09	0.1125	0.0873	0.1394	0.1207	0.1294	0.1582	0.1153	0.1716	0.1385	0.1143	0.1429			439.6	0.0723	0.0551	0.0365	0.1085
																														440	0.0899	0.1121	0.0869	0.1396	0.1197	0.1294	0.1584	0.1152	0.1713	0.1384	0.1149	0.1422			440	0.0713	0.0557	0.036	0.1084
																														440.4	0.0895	0.1134	0.0873	0.1394	0.1204	0.13	0.1582	0.1153	0.1715	0.1388	0.1151	0.1428			440.4	0.0717	0.0556	0.0364	0.1084
																														440.8	0.0893	0.112	0.0885	0.1397	0.1193	0.1297	0.1585	0.1155	0.1715	0.1381	0.1149	0.1424			440.8	0.0717	0.0556	0.0363	0.1088
																														441.2	0.0891	0.112	0.0879	0.1402	0.1196	0.13	0.159	0.116	0.1719	0.1385	0.1142	0.142			441.2	0.0709	0.0552	0.0374	0.1088
																														441.6	0.09	0.112	0.0879	0.1394	0.1197	0.1294	0.1582	0.1158	0.1716	0.138	0.1146	0.1419			441.6	0.0728	0.0547	0.0364	0.109
																														442	0.0899	0.1117	0.0875	0.1391	0.1194	0.1287	0.1579	0.1161	0.1713	0.1397	0.114	0.1432			442	0.072	0.0556	0.0363	0.1091
																														442.4	0.0902	0.1118	0.088	0.1399	0.1201	0.1292	0.1587	0.1155	0.1719	0.138	0.1147	0.1435			442.4	0.0721	0.0563	0.0371	0.1087
																														442.8	0.0896	0.1126	0.0874	0.1392	0.1201	0.1288	0.158	0.1151	0.172	0.139	0.1145	0.1428			442.8	0.0709	0.0546	0.0364	0.1078
																														443.2	0.0898	0.1125	0.0874	0.1394	0.1196	0.1299	0.1582	0.1152	0.1719	0.1378	0.1149	0.1424			443.2	0.0729	0.0561	0.0366	0.1091
																														443.6	0.0904	0.1119	0.0883	0.1396	0.1204	0.129	0.1584	0.1156	0.171	0.139	0.1142	0.1427			443.6	0.0731	0.0553	0.0366	0.1082
																														444	0.0897	0.1119	0.0878	0.1397	0.1205	0.1293	0.1585	0.1157	0.172	0.1384	0.1145	0.1425			444	0.0725	0.0551	0.0369	0.1084
																														444.4	0.0913	0.1129	0.0873	0.1387	0.12	0.13	0.1575	0.1159	0.172	0.1385	0.1135	0.1422			444.4	0.0721	0.055	0.0368	0.1087
																														444.8	0.0902	0.1128	0.0871	0.1393	0.1195	0.1292	0.1581	0.115	0.1718	0.1384	0.1139	0.1426			444.8	0.0731	0.0559	0.0363	0.1086
																														445.2	0.0895	0.1126	0.0883	0.1403	0.1197	0.1299	0.1591	0.1158	0.1721	0.1387	0.1152	0.1433			445.2	0.0721	0.0558	0.0363	0.1082
																														445.6	0.0908	0.1125	0.0885	0.1396	0.1198	0.1293	0.1584	0.1153	0.1728	0.1376	0.1149	0.1428			445.6	0.072	0.0561	0.0373	0.1086
																														446	0.0905	0.1136	0.0887	0.14	0.1199	0.129	0.1588	0.1151	0.1716	0.1379	0.1144	0.1425			446	0.0721	0.0555	0.0376	0.1091
																														446.4	0.0907	0.113	0.088	0.1394	0.1198	0.13	0.1582	0.1158	0.1719	0.138	0.1145	0.1416			446.4	0.0731	0.0553	0.0373	0.1092
																														446.8	0.0902	0.113	0.0873	0.1389	0.1196	0.129	0.1577	0.116	0.1715	0.1373	0.1144	0.1425			446.8	0.0726	0.0564	0.0366	0.1092
																														447.2	0.0895	0.1127	0.0876	0.14	0.1189	0.1304	0.1588	0.1153	0.1716	0.1382	0.1146	0.1425			447.2	0.0725	0.0558	0.0374	0.1085
																														447.6	0.0903	0.1132	0.0881	0.139	0.1193	0.1301	0.1578	0.1153	0.1713	0.1388	0.1152	0.143			447.6	0.0728	0.0565	0.037	0.1101
																														448	0.0907	0.1136	0.0885	0.1402	0.1198	0.1299	0.159	0.1153	0.1719	0.1389	0.1146	0.1432			448	0.0725	0.0559	0.0375	0.1078
																														448.4	0.0901	0.1127	0.0878	0.1399	0.1198	0.1292	0.1587	0.1157	0.1713	0.1383	0.1141	0.1421			448.4	0.0732	0.0564	0.0377	0.1093
																														448.8	0.0904	0.1126	0.0879	0.1397	0.1198	0.1292	0.1585	0.116	0.1711	0.1392	0.115	0.1426			448.8	0.073	0.0558	0.0375	0.1101
																														449.2	0.0901	0.1134	0.0886	0.1388	0.1198	0.1299	0.1576	0.1161	0.1719	0.138	0.1144	0.1423			449.2	0.0732	0.0569	0.0372	0.1098
																														449.6	0.091	0.113	0.0885	0.1392	0.1202	0.1299	0.158	0.1153	0.1719	0.1388	0.1144	0.1428			449.6	0.0731	0.056	0.0364	0.1098
																														450	0.0911	0.1136	0.0888	0.139	0.1189	0.1307	0.1578	0.115	0.1721	0.1396	0.1148	0.1421			450	0.0727	0.0566	0.0375	0.1088
																														450.4	0.0907	0.1137	0.0882	0.139	0.1191	0.1292	0.1578	0.1158	0.1709	0.1373	0.1149	0.1427			450.4	0.0734	0.0553	0.0367	0.1091
																														450.8	0.0909	0.113	0.0884	0.1394	0.1194	0.1294	0.1582	0.1153	0.1717	0.1383	0.114	0.1423			450.8	0.0739	0.056	0.0373	0.1083
																														451.2	0.0905	0.1138	0.089	0.1397	0.1209	0.1301	0.1585	0.1162	0.1715	0.138	0.1148	0.1428			451.2	0.0738	0.0558	0.0372	0.1098
																														451.6	0.0916	0.1133	0.0886	0.139	0.1191	0.1303	0.1578	0.1156	0.1723	0.1381	0.1143	0.1412			451.6	0.0728	0.0559	0.0373	0.1087
																														452	0.0908	0.1136	0.0879	0.1402	0.12	0.1301	0.159	0.1152	0.1716	0.1381	0.1144	0.1427			452	0.0738	0.0561	0.0367	0.1093
																														452.4	0.0911	0.1125	0.0884	0.1394	0.1204	0.1302	0.1582	0.1146	0.1721	0.1386	0.115	0.1431			452.4	0.0734	0.0566	0.0366	0.1092
																														452.8	0.0901	0.1126	0.0897	0.14	0.1193	0.1299	0.1588	0.1151	0.1713	0.1384	0.1144	0.1433			452.8	0.0726	0.057	0.0373	0.1087
																														453.2	0.091	0.1136	0.0892	0.1399	0.1192	0.1297	0.1587	0.1152	0.1708	0.1377	0.1142	0.1427			453.2	0.0734	0.0567	0.0374	0.1095
																														453.6	0.0914	0.1132	0.0892	0.1406	0.1197	0.1308	0.1594	0.1163	0.1705	0.1383	0.1149	0.1433			453.6	0.0723	0.0564	0.0373	0.1088
																														454	0.0912	0.1134	0.0883	0.1392	0.121	0.1301	0.158	0.1151	0.1711	0.1379	0.1141	0.143			454	0.0731	0.0557	0.0373	0.1095
																														454.4	0.0908	0.1138	0.0883	0.1393	0.1209	0.1311	0.1581	0.115	0.1709	0.1385	0.1152	0.1423			454.4	0.0734	0.0569	0.0373	0.1088
																														454.8	0.0909	0.113	0.0891	0.1401	0.1191	0.1291	0.1589	0.115	0.1722	0.1383	0.1145	0.1425			454.8	0.0734	0.0559	0.037	0.1094
																														455.2	0.0909	0.1135	0.0889	0.1388	0.1205	0.1304	0.1576	0.1148	0.1716	0.1375	0.1144	0.1431			455.2	0.0737	0.0559	0.0377	0.11
																														455.6	0.0908	0.1135	0.0892	0.1396	0.1201	0.1301	0.1584	0.1155	0.1702	0.139	0.1138	0.1419			455.6	0.0743	0.056	0.0376	0.1089
																														456	0.0915	0.1135	0.0891	0.1399	0.1204	0.1297	0.1587	0.1156	0.1716	0.1377	0.114	0.1426			456	0.0741	0.0562	0.0371	0.11
																														456.4	0.0916	0.1137	0.0888	0.1395	0.1206	0.1301	0.1583	0.1155	0.1721	0.1387	0.1132	0.1422			456.4	0.0727	0.0563	0.0372	0.1101
																														456.8	0.0907	0.1135	0.0885	0.1393	0.1204	0.1313	0.1581	0.1155	0.1722	0.1385	0.1142	0.1424			456.8	0.0732	0.0566	0.0376	0.1081
																														457.2	0.0917	0.1134	0.0891	0.1396	0.12	0.1295	0.1584	0.1142	0.1714	0.1375	0.1151	0.1426			457.2	0.0741	0.057	0.0375	0.1086
																														457.6	0.0905	0.1138	0.0889	0.1404	0.12	0.1296	0.1592	0.1145	0.1707	0.1377	0.1144	0.1429			457.6	0.0734	0.0563	0.0379	0.1094
																														458	0.0921	0.1141	0.0888	0.14	0.1195	0.1301	0.1588	0.1154	0.1714	0.1371	0.1138	0.1437			458	0.0738	0.0565	0.0373	0.109
																														458.4	0.0908	0.1132	0.0893	0.139	0.12	0.1304	0.1578	0.1148	0.1709	0.1383	0.1142	0.1428			458.4	0.0739	0.0558	0.038	0.1098
																														458.8	0.0921	0.1139	0.0894	0.1388	0.1197	0.1304	0.1576	0.1151	0.1716	0.138	0.1146	0.1424			458.8	0.073	0.0566	0.0381	0.1088
																														459.2	0.0914	0.113	0.0899	0.1403	0.1195	0.1301	0.1591	0.1147	0.1709	0.1385	0.1144	0.1421			459.2	0.0736	0.0567	0.0376	0.1099
																														459.6	0.0918	0.1133	0.0886	0.1395	0.1194	0.1306	0.1583	0.1151	0.1715	0.1388	0.1145	0.141			459.6	0.0744	0.0566	0.0376	0.1092
																														460	0.0915	0.1139	0.0902	0.1399	0.1199	0.1291	0.1587	0.1146	0.1717	0.1386	0.1144	0.1427			460	0.0732	0.0566	0.038	0.1088
																														460.4	0.0915	0.1138	0.0904	0.1392	0.1193	0.1307	0.158	0.1155	0.1722	0.1398	0.1141	0.1427			460.4	0.0746	0.0579	0.0376	0.1096
																														460.8	0.0912	0.1139	0.0907	0.1394	0.1195	0.1304	0.1582	0.1145	0.1718	0.1381	0.1147	0.143			460.8	0.0732	0.0566	0.0381	0.1088
																														461.2	0.0923	0.115	0.0894	0.1397	0.1207	0.1311	0.1585	0.1162	0.1716	0.1385	0.1132	0.1423			461.2	0.0748	0.0567	0.0374	0.1104
																														461.6	0.0909	0.1142	0.0891	0.1401	0.1198	0.1306	0.1589	0.1154	0.171	0.1371	0.1151	0.1431			461.6	0.0741	0.0566	0.0373	0.1098
																														462	0.0916	0.114	0.0901	0.1388	0.1208	0.1309	0.1576	0.115	0.1723	0.1402	0.1143	0.1427			462	0.0745	0.0572	0.0369	0.1093
																														462.4	0.0918	0.1135	0.0899	0.1395	0.1204	0.1305	0.1583	0.1155	0.1711	0.1383	0.1143	0.1425			462.4	0.0737	0.0563	0.038	0.1101
																														462.8	0.0907	0.1138	0.0894	0.1402	0.1199	0.1309	0.159	0.1149	0.1725	0.1379	0.114	0.1422			462.8	0.0745	0.0568	0.0378	0.1094
																														463.2	0.0928	0.1146	0.0902	0.1402	0.1193	0.1302	0.159	0.1159	0.1725	0.1382	0.1138	0.143			463.2	0.0741	0.0564	0.038	0.1106
																														463.6	0.0917	0.1149	0.0882	0.1385	0.1204	0.131	0.1573	0.1159	0.1716	0.1392	0.1144	0.1433			463.6	0.0741	0.0567	0.038	0.1094
																														464	0.0925	0.1151	0.0897	0.139	0.1206	0.1304	0.1578	0.1161	0.1718	0.138	0.1155	0.143			464	0.0738	0.0573	0.0369	0.1089
																														464.4	0.0919	0.1138	0.0902	0.1388	0.1203	0.1306	0.1576	0.1149	0.1717	0.1385	0.1148	0.1426			464.4	0.0742	0.0577	0.0384	0.1096
																														464.8	0.0927	0.1147	0.09	0.1397	0.1197	0.1313	0.1585	0.1151	0.1718	0.138	0.1148	0.1426			464.8	0.0743	0.057	0.0372	0.1096
																														465.2	0.0924	0.1135	0.0899	0.1388	0.1195	0.1316	0.1576	0.1155	0.1722	0.1381	0.1145	0.1424			465.2	0.0735	0.0566	0.0376	0.1097
																														465.6	0.0925	0.1146	0.0902	0.1399	0.1198	0.1309	0.1587	0.1159	0.1718	0.138	0.115	0.1429			465.6	0.0741	0.0566	0.0379	0.1099
																														466	0.0921	0.1142	0.0904	0.1395	0.1201	0.1305	0.1583	0.1156	0.171	0.138	0.1142	0.1428			466	0.0747	0.0576	0.038	0.109
																														466.4	0.0931	0.1146	0.09	0.1387	0.1205	0.1308	0.1575	0.1151	0.171	0.1394	0.1147	0.1431			466.4	0.0744	0.0586	0.0379	0.1095
																														466.8	0.093	0.1134	0.0899	0.1403	0.1203	0.1304	0.1591	0.1141	0.1722	0.1385	0.1137	0.1421			466.8	0.0754	0.0589	0.0374	0.1104
																														467.2	0.0926	0.1154	0.0905	0.1399	0.1208	0.1309	0.1587	0.1153	0.1707	0.1381	0.115	0.1431			467.2	0.0731	0.058	0.0376	0.1098
																														467.6	0.0925	0.1141	0.0902	0.1401	0.1194	0.1297	0.1589	0.1149	0.1716	0.1387	0.1152	0.1419			467.6	0.0742	0.0577	0.0385	0.1096
																														468	0.0923	0.1137	0.0901	0.14	0.1201	0.1308	0.1588	0.1154	0.1719	0.1389	0.1154	0.1437			468	0.0738	0.0571	0.0375	0.1097
																														468.4	0.0931	0.1141	0.0907	0.1391	0.1195	0.1314	0.1579	0.1156	0.1717	0.138	0.1148	0.1428			468.4	0.0749	0.0575	0.0383	0.1103
																														468.8	0.0924	0.1152	0.0902	0.1388	0.1201	0.1307	0.1576	0.1158	0.1717	0.1377	0.115	0.1429			468.8	0.0747	0.0574	0.0377	0.1095
																														469.2	0.0926	0.1146	0.0906	0.1399	0.1194	0.1315	0.1587	0.116	0.1712	0.1378	0.1143	0.1427			469.2	0.0739	0.0577	0.0378	0.1103
																														469.6	0.092	0.1137	0.0904	0.1391	0.1207	0.1314	0.1579	0.1153	0.1715	0.1372	0.1137	0.1424			469.6	0.0741	0.0572	0.0374	0.1107
																														470	0.0919	0.1144	0.0892	0.14	0.1201	0.1316	0.1588	0.1155	0.1714	0.1377	0.114	0.1434			470	0.0752	0.057	0.0384	0.1104
																														470.4	0.0926	0.1147	0.0906	0.1393	0.1183	0.1307	0.1581	0.1157	0.1725	0.139	0.1139	0.1429			470.4	0.0741	0.058	0.038	0.1107
																														470.8	0.0917	0.1152	0.0902	0.1398	0.1194	0.1317	0.1586	0.1151	0.1716	0.1365	0.1149	0.142			470.8	0.0744	0.0578	0.039	0.1096
																														471.2	0.0924	0.1152	0.0912	0.1397	0.1207	0.1316	0.1585	0.1157	0.172	0.138	0.1155	0.1429			471.2	0.0747	0.0567	0.0387	0.1094
																														471.6	0.0928	0.1141	0.0906	0.1397	0.1199	0.1317	0.1585	0.1145	0.1723	0.1367	0.1137	0.1424			471.6	0.0754	0.0571	0.0379	0.1097
																														472	0.0929	0.1147	0.0907	0.1396	0.1192	0.1311	0.1584	0.1159	0.1714	0.1385	0.1143	0.1424			472	0.0752	0.0571	0.0376	0.1099
																														472.4	0.0917	0.1152	0.0902	0.1394	0.12	0.1318	0.1582	0.1151	0.1721	0.1376	0.1144	0.1421			472.4	0.0751	0.058	0.0385	0.1101
																														472.8	0.0927	0.1156	0.0901	0.1402	0.1204	0.1313	0.159	0.1152	0.1731	0.138	0.1155	0.1424			472.8	0.0742	0.0572	0.0382	0.11
																														473.2	0.0926	0.1146	0.0908	0.1399	0.119	0.1311	0.1587	0.1154	0.1723	0.1361	0.1147	0.1419			473.2	0.0755	0.0579	0.0376	0.1095
																														473.6	0.0926	0.1151	0.0912	0.1399	0.1199	0.1308	0.1587	0.1153	0.1721	0.1378	0.1143	0.1433			473.6	0.0756	0.0578	0.0383	0.1099
																														474	0.0933	0.1149	0.0912	0.1396	0.1195	0.132	0.1584	0.1147	0.1719	0.1368	0.1142	0.142			474	0.0751	0.0581	0.0378	0.1105
																														474.4	0.0926	0.1147	0.0911	0.1399	0.1204	0.1307	0.1587	0.1145	0.172	0.1384	0.1142	0.1424			474.4	0.0754	0.0576	0.0381	0.1109
																														474.8	0.0932	0.1155	0.0914	0.1397	0.1197	0.1309	0.1585	0.1157	0.1723	0.1379	0.1141	0.1422			474.8	0.0747	0.0575	0.0376	0.1104
																														475.2	0.0931	0.1145	0.0913	0.1399	0.1193	0.1305	0.1587	0.1155	0.1715	0.1397	0.1152	0.1427			475.2	0.0757	0.0575	0.0383	0.1102
																														475.6	0.0939	0.1148	0.0904	0.1404	0.12	0.1312	0.1592	0.1158	0.1721	0.1372	0.1135	0.143			475.6	0.0751	0.0582	0.038	0.1097
																														476	0.0929	0.1157	0.092	0.14	0.1193	0.1325	0.1588	0.1145	0.1717	0.1385	0.1148	0.1422			476	0.0757	0.0587	0.0383	0.1094
																														476.4	0.0929	0.1157	0.0901	0.1391	0.12	0.1319	0.1579	0.1156	0.1715	0.1376	0.1142	0.1427			476.4	0.0755	0.0585	0.0383	0.1105
																														476.8	0.0927	0.1151	0.0907	0.1403	0.1197	0.131	0.1591	0.1152	0.1724	0.1386	0.1149	0.1436			476.8	0.0754	0.0582	0.0381	0.1109
																														477.2	0.093	0.1146	0.0903	0.1407	0.1212	0.1305	0.1595	0.1159	0.1716	0.1387	0.1142	0.1426			477.2	0.0742	0.0571	0.0382	0.1108
																														477.6	0.0924	0.1154	0.0913	0.1405	0.1201	0.1313	0.1593	0.1154	0.1712	0.1384	0.1139	0.1421			477.6	0.075	0.0581	0.0382	0.1092
																														478	0.0932	0.1139	0.0917	0.1395	0.1194	0.131	0.1583	0.1152	0.1721	0.1384	0.1138	0.1426			478	0.075	0.0574	0.0385	0.1112
																														478.4	0.093	0.1147	0.0911	0.1397	0.1199	0.1318	0.1585	0.1158	0.1725	0.1386	0.114	0.1423			478.4	0.0753	0.0587	0.0377	0.1101
																														478.8	0.0938	0.1167	0.0916	0.1394	0.1196	0.1306	0.1582	0.1146	0.1713	0.1379	0.1136	0.1434			478.8	0.0757	0.0588	0.039	0.1106
																														479.2	0.0927	0.115	0.0907	0.1398	0.1201	0.1314	0.1586	0.1144	0.1723	0.1392	0.1146	0.1424			479.2	0.0752	0.0585	0.0383	0.1095
																														479.6	0.0932	0.1154	0.0915	0.1393	0.1196	0.1308	0.1581	0.1147	0.1712	0.1382	0.1138	0.143			479.6	0.0749	0.0585	0.0383	0.1104
																														480	0.0932	0.1151	0.0909	0.1405	0.12	0.1311	0.1593	0.1159	0.1708	0.1371	0.1148	0.1419			480	0.0759	0.0584	0.0383	0.1109
																														480.4	0.0938	0.1152	0.0919	0.1398	0.1201	0.1316	0.1586	0.115	0.1709	0.1389	0.1149	0.142			480.4	0.0753	0.059	0.0389	0.1097
																														480.8	0.0934	0.1154	0.0916	0.1405	0.1203	0.1322	0.1593	0.1152	0.1718	0.1384	0.1148	0.1418			480.8	0.0761	0.0581	0.0385	0.1108
																														481.2	0.0926	0.1152	0.0906	0.1404	0.12	0.1312	0.1592	0.1154	0.1715	0.1377	0.1138	0.1429			481.2	0.0751	0.0584	0.0383	0.1105
																														481.6	0.0938	0.1156	0.0913	0.1386	0.1194	0.1312	0.1574	0.1146	0.1722	0.1367	0.1148	0.1424			481.6	0.0753	0.0581	0.0391	0.1111
																														482	0.0928	0.1163	0.0915	0.1395	0.1205	0.1312	0.1583	0.115	0.1721	0.1386	0.1143	0.1429			482	0.0754	0.0586	0.0384	0.1096
																														482.4	0.0938	0.1148	0.0922	0.1387	0.1198	0.1314	0.1575	0.1158	0.1719	0.1373	0.115	0.1422			482.4	0.0764	0.0575	0.0388	0.1109
																														482.8	0.0935	0.1153	0.0908	0.1401	0.1201	0.1316	0.1589	0.1153	0.1723	0.1389	0.1141	0.1423			482.8	0.0755	0.0584	0.0388	0.1106
																														483.2	0.0934	0.1149	0.0921	0.1403	0.1194	0.132	0.1591	0.115	0.1717	0.1381	0.1144	0.1422			483.2	0.0762	0.0581	0.0385	0.111
																														483.6	0.093	0.1157	0.091	0.1396	0.1207	0.1317	0.1584	0.115	0.1716	0.1382	0.114	0.142			483.6	0.0758	0.059	0.0392	0.1102
																														484	0.094	0.1159	0.0913	0.1391	0.1203	0.1317	0.1579	0.1144	0.1708	0.1377	0.1144	0.1438			484	0.0759	0.0582	0.0385	0.1108
																														484.4	0.0936	0.1159	0.0918	0.1397	0.1207	0.1318	0.1585	0.1153	0.1717	0.137	0.1133	0.1432			484.4	0.0759	0.0584	0.0384	0.1103
																														484.8	0.0945	0.1155	0.0926	0.1393	0.1201	0.1318	0.1581	0.1153	0.1716	0.1377	0.1146	0.1425			484.8	0.0765	0.0581	0.0382	0.1111
																														485.2	0.0934	0.1156	0.0917	0.14	0.1209	0.1317	0.1588	0.1159	0.1719	0.1383	0.1139	0.1428			485.2	0.0762	0.0595	0.0389	0.11
																														485.6	0.0931	0.115	0.091	0.1402	0.1206	0.1317	0.159	0.1143	0.1723	0.1383	0.1147	0.1436			485.6	0.0758	0.0592	0.0392	0.1108
																														486	0.0932	0.1161	0.0917	0.1402	0.1195	0.1314	0.159	0.115	0.1713	0.138	0.1141	0.1423			486	0.077	0.0587	0.0393	0.1107
																														486.4	0.0933	0.1167	0.0911	0.1383	0.1203	0.1321	0.1571	0.1155	0.172	0.139	0.1145	0.142			486.4	0.0753	0.0592	0.0387	0.1106
																														486.8	0.0934	0.1158	0.0921	0.1406	0.1207	0.133	0.1594	0.1146	0.1715	0.1373	0.1163	0.1428			486.8	0.0747	0.0588	0.0383	0.1112
																														487.2	0.0944	0.1167	0.0922	0.1385	0.1195	0.1325	0.1573	0.115	0.1726	0.1379	0.114	0.1433			487.2	0.0753	0.058	0.0393	0.1108
																														487.6	0.094	0.1154	0.0922	0.1403	0.1201	0.1329	0.1591	0.115	0.1716	0.1376	0.1139	0.143			487.6	0.0765	0.0585	0.0384	0.1105
																														488	0.0938	0.115	0.0924	0.1406	0.1202	0.1326	0.1594	0.1152	0.172	0.1371	0.1148	0.1419			488	0.0763	0.0591	0.039	0.1116
																														488.4	0.0941	0.1156	0.0912	0.1397	0.1198	0.1323	0.1585	0.1154	0.1726	0.1383	0.114	0.1424			488.4	0.0766	0.059	0.0381	0.1106
																														488.8	0.0938	0.1158	0.0924	0.1394	0.1201	0.1318	0.1582	0.1154	0.1723	0.1368	0.115	0.143			488.8	0.0767	0.0592	0.039	0.1109
																														489.2	0.0929	0.1155	0.0922	0.1397	0.1205	0.132	0.1585	0.1151	0.1712	0.1379	0.1142	0.1428			489.2	0.077	0.0585	0.0388	0.1104
																														489.6	0.094	0.1165	0.0923	0.1401	0.1206	0.1316	0.1589	0.115	0.1723	0.1379	0.1149	0.1427			489.6	0.0755	0.058	0.0386	0.1102
																														490	0.0935	0.1155	0.0919	0.1402	0.1195	0.1309	0.159	0.1152	0.1722	0.1381	0.1143	0.1427			490	0.0758	0.0585	0.0404	0.1107
																														490.4	0.0937	0.1163	0.0921	0.1392	0.1203	0.131	0.158	0.1149	0.1703	0.1384	0.1147	0.1433			490.4	0.0756	0.0591	0.0384	0.1112
																														490.8	0.0943	0.1153	0.0917	0.1396	0.1211	0.132	0.1584	0.1146	0.171	0.1382	0.1147	0.1421			490.8	0.076	0.0598	0.0399	0.1107
																														491.2	0.0942	0.1162	0.0919	0.1397	0.1198	0.1319	0.1585	0.1144	0.1726	0.1382	0.1147	0.1422			491.2	0.0759	0.059	0.0382	0.11
																														491.6	0.0945	0.1159	0.0924	0.1408	0.1194	0.1319	0.1596	0.1163	0.1728	0.1373	0.1146	0.1423			491.6	0.077	0.0588	0.0394	0.1111
																														492	0.0939	0.1166	0.092	0.1389	0.1207	0.1324	0.1577	0.1151	0.1718	0.137	0.1139	0.1434			492	0.0763	0.0583	0.039	0.1107
																														492.4	0.0941	0.1163	0.0917	0.1392	0.1203	0.1322	0.158	0.1148	0.171	0.1371	0.1139	0.1427			492.4	0.0775	0.0588	0.0389	0.111
																														492.8	0.094	0.1158	0.0921	0.1402	0.1193	0.1318	0.159	0.1151	0.1719	0.1383	0.1143	0.1436			492.8	0.0771	0.0591	0.0399	0.1108
																														493.2	0.0943	0.1154	0.0918	0.1401	0.1198	0.1314	0.1589	0.1144	0.171	0.1369	0.1145	0.1421			493.2	0.0765	0.0583	0.0388	0.1118
																														493.6	0.0939	0.1167	0.0925	0.1398	0.1196	0.1319	0.1586	0.1152	0.1712	0.1371	0.115	0.1426			493.6	0.0764	0.0585	0.0384	0.1107
																														494	0.0948	0.1156	0.0923	0.1393	0.1201	0.1322	0.1581	0.115	0.1722	0.1377	0.1145	0.1426			494	0.0765	0.0587	0.0382	0.1113
																														494.4	0.0946	0.1164	0.0926	0.1399	0.1207	0.1319	0.1587	0.115	0.172	0.1375	0.1138	0.1427			494.4	0.0768	0.0593	0.0397	0.1108
																														494.8	0.0941	0.1177	0.0928	0.1401	0.1196	0.1324	0.1589	0.1144	0.1708	0.1382	0.114	0.1429			494.8	0.0771	0.0591	0.0391	0.1116
																														495.2	0.0944	0.1158	0.0925	0.14	0.1196	0.1324	0.1588	0.115	0.1721	0.1373	0.1142	0.1426			495.2	0.0777	0.0603	0.039	0.1111
																														495.6	0.0938	0.117	0.0919	0.1382	0.1195	0.1325	0.157	0.115	0.1715	0.1377	0.1151	0.1417			495.6	0.0761	0.0596	0.0397	0.1098
																														496	0.0943	0.1157	0.0935	0.1391	0.1206	0.1319	0.1579	0.1147	0.1716	0.1379	0.1148	0.1425			496	0.0768	0.0596	0.0388	0.1108
																														496.4	0.0946	0.1166	0.0927	0.1388	0.1207	0.1327	0.1576	0.115	0.1719	0.1379	0.114	0.1423			496.4	0.0768	0.0586	0.0392	0.1101
																														496.8	0.0949	0.1162	0.0936	0.1408	0.1203	0.131	0.1596	0.1151	0.1725	0.1373	0.1149	0.1427			496.8	0.0768	0.0587	0.039	0.111
																														497.2	0.0941	0.1169	0.0921	0.1402	0.1205	0.1324	0.159	0.1148	0.1714	0.1369	0.1141	0.1426			497.2	0.0769	0.0598	0.0396	0.1115
																														497.6	0.0945	0.1166	0.0931	0.14	0.1195	0.1322	0.1588	0.115	0.1722	0.1366	0.1142	0.1427			497.6	0.0768	0.0588	0.0392	0.1116
																														498	0.0946	0.1164	0.0925	0.1398	0.1202	0.133	0.1586	0.1151	0.1724	0.137	0.1149	0.1423			498	0.0766	0.0591	0.0393	0.1111
																														498.4	0.0944	0.1163	0.093	0.14	0.1198	0.1321	0.1588	0.1154	0.1721	0.1369	0.1144	0.1422			498.4	0.0767	0.0598	0.0394	0.1107
																														498.8	0.0942	0.1168	0.093	0.1395	0.12	0.1327	0.1583	0.1152	0.1712	0.1382	0.1146	0.141			498.8	0.0771	0.0593	0.0389	0.1116
																														499.2	0.0945	0.1161	0.0928	0.1394	0.1202	0.1323	0.1582	0.1158	0.1713	0.138	0.1134	0.1422			499.2	0.0768	0.0594	0.0396	0.1106
																														499.6	0.0938	0.1161	0.0924	0.1402	0.1203	0.1323	0.159	0.1151	0.1708	0.1375	0.1145	0.1422			499.6	0.0764	0.0593	0.0395	0.1114
																														500	0.0949	0.1163	0.0929	0.1397	0.1206	0.1325	0.1585	0.1155	0.1724	0.1374	0.1145	0.1433			500	0.0765	0.06	0.0401	0.1117
																														500.4	0.0948	0.1166	0.093	0.1406	0.1198	0.1331	0.1594	0.1143	0.1716	0.1369	0.1147	0.1429			500.4	0.0779	0.0598	0.0394	0.1103
																														500.8	0.0947	0.1165	0.0925	0.14	0.1206	0.1327	0.1588	0.1146	0.1736	0.1363	0.1148	0.1429			500.8	0.0765	0.0595	0.0398	0.1114
																														501.2	0.0951	0.116	0.0934	0.1399	0.1197	0.1329	0.1587	0.1155	0.1712	0.1367	0.1146	0.1425			501.2	0.0782	0.0593	0.0392	0.1118
																														501.6	0.0945	0.1164	0.093	0.1396	0.1207	0.1326	0.1584	0.1151	0.1707	0.137	0.1138	0.1425			501.6	0.0771	0.0589	0.0395	0.1118
																														502	0.0951	0.1164	0.093	0.1397	0.1203	0.1322	0.1585	0.1151	0.1715	0.1379	0.1143	0.1429			502	0.0765	0.0589	0.0395	0.1115
																														502.4	0.0946	0.1171	0.0936	0.1387	0.1207	0.1318	0.1575	0.1145	0.1717	0.1388	0.1141	0.1433			502.4	0.0772	0.0604	0.0404	0.1114
																														502.8	0.0944	0.117	0.0933	0.1401	0.1201	0.1327	0.1589	0.1142	0.1719	0.1369	0.1144	0.1425			502.8	0.0772	0.0595	0.0391	0.1112
																														503.2	0.0951	0.1169	0.0937	0.1392	0.1193	0.1325	0.158	0.1147	0.1713	0.138	0.1148	0.1433			503.2	0.077	0.0598	0.0397	0.112
																														503.6	0.0952	0.1173	0.0935	0.1393	0.1215	0.1323	0.1581	0.1148	0.172	0.1371	0.1164	0.1423			503.6	0.0772	0.0593	0.0395	0.1119
																														504	0.0955	0.1169	0.094	0.1395	0.1199	0.1326	0.1583	0.1148	0.1725	0.1373	0.1141	0.1419			504	0.0781	0.06	0.0395	0.1126
																														504.4	0.0951	0.1172	0.0933	0.1404	0.121	0.1333	0.1592	0.1151	0.1719	0.1374	0.114	0.1434			504.4	0.0789	0.0592	0.0396	0.1107
																														504.8	0.0947	0.1166	0.0941	0.1406	0.1208	0.1321	0.1594	0.1147	0.1718	0.1373	0.1139	0.1432			504.8	0.0784	0.0597	0.0404	0.1117
																														505.2	0.0951	0.1179	0.0938	0.1398	0.1195	0.1331	0.1586	0.1144	0.1727	0.1376	0.1155	0.1438			505.2	0.0767	0.0597	0.0395	0.1114
																														505.6	0.0941	0.1174	0.0941	0.1394	0.1196	0.1325	0.1582	0.115	0.1714	0.1371	0.1154	0.1435			505.6	0.0777	0.0599	0.039	0.1117
																														506	0.0948	0.1171	0.0934	0.1402	0.121	0.1333	0.159	0.1148	0.1717	0.1376	0.1144	0.1422			506	0.0773	0.0601	0.0399	0.1119
																														506.4	0.0949	0.1158	0.093	0.1403	0.1205	0.1324	0.1591	0.1158	0.1721	0.137	0.1144	0.1424			506.4	0.0784	0.0592	0.0398	0.1123
																														506.8	0.0951	0.1174	0.0937	0.1394	0.1207	0.1335	0.1582	0.1142	0.172	0.1377	0.1145	0.1425			506.8	0.0781	0.0598	0.0402	0.1116
																														507.2	0.0952	0.1156	0.0938	0.1402	0.12	0.1327	0.159	0.1142	0.1714	0.1386	0.1142	0.1432			507.2	0.0779	0.0607	0.0399	0.111
																														507.6	0.0947	0.1176	0.0932	0.1385	0.1213	0.1337	0.1573	0.1142	0.1719	0.1376	0.116	0.1432			507.6	0.0768	0.0599	0.0399	0.1117
																														508	0.0949	0.1176	0.0941	0.1401	0.12	0.1322	0.1589	0.1147	0.1718	0.1375	0.1138	0.143			508	0.0774	0.0608	0.0402	0.1111
																														508.4	0.0948	0.1175	0.0933	0.1396	0.1205	0.1325	0.1584	0.1149	0.1722	0.1372	0.1149	0.1419			508.4	0.0783	0.0595	0.0398	0.112
																														508.8	0.0953	0.1167	0.094	0.1396	0.1203	0.133	0.1584	0.1151	0.1725	0.1365	0.1146	0.1428			508.8	0.0776	0.0602	0.0401	0.1111
																														509.2	0.0959	0.1159	0.0937	0.1396	0.1206	0.1327	0.1584	0.1145	0.1725	0.1369	0.1149	0.1421			509.2	0.078	0.0602	0.0394	0.1116
																														509.6	0.0948	0.1163	0.095	0.1398	0.1202	0.1333	0.1586	0.1143	0.1721	0.1374	0.1148	0.143			509.6	0.0792	0.0605	0.0395	0.1104
																														510	0.0956	0.1172	0.0941	0.1396	0.1208	0.1322	0.1584	0.1147	0.1725	0.1383	0.1149	0.1424			510	0.0779	0.0595	0.0399	0.112
																														510.4	0.0952	0.1173	0.0937	0.1394	0.1205	0.1329	0.1582	0.1147	0.1721	0.1373	0.1147	0.1429			510.4	0.0784	0.0602	0.0401	0.1114
																														510.8	0.0952	0.1173	0.094	0.1396	0.1203	0.1325	0.1584	0.1147	0.1714	0.1376	0.1143	0.1416			510.8	0.0771	0.0604	0.04	0.1121
																														511.2	0.096	0.1172	0.0937	0.1393	0.1201	0.1326	0.1581	0.114	0.1725	0.1375	0.114	0.1426			511.2	0.0802	0.0599	0.0399	0.1115
																														511.6	0.0953	0.117	0.0951	0.1405	0.1204	0.1325	0.1593	0.1157	0.1703	0.1368	0.1142	0.1425			511.6	0.0781	0.0599	0.0403	0.1109
																														512	0.0952	0.118	0.0944	0.14	0.1209	0.1328	0.1588	0.1155	0.1721	0.1372	0.1145	0.1422			512	0.0784	0.0607	0.0407	0.1123
																														512.4	0.0949	0.1171	0.0953	0.1406	0.1199	0.1332	0.1594	0.1143	0.1717	0.1376	0.1147	0.1429			512.4	0.0779	0.0599	0.0402	0.1124
																														512.8	0.0952	0.1174	0.094	0.1398	0.1195	0.1332	0.1586	0.1148	0.1722	0.138	0.1146	0.1425			512.8	0.079	0.0601	0.0396	0.1115
																														513.2	0.0955	0.1176	0.0934	0.1398	0.1193	0.1333	0.1586	0.1146	0.1725	0.1389	0.1147	0.1432			513.2	0.0778	0.0603	0.0401	0.1119
																														513.6	0.0957	0.1177	0.0933	0.1397	0.1197	0.1331	0.1585	0.1152	0.1712	0.1373	0.1144	0.1425			513.6	0.0788	0.0609	0.0396	0.1121
																														514	0.0957	0.117	0.0948	0.1401	0.1201	0.1338	0.1589	0.1141	0.1719	0.138	0.1144	0.1426			514	0.0787	0.0592	0.04	0.1113
																														514.4	0.0952	0.117	0.0935	0.1402	0.1207	0.1327	0.159	0.1144	0.1712	0.1377	0.1139	0.1431			514.4	0.0782	0.0601	0.0407	0.1118
																														514.8	0.0947	0.1172	0.0942	0.1395	0.1197	0.1325	0.1583	0.1147	0.1716	0.1375	0.1145	0.1426			514.8	0.0783	0.0614	0.0411	0.1123
																														515.2	0.0963	0.1163	0.0938	0.1399	0.1198	0.132	0.1587	0.1145	0.1713	0.1372	0.1151	0.143			515.2	0.0785	0.061	0.0397	0.112
																														515.6	0.0959	0.1177	0.095	0.1397	0.1196	0.1328	0.1585	0.1151	0.1719	0.1383	0.1144	0.1435			515.6	0.0776	0.0609	0.0409	0.1111
																														516	0.0958	0.1173	0.0944	0.1398	0.12	0.1327	0.1586	0.1145	0.1722	0.1369	0.1134	0.142			516	0.0789	0.0602	0.0402	0.112
																														516.4	0.0953	0.1176	0.0942	0.1395	0.1202	0.1332	0.1583	0.1144	0.1723	0.138	0.1152	0.1427			516.4	0.0782	0.0608	0.0407	0.1122
																														516.8	0.0949	0.1167	0.0949	0.1401	0.1206	0.1323	0.1589	0.1154	0.1721	0.1385	0.1144	0.1419			516.8	0.0787	0.0605	0.0404	0.1124
																														517.2	0.0952	0.1176	0.0946	0.1396	0.12	0.1332	0.1584	0.1149	0.1719	0.1375	0.1139	0.1424			517.2	0.0782	0.061	0.0407	0.1122
																														517.6	0.0957	0.1167	0.0953	0.1395	0.1207	0.1329	0.1583	0.1143	0.173	0.1375	0.1149	0.1425			517.6	0.0782	0.0616	0.0406	0.112
																														518	0.0972	0.117	0.0946	0.1391	0.1193	0.1327	0.1579	0.1147	0.1723	0.1373	0.1145	0.1425			518	0.0783	0.0605	0.0397	0.1124
																														518.4	0.0957	0.1178	0.0945	0.1401	0.121	0.1331	0.1589	0.115	0.1708	0.1367	0.1149	0.1437			518.4	0.0796	0.0602	0.0404	0.1118
																														518.8	0.0965	0.1181	0.0949	0.1398	0.1203	0.134	0.1586	0.1146	0.172	0.1364	0.114	0.1436			518.8	0.0791	0.0603	0.04	0.1118
																														519.2	0.0954	0.1173	0.095	0.1399	0.1206	0.1335	0.1587	0.1145	0.1713	0.1374	0.114	0.1422			519.2	0.0794	0.0611	0.0411	0.1121
																														519.6	0.0957	0.117	0.0947	0.14	0.1204	0.1332	0.1588	0.1146	0.1715	0.1373	0.114	0.1429			519.6	0.0792	0.0606	0.0402	0.1121
																														520	0.0956	0.1175	0.0942	0.1388	0.1189	0.1337	0.1576	0.1143	0.1722	0.1371	0.1153	0.1419			520	0.0786	0.0605	0.0405	0.1117
																														520.4	0.0958	0.1172	0.0944	0.1397	0.1198	0.1327	0.1585	0.1152	0.1727	0.1369	0.1141	0.1418			520.4	0.0794	0.0601	0.0399	0.1127
																														520.8	0.0959	0.1179	0.0953	0.1399	0.1204	0.1337	0.1587	0.1145	0.1715	0.1371	0.1146	0.143			520.8	0.079	0.0607	0.0406	0.1115
																														521.2	0.0956	0.118	0.0949	0.1398	0.1201	0.1328	0.1586	0.1142	0.172	0.1373	0.1144	0.1433			521.2	0.0794	0.0608	0.0404	0.1126
																														521.6	0.0962	0.1187	0.0952	0.1395	0.1209	0.1335	0.1583	0.1153	0.1719	0.1367	0.1151	0.1424			521.6	0.0788	0.0611	0.0405	0.1122
																														522	0.0957	0.1182	0.0944	0.1402	0.1202	0.1335	0.159	0.1146	0.1719	0.1378	0.1151	0.1426			522	0.0797	0.0607	0.0402	0.1114
																														522.4	0.0965	0.1174	0.0952	0.1393	0.1211	0.1333	0.1581	0.1153	0.1726	0.1373	0.1152	0.1422			522.4	0.0792	0.0616	0.0403	0.1127
																														522.8	0.0961	0.1178	0.0948	0.1389	0.1197	0.1333	0.1577	0.1154	0.1716	0.1376	0.1137	0.1422			522.8	0.0796	0.0607	0.0405	0.1123
																														523.2	0.0964	0.1174	0.096	0.1396	0.1202	0.1331	0.1584	0.115	0.1721	0.1379	0.1144	0.1433			523.2	0.0791	0.0613	0.0401	0.112
																														523.6	0.0961	0.1177	0.0954	0.1393	0.1206	0.1329	0.1581	0.1149	0.1715	0.1367	0.1142	0.1428			523.6	0.079	0.0612	0.0405	0.1129
																														524	0.0955	0.1182	0.0953	0.1392	0.1214	0.1325	0.158	0.1152	0.1729	0.1379	0.1141	0.143			524	0.0793	0.0613	0.0407	0.1126
																														524.4	0.0956	0.1187	0.0947	0.1397	0.1215	0.1332	0.1585	0.1143	0.172	0.1372	0.1149	0.1424			524.4	0.0811	0.0611	0.0412	0.1127
																														524.8	0.0951	0.1178	0.0957	0.1386	0.1201	0.1335	0.1574	0.1144	0.1714	0.1373	0.1149	0.1425			524.8	0.0795	0.0611	0.0408	0.1119
																														525.2	0.0958	0.1181	0.0954	0.1402	0.1204	0.1332	0.159	0.1144	0.1728	0.1376	0.1156	0.1422			525.2	0.0787	0.0613	0.0406	0.1118
																														525.6	0.0964	0.1176	0.0946	0.1399	0.1203	0.1332	0.1587	0.1149	0.171	0.1376	0.1142	0.1431			525.6	0.081	0.061	0.0405	0.1131
																														526	0.0968	0.1184	0.0949	0.1397	0.1202	0.1334	0.1585	0.1139	0.1725	0.1374	0.1141	0.1427			526	0.0788	0.0614	0.041	0.1121
																														526.4	0.0963	0.1184	0.0958	0.139	0.1203	0.1335	0.1578	0.115	0.1716	0.1371	0.1144	0.1431			526.4	0.0795	0.0609	0.0409	0.1127
																														526.8	0.0962	0.1181	0.0949	0.1402	0.1215	0.133	0.159	0.115	0.1725	0.137	0.1144	0.1421			526.8	0.0789	0.0612	0.0404	0.1119
																														527.2	0.0962	0.1181	0.0948	0.14	0.1209	0.1329	0.1588	0.115	0.1708	0.1372	0.1148	0.1437			527.2	0.0791	0.0608	0.0404	0.1125
																														527.6	0.0963	0.1179	0.0956	0.1404	0.1192	0.1337	0.1592	0.1152	0.1719	0.1373	0.115	0.1434			527.6	0.0792	0.0619	0.0402	0.1125
																														528	0.0961	0.1185	0.0952	0.1409	0.1205	0.1334	0.1597	0.1141	0.1718	0.1375	0.114	0.1423			528	0.0794	0.0609	0.0407	0.1126
																														528.4	0.0963	0.1178	0.0963	0.14	0.1202	0.1332	0.1588	0.1144	0.1719	0.1369	0.1147	0.1427			528.4	0.0799	0.0612	0.0404	0.1131
																														528.8	0.0964	0.1186	0.0949	0.1397	0.1199	0.1341	0.1585	0.114	0.1722	0.1368	0.1141	0.1434			528.8	0.0805	0.061	0.0411	0.1128
																														529.2	0.0962	0.1181	0.0958	0.1403	0.1202	0.1333	0.1591	0.1148	0.1716	0.1379	0.1145	0.1431			529.2	0.0794	0.0617	0.04	0.1131
																														529.6	0.0968	0.1184	0.0953	0.1392	0.12	0.1332	0.158	0.1146	0.1724	0.1369	0.1145	0.1437			529.6	0.0793	0.0614	0.0416	0.1119
																														530	0.0971	0.1178	0.0962	0.1391	0.1194	0.1335	0.1579	0.1147	0.1717	0.1371	0.115	0.1427			530	0.079	0.0619	0.0395	0.1127
																														530.4	0.0964	0.1185	0.0959	0.1394	0.1196	0.1335	0.1582	0.1142	0.1715	0.1376	0.1144	0.1426			530.4	0.0797	0.0611	0.0409	0.1121
																														530.8	0.0968	0.1181	0.0962	0.1405	0.1203	0.1338	0.1593	0.1155	0.1721	0.1374	0.1149	0.1421			530.8	0.0799	0.061	0.0411	0.1126
																														531.2	0.0972	0.1181	0.0956	0.1402	0.1198	0.1337	0.159	0.115	0.1712	0.1375	0.1139	0.1434			531.2	0.0789	0.0616	0.0413	0.1118
																														531.6	0.0963	0.1185	0.0956	0.1404	0.1206	0.1334	0.1592	0.1144	0.1717	0.1373	0.1148	0.1427			531.6	0.0794	0.0623	0.0409	0.1133
																														532	0.0964	0.1184	0.0951	0.1388	0.1204	0.1334	0.1576	0.1148	0.1712	0.1373	0.1146	0.1435			532	0.0805	0.0618	0.0414	0.111
																														532.4	0.097	0.1179	0.0955	0.1392	0.1201	0.1338	0.158	0.1144	0.1726	0.1379	0.1151	0.1426			532.4	0.08	0.0613	0.0413	0.1125
																														532.8	0.096	0.1178	0.0958	0.1391	0.1209	0.1333	0.1579	0.1142	0.1722	0.1368	0.114	0.1431			532.8	0.0792	0.0614	0.0403	0.1115
																														533.2	0.0955	0.1174	0.0965	0.1407	0.1202	0.1326	0.1595	0.1146	0.1719	0.1381	0.1145	0.142			533.2	0.0794	0.0608	0.0413	0.1124
																														533.6	0.0964	0.1184	0.0951	0.14	0.1201	0.134	0.1588	0.1139	0.1713	0.1373	0.1142	0.143			533.6	0.0803	0.0605	0.0409	0.112
																														534	0.0964	0.1181	0.0959	0.1403	0.1201	0.134	0.1591	0.1152	0.1719	0.1381	0.1155	0.1421			534	0.0791	0.0624	0.0415	0.1118
																														534.4	0.0966	0.1187	0.096	0.1387	0.1207	0.1334	0.1575	0.1139	0.1719	0.1375	0.1146	0.1435			534.4	0.0802	0.0609	0.04	0.1129
																														534.8	0.0964	0.118	0.0951	0.1405	0.12	0.1342	0.1593	0.1148	0.1719	0.1377	0.1139	0.1418			534.8	0.0806	0.0624	0.0407	0.1126
																														535.2	0.0968	0.1178	0.0962	0.1392	0.1211	0.1343	0.158	0.1144	0.172	0.1373	0.1142	0.1432			535.2	0.0809	0.0612	0.0408	0.1127
																														535.6	0.0966	0.1185	0.0953	0.1401	0.1211	0.1327	0.1589	0.1143	0.1717	0.1369	0.1149	0.1418			535.6	0.0795	0.0615	0.0406	0.113
																														536	0.0973	0.1193	0.0963	0.1395	0.121	0.1332	0.1583	0.1143	0.1714	0.1374	0.1155	0.1429			536	0.0804	0.0617	0.0407	0.113
																														536.4	0.0967	0.1182	0.096	0.1395	0.1207	0.1343	0.1583	0.1137	0.1713	0.1375	0.1143	0.1426			536.4	0.0809	0.0613	0.0418	0.1124
																														536.8	0.0956	0.1184	0.0966	0.1382	0.121	0.1331	0.157	0.1141	0.1714	0.1369	0.1155	0.1426			536.8	0.0796	0.0619	0.0416	0.1125
																														537.2	0.0969	0.1187	0.0966	0.1395	0.1196	0.1337	0.1583	0.1145	0.1722	0.1372	0.1144	0.1425			537.2	0.0799	0.0619	0.0417	0.1124
																														537.6	0.0964	0.1188	0.0966	0.1387	0.1194	0.1333	0.1575	0.1139	0.1716	0.1387	0.1146	0.1436			537.6	0.0812	0.0615	0.0417	0.1135
																														538	0.0979	0.1185	0.096	0.1405	0.1203	0.1333	0.1593	0.115	0.1729	0.1367	0.1141	0.1427			538	0.0803	0.0615	0.0413	0.1127
																														538.4	0.097	0.1187	0.0959	0.14	0.1194	0.1339	0.1588	0.1145	0.1717	0.1377	0.1146	0.1422			538.4	0.0813	0.0621	0.041	0.1134
																														538.8	0.0968	0.1186	0.0956	0.1398	0.121	0.1337	0.1586	0.1145	0.1718	0.1381	0.1143	0.1434			538.8	0.0805	0.0626	0.0413	0.1133
																														539.2	0.0967	0.118	0.0958	0.1393	0.1198	0.1335	0.1581	0.1148	0.1715	0.1371	0.1151	0.1432			539.2	0.0801	0.0619	0.0414	0.1127
																														539.6	0.0964	0.1192	0.0962	0.1398	0.1206	0.1338	0.1586	0.1139	0.1719	0.1385	0.1142	0.1429			539.6	0.0803	0.062	0.0416	0.1128
																														540	0.0972	0.1191	0.096	0.1398	0.1205	0.1332	0.1586	0.1143	0.1729	0.1375	0.1147	0.1428			540	0.0798	0.0621	0.0416	0.1122
																														540.4	0.0968	0.1185	0.0966	0.1402	0.1193	0.1326	0.159	0.1138	0.1712	0.138	0.1143	0.1426			540.4	0.0808	0.0618	0.0419	0.113
																														540.8	0.0968	0.1183	0.0967	0.1401	0.1212	0.1345	0.1589	0.1142	0.1718	0.1376	0.1144	0.1436			540.8	0.0801	0.0619	0.0416	0.1126
																														541.2	0.0973	0.1188	0.0966	0.1405	0.1216	0.1337	0.1593	0.1152	0.1724	0.1369	0.1144	0.1426			541.2	0.0802	0.0621	0.0413	0.113
																														541.6	0.097	0.1179	0.0962	0.1402	0.121	0.134	0.159	0.1145	0.1722	0.1365	0.1156	0.143			541.6	0.0801	0.0631	0.0416	0.1123
																														542	0.0962	0.1182	0.0969	0.1409	0.1208	0.134	0.1597	0.114	0.1716	0.1368	0.1156	0.1433			542	0.0809	0.0616	0.0421	0.1123
																														542.4	0.0977	0.1191	0.0971	0.1404	0.1207	0.134	0.1592	0.1144	0.172	0.1373	0.1151	0.1429			542.4	0.0797	0.0628	0.0405	0.1138
																														542.8	0.0973	0.1181	0.0967	0.1394	0.1202	0.1332	0.1582	0.1146	0.1722	0.1379	0.115	0.1429			542.8	0.0813	0.0614	0.0416	0.1122
																														543.2	0.0971	0.1192	0.0956	0.1397	0.1198	0.1341	0.1585	0.1145	0.1716	0.1365	0.114	0.1431			543.2	0.0796	0.062	0.0417	0.1123
																														543.6	0.097	0.1186	0.0959	0.1413	0.1215	0.1341	0.1601	0.1143	0.1718	0.137	0.114	0.1427			543.6	0.0812	0.0633	0.042	0.1126
																														544	0.0973	0.1197	0.097	0.1397	0.1209	0.135	0.1585	0.1142	0.1721	0.1363	0.1139	0.1424			544	0.0806	0.0628	0.0424	0.1132
																														544.4	0.0977	0.1184	0.0964	0.14	0.1209	0.1328	0.1588	0.1147	0.1715	0.1373	0.1148	0.1422			544.4	0.0802	0.0624	0.0413	0.1125
																														544.8	0.0966	0.1194	0.0971	0.1391	0.1203	0.1336	0.1579	0.1136	0.1723	0.1379	0.1143	0.1433			544.8	0.0816	0.0619	0.0415	0.113
																														545.2	0.0968	0.1185	0.0965	0.1398	0.1196	0.1331	0.1586	0.1145	0.1722	0.1371	0.1144	0.1437			545.2	0.0803	0.0616	0.0422	0.1129
																														545.6	0.0975	0.1192	0.097	0.14	0.1191	0.1329	0.1588	0.1138	0.1725	0.1379	0.1139	0.1435			545.6	0.081	0.0622	0.0409	0.1122
																														546	0.0973	0.1191	0.0971	0.1404	0.1207	0.1338	0.1592	0.1141	0.1717	0.1373	0.1139	0.1425			546	0.0805	0.0622	0.0413	0.1125
																														546.4	0.0972	0.1199	0.0966	0.1395	0.1207	0.1337	0.1583	0.1142	0.1712	0.1376	0.1152	0.142			546.4	0.0804	0.0636	0.0417	0.1137
																														546.8	0.0977	0.119	0.0972	0.1401	0.1206	0.1344	0.1589	0.114	0.1719	0.1357	0.1143	0.1423			546.8	0.0812	0.0623	0.0412	0.1129
																														547.2	0.0985	0.119	0.0963	0.1401	0.1197	0.134	0.1589	0.1141	0.1714	0.138	0.1146	0.1424			547.2	0.0824	0.0626	0.0413	0.1119
																														547.6	0.0971	0.1196	0.0978	0.1393	0.1199	0.1326	0.1581	0.1137	0.172	0.1373	0.1136	0.1429			547.6	0.0803	0.0623	0.0419	0.1126
																														548	0.0981	0.1196	0.0968	0.1399	0.1206	0.133	0.1587	0.1138	0.1714	0.1383	0.1139	0.1434			548	0.0808	0.062	0.0416	0.1123
																														548.4	0.0979	0.119	0.0978	0.1407	0.1201	0.1342	0.1595	0.1136	0.1727	0.1371	0.1143	0.1431			548.4	0.0806	0.0633	0.0411	0.1122
																														548.8	0.0973	0.1189	0.0976	0.1395	0.1205	0.1333	0.1583	0.1146	0.1719	0.1367	0.115	0.1425			548.8	0.0805	0.063	0.0415	0.1129
																														549.2	0.0975	0.1196	0.0964	0.14	0.12	0.1331	0.1588	0.1146	0.1712	0.1375	0.1148	0.143			549.2	0.0806	0.0627	0.0415	0.1133
																														549.6	0.0975	0.1197	0.0971	0.1396	0.1196	0.1344	0.1584	0.1146	0.1715	0.138	0.115	0.1422			549.6	0.0824	0.0623	0.042	0.1131
																														550	0.0977	0.1184	0.097	0.1395	0.1206	0.1343	0.1583	0.1137	0.173	0.1371	0.1141	0.143			550	0.0813	0.0617	0.0427	0.1132
																														550.4	0.0979	0.1195	0.0972	0.1393	0.12	0.1342	0.1581	0.1143	0.1716	0.1371	0.1134	0.1435			550.4	0.0808	0.0627	0.0413	0.1139
																														550.8	0.0974	0.1191	0.0969	0.1399	0.1212	0.1346	0.1587	0.1151	0.1725	0.1366	0.1134	0.1427			550.8	0.0818	0.0628	0.0409	0.1136
																														551.2	0.0976	0.1196	0.0973	0.1391	0.1194	0.1339	0.1579	0.1145	0.172	0.137	0.1156	0.142			551.2	0.0814	0.0637	0.0414	0.1129
																														551.6	0.0978	0.1192	0.0963	0.1396	0.1214	0.1343	0.1584	0.1143	0.171	0.1371	0.1135	0.1422			551.6	0.0812	0.062	0.0413	0.1131
																														552	0.0977	0.1192	0.0961	0.1387	0.1197	0.1337	0.1575	0.1146	0.1721	0.137	0.1145	0.1432			552	0.0813	0.0626	0.0422	0.1127
																														552.4	0.0971	0.1192	0.0967	0.1401	0.1209	0.1348	0.1589	0.1142	0.1719	0.138	0.1141	0.1429			552.4	0.0816	0.0622	0.0414	0.1124
																														552.8	0.0974	0.1199	0.0968	0.1402	0.1196	0.1342	0.159	0.1144	0.1705	0.1384	0.1149	0.1438			552.8	0.082	0.0628	0.0428	0.1127
																														553.2	0.0969	0.1195	0.0974	0.1406	0.1206	0.1346	0.1594	0.1136	0.172	0.138	0.1143	0.1431			553.2	0.0813	0.0628	0.0422	0.1134
																														553.6	0.0976	0.1189	0.0969	0.1398	0.12	0.1339	0.1586	0.1146	0.1719	0.1369	0.1153	0.1422			553.6	0.0816	0.0626	0.0419	0.1137
																														554	0.0973	0.1192	0.0979	0.1407	0.1206	0.135	0.1595	0.1147	0.1717	0.1367	0.115	0.1419			554	0.0823	0.0628	0.0423	0.1129
																														554.4	0.0978	0.1195	0.0969	0.1388	0.1204	0.1349	0.1576	0.1139	0.1716	0.1362	0.1154	0.1425			554.4	0.0826	0.0629	0.0425	0.1137
																														554.8	0.0971	0.1194	0.0979	0.1406	0.1195	0.1343	0.1594	0.1139	0.1721	0.138	0.1149	0.1427			554.8	0.0819	0.0628	0.0417	0.113
																														555.2	0.0979	0.119	0.0977	0.14	0.1207	0.1343	0.1588	0.1134	0.1717	0.1368	0.1141	0.142			555.2	0.0815	0.0633	0.0429	0.1116
																														555.6	0.0972	0.119	0.0979	0.1396	0.12	0.1345	0.1584	0.1149	0.1717	0.1371	0.1155	0.1427			555.6	0.0821	0.0626	0.0421	0.1124
																														556	0.0977	0.1195	0.0982	0.1398	0.1207	0.1343	0.1586	0.1142	0.1727	0.1371	0.115	0.1423			556	0.0817	0.0631	0.042	0.1127
																														556.4	0.0976	0.119	0.0973	0.1393	0.1214	0.1345	0.1581	0.1147	0.1718	0.1361	0.1153	0.1424			556.4	0.0822	0.0624	0.0422	0.1135
																														556.8	0.0981	0.1192	0.0975	0.1392	0.1203	0.1347	0.158	0.1144	0.1712	0.1384	0.1151	0.1428			556.8	0.0821	0.0632	0.0423	0.1125
																														557.2	0.0977	0.1192	0.097	0.1395	0.1202	0.1346	0.1583	0.1144	0.1712	0.1374	0.1145	0.1421			557.2	0.0828	0.0622	0.0422	0.1129
																														557.6	0.0966	0.1193	0.0976	0.1393	0.1208	0.1346	0.1581	0.1144	0.1712	0.1365	0.1139	0.1429			557.6	0.0817	0.0628	0.0418	0.1132
																														558	0.0977	0.1195	0.097	0.1405	0.1203	0.1344	0.1593	0.115	0.1719	0.1379	0.1143	0.1426			558	0.082	0.0631	0.0422	0.1139
																														558.4	0.0976	0.1198	0.0982	0.1398	0.1201	0.1338	0.1586	0.114	0.1715	0.1379	0.1145	0.1433			558.4	0.0825	0.0638	0.0419	0.1142
																														558.8	0.0987	0.1188	0.0977	0.1395	0.1208	0.134	0.1583	0.1133	0.1714	0.1375	0.1142	0.1416			558.8	0.082	0.0636	0.0422	0.1129
																														559.2	0.0981	0.1195	0.0978	0.1387	0.1197	0.1343	0.1575	0.1133	0.172	0.1387	0.1145	0.1417			559.2	0.0809	0.0628	0.0413	0.1128
																														559.6	0.0989	0.1174	0.0972	0.14	0.1206	0.1336	0.1588	0.1142	0.1716	0.1383	0.1146	0.1423			559.6	0.0814	0.0631	0.0416	0.1123
																														560	0.098	0.1196	0.098	0.1394	0.1208	0.1348	0.1582	0.1137	0.1717	0.1376	0.1146	0.1429			560	0.0822	0.0635	0.0417	0.1146
																														560.4	0.0976	0.1193	0.0988	0.1404	0.1195	0.1337	0.1592	0.1135	0.1716	0.1365	0.1144	0.1432			560.4	0.0813	0.0626	0.043	0.1134
																														560.8	0.0975	0.1196	0.0973	0.1395	0.1201	0.1335	0.1583	0.1146	0.1719	0.1368	0.1138	0.143			560.8	0.083	0.0639	0.0425	0.1146
																														561.2	0.0981	0.1196	0.0987	0.139	0.1201	0.1346	0.1578	0.1143	0.1716	0.1379	0.115	0.142			561.2	0.0829	0.0631	0.0419	0.1131
																														561.6	0.098	0.1201	0.0987	0.1401	0.1207	0.1345	0.1589	0.1138	0.1722	0.1373	0.1146	0.1425			561.6	0.0826	0.0626	0.0424	0.1132
																														562	0.0981	0.1198	0.0985	0.1398	0.1199	0.1341	0.1586	0.1133	0.1725	0.1381	0.1162	0.1417			562	0.0814	0.0617	0.0426	0.1127
																														562.4	0.098	0.1196	0.0987	0.1396	0.1211	0.1344	0.1584	0.114	0.1728	0.137	0.1159	0.1418			562.4	0.0823	0.0641	0.0419	0.1135
																														562.8	0.0975	0.1203	0.0983	0.1413	0.1203	0.1337	0.1601	0.1136	0.1714	0.1385	0.1148	0.1421			562.8	0.0825	0.0635	0.043	0.1138
																														563.2	0.0985	0.1204	0.0977	0.1393	0.1202	0.1331	0.1581	0.1145	0.1721	0.1364	0.1142	0.1429			563.2	0.0829	0.0637	0.0425	0.1137
																														563.6	0.0986	0.1196	0.0983	0.1393	0.1213	0.1339	0.1581	0.1133	0.1725	0.1379	0.1149	0.1419			563.6	0.0823	0.0632	0.0423	0.114
																														564	0.0986	0.1194	0.0981	0.1394	0.1211	0.1348	0.1582	0.113	0.1716	0.1361	0.1154	0.1427			564	0.0824	0.0635	0.0425	0.1134
																														564.4	0.0983	0.1199	0.0981	0.1397	0.1215	0.1346	0.1585	0.1126	0.1719	0.1373	0.115	0.143			564.4	0.0825	0.064	0.0426	0.1138
																														564.8	0.0983	0.1192	0.0983	0.1402	0.1201	0.1348	0.159	0.1134	0.1716	0.1375	0.1153	0.1429			564.8	0.083	0.0633	0.0417	0.1138
																														565.2	0.0982	0.1206	0.0983	0.1393	0.1207	0.1341	0.1581	0.1138	0.1717	0.1378	0.1146	0.1418			565.2	0.0822	0.0634	0.0428	0.1137
																														565.6	0.098	0.1194	0.0976	0.1401	0.1196	0.1346	0.1589	0.114	0.1708	0.1364	0.1141	0.1421			565.6	0.082	0.0634	0.0431	0.1123
																														566	0.0988	0.1201	0.0984	0.1393	0.1208	0.1341	0.1581	0.114	0.1718	0.1371	0.1149	0.1437			566	0.0821	0.0634	0.0427	0.1127
																														566.4	0.0978	0.1197	0.0986	0.1391	0.121	0.1342	0.1579	0.1133	0.1725	0.1368	0.115	0.1427			566.4	0.0839	0.0629	0.0422	0.1128
																														566.8	0.0976	0.1197	0.0982	0.1392	0.1201	0.1337	0.158	0.1143	0.1721	0.1375	0.1143	0.1421			566.8	0.0819	0.0635	0.0425	0.1139
																														567.2	0.0982	0.1196	0.0981	0.1395	0.1214	0.1344	0.1583	0.1142	0.1725	0.137	0.1148	0.1421			567.2	0.0828	0.0641	0.0424	0.1142
																														567.6	0.0983	0.1192	0.0992	0.1406	0.1206	0.1345	0.1594	0.1141	0.1719	0.1371	0.1145	0.1432			567.6	0.0827	0.0631	0.0425	0.1141
																														568	0.0985	0.1197	0.0977	0.1393	0.1202	0.135	0.1581	0.1146	0.1721	0.1369	0.1146	0.1425			568	0.0826	0.064	0.0424	0.1131
																														568.4	0.098	0.1193	0.0985	0.1396	0.1205	0.1344	0.1584	0.1136	0.1723	0.1373	0.1146	0.1437			568.4	0.0821	0.0639	0.043	0.1129
																														568.8	0.0991	0.1205	0.0983	0.1391	0.1209	0.135	0.1579	0.113	0.1715	0.1371	0.1145	0.1422			568.8	0.0829	0.064	0.042	0.1136
																														569.2	0.0982	0.1199	0.0989	0.1397	0.1212	0.1351	0.1585	0.1131	0.1725	0.1375	0.1144	0.143			569.2	0.083	0.0633	0.0428	0.1132
																														569.6	0.0986	0.1202	0.0987	0.1395	0.1197	0.1346	0.1583	0.1139	0.1713	0.138	0.1142	0.1418			569.6	0.082	0.0631	0.0424	0.1145
																														570	0.0985	0.1199	0.0987	0.1403	0.1211	0.1345	0.1591	0.1137	0.1718	0.1364	0.1143	0.1427			570	0.0826	0.0646	0.0422	0.1133
																														570.4	0.0988	0.1208	0.0995	0.1408	0.1198	0.1342	0.1596	0.1144	0.1721	0.1366	0.1133	0.143			570.4	0.0833	0.0638	0.0431	0.1131
																														570.8	0.0981	0.1193	0.0989	0.1405	0.1212	0.1346	0.1593	0.1131	0.1723	0.136	0.1151	0.1421			570.8	0.0837	0.0643	0.0428	0.1134
																														571.2	0.0983	0.1204	0.0986	0.1395	0.1208	0.1344	0.1583	0.1141	0.1712	0.1365	0.1145	0.1426			571.2	0.0828	0.0625	0.0421	0.1137
																														571.6	0.0989	0.1201	0.0984	0.1402	0.1209	0.1346	0.159	0.1135	0.1714	0.1374	0.1148	0.1436			571.6	0.0826	0.0638	0.0434	0.1137
																														572	0.098	0.1201	0.0975	0.1398	0.1197	0.1348	0.1586	0.114	0.1717	0.1382	0.1147	0.1423			572	0.0817	0.0638	0.043	0.1135
																														572.4	0.0985	0.1201	0.0996	0.1419	0.1207	0.1344	0.1607	0.1137	0.1712	0.1365	0.1145	0.1432			572.4	0.0822	0.0638	0.0426	0.1143
																														572.8	0.0984	0.1194	0.0995	0.1403	0.1191	0.1348	0.1591	0.114	0.1726	0.1369	0.1146	0.1426			572.8	0.0837	0.0643	0.0441	0.1139
																														573.2	0.0983	0.1195	0.0976	0.1403	0.1203	0.1347	0.1591	0.1139	0.1724	0.1358	0.114	0.1434			573.2	0.0832	0.0639	0.0427	0.1141
																														573.6	0.0992	0.1203	0.0986	0.1388	0.1199	0.1346	0.1576	0.1137	0.1713	0.1373	0.1141	0.1427			573.6	0.0824	0.0646	0.043	0.1142
																														574	0.099	0.1199	0.0997	0.1405	0.1199	0.135	0.1593	0.1137	0.172	0.137	0.1147	0.1434			574	0.0828	0.0638	0.0428	0.1148
																														574.4	0.0987	0.1195	0.0983	0.1406	0.1205	0.1346	0.1594	0.113	0.172	0.1377	0.1151	0.1423			574.4	0.0837	0.0644	0.042	0.1138
																														574.8	0.0985	0.1203	0.0996	0.1413	0.1198	0.134	0.1601	0.1145	0.1726	0.1356	0.114	0.1422			574.8	0.0839	0.0643	0.0426	0.1138
																														575.2	0.0992	0.1205	0.0991	0.1399	0.1199	0.1348	0.1587	0.114	0.1717	0.1369	0.115	0.1425			575.2	0.0837	0.0644	0.043	0.1134
																														575.6	0.0988	0.1201	0.099	0.1397	0.1213	0.1345	0.1585	0.1139	0.1709	0.1363	0.1142	0.1423			575.6	0.084	0.0646	0.0428	0.1137
																														576	0.0989	0.1212	0.0984	0.1397	0.1205	0.134	0.1585	0.1134	0.1712	0.1376	0.1147	0.1424			576	0.0824	0.0633	0.0433	0.1131
																														576.4	0.0986	0.1202	0.099	0.1395	0.1208	0.1348	0.1583	0.1143	0.1718	0.1382	0.1153	0.1425			576.4	0.0837	0.0649	0.0422	0.1137
																														576.8	0.0986	0.1201	0.0988	0.1395	0.1204	0.1349	0.1583	0.1139	0.1715	0.1372	0.1144	0.1422			576.8	0.0828	0.0646	0.0431	0.1143
																														577.2	0.0995	0.12	0.1003	0.1409	0.1196	0.1336	0.1597	0.1135	0.1716	0.1374	0.1144	0.1421			577.2	0.0839	0.065	0.0435	0.1129
																														577.6	0.0987	0.1206	0.0988	0.1395	0.1212	0.1343	0.1583	0.1139	0.1721	0.1362	0.1146	0.1429			577.6	0.083	0.0644	0.0428	0.1127
																														578	0.0995	0.1198	0.0996	0.1396	0.1201	0.1347	0.1584	0.1141	0.172	0.1369	0.1154	0.1428			578	0.0835	0.0643	0.0426	0.1145
																														578.4	0.0994	0.1217	0.0987	0.1398	0.1202	0.1348	0.1586	0.1137	0.1723	0.1362	0.1145	0.143			578.4	0.0832	0.0636	0.0432	0.1128
																														578.8	0.0988	0.1197	0.0994	0.1393	0.1206	0.1343	0.1581	0.1131	0.1721	0.138	0.1148	0.1441			578.8	0.0832	0.064	0.0439	0.1143
																														579.2	0.0983	0.1206	0.0995	0.1403	0.1199	0.1347	0.1591	0.1139	0.1712	0.1369	0.1144	0.1421			579.2	0.083	0.0648	0.0424	0.114
																														579.6	0.0987	0.12	0.0989	0.1399	0.1207	0.1356	0.1587	0.1141	0.1724	0.1374	0.1152	0.1427			579.6	0.084	0.0638	0.043	0.1136
																														580	0.0987	0.1211	0.1004	0.1401	0.1205	0.1354	0.1589	0.1141	0.172	0.1366	0.1153	0.1432			580	0.0835	0.064	0.0442	0.113
																														580.4	0.0987	0.1195	0.099	0.1397	0.1211	0.135	0.1585	0.1135	0.1719	0.1374	0.1149	0.1434			580.4	0.083	0.0641	0.0434	0.1133
																														580.8	0.0987	0.1206	0.0991	0.1399	0.1206	0.135	0.1587	0.1132	0.1716	0.1372	0.1152	0.1427			580.8	0.0844	0.0644	0.0425	0.1142
																														581.2	0.0984	0.1205	0.0985	0.1394	0.1204	0.1341	0.1582	0.1148	0.1716	0.1371	0.1137	0.1431			581.2	0.0833	0.0649	0.0431	0.1139
																														581.6	0.1	0.1211	0.0991	0.1397	0.1202	0.1343	0.1585	0.114	0.1721	0.1376	0.115	0.1432			581.6	0.0841	0.0649	0.0436	0.1137
																														582	0.098	0.1206	0.0997	0.1405	0.1207	0.1344	0.1593	0.1138	0.1721	0.1372	0.1145	0.1421			582	0.0845	0.0652	0.043	0.1127
																														582.4	0.0995	0.121	0.0997	0.1402	0.1205	0.136	0.159	0.114	0.1716	0.136	0.1143	0.1421			582.4	0.0845	0.0644	0.0435	0.1145
																														582.8	0.0991	0.1194	0.0993	0.1404	0.1203	0.1352	0.1592	0.1138	0.1705	0.1383	0.115	0.1432			582.8	0.0832	0.0643	0.0435	0.1141
																														583.2	0.0997	0.1206	0.0994	0.1396	0.1207	0.1353	0.1584	0.114	0.171	0.1365	0.1143	0.1417			583.2	0.0839	0.064	0.0431	0.1145
																														583.6	0.0982	0.1205	0.0998	0.139	0.1201	0.1361	0.1578	0.1136	0.1718	0.1368	0.115	0.143			583.6	0.0845	0.065	0.0424	0.1139
																														584	0.0993	0.1211	0.0991	0.14	0.1211	0.1349	0.1588	0.1135	0.1722	0.1368	0.1145	0.1438			584	0.0846	0.0651	0.0433	0.1135
																														584.4	0.0989	0.1205	0.1	0.1396	0.1201	0.1352	0.1584	0.1138	0.1706	0.1369	0.1143	0.1426			584.4	0.0832	0.0647	0.0426	0.113
																														584.8	0.0979	0.1214	0.0987	0.1396	0.1209	0.1354	0.1584	0.1139	0.1712	0.1368	0.1141	0.1421			584.8	0.0839	0.0649	0.0437	0.1133
																														585.2	0.0995	0.1211	0.0994	0.1408	0.1215	0.135	0.1596	0.1134	0.1716	0.1364	0.1141	0.1428			585.2	0.0841	0.0649	0.0438	0.1134
																														585.6	0.0985	0.12	0.0996	0.1395	0.1205	0.1346	0.1583	0.1125	0.1711	0.1366	0.115	0.1434			585.6	0.0836	0.0649	0.0435	0.1135
																														586	0.1	0.1202	0.0995	0.1395	0.1204	0.1355	0.1583	0.1135	0.1721	0.1368	0.116	0.1431			586	0.0841	0.0642	0.0437	0.1133
																														586.4	0.099	0.1214	0.0994	0.1385	0.1203	0.1343	0.1573	0.114	0.1717	0.1369	0.1144	0.1423			586.4	0.0828	0.065	0.0433	0.1142
																														586.8	0.0994	0.121	0.0997	0.1404	0.1207	0.1354	0.1592	0.1128	0.1708	0.1376	0.1142	0.1431			586.8	0.0835	0.0643	0.0429	0.1137
																														587.2	0.0986	0.1206	0.0998	0.1409	0.1203	0.1351	0.1597	0.1131	0.1714	0.1364	0.1144	0.1412			587.2	0.0838	0.0646	0.0435	0.1138
																														587.6	0.0992	0.1199	0.1002	0.1408	0.1214	0.1355	0.1596	0.1126	0.1718	0.1367	0.1146	0.1415			587.6	0.084	0.0646	0.0433	0.1134
																														588	0.0994	0.1205	0.1	0.1408	0.1207	0.1352	0.1596	0.1141	0.1712	0.1366	0.1148	0.1422			588	0.085	0.0646	0.0436	0.1141
																														588.4	0.0998	0.1204	0.1001	0.1395	0.1209	0.1348	0.1583	0.1134	0.1716	0.1367	0.1149	0.1435			588.4	0.0841	0.0654	0.0433	0.1137
																														588.8	0.1006	0.1203	0.1004	0.1391	0.1201	0.1347	0.1579	0.1139	0.1719	0.1375	0.1143	0.1426			588.8	0.0841	0.0652	0.0433	0.1136
																														589.2	0.0991	0.1211	0.0993	0.1404	0.1198	0.1353	0.1592	0.1141	0.1721	0.1362	0.1145	0.1427			589.2	0.0846	0.0646	0.0432	0.1131
																														589.6	0.0995	0.1205	0.1002	0.1393	0.12	0.1349	0.1581	0.1135	0.1721	0.1371	0.1149	0.1422			589.6	0.0847	0.0652	0.0436	0.1141
																														590	0.0996	0.1206	0.1003	0.1395	0.1199	0.1358	0.1583	0.1134	0.1714	0.1359	0.1153	0.1426			590	0.0836	0.0642	0.0434	0.1143
																														590.4	0.0991	0.12	0.1001	0.14	0.1205	0.1352	0.1588	0.1127	0.1719	0.1365	0.1148	0.1421			590.4	0.0843	0.0654	0.0442	0.1143
																														590.8	0.0991	0.1208	0.1007	0.1395	0.1212	0.1353	0.1583	0.1139	0.1729	0.1364	0.1146	0.1434			590.8	0.0839	0.0649	0.0431	0.1132
																														591.2	0.0997	0.1197	0.1002	0.1394	0.1206	0.1349	0.1582	0.1136	0.1718	0.1373	0.1148	0.143			591.2	0.0842	0.0653	0.0435	0.114
																														591.6	0.0994	0.1204	0.0994	0.1402	0.1202	0.1354	0.159	0.1143	0.1714	0.1374	0.1136	0.1419			591.6	0.0853	0.0645	0.0436	0.1136
																														592	0.0995	0.1206	0.1002	0.141	0.1203	0.1355	0.1598	0.1134	0.1722	0.1368	0.1144	0.1428			592	0.0845	0.0646	0.0434	0.1141
																														592.4	0.0994	0.1206	0.0998	0.1393	0.1206	0.1356	0.1581	0.1134	0.1713	0.1364	0.1141	0.142			592.4	0.0834	0.0651	0.0435	0.1139
																														592.8	0.1006	0.1207	0.1006	0.1406	0.121	0.134	0.1594	0.113	0.1726	0.137	0.1153	0.1428			592.8	0.0845	0.0658	0.0445	0.1143
																														593.2	0.1	0.1202	0.0998	0.1397	0.1209	0.1344	0.1585	0.1134	0.1716	0.136	0.1141	0.1434			593.2	0.0844	0.0655	0.0433	0.1137
																														593.6	0.0999	0.1201	0.1011	0.1397	0.1207	0.1339	0.1585	0.1138	0.1714	0.1369	0.1148	0.1428			593.6	0.0852	0.0654	0.0437	0.1139
																														594	0.0995	0.1211	0.0999	0.1392	0.1209	0.1347	0.158	0.1133	0.1712	0.1355	0.1141	0.1433			594	0.0846	0.0651	0.044	0.1145
																														594.4	0.0998	0.1205	0.0995	0.1398	0.1213	0.1346	0.1586	0.1135	0.1714	0.1378	0.1146	0.1429			594.4	0.0839	0.0651	0.0439	0.1149
																														594.8	0.1	0.1211	0.1011	0.1402	0.1202	0.1345	0.159	0.1123	0.1714	0.1361	0.1149	0.1429			594.8	0.0849	0.0639	0.0443	0.1147
																														595.2	0.0998	0.1209	0.1008	0.1399	0.1204	0.135	0.1587	0.1131	0.1726	0.1357	0.1148	0.1423			595.2	0.086	0.0655	0.0441	0.1145
																														595.6	0.0995	0.1205	0.1003	0.1392	0.1202	0.1353	0.158	0.1138	0.1723	0.1354	0.1155	0.1421			595.6	0.0848	0.0652	0.0438	0.1134
																														596	0.0999	0.1212	0.1002	0.1403	0.1204	0.1359	0.1591	0.1137	0.1714	0.1378	0.1143	0.1429			596	0.0854	0.066	0.0434	0.1141
																														596.4	0.1	0.1207	0.1007	0.1395	0.121	0.1346	0.1583	0.114	0.1716	0.1363	0.1143	0.142			596.4	0.0844	0.0657	0.044	0.1147
																														596.8	0.1001	0.1213	0.1006	0.1401	0.1206	0.1357	0.1589	0.1138	0.1719	0.1368	0.1149	0.1427			596.8	0.0844	0.0654	0.0439	0.1146
																														597.2	0.1005	0.1208	0.1008	0.1392	0.1211	0.135	0.158	0.1134	0.1716	0.1364	0.115	0.1416			597.2	0.0848	0.0651	0.0437	0.1145
																														597.6	0.0991	0.1219	0.1004	0.141	0.1214	0.1346	0.1598	0.1127	0.1728	0.1367	0.1149	0.1426			597.6	0.0847	0.0646	0.0444	0.1137
																														598	0.1006	0.1212	0.1007	0.1402	0.1207	0.1348	0.159	0.1134	0.1714	0.136	0.1153	0.1432			598	0.0843	0.0657	0.0441	0.1145
																														598.4	0.0995	0.1214	0.1002	0.1405	0.1195	0.1347	0.1593	0.1146	0.172	0.1373	0.1144	0.1413			598.4	0.0851	0.0652	0.0434	0.1134
																														598.8	0.1001	0.1214	0.1011	0.1399	0.1202	0.1356	0.1587	0.1132	0.1719	0.1354	0.1141	0.1424			598.8	0.0853	0.0659	0.0431	0.1145
																														599.2	0.099	0.1209	0.1002	0.1399	0.1201	0.1356	0.1587	0.1134	0.1717	0.1369	0.1142	0.143			599.2	0.0841	0.0654	0.0447	0.1149
																														599.6	0.1004	0.1201	0.1002	0.1401	0.1209	0.1355	0.1589	0.1128	0.1722	0.1362	0.1151	0.1424			599.6	0.0844	0.0654	0.0442	0.1146
																														600	0.0992	0.1211	0.0999	0.1399	0.1201	0.135	0.1587	0.1134	0.1712	0.1358	0.1147	0.1424			600	0.0854	0.0661	0.0437	0.1136
[truncated: 21 more columns]
