# Supplementary material for: Autophagosome membrane expansion is mediated by the N-terminus and cis-membrane association of human ATG8s
Source: eLife journal article supplement (doi:10.7554/elife.89185), 2023-06-08
Supplement: fig4-figsupp1-data1 [file Source data for Fig.4-S1.xlsx]

## Sheet: Figure 4-figure supplement 1
Figure 4-Figure supplement 1A			Blank liposomes: 95% POPC/ 5% Ni-NTA																											Figure 4-figure supplement 1B			POPC-based liposomes: 95% POPC/ 5% Ni-NTA
			Rh liposomes: 93% POPC/ 5% Ni-NTA/ 2% Rh-PE
	GABARAP V4CNBD-his (n=3)															GABARAP V4CNBD-his Nmut (M1E/K2E/E7A) (n=3)															GABARAP WT-His6 + 1mM POPC-based liposomes (n=3)															GABARAP ΔN9-His6 + 1mM POPC-based liposomes (n=3)
Wavelength (nm)	+blank liposomes			+blank liposomes+100mM imidazole			+Rh liposomes			+Rh liposomes+100mM imidazole					Wavelength (nm)	+blank liposomes			+blank liposomes+100mM imidazole			+Rh liposomes			+Rh liposomes+100mM imidazole						1μM			2μM			5μM			10μM						1μM			2μM
	R1	R2	R3	R1	R2	R3	R1	R2	R3	R1	R2	R3				R1	R2	R3	R1	R2	R3	R1	R2	R3	R1	R2	R3			Time (sec)	R1	R2	R3	R1	R2	R3	R1	R2	R3	R1	R2	R3			Time (sec)	R1	R2	R3	R1
500	0.201676	0.165128	0.154316	0.0458273	0.0441905	0.0432353	0.261474	0.242852	0.216507	0.0194262	0.0449293	0.0366095			500	0.123909	0.14046	0.126133	0.0348317	0.0546844	0.0436177	0.188686	0.183695	0.183065	0.0170894	0.0448143	0.0444449			0	0	0	0	0	0	0	0	0	0	0	0	0			0	0	0	0	0
500.2	0.197916	0.162468	0.152017	0.0480331	0.0460472	0.045013	0.252722	0.234518	0.20988	0.0225245	0.0468393	0.038051			500.2	0.122237	0.137706	0.12431	0.0380546	0.0567206	0.0459164	0.181688	0.177576	0.176316	0.0210483	0.0469311	0.0464298			0.4	-0.0006	0.0002	-0.0001	0.0006	-0.0005	0.0008	-0.0006	0.0006	-0.0003	-0.0001	-0.0019	0.0002			0.4	-0.0005	0.0006	0.0004	-0.0008
500.4	0.191044	0.157592	0.148416	0.0518031	0.0494945	0.0485594	0.236798	0.219634	0.197353	0.0284012	0.0497862	0.0411321			500.4	0.119632	0.132761	0.121482	0.0438557	0.060173	0.0502375	0.169235	0.165578	0.164336	0.0282696	0.0505619	0.0503019			0.8	0.0004	-0.0005	0.0014	0.0006	-0.0002	-0.001	0.0003	0	-0.0019	-0.0005	-0.001	0.0003			0.8	0.0002	-0.0006	-0.0005	-0.0006
500.6	0.188048	0.155695	0.146918	0.0535225	0.0511894	0.0501954	0.229451	0.212836	0.191917	0.0310186	0.0511638	0.0426027			500.6	0.118399	0.130712	0.120243	0.0467999	0.0615958	0.052609	0.163502	0.160181	0.159134	0.0314238	0.0523414	0.0520124			1.2	-0.0007	0.0004	0	0.0007	0.0002	0.0011	0.0016	-0.0011	-0.0006	0.0003	-0.0015	0.0001			1.2	-0.0002	-0.0002	-0.0002	-0.0011
500.8	0.183364	0.152511	0.144516	0.0568135	0.0547729	0.0532147	0.217045	0.20062	0.182816	0.0362087	0.0542597	0.0457637			500.8	0.116699	0.12742	0.118378	0.0522538	0.0644347	0.0565226	0.154013	0.15068	0.150063	0.0376637	0.0557547	0.0557598			1.6	-0.0004	-0.0001	-0.0003	0.0013	-0.0001	-0.0001	0.0021	0.0005	-0.0018	-0.0001	-0.0015	0.0008			1.6	-0.0002	-0.0013	-0.0007	-0.0004
501	0.180597	0.150461	0.143292	0.0594123	0.0576376	0.0558968	0.20844	0.192103	0.177147	0.0403584	0.0564484	0.0481481			501	0.115549	0.125506	0.117159	0.0562605	0.0668656	0.0596849	0.147725	0.144445	0.143801	0.0429845	0.0583063	0.0585422			2	0.0004	-0.0001	-0.0005	0.0009	0.0002	0	0.0026	0.0004	-0.0011	0.0003	-0.0015	0.0004			2	-0.0008	-0.0005	-0.0006	-0.0009
501.2	0.178853	0.148937	0.142396	0.0615474	0.0598356	0.0580823	0.202173	0.185635	0.172891	0.0436603	0.0581886	0.0498711			501.2	0.114811	0.124175	0.116406	0.0594443	0.068735	0.0622503	0.143114	0.139934	0.139126	0.0472653	0.0603453	0.0606454			2.4	0.0012	-0.0006	0.0006	0.0006	-0.0005	-0.0004	0.0027	0.001	-0.0011	0.0008	-0.0013	0.0008			2.4	-0.0012	-0.0009	-0.0008	0.0001
501.4	0.17767	0.147883	0.14182	0.0644377	0.0624829	0.0605682	0.196013	0.179358	0.168614	0.0475646	0.0605968	0.0518641			501.4	0.114667	0.123116	0.115931	0.0633362	0.0712026	0.0650595	0.138493	0.135451	0.134439	0.0520513	0.062982	0.0634043			2.8	0.0011	0.0001	-0.0001	0.0016	-0.0005	0.0009	0.0044	0.0013	-0.0013	0.0012	-0.0007	0.0006			2.8	-0.0006	0.0001	-0.0008	-0.0007
501.6	0.176926	0.147224	0.141659	0.0666046	0.0647457	0.0625111	0.191652	0.174924	0.165416	0.0505619	0.0626122	0.0535128			501.6	0.114672	0.122438	0.115721	0.0663246	0.0733323	0.0673079	0.135222	0.132263	0.1311	0.0555174	0.065179	0.06563			3.2	-0.0001	0.0003	0.001	0.0007	-0.0001	0.0002	0.0055	0.0012	-0.0023	0.0008	-0.0003	0.0006			3.2	-0.0005	0.0002	-0.001	-0.0001
501.8	0.176658	0.147446	0.141981	0.0693503	0.0674513	0.0650561	0.187768	0.170946	0.162658	0.0539433	0.0650482	0.0560079			501.8	0.115357	0.122101	0.115932	0.0698065	0.0759331	0.0703121	0.132207	0.129387	0.128147	0.0596217	0.0678517	0.0684619			3.6	0.0005	0.0008	-0.0004	0.0023	-0.0004	-0.0005	0.0061	0.0005	-0.002	0.0013	-0.0008	0.0008			3.6	0.0002	-0.0002	-0.0015	-0.0009
502	0.176825	0.147895	0.142423	0.0713632	0.0695595	0.0671265	0.185053	0.168222	0.160842	0.0564126	0.0669799	0.0579234			502	0.116034	0.122101	0.116173	0.07238	0.0779275	0.0727655	0.1301	0.127408	0.126122	0.0627389	0.0698973	0.0706509			4	0.0005	-0.0006	-0.0001	0.0011	0.0005	0.0004	0.0053	0.001	-0.002	0.0026	-0.0007	0.0004			4	-0.0003	-0.0001	-0.0011	-0.0005
502.2	0.177795	0.148643	0.143597	0.0740578	0.0720443	0.0694772	0.183011	0.165978	0.159881	0.0595393	0.0694321	0.060222			502.2	0.117526	0.122667	0.116973	0.075603	0.0802085	0.0757197	0.128579	0.125942	0.124582	0.0665475	0.0724576	0.0733152			4.4	0.0011	0.0005	0.0004	0.0019	-0.0004	0.0004	0.0072	0.0007	-0.0014	0.0034	0.0002	0.0024			4.4	-0.0012	-0.0016	-0.001	-0.0005
502.4	0.178856	0.149521	0.144725	0.0762032	0.0739606	0.0714175	0.181836	0.16463	0.159385	0.0619577	0.0715444	0.0620684			502.4	0.118755	0.123409	0.117783	0.0780986	0.0819648	0.0780448	0.127745	0.125072	0.123702	0.0695661	0.0745132	0.0754898			4.8	0.002	-0.0005	0.0001	0.0029	0.0006	0.001	0.0077	0.0016	-0.0019	0.0037	0.0003	0.0009			4.8	-0.0004	-0.0008	-0.0009	-0.0003
502.6	0.180696	0.150901	0.146528	0.078631	0.0764961	0.0737866	0.181233	0.163821	0.159526	0.064967	0.0738361	0.0644232			502.6	0.120283	0.124653	0.119332	0.0811349	0.0844154	0.080854	0.127278	0.124853	0.123469	0.0730975	0.0770558	0.0780875			5.2	0.0014	-0.0006	-0.0008	0.0017	0.0012	0.0005	0.0088	0.0017	-0.0017	0.0044	0.0006	0.0014			5.2	-0.0004	-0.0002	-0.0007	-0.0002
502.8	0.182376	0.152242	0.148115	0.0806398	0.0784189	0.0757601	0.181177	0.163506	0.159827	0.0672424	0.0756866	0.0662486			502.8	0.121651	0.125789	0.120721	0.0835759	0.0863922	0.0831239	0.127279	0.124857	0.12345	0.0758166	0.0791177	0.080179			5.6	0.0015	0.0007	-0.0001	0.0026	0.0006	-0.0001	0.0088	0.0015	-0.0022	0.0053	0.0012	0.0023			5.6	-0.0006	0.0003	-0.0011	-0.0003
503	0.185031	0.154464	0.150557	0.0832803	0.0809865	0.0782414	0.181916	0.163895	0.160937	0.0700163	0.078131	0.0685187			503	0.123728	0.127656	0.12294	0.0864472	0.0891305	0.0858848	0.127916	0.125371	0.124081	0.0791469	0.0816804	0.0828741			6	0.0015	-0.0003	-0.0003	0.0021	0.0007	0.0001	0.0105	0.0016	-0.0017	0.0048	0.0009	0.0023			6	-0.0012	-0.0014	-0.0014	-0.0008
503.2	0.187255	0.156391	0.152697	0.0854312	0.0831665	0.0803243	0.182824	0.164457	0.161919	0.0722486	0.0800343	0.0702472			503.2	0.125522	0.129265	0.12478	0.0887614	0.0913716	0.088151	0.128636	0.125974	0.124804	0.0818192	0.0837508	0.0849764			6.4	-0.0001	0.0004	0.0004	0.0028	0.0008	0	0.0109	0.0022	-0.0017	0.006	0.0006	0.0032			6.4	-0.0011	-0.0024	-0.0014	-0.0002
503.4	0.190541	0.159046	0.155608	0.0879738	0.0856062	0.0829152	0.184547	0.16586	0.163719	0.0750496	0.0825228	0.0724794			503.4	0.128025	0.131532	0.127288	0.0917926	0.0939106	0.0910017	0.130026	0.127337	0.126271	0.0851292	0.0862804	0.0876328			6.8	0.0017	-0.0001	-0.0004	0.0029	0.0006	-0.0009	0.0117	0.0015	-0.0013	0.0069	0.001	0.0025			6.8	-0.0014	-0.0021	-0.0018	-0.0002
503.6	0.19323	0.161245	0.158037	0.0900401	0.0876547	0.0849565	0.186112	0.16711	0.165307	0.0772931	0.0844549	0.0742441			503.6	0.130147	0.133405	0.12942	0.0942028	0.0959444	0.0932572	0.131294	0.128638	0.127597	0.0877449	0.0883229	0.0897526			7.2	0.0018	-0.0003	0.0006	0.0036	0.0013	0.0003	0.0115	0.0015	-0.0016	0.0071	0.0012	0.0026			7.2	-0.0003	-0.0011	-0.002	-0.0002
503.8	0.196803	0.164279	0.161182	0.0926274	0.0903297	0.0876062	0.188792	0.169239	0.167876	0.0800361	0.087079	0.0765725			503.8	0.13284	0.136288	0.132248	0.0972244	0.0986072	0.0960884	0.133305	0.130654	0.129616	0.0910039	0.0910112	0.0924749			7.6	0.0023	-0.0001	-0.0005	0.0034	0.0017	0.001	0.0135	0.0022	-0.0013	0.0081	0.0017	0.0034			7.6	-0.0009	-0.0013	-0.0017	-0.0003
504	0.199757	0.166865	0.163796	0.0948524	0.0924574	0.0896965	0.19103	0.171042	0.170144	0.0822528	0.089195	0.078454			504	0.13514	0.138659	0.134593	0.0996536	0.100826	0.0983631	0.135059	0.132449	0.131459	0.0935782	0.0931762	0.0946878			8	0.0019	0	0.0002	0.0042	0.001	0.0005	0.0135	0.0032	-0.001	0.0095	0.004	0.0041			8	-0.0009	-0.0021	-0.0015	-0.0001
504.2	0.203904	0.17038	0.167378	0.0975209	0.0951069	0.0923757	0.194203	0.173827	0.173181	0.0849151	0.0918774	0.0808278			504.2	0.138253	0.141714	0.137774	0.102649	0.103579	0.101303	0.137578	0.134954	0.134037	0.0967549	0.0957689	0.0974068			8.4	0.0016	0.0001	-0.0014	0.004	0.002	0.0005	0.0145	0.0028	-0.0018	0.01	0.0036	0.0037			8.4	-0.0011	-0.0013	-0.0018	0.0001
504.4	0.207255	0.17322	0.170347	0.0997709	0.09732	0.0945911	0.19696	0.176111	0.1757	0.08704	0.0940948	0.0827263			504.4	0.140743	0.144305	0.140487	0.10513	0.105809	0.103724	0.139676	0.137081	0.136167	0.0992856	0.0979128	0.0996538			8.8	0.0024	0.0004	0.0001	0.0041	0.0012	0	0.0162	0.0031	-0.0015	0.0111	0.0034	0.0047			8.8	-0.0004	-0.0019	-0.0014	-0.0006
504.6	0.211716	0.176843	0.174234	0.102698	0.100111	0.0973101	0.200723	0.17938	0.179198	0.0898051	0.0968028	0.0851824			504.6	0.144078	0.147702	0.143823	0.108242	0.10876	0.106679	0.142659	0.140049	0.13895	0.102432	0.100842	0.102494			9.2	0.002	0.0003	-0.0014	0.0048	0.002	0.0007	0.0156	0.0024	-0.0017	0.0114	0.0039	0.0055			9.2	-0.0005	-0.0021	-0.0023	-0.0003
504.8	0.215324	0.179824	0.177353	0.105073	0.102355	0.0995178	0.203703	0.182172	0.182072	0.0920718	0.0991339	0.087168			504.8	0.146879	0.150394	0.146553	0.110704	0.111151	0.109124	0.145109	0.142545	0.141277	0.105003	0.103178	0.104763			9.6	0.002	0.0006	-0.0006	0.0039	0.0012	0.0006	0.0164	0.003	-0.0012	0.0123	0.004	0.0051			9.6	-0.001	-0.0021	-0.0012	-0.0002
505	0.220136	0.183958	0.181428	0.107994	0.105234	0.102368	0.207897	0.185755	0.185931	0.0949399	0.102065	0.0897306			505	0.150566	0.154032	0.150224	0.113799	0.114194	0.112254	0.148267	0.145717	0.144549	0.108267	0.106194	0.107633			10	0.0027	0.0005	-0.0004	0.0049	0.0017	0.0001	0.0176	0.0031	-0.0016	0.0136	0.0048	0.0052			10	-0.0014	-0.0024	-0.0016	0.0006
505.2	0.22405	0.187239	0.184744	0.110333	0.10755	0.104682	0.211208	0.188739	0.189061	0.0972719	0.104417	0.0917876			505.2	0.153499	0.156996	0.153145	0.116261	0.116601	0.114645	0.150842	0.148384	0.14723	0.110897	0.108573	0.109974			10.4	0.0029	0.001	-0.0003	0.0059	0.0021	-0.0002	0.0185	0.0033	-0.0005	0.0138	0.0053	0.0055			10.4	-0.0009	-0.0016	-0.002	-0.0005
505.4	0.229124	0.191555	0.189009	0.113334	0.110495	0.107595	0.215695	0.192731	0.193193	0.100159	0.107343	0.0944163			505.4	0.15735	0.160755	0.157087	0.119481	0.119679	0.117745	0.154401	0.151991	0.150589	0.1142	0.111559	0.112991			10.8	0.0032	-0.0001	-0.0002	0.0053	0.0023	0.0004	0.0191	0.0039	-0.001	0.0149	0.0053	0.0058			10.8	-0.001	-0.0021	-0.0022	0.0001
505.6	0.23323	0.194981	0.192452	0.115793	0.112927	0.10992	0.219387	0.19591	0.196542	0.102446	0.109703	0.0965399			505.6	0.160397	0.163873	0.160287	0.122081	0.122161	0.120265	0.157318	0.154848	0.153359	0.116829	0.113965	0.115477			11.2	0.0029	0.0013	0	0.0057	0.0028	0.0004	0.0206	0.004	-0.0002	0.0169	0.0061	0.0074			11.2	-0.0005	-0.0016	-0.0015	0.0008
505.8	0.238422	0.199377	0.196854	0.118945	0.115971	0.113035	0.224118	0.200115	0.200883	0.105426	0.112704	0.0992953			505.8	0.164349	0.167917	0.164313	0.125406	0.125433	0.12353	0.161164	0.158538	0.157127	0.120158	0.117061	0.118666			11.6	0.0024	0.001	-0.0011	0.0062	0.0022	0.0012	0.0203	0.0044	-0.0015	0.0174	0.0067	0.007			11.6	-0.0007	-0.0019	-0.0022	0.0004
506	0.242593	0.202935	0.200394	0.121516	0.118445	0.115496	0.228153	0.203572	0.204424	0.10783	0.115118	0.101474			506	0.167513	0.171237	0.167588	0.128061	0.128118	0.12618	0.164301	0.161584	0.160251	0.12292	0.119614	0.121268			12	0.0037	0.0012	-0.0004	0.0049	0.0026	0.0006	0.0225	0.0036	-0.0009	0.0181	0.0078	0.0076			12	-0.0006	-0.0025	-0.0024	0.0009
506.2	0.248101	0.207605	0.204891	0.124753	0.12169	0.118788	0.233195	0.207952	0.20897	0.110903	0.118348	0.104208			506.2	0.171784	0.17544	0.17178	0.131446	0.131483	0.129552	0.168237	0.165519	0.164121	0.126416	0.122815	0.124526			12.4	0.0024	0.001	-0.0004	0.0069	0.0033	0.0009	0.0228	0.0044	-0.0002	0.02	0.0069	0.008			12.4	-0.0005	-0.0008	-0.0026	0.0005
506.4	0.252517	0.211306	0.208567	0.127396	0.12431	0.121366	0.237272	0.211502	0.212687	0.113417	0.120847	0.106411			506.4	0.175277	0.178874	0.175188	0.134162	0.134277	0.132237	0.171424	0.168787	0.167319	0.129345	0.125439	0.127085			12.8	0.0034	0.002	0.0001	0.0067	0.0034	0.0004	0.0244	0.0048	-0.0003	0.0208	0.0082	0.0078			12.8	-0.0002	-0.0022	-0.0025	0.0007
506.6	0.258131	0.216121	0.213226	0.130805	0.12761	0.124552	0.242478	0.216071	0.217483	0.116534	0.124093	0.109339			506.6	0.179554	0.18331	0.179526	0.137872	0.137745	0.135783	0.175631	0.172947	0.171403	0.132854	0.128643	0.130432			13.2	0.0036	0.0002	-0.0004	0.0076	0.0034	0.0004	0.024	0.0058	0.0002	0.0215	0.0082	0.009			13.2	-0.0007	-0.0014	-0.0023	0.0003
506.8	0.26269	0.21998	0.216998	0.133586	0.130298	0.127287	0.246776	0.21983	0.221369	0.11905	0.126638	0.111721			506.8	0.183024	0.186809	0.183071	0.140758	0.140556	0.138654	0.179072	0.176396	0.174721	0.135664	0.131307	0.133094			13.6	0.0024	0.001	-0.0001	0.0073	0.0038	0.0008	0.0259	0.0054	-0.0006	0.0226	0.0099	0.01			13.6	-0.0009	-0.0013	-0.0019	0.0011
507	0.26841	0.224948	0.221955	0.137031	0.133647	0.130784	0.252282	0.224655	0.226335	0.122275	0.130045	0.114798			507	0.18759	0.191378	0.187572	0.144348	0.144191	0.142313	0.183483	0.180701	0.179016	0.139362	0.134763	0.13661			14	0.0043	0.0009	0.0003	0.007	0.0037	0.0001	0.0264	0.0069	0	0.024	0.0092	0.0101			14	-0.0003	-0.0019	-0.0025	0.0011
507.2	0.273095	0.229019	0.225837	0.139781	0.136351	0.133557	0.256713	0.228532	0.230379	0.124913	0.132768	0.117342			507.2	0.191269	0.195137	0.191185	0.147297	0.147155	0.145269	0.187199	0.184229	0.182577	0.142241	0.137567	0.139473			14.4	0.0034	0.0022	0	0.0077	0.0041	0.0004	0.0273	0.0061	0.0005	0.0245	0.0106	0.0108			14.4	-0.0005	-0.002	-0.0015	0.0008
507.4	0.279221	0.234071	0.230881	0.143301	0.139924	0.137112	0.262608	0.233521	0.235482	0.128304	0.136217	0.120497			507.4	0.195809	0.199886	0.195896	0.151049	0.150891	0.149051	0.19188	0.188745	0.187015	0.146061	0.141074	0.143141			14.8	0.0039	0.0019	-0.0005	0.0081	0.0036	0.0007	0.0277	0.0063	0.0011	0.0266	0.0099	0.0107			14.8	-0.0004	-0.0025	-0.0025	0.0011
507.6	0.284197	0.238105	0.235014	0.146171	0.142759	0.13995	0.267305	0.237595	0.2396	0.131028	0.139007	0.123007			507.6	0.199468	0.203737	0.199747	0.154015	0.153911	0.152076	0.195676	0.19238	0.190714	0.149096	0.143986	0.146122			15.2	0.0042	0.0013	-0.001	0.0085	0.0047	0.0004	0.0296	0.0061	0.0005	0.027	0.0111	0.0117			15.2	-0.0007	-0.0025	-0.0023	0.0014
507.8	0.289261	0.242333	0.239195	0.149043	0.145652	0.142851	0.271982	0.241733	0.243769	0.133774	0.14185	0.125571			507.8	0.203324	0.207669	0.203567	0.157046	0.157013	0.155088	0.199599	0.196127	0.194402	0.152148	0.146921	0.149129			15.6	0.0041	0.0015	-0.0006	0.0082	0.0037	0.0013	0.0299	0.0069	0.0007	0.0289	0.012	0.0114			15.6	-0.0004	-0.0017	-0.0031	0.0015
508	0.295542	0.2477	0.244463	0.152711	0.149348	0.146486	0.277858	0.24699	0.249137	0.137246	0.145571	0.128822			508	0.208165	0.212552	0.20848	0.160855	0.160933	0.15896	0.204451	0.200858	0.199207	0.156027	0.150586	0.152918			16	0.0039	0.0009	-0.0008	0.0087	0.0046	0.0009	0.03	0.0075	0.0007	0.0294	0.0135	0.0129			16	-0.0004	-0.0016	-0.0025	0.0008
508.2	0.300554	0.25205	0.24875	0.155773	0.152312	0.149563	0.282684	0.251163	0.2534	0.140039	0.148469	0.131507			508.2	0.212132	0.21659	0.212468	0.164064	0.16409	0.162115	0.208467	0.204622	0.20306	0.15919	0.153489	0.156011			16.4	0.0043	0.002	-0.0001	0.0089	0.0052	0.0012	0.032	0.0068	0.0014	0.0315	0.0134	0.0124			16.4	-0.0002	-0.0019	-0.0023	0.0023
508.4	0.306901	0.257511	0.254147	0.159619	0.155993	0.153389	0.288771	0.256496	0.25878	0.143578	0.152063	0.134919			508.4	0.217018	0.2217	0.217494	0.168133	0.167981	0.166005	0.2135	0.20952	0.207907	0.1632	0.157165	0.159963			16.8	0.0046	0.0015	-0.0001	0.009	0.0051	0.0011	0.032	0.0085	0.0012	0.0313	0.0137	0.0143			16.8	0.0003	-0.0016	-0.0024	0.0018
508.6	0.314534	0.264116	0.260788	0.164288	0.160661	0.158031	0.296307	0.263098	0.265279	0.147808	0.156625	0.139061			508.6	0.223023	0.228007	0.223582	0.173098	0.172863	0.170977	0.219768	0.215435	0.213763	0.168074	0.161856	0.164787			17.2	0.0051	0.0015	-0.0003	0.0092	0.0048	0.0007	0.0331	0.0088	0.0019	0.0348	0.0135	0.0147			17.2	-0.0006	-0.0015	-0.0021	0.0021
508.8	0.318391	0.267314	0.264006	0.166677	0.162954	0.160391	0.299968	0.266232	0.268668	0.150033	0.158928	0.141173			508.8	0.22613	0.231182	0.226626	0.175642	0.175301	0.173497	0.222827	0.21838	0.21683	0.170577	0.164224	0.1672			17.6	0.0044	0.002	-0.0007	0.0099	0.0051	0.0007	0.0349	0.0079	0.0019	0.0355	0.0144	0.0144			17.6	-0.0003	-0.0019	-0.0027	0.0025
509	0.326431	0.274162	0.270694	0.171517	0.167567	0.165271	0.307625	0.273038	0.2754	0.154608	0.163677	0.145392			509	0.232358	0.237583	0.232907	0.180772	0.180294	0.178635	0.22901	0.224459	0.223047	0.175695	0.168845	0.172027			18	0.0051	0.0018	-0.0004	0.0102	0.0064	0.001	0.0351	0.0082	0.0019	0.036	0.0153	0.016			18	0.001	-0.0024	-0.0019	0.0018
509.2	0.330512	0.277575	0.27403	0.173909	0.169963	0.167689	0.311557	0.276489	0.278813	0.15684	0.166034	0.14752			509.2	0.235488	0.240811	0.236067	0.183409	0.182897	0.181245	0.232063	0.227627	0.22622	0.178317	0.171265	0.174482			18.4	0.0046	0.0019	-0.0005	0.0109	0.0055	0.001	0.0363	0.0093	0.0017	0.0384	0.0159	0.016			18.4	0.0004	-0.0015	-0.0021	0.0023
509.4	0.338571	0.284487	0.28095	0.178841	0.174725	0.172558	0.31913	0.283335	0.28565	0.161491	0.170754	0.151709			509.4	0.241806	0.247247	0.242339	0.188682	0.187898	0.186308	0.238317	0.233878	0.232329	0.183547	0.176028	0.179464			18.8	0.005	0.001	0	0.011	0.0063	0.0021	0.0364	0.0099	0.0018	0.0391	0.0169	0.0167			18.8	0.0007	-0.0013	-0.0022	0.0025
509.6	0.342688	0.287894	0.284505	0.181381	0.177131	0.174971	0.323002	0.286792	0.289073	0.163861	0.173103	0.153943			509.6	0.244994	0.250568	0.245571	0.191341	0.190484	0.188925	0.241506	0.237053	0.235559	0.18629	0.178581	0.181955			19.2	0.0054	0.0017	-0.0001	0.0108	0.0066	0.0006	0.0373	0.0095	0.0026	0.041	0.0175	0.0175			19.2	0.0005	-0.0017	-0.0025	0.0032
509.8	0.350999	0.294887	0.291494	0.186535	0.182123	0.18004	0.330838	0.293919	0.296052	0.168603	0.178138	0.158496			509.8	0.251273	0.257335	0.252051	0.196775	0.195731	0.194267	0.248105	0.243515	0.241968	0.191464	0.183542	0.187196			19.6	0.0052	0.0021	-0.0008	0.0111	0.0068	0.0014	0.0381	0.0107	0.0026	0.0418	0.0181	0.0184			19.6	-0.0005	-0.0023	-0.0023	0.0031
510	0.355189	0.29844	0.294876	0.188972	0.184642	0.182724	0.334779	0.297472	0.299581	0.171011	0.180649	0.16076			510	0.254582	0.260653	0.255356	0.199371	0.19846	0.196972	0.251372	0.246805	0.245192	0.194219	0.186086	0.189832			20	0.0056	0.0026	-0.0003	0.0113	0.0063	0.0015	0.0387	0.01	0.0033	0.0427	0.0185	0.0187			20	0.0007	-0.0026	-0.0022	0.0031
510.2	0.36361	0.305802	0.302131	0.19407	0.189728	0.187845	0.342704	0.304577	0.306752	0.1759	0.185768	0.165316			510.2	0.261272	0.267462	0.262029	0.204835	0.203856	0.20238	0.257918	0.253447	0.25177	0.199665	0.191365	0.195239			20.4	0.0056	0.0029	-0.0003	0.012	0.0076	0.0017	0.0397	0.0122	0.0039	0.0447	0.0197	0.0198			20.4	0.0006	-0.0017	-0.0027	0.0035
510.4	0.367825	0.309339	0.305645	0.196613	0.192347	0.190388	0.346792	0.308181	0.310398	0.178397	0.188346	0.167596			510.4	0.264544	0.270874	0.265315	0.207588	0.206526	0.205053	0.26127	0.256827	0.255056	0.202365	0.194001	0.197896			20.8	0.005	0.0017	-0.0011	0.0122	0.0075	0.0015	0.0411	0.011	0.0039	0.0453	0.0201	0.0199			20.8	0.0009	-0.002	-0.0023	0.0038
510.6	0.376534	0.316542	0.313167	0.201892	0.197577	0.195482	0.35476	0.315303	0.317552	0.183312	0.193525	0.172082			510.6	0.271151	0.277874	0.272188	0.213116	0.212006	0.210483	0.267821	0.26349	0.261639	0.208065	0.199199	0.203173			21.2	0.0061	0.0026	-0.0012	0.0118	0.0075	0.0018	0.0412	0.0109	0.0031	0.0478	0.0218	0.02			21.2	0.0008	-0.0022	-0.0025	0.003
510.8	0.380858	0.32025	0.316905	0.204648	0.200181	0.198097	0.358832	0.318964	0.321223	0.1857	0.196191	0.174403			510.8	0.274541	0.281388	0.2756	0.21595	0.214876	0.213354	0.271103	0.266839	0.264974	0.210874	0.20184	0.205809			21.6	0.006	0.0026	-0.0003	0.0125	0.0072	0.0017	0.0425	0.0123	0.0037	0.0499	0.0229	0.0215			21.6	0.0006	-0.0021	-0.0022	0.0043
511	0.389473	0.327566	0.32423	0.209978	0.205504	0.203445	0.366955	0.326232	0.328702	0.190661	0.201582	0.179061			511	0.281514	0.288271	0.282587	0.22172	0.220471	0.218999	0.278024	0.273681	0.271605	0.216626	0.207213	0.211318			22	0.007	0.0025	0.0004	0.0131	0.0088	0.002	0.0434	0.0121	0.0036	0.0503	0.0235	0.022			22	0.0006	-0.0012	-0.0027	0.0044
511.2	0.393802	0.331209	0.327987	0.212736	0.208141	0.206149	0.371105	0.330029	0.332452	0.193315	0.204171	0.181502			511.2	0.284902	0.291877	0.286131	0.224652	0.223245	0.221829	0.281434	0.277128	0.275062	0.219461	0.210026	0.21413			22.4	0.0064	0.0018	-0.0006	0.0129	0.0076	0.0027	0.0438	0.0129	0.0045	0.052	0.0238	0.0226			22.4	0.0006	-0.0024	-0.0029	0.0033
511.4	0.402611	0.338669	0.335452	0.218354	0.213479	0.21163	0.379337	0.337221	0.33989	0.198575	0.209483	0.186335			511.4	0.2917	0.299104	0.29323	0.230427	0.22901	0.227695	0.288432	0.284113	0.281806	0.225388	0.215451	0.219763			22.8	0.006	0.0029	-0.0005	0.0142	0.0088	0.0019	0.0449	0.0134	0.0041	0.0543	0.0242	0.0233			22.8	0.0014	-0.0019	-0.0019	0.0045
511.6	0.407134	0.342393	0.339214	0.221031	0.216176	0.214334	0.38363	0.340949	0.343651	0.201129	0.212233	0.188727			511.6	0.295189	0.302739	0.296775	0.233348	0.231931	0.230575	0.291808	0.28761	0.285223	0.228322	0.218196	0.222555			23.2	0.0066	0.0034	-0.0009	0.0128	0.0097	0.0015	0.0454	0.0131	0.0051	0.0548	0.0252	0.0234			23.2	0.0011	-0.0021	-0.0021	0.0043
511.8	0.416168	0.349904	0.346646	0.226467	0.221692	0.219804	0.391894	0.3483	0.35126	0.206386	0.217671	0.193515			511.8	0.30209	0.31003	0.303849	0.23921	0.237627	0.236467	0.298711	0.294525	0.292085	0.234117	0.223819	0.228211			23.6	0.006	0.003	-0.0007	0.0143	0.0093	0.0017	0.0462	0.0131	0.0041	0.0567	0.0264	0.0244			23.6	0.0011	-0.0014	-0.0021	0.0047
512	0.42069	0.353634	0.350337	0.229214	0.224418	0.222643	0.396091	0.352069	0.355071	0.209035	0.220461	0.195899			512	0.305628	0.313571	0.307541	0.242197	0.240499	0.239487	0.302113	0.29806	0.295539	0.237114	0.226528	0.231041			24	0.0069	0.0032	-0.0005	0.0138	0.0096	0.0026	0.0479	0.0137	0.0056	0.0572	0.0273	0.025			24	0.0013	-0.0015	-0.0022	0.0046
512.2	0.429775	0.361309	0.358063	0.234922	0.229933	0.228256	0.404545	0.359779	0.362742	0.214401	0.225904	0.200835			512.2	0.312639	0.320956	0.314712	0.24814	0.246317	0.245387	0.309133	0.305167	0.302635	0.242951	0.23209	0.236806			24.4	0.0068	0.0027	-0.0001	0.0145	0.0095	0.0023	0.0481	0.0159	0.0046	0.0593	0.028	0.0262			24.4	0.0007	-0.0023	-0.0026	0.0049
512.4	0.434347	0.365086	0.361859	0.237779	0.232771	0.231108	0.408781	0.363551	0.366571	0.217051	0.228773	0.203291			512.4	0.316224	0.324676	0.318315	0.251073	0.249345	0.248351	0.312737	0.308769	0.306165	0.245943	0.234964	0.239675			24.8	0.0074	0.0038	0.0002	0.0147	0.0105	0.0024	0.0497	0.0156	0.0059	0.06	0.0296	0.0263			24.8	0.001	-0.0016	-0.0029	0.0052
512.6	0.443375	0.372719	0.369661	0.243454	0.238383	0.236806	0.417163	0.370885	0.374233	0.222507	0.234442	0.208345			512.6	0.32334	0.332217	0.325625	0.257002	0.255305	0.254259	0.319965	0.315783	0.313132	0.251985	0.240634	0.245594			25.2	0.0082	0.0035	0.0005	0.0155	0.0109	0.0016	0.0501	0.0163	0.0059	0.0615	0.0294	0.0278			25.2	0.0007	-0.0017	-0.0014	0.005
512.8	0.447932	0.376635	0.373447	0.246425	0.241239	0.239724	0.421437	0.374658	0.377961	0.22524	0.237338	0.210974			512.8	0.326934	0.33606	0.329366	0.260074	0.258332	0.257259	0.323549	0.319312	0.316746	0.254966	0.243529	0.248611			25.6	0.0077	0.0032	-0.0004	0.0152	0.0109	0.0032	0.0512	0.0169	0.0064	0.0628	0.0306	0.0284			25.6	0.0003	-0.0016	-0.0021	0.0049
513	0.457181	0.384414	0.381259	0.252082	0.246979	0.245516	0.429991	0.382407	0.385686	0.230815	0.242988	0.216137			513	0.334152	0.34372	0.336787	0.266204	0.264353	0.26342	0.330805	0.326425	0.323977	0.261036	0.249261	0.254535			26	0.0077	0.0031	0	0.0155	0.011	0.0026	0.0524	0.0171	0.0065	0.0648	0.0304	0.0296			26	0.0014	-0.0024	-0.0029	0.0056
513.2	0.461713	0.388408	0.385112	0.255003	0.249873	0.248488	0.434308	0.386152	0.389546	0.233549	0.245824	0.218671			513.2	0.337749	0.347466	0.340421	0.269321	0.267389	0.266496	0.334435	0.329989	0.327486	0.264196	0.252161	0.257424			26.4	0.0068	0.0037	-0.0005	0.0155	0.0112	0.0023	0.0527	0.0165	0.0066	0.0659	0.0318	0.0296			26.4	0.002	-0.0014	-0.0025	0.0068
513.4	0.47085	0.396234	0.393121	0.260942	0.255405	0.254393	0.442932	0.393656	0.397113	0.239037	0.251414	0.22382			513.4	0.345027	0.355011	0.347898	0.275457	0.273302	0.272772	0.341768	0.337195	0.334769	0.270242	0.257844	0.263365			26.8	0.0077	0.004	0.0002	0.0169	0.0113	0.0023	0.0535	0.0168	0.0063	0.0662	0.0325	0.0309			26.8	0.0009	-0.0012	-0.0023	0.0067
513.6	0.478598	0.402643	0.399535	0.265896	0.260209	0.259234	0.450056	0.399898	0.403541	0.243536	0.256123	0.228085			513.6	0.351046	0.36131	0.354019	0.280617	0.278499	0.277976	0.347835	0.343041	0.340752	0.275411	0.262579	0.26835			27.2	0.0076	0.0039	-0.0003	0.0167	0.0124	0.0028	0.0546	0.0177	0.0073	0.0698	0.0345	0.032			27.2	0.0013	-0.0014	-0.0022	0.0063
513.8	0.484833	0.407737	0.404593	0.269878	0.264052	0.26315	0.455738	0.404978	0.408638	0.247233	0.259932	0.231488			513.8	0.355948	0.366337	0.359117	0.284806	0.282536	0.282136	0.352597	0.34783	0.345603	0.279578	0.266369	0.272363			27.6	0.0084	0.0035	-0.0003	0.0164	0.0127	0.0032	0.0565	0.0186	0.0075	0.0696	0.0357	0.0321			27.6	0.0017	-0.0018	-0.0025	0.0061
514	0.492519	0.414364	0.410853	0.27471	0.268915	0.268174	0.462942	0.411367	0.414939	0.251899	0.264695	0.235886			514	0.362099	0.372686	0.365553	0.290089	0.287646	0.287339	0.358648	0.353719	0.351719	0.284632	0.271237	0.277475			28	0.0089	0.0048	0.0002	0.0169	0.0131	0.002	0.0556	0.0181	0.0078	0.0717	0.0353	0.034			28	0.0016	-0.0016	-0.0025	0.007
514.2	0.498631	0.419696	0.416037	0.278595	0.27271	0.272181	0.468734	0.416481	0.420118	0.255676	0.268542	0.239372			514.2	0.367004	0.377732	0.370543	0.2943	0.291671	0.291508	0.363538	0.358551	0.356618	0.288716	0.275237	0.281504			28.4	0.0077	0.0035	0.0001	0.0168	0.0135	0.0028	0.0579	0.0192	0.0078	0.0734	0.0365	0.0338			28.4	0.0021	-0.002	-0.0026	0.0063
514.4	0.506366	0.42636	0.422526	0.283595	0.277528	0.277079	0.47593	0.422854	0.426429	0.260395	0.273453	0.243829			514.4	0.372992	0.384099	0.37672	0.299601	0.296849	0.296808	0.369468	0.364464	0.362752	0.293922	0.280102	0.286615			28.8	0.0084	0.0047	-0.0001	0.0174	0.0145	0.0032	0.0573	0.0196	0.0081	0.0748	0.0374	0.0346			28.8	0.0027	-0.0017	-0.002	0.0074
514.6	0.512573	0.431658	0.427612	0.287489	0.281379	0.281033	0.481552	0.427923	0.43152	0.264143	0.277294	0.247355			514.6	0.377842	0.389107	0.381544	0.30382	0.301009	0.301029	0.374226	0.369336	0.367571	0.298173	0.283939	0.290631			29.2	0.0088	0.0035	-0.0003	0.0178	0.0141	0.0037	0.059	0.0199	0.0076	0.0743	0.0388	0.0355			29.2	0.002	-0.0011	-0.0023	0.0071
514.8	0.52026	0.43824	0.434016	0.292424	0.286295	0.286097	0.488698	0.434317	0.437925	0.268787	0.282161	0.251725			514.8	0.384021	0.395451	0.38767	0.309161	0.306093	0.306164	0.380277	0.375397	0.37369	0.303457	0.288775	0.295621			29.6	0.0086	0.0048	0.0003	0.018	0.0139	0.0034	0.0597	0.0214	0.0081	0.0767	0.0395	0.037			29.6	0.0012	-0.002	-0.0018	0.0066
515	0.526308	0.443439	0.439244	0.296495	0.290233	0.290181	0.494339	0.439453	0.443002	0.272561	0.286104	0.255318			515	0.388929	0.400613	0.392713	0.313425	0.310192	0.310333	0.385143	0.380281	0.378625	0.307746	0.292695	0.299719			30	0.0094	0.0042	0.0006	0.0186	0.0148	0.0034	0.0604	0.0216	0.0089	0.0782	0.0403	0.0375			30	0.0016	-0.0012	-0.0029	0.0069
515.2	0.533996	0.449926	0.445757	0.30165	0.295116	0.29527	0.501579	0.445873	0.449416	0.277331	0.291105	0.259865			515.2	0.395188	0.407043	0.399088	0.318751	0.315584	0.315518	0.391382	0.386361	0.384737	0.313028	0.297615	0.304853			30.4	0.0087	0.0044	0.0004	0.0187	0.0152	0.0034	0.061	0.022	0.0093	0.0798	0.0413	0.0387			30.4	0.0021	-0.001	-0.0026	0.0072
515.4	0.540011	0.455133	0.451059	0.305732	0.299101	0.299284	0.50745	0.450932	0.454436	0.281134	0.295087	0.263509			515.4	0.400124	0.41226	0.404201	0.323144	0.319764	0.319736	0.396387	0.391219	0.389663	0.317276	0.301651	0.308974			30.8	0.009	0.0033	0.0004	0.0188	0.0158	0.0049	0.0626	0.0229	0.0094	0.0812	0.0427	0.0404			30.8	0.0025	-0.0013	-0.0022	0.008
515.6	0.54761	0.461652	0.457466	0.310827	0.304199	0.304321	0.514584	0.457247	0.460901	0.285766	0.30005	0.267997			515.6	0.406224	0.41866	0.410535	0.328574	0.325081	0.325115	0.402479	0.397254	0.39568	0.322623	0.306767	0.314175			31.2	0.0089	0.0047	0.0005	0.0188	0.0157	0.003	0.0633	0.0233	0.0091	0.0826	0.0434	0.0401			31.2	0.0016	-0.0011	-0.0026	0.008
515.8	0.553659	0.466869	0.462681	0.315037	0.308199	0.308252	0.520353	0.462205	0.465949	0.289542	0.304019	0.271538			515.8	0.41111	0.423773	0.41571	0.332916	0.329222	0.329339	0.407312	0.402119	0.400525	0.326838	0.310785	0.318393			31.6	0.0091	0.0053	-0.0009	0.0195	0.0157	0.0038	0.0633	0.0228	0.0096	0.0832	0.0448	0.042			31.6	0.002	-0.0013	-0.0019	0.0089
516	0.559807	0.472024	0.467847	0.319119	0.312238	0.312268	0.526016	0.46729	0.470871	0.293305	0.307989	0.275148			516	0.415951	0.428841	0.42075	0.337148	0.333486	0.333576	0.41217	0.407123	0.405366	0.331099	0.314765	0.322501			32	0.0099	0.005	0.0006	0.0191	0.0165	0.0036	0.0638	0.0228	0.0102	0.0843	0.046	0.0428			32	0.0022	-0.0009	-0.0023	0.008
516.2	0.567643	0.478462	0.474366	0.324124	0.317255	0.317263	0.533168	0.473661	0.47724	0.298076	0.312898	0.279613			516.2	0.421981	0.435319	0.427038	0.342461	0.338795	0.33895	0.418369	0.413267	0.4114	0.33636	0.31972	0.327634			32.4	0.0099	0.0043	0.0005	0.0196	0.0174	0.0041	0.0652	0.0242	0.0105	0.0869	0.0465	0.0438			32.4	0.0023	-0.0008	-0.0025	0.0083
516.4	0.573741	0.48377	0.479432	0.328329	0.321285	0.32138	0.53884	0.478654	0.482361	0.301936	0.316973	0.283241			516.4	0.42693	0.440455	0.432244	0.346776	0.343142	0.343161	0.423335	0.418092	0.416148	0.340689	0.323798	0.331825			32.8	0.01	0.0053	0.0008	0.0203	0.0169	0.0038	0.0662	0.0249	0.0115	0.0873	0.0471	0.044			32.8	0.002	-0.0009	-0.0024	0.0076
516.6	0.581586	0.490337	0.485861	0.333448	0.326253	0.326547	0.545782	0.484996	0.488603	0.30678	0.321992	0.28782			516.6	0.43313	0.446933	0.438922	0.352212	0.34851	0.348481	0.42956	0.424051	0.422116	0.346004	0.328856	0.337128			33.2	0.01	0.0044	-0.0001	0.0211	0.0178	0.005	0.067	0.026	0.0107	0.089	0.0477	0.0449			33.2	0.0023	-0.0011	-0.0019	0.0088
516.8	0.587764	0.495596	0.491078	0.337461	0.330393	0.330521	0.551458	0.490022	0.493704	0.310643	0.326123	0.291375			516.8	0.43809	0.452064	0.443854	0.356545	0.352774	0.352804	0.43448	0.428877	0.426825	0.350363	0.332995	0.341368			33.6	0.0101	0.0056	0	0.0207	0.0178	0.0043	0.0675	0.0263	0.011	0.0902	0.0484	0.0461			33.6	0.0026	-0.0016	-0.0021	0.0084
517	0.595443	0.502156	0.497645	0.34264	0.335364	0.335638	0.558449	0.496432	0.500065	0.315535	0.331342	0.295973			517	0.444202	0.458596	0.450122	0.361974	0.357984	0.358139	0.440561	0.435007	0.432814	0.355798	0.338175	0.346695			34	0.0111	0.0049	0.0002	0.0206	0.0185	0.0031	0.0679	0.0262	0.0106	0.0918	0.0506	0.0467			34	0.0026	-0.002	-0.003	0.0095
517.2	0.60462	0.510271	0.50561	0.348786	0.341443	0.341744	0.566807	0.503844	0.507627	0.321428	0.337576	0.301538			517.2	0.451466	0.466537	0.457668	0.36853	0.364454	0.364625	0.447901	0.442207	0.440038	0.36226	0.344389	0.352961			34.4	0.0104	0.0057	0.0001	0.0208	0.0181	0.0056	0.0694	0.0275	0.0112	0.0928	0.0526	0.0485			34.4	0.002	-0.0006	-0.0022	0.0095
517.4	0.609155	0.51401	0.509537	0.351992	0.344471	0.344883	0.570988	0.507538	0.51146	0.324362	0.340628	0.304238			517.4	0.455227	0.470322	0.461368	0.371758	0.367739	0.367925	0.451537	0.445903	0.443808	0.365518	0.347442	0.356157			34.8	0.0111	0.0052	0.0003	0.0217	0.0197	0.0039	0.0705	0.0272	0.0121	0.0935	0.0524	0.0488			34.8	0.0022	-0.0008	-0.0031	0.0094
517.6	0.618549	0.521644	0.517112	0.358424	0.350484	0.350975	0.579418	0.515064	0.518926	0.330356	0.346702	0.309785			517.6	0.462679	0.478139	0.468951	0.378496	0.374222	0.374354	0.458585	0.453231	0.450983	0.372111	0.35355	0.36257			35.2	0.0103	0.0056	0.0009	0.0217	0.0199	0.0048	0.0703	0.0273	0.0116	0.0954	0.0537	0.0505			35.2	0.0032	-0.001	-0.0018	0.0102
517.8	0.623238	0.525647	0.521089	0.361626	0.353607	0.354215	0.583582	0.518821	0.522738	0.333359	0.349776	0.312563			517.8	0.466418	0.482053	0.472727	0.381831	0.377382	0.377606	0.462277	0.456977	0.454543	0.375234	0.356669	0.365802			35.6	0.0102	0.0055	0.0009	0.0216	0.0202	0.0055	0.0718	0.0283	0.0122	0.0955	0.0548	0.0509			35.6	0.0019	-0.0017	-0.0031	0.0093
518	0.632489	0.533614	0.528983	0.368011	0.359991	0.360481	0.591994	0.526188	0.530241	0.339256	0.355968	0.318159			518	0.473736	0.490016	0.480648	0.388313	0.383968	0.384197	0.469586	0.464227	0.46173	0.381729	0.362771	0.372225			36	0.0113	0.0063	0.0007	0.0222	0.0203	0.0049	0.0717	0.0297	0.0126	0.0975	0.0551	0.0519			36	0.0033	-0.0015	-0.0023	0.0101
518.2	0.637044	0.537565	0.532814	0.371181	0.363147	0.363522	0.596334	0.530027	0.533954	0.342279	0.359068	0.320973			518.2	0.477536	0.493967	0.484609	0.391706	0.387301	0.387528	0.473162	0.467904	0.465231	0.384864	0.365987	0.375507			36.4	0.011	0.0059	0.0004	0.023	0.0213	0.0051	0.0721	0.0302	0.0125	0.0986	0.0554	0.0538			36.4	0.0029	-0.0008	-0.0029	0.0099
518.4	0.646457	0.545235	0.540556	0.377529	0.369341	0.369739	0.604716	0.537447	0.541406	0.348235	0.365106	0.326556			518.4	0.484764	0.501914	0.492126	0.398167	0.393765	0.394144	0.480653	0.475025	0.472436	0.391236	0.372256	0.381958			36.8	0.0115	0.0065	0.0003	0.0228	0.0209	0.0044	0.0732	0.0304	0.0126	0.0989	0.0571	0.0536			36.8	0.0031	-0.0009	-0.0017	0.0103
518.6	0.651044	0.549325	0.544419	0.380454	0.372479	0.372782	0.608877	0.541155	0.545091	0.351184	0.368233	0.329317			518.6	0.488516	0.505914	0.495874	0.401475	0.396951	0.397529	0.484169	0.478709	0.476144	0.394673	0.375372	0.385193			37.2	0.0123	0.0056	0.0005	0.023	0.0221	0.0054	0.074	0.0307	0.0137	0.1018	0.0579	0.0555			37.2	0.0031	0	-0.0026	0.011
518.8	0.660301	0.557089	0.552107	0.386952	0.37871	0.379007	0.617291	0.548534	0.552716	0.357155	0.374378	0.334932			518.8	0.495814	0.513594	0.503417	0.408092	0.403505	0.404002	0.491243	0.485847	0.483169	0.401191	0.381505	0.39173			37.6	0.0118	0.0068	0.0002	0.0233	0.0218	0.0049	0.075	0.0315	0.0147	0.1017	0.0589	0.0565			37.6	0.0034	-0.0004	-0.002	0.0102
519	0.664954	0.560933	0.556067	0.390107	0.38187	0.382207	0.621469	0.552129	0.556526	0.360252	0.377504	0.337757			519	0.499579	0.51757	0.507253	0.411554	0.406716	0.407192	0.494801	0.489545	0.486732	0.404606	0.384496	0.394906			38	0.0123	0.0057	0.0016	0.0249	0.0236	0.0055	0.0764	0.0304	0.0141	0.1021	0.0603	0.0578			38	0.0038	-0.0008	-0.002	0.0109
519.2	0.674165	0.568682	0.563752	0.396275	0.388103	0.38863	0.629635	0.559449	0.563836	0.366296	0.383687	0.343307			519.2	0.506906	0.525434	0.514783	0.418295	0.41343	0.413934	0.501926	0.496703	0.493856	0.411316	0.390676	0.401256			38.4	0.012	0.0064	0.0004	0.024	0.023	0.006	0.0767	0.0323	0.0149	0.1034	0.0618	0.0591			38.4	0.0048	-0.001	-0.0019	0.0105
519.4	0.67879	0.572651	0.567755	0.399591	0.391185	0.391871	0.633738	0.563155	0.567706	0.369314	0.386654	0.346189			519.4	0.510689	0.529506	0.518461	0.421874	0.416663	0.417313	0.505569	0.50018	0.497449	0.414645	0.393774	0.404486			38.8	0.0118	0.0073	0.0006	0.025	0.0234	0.0057	0.0773	0.0335	0.014	0.1049	0.0612	0.059			38.8	0.0043	-0.0014	-0.0019	0.0115
519.6	0.687918	0.58053	0.575396	0.405981	0.397453	0.398266	0.642052	0.570396	0.575184	0.375434	0.39295	0.351809			519.6	0.51835	0.537217	0.525785	0.428543	0.423233	0.424027	0.51261	0.507125	0.504482	0.421242	0.400066	0.410981			39.2	0.0127	0.0071	0.0013	0.0244	0.0232	0.0049	0.0778	0.0339	0.0145	0.1059	0.0627	0.0606			39.2	0.004	-0.0008	-0.0023	0.0124
519.8	0.692588	0.584487	0.579209	0.409018	0.400485	0.401508	0.646196	0.574153	0.578805	0.378412	0.3961	0.354613			519.8	0.521946	0.541073	0.529567	0.431957	0.426578	0.427432	0.516193	0.510843	0.508181	0.424723	0.403139	0.414219			39.6	0.0129	0.0075	0.001	0.0237	0.0239	0.0057	0.078	0.0342	0.0159	0.1068	0.0625	0.0612			39.6	0.0041	0.0001	-0.0015	0.0119
520	0.701975	0.592088	0.586894	0.415437	0.406971	0.407669	0.654437	0.581281	0.586222	0.384431	0.402311	0.360157			520	0.529215	0.548904	0.537161	0.438543	0.43332	0.434108	0.523029	0.518046	0.515104	0.431335	0.409313	0.420554			40	0.0121	0.0076	0.0008	0.0261	0.0234	0.005	0.0794	0.0343	0.0152	0.1077	0.0645	0.0633			40	0.0043	-0.0005	-0.0023	0.012
520.2	0.709756	0.598535	0.593389	0.420925	0.412235	0.41309	0.661218	0.587355	0.592399	0.389511	0.40758	0.364858			520.2	0.535267	0.555582	0.543544	0.444229	0.438916	0.439542	0.529138	0.523983	0.521073	0.436847	0.414405	0.425869			40.4	0.0124	0.0076	0.0013	0.0251	0.025	0.0064	0.0797	0.035	0.015	0.1086	0.0653	0.0641			40.4	0.0043	-0.0009	-0.0023	0.0114
520.4	0.7161	0.603829	0.598492	0.425206	0.416486	0.417445	0.666795	0.592074	0.597306	0.393651	0.411758	0.368727			520.4	0.54027	0.56103	0.548832	0.448769	0.443412	0.443954	0.534089	0.528724	0.525792	0.441397	0.418449	0.430109			40.8	0.0133	0.0079	0.0012	0.0266	0.0252	0.0058	0.081	0.0351	0.0158	0.1088	0.0663	0.0646			40.8	0.0047	0.0001	-0.002	0.0115
520.6	0.723861	0.610324	0.604898	0.430744	0.421986	0.422898	0.673714	0.598175	0.603473	0.398678	0.41706	0.373639			520.6	0.546618	0.567632	0.555227	0.4545	0.449161	0.449612	0.540065	0.534737	0.531711	0.447054	0.423778	0.435558			41.2	0.0127	0.0083	0.001	0.0253	0.0249	0.0064	0.0806	0.0364	0.0167	0.111	0.0676	0.0659			41.2	0.0051	-0.001	-0.0022	0.0128
520.8	0.730115	0.61559	0.610253	0.435096	0.426339	0.427164	0.67923	0.603239	0.608368	0.402786	0.421361	0.377652			520.8	0.551647	0.572923	0.560368	0.458988	0.453677	0.454102	0.544692	0.539476	0.536303	0.451516	0.428113	0.439944			41.6	0.0128	0.0072	0.0009	0.0258	0.0261	0.0064	0.0815	0.0375	0.0163	0.1114	0.0676	0.0668			41.6	0.0042	0.0001	-0.0013	0.0128
521	0.737729	0.622117	0.616877	0.440503	0.43182	0.432596	0.685925	0.609296	0.614607	0.407873	0.426769	0.382633			521	0.557996	0.579605	0.567114	0.464679	0.459229	0.459852	0.550807	0.545426	0.54214	0.457177	0.433381	0.445456			42	0.0129	0.008	0.0006	0.0267	0.0263	0.007	0.0819	0.0375	0.0173	0.1123	0.0693	0.0684			42	0.0053	-0.0001	-0.002	0.0131
521.2	0.743982	0.627336	0.622185	0.444928	0.436332	0.436861	0.691377	0.614129	0.619583	0.411955	0.431065	0.386607			521.2	0.563041	0.58493	0.572396	0.469079	0.463765	0.464483	0.555515	0.550208	0.546972	0.461792	0.437623	0.44991			42.4	0.0136	0.0086	0.0004	0.0276	0.0276	0.0073	0.0821	0.0383	0.0171	0.1128	0.0693	0.0695			42.4	0.0049	-0.0007	-0.0011	0.0128
521.4	0.750275	0.632563	0.627521	0.449383	0.44059	0.441311	0.69681	0.618988	0.624446	0.416172	0.435368	0.390484			521.4	0.568161	0.590233	0.577438	0.473731	0.468208	0.468907	0.560164	0.55501	0.551799	0.4664	0.441882	0.454213			42.8	0.0131	0.0088	0.0004	0.0279	0.0269	0.0071	0.084	0.0373	0.0183	0.1135	0.0705	0.0711			42.8	0.0049	-0.0007	-0.0031	0.0136
521.6	0.758183	0.639109	0.634359	0.454941	0.446016	0.446857	0.703512	0.625002	0.630622	0.421368	0.440882	0.395425			521.6	0.574417	0.596884	0.583927	0.479517	0.473809	0.474444	0.56599	0.560782	0.557872	0.4723	0.447211	0.459722			43.2	0.0129	0.009	0.0001	0.0275	0.0284	0.0071	0.0829	0.0386	0.0171	0.1148	0.0718	0.0711			43.2	0.0047	0.0002	-0.0022	0.0136
521.8	0.76444	0.644455	0.639603	0.459355	0.450498	0.451339	0.70893	0.629983	0.635597	0.425672	0.445314	0.399419			521.8	0.57951	0.602216	0.589129	0.484266	0.478541	0.479136	0.570551	0.565525	0.56254	0.476933	0.451411	0.464182			43.6	0.014	0.0089	0.0018	0.0283	0.0285	0.0065	0.084	0.0397	0.0175	0.1153	0.0724	0.0724			43.6	0.0054	-0.0006	-0.0023	0.0139
522	0.772251	0.650991	0.64634	0.46495	0.456003	0.456939	0.715652	0.636161	0.641724	0.43106	0.450891	0.404442			522	0.585711	0.608985	0.595808	0.490075	0.484424	0.485	0.57624	0.571488	0.568361	0.482587	0.456772	0.469784			44	0.0135	0.0088	0.0018	0.0287	0.0284	0.0076	0.0846	0.0406	0.0169	0.116	0.0729	0.0736			44	0.0058	0	-0.0017	0.0135
522.2	0.778644	0.656456	0.651671	0.469346	0.460505	0.461533	0.720907	0.641018	0.646505	0.435283	0.455367	0.408538			522.2	0.59081	0.614401	0.60097	0.494728	0.489092	0.48981	0.580895	0.576262	0.573066	0.487279	0.461254	0.474349			44.4	0.0138	0.0094	0.0007	0.0279	0.0293	0.0067	0.0859	0.0408	0.0183	0.1164	0.0741	0.0751			44.4	0.0049	-0.0001	-0.0014	0.0143
522.4	0.786456	0.663184	0.658409	0.474943	0.465979	0.467088	0.727637	0.647177	0.652362	0.440543	0.460991	0.413613			522.4	0.597011	0.621065	0.607515	0.500562	0.494956	0.495784	0.586864	0.582218	0.578978	0.49306	0.46676	0.480075			44.8	0.0134	0.0092	0.0008	0.0286	0.0306	0.0072	0.0861	0.0419	0.0191	0.1177	0.0755	0.0755			44.8	0.0056	-0.0001	-0.0017	0.0129
522.6	0.792799	0.668745	0.663971	0.479545	0.470487	0.471647	0.733143	0.652149	0.657281	0.444875	0.465491	0.417753			522.6	0.602293	0.626518	0.612903	0.505223	0.499631	0.500542	0.591745	0.58698	0.583712	0.497577	0.471173	0.484698			45.2	0.0143	0.0089	0.0015	0.029	0.0304	0.0077	0.087	0.042	0.0199	0.1188	0.0755	0.0774			45.2	0.0049	0	-0.0025	0.0134
522.8	0.800694	0.67552	0.670827	0.485148	0.476132	0.477303	0.740051	0.658296	0.663366	0.450484	0.471201	0.422767			522.8	0.608886	0.633167	0.619762	0.510865	0.505507	0.506369	0.597796	0.592993	0.58959	0.503291	0.476827	0.490616			45.6	0.0143	0.0085	0.0018	0.0291	0.0302	0.008	0.0872	0.0425	0.0202	0.1187	0.0779	0.0779			45.6	0.0056	0.0002	-0.002	0.0144
523	0.81031	0.683733	0.679189	0.491974	0.483016	0.484172	0.748391	0.66579	0.670887	0.457123	0.478179	0.429066			523	0.616297	0.64167	0.627928	0.518088	0.512384	0.513516	0.605107	0.600349	0.59682	0.510671	0.483684	0.497293			46	0.0146	0.0093	0.0015	0.029	0.0297	0.008	0.0872	0.0435	0.0202	0.1193	0.0781	0.0794			46	0.0048	-0.0012	-0.0016	0.015
523.2	0.814983	0.687871	0.683417	0.49558	0.486656	0.487599	0.752623	0.669535	0.674617	0.460421	0.481613	0.432291			523.2	0.62021	0.645743	0.632029	0.521673	0.515872	0.517216	0.608493	0.604004	0.600351	0.514118	0.487057	0.501012			46.4	0.0154	0.0089	0.0018	0.0305	0.0319	0.0074	0.0883	0.0439	0.0206	0.1193	0.0786	0.0794			46.4	0.0058	-0.0001	-0.002	0.0144
523.4	0.824339	0.696239	0.69184	0.502607	0.493482	0.494646	0.761148	0.677053	0.682125	0.46708	0.488544	0.438692			523.4	0.628187	0.654025	0.640101	0.529004	0.522776	0.524742	0.615621	0.611343	0.607693	0.521354	0.493996	0.508248			46.8	0.015	0.0089	0.002	0.0303	0.0314	0.0071	0.0881	0.0446	0.0205	0.1201	0.0795	0.0808			46.8	0.0062	0.0001	-0.0017	0.0139
523.6	0.829186	0.700309	0.695949	0.506066	0.496963	0.498217	0.765351	0.680778	0.685781	0.470418	0.492029	0.441936			523.6	0.632366	0.658258	0.644194	0.532709	0.526411	0.528517	0.619037	0.615053	0.611233	0.524976	0.49749	0.511865			47.2	0.0143	0.0098	0.0011	0.0296	0.0328	0.0074	0.0889	0.0453	0.0208	0.1215	0.0798	0.0827			47.2	0.0062	-0.0011	-0.0021	0.0153
523.8	0.838884	0.708645	0.704538	0.513131	0.50426	0.505413	0.773644	0.688461	0.693232	0.477038	0.499144	0.448327			523.8	0.640301	0.666313	0.652377	0.539964	0.533812	0.535822	0.62602	0.622536	0.618515	0.53223	0.504582	0.518948			47.6	0.0161	0.0093	0.0009	0.0304	0.0326	0.0087	0.0897	0.0459	0.0206	0.1213	0.0806	0.0826			47.6	0.0052	-0.0001	-0.0017	0.0155
524	0.843736	0.712774	0.708794	0.516728	0.507713	0.508865	0.77787	0.692218	0.697079	0.480557	0.502687	0.451421			524	0.644092	0.670501	0.656629	0.543454	0.537393	0.53949	0.629629	0.625972	0.621973	0.535847	0.507943	0.522498			48	0.0149	0.0093	0.0019	0.0305	0.0333	0.0085	0.09	0.0469	0.0217	0.1224	0.0821	0.0844			48	0.006	0.0004	-0.0023	0.0152
524.2	0.853512	0.721124	0.717253	0.5237	0.514854	0.51615	0.786347	0.699614	0.704697	0.487463	0.509868	0.457652			524.2	0.652133	0.678864	0.664903	0.550673	0.54475	0.546781	0.637132	0.63342	0.629218	0.543578	0.514677	0.52955			48.4	0.0155	0.0102	0.0017	0.0314	0.0336	0.0086	0.0903	0.0474	0.0217	0.1242	0.0824	0.0843			48.4	0.0063	0.0006	-0.0019	0.0157
524.4	0.858389	0.725404	0.721569	0.527297	0.518459	0.519755	0.790722	0.703278	0.708414	0.490852	0.513467	0.460739			524.4	0.656183	0.683131	0.669022	0.554231	0.548528	0.550461	0.640744	0.637189	0.63304	0.547281	0.518313	0.533119			48.8	0.0152	0.0097	0.0017	0.0312	0.033	0.0084	0.0911	0.0479	0.0217	0.1236	0.0829	0.086			48.8	0.0061	0.0008	-0.0015	0.0162
524.6	0.86807	0.733688	0.729964	0.534396	0.525532	0.527027	0.79907	0.710792	0.715872	0.497722	0.520563	0.466942			524.6	0.664056	0.691576	0.6772	0.561815	0.555988	0.557697	0.648126	0.64441	0.640381	0.554769	0.525295	0.540401			49.2	0.0155	0.0108	0.0021	0.0315	0.0347	0.0088	0.0912	0.0488	0.0219	0.1244	0.0839	0.0872			49.2	0.0063	-0.0003	-0.002	0.0156
524.8	0.872809	0.737832	0.734041	0.538074	0.529146	0.530715	0.80354	0.714725	0.719675	0.501303	0.52416	0.470218			524.8	0.668162	0.695742	0.681274	0.565624	0.559719	0.561552	0.651873	0.647966	0.643835	0.55859	0.528905	0.544101			49.6	0.0164	0.0105	0.0018	0.0316	0.0356	0.0082	0.0917	0.0491	0.0235	0.1241	0.0846	0.0866			49.6	0.0065	0	-0.0017	0.0164
525	0.8827	0.746403	0.742514	0.545433	0.53638	0.53818	0.811819	0.722192	0.72715	0.508223	0.531306	0.476731			525	0.676331	0.704196	0.689511	0.573039	0.56718	0.569148	0.659219	0.655293	0.650948	0.56578	0.536116	0.551359			50	0.0158	0.0113	0.0023	0.0323	0.0349	0.0092	0.0917	0.0504	0.0229	0.126	0.0856	0.0893			50	0.0069	-0.0001	-0.0017	0.0161
525.2	0.887702	0.750795	0.746897	0.549159	0.539954	0.541739	0.815957	0.725869	0.730826	0.511731	0.535009	0.47987			525.2	0.680191	0.708316	0.693842	0.576814	0.570873	0.572853	0.662741	0.659133	0.654526	0.569591	0.539523	0.554992			50.4	0.0168	0.0103	0.0015	0.0322	0.0357	0.0093	0.093	0.0508	0.0238	0.126	0.0857	0.0898			50.4	0.0068	-0.0005	-0.0017	0.0164
525.4	0.897688	0.759424	0.755829	0.556564	0.547404	0.549031	0.824572	0.733371	0.738409	0.518553	0.542125	0.486315			525.4	0.688485	0.716947	0.702022	0.584349	0.578354	0.580339	0.670153	0.666447	0.661926	0.577096	0.546877	0.562301			50.8	0.0158	0.0112	0.0024	0.0326	0.0371	0.0093	0.0931	0.0515	0.0235	0.1279	0.0872	0.0913			50.8	0.0071	0.0002	-0.0017	0.0164
525.6	0.906048	0.766449	0.763145	0.562838	0.55355	0.555238	0.831816	0.739569	0.744938	0.524603	0.548239	0.491679			525.6	0.695358	0.72427	0.709208	0.590859	0.584657	0.586712	0.676402	0.672538	0.668157	0.583474	0.552834	0.568305			51.2	0.0158	0.0106	0.0021	0.0324	0.0364	0.0092	0.0932	0.0517	0.0245	0.127	0.0869	0.092			51.2	0.0069	0.0001	-0.0023	0.0168
525.8	0.91291	0.772062	0.768932	0.567877	0.5585	0.560297	0.83761	0.74461	0.750069	0.529452	0.553065	0.496043			525.8	0.700959	0.730097	0.714869	0.595921	0.589677	0.591807	0.681304	0.677362	0.673083	0.58859	0.557608	0.57311			51.6	0.0174	0.0108	0.0031	0.0333	0.0373	0.0102	0.0939	0.0521	0.0246	0.1279	0.0878	0.0925			51.6	0.0074	0.0004	-0.0014	0.0169
526	0.921117	0.779304	0.776169	0.574214	0.564723	0.566626	0.844779	0.750952	0.756606	0.535349	0.5591	0.501679			526	0.707693	0.737265	0.721783	0.602363	0.596243	0.598166	0.687402	0.683494	0.67927	0.595121	0.563776	0.579134			52	0.0162	0.0113	0.0026	0.033	0.0375	0.0096	0.0938	0.0529	0.0248	0.1278	0.0882	0.0924			52	0.0062	0.0005	-0.0022	0.0171
526.2	0.927645	0.785177	0.782017	0.5793	0.569676	0.571641	0.850321	0.756096	0.761861	0.540009	0.563946	0.506249			526.2	0.713	0.742993	0.727504	0.607618	0.601436	0.603179	0.692355	0.688528	0.684116	0.600148	0.568582	0.583875			52.4	0.0167	0.0121	0.0024	0.0341	0.0381	0.0096	0.0952	0.0532	0.0253	0.1288	0.088	0.0932			52.4	0.0071	-0.0001	-0.002	0.0174
526.4	0.934178	0.790912	0.787694	0.584474	0.574715	0.576828	0.855928	0.761078	0.766836	0.544702	0.568832	0.510686			526.4	0.718585	0.748623	0.73328	0.612876	0.606647	0.608277	0.697164	0.693624	0.688981	0.605119	0.573221	0.589123			52.8	0.0169	0.0114	0.0028	0.0339	0.038	0.0099	0.0943	0.0553	0.0261	0.1293	0.0895	0.0949			52.8	0.0067	0.0002	-0.0019	0.0171
526.6	0.942402	0.798011	0.79486	0.590865	0.580939	0.583268	0.862748	0.767434	0.773332	0.550664	0.574944	0.516215			526.6	0.725382	0.755779	0.740159	0.619376	0.613149	0.614491	0.70334	0.699866	0.695146	0.611383	0.579042	0.59527			53.2	0.0165	0.0126	0.0019	0.0343	0.0387	0.0096	0.0947	0.0546	0.0253	0.1297	0.0903	0.0957			53.2	0.0073	0.001	-0.0011	0.0173
526.8	0.949203	0.803766	0.800652	0.595944	0.585879	0.588274	0.868305	0.772476	0.77835	0.555425	0.579876	0.5207			526.8	0.730724	0.761556	0.745658	0.624476	0.618321	0.61949	0.708399	0.704737	0.700168	0.616526	0.583813	0.600097			53.6	0.017	0.0125	0.0018	0.0345	0.0391	0.0104	0.0951	0.0561	0.0264	0.1305	0.0912	0.0962			53.6	0.0077	0.0006	-0.0013	0.0183
527	0.957614	0.811206	0.807968	0.602246	0.592169	0.594496	0.875351	0.778744	0.784643	0.561435	0.586165	0.526298			527	0.73747	0.768613	0.75253	0.630839	0.624614	0.62587	0.71471	0.710953	0.706422	0.623005	0.590062	0.606417			54	0.0169	0.0112	0.0036	0.0355	0.04	0.0096	0.0954	0.0565	0.0257	0.1294	0.0903	0.0984			54	0.0076	-0.0004	-0.0013	0.0178
527.2	0.963982	0.817016	0.813449	0.607254	0.597178	0.599401	0.881004	0.783764	0.789697	0.566205	0.590938	0.530797			527.2	0.742815	0.774362	0.758164	0.635995	0.629699	0.631084	0.719493	0.715868	0.711341	0.627993	0.594843	0.611387			54.4	0.0174	0.0119	0.0027	0.0347	0.0405	0.0098	0.0954	0.057	0.0272	0.1312	0.0915	0.0989			54.4	0.0067	0.0019	-0.001	0.0181
527.4	0.971938	0.824086	0.820441	0.613569	0.603407	0.60583	0.88802	0.789997	0.795922	0.572063	0.59714	0.536391			527.4	0.749478	0.781592	0.765093	0.642719	0.636046	0.637691	0.725508	0.722353	0.717494	0.634312	0.600814	0.617583			54.8	0.0173	0.0119	0.0025	0.0357	0.0419	0.0102	0.0969	0.0571	0.0268	0.1309	0.0926	0.0987			54.8	0.0076	0.0008	-0.0015	0.0185
527.6	0.978243	0.82994	0.826088	0.618715	0.608378	0.610805	0.893517	0.794859	0.800968	0.576828	0.602081	0.540915			527.6	0.754725	0.787221	0.770479	0.648045	0.641225	0.643011	0.730268	0.72728	0.722164	0.639098	0.605708	0.622664			55.2	0.0176	0.0125	0.0016	0.0357	0.042	0.0107	0.0978	0.0581	0.0284	0.1316	0.0928	0.0998			55.2	0.0064	0.0008	-0.0022	0.0188
527.8	0.986416	0.837341	0.833241	0.625063	0.614619	0.617188	0.900124	0.80115	0.807266	0.582959	0.608239	0.546593			527.8	0.761209	0.794134	0.777253	0.654532	0.647693	0.649509	0.736323	0.733274	0.727927	0.64527	0.611621	0.628959			55.6	0.0174	0.0116	0.0028	0.0362	0.0418	0.0107	0.0962	0.0587	0.0287	0.1327	0.0934	0.1008			55.6	0.0086	0.0011	-0.001	0.0195
528	0.996024	0.846246	0.841836	0.632671	0.622127	0.624827	0.908094	0.808597	0.814733	0.590132	0.615708	0.553375			528	0.769173	0.80276	0.785512	0.662177	0.65519	0.657205	0.743324	0.740729	0.735118	0.652814	0.618939	0.636196			56	0.0181	0.0122	0.0026	0.035	0.0432	0.0108	0.0973	0.0591	0.0283	0.1317	0.0942	0.1019			56	0.0081	0.0009	-0.0015	0.0185
528.2	1.00099	0.850499	0.846263	0.636542	0.62594	0.628567	0.912176	0.812338	0.818495	0.593639	0.619295	0.556749			528.2	0.773003	0.807149	0.7897	0.666038	0.659038	0.661069	0.746996	0.744363	0.738827	0.656593	0.622612	0.63996			56.4	0.0184	0.013	0.0024	0.0361	0.0432	0.0123	0.097	0.0609	0.0287	0.1325	0.0944	0.1023			56.4	0.0081	0.0015	-0.0014	0.0191
528.4	1.01055	0.859076	0.854728	0.64405	0.6334	0.636103	0.920522	0.819461	0.825776	0.601103	0.626901	0.563505			528.4	0.780946	0.815555	0.798174	0.673694	0.666644	0.668777	0.754042	0.751705	0.746128	0.664428	0.62985	0.647592			56.8	0.0179	0.0129	0.003	0.0354	0.0431	0.0106	0.0973	0.0604	0.0292	0.1328	0.0947	0.103			56.8	0.0071	0.0008	-0.0006	0.0194
528.6	1.01524	0.863376	0.858774	0.647755	0.63721	0.639912	0.92456	0.823337	0.829516	0.604736	0.630597	0.567018			528.6	0.785029	0.819896	0.802241	0.677467	0.670607	0.67254	0.757523	0.755348	0.749711	0.668228	0.633813	0.651345			57.2	0.0181	0.013	0.0026	0.0376	0.0437	0.0117	0.0986	0.0611	0.0289	0.1325	0.095	0.1032			57.2	0.0085	0.0011	-0.0011	0.0195
528.8	1.0247	0.872077	0.866989	0.655127	0.64487	0.647696	0.93242	0.830661	0.836772	0.611778	0.638171	0.573813			528.8	0.792813	0.828192	0.810588	0.684957	0.678246	0.680393	0.764796	0.762565	0.756767	0.675859	0.641062	0.658823			57.6	0.0188	0.0137	0.0031	0.0372	0.0443	0.0107	0.0992	0.0611	0.0302	0.1338	0.0952	0.1043			57.6	0.0078	0.0017	-0.0013	0.0192
529	1.02937	0.876486	0.871166	0.658854	0.648533	0.651608	0.936284	0.834519	0.840272	0.615325	0.641837	0.57725			529	0.796707	0.832327	0.814537	0.688718	0.682002	0.684031	0.768184	0.766229	0.760206	0.679564	0.644606	0.662555			58	0.0181	0.0131	0.0026	0.0374	0.045	0.0122	0.0975	0.0627	0.0301	0.1351	0.0962	0.1058			58	0.009	0.0019	-0.002	0.0209
529.2	1.03867	0.885431	0.879671	0.666178	0.656155	0.659158	0.94405	0.841954	0.84758	0.622195	0.649385	0.584257			529.2	0.804104	0.840507	0.822718	0.696357	0.68958	0.691399	0.775003	0.773398	0.767377	0.686916	0.651733	0.670118			58.4	0.019	0.0138	0.0024	0.038	0.0452	0.0114	0.0991	0.0628	0.0311	0.1355	0.0969	0.1061			58.4	0.008	0	-0.0012	0.0197
529.4	1.04356	0.889686	0.883822	0.6698	0.659953	0.662841	0.94771	0.845609	0.851127	0.625781	0.653292	0.587711			529.4	0.807961	0.844666	0.826853	0.700011	0.693123	0.69512	0.778401	0.77695	0.770864	0.69067	0.655226	0.673903			58.8	0.0184	0.0139	0.0035	0.0383	0.045	0.0119	0.0995	0.0641	0.031	0.1348	0.0972	0.1075			58.8	0.0082	0.0012	-0.0016	0.0208
529.6	1.05295	0.898169	0.892273	0.677318	0.667508	0.670319	0.955573	0.852638	0.857966	0.633061	0.660824	0.59449			529.6	0.815635	0.852968	0.83481	0.707466	0.700616	0.702722	0.785102	0.783819	0.777962	0.698191	0.662375	0.681361			59.2	0.0193	0.0133	0.0029	0.0386	0.0466	0.0125	0.0995	0.0641	0.0327	0.135	0.097	0.1074			59.2	0.0088	0.0012	-0.0004	0.0198
529.8	1.05774	0.902385	0.896551	0.681008	0.671084	0.674	0.959622	0.856198	0.861555	0.636434	0.664649	0.597834			529.8	0.819372	0.857102	0.838664	0.711064	0.704328	0.706399	0.788414	0.787123	0.781563	0.702118	0.666048	0.684972			59.6	0.0192	0.0137	0.0041	0.0386	0.0462	0.0114	0.0997	0.0653	0.0323	0.1356	0.0983	0.1074			59.6	0.0088	0.0007	-0.0012	0.02
530	1.06678	0.910949	0.905015	0.688231	0.678243	0.681437	0.967553	0.863289	0.868638	0.643246	0.672145	0.604436			530	0.826966	0.865278	0.846614	0.718658	0.711754	0.713835	0.79495	0.79386	0.788451	0.709631	0.673426	0.692214			60	0.0194	0.0148	0.0035	0.0389	0.047	0.0122	0.1001	0.0656	0.0328	0.1359	0.0979	0.1079			60	0.0087	0.0013	-0.0008	0.0211
530.2	1.07268	0.916457	0.910485	0.693035	0.683255	0.686489	0.97241	0.867991	0.873214	0.647996	0.677192	0.608971			530.2	0.83203	0.870824	0.851958	0.723479	0.716615	0.718773	0.799202	0.798534	0.79278	0.714176	0.678019	0.697217			60.4	0.0193	0.0148	0.0026	0.0391	0.0482	0.0125	0.1002	0.0667	0.0342	0.1356	0.0983	0.1087			60.4	0.0083	0.001	-0.001	0.0215
530.4	1.08009	0.92316	0.917178	0.699053	0.6895	0.692648	0.978477	0.873803	0.878935	0.653863	0.683327	0.614603			530.4	0.838139	0.877779	0.858699	0.729485	0.722824	0.724719	0.804493	0.804056	0.79838	0.720003	0.683429	0.703303			60.8	0.0195	0.0146	0.0034	0.0398	0.0481	0.0132	0.099	0.0673	0.0337	0.136	0.0991	0.1098			60.8	0.0089	0.0014	-0.0013	0.0209
530.6	1.08611	0.928559	0.922697	0.703956	0.694264	0.697552	0.983489	0.878366	0.883426	0.658545	0.688298	0.619051			530.6	0.843132	0.883084	0.863782	0.734416	0.727515	0.729478	0.808786	0.808453	0.802737	0.724878	0.687931	0.708085			61.2	0.0198	0.0141	0.003	0.0397	0.0478	0.0127	0.1012	0.0673	0.0336	0.1365	0.0986	0.1095			61.2	0.0088	0.0005	-0.0005	0.0212
530.8	1.09382	0.935436	0.929643	0.710013	0.700332	0.703579	0.989543	0.884167	0.889104	0.664303	0.694451	0.624585			530.8	0.84934	0.889491	0.870211	0.740299	0.733428	0.735458	0.814002	0.813715	0.808222	0.73098	0.693821	0.71417			61.6	0.0202	0.0152	0.0029	0.0397	0.0496	0.013	0.1007	0.069	0.0339	0.1374	0.0996	0.112			61.6	0.0089	0.0011	-0.0002	0.0217
531	1.09993	0.940687	0.935091	0.714848	0.705178	0.708371	0.994439	0.888801	0.893522	0.668753	0.699192	0.628934			531	0.854255	0.894906	0.875512	0.74498	0.73802	0.74012	0.818229	0.817979	0.812689	0.735971	0.698489	0.718826			62	0.0193	0.0146	0.0033	0.0398	0.0504	0.0123	0.1019	0.0684	0.0343	0.1366	0.0993	0.1105			62	0.0088	0.0012	-0.0013	0.0215
531.2	1.10735	0.94716	0.941807	0.721101	0.711451	0.714344	1.00043	0.894552	0.899209	0.674334	0.705231	0.634449			531.2	0.860379	0.901643	0.881802	0.751005	0.743972	0.745842	0.823481	0.823414	0.818253	0.741992	0.704259	0.724746			62.4	0.0199	0.0148	0.0035	0.0405	0.0496	0.0132	0.1008	0.0693	0.0351	0.1373	0.1002	0.1127			62.4	0.0094	0.0014	-0.0002	0.0224
531.4	1.11312	0.952365	0.947141	0.725746	0.716286	0.719188	1.00544	0.899046	0.903524	0.678817	0.710141	0.638844			531.4	0.865153	0.90675	0.886798	0.755734	0.748803	0.750721	0.827709	0.827733	0.822454	0.746871	0.708627	0.729367			62.8	0.0197	0.0155	0.0037	0.0402	0.05	0.0132	0.1014	0.0701	0.0356	0.1376	0.1005	0.1128			62.8	0.009	0.002	-0.0013	0.022
531.6	1.12026	0.959023	0.953618	0.731573	0.722247	0.725203	1.01145	0.904296	0.908764	0.684366	0.716283	0.644453			531.6	0.871149	0.913237	0.89314	0.761563	0.754656	0.756625	0.832902	0.833116	0.827743	0.752792	0.714108	0.735005			63.2	0.0201	0.015	0.0031	0.0407	0.0504	0.0139	0.1018	0.0708	0.0367	0.1381	0.1019	0.113			63.2	0.0099	0.0016	-0.0014	0.0219
531.8	1.12884	0.966837	0.961375	0.738484	0.729419	0.732141	1.01818	0.910769	0.915122	0.690814	0.723468	0.65087			531.8	0.878002	0.920936	0.900451	0.768281	0.761482	0.763575	0.838852	0.839499	0.834003	0.759509	0.720679	0.741946			63.6	0.0201	0.0156	0.0041	0.0409	0.0517	0.0136	0.1017	0.0723	0.0356	0.1366	0.1015	0.1143			63.6	0.0093	0.0013	-0.0009	0.0219
532	1.13302	0.970865	0.965169	0.742148	0.732816	0.735585	1.02157	0.913666	0.918145	0.694005	0.726966	0.653974			532	0.881627	0.924692	0.904244	0.771815	0.764763	0.766941	0.84212	0.842509	0.837119	0.762866	0.723843	0.745237			64	0.0208	0.0157	0.0042	0.0417	0.0518	0.0138	0.1024	0.0718	0.0372	0.138	0.1026	0.1144			64	0.0092	0.0014	-0.0009	0.0224
532.2	1.14136	0.978609	0.972905	0.749337	0.739963	0.74241	1.02813	0.91988	0.9243	0.70096	0.734066	0.660443			532.2	0.888689	0.932101	0.911384	0.778879	0.771302	0.773665	0.847963	0.848768	0.843119	0.769766	0.730323	0.752012			64.4	0.0206	0.0154	0.0041	0.0414	0.0535	0.0138	0.1023	0.0724	0.0366	0.1386	0.1012	0.1151			64.4	0.0089	0.0015	-0.0008	0.0231
532.4	1.14555	0.982479	0.976675	0.752905	0.743682	0.745836	1.03127	0.922846	0.92752	0.704168	0.737683	0.663782			532.4	0.892264	0.93566	0.915034	0.782239	0.774772	0.777187	0.85101	0.851729	0.846167	0.773124	0.733577	0.755348			64.8	0.0203	0.0155	0.0045	0.0414	0.0532	0.0134	0.1023	0.073	0.0387	0.1391	0.1012	0.115			64.8	0.0101	0.0026	-0.0007	0.0226
532.6	1.1538	0.989754	0.984393	0.759872	0.750615	0.752604	1.03773	0.928674	0.933413	0.710888	0.744557	0.669922			532.6	0.899247	0.94306	0.921872	0.788569	0.781602	0.783846	0.856768	0.857767	0.852065	0.779791	0.740085	0.761962			65.2	0.0207	0.0162	0.004	0.0422	0.0547	0.0139	0.1029	0.0735	0.0386	0.1386	0.1028	0.1158			65.2	0.0095	0.002	-0.0006	0.0228
532.8	1.15782	0.993367	0.988058	0.763354	0.753974	0.755957	1.04103	0.931659	0.936388	0.714056	0.747977	0.672949			532.8	0.9025	0.946738	0.9254	0.791994	0.784927	0.787145	0.859578	0.860801	0.854877	0.783163	0.743208	0.765329			65.6	0.021	0.0166	0.0041	0.0424	0.0544	0.0145	0.1024	0.0742	0.0389	0.1392	0.1035	0.1161			65.6	0.0111	0.0019	-0.0013	0.023
533	1.16577	1.00064	0.994926	0.770021	0.760558	0.762893	1.04741	0.937267	0.941954	0.720502	0.754926	0.67894			533	0.90884	0.953801	0.932186	0.798403	0.791332	0.793584	0.865034	0.866551	0.86027	0.789781	0.74948	0.771765			66	0.0207	0.016	0.0037	0.0431	0.0548	0.0147	0.1029	0.0755	0.0388	0.1392	0.1035	0.1179			66	0.0098	0.0019	-0.0011	0.0233
533.2	1.16968	1.00442	0.998463	0.773224	0.764123	0.766136	1.05012	0.940141	0.944731	0.723892	0.758316	0.682059			533.2	0.91221	0.957274	0.935786	0.801799	0.794424	0.796792	0.867799	0.869456	0.862901	0.7927	0.752566	0.774972			66.4	0.0217	0.0166	0.0036	0.0424	0.0545	0.0136	0.103	0.0757	0.0394	0.1405	0.1037	0.1176			66.4	0.0102	0.0026	-0.0009	0.024
533.4	1.17752	1.01157	1.00552	0.779799	0.771115	0.77276	1.05594	0.94566	0.950098	0.730393	0.765199	0.688187			533.4	0.91855	0.964209	0.942553	0.808045	0.800879	0.803176	0.873452	0.87528	0.868283	0.799149	0.758847	0.781103			66.8	0.0208	0.0166	0.0043	0.0433	0.0548	0.0145	0.1044	0.0767	0.0397	0.1398	0.1032	0.1181			66.8	0.0107	0.0021	0.0003	0.023
533.6	1.18153	1.01492	1.00902	0.783146	0.774528	0.775919	1.05902	0.948413	0.952945	0.733404	0.768653	0.691151			533.6	0.92176	0.967677	0.945773	0.811114	0.804138	0.806167	0.876056	0.878056	0.871033	0.802407	0.761977	0.784167			67.2	0.0219	0.0155	0.0045	0.0434	0.0563	0.0145	0.1039	0.076	0.0408	0.1404	0.1033	0.1179			67.2	0.01	0.0023	-0.0004	0.0245
533.8	1.18923	1.02208	1.01579	0.78985	0.781061	0.782595	1.06492	0.95378	0.958347	0.739697	0.775046	0.696927			533.8	0.928009	0.974033	0.95208	0.817398	0.810294	0.812437	0.881278	0.88355	0.876346	0.808909	0.768196	0.789856			67.6	0.0213	0.0175	0.0039	0.0436	0.0559	0.0138	0.1035	0.0774	0.0401	0.1412	0.1034	0.1183			67.6	0.0102	0.002	-0.0009	0.0242
534	1.19429	1.02655	1.02031	0.794203	0.785545	0.786936	1.0686	0.957268	0.961706	0.743854	0.779503	0.700924			534	0.932159	0.978491	0.95635	0.82134	0.814523	0.816464	0.884682	0.886996	0.879947	0.813077	0.772425	0.793942			68	0.0224	0.0175	0.0046	0.0443	0.0573	0.0158	0.1037	0.0777	0.0412	0.1412	0.1041	0.1195			68	0.0112	0.0026	-0.0008	0.0241
534.2	1.2003	1.03234	1.02588	0.799465	0.790974	0.792262	1.07348	0.961555	0.965886	0.749031	0.784785	0.705801			534.2	0.93729	0.983931	0.961654	0.826258	0.819647	0.821204	0.889035	0.891485	0.884352	0.818023	0.777385	0.798893			68.4	0.0221	0.0179	0.0042	0.0447	0.0579	0.0151	0.1041	0.079	0.0411	0.1405	0.1052	0.1197			68.4	0.0103	0.0033	-0.0005	0.025
534.4	1.20492	1.037	1.03028	0.803684	0.795471	0.796631	1.07707	0.965005	0.969306	0.753022	0.789143	0.709646			534.4	0.941192	0.988197	0.965644	0.830246	0.823946	0.825208	0.892294	0.89501	0.887731	0.821952	0.781146	0.802896			68.8	0.0214	0.0178	0.0044	0.044	0.0592	0.0161	0.1044	0.0791	0.0428	0.1404	0.1054	0.1205			68.8	0.011	0.002	-0.0004	0.0253
534.6	1.21057	1.04249	1.0358	0.808693	0.800544	0.801931	1.08172	0.96913	0.973285	0.757895	0.79449	0.714456			534.6	0.945876	0.993571	0.970692	0.835188	0.828952	0.830302	0.896307	0.899379	0.891894	0.826908	0.786022	0.807772			69.2	0.0221	0.0175	0.0051	0.0451	0.0581	0.015	0.1044	0.0791	0.0421	0.1415	0.1057	0.1196			69.2	0.011	0.0027	-0.0003	0.0242
534.8	1.21516	1.0469	1.03987	0.812832	0.804717	0.806008	1.08509	0.972187	0.976551	0.762052	0.798722	0.718167			534.8	0.949632	0.997773	0.97472	0.839063	0.832711	0.83412	0.899532	0.902531	0.894909	0.830847	0.789756	0.811725			69.6	0.0219	0.0167	0.005	0.0444	0.0596	0.0154	0.1048	0.0802	0.0436	0.1415	0.1052	0.1204			69.6	0.0102	0.0026	0	0.0253
535	1.22084	1.05238	1.0451	0.817877	0.810016	0.811165	1.08928	0.976332	0.980651	0.767169	0.803839	0.722713			535	0.954299	1.00275	0.979673	0.843821	0.837488	0.838905	0.903456	0.906624	0.898888	0.835569	0.794251	0.816717			70	0.0224	0.018	0.005	0.0458	0.0595	0.0155	0.1046	0.0806	0.0434	0.1411	0.1053	0.1216			70	0.0113	0.0027	-0.0005	0.026
535.2	1.22526	1.05656	1.04929	0.822025	0.81397	0.815197	1.09264	0.979481	0.983829	0.771037	0.807817	0.726542			535.2	0.957987	1.00693	0.983508	0.847639	0.841389	0.842712	0.906503	0.909856	0.901958	0.839257	0.79788	0.82042			70.4	0.0224	0.0178	0.0044	0.0459	0.0605	0.0155	0.1046	0.0806	0.045	0.142	0.1055	0.1209			70.4	0.0118	0.0028	-0.0007	0.0251
535.4	1.2309	1.06137	1.0546	0.82702	0.819071	0.820533	1.0968	0.983647	0.987933	0.775842	0.812935	0.731257			535.4	0.962355	1.01202	0.988152	0.85219	0.846124	0.847503	0.91014	0.913826	0.90603	0.843944	0.802469	0.825204			70.8	0.0233	0.0186	0.0053	0.0463	0.0601	0.0163	0.1045	0.0808	0.0444	0.1415	0.1056	0.1227			70.8	0.0116	0.0025	-0.0002	0.026
535.6	1.23754	1.06714	1.0606	0.833052	0.824904	0.82639	1.10191	0.988277	0.992455	0.78121	0.818808	0.736612			535.6	0.967628	1.01787	0.993892	0.857434	0.851824	0.853041	0.914552	0.918517	0.91069	0.849154	0.807817	0.83051			71.2	0.0228	0.0186	0.005	0.0462	0.0612	0.0163	0.1049	0.0829	0.0454	0.1419	0.107	0.1221			71.2	0.012	0.0016	-0.0007	0.0257
535.8	1.24082	1.07001	1.06343	0.835867	0.827676	0.829205	1.10433	0.99052	0.9946	0.784142	0.821744	0.739018			535.8	0.970048	1.02084	0.996699	0.859951	0.854498	0.855805	0.916625	0.920933	0.91294	0.851752	0.810434	0.83319			71.6	0.0233	0.0187	0.0048	0.0463	0.0616	0.0152	0.1045	0.0833	0.0454	0.1413	0.1064	0.1221			71.6	0.0114	0.0029	0.0002	0.0271
536	1.24724	1.07581	1.06887	0.84175	0.833522	0.835045	1.10915	0.995031	0.999171	0.789708	0.827646	0.744313			536	0.97479	1.02649	1.00239	0.865416	0.859855	0.861278	0.920806	0.925439	0.91715	0.857065	0.815618	0.838553			72	0.0225	0.0192	0.0053	0.0466	0.0619	0.0161	0.1048	0.0833	0.0466	0.1419	0.106	0.1221			72	0.0117	0.0023	-0.0008	0.0273
536.2	1.25025	1.07875	1.07158	0.844598	0.836501	0.838003	1.11163	0.997195	1.00123	0.792518	0.830586	0.746954			536.2	0.977281	1.02921	1.00489	0.868046	0.862668	0.863938	0.923098	0.927542	0.919442	0.859702	0.818097	0.840986			72.4	0.0232	0.0193	0.0055	0.0471	0.0632	0.0155	0.1055	0.0837	0.047	0.1426	0.1068	0.1236			72.4	0.012	0.0034	-0.0008	0.0257
536.4	1.25657	1.08433	1.07754	0.849944	0.84234	0.843618	1.11619	1.0019	1.00559	0.797883	0.836193	0.752148			536.4	0.982482	1.03463	1.01034	0.873281	0.867694	0.869298	0.927464	0.932084	0.923953	0.864854	0.823036	0.84639			72.8	0.0229	0.0196	0.0053	0.0471	0.0635	0.016	0.105	0.0844	0.0467	0.1423	0.1069	0.1239			72.8	0.0119	0.0025	0	0.0263
536.6	1.25949	1.08713	1.0803	0.852719	0.845051	0.846515	1.1186	1.00397	1.00755	0.800504	0.838885	0.75464			536.6	0.984783	1.03729	1.01283	0.875778	0.870147	0.871907	0.929647	0.934292	0.92608	0.867657	0.825481	0.848946			73.2	0.0237	0.0202	0.0052	0.0483	0.0633	0.0171	0.1052	0.0848	0.0469	0.1419	0.1068	0.124			73.2	0.0121	0.003	-0.0003	0.0272
536.8	1.26544	1.09264	1.08561	0.85801	0.850528	0.852069	1.12315	1.0082	1.01159	0.805776	0.844057	0.75946			536.8	0.989434	1.04278	1.01799	0.880469	0.875081	0.876741	0.933424	0.938495	0.930115	0.872388	0.830482	0.853928			73.6	0.0235	0.019	0.0052	0.0476	0.064	0.017	0.1051	0.0846	0.0484	0.1425	0.1071	0.1249			73.6	0.0129	0.0031	-0.0002	0.0273
537	1.26819	1.09566	1.08829	0.860603	0.853198	0.854715	1.12537	1.01014	1.01351	0.80845	0.846739	0.761861			537	0.991742	1.04529	1.0205	0.882927	0.877626	0.879268	0.935397	0.940423	0.932028	0.874741	0.832947	0.856202			74	0.024	0.0195	0.0054	0.0474	0.0652	0.0164	0.1055	0.0857	0.0487	0.1428	0.1081	0.1243			74	0.0122	0.0031	0	0.0279
537.2	1.27372	1.1011	1.09358	0.865779	0.858642	0.860075	1.12957	1.01417	1.01744	0.813448	0.852128	0.766796			537.2	0.996425	1.0504	1.0257	0.887734	0.882655	0.88402	0.939244	0.944581	0.935766	0.879624	0.837513	0.861179			74.4	0.0237	0.0199	0.005	0.0477	0.0648	0.017	0.1058	0.0869	0.0485	0.1433	0.1071	0.1251			74.4	0.0124	0.0031	0.0012	0.0282
537.4	1.27741	1.10446	1.09693	0.869159	0.862076	0.863557	1.13208	1.01684	1.02002	0.816867	0.855604	0.770018			537.4	0.999423	1.05371	1.02889	0.890755	0.88588	0.887178	0.941791	0.947357	0.938169	0.882654	0.840502	0.864352			74.8	0.0234	0.0199	0.0064	0.0478	0.0651	0.0167	0.1063	0.0871	0.0496	0.1423	0.1072	0.1246			74.8	0.0119	0.0029	0.0004	0.0279
537.6	1.28206	1.10849	1.10105	0.873292	0.866474	0.867897	1.13498	1.02002	1.02306	0.821163	0.860036	0.774194			537.6	1.00309	1.05805	1.0327	0.894738	0.890003	0.891349	0.944931	0.950694	0.941131	0.886713	0.844295	0.868084			75.2	0.024	0.02	0.0053	0.049	0.0661	0.0174	0.1065	0.0883	0.0507	0.1439	0.1074	0.1253			75.2	0.0125	0.0031	0.0003	0.0286
537.8	1.28563	1.11167	1.10425	0.876559	0.869705	0.871265	1.1376	1.02232	1.02531	0.824438	0.863325	0.777179			537.8	1.00589	1.06108	1.03599	0.897711	0.892899	0.894322	0.947312	0.953278	0.943673	0.889668	0.847205	0.87117			75.6	0.0244	0.0205	0.0061	0.0491	0.0662	0.0169	0.1059	0.0881	0.0508	0.1432	0.1084	0.1263			75.6	0.0128	0.0032	0.0005	0.0277
538	1.29016	1.11575	1.10811	0.880547	0.874019	0.87542	1.14093	1.02521	1.02839	0.828724	0.86757	0.780922			538	1.00965	1.06484	1.04005	0.901309	0.896486	0.898007	0.950106	0.95643	0.946615	0.893326	0.850806	0.874968			76	0.025	0.0208	0.0052	0.05	0.0672	0.0173	0.1056	0.0887	0.0516	0.1427	0.1081	0.1257			76	0.0131	0.004	0.0002	0.0283
538.2	1.29353	1.11891	1.1114	0.883867	0.877226	0.878601	1.14361	1.02754	1.03074	0.831797	0.870792	0.783966			538.2	1.01233	1.06789	1.0429	0.90409	0.899719	0.9008	0.952462	0.958941	0.948881	0.896092	0.853648	0.877978			76.4	0.0251	0.0206	0.0054	0.0499	0.0684	0.0184	0.1064	0.0894	0.0511	0.1438	0.1078	0.1264			76.4	0.0125	0.0033	0.0005	0.0284
538.4	1.29778	1.12273	1.11522	0.887882	0.881189	0.882469	1.14663	1.0303	1.03355	0.835612	0.874987	0.787723			538.4	1.01574	1.0717	1.04634	0.907568	0.903676	0.904221	0.95522	0.962053	0.951676	0.899912	0.857272	0.881503			76.8	0.0253	0.0204	0.0061	0.0498	0.0681	0.0168	0.1068	0.0895	0.0525	0.1439	0.108	0.1269			76.8	0.013	0.0038	-0.0004	0.0281
538.6	1.30109	1.12577	1.11817	0.890966	0.884486	0.885794	1.14903	1.03275	1.03555	0.838697	0.878254	0.790531			538.6	1.01842	1.07441	1.04914	0.910343	0.906658	0.907106	0.957425	0.964337	0.953772	0.902808	0.85998	0.884174			77.2	0.0242	0.0203	0.0051	0.0501	0.0687	0.0176	0.1069	0.0901	0.053	0.1441	0.1087	0.1267			77.2	0.013	0.0036	0	0.0299
538.8	1.30526	1.12983	1.12178	0.894743	0.888311	0.889737	1.15181	1.03546	1.03789	0.842522	0.882203	0.79411			538.8	1.0218	1.07786	1.05273	0.914056	0.910201	0.9108	0.960169	0.967134	0.956219	0.906221	0.8633	0.887478			77.6	0.0251	0.0211	0.0064	0.0501	0.0684	0.0178	0.1064	0.091	0.0535	0.1444	0.1084	0.1265			77.6	0.0136	0.0033	0.0001	0.0293
539	1.30981	1.13451	1.12607	0.89887	0.892917	0.894383	1.1551	1.03862	1.04099	0.847215	0.886729	0.798376			539	1.02542	1.08201	1.05662	0.918145	0.914088	0.914733	0.962899	0.970494	0.959086	0.910466	0.867076	0.891584			78	0.0247	0.0208	0.0063	0.0497	0.0696	0.0185	0.1071	0.0914	0.0539	0.1444	0.1085	0.1269			78	0.0134	0.004	0.0007	0.0288
539.2	1.31201	1.1367	1.1282	0.900968	0.895246	0.896607	1.15683	1.04004	1.04252	0.849329	0.889007	0.80054			539.2	1.02716	1.08409	1.05859	0.920207	0.916205	0.916789	0.964484	0.972042	0.960475	0.912652	0.869224	0.893608			78.4	0.0259	0.0216	0.0064	0.0507	0.0707	0.0184	0.1066	0.0908	0.0548	0.142	0.109	0.1277			78.4	0.0139	0.0034	0.0007	0.0299
539.4	1.31642	1.14101	1.1324	0.905142	0.899836	0.900861	1.15993	1.04302	1.04521	0.853475	0.893443	0.804607			539.4	1.03123	1.08806	1.06257	0.923928	0.9202	0.920609	0.967494	0.975387	0.963476	0.916817	0.87294	0.897547			78.8	0.0251	0.0216	0.0058	0.0512	0.0702	0.0184	0.1082	0.0915	0.0546	0.1457	0.1091	0.1281			78.8	0.0136	0.0033	0.0008	0.0293
539.6	1.31838	1.14292	1.13432	0.90722	0.90199	0.903051	1.16111	1.04449	1.04657	0.855563	0.895545	0.80647			539.6	1.03319	1.09006	1.06468	0.925727	0.922045	0.922653	0.968825	0.97698	0.9648	0.918582	0.87494	0.899371			79.2	0.0249	0.0214	0.0063	0.0504	0.0708	0.0183	0.1083	0.0925	0.0548	0.1443	0.1092	0.1288			79.2	0.0133	0.0033	0.0009	0.0298
539.8	1.32233	1.14695	1.13801	0.91133	0.906038	0.907423	1.16365	1.04676	1.04923	0.859761	0.899829	0.810379			539.8	1.0368	1.09406	1.06835	0.929254	0.926054	0.926342	0.971532	0.979865	0.967785	0.92216	0.87881	0.90313			79.6	0.026	0.0223	0.0066	0.0515	0.0717	0.0186	0.1079	0.0927	0.0549	0.1461	0.1089	0.128			79.6	0.0138	0.0033	0	0.0294
540	1.32436	1.14871	1.13991	0.913344	0.908082	0.909558	1.16491	1.04817	1.05069	0.861934	0.901801	0.812267			540	1.03852	1.09603	1.07015	0.930956	0.928278	0.928216	0.972851	0.981399	0.969128	0.923912	0.880672	0.904799			80	0.0252	0.0215	0.0067	0.0518	0.0713	0.0186	0.1072	0.0934	0.0561	0.1445	0.1089	0.1288			80	0.0143	0.0029	0.0008	0.0295
540.2	1.32852	1.15223	1.14369	0.917584	0.91235	0.913433	1.16743	1.05061	1.05323	0.865931	0.906327	0.816553			540.2	1.04204	1.09972	1.07351	0.934614	0.932057	0.93223	0.975527	0.984103	0.971737	0.927564	0.883713	0.908278			80.4	0.0259	0.0224	0.0062	0.0523	0.0726	0.019	0.1078	0.0936	0.0571	0.146	0.1088	0.129			80.4	0.0152	0.0043	0.001	0.0299
540.4	1.33119	1.15461	1.14633	0.920228	0.91502	0.91604	1.16906	1.05214	1.05498	0.868598	0.908947	0.819092			540.4	1.04428	1.10206	1.07568	0.936825	0.934477	0.934769	0.97742	0.985996	0.973375	0.929906	0.886122	0.910788			80.8	0.0258	0.0224	0.0066	0.0519	0.073	0.0197	0.1066	0.0944	0.0577	0.1434	0.1092	0.1296			80.8	0.0154	0.0043	0.0011	0.0299
540.6	1.33422	1.15758	1.14935	0.923464	0.918247	0.919292	1.17103	1.05398	1.05688	0.871963	0.912359	0.822227			540.6	1.04683	1.10497	1.07853	0.939743	0.937332	0.937769	0.979637	0.988306	0.975667	0.932766	0.889154	0.913633			81.2	0.0261	0.0226	0.0067	0.0519	0.0738	0.019	0.1075	0.0944	0.0573	0.1463	0.1105	0.1292			81.2	0.0139	0.0037	0.0016	0.0306
540.8	1.33657	1.16015	1.1516	0.925898	0.92089	0.921851	1.17276	1.05537	1.05849	0.874296	0.915069	0.824502			540.8	1.04879	1.10732	1.08081	0.94209	0.939481	0.940257	0.98117	0.989848	0.977197	0.935057	0.891211	0.91582			81.6	0.0253	0.0226	0.0061	0.0525	0.0731	0.0192	0.1077	0.0949	0.0579	0.1447	0.1097	0.1297			81.6	0.0148	0.004	0.0007	0.0308
541	1.33945	1.16327	1.15448	0.929048	0.924105	0.92493	1.17485	1.05735	1.06044	0.877209	0.918455	0.827417			541	1.05138	1.10994	1.08369	0.944828	0.942144	0.942961	0.982893	0.991876	0.979216	0.937777	0.893867	0.918703			82	0.0261	0.0218	0.007	0.0527	0.0752	0.0193	0.1088	0.0959	0.0575	0.145	0.1107	0.1292			82	0.0148	0.0034	0.0009	0.0311
541.2	1.3419	1.16562	1.1567	0.931342	0.92668	0.927367	1.17624	1.05879	1.06194	0.879628	0.920992	0.829834			541.2	1.05339	1.11211	1.08581	0.946974	0.944359	0.945274	0.984457	0.993567	0.980555	0.939869	0.896118	0.920601			82.4	0.0268	0.0224	0.0069	0.0533	0.0748	0.0199	0.1078	0.0965	0.0592	0.1452	0.1086	0.1295			82.4	0.0146	0.0045	0.0007	0.0308
541.4	1.34505	1.16841	1.15949	0.934306	0.929783	0.930418	1.17807	1.06057	1.06334	0.882398	0.923965	0.832857			541.4	1.05588	1.11485	1.08832	0.949578	0.947264	0.948107	0.986363	0.995506	0.982432	0.94261	0.898735	0.922975			82.8	0.0273	0.0233	0.0066	0.0533	0.0747	0.019	0.1078	0.0964	0.0604	0.1451	0.1099	0.1296			82.8	0.0142	0.0053	0.0012	0.0308
541.6	1.34733	1.1706	1.16166	0.936606	0.932199	0.932909	1.17915	1.06211	1.06462	0.884736	0.926309	0.834992			541.6	1.05794	1.11681	1.09052	0.951813	0.949232	0.950326	0.987745	0.997098	0.983998	0.944432	0.900812	0.924855			83.2	0.0266	0.023	0.0066	0.054	0.0764	0.0197	0.1074	0.0965	0.0597	0.1451	0.1094	0.1303			83.2	0.0149	0.0044	0.0012	0.0315
541.8	1.34993	1.17326	1.16426	0.939586	0.935249	0.936019	1.18085	1.06386	1.06607	0.887593	0.929378	0.83768			541.8	1.06035	1.1194	1.09326	0.954545	0.951692	0.953096	0.989534	0.998786	0.985824	0.946435	0.90332	0.927338			83.6	0.0278	0.0237	0.0069	0.0533	0.0759	0.0198	0.108	0.0967	0.0605	0.1451	0.1104	0.1307			83.6	0.0148	0.0044	0.0016	0.0323
542	1.35282	1.1761	1.16707	0.942809	0.938719	0.939309	1.1826	1.06563	1.06827	0.891006	0.9328	0.841098			542	1.06289	1.12267	1.09609	0.957701	0.954517	0.955994	0.99134	1.0011	0.988029	0.949455	0.906548	0.930644			84	0.0269	0.0241	0.0066	0.0545	0.0765	0.0196	0.1073	0.0967	0.0606	0.1451	0.1101	0.13			84	0.0152	0.005	0.0014	0.0322
542.2	1.35426	1.17759	1.16846	0.944256	0.940608	0.940928	1.18361	1.0664	1.06939	0.892733	0.934286	0.842843			542.2	1.06421	1.12407	1.09738	0.958753	0.955964	0.957244	0.992208	1.00221	0.989015	0.95096	0.907932	0.932127			84.4	0.027	0.0239	0.0072	0.0541	0.0777	0.0206	0.1088	0.0978	0.0615	0.1468	0.1102	0.1306			84.4	0.0145	0.0043	0.0009	0.0323
542.4	1.35757	1.18039	1.17107	0.947617	0.943771	0.944411	1.18529	1.06768	1.07111	0.896051	0.937982	0.845871			542.4	1.06681	1.127	1.10013	0.96149	0.959126	0.960498	0.994417	1.00396	0.991001	0.95346	0.910771	0.934746			84.8	0.0266	0.0235	0.0083	0.054	0.0778	0.0205	0.1081	0.0976	0.062	0.1456	0.1112	0.1312			84.8	0.0155	0.0049	0.0008	0.0321
542.6	1.35889	1.18169	1.17254	0.949255	0.945291	0.945983	1.186	1.06851	1.07166	0.897697	0.939694	0.847447			542.6	1.06821	1.12841	1.10131	0.962548	0.960434	0.961999	0.995388	1.005	0.991964	0.954545	0.91193	0.935924			85.2	0.0275	0.0239	0.0073	0.0549	0.0776	0.0208	0.108	0.0994	0.0624	0.1465	0.1103	0.1316			85.2	0.0149	0.0046	0.0011	0.0321
542.8	1.36129	1.18468	1.17529	0.952183	0.948396	0.949031	1.18742	1.06989	1.07321	0.900642	0.942849	0.85031			542.8	1.0706	1.13104	1.10351	0.965203	0.963081	0.964699	0.997059	1.00672	0.993655	0.956824	0.914633	0.938302			85.6	0.0277	0.0236	0.0067	0.0554	0.0792	0.0205	0.1085	0.0994	0.063	0.1457	0.1109	0.132			85.6	0.0151	0.0048	0.0009	0.0326
543	1.36285	1.18626	1.17676	0.953591	0.949918	0.950451	1.18823	1.0707	1.07402	0.902056	0.944483	0.851867			543	1.07163	1.13228	1.10477	0.966319	0.964534	0.965938	0.997805	1.00768	0.994491	0.958202	0.915992	0.939677			86	0.027	0.0246	0.007	0.055	0.0793	0.021	0.1086	0.0986	0.0637	0.1459	0.111	0.1312			86	0.015	0.0051	0.0014	0.0325
543.2	1.36557	1.1889	1.17941	0.9566	0.953306	0.953314	1.18964	1.07225	1.07533	0.904821	0.947561	0.854839			543.2	1.07337	1.13476	1.10705	0.968725	0.967029	0.9686	0.99936	1.00946	0.99585	0.960738	0.918612	0.9421			86.4	0.0285	0.0243	0.0076	0.055	0.0795	0.0216	0.1088	0.0998	0.0633	0.1455	0.1108	0.1312			86.4	0.0153	0.0045	0.0013	0.0335
543.4	1.36723	1.19075	1.18095	0.958537	0.955294	0.955349	1.19066	1.07291	1.07615	0.906498	0.949559	0.856465			543.4	1.07471	1.13639	1.1085	0.970371	0.968591	0.970242	1.00026	1.01059	0.996817	0.962185	0.920156	0.943787			86.8	0.0271	0.0247	0.0081	0.055	0.0793	0.0215	0.1088	0.0986	0.0643	0.1459	0.1115	0.1328			86.8	0.0157	0.0047	0.0011	0.0339
543.6	1.36909	1.19286	1.18301	0.960902	0.957526	0.957819	1.19171	1.0738	1.0772	0.908656	0.951699	0.858623			543.6	1.07654	1.13805	1.1102	0.972375	0.970336	0.971997	1.00132	1.01191	0.997954	0.96405	0.922146	0.945862			87.2	0.028	0.024	0.008	0.0559	0.0802	0.021	0.1092	0.1008	0.066	0.1456	0.1102	0.132			87.2	0.0162	0.0049	0.0013	0.0336
543.8	1.3704	1.19437	1.18422	0.96283	0.959418	0.95971	1.19254	1.07447	1.07791	0.910288	0.953672	0.860315			543.8	1.0778	1.13957	1.11174	0.974014	0.971834	0.973409	1.00205	1.0128	0.998976	0.9654	0.923461	0.947167			87.6	0.028	0.0249	0.0068	0.0557	0.0809	0.0211	0.1081	0.1	0.0658	0.1461	0.1101	0.1324			87.6	0.016	0.0048	0.0011	0.0338
544	1.37216	1.1963	1.18589	0.964856	0.961807	0.962094	1.19347	1.0754	1.07871	0.912344	0.955862	0.862552			544	1.07944	1.14152	1.11341	0.975786	0.973768	0.975339	1.00277	1.01373	0.999996	0.967217	0.925194	0.948945			88	0.0287	0.0257	0.0072	0.0573	0.0814	0.0215	0.1078	0.1013	0.0664	0.1458	0.1111	0.1313			88	0.0164	0.0053	0.0017	0.0332
544.2	1.37349	1.19768	1.18729	0.966505	0.963536	0.963897	1.19422	1.07606	1.07936	0.914113	0.957542	0.864219			544.2	1.08063	1.14286	1.11459	0.977153	0.975415	0.976698	1.00361	1.01476	1.00098	0.968558	0.92673	0.950188			88.4	0.028	0.0257	0.0075	0.0566	0.0816	0.0221	0.1088	0.1009	0.0666	0.1464	0.1115	0.132			88.4	0.0158	0.0056	0.0012	0.0339
544.4	1.37516	1.19943	1.18892	0.968536	0.965603	0.966349	1.19502	1.07689	1.08002	0.916305	0.959592	0.86609			544.4	1.08201	1.14468	1.11611	0.97885	0.977352	0.978491	1.00465	1.01584	1.00211	0.969922	0.928435	0.951751			88.8	0.028	0.025	0.0069	0.0571	0.0825	0.022	0.1091	0.1024	0.0668	0.1454	0.1112	0.1325			88.8	0.0166	0.0049	0.0025	0.0344
544.6	1.37627	1.20044	1.19016	0.970191	0.967166	0.968059	1.19529	1.07724	1.08061	0.917846	0.96134	0.867661			544.6	1.08302	1.14584	1.11728	0.980047	0.978539	0.979709	1.00528	1.01632	1.00276	0.971101	0.929495	0.953095			89.2	0.0282	0.0261	0.0071	0.0563	0.083	0.0216	0.1088	0.1021	0.0662	0.1459	0.1115	0.1324			89.2	0.0164	0.0051	0.0014	0.0343
544.8	1.37754	1.20213	1.19142	0.97225	0.969009	0.970059	1.19557	1.07771	1.0813	0.919765	0.96359	0.869281			544.8	1.08407	1.14735	1.11862	0.981687	0.980008	0.981106	1.006	1.01694	1.00337	0.972354	0.930852	0.954694			89.6	0.0287	0.0262	0.0077	0.0569	0.0823	0.022	0.1098	0.1018	0.0676	0.1466	0.1116	0.1335			89.6	0.0162	0.0056	0.002	0.0343
545	1.37925	1.20377	1.19279	0.974424	0.971544	0.97244	1.19605	1.07811	1.08184	0.921793	0.966017	0.871607			545	1.08537	1.14922	1.12023	0.983308	0.981944	0.982648	1.00658	1.01774	1.00423	0.974023	0.932505	0.956507			90	0.0289	0.0264	0.008	0.0575	0.0839	0.0221	0.1089	0.1023	0.0682	0.1453	0.111	0.1328			90	0.0164	0.0053	0.0017	0.0345
545.2	1.38014	1.20462	1.1938	0.975409	0.972633	0.973599	1.19593	1.07835	1.08238	0.922927	0.966965	0.872622			545.2	1.08594	1.15004	1.12087	0.983985	0.982771	0.983455	1.00692	1.01829	1.00441	0.974863	0.933231	0.957125			90.4	0.0287	0.026	0.0084	0.0578	0.0839	0.0223	0.1085	0.1025	0.0692	0.1461	0.1113	0.132			90.4	0.0175	0.0061	0.002	0.0345
545.4	1.38196	1.20662	1.19538	0.977517	0.974783	0.975931	1.19609	1.07888	1.08289	0.924801	0.969256	0.87429			545.4	1.08693	1.15125	1.12216	0.985373	0.984668	0.984958	1.00784	1.01901	1.00507	0.976206	0.934676	0.958345			90.8	0.0291	0.0256	0.0079	0.0577	0.0842	0.0225	0.1086	0.1035	0.0691	0.1449	0.1105	0.1326			90.8	0.0168	0.0054	0.0017	0.035
545.6	1.38253	1.20725	1.19622	0.978639	0.975846	0.976961	1.19602	1.07917	1.08306	0.92559	0.970381	0.87489			545.6	1.08738	1.15211	1.12281	0.986467	0.985586	0.985865	1.00824	1.01939	1.00534	0.976835	0.935344	0.959022			91.2	0.0294	0.0265	0.0082	0.0577	0.0842	0.0226	0.1089	0.1039	0.0704	0.1464	0.1118	0.1335			91.2	0.0169	0.0051	0.0022	0.0355
545.8	1.38329	1.20853	1.19754	0.98057	0.97819	0.97893	1.19609	1.07975	1.08325	0.927011	0.972153	0.876431			545.8	1.08841	1.1535	1.12384	0.988114	0.986972	0.987166	1.00883	1.02004	1.00583	0.978304	0.936853	0.960412			91.6	0.0297	0.0271	0.0086	0.058	0.0856	0.022	0.109	0.1044	0.0699	0.1456	0.1125	0.1339			91.6	0.017	0.0055	0.0025	0.0351
546	1.38403	1.2093	1.1982	0.981967	0.97955	0.980318	1.19596	1.08023	1.08343	0.928113	0.973116	0.877459			546	1.08882	1.15429	1.12466	0.989267	0.987843	0.988014	1.00899	1.02034	1.00616	0.979151	0.937584	0.961111			92	0.0301	0.026	0.0078	0.0587	0.085	0.023	0.1094	0.1036	0.0713	0.1462	0.1114	0.1332			92	0.017	0.005	0.0022	0.0357
546.2	1.38495	1.21017	1.19903	0.983523	0.981067	0.981969	1.19585	1.08045	1.08362	0.929608	0.974666	0.878749			546.2	1.08934	1.15523	1.12574	0.990499	0.989202	0.98912	1.00921	1.02073	1.00668	0.980052	0.9387	0.962092			92.4	0.0301	0.0263	0.0089	0.0586	0.0863	0.0221	0.1095	0.1043	0.0709	0.1476	0.112	0.1334			92.4	0.0174	0.0063	0.0018	0.036
546.4	1.38545	1.21074	1.19955	0.984675	0.982276	0.98319	1.19579	1.08036	1.08383	0.930769	0.975704	0.879644			546.4	1.08997	1.15603	1.12607	0.991559	0.990048	0.989933	1.0092	1.02098	1.00686	0.980776	0.939297	0.962887			92.8	0.0299	0.0266	0.0089	0.0588	0.0859	0.0232	0.1093	0.1042	0.0721	0.1458	0.1112	0.1333			92.8	0.0177	0.0065	0.0019	0.0355
546.6	1.38614	1.2115	1.20034	0.986078	0.983877	0.984648	1.19557	1.08048	1.08396	0.931934	0.977101	0.880821			546.6	1.09082	1.15677	1.12667	0.992704	0.991376	0.990711	1.00929	1.02135	1.00712	0.981767	0.939843	0.963559			93.2	0.0308	0.0268	0.0086	0.0589	0.0873	0.0224	0.1096	0.1053	0.0718	0.1464	0.1113	0.1334			93.2	0.0178	0.0056	0.0019	0.0363
546.8	1.38639	1.21202	1.20096	0.987007	0.985028	0.98573	1.19519	1.08052	1.08382	0.932879	0.978276	0.881845			546.8	1.0913	1.15733	1.12733	0.993322	0.992313	0.991287	1.00956	1.0214	1.00739	0.982391	0.940526	0.964181			93.6	0.0298	0.0277	0.0087	0.0597	0.087	0.023	0.1101	0.1054	0.0727	0.1466	0.112	0.133			93.6	0.0182	0.0054	0.0026	0.0369
547	1.38663	1.21263	1.20149	0.988371	0.986435	0.987057	1.19492	1.08048	1.08368	0.933974	0.979773	0.882871			547	1.09186	1.15814	1.12812	0.994124	0.993581	0.992378	1.00961	1.02162	1.00761	0.982949	0.941084	0.964953			94	0.0301	0.0273	0.0084	0.0597	0.0878	0.0228	0.1094	0.1058	0.0733	0.1477	0.113	0.1337			94	0.0177	0.0057	0.0013	0.0361
547.2	1.38709	1.21289	1.20197	0.989146	0.987299	0.988173	1.19428	1.08058	1.0834	0.934717	0.98059	0.883667			547.2	1.09206	1.15877	1.12835	0.994879	0.99417	0.992958	1.00956	1.02187	1.00761	0.983456	0.941729	0.965616			94.4	0.03	0.0275	0.0093	0.0603	0.0877	0.023	0.1105	0.1053	0.0734	0.1471	0.1122	0.1344			94.4	0.0173	0.0058	0.0018	0.0366
547.4	1.38758	1.21329	1.20238	0.990349	0.988413	0.9894	1.1935	1.08051	1.08329	0.935475	0.981682	0.884521			547.4	1.09225	1.15926	1.12876	0.995841	0.995056	0.993597	1.00973	1.02217	1.00767	0.983792	0.942264	0.966303			94.8	0.0301	0.0279	0.0088	0.059	0.0891	0.0235	0.1092	0.1062	0.0744	0.1472	0.112	0.1341			94.8	0.0181	0.0065	0.0016	0.0372
547.6	1.38799	1.21389	1.20284	0.99154	0.989897	0.990749	1.19266	1.08026	1.08313	0.936349	0.982716	0.88546			547.6	1.09291	1.15997	1.1293	0.996504	0.995823	0.994358	1.00936	1.02219	1.00748	0.984397	0.942428	0.967115			95.2	0.0302	0.0277	0.0088	0.0595	0.0885	0.0234	0.1096	0.1066	0.0749	0.1468	0.1126	0.1346			95.2	0.0182	0.0067	0.0024	0.0366
547.8	1.38808	1.21406	1.20318	0.991995	0.99065	0.991261	1.19243	1.07995	1.08299	0.936727	0.983183	0.885982			547.8	1.09308	1.1602	1.12937	0.996724	0.996193	0.994688	1.00934	1.02212	1.00734	0.984713	0.942771	0.967527			95.6	0.0308	0.0284	0.0093	0.0606	0.0886	0.0243	0.1089	0.1073	0.0752	0.1471	0.1124	0.1341			95.6	0.0186	0.0061	0.0019	0.0363
548	1.38824	1.2147	1.20366	0.993043	0.991998	0.992402	1.192	1.08016	1.08267	0.937623	0.984143	0.886757			548	1.09345	1.16091	1.1296	0.997733	0.997117	0.995558	1.00918	1.02227	1.00717	0.985264	0.943503	0.968073			96	0.031	0.0284	0.0089	0.0609	0.0893	0.0237	0.1098	0.107	0.076	0.1468	0.1127	0.1344			96	0.0184	0.0059	0.0022	0.0376
548.2	1.38815	1.21473	1.20405	0.99351	0.992758	0.993001	1.19147	1.08004	1.08235	0.938194	0.984601	0.887168			548.2	1.09363	1.16096	1.12972	0.998009	0.997487	0.995994	1.00898	1.02244	1.00722	0.985399	0.94383	0.968455			96.4	0.0309	0.0288	0.0089	0.0606	0.0906	0.0243	0.1099	0.1076	0.0769	0.147	0.1124	0.1345			96.4	0.0183	0.006	0.0023	0.0374
548.4	1.38807	1.21521	1.20448	0.994422	0.993937	0.994272	1.19072	1.07929	1.08197	0.938984	0.985701	0.887851			548.4	1.09394	1.16134	1.12996	0.998474	0.997955	0.996739	1.00881	1.02243	1.00718	0.985699	0.944355	0.968648			96.8	0.0306	0.0288	0.0093	0.0617	0.0898	0.0236	0.1097	0.1071	0.0767	0.1465	0.113	0.1349			96.8	0.0175	0.0055	0.0022	0.0387
548.6	1.38799	1.21534	1.20449	0.994886	0.994669	0.995	1.19044	1.07897	1.08153	0.939416	0.986055	0.888296			548.6	1.09427	1.16155	1.13003	0.998933	0.998289	0.997313	1.00849	1.02233	1.00715	0.98605	0.94476	0.969009			97.2	0.0309	0.0286	0.009	0.0614	0.0902	0.0248	0.1104	0.107	0.0774	0.148	0.1116	0.1347			97.2	0.0186	0.0063	0.0027	0.0371
548.8	1.3877	1.21526	1.20467	0.99557	0.995364	0.995617	1.18993	1.07863	1.08095	0.939722	0.986685	0.889022			548.8	1.09471	1.16204	1.13019	0.999369	0.998792	0.997817	1.00812	1.02209	1.00709	0.986134	0.945098	0.969206			97.6	0.0315	0.0287	0.009	0.0612	0.0906	0.0233	0.1099	0.1077	0.0779	0.1476	0.1121	0.1349			97.6	0.0184	0.0071	0.0027	0.038
549	1.38733	1.21521	1.20476	0.996035	0.995914	0.996189	1.18942	1.07832	1.08045	0.940122	0.987384	0.889546			549	1.09464	1.16202	1.13029	0.999327	0.999157	0.998084	1.00767	1.02177	1.00696	0.985997	0.945166	0.969441			98	0.0313	0.0297	0.0095	0.061	0.0923	0.0247	0.1101	0.1076	0.079	0.1471	0.1119	0.1348			98	0.0189	0.0065	0.0028	0.0386
549.2	1.38701	1.2154	1.20494	0.996722	0.996454	0.996761	1.18872	1.07789	1.08006	0.94065	0.988002	0.890038			549.2	1.09468	1.16192	1.13052	0.999289	0.999675	0.998394	1.00692	1.02148	1.0068	0.985877	0.945236	0.969592			98.4	0.0309	0.0296	0.0101	0.0629	0.0916	0.0244	0.1096	0.1092	0.0786	0.1481	0.1126	0.1348			98.4	0.0192	0.0069	0.003	0.0393
549.4	1.38689	1.21532	1.20514	0.99716	0.99688	0.997363	1.18821	1.07724	1.0796	0.940876	0.988519	0.890225			549.4	1.09476	1.16185	1.13055	0.999413	1	0.99873	1.00634	1.02112	1.00645	0.985851	0.945434	0.96983			98.8	0.0317	0.0305	0.0089	0.0615	0.0921	0.0257	0.1098	0.1082	0.0797	0.147	0.113	0.1344			98.8	0.0189	0.0073	0.002	0.039
549.6	1.38666	1.21499	1.2052	0.997751	0.997507	0.998187	1.1875	1.07664	1.07901	0.940938	0.988801	0.890465			549.6	1.09478	1.16186	1.13051	0.999591	0.999959	0.999039	1.00575	1.02084	1.00584	0.985713	0.945284	0.97003			99.2	0.0311	0.0306	0.0093	0.0621	0.0924	0.0249	0.1109	0.1096	0.0792	0.1478	0.1126	0.1359			99.2	0.0191	0.0061	0.0027	0.0385
549.8	1.38628	1.21497	1.20532	0.997997	0.997832	0.998457	1.18675	1.07617	1.0784	0.941081	0.988922	0.890749			549.8	1.09462	1.16189	1.13051	0.999598	0.999935	0.999166	1.00552	1.02045	1.00553	0.985325	0.94519	0.969928			99.6	0.031	0.0297	0.0095	0.0625	0.0929	0.025	0.1101	0.1087	0.0794	0.1473	0.1133	0.1348			99.6	0.0186	0.0067	0.0021	0.0392
550	1.38582	1.2149	1.20508	0.998302	0.998299	0.998774	1.18588	1.07551	1.07787	0.94122	0.989184	0.890903			550	1.0943	1.16194	1.13066	0.999769	0.999933	0.999537	1.00504	1.02004	1.00511	0.984822	0.945155	0.97003			100	0.0324	0.0302	0.0093	0.063	0.0932	0.0249	0.1096	0.1094	0.0803	0.1469	0.1132	0.1355			100	0.0201	0.0071	0.0029	0.0388
550.2	1.38537	1.21432	1.20453	0.998737	0.998851	0.999093	1.1848	1.07477	1.07732	0.941052	0.989377	0.890832			550.2	1.09419	1.16172	1.13036	0.999974	0.999903	1	1.00417	1.01947	1.00446	0.984411	0.945092	0.970015			100.4	0.0329	0.0304	0.0102	0.0627	0.0935	0.025	0.1101	0.1091	0.0808	0.1478	0.1121	0.1357			100.4	0.019	0.0072	0.003	0.0395
550.4	1.38519	1.21431	1.20435	0.998697	0.999004	0.9994	1.18413	1.07447	1.07675	0.940964	0.989439	0.890862			550.4	1.09413	1.16159	1.13014	1	0.999901	0.999759	1.00389	1.01891	1.00418	0.984196	0.945077	0.969983			100.8	0.0324	0.0307	0.0098	0.0639	0.0941	0.026	0.1101	0.1097	0.0823	0.1479	0.1128	0.1345			100.8	0.0198	0.0077	0.0022	0.0392
550.6	1.3845	1.21404	1.20401	0.998965	0.999579	0.999684	1.1833	1.07332	1.07607	0.940786	0.989384	0.890888			550.6	1.09376	1.16112	1.12997	0.999896	0.999995	0.999906	1.00318	1.01806	1.00346	0.983678	0.944672	0.969591			101.2	0.032	0.0302	0.0097	0.0638	0.0944	0.0261	0.1095	0.1092	0.0819	0.1474	0.1123	0.1351			101.2	0.0191	0.0067	0.0033	0.0395
550.8	1.38392	1.21373	1.20393	0.999012	0.999782	0.999712	1.18294	1.07292	1.0755	0.941041	0.989304	0.890653			550.8	1.09367	1.16079	1.12974	0.999821	0.999852	0.999909	1.00267	1.01754	1.0031	0.983619	0.944582	0.969272			101.6	0.0324	0.0298	0.0102	0.0637	0.0961	0.0266	0.1108	0.1089	0.0818	0.1475	0.113	0.1354			101.6	0.0197	0.0071	0.0027	0.0399
551	1.38254	1.21318	1.20356	0.99946	0.999873	0.999912	1.18179	1.07184	1.07425	0.940955	0.989325	0.890457			551	1.09273	1.16004	1.12926	0.999802	0.99964	0.999895	1.0018	1.01672	1.00236	0.982902	0.944571	0.96865			102	0.0324	0.0316	0.0096	0.0636	0.0957	0.0263	0.1106	0.1103	0.0828	0.1466	0.1131	0.1362			102	0.0198	0.0064	0.0035	0.0395
551.2	1.3818	1.21264	1.20298	0.999749	0.999958	0.999925	1.18085	1.0709	1.07367	0.940766	0.989249	0.890171			551.2	1.0921	1.15954	1.12888	0.999734	0.999561	0.999826	1.00102	1.01598	1.00187	0.982297	0.944116	0.968093			102.4	0.033	0.0307	0.0092	0.0637	0.0957	0.0259	0.1091	0.1101	0.083	0.1474	0.1129	0.1358			102.4	0.0201	0.0064	0.0025	0.0401
551.4	1.38091	1.21204	1.20216	0.999979	1	1	1.17987	1.06959	1.07293	0.940515	0.98899	0.889891			551.4	1.09151	1.15915	1.12822	0.99931	0.999335	0.999609	1.00022	1.01505	1.0012	0.981404	0.943741	0.96748			102.8	0.0328	0.0314	0.0099	0.0646	0.0955	0.0263	0.1103	0.1109	0.0831	0.1472	0.1132	0.1364			102.8	0.0203	0.0074	0.0028	0.0408
551.6	1.38016	1.21136	1.20153	1	0.99991	0.999999	1.1791	1.06906	1.07224	0.940062	0.988455	0.889798			551.6	1.09098	1.1585	1.12743	0.998911	0.999112	0.999289	0.999481	1.01423	1.00045	0.980851	0.943314	0.967108			103.2	0.0335	0.0315	0.0099	0.0646	0.0971	0.0268	0.1105	0.1109	0.0842	0.1485	0.1134	0.1371			103.2	0.0201	0.0078	0.0023	0.0408
551.8	1.37921	1.2104	1.20074	0.99979	0.999628	0.999758	1.17816	1.06825	1.07144	0.939511	0.988	0.889718			551.8	1.09039	1.15792	1.12649	0.998542	0.999001	0.999056	0.998635	1.01292	0.999743	0.980325	0.942562	0.966539			103.6	0.0327	0.0315	0.01	0.0636	0.0964	0.0266	0.1103	0.1101	0.0839	0.1481	0.1123	0.1355			103.6	0.0198	0.0075	0.0027	0.0415
552	1.37812	1.20979	1.20018	0.999689	0.999576	0.999492	1.17712	1.06738	1.0706	0.939113	0.987794	0.889495			552	1.08974	1.15712	1.12616	0.998222	0.998832	0.998806	0.997827	1.01204	0.999013	0.97928	0.942004	0.965888			104	0.0338	0.031	0.0105	0.0642	0.0966	0.0263	0.111	0.1113	0.0848	0.1475	0.1132	0.1363			104	0.0197	0.0075	0.0035	0.0404
552.2	1.37705	1.20919	1.19931	0.999504	0.999739	0.999484	1.17573	1.06621	1.06969	0.938666	0.987438	0.888884			552.2	1.08902	1.15618	1.12577	0.997927	0.998502	0.99852	0.996913	1.01096	0.997817	0.978274	0.941081	0.965175			104.4	0.0336	0.0325	0.0105	0.0652	0.0959	0.0271	0.1103	0.1114	0.0843	0.1467	0.1138	0.1372			104.4	0.0198	0.0076	0.0036	0.0414
552.4	1.37621	1.2085	1.19847	0.999419	0.999608	0.999347	1.17478	1.06525	1.06881	0.938211	0.986699	0.888508			552.4	1.08828	1.15575	1.125	0.997502	0.998175	0.998022	0.996058	1.01043	0.996916	0.977627	0.940407	0.964425			104.8	0.0336	0.0315	0.0099	0.0658	0.0975	0.0275	0.1105	0.1123	0.0856	0.1486	0.1126	0.1362			104.8	0.0201	0.0062	0.0034	0.0411
552.6	1.37497	1.20732	1.19728	0.999222	0.999715	0.999264	1.17349	1.06408	1.0676	0.937594	0.985986	0.888148			552.6	1.08736	1.15497	1.12405	0.997207	0.99762	0.997294	0.995199	1.00952	0.995884	0.976729	0.939477	0.963683			105.2	0.0332	0.0322	0.0103	0.0652	0.097	0.0272	0.1101	0.1115	0.086	0.1476	0.1129	0.1364			105.2	0.0198	0.0068	0.0033	0.0413
552.8	1.3731	1.20618	1.1957	0.998503	0.999594	0.999108	1.17179	1.0627	1.06625	0.93685	0.985493	0.887706			552.8	1.08638	1.15385	1.1228	0.996545	0.996986	0.996288	0.993783	1.00838	0.994904	0.975653	0.938447	0.962802			105.6	0.0332	0.0317	0.0109	0.066	0.0995	0.0273	0.1101	0.1115	0.0858	0.1478	0.1124	0.1362			105.6	0.0208	0.0075	0.0033	0.0412
553	1.3723	1.20565	1.19506	0.998203	0.999282	0.998867	1.17094	1.06189	1.06555	0.936487	0.985351	0.88718			553	1.08579	1.15319	1.12217	0.996114	0.996922	0.995891	0.993075	1.00746	0.9942	0.975104	0.937982	0.962051			106	0.0344	0.032	0.0106	0.0655	0.0987	0.0272	0.1104	0.1116	0.0869	0.1486	0.1129	0.1363			106	0.0207	0.0075	0.0031	0.0423
553.2	1.37055	1.20413	1.19374	0.997841	0.998926	0.998812	1.16945	1.06039	1.06414	0.935277	0.984615	0.886287			553.2	1.08445	1.15165	1.12112	0.995437	0.996545	0.995071	0.991443	1.00606	0.992517	0.974147	0.936768	0.960543			106.4	0.0336	0.0325	0.01	0.0665	0.0989	0.028	0.1109	0.112	0.0875	0.1484	0.1132	0.1364			106.4	0.0209	0.0071	0.0038	0.0415
553.4	1.36933	1.20336	1.19273	0.997518	0.998639	0.99856	1.16839	1.05929	1.0632	0.934674	0.98386	0.885911			553.4	1.08367	1.15059	1.12031	0.994785	0.996121	0.994275	0.990226	1.00504	0.991631	0.973201	0.9359	0.959737			106.8	0.034	0.0334	0.0112	0.0651	0.0988	0.0281	0.1106	0.1114	0.0876	0.149	0.1133	0.1367			106.8	0.0203	0.0079	0.0029	0.0421
553.6	1.36752	1.20236	1.19146	0.997048	0.998134	0.998206	1.16698	1.05776	1.06188	0.934004	0.982996	0.885357			553.6	1.08243	1.14969	1.11936	0.993917	0.995568	0.993266	0.989013	1.00379	0.990564	0.971827	0.934846	0.958657			107.2	0.0337	0.033	0.0112	0.066	0.0993	0.027	0.11	0.1129	0.0874	0.1465	0.114	0.1368			107.2	0.0209	0.0067	0.0028	0.0425
553.8	1.36608	1.2012	1.19048	0.996442	0.997858	0.997833	1.16579	1.05673	1.06095	0.933335	0.982464	0.884583			553.8	1.08123	1.14875	1.1183	0.993265	0.994942	0.992684	0.987954	1.00285	0.989677	0.970844	0.933978	0.957709			107.6	0.0344	0.0336	0.0113	0.0667	0.1001	0.0285	0.11	0.1129	0.0875	0.1475	0.1137	0.1363			107.6	0.0208	0.0083	0.0034	0.0419
554	1.3643	1.19987	1.1893	0.995845	0.997361	0.997359	1.16402	1.05547	1.05963	0.932377	0.981571	0.883772			554	1.08018	1.14773	1.11706	0.992543	0.994145	0.991856	0.98641	1.00163	0.98861	0.969431	0.932861	0.956531			108	0.0347	0.0327	0.0111	0.0673	0.0994	0.0275	0.1113	0.1133	0.0889	0.1477	0.1126	0.1365			108	0.0214	0.0076	0.0032	0.0431
554.2	1.36292	1.19869	1.18814	0.995302	0.996909	0.99682	1.16263	1.05425	1.05868	0.931382	0.981086	0.883281			554.2	1.07919	1.14694	1.11607	0.991856	0.993648	0.99107	0.985136	1.00076	0.987552	0.968293	0.93185	0.95572			108.4	0.0345	0.0338	0.0111	0.067	0.1018	0.0283	0.1104	0.1126	0.0884	0.1484	0.113	0.1364			108.4	0.021	0.0072	0.0032	0.0429
554.4	1.36129	1.19738	1.18676	0.994763	0.996415	0.996151	1.16115	1.05295	1.05742	0.930108	0.980114	0.882383			554.4	1.07801	1.14576	1.11502	0.990981	0.99305	0.990186	0.983697	0.999327	0.986221	0.966746	0.93028	0.954558			108.8	0.0343	0.0334	0.0114	0.0668	0.1007	0.0286	0.1116	0.1129	0.0896	0.1477	0.1134	0.1365			108.8	0.0214	0.0078	0.0039	0.0437
554.6	1.3599	1.19629	1.18574	0.994104	0.99594	0.995823	1.15998	1.05198	1.05639	0.929261	0.979398	0.881834			554.6	1.07705	1.14483	1.11409	0.990202	0.992341	0.989392	0.982488	0.998367	0.985325	0.96568	0.929344	0.953585			109.2	0.0344	0.0341	0.0112	0.0663	0.1018	0.0283	0.1116	0.1131	0.0892	0.1487	0.1135	0.1374			109.2	0.0215	0.0082	0.0034	0.0429
554.8	1.358	1.19487	1.18454	0.993334	0.995581	0.995255	1.15832	1.05093	1.05496	0.928275	0.978526	0.881111			554.8	1.0757	1.14358	1.11287	0.98924	0.991412	0.988339	0.981029	0.997027	0.98428	0.964331	0.927997	0.952374			109.6	0.0341	0.0342	0.0114	0.0678	0.1009	0.0284	0.11	0.1134	0.0899	0.1485	0.1138	0.1367			109.6	0.0216	0.0074	0.0039	0.0439
555	1.35564	1.19294	1.18252	0.992508	0.994805	0.994509	1.15638	1.04916	1.05374	0.927127	0.977296	0.879724			555	1.07403	1.14225	1.11149	0.988503	0.990553	0.987247	0.97928	0.995613	0.982792	0.96276	0.92644	0.950745			110	0.0355	0.0349	0.0113	0.0675	0.1011	0.0285	0.1111	0.113	0.0906	0.1482	0.1128	0.1377			110	0.0221	0.0076	0.0027	0.0437
555.2	1.35434	1.19188	1.18142	0.992314	0.994425	0.994116	1.15532	1.04831	1.05294	0.926502	0.976647	0.87893			555.2	1.07307	1.14141	1.11061	0.987875	0.990012	0.986465	0.978179	0.995029	0.98164	0.961583	0.925733	0.949843			110.4	0.0357	0.0349	0.0116	0.0669	0.1012	0.0275	0.1115	0.1141	0.0911	0.148	0.114	0.1377			110.4	0.0216	0.0074	0.0039	0.0436
555.4	1.35158	1.18976	1.17933	0.991114	0.993254	0.993551	1.1533	1.04664	1.05131	0.92508	0.97541	0.877489			555.4	1.07145	1.13988	1.10867	0.986539	0.988777	0.985038	0.976164	0.993424	0.980103	0.960047	0.924049	0.948239			110.8	0.0351	0.0351	0.0121	0.0694	0.1019	0.0293	0.1113	0.1146	0.091	0.1487	0.1129	0.137			110.8	0.0219	0.0082	0.0034	0.0454
555.6	1.34956	1.18834	1.17803	0.990273	0.992507	0.99285	1.15235	1.04571	1.05	0.924062	0.974519	0.876859			555.6	1.07023	1.13869	1.10772	0.985847	0.987903	0.983966	0.975033	0.992274	0.979241	0.958466	0.923065	0.94702			111.2	0.0356	0.0341	0.0111	0.0676	0.1015	0.0299	0.111	0.1139	0.0915	0.1482	0.1132	0.138			111.2	0.0216	0.0087	0.0041	0.0435
555.8	1.34721	1.18638	1.17639	0.989243	0.991653	0.99209	1.15098	1.04427	1.04861	0.92273	0.97351	0.87593			555.8	1.06887	1.13713	1.10627	0.984844	0.986839	0.982764	0.97357	0.990637	0.978066	0.956698	0.921836	0.945662			111.6	0.0355	0.0349	0.0117	0.0686	0.1025	0.0292	0.111	0.114	0.0908	0.1485	0.114	0.137			111.6	0.0224	0.0085	0.0038	0.0445
556	1.34565	1.18501	1.17508	0.988409	0.990949	0.99125	1.1497	1.0432	1.04772	0.921613	0.972596	0.874847			556	1.0676	1.13599	1.10495	0.98389	0.986036	0.981885	0.972377	0.9892	0.977003	0.955431	0.920727	0.94433			112	0.0364	0.0357	0.0118	0.0685	0.1028	0.0302	0.1116	0.1141	0.0924	0.1482	0.1133	0.1384			112	0.0214	0.0076	0.0033	0.0441
556.2	1.34362	1.18309	1.17331	0.987695	0.990021	0.990333	1.14808	1.04181	1.04658	0.920336	0.971299	0.873358			556.2	1.066	1.13458	1.10328	0.982549	0.98493	0.980787	0.970869	0.987441	0.975479	0.953548	0.919183	0.942678			112.4	0.0363	0.0363	0.0117	0.0689	0.1035	0.029	0.1106	0.115	0.0923	0.1475	0.114	0.1383			112.4	0.022	0.0074	0.0042	0.0448
556.4	1.34157	1.18165	1.17167	0.986787	0.989417	0.989545	1.14681	1.04085	1.04562	0.919288	0.970052	0.872468			556.4	1.06478	1.1333	1.10201	0.981614	0.983876	0.979784	0.969594	0.986307	0.974554	0.951975	0.917967	0.941594			112.8	0.0365	0.0357	0.0118	0.069	0.1033	0.0302	0.1106	0.1143	0.093	0.148	0.1133	0.1375			112.8	0.0228	0.0076	0.0033	0.0449
556.6	1.3391	1.17996	1.16977	0.985881	0.988618	0.988426	1.14521	1.03963	1.04441	0.917769	0.968625	0.871369			556.6	1.06324	1.13188	1.10048	0.980357	0.982578	0.978568	0.968055	0.984799	0.973404	0.949786	0.916373	0.940375			113.2	0.0354	0.0357	0.0122	0.0699	0.1036	0.0297	0.1109	0.1154	0.0931	0.1485	0.1137	0.137			113.2	0.022	0.0084	0.0042	0.0453
556.8	1.3372	1.17818	1.16825	0.984993	0.987707	0.987571	1.14374	1.03869	1.04345	0.916495	0.967461	0.870269			556.8	1.06196	1.13053	1.09893	0.9793	0.981535	0.97762	0.966772	0.983702	0.972417	0.948249	0.914992	0.93882			113.6	0.0355	0.0351	0.0125	0.0691	0.1048	0.0303	0.1117	0.1141	0.0928	0.1478	0.1141	0.1372			113.6	0.0221	0.0092	0.0043	0.046
557	1.33499	1.17611	1.1664	0.983926	0.986766	0.986474	1.14234	1.0377	1.04211	0.914968	0.966205	0.868993			557	1.06028	1.1285	1.09705	0.978	0.980281	0.976335	0.965136	0.982199	0.970676	0.946617	0.913432	0.937057			114	0.0362	0.036	0.012	0.0704	0.1042	0.0303	0.1119	0.1151	0.0937	0.1485	0.114	0.138			114	0.0223	0.0083	0.0038	0.0449
557.2	1.33202	1.17368	1.164	0.98279	0.985566	0.984971	1.14068	1.03627	1.04084	0.913239	0.96406	0.867729			557.2	1.05832	1.12629	1.09517	0.976452	0.979029	0.974693	0.96346	0.980298	0.968853	0.944436	0.911511	0.934924			114.4	0.0364	0.0356	0.0123	0.0695	0.1047	0.0303	0.1106	0.1139	0.0941	0.1495	0.1137	0.1374			114.4	0.022	0.0089	0.004	0.0457
557.4	1.33046	1.17251	1.16295	0.982078	0.984963	0.984388	1.13988	1.0354	1.04019	0.912426	0.963082	0.866834			557.4	1.0571	1.12524	1.09411	0.975682	0.978369	0.973879	0.962588	0.979162	0.967942	0.943272	0.910398	0.934023			114.8	0.036	0.0363	0.0121	0.0701	0.1032	0.0299	0.1101	0.1153	0.094	0.1486	0.1139	0.1381			114.8	0.0212	0.009	0.0042	0.0463
557.6	1.32759	1.17008	1.16031	0.980535	0.983647	0.983163	1.13806	1.03426	1.0387	0.910376	0.960942	0.865305			557.6	1.05502	1.123	1.09185	0.973769	0.976477	0.972239	0.960516	0.976907	0.966295	0.940568	0.908489	0.931772			115.2	0.0367	0.0369	0.012	0.0701	0.1045	0.0307	0.1103	0.1155	0.0957	0.1486	0.113	0.1379			115.2	0.0233	0.0081	0.0045	0.0465
557.8	1.32563	1.16845	1.15858	0.979291	0.982702	0.982044	1.13682	1.03326	1.0376	0.908991	0.959639	0.863974			557.8	1.05346	1.12155	1.0902	0.972412	0.975455	0.971086	0.959211	0.975798	0.965265	0.939085	0.907094	0.930061			115.6	0.0365	0.0363	0.0127	0.0705	0.105	0.0305	0.1106	0.1146	0.0949	0.149	0.114	0.1379			115.6	0.0224	0.0085	0.0043	0.0468
558	1.32306	1.16626	1.1565	0.977932	0.981556	0.980639	1.13526	1.03206	1.03626	0.907108	0.958002	0.862429			558	1.05161	1.11963	1.08827	0.970972	0.974049	0.969545	0.957807	0.97429	0.963972	0.937042	0.905415	0.928135			116	0.0365	0.0365	0.0126	0.0702	0.1059	0.0303	0.1118	0.1155	0.0967	0.1492	0.1141	0.138			116	0.0229	0.0083	0.0048	0.0462
558.2	1.3209	1.16445	1.15476	0.976775	0.9804	0.979681	1.13411	1.03073	1.0355	0.905533	0.956528	0.861115			558.2	1.0502	1.11817	1.08673	0.969461	0.972916	0.968263	0.956386	0.973073	0.963041	0.935117	0.903911	0.926763			116.4	0.0375	0.0362	0.0131	0.0696	0.1068	0.0313	0.1112	0.1152	0.095	0.1482	0.1139	0.1375			116.4	0.0227	0.009	0.0041	0.0465
558.4	1.3184	1.16255	1.15262	0.975263	0.979117	0.978325	1.13261	1.02923	1.0344	0.90363	0.954807	0.859773			558.4	1.04839	1.11644	1.08496	0.967795	0.971532	0.96673	0.954792	0.971462	0.961834	0.932809	0.902003	0.924885			116.8	0.0371	0.0375	0.0124	0.0709	0.1064	0.0307	0.1115	0.1152	0.0953	0.1487	0.1141	0.138			116.8	0.0236	0.0085	0.0048	0.0466
558.6	1.31652	1.16074	1.1508	0.974011	0.977982	0.977196	1.13143	1.0284	1.03356	0.902145	0.953298	0.858617			558.6	1.04671	1.11482	1.08329	0.966581	0.970195	0.965508	0.953503	0.970472	0.960996	0.931136	0.900385	0.923516			117.2	0.0372	0.0376	0.0125	0.0704	0.1062	0.0312	0.1114	0.1148	0.0963	0.1486	0.1144	0.1383			117.2	0.0232	0.0095	0.0042	0.0467
558.8	1.31407	1.15853	1.14861	0.972715	0.976629	0.975646	1.12993	1.02715	1.03272	0.900335	0.951297	0.857066			558.8	1.04484	1.11273	1.08121	0.965062	0.96848	0.963777	0.951965	0.968969	0.959575	0.928999	0.898192	0.921657			117.6	0.0364	0.038	0.013	0.0708	0.1067	0.032	0.111	0.1156	0.0955	0.1496	0.1136	0.1376			117.6	0.0236	0.0093	0.0047	0.0468
559	1.31183	1.1568	1.14668	0.97141	0.975654	0.974433	1.1285	1.02607	1.03207	0.898677	0.949611	0.855587			559	1.04324	1.11097	1.07927	0.963524	0.967129	0.962567	0.950637	0.967654	0.958453	0.927399	0.896566	0.919988			118	0.0371	0.0371	0.0127	0.0714	0.1069	0.0313	0.111	0.1167	0.0962	0.1493	0.1133	0.138			118	0.0235	0.0089	0.0052	0.0476
559.2	1.30891	1.1546	1.14442	0.9698	0.974292	0.972862	1.12683	1.02482	1.03131	0.896488	0.947625	0.853731			559.2	1.04121	1.10859	1.07701	0.96181	0.965411	0.960966	0.948787	0.966077	0.957295	0.924998	0.894478	0.917606			118.4	0.0368	0.0377	0.0126	0.0715	0.1079	0.0323	0.111	0.1161	0.0962	0.1502	0.1137	0.1377			118.4	0.0241	0.0078	0.0049	0.0468
559.4	1.30515	1.15186	1.14152	0.968015	0.972424	0.971217	1.12539	1.02335	1.03006	0.89409	0.944949	0.852208			559.4	1.03858	1.10618	1.07437	0.959629	0.963427	0.959104	0.946763	0.964693	0.955997	0.921943	0.892177	0.915556			118.8	0.0381	0.038	0.0131	0.0708	0.1079	0.0319	0.1113	0.1155	0.097	0.1484	0.1144	0.1373			118.8	0.0237	0.0094	0.0051	0.0473
559.6	1.30334	1.15031	1.14027	0.966926	0.971504	0.970021	1.12473	1.0227	1.02967	0.892693	0.943652	0.85135			559.6	1.03747	1.1049	1.07296	0.958799	0.962419	0.958008	0.945994	0.963701	0.955287	0.920515	0.89108	0.914249			119.2	0.0376	0.0389	0.0129	0.0715	0.1072	0.032	0.111	0.1171	0.0974	0.1494	0.1141	0.1381			119.2	0.0239	0.0088	0.005	0.0479
559.8	1.30015	1.14726	1.13745	0.96498	0.969335	0.967942	1.12317	1.02115	1.02887	0.890066	0.941405	0.849197			559.8	1.03476	1.10212	1.07021	0.956541	0.960261	0.955881	0.944156	0.962041	0.953678	0.917672	0.888782	0.911687			119.6	0.0385	0.0378	0.013	0.0722	0.1071	0.0322	0.1115	0.1161	0.097	0.1486	0.1141	0.1379			119.6	0.024	0.009	0.0053	0.0475
560	1.29787	1.14528	1.13535	0.963616	0.968073	0.966526	1.12217	1.02019	1.02835	0.88856	0.939692	0.847768			560	1.0329	1.10033	1.06843	0.955191	0.958828	0.95432	0.942878	0.960733	0.952657	0.915749	0.887193	0.909987			120	0.038	0.0394	0.0133	0.0728	0.1079	0.0321	0.112	0.1167	0.0975	0.1484	0.1141	0.1379			120	0.0242	0.009	0.0054	0.048
560.2	1.29485	1.14291	1.13285	0.961911	0.966611	0.964852	1.12086	1.0191	1.0277	0.886608	0.937699	0.845861			560.2	1.03062	1.09818	1.06629	0.953487	0.956979	0.952101	0.941229	0.959235	0.951651	0.913216	0.885277	0.907798			120.4	0.038	0.039	0.0138	0.0727	0.1075	0.032	0.1107	0.1163	0.0982	0.1484	0.1145	0.1371			120.4	0.0233	0.0096	0.0049	0.0487
560.4	1.29252	1.14085	1.13093	0.960486	0.965092	0.963478	1.11982	1.01818	1.02743	0.884996	0.935899	0.844221			560.4	1.02892	1.09637	1.06437	0.951911	0.955548	0.950617	0.939841	0.958087	0.950839	0.910898	0.883492	0.905866			120.8	0.0381	0.0386	0.0134	0.0727	0.1092	0.0321	0.1117	0.117	0.0989	0.1486	0.114	0.1381			120.8	0.0248	0.0096	0.0049	0.0482
560.6	1.28933	1.13836	1.12828	0.9588	0.963169	0.961857	1.11865	1.0171	1.02702	0.882874	0.933823	0.842178			560.6	1.02701	1.09425	1.06202	0.949979	0.953431	0.948792	0.93813	0.956856	0.949999	0.907976	0.881421	0.903651			121.2	0.0382	0.0391	0.0134	0.0734	0.1086	0.0322	0.1113	0.1163	0.0978	0.1493	0.114	0.1383			121.2	0.0247	0.0097	0.0042	0.0493
560.8	1.28695	1.13611	1.12601	0.957495	0.961741	0.960397	1.11796	1.01638	1.02675	0.88116	0.9321	0.840764			560.8	1.02513	1.09219	1.06001	0.94821	0.951814	0.947258	0.937007	0.955778	0.949268	0.906083	0.87971	0.901713			121.6	0.0383	0.0394	0.0128	0.0727	0.109	0.0326	0.111	0.1167	0.0993	0.1492	0.1146	0.1383			121.6	0.025	0.0094	0.0048	0.0483
561	1.28377	1.13328	1.12348	0.955718	0.959964	0.958559	1.11699	1.01542	1.0266	0.87902	0.930024	0.838728			561	1.02287	1.08966	1.0577	0.9462	0.949922	0.945408	0.935686	0.954599	0.948411	0.903671	0.877618	0.899237			122	0.0387	0.0387	0.013	0.0737	0.1085	0.0327	0.1113	0.1169	0.0987	0.1492	0.1151	0.1387			122	0.0242	0.0096	0.0049	0.0491
561.2	1.28097	1.1311	1.12122	0.95437	0.958414	0.957201	1.11617	1.01474	1.02648	0.877231	0.928127	0.837364			561.2	1.02099	1.08771	1.05574	0.944712	0.948362	0.943681	0.934646	0.953436	0.947653	0.901392	0.875958	0.897675			122.4	0.0391	0.0401	0.0126	0.0735	0.1093	0.0337	0.1114	0.1174	0.0989	0.1489	0.1141	0.1388			122.4	0.0249	0.0106	0.0049	0.0491
561.4	1.2777	1.12842	1.11845	0.952719	0.956422	0.955155	1.11517	1.01412	1.02664	0.874947	0.925818	0.835622			561.4	1.01869	1.08529	1.05324	0.942695	0.946438	0.941587	0.93317	0.952249	0.946662	0.898631	0.873864	0.895536			122.8	0.0382	0.0397	0.0133	0.074	0.1104	0.0333	0.1108	0.1168	0.0991	0.1491	0.1145	0.1383			122.8	0.0238	0.0094	0.0051	0.0494
561.6	1.27364	1.12522	1.11496	0.950366	0.954011	0.9527	1.11415	1.01379	1.0263	0.872172	0.92336	0.833176			561.6	1.0156	1.08209	1.05014	0.940655	0.943561	0.939224	0.931781	0.950798	0.945193	0.895353	0.871344	0.892594			123.2	0.0389	0.0398	0.0135	0.074	0.1098	0.0338	0.1112	0.1176	0.0993	0.1494	0.1145	0.1382			123.2	0.0245	0.0093	0.0049	0.0485
561.8	1.27079	1.12286	1.11277	0.948934	0.952601	0.95091	1.11373	1.01336	1.02621	0.870271	0.921619	0.831686			561.8	1.0135	1.08001	1.04824	0.939028	0.941835	0.937647	0.930614	0.949727	0.944262	0.89289	0.869637	0.89062			123.6	0.0384	0.0403	0.0139	0.0741	0.1103	0.0336	0.1118	0.1171	0.1004	0.1491	0.1144	0.1389			123.6	0.0249	0.0093	0.0051	0.0498
562	1.26726	1.12016	1.10994	0.94709	0.950827	0.949029	1.11319	1.01285	1.02619	0.867905	0.91937	0.829673			562	1.01111	1.0773	1.04581	0.936842	0.939692	0.935655	0.929253	0.948311	0.943409	0.889817	0.867603	0.88811			124	0.0394	0.0403	0.014	0.0742	0.1101	0.0343	0.1121	0.1164	0.1003	0.1481	0.1142	0.1387			124	0.0247	0.0095	0.0045	0.0494
562.2	1.26456	1.11779	1.10762	0.945652	0.949135	0.947497	1.11302	1.01255	1.02629	0.865956	0.917601	0.828203			562.2	1.00884	1.07525	1.04375	0.93519	0.938007	0.934096	0.928282	0.947572	0.943077	0.887383	0.865836	0.886207			124.4	0.039	0.0403	0.0132	0.0735	0.1104	0.0338	0.1115	0.1174	0.1013	0.1499	0.1147	0.1387			124.4	0.0251	0.0103	0.0056	0.0497
562.4	1.26126	1.1147	1.10484	0.94393	0.946959	0.94563	1.11265	1.01234	1.0265	0.863498	0.915576	0.826339			562.4	1.00621	1.07263	1.04109	0.933073	0.935773	0.932074	0.926801	0.946605	0.942611	0.884377	0.863765	0.883953			124.8	0.0392	0.0402	0.0139	0.0747	0.11	0.0344	0.1112	0.1165	0.1	0.149	0.1156	0.139			124.8	0.0249	0.0109	0.0051	0.0496
562.6	1.25852	1.11213	1.10245	0.942249	0.945252	0.943942	1.11229	1.01216	1.02673	0.861476	0.913714	0.824616			562.6	1.00397	1.07055	1.03916	0.93157	0.933992	0.93027	0.925716	0.945637	0.941953	0.882396	0.861781	0.881956			125.2	0.0391	0.0409	0.0141	0.0739	0.1101	0.0337	0.1117	0.1172	0.1	0.1493	0.1145	0.1386			125.2	0.0249	0.0099	0.0057	0.0498
562.8	1.25493	1.10897	1.09964	0.940181	0.94315	0.941837	1.11195	1.01195	1.02732	0.858989	0.911468	0.822225			562.8	1.0014	1.06773	1.03665	0.929483	0.931603	0.927843	0.924601	0.944412	0.941092	0.879501	0.859385	0.879168			125.6	0.0385	0.0404	0.0146	0.0752	0.1106	0.0347	0.1117	0.1166	0.1003	0.1501	0.1142	0.1384			125.6	0.0251	0.0097	0.0061	0.0495
563	1.25214	1.10669	1.09707	0.938384	0.941516	0.940227	1.11176	1.01173	1.02732	0.856811	0.909535	0.820625			563	0.9994	1.06545	1.03471	0.927626	0.929903	0.92626	0.923712	0.943707	0.94064	0.877116	0.857482	0.877091			126	0.0395	0.0405	0.0142	0.075	0.1121	0.0343	0.1112	0.1179	0.1024	0.1495	0.114	0.1378			126	0.0256	0.0104	0.0047	0.0499
563.2	1.24855	1.10383	1.09392	0.936287	0.939442	0.938279	1.11143	1.01175	1.02763	0.85413	0.907214	0.818785			563.2	0.996808	1.06267	1.03203	0.925383	0.927642	0.924248	0.922619	0.942995	0.940048	0.873999	0.854839	0.874566			126.4	0.0401	0.0408	0.0143	0.0743	0.1112	0.0337	0.1121	0.1178	0.1021	0.1486	0.1139	0.1384			126.4	0.0255	0.0092	0.0056	0.0505
563.4	1.24437	1.10027	1.09047	0.933628	0.936805	0.935989	1.11142	1.0117	1.02812	0.850777	0.904604	0.816196			563.4	0.993731	1.05924	1.02859	0.92245	0.924974	0.921816	0.921423	0.941985	0.939766	0.870325	0.851957	0.871701			126.8	0.0393	0.0407	0.0146	0.0751	0.1112	0.0352	0.1113	0.1178	0.101	0.1489	0.1136	0.1393			126.8	0.026	0.0102	0.0057	0.0511
563.6	1.24145	1.09796	1.088	0.932015	0.934865	0.93422	1.11148	1.01178	1.02863	0.84856	0.902628	0.814486			563.6	0.991467	1.05702	1.02633	0.920648	0.923001	0.920171	0.920757	0.94134	0.939445	0.867934	0.849921	0.869596			127.2	0.0392	0.0418	0.0142	0.0757	0.1107	0.035	0.1114	0.1172	0.1012	0.1497	0.115	0.1391			127.2	0.0247	0.0105	0.0057	0.0518
563.8	1.23768	1.09504	1.08485	0.929867	0.932694	0.931877	1.11153	1.01223	1.02939	0.84552	0.900177	0.812492			563.8	0.988714	1.05437	1.02347	0.918382	0.920644	0.917789	0.919793	0.940514	0.939198	0.864923	0.847533	0.867			127.6	0.0398	0.042	0.0141	0.0754	0.1122	0.0353	0.1109	0.1176	0.1023	0.1489	0.1145	0.1391			127.6	0.0258	0.0099	0.0056	0.0509
564	1.23469	1.0925	1.08249	0.928056	0.931254	0.930019	1.11174	1.01251	1.02998	0.84303	0.898431	0.810778			564	0.986193	1.05212	1.02136	0.916685	0.919003	0.915824	0.919204	0.939815	0.938809	0.862524	0.845842	0.864932			128	0.0397	0.0416	0.0142	0.0761	0.1126	0.0357	0.1108	0.1176	0.1016	0.1487	0.1142	0.1388			128	0.0254	0.0103	0.0054	0.0511
564.2	1.23098	1.08942	1.07946	0.925909	0.929121	0.92762	1.1122	1.01276	1.03073	0.839965	0.896392	0.808593			564.2	0.98332	1.04938	1.01858	0.914442	0.916799	0.913183	0.918666	0.93913	0.938169	0.859263	0.84358	0.862486			128.4	0.0403	0.0422	0.0148	0.0763	0.112	0.0354	0.1116	0.1187	0.1026	0.1489	0.1138	0.1379			128.4	0.0262	0.0107	0.0054	0.0508
564.4	1.22814	1.08684	1.07701	0.924108	0.927408	0.925804	1.1124	1.0132	1.03149	0.837533	0.894552	0.807011			564.4	0.981086	1.04718	1.01626	0.912687	0.914786	0.91139	0.918094	0.93849	0.938045	0.856562	0.841713	0.860605			128.8	0.0403	0.0416	0.0142	0.0754	0.113	0.0357	0.1121	0.118	0.1016	0.1489	0.1147	0.1386			128.8	0.0265	0.0105	0.0052	0.051
564.6	1.22474	1.08356	1.07403	0.92177	0.925059	0.923408	1.11307	1.01381	1.03263	0.834803	0.892448	0.80495			564.6	0.97852	1.04436	1.01345	0.91047	0.912249	0.909216	0.917279	0.93811	0.93793	0.853556	0.839016	0.858158			129.2	0.0407	0.0418	0.014	0.0756	0.1124	0.0354	0.1114	0.118	0.1029	0.1488	0.115	0.1387			129.2	0.0256	0.0108	0.0054	0.0518
564.8	1.22149	1.08117	1.07151	0.919709	0.923241	0.921761	1.11379	1.01416	1.03352	0.832479	0.89037	0.803321			564.8	0.976379	1.04199	1.01129	0.908608	0.910576	0.907307	0.916682	0.937531	0.937818	0.85119	0.837049	0.855962			129.6	0.0398	0.0427	0.0146	0.076	0.1128	0.036	0.112	0.1174	0.1025	0.1495	0.1154	0.1389			129.6	0.026	0.0102	0.0055	0.0519
565	1.2175	1.07809	1.06816	0.917297	0.921018	0.919533	1.11464	1.01478	1.03458	0.829491	0.887704	0.801202			565	0.973914	1.03886	1.00872	0.905939	0.908185	0.904963	0.91583	0.937031	0.937635	0.848341	0.834595	0.85348			130	0.0401	0.0425	0.0146	0.0767	0.1133	0.0356	0.1121	0.1181	0.1026	0.1496	0.1142	0.1391			130	0.0263	0.0106	0.0054	0.0522
565.2	1.21445	1.07563	1.06557	0.915345	0.918998	0.91794	1.11539	1.01534	1.03565	0.826846	0.885797	0.799346			565.2	0.97159	1.03648	1.00639	0.904019	0.906407	0.903009	0.915516	0.936628	0.93751	0.846091	0.832776	0.851447			130.4	0.0405	0.0424	0.0146	0.0772	0.113	0.0357	0.1123	0.1182	0.1037	0.149	0.1146	0.1391			130.4	0.0262	0.0112	0.0055	0.0521
565.4	1.21058	1.0724	1.06221	0.912879	0.916605	0.915578	1.11636	1.01608	1.03711	0.823344	0.883544	0.797119			565.4	0.968645	1.03358	1.00355	0.901741	0.904082	0.900445	0.915333	0.936263	0.937577	0.843172	0.830305	0.849178			130.8	0.0409	0.0426	0.0153	0.0768	0.1124	0.0356	0.1124	0.1184	0.1028	0.149	0.1144	0.1388			130.8	0.0262	0.0115	0.0063	0.053
565.6	1.20613	1.06872	1.05829	0.909923	0.913862	0.912892	1.1176	1.01757	1.0392	0.819792	0.880725	0.794514			565.6	0.96554	1.03014	1	0.898775	0.901222	0.897506	0.915112	0.935936	0.93751	0.839246	0.827288	0.846361			131.2	0.041	0.0437	0.0153	0.0762	0.114	0.0366	0.1121	0.1187	0.104	0.1483	0.1146	0.1388			131.2	0.0272	0.0107	0.0063	0.0516
565.8	1.20317	1.06626	1.05553	0.907932	0.912132	0.91081	1.11859	1.01859	1.04057	0.817577	0.878825	0.792498			565.8	0.963124	1.02765	0.997773	0.896863	0.899342	0.895617	0.914965	0.935725	0.937808	0.836631	0.825486	0.844029			131.6	0.0409	0.0425	0.0151	0.0774	0.1134	0.0363	0.1111	0.119	0.1031	0.1498	0.1154	0.1393			131.6	0.0266	0.0105	0.0064	0.0531
566	1.19952	1.06318	1.05216	0.905333	0.909753	0.908382	1.12003	1.01999	1.04259	0.814619	0.876187	0.790174			566	0.960134	1.02446	0.994789	0.894266	0.897207	0.893168	0.914827	0.935471	0.937995	0.833106	0.823274	0.841411			132	0.0412	0.044	0.0148	0.0778	0.1137	0.0361	0.1117	0.1176	0.1036	0.1486	0.1147	0.1389			132	0.0272	0.0112	0.0064	0.0528
566.2	1.19641	1.06069	1.04935	0.90338	0.907748	0.906432	1.12112	1.021	1.04441	0.812095	0.874118	0.78835			566.2	0.957787	1.02209	0.992245	0.892347	0.895146	0.89105	0.914817	0.935258	0.938261	0.830551	0.82119	0.839359			132.4	0.0407	0.0434	0.0149	0.0775	0.1147	0.036	0.1125	0.1192	0.1045	0.1507	0.1149	0.1404			132.4	0.026	0.0104	0.0061	0.0527
566.4	1.19245	1.0575	1.04593	0.901059	0.905181	0.903882	1.12273	1.0225	1.04697	0.809134	0.871739	0.786236			566.4	0.954815	1.01918	0.988958	0.889992	0.892616	0.888479	0.914538	0.93519	0.938961	0.827212	0.81866	0.836871			132.8	0.0418	0.0431	0.0149	0.0775	0.1139	0.0372	0.112	0.1191	0.1038	0.1499	0.1142	0.1394			132.8	0.0269	0.0114	0.0064	0.0532
566.6	1.18942	1.05482	1.04343	0.899132	0.903356	0.901714	1.12431	1.02379	1.04904	0.806761	0.869614	0.784575			566.6	0.952607	1.01679	0.986446	0.888136	0.890482	0.886273	0.914256	0.935031	0.939329	0.824673	0.816893	0.834832			133.2	0.0412	0.0441	0.0152	0.0774	0.1145	0.0363	0.1123	0.1178	0.1039	0.1501	0.1148	0.1395			133.2	0.0278	0.0113	0.0057	0.0535
566.8	1.18544	1.05136	1.04003	0.896768	0.900884	0.899251	1.12639	1.02538	1.05157	0.803915	0.867246	0.782443			566.8	0.949731	1.01399	0.98346	0.885569	0.887761	0.883602	0.914208	0.934829	0.939759	0.821417	0.814892	0.832097			133.6	0.0417	0.0439	0.0145	0.0775	0.1144	0.037	0.112	0.1196	0.1036	0.1487	0.115	0.139			133.6	0.0267	0.0099	0.0069	0.054
567	1.1824	1.04872	1.0374	0.894786	0.899081	0.897401	1.12806	1.02707	1.05359	0.801317	0.865371	0.780659			567	0.947317	1.01151	0.981029	0.883502	0.885801	0.881664	0.914204	0.93491	0.940323	0.818637	0.813134	0.830276			134	0.0418	0.0443	0.0158	0.0779	0.114	0.0376	0.1122	0.1185	0.1036	0.1484	0.115	0.1393			134	0.0276	0.0114	0.006	0.0539
567.2	1.17848	1.04546	1.03395	0.892334	0.896546	0.895246	1.13029	1.02919	1.05625	0.798286	0.862999	0.778487			567.2	0.944323	1.00837	0.97794	0.880997	0.883172	0.879262	0.914137	0.935203	0.941241	0.815476	0.81077	0.828082			134.4	0.0418	0.0444	0.0147	0.0783	0.1141	0.037	0.1113	0.1194	0.1046	0.1489	0.1143	0.1401			134.4	0.0266	0.011	0.0067	0.0545
567.4	1.17381	1.0413	1.02973	0.889193	0.893189	0.892481	1.13274	1.03153	1.06009	0.794712	0.859622	0.775924			567.4	0.940948	1.00448	0.974098	0.877847	0.87974	0.876277	0.914239	0.935514	0.942682	0.811345	0.807609	0.824995			134.8	0.0416	0.0436	0.0159	0.0778	0.1141	0.0377	0.1115	0.1187	0.1046	0.1493	0.1149	0.1395			134.8	0.028	0.0106	0.0065	0.0541
567.6	1.17058	1.03872	1.0269	0.887229	0.891022	0.890484	1.13456	1.03356	1.06267	0.792091	0.85769	0.774361			567.6	0.938432	1.00184	0.971589	0.875881	0.877676	0.874268	0.914235	0.935889	0.943511	0.808586	0.805607	0.823062			135.2	0.0411	0.0452	0.0159	0.0783	0.1148	0.0376	0.1117	0.1185	0.1045	0.1509	0.1143	0.1392			135.2	0.0275	0.0121	0.0058	0.0544
567.8	1.16657	1.03546	1.02319	0.884788	0.888379	0.888218	1.13699	1.0358	1.06603	0.788961	0.855474	0.772514			567.8	0.935288	0.998692	0.968524	0.87323	0.875193	0.871633	0.914191	0.936528	0.94433	0.805186	0.803071	0.82051			135.6	0.0418	0.0447	0.0156	0.0789	0.114	0.0378	0.1115	0.119	0.1049	0.1497	0.115	0.1389			135.6	0.0272	0.0118	0.0061	0.054
568	1.16342	1.03282	1.0204	0.882905	0.88639	0.886321	1.13921	1.03786	1.06856	0.786429	0.853638	0.770658			568	0.932857	0.995971	0.965836	0.871238	0.873248	0.869606	0.914563	0.936935	0.944995	0.802383	0.801348	0.818515			136	0.0421	0.0452	0.0157	0.0789	0.1147	0.0378	0.1123	0.1194	0.1044	0.1486	0.1151	0.1398			136	0.0278	0.0106	0.0059	0.054
568.2	1.15959	1.02944	1.017	0.880554	0.883907	0.883795	1.14192	1.04078	1.07219	0.78349	0.851475	0.768255			568.2	0.929636	0.992888	0.962498	0.868502	0.870465	0.867114	0.915054	0.937496	0.946244	0.7989	0.798815	0.815881			136.4	0.0427	0.0457	0.0156	0.0783	0.1157	0.0376	0.112	0.1196	0.1054	0.1487	0.1138	0.1394			136.4	0.0282	0.012	0.0068	0.0545
568.4	1.1565	1.02676	1.0143	0.878663	0.882062	0.881686	1.14437	1.04323	1.07547	0.781058	0.849644	0.766672			568.4	0.927027	0.990308	0.959632	0.866446	0.868521	0.864834	0.915559	0.937936	0.947869	0.7958	0.796979	0.813807			136.8	0.0427	0.0454	0.0157	0.079	0.116	0.0382	0.112	0.1186	0.1058	0.149	0.1154	0.1399			136.8	0.0278	0.0114	0.0072	0.0551
568.6	1.15273	1.02323	1.01107	0.876269	0.879464	0.879025	1.14749	1.04631	1.0795	0.777976	0.84734	0.764503			568.6	0.924038	0.98715	0.95629	0.863773	0.865906	0.861983	0.916389	0.938453	0.949659	0.791979	0.794499	0.811404			137.2	0.0419	0.0448	0.0155	0.0792	0.1145	0.039	0.1121	0.1188	0.1042	0.149	0.1147	0.1397			137.2	0.028	0.011	0.0062	0.0553
568.8	1.14952	1.02048	1.00852	0.874267	0.877441	0.877005	1.15014	1.04878	1.08284	0.77546	0.845345	0.762675			568.8	0.921497	0.984519	0.953708	0.861503	0.86365	0.859935	0.916799	0.939169	0.950945	0.789101	0.792509	0.809133			137.6	0.0417	0.0453	0.0158	0.0794	0.1152	0.0384	0.1114	0.1184	0.1052	0.1514	0.1153	0.1395			137.6	0.0274	0.0122	0.0069	0.0541
569	1.1456	1.01683	1.00524	0.871693	0.874875	0.874353	1.15337	1.05195	1.08701	0.772491	0.842969	0.760468			569	0.918233	0.981129	0.95051	0.858869	0.861101	0.8572	0.917287	0.939976	0.952751	0.785645	0.790294	0.806574			138	0.0428	0.0453	0.0159	0.0794	0.1159	0.0384	0.1125	0.1194	0.1046	0.1501	0.1146	0.1401			138	0.028	0.0126	0.0068	0.056
569.2	1.14094	1.01258	1.00116	0.868844	0.871491	0.871369	1.15737	1.05575	1.09228	0.768768	0.840218	0.758048			569.2	0.914608	0.977523	0.94657	0.855665	0.857974	0.854133	0.918148	0.94156	0.954601	0.781352	0.787333	0.803893			138.4	0.0429	0.0465	0.0173	0.079	0.1157	0.0394	0.1123	0.1185	0.1049	0.15	0.115	0.1397			138.4	0.0291	0.0126	0.0075	0.0545
569.4	1.13787	1.00995	0.998547	0.866916	0.869678	0.869418	1.16024	1.05829	1.09583	0.766332	0.838706	0.756436			569.4	0.91215	0.974838	0.944173	0.853436	0.855802	0.852006	0.91898	0.942463	0.955959	0.778605	0.785669	0.801881			138.8	0.043	0.0458	0.0162	0.0799	0.1159	0.0393	0.1119	0.1184	0.1064	0.1493	0.1141	0.1395			138.8	0.0289	0.0116	0.0073	0.0557
569.6	1.13388	1.00644	0.995101	0.864216	0.86738	0.866891	1.16398	1.0616	1.10028	0.76343	0.836707	0.754313			569.6	0.908872	0.971814	0.941133	0.85059	0.853172	0.849376	0.919847	0.943431	0.957476	0.775536	0.783602	0.799379			139.2	0.0431	0.0463	0.0164	0.0804	0.1159	0.0394	0.112	0.1186	0.1057	0.1496	0.1148	0.1393			139.2	0.0284	0.0117	0.0068	0.0547
569.8	1.13049	1.00352	0.992435	0.862015	0.865324	0.864831	1.16737	1.06459	1.10407	0.760786	0.835027	0.752464			569.8	0.906443	0.96919	0.938651	0.848309	0.851078	0.847106	0.92097	0.944286	0.959355	0.772718	0.781908	0.797151			139.6	0.043	0.0466	0.0165	0.0795	0.117	0.0389	0.1119	0.1193	0.1062	0.1488	0.1149	0.1398			139.6	0.028	0.0112	0.0062	0.0557
570	1.1264	1.00017	0.98885	0.859248	0.862584	0.862405	1.17153	1.06851	1.10875	0.757746	0.833083	0.75009			570	0.903021	0.965657	0.935596	0.84545	0.848543	0.844463	0.922598	0.94538	0.961894	0.769229	0.779691	0.794582			140	0.0437	0.0462	0.0163	0.0804	0.1156	0.0392	0.112	0.1193	0.1065	0.1493	0.1149	0.1396			140	0.0287	0.012	0.0069	0.0562
570.2	1.12315	0.997364	0.986063	0.857034	0.860432	0.860175	1.17495	1.07173	1.11298	0.755282	0.83113	0.748611			570.2	0.900629	0.962837	0.93284	0.843378	0.846442	0.842123	0.923795	0.946692	0.96395	0.766485	0.777703	0.792967			140.4	0.0432	0.0466	0.0166	0.0808	0.1173	0.0392	0.1116	0.1193	0.1061	0.1508	0.1145	0.1396			140.4	0.0289	0.0126	0.0071	0.0566
570.4	1.11911	0.993904	0.982452	0.85435	0.857858	0.857372	1.17964	1.07544	1.11834	0.752255	0.828816	0.746369			570.4	0.89745	0.95958	0.929478	0.840759	0.843912	0.839239	0.925186	0.947978	0.966249	0.762898	0.775301	0.790583			140.8	0.0435	0.0475	0.0164	0.0813	0.1162	0.0383	0.1127	0.1182	0.1075	0.1486	0.1142	0.1396			140.8	0.0279	0.0115	0.0074	0.0563
570.6	1.11569	0.991057	0.979677	0.852234	0.855964	0.855123	1.18328	1.07871	1.12254	0.749559	0.827383	0.744544			570.6	0.894971	0.956732	0.926947	0.838445	0.841798	0.837101	0.926436	0.9491	0.967828	0.759923	0.773687	0.788804			141.2	0.0431	0.0474	0.0169	0.0808	0.1168	0.0396	0.1119	0.1186	0.1056	0.1486	0.1151	0.1389			141.2	0.0291	0.0117	0.0075	0.0565
570.8	1.1116	0.98779	0.976288	0.849578	0.853289	0.852468	1.18799	1.08304	1.12787	0.746567	0.825683	0.742276			570.8	0.891797	0.953514	0.923839	0.835637	0.839216	0.834272	0.927742	0.950634	0.970113	0.756299	0.771642	0.786553			141.6	0.044	0.0482	0.0167	0.0811	0.1174	0.04	0.112	0.1192	0.107	0.1488	0.1152	0.1391			141.6	0.0292	0.0115	0.0072	0.0571
571	1.10671	0.983584	0.972103	0.846408	0.850307	0.849506	1.19367	1.0885	1.13433	0.743122	0.823231	0.739307			571	0.888029	0.949617	0.920234	0.832114	0.83598	0.8311	0.92923	0.952468	0.973166	0.75204	0.769012	0.783658			142	0.0441	0.0467	0.0165	0.0801	0.1171	0.0409	0.1116	0.1196	0.1065	0.1499	0.1157	0.1403			142	0.0291	0.0124	0.0077	0.0562
571.2	1.10423	0.98144	0.970371	0.844799	0.848746	0.847724	1.19704	1.09148	1.13773	0.741478	0.821836	0.737851			571.2	0.886219	0.947535	0.918327	0.830382	0.834356	0.829325	0.930486	0.953344	0.974864	0.749996	0.767826	0.782109			142.4	0.0437	0.0481	0.0159	0.0812	0.1174	0.0396	0.1122	0.119	0.1064	0.1489	0.1147	0.1393			142.4	0.0289	0.0129	0.0078	0.0566
571.4	1.10036	0.977817	0.966959	0.842154	0.846044	0.844853	1.202	1.09619	1.14389	0.738247	0.819611	0.735841			571.4	0.883057	0.944332	0.915245	0.827675	0.83157	0.826479	0.932326	0.954865	0.977919	0.746289	0.765646	0.779812			142.8	0.0436	0.0481	0.0174	0.0811	0.1167	0.0402	0.1131	0.1196	0.1066	0.1497	0.1143	0.1391			142.8	0.0293	0.0119	0.0073	0.0562
571.6	1.09712	0.975022	0.964026	0.839919	0.8439	0.842625	1.20615	1.09976	1.14849	0.735693	0.817895	0.734296			571.6	0.880439	0.941692	0.91279	0.825487	0.829475	0.824168	0.933699	0.956499	0.980299	0.743149	0.764154	0.77825			143.2	0.044	0.0479	0.0162	0.0811	0.1174	0.0403	0.1122	0.1187	0.1064	0.1495	0.1156	0.1398			143.2	0.0283	0.0127	0.0076	0.0572
571.8	1.09202	0.970508	0.959943	0.836727	0.840576	0.839364	1.21276	1.10537	1.15532	0.73225	0.815438	0.731829			571.8	0.876722	0.937636	0.909221	0.822411	0.825794	0.820811	0.935817	0.958633	0.983098	0.738993	0.7615	0.775306			143.6	0.0444	0.0477	0.0172	0.0814	0.1174	0.0409	0.1127	0.1185	0.1076	0.1483	0.1155	0.1398			143.6	0.0295	0.0128	0.0073	0.0567
572	1.08775	0.967145	0.956198	0.833906	0.837782	0.836744	1.21822	1.11076	1.16148	0.729274	0.813415	0.729657			572	0.87346	0.93437	0.906097	0.819663	0.823105	0.817936	0.937304	0.960495	0.985769	0.735408	0.759544	0.772725			144	0.044	0.0485	0.0174	0.0811	0.1177	0.0408	0.1119	0.119	0.1073	0.1486	0.1145	0.1396			144	0.0294	0.0132	0.0071	0.0578
572.2	1.08456	0.964316	0.95332	0.831793	0.835491	0.834486	1.2228	1.11517	1.16649	0.726929	0.811775	0.727941			572.2	0.871021	0.931959	0.903551	0.817439	0.820985	0.815515	0.938751	0.961833	0.988041	0.732622	0.757943	0.770757			144.4	0.0441	0.0487	0.017	0.0819	0.1174	0.0413	0.1114	0.1192	0.1068	0.15	0.1145	0.1394			144.4	0.0299	0.0132	0.0076	0.058
572.4	1.08043	0.960784	0.949654	0.828929	0.832857	0.831705	1.22863	1.12061	1.17303	0.723853	0.809776	0.725856			572.4	0.867832	0.928613	0.900336	0.814355	0.817934	0.812759	0.941001	0.964054	0.991154	0.729341	0.755813	0.768273			144.8	0.0444	0.0489	0.0172	0.0823	0.1187	0.0412	0.1119	0.1198	0.1075	0.1499	0.1144	0.1403			144.8	0.0294	0.0129	0.0074	0.0576
572.6	1.0771	0.958022	0.94655	0.826516	0.830714	0.829514	1.23359	1.12503	1.1783	0.72124	0.808079	0.724284			572.6	0.865321	0.925948	0.897639	0.812039	0.815623	0.810306	0.942874	0.965681	0.993651	0.726856	0.754086	0.766492			145.2	0.0445	0.0475	0.0175	0.0822	0.1171	0.0407	0.1123	0.121	0.1077	0.1489	0.1156	0.1402			145.2	0.0297	0.0125	0.0072	0.0583
572.8	1.07283	0.954393	0.942907	0.8238	0.827861	0.826667	1.23988	1.13087	1.18508	0.718207	0.806054	0.721904			572.8	0.862228	0.9228	0.894226	0.809236	0.812766	0.807481	0.94492	0.968266	0.997575	0.723448	0.75181	0.764208			145.6	0.045	0.049	0.0173	0.0821	0.1181	0.0406	0.1123	0.1208	0.1072	0.1496	0.1146	0.1405			145.6	0.0301	0.0131	0.0076	0.0582
573	1.06941	0.951388	0.940003	0.821583	0.8254	0.824589	1.24504	1.13582	1.19059	0.715722	0.804634	0.720266			573	0.859789	0.920203	0.891344	0.807035	0.810731	0.805217	0.946752	0.970511	1.00065	0.720086	0.750377	0.76231			146	0.0448	0.0485	0.0175	0.0815	0.1178	0.0397	0.1128	0.119	0.1081	0.1494	0.1159	0.1392			146	0.0296	0.0141	0.008	0.0579
573.2	1.06513	0.948167	0.936331	0.818823	0.822703	0.821732	1.25152	1.14185	1.1976	0.712386	0.802217	0.718076			573.2	0.856404	0.916888	0.888023	0.804177	0.807816	0.802404	0.948555	0.973537	1.00387	0.7165	0.748214	0.760074			146.4	0.0452	0.0496	0.017	0.0816	0.1184	0.0414	0.1116	0.1189	0.1067	0.1509	0.1149	0.1394			146.4	0.0306	0.0122	0.0076	0.0586
573.4	1.06169	0.945293	0.933441	0.816578	0.820453	0.819457	1.25673	1.14691	1.20304	0.709675	0.800267	0.716258			573.4	0.853822	0.914285	0.885354	0.801861	0.805345	0.800114	0.949896	0.97573	1.00626	0.713643	0.74697	0.758394			146.8	0.0445	0.049	0.0177	0.0828	0.1181	0.0417	0.1114	0.1203	0.1065	0.1503	0.1149	0.1398			146.8	0.0296	0.0128	0.0076	0.0583
573.6	1.05681	0.940859	0.929217	0.813131	0.816703	0.816125	1.26452	1.15453	1.21193	0.706021	0.798165	0.713515			573.6	0.850066	0.910242	0.881494	0.798282	0.801758	0.796872	0.952867	0.978636	1.00996	0.709114	0.74452	0.755266			147.2	0.0448	0.0494	0.0171	0.0822	0.1179	0.0407	0.1118	0.1198	0.1078	0.1494	0.1147	0.1401			147.2	0.0307	0.0129	0.0076	0.058
573.8	1.05284	0.937202	0.925555	0.810292	0.813774	0.813256	1.27113	1.16089	1.21918	0.703011	0.79634	0.711656			573.8	0.846818	0.906939	0.878409	0.795447	0.798839	0.794008	0.955277	0.981701	1.01384	0.705904	0.742421	0.752814			147.6	0.0447	0.0496	0.0175	0.0828	0.1189	0.0424	0.113	0.1205	0.1082	0.1492	0.1149	0.1408			147.6	0.0302	0.0126	0.008	0.0582
574	1.04961	0.934297	0.922634	0.808018	0.811599	0.810996	1.27657	1.16609	1.2252	0.700732	0.794696	0.709987			574	0.844249	0.904434	0.875789	0.793261	0.796536	0.791703	0.957379	0.984103	1.01675	0.703178	0.740703	0.750868			148	0.0453	0.0486	0.0179	0.0829	0.119	0.0408	0.1119	0.1207	0.1075	0.1492	0.1151	0.1392			148	0.0305	0.0136	0.0078	0.0588
574.2	1.04533	0.930458	0.919084	0.805187	0.808901	0.808045	1.28403	1.17297	1.2326	0.697353	0.792703	0.708349			574.2	0.840946	0.900984	0.872307	0.790254	0.793469	0.788708	0.960361	0.987523	1.02042	0.699668	0.738695	0.748688			148.4	0.0454	0.0495	0.0183	0.0831	0.1195	0.0418	0.1122	0.1202	0.1082	0.1496	0.1148	0.1396			148.4	0.0304	0.0134	0.0085	0.0589
574.4	1.04199	0.927403	0.916276	0.802868	0.806594	0.805618	1.29004	1.17839	1.23897	0.694833	0.79113	0.706984			574.4	0.838464	0.898232	0.869479	0.78781	0.791122	0.786375	0.962617	0.990223	1.02371	0.696909	0.737361	0.747055			148.8	0.046	0.05	0.0179	0.0828	0.1193	0.0415	0.1122	0.1196	0.1077	0.1491	0.1156	0.1402			148.8	0.0307	0.0136	0.0076	0.059
574.6	1.03776	0.923627	0.912435	0.800015	0.803756	0.802834	1.29715	1.18511	1.24687	0.691609	0.789033	0.70477			574.6	0.835148	0.89469	0.866047	0.785029	0.788288	0.783383	0.965068	0.993075	1.02757	0.693636	0.735294	0.744612			149.2	0.0461	0.05	0.0178	0.084	0.1189	0.0421	0.1119	0.12	0.1084	0.1504	0.1152	0.1397			149.2	0.0301	0.013	0.0072	0.0584
574.8	1.03434	0.920588	0.909508	0.797734	0.801579	0.80066	1.303	1.19028	1.25342	0.689228	0.787304	0.703121			574.8	0.832593	0.891783	0.863208	0.78258	0.786044	0.780972	0.967127	0.995698	1.03063	0.690866	0.733722	0.742488			149.6	0.0457	0.0513	0.0179	0.0834	0.1192	0.0425	0.1116	0.1207	0.108	0.1498	0.1146	0.1416			149.6	0.0307	0.013	0.0078	0.059
575	1.02935	0.916201	0.90496	0.794321	0.798164	0.797142	1.31224	1.1986	1.2634	0.685523	0.785145	0.700627			575	0.828579	0.887868	0.859107	0.778879	0.782546	0.777555	0.970955	0.999336	1.0356	0.686999	0.731507	0.739759			150	0.0449	0.0508	0.0176	0.0835	0.1197	0.0431	0.112	0.1193	0.108	0.1501	0.1139	0.1407			150	0.0309	0.0131	0.0079	0.0596
575.2	1.02512	0.912655	0.901119	0.791487	0.795419	0.794131	1.31998	1.20548	1.27154	0.682327	0.783184	0.69861			575.2	0.825378	0.884439	0.855547	0.775877	0.779562	0.774644	0.974142	1.00283	1.04015	0.683288	0.729632	0.737602			150.4	0.0468	0.0501	0.0187	0.0845	0.1183	0.0431	0.1124	0.1204	0.1075	0.1495	0.1149	0.14			150.4	0.0307	0.0136	0.0078	0.0595
575.4	1.0217	0.909807	0.898107	0.789211	0.793197	0.791658	1.32605	1.21088	1.27786	0.679744	0.781531	0.697257			575.4	0.822774	0.881612	0.852562	0.773635	0.77711	0.77228	0.976854	1.00582	1.04392	0.680225	0.72812	0.735933			150.8	0.0463	0.0506	0.0181	0.0836	0.1199	0.0425	0.1123	0.1197	0.1085	0.1485	0.1151	0.1401			150.8	0.0309	0.0136	0.0084	0.0591
575.6	1.0175	0.906024	0.894488	0.786156	0.790303	0.788649	1.33384	1.21779	1.28692	0.676591	0.779949	0.695538			575.6	0.819389	0.877887	0.849247	0.77088	0.7743	0.769249	0.979798	1.00912	1.04845	0.676788	0.726205	0.73385			151.2	0.0463	0.0507	0.0181	0.0835	0.1194	0.0436	0.1115	0.1212	0.1083	0.1486	0.115	0.1399			151.2	0.0306	0.0136	0.0081	0.0593
575.8	1.01424	0.903172	0.89161	0.78384	0.787912	0.78629	1.34044	1.22363	1.29395	0.67402	0.778444	0.693811			575.8	0.816895	0.875186	0.846593	0.768508	0.772009	0.766778	0.982199	1.01184	1.05187	0.673796	0.724421	0.731946			151.6	0.0458	0.051	0.0177	0.0838	0.1194	0.0423	0.1114	0.1194	0.1084	0.1494	0.1154	0.1401			151.6	0.0322	0.0143	0.0083	0.0596
576	1.00997	0.899447	0.888022	0.781086	0.785129	0.783401	1.34844	1.23076	1.3024	0.670812	0.77663	0.691795			576	0.813698	0.87171	0.843136	0.765558	0.769024	0.763897	0.985119	1.01497	1.05632	0.669858	0.722685	0.72944			152	0.0464	0.0513	0.0174	0.0843	0.1192	0.0428	0.1123	0.1209	0.1081	0.1498	0.1146	0.1406			152	0.0309	0.0135	0.0088	0.0603
576.2	1.00662	0.896435	0.88515	0.778845	0.782804	0.781016	1.35482	1.23638	1.3093	0.668262	0.775118	0.690363			576.2	0.811243	0.868852	0.840424	0.763219	0.76666	0.761479	0.987502	1.01753	1.05991	0.666851	0.72143	0.727563			152.4	0.0465	0.0519	0.0187	0.0844	0.1198	0.0434	0.113	0.1196	0.1076	0.1503	0.1151	0.1404			152.4	0.0316	0.0142	0.0082	0.06
576.4	1.00253	0.892885	0.881665	0.775938	0.779879	0.777968	1.36248	1.24385	1.31847	0.665158	0.773257	0.688488			576.4	0.808	0.865177	0.837221	0.760479	0.763512	0.758483	0.990718	1.02106	1.06476	0.663412	0.719294	0.725399			152.8	0.0466	0.0523	0.0184	0.0845	0.1194	0.0443	0.1134	0.1205	0.1081	0.1493	0.1152	0.1397			152.8	0.0314	0.0139	0.0081	0.0604
576.6	0.999171	0.889972	0.878807	0.773741	0.777499	0.775681	1.36878	1.24974	1.32568	0.662718	0.772116	0.686958			576.6	0.805537	0.862302	0.834733	0.758179	0.761094	0.75593	0.993708	1.02401	1.06884	0.660412	0.717486	0.72357			153.2	0.0469	0.0517	0.0192	0.0834	0.1201	0.0439	0.1122	0.12	0.1088	0.1493	0.1146	0.1399			153.2	0.0306	0.0155	0.0091	0.0601
576.8	0.9939	0.885357	0.874385	0.77046	0.774229	0.772203	1.37862	1.25816	1.33612	0.659045	0.770438	0.684575			576.8	0.801638	0.858117	0.83053	0.754651	0.757855	0.752105	0.997775	1.02821	1.07441	0.656548	0.715326	0.720891			153.6	0.047	0.0512	0.0179	0.0849	0.1209	0.0428	0.1121	0.1211	0.1079	0.149	0.1151	0.1401			153.6	0.0316	0.0141	0.009	0.0607
577	0.989747	0.881829	0.870797	0.767552	0.771424	0.769453	1.38682	1.26649	1.34533	0.656089	0.768602	0.682321			577	0.798255	0.854541	0.827255	0.751717	0.754952	0.749008	1.00083	1.03216	1.07923	0.65307	0.713407	0.718306			154	0.0467	0.0527	0.0185	0.0848	0.1207	0.0442	0.1116	0.1208	0.1081	0.1488	0.1157	0.1407			154	0.0313	0.0141	0.008	0.0608
577.2	0.986347	0.878893	0.867947	0.765222	0.769151	0.767117	1.39336	1.27273	1.35287	0.65347	0.766976	0.680547			577.2	0.79566	0.851745	0.824464	0.749379	0.752669	0.746448	1.00355	1.03521	1.08301	0.65003	0.712074	0.716633			154.4	0.0468	0.0523	0.0188	0.0853	0.1214	0.0439	0.113	0.1204	0.1088	0.1501	0.1148	0.1402			154.4	0.0319	0.0141	0.0082	0.0607
577.4	0.982083	0.87527	0.864197	0.762225	0.765919	0.764025	1.4016	1.27993	1.36259	0.650628	0.765283	0.678867			577.4	0.792561	0.848064	0.820926	0.746443	0.749883	0.743461	1.00675	1.03845	1.08812	0.646516	0.710522	0.714525			154.8	0.0467	0.0529	0.0187	0.0847	0.1195	0.0443	0.1123	0.1214	0.1082	0.1502	0.1146	0.1408			154.8	0.0321	0.013	0.0079	0.0599
577.6	0.978787	0.872407	0.861243	0.759893	0.763555	0.761663	1.4081	1.28593	1.37032	0.648332	0.763914	0.6773			577.6	0.789911	0.845236	0.81812	0.744107	0.747686	0.741064	1.00945	1.04138	1.09224	0.643711	0.709193	0.712958			155.2	0.0474	0.053	0.0186	0.0853	0.1196	0.0445	0.1132	0.1209	0.1088	0.15	0.1145	0.14			155.2	0.0323	0.0138	0.0083	0.0608
577.8	0.974548	0.86888	0.857591	0.756981	0.760512	0.758691	1.41687	1.2936	1.37929	0.64535	0.762513	0.67503			577.8	0.786655	0.84177	0.814693	0.741289	0.744552	0.738062	1.01353	1.04528	1.09682	0.640058	0.707464	0.710472			155.6	0.0468	0.053	0.0188	0.0856	0.1201	0.0438	0.1124	0.1202	0.1086	0.1488	0.115	0.1401			155.6	0.0322	0.0132	0.0087	0.0607
578	0.97113	0.866052	0.854727	0.754608	0.758157	0.756308	1.42393	1.29998	1.38651	0.642974	0.761482	0.673494			578	0.783984	0.83909	0.811916	0.738995	0.74208	0.735764	1.01672	1.04862	1.10069	0.636953	0.706011	0.708878			156	0.0483	0.0523	0.0192	0.086	0.1206	0.0443	0.1124	0.1216	0.1092	0.1494	0.115	0.1401			156	0.0325	0.0135	0.009	0.0612
578.2	0.966018	0.861729	0.850358	0.751233	0.754879	0.752875	1.43368	1.30981	1.39759	0.638772	0.759792	0.671045			578.2	0.780152	0.834727	0.807911	0.735427	0.738325	0.732233	1.0204	1.05312	1.10661	0.632102	0.703668	0.706322			156.4	0.0474	0.0537	0.0189	0.0854	0.1212	0.0452	0.1122	0.1207	0.1096	0.1493	0.1151	0.1401			156.4	0.0321	0.0139	0.0087	0.0615
578.4	0.961765	0.858076	0.846736	0.748384	0.75191	0.749882	1.44198	1.3177	1.40739	0.635619	0.758146	0.669102			578.4	0.777025	0.831117	0.804565	0.732338	0.735361	0.729179	1.02349	1.057	1.11162	0.628354	0.701721	0.704025			156.8	0.0479	0.0533	0.0187	0.0855	0.1207	0.0451	0.1129	0.1202	0.1096	0.1505	0.1158	0.1406			156.8	0.033	0.0149	0.0083	0.063
578.6	0.958397	0.855187	0.843881	0.746144	0.749354	0.747447	1.44909	1.32436	1.4154	0.63325	0.756723	0.667553			578.6	0.774473	0.828289	0.801853	0.729792	0.733093	0.726774	1.02619	1.06052	1.11558	0.625846	0.700126	0.702192			157.2	0.048	0.0539	0.0186	0.086	0.1214	0.0461	0.1125	0.1204	0.1085	0.1507	0.1151	0.1399			157.2	0.0326	0.0134	0.0083	0.0612
578.8	0.954067	0.851454	0.840194	0.743126	0.746499	0.744684	1.45771	1.33207	1.42451	0.630188	0.755544	0.665381			578.8	0.771215	0.824802	0.798568	0.726754	0.730193	0.724106	1.0297	1.06409	1.11973	0.622245	0.698903	0.699791			157.6	0.0479	0.0536	0.0197	0.0856	0.1201	0.0463	0.1132	0.1211	0.1093	0.1488	0.1151	0.1398			157.6	0.033	0.0142	0.0089	0.0621
579	0.950569	0.848451	0.837345	0.740848	0.744292	0.74252	1.46458	1.3384	1.43116	0.627652	0.754477	0.663696			579	0.768548	0.822168	0.795793	0.724221	0.727795	0.721846	1.03239	1.06727	1.12314	0.619307	0.697794	0.698043			158	0.0473	0.0541	0.019	0.0857	0.1208	0.0452	0.1115	0.1204	0.1092	0.1496	0.1146	0.141			158	0.0326	0.015	0.0093	0.0617
579.2	0.946164	0.844832	0.833789	0.738063	0.74132	0.739558	1.47301	1.34682	1.44032	0.624567	0.752759	0.661969			579.2	0.7651	0.818532	0.792219	0.721408	0.724938	0.718884	1.03585	1.07183	1.1279	0.615622	0.69593	0.695938			158.4	0.0483	0.0544	0.0189	0.0862	0.1211	0.0453	0.1119	0.1208	0.1093	0.1486	0.1153	0.1397			158.4	0.0331	0.0139	0.0089	0.0616
579.4	0.942803	0.841812	0.830923	0.735669	0.738891	0.737226	1.47972	1.35332	1.44741	0.622159	0.751468	0.660695			579.4	0.76232	0.815658	0.789584	0.719128	0.722648	0.7165	1.03867	1.07549	1.13183	0.61289	0.694385	0.694508			158.8	0.0478	0.0546	0.0195	0.0869	0.1218	0.045	0.112	0.1208	0.1097	0.1491	0.1156	0.14			158.8	0.033	0.015	0.0095	0.0623
579.6	0.938695	0.838164	0.827061	0.732847	0.735958	0.7343	1.48777	1.36131	1.4563	0.618797	0.749835	0.658648			579.6	0.758934	0.812136	0.786121	0.716191	0.719671	0.713523	1.04168	1.07963	1.13628	0.609016	0.69274	0.692538			159.2	0.0477	0.0538	0.0187	0.086	0.1207	0.046	0.1131	0.1202	0.1096	0.1496	0.1159	0.141			159.2	0.0327	0.0152	0.009	0.0628
579.8	0.935345	0.835181	0.823987	0.730502	0.733612	0.73189	1.49446	1.36744	1.46305	0.61638	0.748545	0.657158			579.8	0.756255	0.809357	0.783423	0.713835	0.717277	0.711172	1.04409	1.08267	1.13924	0.605991	0.691335	0.690948			159.6	0.0472	0.0546	0.0194	0.0871	0.1206	0.0459	0.1123	0.1213	0.1091	0.1491	0.1152	0.1419			159.6	0.0331	0.0149	0.0089	0.0632
580	0.930275	0.830969	0.819633	0.726982	0.730421	0.728216	1.50406	1.37694	1.47362	0.612505	0.746692	0.655169			580	0.752129	0.805262	0.779186	0.710231	0.71414	0.707893	1.04809	1.08689	1.14441	0.60181	0.689033	0.689035			160	0.048	0.0556	0.0191	0.0866	0.1218	0.0468	0.1134	0.1205	0.1087	0.1497	0.1151	0.1396			160	0.0329	0.0148	0.0091	0.0623
580.2	0.926081	0.827113	0.815869	0.724069	0.727535	0.725257	1.51274	1.38441	1.48279	0.609353	0.744706	0.653546			580.2	0.748896	0.801899	0.775674	0.707112	0.711099	0.705124	1.0515	1.09096	1.14919	0.598196	0.687376	0.686703			160.4	0.0482	0.0549	0.0198	0.0874	0.1213	0.0463	0.1116	0.1207	0.1088	0.1498	0.115	0.1406			160.4	0.0332	0.015	0.0087	0.0618
580.4	0.922772	0.823887	0.812848	0.721804	0.725343	0.722906	1.51956	1.39018	1.48987	0.60686	0.743318	0.652391			580.4	0.746304	0.799132	0.77276	0.704707	0.708726	0.70292	1.05408	1.09407	1.1529	0.595254	0.686083	0.685136			160.8	0.0495	0.0543	0.0199	0.0864	0.1219	0.0465	0.1123	0.1217	0.1106	0.1499	0.1144	0.1405			160.8	0.0326	0.0148	0.0094	0.0623
580.6	0.918417	0.820239	0.809223	0.718957	0.722396	0.720104	1.52753	1.39762	1.49829	0.603437	0.742057	0.650499			580.6	0.74293	0.795611	0.769519	0.701733	0.705572	0.699721	1.0575	1.09803	1.15719	0.591582	0.684186	0.683141			161.2	0.0489	0.0547	0.0199	0.0872	0.1216	0.0464	0.1113	0.1215	0.1094	0.1495	0.1152	0.1401			161.2	0.0333	0.0155	0.0098	0.0634
580.8	0.915139	0.817378	0.806351	0.716657	0.720045	0.717812	1.53413	1.40356	1.50497	0.600808	0.740899	0.648958			580.8	0.7402	0.792892	0.766876	0.69938	0.703257	0.697405	1.06007	1.10097	1.16063	0.588725	0.682735	0.681389			161.6	0.0478	0.0546	0.0193	0.0872	0.1217	0.047	0.1123	0.1211	0.1105	0.1499	0.1148	0.1408			161.6	0.0334	0.0154	0.0088	0.0633
581	0.911015	0.813608	0.802674	0.713658	0.717273	0.714717	1.54221	1.41034	1.51336	0.597957	0.739255	0.647182			581	0.737176	0.789487	0.763474	0.696407	0.700133	0.694516	1.06291	1.1042	1.16471	0.585552	0.68103	0.679132			162	0.0492	0.055	0.0201	0.087	0.1209	0.0463	0.1124	0.1207	0.1096	0.1495	0.1156	0.1399			162	0.0337	0.0153	0.0092	0.0632
581.2	0.907807	0.810641	0.799711	0.711299	0.715142	0.712279	1.54856	1.41581	1.52013	0.595431	0.737756	0.645728			581.2	0.734634	0.786695	0.760821	0.693897	0.697862	0.692088	1.06557	1.10666	1.16817	0.582791	0.679294	0.677427			162.4	0.0486	0.0557	0.0195	0.0878	0.1219	0.0473	0.1132	0.1207	0.1095	0.1485	0.1147	0.1406			162.4	0.0333	0.0151	0.0087	0.0633
581.4	0.902915	0.806406	0.795496	0.70769	0.711698	0.708769	1.55806	1.42333	1.53008	0.592031	0.735497	0.643337			581.4	0.730672	0.78257	0.756881	0.690263	0.6944	0.688503	1.06951	1.11062	1.173	0.579038	0.677075	0.674715			162.8	0.0488	0.0564	0.0199	0.0881	0.1207	0.0469	0.1125	0.1203	0.1103	0.1497	0.1159	0.1403			162.8	0.0341	0.0146	0.0099	0.063
581.6	0.898849	0.802694	0.791958	0.704675	0.708733	0.705771	1.5657	1.43034	1.53782	0.588794	0.733723	0.641529			581.6	0.727278	0.779243	0.753439	0.68743	0.691766	0.685508	1.07255	1.11448	1.17653	0.575765	0.675737	0.672772			163.2	0.0488	0.0552	0.0191	0.087	0.122	0.0481	0.113	0.121	0.1105	0.1493	0.1151	0.1399			163.2	0.0335	0.0159	0.0094	0.0624
581.8	0.895781	0.799768	0.789112	0.702204	0.706568	0.703475	1.5719	1.43574	1.54354	0.586398	0.732444	0.639864			581.8	0.72467	0.776549	0.750684	0.685158	0.689594	0.683124	1.07498	1.11714	1.17923	0.573222	0.674599	0.670993			163.6	0.0494	0.0561	0.0204	0.0875	0.1217	0.0467	0.111	0.1207	0.11	0.15	0.1147	0.1403			163.6	0.0332	0.015	0.0095	0.0644
582	0.891748	0.796258	0.785641	0.699381	0.703655	0.700678	1.57908	1.44215	1.55126	0.583133	0.730546	0.638286			582	0.721282	0.773102	0.747382	0.68237	0.686552	0.680243	1.07729	1.12024	1.18303	0.569521	0.67305	0.669272			164	0.0495	0.0565	0.0202	0.0874	0.1226	0.048	0.1123	0.1216	0.1091	0.149	0.114	0.1405			164	0.0338	0.0156	0.0098	0.0637
582.2	0.888432	0.793292	0.78304	0.69706	0.701396	0.698376	1.58494	1.44763	1.55713	0.580544	0.728898	0.636762			582.2	0.718699	0.77034	0.744708	0.680057	0.684306	0.677846	1.07935	1.1227	1.18628	0.566706	0.671636	0.667426			164.4	0.049	0.0559	0.0193	0.0875	0.1216	0.048	0.1123	0.121	0.1095	0.1498	0.114	0.1398			164.4	0.0346	0.0157	0.0092	0.0641
582.4	0.884276	0.789826	0.779426	0.694175	0.698452	0.695386	1.59203	1.45352	1.56523	0.577537	0.727293	0.634752			582.4	0.715713	0.766849	0.741367	0.677123	0.681493	0.674854	1.08252	1.12546	1.1911	0.563323	0.670185	0.664961			164.8	0.0496	0.0562	0.0205	0.0883	0.123	0.0483	0.1124	0.1204	0.1093	0.1483	0.1154	0.1408			164.8	0.0343	0.0155	0.0097	0.0643
582.6	0.880951	0.78689	0.776501	0.691853	0.696163	0.692968	1.59762	1.45812	1.57107	0.57511	0.726431	0.633178			582.6	0.713315	0.764122	0.738658	0.674734	0.679228	0.672498	1.08511	1.12724	1.1943	0.560647	0.669248	0.663203			165.2	0.0502	0.0569	0.02	0.0885	0.1219	0.0478	0.113	0.1194	0.1101	0.1495	0.1162	0.1406			165.2	0.0341	0.0146	0.0095	0.0641
582.8	0.876161	0.782852	0.772399	0.688576	0.692702	0.689615	1.6057	1.46455	1.57951	0.571976	0.724957	0.631091			582.8	0.709486	0.759849	0.734792	0.671169	0.675462	0.669057	1.08864	1.12994	1.19814	0.556873	0.667542	0.660588			165.6	0.0501	0.0569	0.0206	0.0885	0.1229	0.0476	0.1123	0.1213	0.1094	0.1491	0.1147	0.1392			165.6	0.0344	0.0155	0.0095	0.0638
583	0.872146	0.779552	0.769013	0.68564	0.689759	0.686798	1.61204	1.47023	1.5867	0.568659	0.723043	0.629277			583	0.706283	0.756573	0.731431	0.66811	0.672541	0.666063	1.09102	1.1327	1.20195	0.553103	0.66638	0.658119			166	0.0499	0.0572	0.0207	0.0875	0.1228	0.0479	0.1125	0.1212	0.1095	0.1498	0.1147	0.14			166	0.0341	0.0155	0.0099	0.0646
583.2	0.868938	0.776821	0.766417	0.683274	0.687436	0.684472	1.61753	1.475	1.59242	0.566259	0.721459	0.627921			583.2	0.703948	0.753844	0.728861	0.665593	0.670241	0.66364	1.09266	1.13487	1.2046	0.550415	0.664953	0.656506			166.4	0.0501	0.0558	0.0208	0.0886	0.123	0.0479	0.1123	0.1213	0.1107	0.1489	0.1138	0.14			166.4	0.034	0.0151	0.0095	0.065
583.4	0.86484	0.773354	0.76294	0.680303	0.684596	0.681859	1.62331	1.48043	1.60012	0.563628	0.719772	0.626074			583.4	0.700867	0.750532	0.725653	0.66263	0.667265	0.660756	1.09489	1.13755	1.20821	0.547387	0.663339	0.654914			166.8	0.0494	0.0579	0.0204	0.0886	0.1238	0.0482	0.1135	0.1215	0.1104	0.1497	0.1154	0.1405			166.8	0.035	0.0159	0.0098	0.0643
583.6	0.861566	0.770674	0.760159	0.677907	0.682169	0.679504	1.62802	1.48505	1.60576	0.561291	0.718755	0.624507			583.6	0.698323	0.747908	0.723018	0.66035	0.664988	0.658485	1.09686	1.13944	1.21073	0.544832	0.662038	0.653455			167.2	0.0498	0.0572	0.0206	0.0887	0.1224	0.0487	0.1128	0.1214	0.1097	0.1496	0.116	0.141			167.2	0.0346	0.0157	0.01	0.0641
583.8	0.85746	0.767387	0.756521	0.67506	0.679165	0.676787	1.63341	1.49002	1.61155	0.558285	0.717232	0.622288			583.8	0.695284	0.74449	0.719783	0.657337	0.662142	0.655611	1.09896	1.1418	1.214	0.541782	0.660548	0.650793			167.6	0.0506	0.0578	0.0203	0.089	0.1229	0.0494	0.1128	0.1206	0.1108	0.1495	0.1157	0.1402			167.6	0.0344	0.0159	0.0099	0.0649
584	0.854295	0.764623	0.753835	0.672773	0.676881	0.674535	1.63758	1.49429	1.61631	0.555832	0.715982	0.620385			584	0.69279	0.741808	0.717209	0.654927	0.659767	0.653552	1.10025	1.14366	1.21694	0.539118	0.659184	0.6487			168	0.0504	0.0568	0.0212	0.0894	0.122	0.0488	0.1135	0.1212	0.1101	0.1494	0.1153	0.1405			168	0.0343	0.0147	0.0102	0.0646
584.2	0.84966	0.760369	0.749668	0.669587	0.673604	0.671285	1.64381	1.50016	1.62303	0.55203	0.713778	0.618292			584.2	0.688893	0.737719	0.71323	0.651588	0.656502	0.650155	1.10244	1.14648	1.22019	0.534664	0.656323	0.646952			168.4	0.0499	0.0577	0.0206	0.0892	0.1231	0.0487	0.1129	0.1207	0.1106	0.1498	0.1152	0.1409			168.4	0.0346	0.0157	0.0105	0.0651
584.4	0.847102	0.758275	0.747438	0.667834	0.671827	0.669663	1.64682	1.50305	1.6265	0.550419	0.712767	0.617007			584.4	0.687152	0.735687	0.711235	0.650006	0.654825	0.648366	1.10309	1.14749	1.22204	0.532562	0.655246	0.646043			168.8	0.0507	0.0579	0.0209	0.0891	0.1231	0.0487	0.1126	0.1215	0.1102	0.1498	0.1151	0.1409			168.8	0.0341	0.016	0.0098	0.0654
584.6	0.842439	0.7541	0.743208	0.664441	0.668268	0.66606	1.65207	1.50917	1.63382	0.546378	0.710719	0.614824			584.6	0.683513	0.731765	0.70735	0.646569	0.651394	0.645115	1.10475	1.15027	1.22525	0.529152	0.65385	0.644025			169.2	0.05	0.0575	0.0205	0.0893	0.1235	0.049	0.1129	0.1212	0.1102	0.1493	0.1154	0.1394			169.2	0.0355	0.0164	0.011	0.0655
584.8	0.838313	0.750711	0.739624	0.661598	0.665451	0.663133	1.65668	1.51323	1.63902	0.543628	0.709188	0.612914			584.8	0.680445	0.728503	0.704115	0.643753	0.648566	0.642382	1.10654	1.15161	1.22755	0.525909	0.652351	0.642007			169.6	0.0508	0.0583	0.0201	0.0888	0.1222	0.0493	0.1119	0.1215	0.1108	0.15	0.1156	0.1401			169.6	0.0356	0.017	0.01	0.0656
585	0.835238	0.74801	0.736968	0.659422	0.663261	0.660945	1.66032	1.51644	1.64299	0.54156	0.707659	0.611343			585	0.678043	0.725783	0.701487	0.64146	0.646178	0.640315	1.10787	1.15235	1.22945	0.523445	0.650745	0.639941			170	0.0508	0.0588	0.0211	0.0898	0.1239	0.0502	0.1127	0.1214	0.1105	0.1494	0.1137	0.1401			170	0.0351	0.0155	0.0101	0.0647
585.2	0.831179	0.74468	0.733363	0.656586	0.660417	0.658201	1.66446	1.52048	1.64755	0.53886	0.70577	0.609327			585.2	0.674923	0.722541	0.698374	0.638606	0.643222	0.637424	1.10902	1.1543	1.23181	0.520507	0.648685	0.63774			170.4	0.0508	0.0583	0.0215	0.0891	0.1222	0.0498	0.1136	0.1214	0.1101	0.1496	0.1158	0.1403			170.4	0.0357	0.0163	0.0103	0.0656
585.4	0.827994	0.741939	0.730463	0.654427	0.65811	0.655871	1.66742	1.52387	1.65124	0.536825	0.704269	0.607698			585.4	0.672483	0.719942	0.695838	0.636383	0.641027	0.635095	1.10985	1.15584	1.23366	0.518494	0.647108	0.636106			170.8	0.0508	0.0584	0.0214	0.0892	0.1233	0.0505	0.112	0.1203	0.1105	0.1497	0.1151	0.1409			170.8	0.0351	0.0166	0.0095	0.0658
585.6	0.823386	0.738048	0.726105	0.650994	0.654692	0.65234	1.67185	1.52833	1.65627	0.533358	0.702119	0.605328			585.6	0.668868	0.716031	0.692209	0.633117	0.637495	0.631604	1.11012	1.15738	1.23536	0.514953	0.644628	0.633479			171.2	0.051	0.0586	0.0214	0.0887	0.1232	0.0496	0.1119	0.1208	0.1102	0.1494	0.1148	0.1405			171.2	0.0348	0.0161	0.0107	0.0661
585.8	0.82117	0.736083	0.724121	0.649229	0.652919	0.6507	1.67392	1.53007	1.65904	0.53188	0.70118	0.604234			585.8	0.666993	0.714087	0.690425	0.631431	0.635777	0.63002	1.11075	1.15822	1.23616	0.513352	0.643951	0.632415			171.6	0.0519	0.0574	0.0213	0.0903	0.1226	0.0501	0.1125	0.1218	0.1108	0.1502	0.1154	0.1397			171.6	0.0352	0.0171	0.0107	0.0655
586	0.816674	0.73201	0.719882	0.646044	0.649643	0.647365	1.67835	1.53469	1.66437	0.528207	0.697928	0.601809			586	0.663404	0.710003	0.68664	0.627846	0.632377	0.626564	1.11142	1.15975	1.23839	0.509333	0.641043	0.630599			172	0.0506	0.0586	0.021	0.0894	0.1231	0.0503	0.1124	0.1214	0.1102	0.148	0.1162	0.1409			172	0.0359	0.0167	0.0102	0.0656
586.2	0.812559	0.728611	0.716357	0.643155	0.646732	0.644521	1.68188	1.53806	1.66813	0.525506	0.695952	0.599631			586.2	0.660478	0.706743	0.683329	0.62501	0.629539	0.623833	1.11217	1.16099	1.2395	0.506684	0.638828	0.628732			172.4	0.0521	0.0596	0.0216	0.0904	0.1239	0.05	0.1124	0.1217	0.1093	0.1493	0.1154	0.1403			172.4	0.0363	0.016	0.0109	0.0658
586.4	0.809414	0.725855	0.713468	0.640905	0.644389	0.642331	1.68435	1.54032	1.67059	0.523708	0.69446	0.598292			586.4	0.658042	0.704128	0.680803	0.622804	0.627247	0.621597	1.11278	1.16169	1.24051	0.504769	0.637064	0.627221			172.8	0.0514	0.06	0.0211	0.0892	0.1232	0.0504	0.1123	0.1213	0.109	0.1503	0.1151	0.1392			172.8	0.036	0.0163	0.0102	0.0665
586.6	0.805686	0.722248	0.710108	0.638047	0.641714	0.639493	1.68702	1.54302	1.67331	0.520985	0.692516	0.596254			586.6	0.654979	0.700702	0.677811	0.620217	0.624394	0.618918	1.11312	1.16242	1.24185	0.501972	0.635317	0.624725			173.2	0.0513	0.0598	0.0219	0.0897	0.1233	0.0512	0.1128	0.1208	0.1101	0.1495	0.1152	0.1405			173.2	0.036	0.0172	0.0091	0.0663
586.8	0.802556	0.719477	0.707544	0.635798	0.639421	0.63718	1.68926	1.54473	1.67514	0.518663	0.690972	0.594583			586.8	0.652624	0.698042	0.675256	0.61806	0.622206	0.616845	1.11343	1.16245	1.24236	0.499496	0.634131	0.622669			173.6	0.0514	0.0594	0.0214	0.0894	0.1235	0.0514	0.1128	0.1221	0.1109	0.1507	0.1147	0.1411			173.6	0.035	0.0167	0.011	0.0668
587	0.79798	0.715386	0.703447	0.632365	0.636266	0.633755	1.69223	1.54754	1.67811	0.515307	0.688017	0.592477			587	0.64895	0.693963	0.671629	0.614747	0.618869	0.61349	1.11336	1.16295	1.24307	0.495578	0.631852	0.620115			174	0.0508	0.0595	0.0211	0.0903	0.1231	0.0505	0.1127	0.1211	0.1101	0.1498	0.1154	0.14			174	0.0354	0.0171	0.0099	0.0663
587.2	0.795616	0.713394	0.701449	0.630697	0.634508	0.632069	1.69368	1.54884	1.67965	0.51352	0.686156	0.59136			587.2	0.647171	0.692163	0.669733	0.613092	0.617197	0.611818	1.11321	1.16339	1.2429	0.493406	0.630342	0.618984			174.4	0.0518	0.0591	0.0217	0.0905	0.1234	0.0511	0.1132	0.1225	0.1106	0.1494	0.1162	0.1404			174.4	0.0361	0.0174	0.0108	0.0673
587.4	0.79107	0.709203	0.697483	0.6272	0.631171	0.628679	1.69616	1.55068	1.68193	0.510676	0.683699	0.589315			587.4	0.643528	0.688411	0.66616	0.60979	0.614068	0.608418	1.11328	1.16329	1.24325	0.490016	0.628179	0.616792			174.8	0.0519	0.0601	0.0217	0.0909	0.123	0.051	0.1125	0.122	0.1109	0.1501	0.1155	0.1405			174.8	0.0359	0.016	0.0108	0.0666
587.6	0.787382	0.705933	0.694359	0.624373	0.628305	0.625858	1.69789	1.55184	1.68338	0.50825	0.681544	0.587118			587.6	0.640628	0.685351	0.663204	0.607062	0.611153	0.605664	1.11372	1.16321	1.24373	0.487424	0.626413	0.61405			175.2	0.0514	0.0604	0.0219	0.09	0.1235	0.0517	0.113	0.1218	0.1101	0.1496	0.1158	0.1403			175.2	0.0363	0.0167	0.0105	0.0671
587.8	0.784406	0.703329	0.69181	0.622159	0.626079	0.623725	1.69888	1.55273	1.68434	0.506001	0.679983	0.585387			587.8	0.638119	0.682819	0.66063	0.604891	0.608811	0.603398	1.11356	1.16349	1.24397	0.485132	0.624644	0.612113			175.6	0.0519	0.0607	0.0216	0.091	0.1236	0.0519	0.1119	0.1207	0.1106	0.1489	0.1158	0.141			175.6	0.036	0.0167	0.0104	0.0675
588	0.78058	0.699995	0.688408	0.619574	0.623339	0.621105	1.69983	1.55344	1.68514	0.503509	0.677622	0.582742			588	0.635087	0.679711	0.657503	0.60201	0.606092	0.600475	1.11243	1.16318	1.24351	0.482217	0.621992	0.609172			176	0.0524	0.0607	0.0221	0.0906	0.1244	0.052	0.1124	0.1223	0.1108	0.1496	0.1152	0.1403			176	0.0354	0.0169	0.0109	0.0677
588.2	0.777662	0.697324	0.685834	0.61731	0.620987	0.619047	1.70028	1.55412	1.68587	0.501054	0.675558	0.581121			588.2	0.632738	0.677343	0.654944	0.599676	0.603944	0.598201	1.11164	1.16324	1.24266	0.479863	0.619776	0.607464			176.4	0.0519	0.0601	0.0212	0.0907	0.1233	0.0516	0.1119	0.1217	0.1106	0.1497	0.1146	0.1407			176.4	0.0363	0.0163	0.0099	0.0668
588.4	0.773036	0.693085	0.681731	0.613941	0.617738	0.615579	1.70084	1.55552	1.68714	0.498274	0.673702	0.57876			588.4	0.629128	0.673567	0.651205	0.596415	0.600548	0.594796	1.11008	1.1629	1.24195	0.477044	0.617531	0.604972			176.8	0.0521	0.0601	0.0228	0.0913	0.1242	0.0521	0.1128	0.122	0.11	0.1498	0.116	0.141			176.8	0.0366	0.0181	0.0108	0.067
588.6	0.770711	0.690985	0.679884	0.612203	0.616149	0.61399	1.70088	1.55588	1.68697	0.496766	0.67255	0.577775			588.6	0.627336	0.671727	0.649206	0.594768	0.598716	0.593036	1.10988	1.16244	1.24215	0.475576	0.616789	0.603617			177.2	0.0528	0.0615	0.0218	0.0918	0.123	0.052	0.1134	0.1214	0.1111	0.1488	0.1153	0.1407			177.2	0.0371	0.0178	0.0109	0.067
588.8	0.76627	0.686961	0.676172	0.608681	0.613017	0.610615	1.70079	1.55531	1.68725	0.494319	0.669826	0.575126			588.8	0.623887	0.668056	0.645589	0.591301	0.595514	0.589916	1.10969	1.16088	1.24189	0.472586	0.613963	0.600796			177.6	0.0526	0.0611	0.0227	0.0905	0.1234	0.0514	0.1128	0.1223	0.1111	0.1484	0.1161	0.1407			177.6	0.0369	0.0172	0.0112	0.0679
589	0.762589	0.683619	0.673003	0.605965	0.610092	0.607817	1.70051	1.55458	1.68721	0.491724	0.668383	0.573028			589	0.620703	0.66492	0.642458	0.588466	0.592582	0.587216	1.10878	1.15976	1.24065	0.470492	0.611922	0.598917			178	0.0528	0.0613	0.0218	0.0899	0.1239	0.0529	0.113	0.1207	0.1111	0.1507	0.1151	0.1408			178	0.037	0.0172	0.0112	0.068
589.2	0.759694	0.68107	0.670426	0.603722	0.607768	0.605502	1.70017	1.55417	1.68681	0.489563	0.666741	0.571505			589.2	0.618328	0.662435	0.639927	0.586158	0.590306	0.585068	1.10782	1.15868	1.23935	0.468631	0.609984	0.597279			178.4	0.0525	0.061	0.0223	0.0912	0.1247	0.0521	0.1121	0.1224	0.1106	0.1496	0.1154	0.1406			178.4	0.0368	0.0165	0.0101	0.0686
589.4	0.755838	0.677599	0.667416	0.600919	0.605168	0.602659	1.69948	1.55282	1.68581	0.487525	0.664077	0.569338			589.4	0.615253	0.659463	0.636898	0.58348	0.587515	0.582399	1.10643	1.15723	1.23774	0.466263	0.607828	0.594407			178.8	0.0528	0.0606	0.0226	0.0915	0.1257	0.0529	0.1126	0.1213	0.1098	0.1491	0.1159	0.1408			178.8	0.0368	0.0168	0.0116	0.0675
589.6	0.752987	0.674901	0.664788	0.598721	0.603038	0.600456	1.6989	1.55203	1.68505	0.485753	0.661778	0.567917			589.6	0.612889	0.656996	0.634578	0.581283	0.585425	0.580308	1.10527	1.15604	1.23682	0.464024	0.605761	0.592387			179.2	0.0522	0.0614	0.0228	0.0918	0.1247	0.0529	0.1122	0.1222	0.1107	0.1498	0.1158	0.1401			179.2	0.0374	0.0175	0.0109	0.068
589.8	0.74847	0.670984	0.660788	0.595433	0.599734	0.597035	1.69729	1.54943	1.68354	0.482844	0.659544	0.564636			589.8	0.60931	0.653231	0.630852	0.578009	0.58219	0.577039	1.10281	1.15296	1.23492	0.460874	0.603197	0.589675			179.6	0.053	0.0619	0.022	0.0919	0.1242	0.0524	0.1133	0.1225	0.1106	0.15	0.1159	0.141			179.6	0.0381	0.0174	0.0116	0.0679
590	0.746386	0.669048	0.658823	0.593811	0.598123	0.595438	1.6966	1.54843	1.68226	0.481615	0.65828	0.563231			590	0.607547	0.651457	0.628988	0.576249	0.580519	0.575302	1.10178	1.15179	1.23385	0.459757	0.601817	0.588795			180	0.0532	0.0622	0.0221	0.0915	0.1238	0.0526	0.113	0.1227	0.1109	0.1507	0.1147	0.1409			180	0.0369	0.0172	0.0119	0.0686
590.2	0.741856	0.665155	0.654886	0.590638	0.594696	0.592043	1.69433	1.54616	1.67978	0.479246	0.655514	0.560437			590.2	0.604051	0.647432	0.62532	0.572971	0.577294	0.571968	1.09923	1.14924	1.23148	0.457229	0.598926	0.586453			180.4	0.0534	0.062	0.0222	0.0916	0.1247	0.0532	0.1127	0.1213	0.11	0.1493	0.116	0.1407			180.4	0.0373	0.0171	0.0115	0.0681
590.4	0.738199	0.661882	0.651753	0.588003	0.591988	0.589177	1.69208	1.54406	1.67786	0.477313	0.653723	0.558388			590.4	0.601114	0.644292	0.622263	0.570323	0.574477	0.569273	1.09745	1.14767	1.22945	0.455206	0.596292	0.584194			180.8	0.053	0.0625	0.0232	0.0921	0.124	0.053	0.1129	0.1212	0.1105	0.1498	0.116	0.1399			180.8	0.0377	0.0163	0.0107	0.0687
590.6	0.735159	0.659226	0.649089	0.585889	0.589829	0.586915	1.69017	1.54233	1.67607	0.475946	0.652509	0.556841			590.6	0.598756	0.641688	0.619781	0.568204	0.572214	0.567116	1.09591	1.14625	1.22817	0.453519	0.594899	0.582009			181.2	0.0533	0.062	0.0221	0.091	0.1243	0.0535	0.1122	0.1211	0.1113	0.1494	0.1162	0.1408			181.2	0.0373	0.0173	0.0109	0.0686
590.8	0.731374	0.655976	0.64579	0.582956	0.587093	0.584192	1.68757	1.53973	1.67351	0.473585	0.649756	0.55468			590.8	0.595917	0.638461	0.616508	0.565334	0.569397	0.564508	1.09316	1.14334	1.22549	0.451457	0.592304	0.579372			181.6	0.0536	0.0621	0.0233	0.0916	0.1248	0.0534	0.1125	0.1222	0.1109	0.1507	0.1145	0.1407			181.6	0.0372	0.0185	0.0112	0.0682
591	0.728356	0.653417	0.643116	0.58067	0.584982	0.582051	1.68525	1.53787	1.67142	0.472095	0.647882	0.553182			591	0.593553	0.635798	0.613951	0.562925	0.567215	0.562313	1.0905	1.14083	1.22319	0.449698	0.59039	0.577306			182	0.0535	0.062	0.0229	0.0922	0.1248	0.0539	0.1125	0.1223	0.1113	0.1495	0.1142	0.1403			182	0.0368	0.0177	0.0115	0.0689
591.2	0.72384	0.649642	0.639467	0.577243	0.581685	0.578646	1.68126	1.53403	1.66843	0.469863	0.644271	0.551248			591.2	0.590068	0.631846	0.610084	0.559871	0.564013	0.559214	1.08712	1.13727	1.22066	0.446905	0.58781	0.574201			182.4	0.0544	0.0628	0.0234	0.0924	0.124	0.0533	0.1125	0.1212	0.1095	0.15	0.1156	0.1407			182.4	0.0374	0.0178	0.0114	0.0693
591.4	0.720113	0.646437	0.636232	0.574605	0.579013	0.575838	1.67798	1.53121	1.66537	0.468075	0.641299	0.549298			591.4	0.587275	0.628599	0.607109	0.557313	0.561355	0.556639	1.08426	1.13469	1.21819	0.444439	0.585773	0.572303			182.8	0.0531	0.0629	0.0221	0.0918	0.1241	0.0537	0.113	0.1208	0.1119	0.1501	0.1147	0.1407			182.8	0.0376	0.018	0.0115	0.0689
591.6	0.717188	0.643818	0.633553	0.572476	0.576729	0.573568	1.6747	1.52806	1.66315	0.466754	0.639187	0.547567			591.6	0.585068	0.625934	0.604746	0.555179	0.559108	0.554478	1.08183	1.13198	1.21622	0.442535	0.584311	0.570615			183.2	0.0538	0.0633	0.023	0.0914	0.1237	0.0536	0.1115	0.1217	0.1104	0.149	0.1159	0.1402			183.2	0.0378	0.0181	0.0117	0.0698
591.8	0.713561	0.640728	0.63043	0.569867	0.573849	0.570884	1.67076	1.52408	1.65986	0.464604	0.636932	0.545513			591.8	0.582267	0.622802	0.601711	0.552335	0.556442	0.551922	1.07817	1.12889	1.21319	0.439938	0.581899	0.568537			183.6	0.0545	0.0634	0.0234	0.0925	0.1244	0.0546	0.1127	0.1211	0.1109	0.1499	0.1153	0.1399			183.6	0.0372	0.0169	0.0105	0.0691
592	0.71064	0.638097	0.627866	0.567782	0.571572	0.56871	1.6674	1.52092	1.6569	0.463161	0.634649	0.543524			592	0.579998	0.62022	0.599333	0.550249	0.554408	0.549834	1.07519	1.12605	1.20991	0.438064	0.579523	0.566513			184	0.0542	0.0647	0.023	0.0931	0.1238	0.0542	0.1129	0.1212	0.1113	0.1502	0.1159	0.1408			184	0.0379	0.0173	0.0116	0.0691
592.2	0.707079	0.634839	0.6245	0.565021	0.568801	0.566126	1.66302	1.51701	1.65237	0.461343	0.632311	0.541296			592.2	0.577122	0.617005	0.596336	0.547683	0.551828	0.54705	1.07121	1.12228	1.20565	0.435523	0.577135	0.56438			184.4	0.0543	0.0634	0.0227	0.092	0.1243	0.0535	0.113	0.1212	0.112	0.1497	0.1149	0.1403			184.4	0.0376	0.0184	0.0114	0.0691
592.4	0.704046	0.63222	0.621849	0.562804	0.566665	0.564011	1.65929	1.51421	1.64842	0.460048	0.630139	0.539593			592.4	0.574821	0.614505	0.593991	0.545546	0.549775	0.544779	1.06827	1.11922	1.20271	0.43371	0.575264	0.562453			184.8	0.0546	0.0632	0.0227	0.0929	0.1252	0.0547	0.113	0.1219	0.1115	0.148	0.1162	0.1405			184.8	0.0385	0.0188	0.0116	0.0699
592.6	0.699839	0.628473	0.617873	0.559532	0.563604	0.560853	1.65266	1.50884	1.64255	0.457801	0.627295	0.537273			592.6	0.57149	0.610737	0.59049	0.542708	0.546689	0.541422	1.06321	1.11438	1.19859	0.431109	0.572771	0.559531			185.2	0.0542	0.0635	0.0233	0.0925	0.1242	0.0543	0.1127	0.1218	0.1109	0.1502	0.1146	0.1409			185.2	0.0382	0.0179	0.0121	0.0697
592.8	0.696265	0.625217	0.614789	0.556818	0.560883	0.558073	1.64714	1.50342	1.63763	0.455571	0.625176	0.534763			592.8	0.568603	0.607737	0.587336	0.540002	0.543922	0.538769	1.05912	1.11016	1.19481	0.42861	0.570454	0.556578			185.6	0.054	0.0647	0.0239	0.0938	0.1245	0.0555	0.1115	0.1228	0.1106	0.15	0.1156	0.1403			185.6	0.0384	0.0176	0.0115	0.0702
593	0.693418	0.622656	0.612313	0.554616	0.558692	0.555796	1.64245	1.49893	1.63341	0.453717	0.62284	0.532863			593	0.566202	0.605264	0.58493	0.537792	0.541717	0.536565	1.05588	1.10711	1.19107	0.426923	0.568046	0.554551			186	0.0543	0.0639	0.0239	0.0928	0.1245	0.0547	0.1136	0.1206	0.1109	0.1502	0.1153	0.141			186	0.0377	0.0183	0.0116	0.0697
593.2	0.689729	0.619479	0.609216	0.551655	0.556065	0.552958	1.63715	1.49411	1.62822	0.451369	0.619979	0.530771			593.2	0.56323	0.602236	0.581873	0.535059	0.539082	0.533895	1.05213	1.10362	1.18658	0.42473	0.565557	0.552076			186.4	0.0549	0.064	0.0235	0.0928	0.1242	0.0558	0.1126	0.1221	0.111	0.1495	0.1161	0.1402			186.4	0.0388	0.017	0.0122	0.0698
593.4	0.686737	0.616931	0.606761	0.549342	0.553959	0.550673	1.63238	1.48974	1.62412	0.449517	0.617726	0.529041			593.4	0.560858	0.599903	0.579564	0.532974	0.536987	0.531721	1.04879	1.10034	1.18307	0.422671	0.563495	0.550056			186.8	0.0554	0.064	0.024	0.0937	0.1256	0.0549	0.113	0.1218	0.1108	0.1503	0.1149	0.1405			186.8	0.0378	0.0181	0.0117	0.0695
593.6	0.682522	0.613089	0.603051	0.546232	0.550752	0.547457	1.62561	1.48352	1.61696	0.447606	0.615548	0.526407			593.6	0.557444	0.596354	0.576041	0.529758	0.53381	0.528568	1.04396	1.09508	1.17796	0.420361	0.561487	0.54721			187.2	0.0551	0.064	0.0234	0.0935	0.1238	0.055	0.1129	0.1224	0.111	0.1489	0.1155	0.1401			187.2	0.0381	0.0183	0.0114	0.071
593.8	0.680364	0.611213	0.601204	0.544494	0.549046	0.54578	1.62226	1.48034	1.61328	0.446401	0.613729	0.524989			593.8	0.555712	0.594499	0.574151	0.528152	0.532293	0.526912	1.04128	1.09179	1.175	0.419126	0.56002	0.545839			187.6	0.0551	0.064	0.0237	0.0932	0.1248	0.0556	0.1123	0.1212	0.1104	0.1503	0.115	0.1406			187.6	0.0391	0.0184	0.0126	0.0702
594	0.67608	0.607487	0.597319	0.541284	0.545815	0.542474	1.61459	1.47283	1.60602	0.444523	0.610129	0.522289			594	0.552101	0.590739	0.570638	0.524942	0.52924	0.523591	1.0354	1.08614	1.16898	0.416789	0.556298	0.543396			188	0.0549	0.0648	0.0238	0.0934	0.1247	0.0558	0.113	0.1213	0.1113	0.1492	0.1153	0.1402			188	0.0383	0.0189	0.012	0.0706
594.2	0.672464	0.604458	0.594264	0.53874	0.543099	0.539829	1.60778	1.46635	1.59942	0.442942	0.60755	0.519603			594.2	0.549335	0.587659	0.567771	0.522224	0.526561	0.520945	1.03139	1.08161	1.16341	0.414575	0.553664	0.540907			188.4	0.0544	0.0644	0.0237	0.0931	0.1249	0.0564	0.1126	0.1223	0.1109	0.1497	0.1166	0.1409			188.4	0.0383	0.0184	0.0112	0.0705
594.4	0.669655	0.601922	0.591726	0.536674	0.541014	0.53758	1.60265	1.46111	1.59414	0.441127	0.605314	0.517561			594.4	0.547127	0.585298	0.565407	0.520021	0.524409	0.518898	1.02813	1.07773	1.15904	0.412787	0.551466	0.539362			188.8	0.0546	0.0654	0.0238	0.0934	0.1247	0.0559	0.1132	0.1223	0.1107	0.1498	0.1152	0.1412			188.8	0.0381	0.0183	0.0116	0.0703
594.6	0.666239	0.598643	0.588489	0.534033	0.538454	0.535022	1.59583	1.45458	1.5869	0.439127	0.603123	0.514908			594.6	0.544243	0.582277	0.562529	0.517288	0.521633	0.516135	1.02318	1.0727	1.15357	0.411042	0.54888	0.536536			189.2	0.0553	0.0653	0.0243	0.0938	0.1252	0.0568	0.1129	0.1207	0.1114	0.1494	0.1159	0.1402			189.2	0.039	0.0183	0.0124	0.0703
594.8	0.663438	0.595956	0.586033	0.531897	0.536235	0.532935	1.59039	1.44867	1.58073	0.437874	0.601228	0.512861			594.8	0.541881	0.579855	0.560238	0.515218	0.519444	0.513955	1.01907	1.06829	1.14912	0.409899	0.546596	0.534299			189.6	0.0547	0.0656	0.0235	0.0931	0.1254	0.0561	0.1132	0.1219	0.111	0.1483	0.1144	0.1409			189.6	0.0383	0.0183	0.0117	0.0713
595	0.659113	0.592135	0.582373	0.528822	0.533121	0.529696	1.58163	1.44093	1.5711	0.43564	0.597836	0.509763			595	0.538302	0.576056	0.556613	0.511991	0.516194	0.510741	1.01399	1.06171	1.14221	0.407353	0.543304	0.531194			190	0.0561	0.0654	0.025	0.0938	0.1251	0.0564	0.1122	0.1223	0.1113	0.1504	0.1154	0.1403			190	0.0399	0.0189	0.0117	0.0708
595.2	0.656919	0.590408	0.580527	0.527291	0.531731	0.528166	1.57743	1.43694	1.56685	0.43419	0.596591	0.508296			595.2	0.536568	0.574135	0.554949	0.510385	0.514452	0.509208	1.0111	1.05855	1.13897	0.406096	0.542075	0.530327			190.4	0.0556	0.0651	0.0246	0.094	0.1265	0.0577	0.112	0.1223	0.1105	0.1491	0.115	0.1406			190.4	0.0389	0.0187	0.0131	0.0715
595.4	0.65265	0.586555	0.576802	0.523961	0.528766	0.524978	1.56889	1.42854	1.55841	0.432031	0.593058	0.50603			595.4	0.533217	0.570336	0.551269	0.506997	0.511334	0.506041	1.00597	1.05282	1.13269	0.403883	0.539032	0.527673			190.8	0.0553	0.0658	0.0236	0.0944	0.1263	0.0571	0.1121	0.1222	0.1111	0.1502	0.1157	0.1417			190.8	0.0391	0.0192	0.0112	0.0705
595.6	0.649085	0.583377	0.57377	0.52137	0.526146	0.522356	1.56132	1.42066	1.55108	0.430182	0.590256	0.503694			595.6	0.530496	0.56728	0.548266	0.504383	0.508773	0.503532	1.00132	1.04764	1.12734	0.401829	0.53656	0.524899			191.2	0.0557	0.0659	0.0241	0.0941	0.1251	0.0561	0.1127	0.1222	0.1117	0.1497	0.1162	0.1406			191.2	0.0391	0.0182	0.0119	0.0712
595.8	0.646299	0.580818	0.571218	0.51932	0.523869	0.520138	1.55538	1.41465	1.54478	0.42853	0.587705	0.501423			595.8	0.528221	0.564837	0.54592	0.502325	0.506674	0.501488	0.997357	1.04325	1.12281	0.400242	0.534085	0.522614			191.6	0.055	0.0648	0.0246	0.0942	0.1257	0.0566	0.1127	0.1218	0.1115	0.1496	0.1156	0.1414			191.6	0.039	0.0178	0.0126	0.0713
596	0.642736	0.577625	0.568266	0.516679	0.521047	0.517389	1.54723	1.40741	1.53681	0.426461	0.584503	0.49894			596	0.525179	0.561951	0.543062	0.499777	0.50403	0.498989	0.99191	1.03747	1.11718	0.398483	0.531161	0.520648			192	0.0564	0.0667	0.024	0.0948	0.125	0.0566	0.113	0.1224	0.1121	0.1485	0.1156	0.1406			192	0.0389	0.0193	0.0117	0.0719
596.2	0.639926	0.575092	0.565823	0.514675	0.518964	0.515263	1.54049	1.40196	1.53031	0.425035	0.581929	0.497052			596.2	0.522919	0.559463	0.540809	0.497814	0.501832	0.496977	0.987872	1.03325	1.11214	0.397065	0.529164	0.518925			192.4	0.0557	0.0654	0.024	0.0941	0.1252	0.0572	0.1127	0.1216	0.1106	0.1494	0.1153	0.1405			192.4	0.0391	0.0192	0.0128	0.0719
596.4	0.635688	0.571511	0.562049	0.511656	0.515745	0.512245	1.53043	1.39294	1.52014	0.423074	0.579174	0.494242			596.4	0.519562	0.556011	0.537489	0.494777	0.498764	0.493855	0.982143	1.02627	1.10502	0.39524	0.526597	0.515774			192.8	0.0558	0.0667	0.0239	0.0942	0.1249	0.0573	0.1126	0.1219	0.1106	0.1492	0.1151	0.1411			192.8	0.0401	0.0188	0.0117	0.072
596.6	0.632274	0.568423	0.558958	0.509098	0.513118	0.50973	1.52206	1.3853	1.51152	0.421568	0.57621	0.492104			596.6	0.516702	0.552926	0.534522	0.492221	0.496055	0.491257	0.976914	1.02052	1.09872	0.393608	0.523562	0.512956			193.2	0.0554	0.0663	0.0252	0.0938	0.1252	0.0575	0.113	0.1227	0.1116	0.1501	0.1162	0.1411			193.2	0.0388	0.0186	0.0121	0.0713
596.8	0.629597	0.565981	0.556465	0.506972	0.510979	0.507742	1.51525	1.37937	1.50491	0.420281	0.573742	0.490437			596.8	0.514446	0.550588	0.532078	0.490092	0.494061	0.489245	0.97255	1.016	1.09357	0.391948	0.520958	0.510759			193.6	0.0562	0.0666	0.025	0.0943	0.1252	0.0568	0.1127	0.1218	0.112	0.1494	0.1163	0.1408			193.6	0.0393	0.0189	0.0131	0.0719
597	0.626178	0.562921	0.553372	0.504456	0.508331	0.505228	1.50585	1.37082	1.49631	0.41827	0.570959	0.487956			597	0.511753	0.547535	0.529302	0.487636	0.491419	0.486851	0.966389	1.00981	1.08705	0.390212	0.51841	0.50813			194	0.0564	0.0664	0.0249	0.0948	0.1253	0.0567	0.1132	0.1221	0.111	0.1494	0.1155	0.1415			194	0.0394	0.0185	0.0125	0.0713
597.2	0.623452	0.560522	0.55097	0.502406	0.506294	0.503255	1.49865	1.36423	1.4889	0.41664	0.569192	0.486149			597.2	0.509618	0.545217	0.527104	0.485535	0.489307	0.484861	0.961835	1.00506	1.08191	0.388942	0.516827	0.506002			194.4	0.0563	0.0668	0.0249	0.0952	0.1255	0.0576	0.1133	0.1222	0.1113	0.1496	0.1159	0.1408			194.4	0.0399	0.0187	0.0127	0.0716
597.4	0.619585	0.556838	0.547274	0.499397	0.50315	0.500124	1.48781	1.35508	1.47801	0.413662	0.565282	0.482806			597.4	0.506449	0.541866	0.523846	0.482569	0.48637	0.481663	0.955283	0.998596	1.07454	0.38717	0.513829	0.5022			194.8	0.056	0.0662	0.0246	0.0955	0.1265	0.0578	0.1132	0.1223	0.1115	0.1499	0.1145	0.1405			194.8	0.0404	0.0197	0.0119	0.0726
597.6	0.617501	0.554962	0.545375	0.497779	0.501606	0.498609	1.48212	1.35056	1.47268	0.412928	0.563592	0.481143			597.6	0.504697	0.540207	0.522228	0.481133	0.484977	0.480168	0.952059	0.995133	1.07031	0.386347	0.512484	0.500465			195.2	0.056	0.0674	0.0251	0.0951	0.1259	0.0581	0.1139	0.1232	0.1115	0.1496	0.1152	0.1411			195.2	0.0402	0.0196	0.0125	0.0725
597.8	0.613514	0.551351	0.541965	0.494605	0.4982	0.495408	1.47125	1.34082	1.46106	0.410651	0.560068	0.478702			597.8	0.501723	0.53685	0.518892	0.478005	0.482074	0.477238	0.945946	0.988104	1.0621	0.384272	0.509572	0.49786			195.6	0.0561	0.0666	0.025	0.0947	0.1257	0.0581	0.1124	0.1221	0.1115	0.1497	0.1164	0.1403			195.6	0.0399	0.0186	0.0123	0.072
598	0.610109	0.548545	0.53895	0.491908	0.495738	0.492855	1.46191	1.33207	1.45219	0.408479	0.557368	0.476386			598	0.499141	0.53402	0.516097	0.475354	0.479417	0.474666	0.940824	0.981943	1.05599	0.382492	0.50683	0.495587			196	0.0578	0.0676	0.0255	0.0942	0.1253	0.0589	0.113	0.122	0.1116	0.1497	0.1159	0.1405			196	0.0399	0.0195	0.012	0.0723
598.2	0.607489	0.54621	0.536636	0.489804	0.49375	0.490923	1.45435	1.32533	1.44516	0.406838	0.554913	0.474853			598.2	0.496959	0.531694	0.513925	0.473435	0.477394	0.472566	0.93631	0.977233	1.05123	0.381327	0.504518	0.493772			196.4	0.0569	0.0668	0.0251	0.0952	0.1244	0.0573	0.1128	0.1214	0.1124	0.1495	0.1151	0.1405			196.4	0.0402	0.0197	0.0133	0.0727
598.4	0.604144	0.543372	0.533745	0.487061	0.491165	0.488313	1.44443	1.31702	1.43551	0.404623	0.551502	0.472409			598.4	0.49427	0.528933	0.511208	0.470964	0.474908	0.470112	0.930147	0.971307	1.04461	0.379558	0.501481	0.491226			196.8	0.0568	0.0673	0.025	0.0955	0.1254	0.0577	0.1133	0.1221	0.1112	0.1499	0.1159	0.1411			196.8	0.0398	0.02	0.0126	0.0734
598.6	0.601677	0.54094	0.531419	0.48488	0.489047	0.486169	1.43637	1.3104	1.42764	0.402924	0.548985	0.470482			598.6	0.492128	0.526711	0.509008	0.468909	0.472959	0.468014	0.925251	0.966769	1.03924	0.378221	0.499349	0.48894			197.2	0.0568	0.0666	0.0256	0.0951	0.1258	0.0583	0.113	0.1217	0.112	0.1498	0.1157	0.1411			197.2	0.0402	0.0194	0.0124	0.0729
598.8	0.597635	0.537681	0.527658	0.481802	0.485904	0.483097	1.42419	1.30038	1.41632	0.400456	0.545827	0.467213			598.8	0.488811	0.523501	0.505736	0.466151	0.470022	0.464933	0.917988	0.959353	1.03083	0.376115	0.496114	0.485855			197.6	0.0564	0.0665	0.0251	0.0946	0.1257	0.0581	0.1128	0.1217	0.1108	0.1498	0.1157	0.1413			197.6	0.0407	0.0188	0.0129	0.0724
599	0.595678	0.535907	0.525879	0.48033	0.484458	0.48149	1.41835	1.29531	1.41024	0.399246	0.544041	0.465781			599	0.487209	0.521699	0.504074	0.464588	0.468543	0.463468	0.914449	0.955744	1.02652	0.374925	0.494778	0.4846			198	0.0563	0.0672	0.0255	0.0955	0.1255	0.0602	0.1139	0.1214	0.1111	0.1506	0.1149	0.1405			198	0.04	0.0201	0.0131	0.0719
599.2	0.591836	0.532541	0.522387	0.477476	0.481575	0.478561	1.40686	1.28478	1.39868	0.39722	0.540971	0.462804			599.2	0.484144	0.518371	0.500832	0.461493	0.465517	0.460681	0.907336	0.94875	1.01855	0.372942	0.491596	0.481185			198.4	0.0577	0.0684	0.0258	0.0953	0.1256	0.0599	0.1129	0.1223	0.1118	0.1502	0.1162	0.1406			198.4	0.0403	0.0188	0.0119	0.0737
599.4	0.588501	0.529682	0.519515	0.474958	0.478997	0.476145	1.39759	1.27607	1.3888	0.395698	0.538088	0.460635			599.4	0.481515	0.515694	0.498084	0.458875	0.463058	0.458226	0.901379	0.942463	1.01188	0.371297	0.488744	0.479013			198.8	0.0571	0.0679	0.0253	0.0952	0.1247	0.0593	0.1134	0.1221	0.1114	0.1496	0.1155	0.1408			198.8	0.0407	0.0199	0.013	0.0733
599.6	0.585847	0.527417	0.517324	0.472976	0.476953	0.474139	1.39002	1.26933	1.3807	0.394537	0.535816	0.458797			599.6	0.479472	0.513463	0.496014	0.456844	0.46102	0.456263	0.896376	0.937505	1.00625	0.369775	0.486381	0.477055			199.2	0.0569	0.0682	0.0256	0.0958	0.1259	0.0592	0.113	0.1229	0.1117	0.1494	0.1152	0.1408			199.2	0.0416	0.0194	0.0127	0.0733
599.8	0.582263	0.524066	0.513978	0.469913	0.473947	0.471068	1.37795	1.25983	1.36886	0.392363	0.532151	0.455651			599.8	0.476379	0.510112	0.49285	0.45377	0.458275	0.453215	0.889122	0.930278	0.997897	0.367482	0.483438	0.474516			199.6	0.0579	0.0679	0.0248	0.0954	0.1259	0.0595	0.1121	0.1214	0.1117	0.15	0.1154	0.1404			199.6	0.041	0.0195	0.0127	0.0734
600	0.580303	0.522441	0.512223	0.468532	0.472501	0.469471	1.37152	1.25451	1.36284	0.391088	0.530578	0.454055			600	0.474869	0.50852	0.491135	0.452371	0.456865	0.451894	0.885262	0.926419	0.993811	0.366378	0.481976	0.472861			200	0.0569	0.0687	0.0251	0.0958	0.1263	0.0593	0.1132	0.1234	0.1116	0.1497	0.1156	0.1406			200	0.0415	0.0193	0.0122	0.0732
600.2	0.576363	0.518969	0.508731	0.465466	0.469392	0.466367	1.36026	1.24385	1.35065	0.38895	0.527141	0.451137			600.2	0.47186	0.505377	0.487834	0.449284	0.453989	0.448769	0.877756	0.918964	0.985761	0.364953	0.479442	0.469991			200.4	0.0591	0.0677	0.0259	0.0955	0.1251	0.06	0.1123	0.1226	0.1104	0.1489	0.115	0.1411			200.4	0.0415	0.0201	0.0125	0.0734
600.4	0.573214	0.51619	0.506053	0.462963	0.467029	0.463874	1.3503	1.23483	1.34092	0.386937	0.524073	0.44852			600.4	0.469223	0.502577	0.485199	0.446895	0.451644	0.446288	0.871787	0.912548	0.979102	0.363053	0.476848	0.467287			200.8	0.057	0.0687	0.0259	0.0957	0.1247	0.0599	0.1131	0.1232	0.1109	0.1495	0.1157	0.1403			200.8	0.0414	0.0203	0.0126	0.0738
600.6	0.570739	0.514007	0.503844	0.460907	0.465082	0.46192	1.34266	1.22772	1.33299	0.385333	0.521846	0.4469			600.6	0.467071	0.500375	0.483041	0.44499	0.449643	0.444397	0.867283	0.907327	0.973342	0.361523	0.474399	0.465541			201.2	0.0578	0.0696	0.0265	0.0955	0.1258	0.0594	0.113	0.1225	0.1111	0.15	0.1154	0.1411			201.2	0.0407	0.0198	0.0123	0.0735
600.8	0.567607	0.51119	0.501131	0.458444	0.462565	0.459517	1.33258	1.2183	1.32329	0.383535	0.518726	0.444599			600.8	0.464299	0.497558	0.48032	0.442652	0.447099	0.44219	0.860802	0.900605	0.966484	0.359693	0.471466	0.46339			201.6	0.0575	0.0691	0.0256	0.0967	0.1261	0.0603	0.1126	0.1221	0.1119	0.1495	0.115	0.1405			201.6	0.0417	0.0195	0.0126	0.0744
601	0.565152	0.508978	0.498864	0.456478	0.460536	0.457484	1.32446	1.21086	1.31545	0.381853	0.516224	0.442599			601	0.462197	0.495317	0.47818	0.440677	0.445095	0.440318	0.855537	0.89524	0.96108	0.358152	0.468825	0.461349			202	0.0584	0.0686	0.0259	0.0956	0.1261	0.0606	0.1127	0.1225	0.112	0.1495	0.1159	0.1409			202	0.041	0.0196	0.0127	0.0738
601.2	0.561434	0.505583	0.495405	0.45367	0.457639	0.454598	1.31241	1.20023	1.30324	0.379981	0.51286	0.439825			601.2	0.459003	0.492042	0.475185	0.438032	0.442381	0.437319	0.847364	0.887537	0.952708	0.356464	0.465564	0.458258			202.4	0.0578	0.0689	0.0254	0.096	0.1264	0.0613	0.1133	0.1223	0.1111	0.15	0.1148	0.1406			202.4	0.0417	0.0195	0.0138	0.0739
601.4	0.559687	0.503994	0.493646	0.452275	0.456227	0.452936	1.30586	1.19479	1.29713	0.379131	0.511553	0.438238			601.4	0.457512	0.490613	0.473536	0.43662	0.440926	0.435904	0.84348	0.883262	0.948387	0.355353	0.464474	0.456174			202.8	0.058	0.0689	0.0256	0.0957	0.1258	0.0609	0.1126	0.1221	0.1115	0.1501	0.1151	0.1401			202.8	0.0412	0.0199	0.0137	0.0739
601.6	0.555984	0.500512	0.49054	0.449384	0.453274	0.450122	1.2942	1.18411	1.2845	0.377545	0.508504	0.434786			601.6	0.454429	0.487464	0.470388	0.433762	0.43817	0.433009	0.836527	0.875609	0.939599	0.354048	0.461694	0.452707			203.2	0.0581	0.0688	0.026	0.096	0.1256	0.0611	0.112	0.1217	0.1109	0.1498	0.1144	0.141			203.2	0.0414	0.0203	0.0125	0.0735
601.8	0.552696	0.497856	0.487845	0.447121	0.450731	0.447641	1.28462	1.17466	1.2744	0.376027	0.505533	0.432629			601.8	0.451835	0.484837	0.467825	0.431456	0.435731	0.430725	0.830578	0.868865	0.932352	0.352313	0.459353	0.450192			203.6	0.0579	0.0689	0.0254	0.0958	0.1262	0.0611	0.1129	0.1232	0.1106	0.1496	0.1156	0.1409			203.6	0.0412	0.0194	0.0134	0.0741
602	0.550204	0.495641	0.485684	0.445192	0.448755	0.445717	1.27721	1.16709	1.26616	0.374517	0.503132	0.430956			602	0.449818	0.482674	0.465705	0.429638	0.433727	0.428903	0.825962	0.863857	0.926547	0.351039	0.457278	0.448332			204	0.0584	0.07	0.0257	0.0965	0.1244	0.0602	0.113	0.1224	0.111	0.1487	0.116	0.1413			204	0.0411	0.0203	0.0127	0.0744
602.2	0.546628	0.492408	0.482584	0.442329	0.445909	0.443097	1.26538	1.15584	1.25438	0.372521	0.500059	0.428041			602.2	0.446869	0.47966	0.462857	0.426733	0.430965	0.425966	0.818992	0.856084	0.917984	0.348639	0.454132	0.444618			204.4	0.0578	0.0701	0.0261	0.0975	0.1264	0.0605	0.113	0.1215	0.1118	0.1489	0.1164	0.1412			204.4	0.0411	0.0199	0.0128	0.0746
602.4	0.544708	0.490834	0.480958	0.440729	0.444433	0.441725	1.25935	1.15029	1.24841	0.371687	0.497917	0.426783			602.4	0.445509	0.478046	0.46125	0.425396	0.4295	0.424428	0.815682	0.851696	0.91411	0.348041	0.452388	0.443215			204.8	0.0582	0.0707	0.0261	0.0969	0.1264	0.0606	0.1129	0.1213	0.1106	0.1498	0.115	0.1405			204.8	0.0408	0.0197	0.0136	0.0736
602.6	0.540992	0.487517	0.477549	0.437761	0.44162	0.438767	1.24661	1.13905	1.23607	0.369337	0.494836	0.42412			602.6	0.442661	0.474907	0.458215	0.422536	0.426922	0.421605	0.808255	0.843906	0.905486	0.345966	0.449562	0.440249			205.2	0.0584	0.0696	0.026	0.0963	0.1262	0.0611	0.1127	0.1219	0.1119	0.1507	0.1153	0.1413			205.2	0.0423	0.02	0.0131	0.0742
602.8	0.537946	0.48483	0.474877	0.435422	0.439247	0.436509	1.23651	1.12948	1.2263	0.367715	0.491563	0.422139			602.8	0.44019	0.472251	0.45559	0.420192	0.424752	0.419445	0.802165	0.837478	0.898692	0.344647	0.447008	0.437915			205.6	0.0589	0.0694	0.0267	0.0961	0.1258	0.0609	0.113	0.1224	0.1117	0.15	0.1144	0.1398			205.6	0.0413	0.0205	0.0129	0.0739
603	0.53536	0.48268	0.472748	0.433587	0.437351	0.43465	1.22868	1.12152	1.21851	0.366311	0.489345	0.420479			603	0.438272	0.470124	0.453531	0.418328	0.422944	0.417548	0.79752	0.832548	0.893411	0.343487	0.4453	0.435978			206	0.0586	0.0701	0.0259	0.097	0.1259	0.0617	0.1126	0.1223	0.1118	0.1493	0.1153	0.1407			206	0.0418	0.0205	0.0131	0.075
603.2	0.532206	0.479901	0.470175	0.431149	0.43496	0.432331	1.21889	1.11203	1.20836	0.36433	0.486677	0.418058			603.2	0.435835	0.467531	0.451044	0.416019	0.420483	0.415231	0.791463	0.825804	0.886045	0.341942	0.442916	0.433367			206.4	0.0584	0.0712	0.0267	0.0963	0.1269	0.0612	0.1127	0.1225	0.1111	0.149	0.1163	0.1417			206.4	0.042	0.021	0.0143	0.0744
603.4	0.529749	0.477679	0.468174	0.429126	0.433128	0.430566	1.21082	1.10492	1.20015	0.362545	0.484401	0.416164			603.4	0.433873	0.465347	0.449071	0.414293	0.418494	0.41334	0.786695	0.820655	0.880285	0.340595	0.440827	0.431299			206.8	0.0592	0.07	0.0264	0.0973	0.1262	0.0615	0.1136	0.1221	0.1112	0.149	0.1152	0.1411			206.8	0.0419	0.0201	0.0142	0.0745
603.6	0.526242	0.474441	0.464922	0.426302	0.430566	0.427626	1.19867	1.0941	1.18823	0.360642	0.480645	0.413301			603.6	0.430975	0.462196	0.446192	0.411548	0.415494	0.410615	0.779744	0.813152	0.872107	0.338526	0.436777	0.428346			207.2	0.0587	0.0706	0.0268	0.0967	0.1263	0.0618	0.1121	0.1221	0.1112	0.1485	0.1154	0.1417			207.2	0.042	0.0208	0.0137	0.075
603.8	0.523235	0.471649	0.46213	0.423913	0.428362	0.425226	1.18866	1.0853	1.17823	0.35903	0.477842	0.410979			603.8	0.428696	0.459589	0.443606	0.40924	0.413325	0.408335	0.773656	0.807254	0.865157	0.337318	0.43427	0.425808			207.6	0.0592	0.0696	0.0268	0.0969	0.1253	0.0616	0.1131	0.1218	0.1117	0.1493	0.1148	0.1408			207.6	0.0424	0.0199	0.0141	0.0742
604	0.520828	0.469516	0.459925	0.422099	0.426538	0.42337	1.18077	1.07823	1.17053	0.35775	0.475681	0.409091			604	0.426844	0.457658	0.441636	0.407397	0.411552	0.406434	0.768959	0.802179	0.859493	0.336041	0.432419	0.423837			208	0.0599	0.0702	0.0274	0.0961	0.1256	0.0622	0.1119	0.123	0.1111	0.15	0.1147	0.1404			208	0.0428	0.0195	0.0133	0.0748
604.2	0.517783	0.466851	0.457321	0.419858	0.424222	0.421245	1.17114	1.06918	1.16075	0.356438	0.473213	0.407111			604.2	0.424477	0.4553	0.43924	0.405233	0.40941	0.404106	0.763008	0.796477	0.852846	0.33444	0.429756	0.421717			208.4	0.0592	0.0702	0.0264	0.0971	0.1258	0.0622	0.1136	0.1221	0.1112	0.1493	0.1153	0.1415			208.4	0.0423	0.0213	0.0138	0.0749
604.4	0.515346	0.464821	0.455228	0.417992	0.422276	0.419538	1.16336	1.06199	1.1528	0.355465	0.471269	0.405168			604.4	0.42259	0.453233	0.437206	0.403533	0.407639	0.402261	0.758473	0.791617	0.847436	0.333145	0.427816	0.419959			208.8	0.0591	0.0706	0.0274	0.0973	0.1265	0.062	0.1132	0.1223	0.1113	0.1493	0.1162	0.1405			208.8	0.0423	0.0205	0.0141	0.0751
604.6	0.511584	0.461553	0.452259	0.415083	0.419588	0.416807	1.15189	1.05164	1.1411	0.353216	0.46782	0.402496			604.6	0.419622	0.450157	0.434261	0.400841	0.405042	0.399628	0.751269	0.784133	0.839378	0.331286	0.424346	0.417228			209.2	0.0597	0.0706	0.0267	0.0963	0.1265	0.062	0.1137	0.1229	0.1109	0.1486	0.1167	0.141			209.2	0.0426	0.0204	0.0137	0.0751
604.8	0.509845	0.460122	0.450713	0.413733	0.418229	0.415485	1.14561	1.04631	1.13517	0.352144	0.466428	0.401303			604.8	0.418064	0.448638	0.432772	0.399505	0.403761	0.39826	0.747632	0.780774	0.835302	0.33019	0.423052	0.416035			209.6	0.0583	0.0717	0.0268	0.0971	0.127	0.062	0.1132	0.1219	0.1117	0.1497	0.1164	0.1407			209.6	0.0423	0.0203	0.0134	0.0746
605	0.506343	0.456684	0.447466	0.411055	0.415445	0.412691	1.13352	1.03536	1.12385	0.350152	0.462959	0.398853			605	0.415419	0.445578	0.42998	0.396857	0.401267	0.395556	0.740548	0.773343	0.82782	0.328352	0.420052	0.41282			210	0.0602	0.0709	0.0262	0.0969	0.1282	0.0623	0.1126	0.1219	0.1113	0.1491	0.1154	0.1409			210	0.0432	0.0211	0.0132	0.0754
605.2	0.503361	0.454061	0.444965	0.408921	0.41328	0.410399	1.12365	1.02678	1.11402	0.348934	0.460342	0.396537			605.2	0.413138	0.443018	0.427595	0.394552	0.399098	0.393313	0.734256	0.766856	0.821427	0.327021	0.417356	0.410496			210.4	0.06	0.0721	0.0275	0.0972	0.1262	0.0635	0.1129	0.1223	0.1117	0.1495	0.1149	0.1408			210.4	0.0422	0.0216	0.0141	0.0748
605.4	0.500989	0.451904	0.442931	0.407105	0.411481	0.40861	1.11559	1.01985	1.10596	0.347957	0.458264	0.394634			605.4	0.411365	0.440956	0.425597	0.392829	0.397256	0.391616	0.729127	0.761661	0.81589	0.325978	0.415146	0.408596			210.8	0.0596	0.0712	0.0268	0.0965	0.1273	0.0631	0.1129	0.1217	0.1121	0.1491	0.1153	0.1404			210.8	0.043	0.0216	0.014	0.0759
605.6	0.497402	0.448766	0.439961	0.404545	0.408768	0.405694	1.10427	1.00955	1.09393	0.345802	0.455174	0.391917			605.6	0.408326	0.437771	0.422671	0.390105	0.394691	0.389124	0.72177	0.754691	0.807485	0.324002	0.412392	0.4061			211.2	0.0597	0.0714	0.027	0.0979	0.1264	0.0643	0.1138	0.1226	0.1117	0.1497	0.1149	0.1413			211.2	0.042	0.0217	0.0142	0.0752
605.8	0.4958	0.447209	0.438489	0.40318	0.407388	0.404327	1.09853	1.00413	1.08837	0.344795	0.453171	0.390513			605.8	0.406971	0.436226	0.421007	0.388788	0.393452	0.387805	0.718462	0.750971	0.803706	0.323541	0.410462	0.404816			211.6	0.0596	0.072	0.0276	0.0972	0.1268	0.0634	0.113	0.1226	0.1115	0.1488	0.1151	0.1401			211.6	0.0427	0.0212	0.0129	0.0762
606	0.492115	0.444054	0.435615	0.400461	0.40464	0.401609	1.08727	0.993581	1.0767	0.343063	0.449994	0.387643			606	0.404171	0.433238	0.418155	0.386242	0.390697	0.385121	0.711988	0.74355	0.795823	0.321844	0.407373	0.401675			212	0.0592	0.0724	0.0277	0.0977	0.1263	0.0631	0.1124	0.1227	0.1124	0.1493	0.1162	0.1412			212	0.0434	0.0211	0.0133	0.0758
606.2	0.489407	0.441362	0.432925	0.398285	0.402377	0.399422	1.07745	0.984815	1.06715	0.341328	0.447283	0.385616			606.2	0.401875	0.430865	0.415707	0.384033	0.388553	0.383058	0.705964	0.737161	0.788791	0.32037	0.404636	0.399254			212.4	0.0599	0.0719	0.0267	0.0969	0.1265	0.0631	0.1132	0.1222	0.1129	0.1491	0.116	0.1401			212.4	0.0432	0.0201	0.0137	0.0751
606.4	0.487258	0.439264	0.43074	0.396536	0.400627	0.397664	1.06955	0.977733	1.05935	0.339993	0.445058	0.384037			606.4	0.399939	0.428973	0.41381	0.382394	0.386806	0.381286	0.701167	0.732307	0.7834	0.319147	0.402465	0.397435			212.8	0.0597	0.0726	0.0278	0.0976	0.127	0.064	0.1117	0.1219	0.1118	0.1492	0.1155	0.1411			212.8	0.043	0.0211	0.0136	0.0761
606.6	0.483789	0.436202	0.427615	0.39388	0.397957	0.395066	1.05831	0.967185	1.04801	0.338816	0.441709	0.381621			606.6	0.397117	0.426063	0.410872	0.379852	0.384394	0.37856	0.693985	0.725107	0.775951	0.317696	0.399363	0.394582			213.2	0.0603	0.0721	0.0275	0.0978	0.1271	0.0629	0.1132	0.122	0.111	0.1501	0.1158	0.1411			213.2	0.0438	0.0213	0.0141	0.0764
606.8	0.482092	0.434671	0.426123	0.392607	0.396469	0.393794	1.05262	0.961968	1.04242	0.337989	0.440397	0.380539			606.8	0.395768	0.424665	0.40948	0.378497	0.383278	0.377314	0.690939	0.721659	0.772039	0.316952	0.398095	0.393387			213.6	0.0604	0.0724	0.028	0.0981	0.1274	0.0644	0.1131	0.1234	0.1104	0.1503	0.1153	0.1407			213.6	0.0438	0.0205	0.0143	0.0769
607	0.478537	0.431571	0.423082	0.389993	0.393593	0.391187	1.04131	0.951544	1.03121	0.336507	0.437169	0.378074			607	0.393042	0.421802	0.406497	0.375929	0.380786	0.374678	0.684038	0.714227	0.763671	0.31524	0.395526	0.390974			214	0.0598	0.0727	0.0276	0.0981	0.1267	0.0626	0.1134	0.1235	0.112	0.1497	0.1153	0.1409			214	0.0428	0.0205	0.0142	0.0767
607.2	0.47577	0.429091	0.420798	0.387716	0.391324	0.388935	1.03197	0.943107	1.02147	0.335246	0.434829	0.375989			607.2	0.390821	0.419259	0.404116	0.373727	0.378635	0.372475	0.678395	0.707982	0.757251	0.314034	0.393481	0.389078			214.4	0.0604	0.0737	0.0281	0.0979	0.1274	0.0636	0.1135	0.1233	0.1118	0.1492	0.1162	0.1407			214.4	0.043	0.0217	0.0143	0.076
607.4	0.473609	0.42714	0.418842	0.385947	0.389666	0.387086	1.02448	0.936356	1.01382	0.334065	0.432824	0.374281			607.4	0.388988	0.417281	0.402242	0.371986	0.376834	0.370677	0.673856	0.702763	0.751949	0.313126	0.391864	0.387469			214.8	0.0609	0.0725	0.028	0.0974	0.1258	0.0636	0.1127	0.1227	0.1112	0.1491	0.115	0.1407			214.8	0.0436	0.0209	0.014	0.0765
607.6	0.470881	0.424679	0.416536	0.383839	0.387591	0.38483	1.015	0.927698	1.00426	0.332052	0.429953	0.372283			607.6	0.386775	0.414771	0.399963	0.369776	0.374655	0.368572	0.667945	0.697009	0.745142	0.311504	0.389645	0.385202			215.2	0.0605	0.0729	0.0283	0.0974	0.127	0.0641	0.1124	0.1221	0.1113	0.1492	0.1166	0.1419			215.2	0.0436	0.0214	0.0135	0.0769
607.8	0.468634	0.422607	0.414647	0.382192	0.385752	0.383018	1.00748	0.92068	0.996738	0.330514	0.427848	0.370611			607.8	0.384856	0.412911	0.398025	0.36793	0.372872	0.366896	0.663591	0.692388	0.740138	0.310223	0.38789	0.383312			215.6	0.0609	0.0734	0.0282	0.0988	0.1269	0.0643	0.1123	0.1224	0.1124	0.1502	0.1161	0.1416			215.6	0.0442	0.0214	0.0145	0.0765
608	0.46528	0.419637	0.411631	0.379579	0.383015	0.380375	0.997079	0.910717	0.985889	0.328842	0.424464	0.368328			608	0.382399	0.40997	0.395308	0.365252	0.370315	0.364361	0.657671	0.685524	0.732404	0.308387	0.384794	0.380756			216	0.0607	0.073	0.028	0.099	0.1264	0.0646	0.1134	0.1221	0.1108	0.1491	0.115	0.1407			216	0.0431	0.0217	0.014	0.0766
608.2	0.463566	0.418129	0.410181	0.378252	0.38168	0.378974	0.99141	0.905671	0.980323	0.327818	0.423087	0.366795			608.2	0.381024	0.408641	0.393814	0.364017	0.36899	0.363172	0.654303	0.681933	0.728833	0.307528	0.3832	0.379397			216.4	0.0611	0.0733	0.0276	0.0985	0.1264	0.0648	0.1119	0.1226	0.1121	0.1498	0.1143	0.1411			216.4	0.0429	0.0218	0.0147	0.0768
608.4	0.460347	0.415164	0.407221	0.375426	0.37892	0.376325	0.980362	0.895316	0.96906	0.325689	0.419852	0.364412			608.4	0.378237	0.40592	0.390818	0.361495	0.366506	0.360828	0.647175	0.674963	0.720825	0.305672	0.380184	0.376965			216.8	0.0618	0.0728	0.0279	0.0975	0.1268	0.0637	0.1132	0.123	0.1116	0.1482	0.1151	0.141			216.8	0.0438	0.0224	0.0148	0.077
608.6	0.457536	0.412646	0.40463	0.373212	0.376784	0.374165	0.97146	0.88701	0.960106	0.323928	0.417346	0.36236			608.6	0.376036	0.403578	0.388434	0.359309	0.364476	0.358709	0.641744	0.66928	0.714583	0.304212	0.377944	0.374693			217.2	0.0612	0.0736	0.0281	0.0973	0.128	0.0649	0.113	0.1223	0.1113	0.1494	0.1162	0.1406			217.2	0.0439	0.0223	0.0142	0.0765
608.8	0.455405	0.410692	0.402654	0.371535	0.375047	0.372502	0.964219	0.880654	0.953191	0.322677	0.415323	0.360702			608.8	0.374277	0.401817	0.386588	0.357534	0.36277	0.356986	0.637673	0.664845	0.70941	0.303249	0.376116	0.373018			217.6	0.0616	0.0737	0.0274	0.0984	0.127	0.0647	0.1136	0.1222	0.1126	0.1499	0.1164	0.1411			217.6	0.0443	0.0218	0.0143	0.077
609	0.452198	0.407859	0.399692	0.368821	0.372541	0.369914	0.953777	0.870943	0.94267	0.321098	0.412181	0.358245			609	0.371545	0.399129	0.383916	0.355017	0.360094	0.354351	0.631824	0.658038	0.701807	0.301424	0.373451	0.370281			218	0.0619	0.0741	0.0282	0.099	0.1264	0.0652	0.1124	0.1225	0.1118	0.15	0.116	0.1413			218	0.0442	0.0218	0.0142	0.0769
609.2	0.450679	0.40633	0.398179	0.367552	0.371387	0.368604	0.948228	0.866471	0.937262	0.319827	0.410833	0.357023			609.2	0.370258	0.397784	0.382438	0.353698	0.358859	0.35308	0.628653	0.654668	0.698079	0.299976	0.372359	0.368834			218.4	0.0615	0.0743	0.0283	0.0985	0.1267	0.0653	0.113	0.1224	0.111	0.1494	0.116	0.1416			218.4	0.0443	0.0215	0.0143	0.0767
609.4	0.447512	0.403393	0.395156	0.364932	0.368856	0.366011	0.937734	0.85702	0.926485	0.318233	0.407911	0.354238			609.4	0.36752	0.395127	0.379734	0.351184	0.356217	0.350383	0.622544	0.648174	0.690682	0.298321	0.369986	0.366336			218.8	0.0615	0.0735	0.0283	0.0981	0.1268	0.0654	0.1132	0.1231	0.1101	0.1492	0.1163	0.1417			218.8	0.0442	0.0226	0.0146	0.0772
609.6	0.444585	0.401036	0.392757	0.362938	0.366633	0.363859	0.929064	0.849825	0.917791	0.31697	0.405382	0.352021			609.6	0.365509	0.392782	0.377423	0.349078	0.354102	0.348438	0.617282	0.643194	0.684698	0.297068	0.367438	0.364374			219.2	0.0614	0.0742	0.0283	0.0984	0.1271	0.0662	0.1133	0.1242	0.1114	0.1487	0.1157	0.142			219.2	0.0443	0.0222	0.0145	0.0776
609.8	0.442381	0.399239	0.390881	0.361428	0.364919	0.362104	0.922061	0.843893	0.91099	0.315683	0.403195	0.350423			609.8	0.363766	0.390918	0.375677	0.347481	0.352479	0.34696	0.613385	0.638985	0.679857	0.296074	0.365396	0.36301			219.6	0.0615	0.0745	0.0284	0.0982	0.1278	0.066	0.1131	0.1223	0.1111	0.1489	0.1157	0.1402			219.6	0.0438	0.0217	0.0137	0.0766
610	0.43924	0.396346	0.388092	0.358927	0.362476	0.359551	0.911402	0.834465	0.900827	0.313812	0.400167	0.347763			610	0.361124	0.388141	0.373005	0.344958	0.349877	0.344426	0.607083	0.632215	0.672394	0.294292	0.3626	0.360579			220	0.062	0.0743	0.0287	0.0991	0.1265	0.0652	0.1134	0.1231	0.1106	0.1491	0.1168	0.1411			220	0.0447	0.0218	0.0156	0.0775
610.2	0.437688	0.395128	0.386687	0.357632	0.361292	0.358341	0.906326	0.829844	0.895656	0.312647	0.398826	0.346464			610.2	0.359763	0.386801	0.371698	0.343767	0.34863	0.343292	0.604174	0.628776	0.668968	0.293288	0.361258	0.359325			220.4	0.0613	0.0744	0.0282	0.0981	0.1275	0.0661	0.1126	0.1211	0.1113	0.1497	0.1158	0.1418			220.4	0.0446	0.022	0.0146	0.0761
610.4	0.434458	0.392309	0.383821	0.35524	0.358787	0.355739	0.896015	0.820648	0.885406	0.310781	0.395377	0.343719			610.4	0.357088	0.384027	0.369136	0.34126	0.346043	0.340818	0.597614	0.622589	0.662186	0.291506	0.358182	0.35632			220.8	0.0623	0.0745	0.0287	0.0986	0.1272	0.0661	0.1136	0.1229	0.1107	0.1498	0.115	0.1414			220.8	0.0441	0.0222	0.0141	0.0777
610.6	0.431623	0.389971	0.381412	0.353148	0.356601	0.353652	0.887609	0.813104	0.877206	0.309307	0.392692	0.341512			610.6	0.354948	0.381812	0.366793	0.33925	0.344082	0.338848	0.592607	0.617122	0.656612	0.290113	0.355771	0.353579			221.2	0.0615	0.0739	0.0282	0.0991	0.1259	0.0674	0.1131	0.1228	0.111	0.1486	0.1157	0.1409			221.2	0.0453	0.0222	0.0148	0.0774
610.8	0.429363	0.388045	0.379484	0.351531	0.354926	0.351968	0.88089	0.806957	0.870775	0.308325	0.390741	0.339778			610.8	0.353216	0.380007	0.364925	0.337622	0.342546	0.337289	0.588486	0.612616	0.652162	0.289218	0.353811	0.351656			221.6	0.0618	0.0747	0.0281	0.0989	0.1262	0.0658	0.1144	0.1232	0.1117	0.1502	0.115	0.141			221.6	0.0442	0.0223	0.0148	0.0776
611	0.426194	0.385255	0.376694	0.348948	0.352624	0.349547	0.871616	0.797967	0.8614	0.306648	0.387762	0.337346			611	0.350865	0.377424	0.362231	0.335231	0.340129	0.335103	0.582737	0.606181	0.645046	0.287975	0.351166	0.349299			222	0.0619	0.0739	0.0287	0.0984	0.1273	0.0658	0.1123	0.1219	0.111	0.1495	0.115	0.1408			222	0.0442	0.022	0.0149	0.0776
611.2	0.424629	0.383841	0.375334	0.347666	0.351404	0.348226	0.86643	0.793557	0.856442	0.305421	0.38614	0.336006			611.2	0.349533	0.376034	0.360952	0.333985	0.338951	0.333904	0.579549	0.603007	0.641298	0.286927	0.349656	0.347961			222.4	0.062	0.0752	0.0284	0.0995	0.1271	0.066	0.1137	0.1227	0.1107	0.1495	0.1161	0.1413			222.4	0.0441	0.0225	0.0146	0.0785
611.4	0.421477	0.381078	0.372557	0.345285	0.348917	0.345874	0.856822	0.784976	0.846562	0.303821	0.38334	0.333841			611.4	0.346833	0.37341	0.358358	0.331731	0.336383	0.33148	0.573428	0.596905	0.634078	0.285303	0.347498	0.345718			222.8	0.0618	0.0759	0.0282	0.0992	0.1273	0.0663	0.1128	0.1224	0.1111	0.1498	0.116	0.1412			222.8	0.0452	0.0219	0.0148	0.078
611.6	0.418853	0.378871	0.370276	0.343287	0.346982	0.343866	0.848749	0.777899	0.838406	0.302523	0.380893	0.331789			611.6	0.344815	0.371054	0.356187	0.329583	0.334222	0.32933	0.568614	0.591778	0.628443	0.284193	0.345669	0.34364			223.2	0.0619	0.0757	0.0286	0.0993	0.1276	0.0667	0.1121	0.1222	0.1111	0.1482	0.1168	0.1412			223.2	0.0446	0.0217	0.0149	0.0773
611.8	0.416734	0.377072	0.368414	0.341723	0.345392	0.342255	0.842405	0.772139	0.831971	0.301455	0.378843	0.330062			611.8	0.343147	0.369295	0.354571	0.32799	0.332517	0.327575	0.564911	0.587786	0.623852	0.282991	0.343935	0.341908			223.6	0.0624	0.0754	0.0292	0.0991	0.1281	0.0679	0.1133	0.1222	0.1111	0.1498	0.1153	0.1412			223.6	0.0448	0.0215	0.015	0.078
612	0.413678	0.374269	0.365732	0.339216	0.342942	0.339733	0.832786	0.763422	0.822206	0.299494	0.376166	0.32783			612	0.340835	0.366518	0.351974	0.325689	0.330354	0.325215	0.558595	0.581546	0.617432	0.280974	0.341594	0.33894			224	0.0627	0.0747	0.0283	0.0986	0.1265	0.0675	0.113	0.1231	0.1104	0.1489	0.1153	0.1411			224	0.0447	0.0212	0.015	0.0787
612.2	0.412156	0.372978	0.364384	0.338057	0.341746	0.33854	0.828146	0.759272	0.817322	0.298742	0.374976	0.326763			612.2	0.339537	0.365153	0.350639	0.324625	0.329106	0.324108	0.55548	0.578734	0.614017	0.280259	0.340387	0.337745			224.4	0.0635	0.0751	0.0287	0.0997	0.1276	0.067	0.1128	0.1229	0.1115	0.1494	0.1157	0.1403			224.4	0.0454	0.0231	0.0142	0.078
612.4	0.409023	0.370311	0.361674	0.335647	0.339015	0.336206	0.819076	0.750796	0.808113	0.296867	0.372157	0.324323			612.4	0.337135	0.362456	0.34817	0.322396	0.326751	0.321822	0.549213	0.572855	0.607697	0.278905	0.337474	0.335284			224.8	0.0619	0.0759	0.0288	0.0991	0.1267	0.0673	0.113	0.1225	0.111	0.1487	0.1149	0.141			224.8	0.0442	0.0224	0.015	0.0785
612.6	0.406418	0.368079	0.359526	0.333656	0.337023	0.334173	0.811708	0.744178	0.800606	0.295275	0.37003	0.322324			612.6	0.335123	0.360161	0.346156	0.320578	0.324796	0.319822	0.544254	0.567852	0.60254	0.277654	0.335085	0.333283			225.2	0.0632	0.076	0.0287	0.099	0.1277	0.0667	0.1129	0.1234	0.1118	0.1495	0.1155	0.1414			225.2	0.0455	0.0232	0.0149	0.0774
612.8	0.404424	0.366263	0.357864	0.332011	0.335466	0.332576	0.805719	0.73878	0.794413	0.293842	0.368278	0.320712			612.8	0.333513	0.358475	0.344493	0.319136	0.323372	0.318233	0.54037	0.563845	0.598337	0.276402	0.333543	0.33172			225.6	0.0628	0.0756	0.0291	0.0997	0.1277	0.068	0.1127	0.1225	0.111	0.1499	0.1157	0.1408			225.6	0.0458	0.0229	0.0151	0.0782
613	0.401633	0.363437	0.355187	0.329413	0.333063	0.330238	0.796628	0.730155	0.785211	0.291961	0.365614	0.318456			613	0.33108	0.355734	0.341929	0.31678	0.321003	0.315705	0.534565	0.557769	0.592004	0.274736	0.331082	0.328949			226	0.0615	0.076	0.0296	0.0999	0.1279	0.0678	0.1137	0.1223	0.1109	0.1489	0.1158	0.1407			226	0.0454	0.0231	0.0147	0.078
613.2	0.400128	0.362166	0.353933	0.32826	0.331829	0.328992	0.792473	0.72599	0.780779	0.291321	0.364079	0.317311			613.2	0.329977	0.354452	0.340578	0.315691	0.319874	0.314594	0.531895	0.554978	0.588866	0.273971	0.329936	0.327536			226.4	0.0619	0.0755	0.029	0.0996	0.1274	0.068	0.1133	0.123	0.1113	0.1494	0.116	0.141			226.4	0.0442	0.0228	0.0149	0.0787
613.4	0.39714	0.359333	0.351213	0.325902	0.329474	0.326559	0.783969	0.71783	0.771909	0.289538	0.361462	0.314997			613.4	0.327617	0.351848	0.338138	0.313379	0.317561	0.312328	0.526393	0.549163	0.582949	0.272362	0.327656	0.325125			226.8	0.0632	0.0767	0.0294	0.0988	0.1271	0.0677	0.1117	0.1223	0.1115	0.1498	0.1158	0.1414			226.8	0.0453	0.0228	0.0152	0.0784
613.6	0.395581	0.358025	0.349931	0.324777	0.328322	0.325386	0.779455	0.713928	0.767733	0.288672	0.360208	0.313731			613.6	0.326345	0.350585	0.336926	0.312193	0.316548	0.311148	0.523931	0.5464	0.58002	0.271545	0.326248	0.324061			227.2	0.0629	0.0757	0.0291	0.0998	0.1262	0.0678	0.1136	0.1235	0.1105	0.1491	0.1143	0.1404			227.2	0.0448	0.0236	0.0152	0.0785
613.8	0.392658	0.355216	0.347409	0.322421	0.325957	0.323082	0.770973	0.705992	0.758808	0.286715	0.357719	0.311317			613.8	0.32404	0.348091	0.334325	0.310039	0.314123	0.308911	0.518702	0.541298	0.57391	0.269815	0.323683	0.321675			227.6	0.0635	0.0768	0.0298	0.0995	0.1276	0.0678	0.1123	0.1223	0.1109	0.1493	0.1154	0.1421			227.6	0.0452	0.0231	0.0156	0.0783
614	0.390721	0.353549	0.345666	0.320868	0.324323	0.321474	0.765415	0.700986	0.752761	0.285426	0.35586	0.309829			614	0.322407	0.346409	0.33268	0.30861	0.312558	0.307486	0.515207	0.537707	0.569807	0.268426	0.32228	0.320006			228	0.0628	0.0762	0.0297	0.1004	0.1277	0.068	0.1128	0.1223	0.1108	0.1499	0.1155	0.1411			228	0.0458	0.0228	0.0156	0.0787
614.2	0.388241	0.35147	0.343475	0.318852	0.322196	0.319527	0.758217	0.694779	0.745291	0.283716	0.353466	0.308135			614.2	0.320335	0.344183	0.330755	0.306748	0.310665	0.305528	0.510761	0.533093	0.564785	0.266611	0.320333	0.318121			228.4	0.0633	0.0766	0.03	0.099	0.1272	0.0678	0.1129	0.1222	0.1113	0.1489	0.1157	0.1407			228.4	0.0457	0.0231	0.0144	0.0793
614.4	0.385279	0.34884	0.340865	0.316595	0.319866	0.317241	0.749944	0.687084	0.736679	0.282064	0.35073	0.30589			614.4	0.3179	0.341653	0.328245	0.304589	0.308396	0.303241	0.505613	0.5277	0.559014	0.265319	0.31806	0.315431			228.8	0.0639	0.0755	0.03	0.0996	0.1273	0.0691	0.1123	0.1219	0.1112	0.1489	0.1158	0.14			228.8	0.046	0.0227	0.0152	0.0785
614.6	0.383819	0.347499	0.339543	0.315399	0.318648	0.316055	0.74611	0.683377	0.732611	0.281263	0.349438	0.304746			614.6	0.316843	0.34039	0.327044	0.303366	0.307201	0.302116	0.503243	0.525411	0.556291	0.264446	0.316631	0.314033			229.2	0.063	0.0761	0.0294	0.0995	0.1267	0.0678	0.1137	0.1229	0.1117	0.1494	0.1163	0.1399			229.2	0.0445	0.0225	0.0148	0.0791
614.8	0.380845	0.344913	0.336949	0.313108	0.316297	0.313741	0.737938	0.675814	0.724476	0.279396	0.3469	0.302292			614.8	0.314346	0.337834	0.324617	0.30099	0.305065	0.299944	0.498022	0.520033	0.55021	0.262714	0.314279	0.311432			229.6	0.0638	0.0768	0.0299	0.0994	0.128	0.0685	0.1125	0.1227	0.1113	0.1498	0.1153	0.1412			229.6	0.0462	0.0239	0.0158	0.0793
615	0.378965	0.343221	0.335342	0.311629	0.314777	0.312217	0.73258	0.670795	0.718914	0.278262	0.345265	0.300902			615	0.312848	0.336091	0.323029	0.299551	0.303681	0.298529	0.49468	0.516418	0.546109	0.261683	0.312808	0.309986			230	0.064	0.0774	0.0298	0.0993	0.1266	0.0687	0.113	0.123	0.1115	0.1492	0.1154	0.1415			230	0.0456	0.0235	0.0154	0.0785
615.2	0.376532	0.341011	0.333194	0.309768	0.312872	0.310315	0.7261	0.664691	0.712317	0.276943	0.343086	0.298928			615.2	0.310882	0.334076	0.321038	0.297886	0.301722	0.296759	0.490767	0.51201	0.541314	0.260408	0.310631	0.308227			230.4	0.0624	0.0775	0.0293	0.1	0.1276	0.0689	0.1129	0.1228	0.1101	0.1485	0.1158	0.1413			230.4	0.0461	0.0227	0.0148	0.0789
615.4	0.373611	0.338504	0.330874	0.30751	0.310426	0.307925	0.71863	0.657438	0.704376	0.275111	0.340352	0.296715			615.4	0.308663	0.331644	0.318608	0.295705	0.299453	0.29442	0.485991	0.507124	0.535864	0.258416	0.307848	0.305825			230.8	0.0634	0.0767	0.03	0.1003	0.1266	0.0695	0.1139	0.1227	0.1105	0.1487	0.1157	0.1414			230.8	0.0456	0.023	0.0155	0.0793
615.6	0.372242	0.337258	0.329664	0.306387	0.309332	0.306787	0.714658	0.653881	0.700353	0.274039	0.338907	0.295574			615.6	0.307553	0.330496	0.317423	0.294567	0.298455	0.293293	0.48372	0.504355	0.532838	0.257181	0.30665	0.304702			231.2	0.0646	0.0776	0.03	0.1002	0.1273	0.0701	0.1138	0.1223	0.1111	0.1499	0.1158	0.1415			231.2	0.0459	0.023	0.0157	0.0801
615.8	0.369462	0.334813	0.327204	0.304254	0.307181	0.304581	0.706697	0.646562	0.692733	0.272277	0.336019	0.293416			615.8	0.305289	0.328103	0.315027	0.292342	0.296303	0.291257	0.478884	0.498966	0.527183	0.255495	0.304568	0.302252			231.6	0.0641	0.0771	0.0307	0.0999	0.1267	0.0694	0.113	0.1221	0.1101	0.15	0.1161	0.1408			231.6	0.046	0.0223	0.0163	0.0795
616	0.367582	0.333046	0.325529	0.302716	0.305713	0.303171	0.701467	0.641561	0.687587	0.271093	0.334122	0.292149			616	0.303745	0.326327	0.313461	0.290822	0.294847	0.289786	0.475655	0.495427	0.523442	0.25437	0.303073	0.300612			232	0.0646	0.077	0.0298	0.1001	0.1264	0.0697	0.1127	0.122	0.1109	0.1506	0.1154	0.1409			232	0.0464	0.0231	0.0154	0.0791
616.2	0.365188	0.331037	0.32339	0.300802	0.303822	0.301468	0.695035	0.635626	0.681345	0.269555	0.331852	0.290495			616.2	0.301772	0.324234	0.31135	0.288934	0.293074	0.288052	0.471605	0.491104	0.519031	0.252987	0.301022	0.298694			232.4	0.0631	0.0777	0.0301	0.1004	0.1269	0.0696	0.1128	0.1231	0.1109	0.1493	0.1151	0.1412			232.4	0.0455	0.0232	0.0152	0.0792
616.4	0.362371	0.328543	0.321024	0.298637	0.301655	0.299155	0.687594	0.628491	0.673757	0.267523	0.329187	0.288254			616.4	0.299496	0.321797	0.309156	0.286811	0.290814	0.286063	0.467269	0.486016	0.513744	0.251012	0.298812	0.296688			232.8	0.0642	0.0778	0.0304	0.1002	0.1273	0.0694	0.1132	0.1235	0.1106	0.1491	0.1159	0.1418			232.8	0.0462	0.0235	0.0156	0.0801
616.6	0.360933	0.327277	0.319857	0.297655	0.300466	0.298078	0.683757	0.624963	0.669964	0.266514	0.327971	0.287096			616.6	0.298309	0.320538	0.308029	0.285786	0.289882	0.285017	0.465061	0.483631	0.510815	0.250106	0.297498	0.295663			233.2	0.0638	0.0782	0.0304	0.1005	0.1267	0.0701	0.1124	0.1232	0.1112	0.1483	0.1168	0.1404			233.2	0.046	0.024	0.0154	0.08
616.8	0.358193	0.324721	0.317496	0.295325	0.298264	0.295996	0.676655	0.61809	0.662813	0.26483	0.325122	0.285011			616.8	0.296321	0.318229	0.305694	0.283679	0.287634	0.283023	0.460343	0.47883	0.50548	0.248825	0.295246	0.293101			233.6	0.0636	0.0781	0.0304	0.0995	0.1276	0.0703	0.1138	0.1236	0.1103	0.149	0.1157	0.1408			233.6	0.046	0.0237	0.0152	0.0791
617	0.356367	0.323251	0.315822	0.293917	0.296802	0.294498	0.671577	0.613719	0.657908	0.263792	0.323457	0.283606			617	0.294794	0.316588	0.304189	0.282264	0.286304	0.281651	0.457187	0.475252	0.501859	0.247933	0.293856	0.291692			234	0.0657	0.0784	0.0304	0.1005	0.1271	0.0701	0.1137	0.1223	0.1108	0.1491	0.1153	0.1412			234	0.0459	0.023	0.0154	0.0805
617.2	0.354087	0.321302	0.313778	0.292124	0.294967	0.292778	0.665354	0.608123	0.652068	0.262617	0.321434	0.281888			617.2	0.292947	0.314584	0.302328	0.280429	0.284657	0.279794	0.453461	0.470862	0.497407	0.247141	0.291961	0.290158			234.4	0.0643	0.0788	0.0308	0.1007	0.1273	0.0704	0.1136	0.1221	0.1113	0.1496	0.1153	0.141			234.4	0.0463	0.0237	0.0163	0.0792
617.4	0.351417	0.318708	0.311522	0.289988	0.292763	0.29057	0.658215	0.601433	0.64526	0.260645	0.318998	0.279905			617.4	0.290741	0.312175	0.299946	0.278413	0.282454	0.277617	0.449207	0.465969	0.492097	0.245481	0.289368	0.28809			234.8	0.0645	0.0784	0.0308	0.1008	0.127	0.0699	0.1124	0.1225	0.1102	0.15	0.1148	0.1413			234.8	0.0471	0.0241	0.0165	0.0803
617.6	0.350026	0.317552	0.310331	0.288924	0.291538	0.289502	0.654678	0.598083	0.64157	0.259762	0.318006	0.278709			617.6	0.289671	0.311057	0.298811	0.277347	0.281348	0.276594	0.446864	0.463854	0.489657	0.244284	0.288326	0.28682			235.2	0.0648	0.0783	0.0302	0.101	0.1283	0.0707	0.1143	0.123	0.111	0.1496	0.1146	0.1405			235.2	0.0465	0.0232	0.0157	0.0799
617.8	0.347463	0.315161	0.307937	0.286794	0.28933	0.287223	0.64735	0.591792	0.634736	0.257947	0.315398	0.276418			617.8	0.287482	0.308612	0.296678	0.275404	0.279471	0.274391	0.44206	0.458705	0.484455	0.242635	0.286148	0.284712			235.6	0.0644	0.0784	0.03	0.1011	0.1273	0.0696	0.1132	0.1233	0.1099	0.15	0.1156	0.141			235.6	0.0466	0.0249	0.015	0.0803
618	0.345718	0.313576	0.306446	0.285364	0.28784	0.285824	0.642856	0.587584	0.630255	0.256653	0.313677	0.275057			618	0.286122	0.307081	0.295177	0.274087	0.278196	0.273082	0.439222	0.455622	0.48121	0.241597	0.284486	0.283124			236	0.0648	0.0789	0.0307	0.0999	0.1277	0.0712	0.1132	0.1221	0.1104	0.1504	0.116	0.1411			236	0.0463	0.0232	0.0151	0.0794
618.2	0.343525	0.311603	0.304509	0.283491	0.286012	0.284039	0.637234	0.582167	0.624634	0.254941	0.311576	0.273061			618.2	0.284307	0.305142	0.293331	0.27238	0.276368	0.271382	0.435681	0.451855	0.477255	0.240414	0.282341	0.281137			236.4	0.0646	0.078	0.0303	0.1005	0.1272	0.0707	0.114	0.1228	0.1101	0.1493	0.1158	0.1411			236.4	0.047	0.0238	0.0164	0.0814
618.4	0.340893	0.309239	0.302219	0.281223	0.283844	0.281933	0.630287	0.576171	0.617951	0.253109	0.309118	0.270954			618.4	0.282077	0.302724	0.291023	0.270253	0.274333	0.269246	0.431267	0.447556	0.472591	0.238975	0.279966	0.279298			236.8	0.065	0.0784	0.0308	0.1007	0.1252	0.0703	0.1127	0.1223	0.1115	0.1493	0.1162	0.1409			236.8	0.0468	0.0239	0.0167	0.08
618.6	0.339605	0.30806	0.301015	0.280164	0.282743	0.280869	0.62667	0.572992	0.614771	0.252104	0.307975	0.269858			618.6	0.281047	0.30157	0.289911	0.269146	0.273389	0.268324	0.428972	0.445135	0.470005	0.238056	0.27908	0.278361			237.2	0.0647	0.0787	0.0306	0.1001	0.1277	0.0697	0.1132	0.1222	0.1106	0.1498	0.115	0.141			237.2	0.0473	0.0231	0.016	0.0809
618.8	0.337135	0.305623	0.298591	0.277825	0.28066	0.278743	0.619916	0.567094	0.608142	0.25046	0.305324	0.267702			618.8	0.278838	0.299317	0.287767	0.267029	0.271276	0.266509	0.424339	0.440199	0.465034	0.237025	0.277083	0.276068			237.6	0.0649	0.0796	0.0305	0.1006	0.1274	0.0706	0.1132	0.1223	0.1108	0.1493	0.1156	0.1409			237.6	0.0474	0.0238	0.0156	0.0805
619	0.335544	0.304074	0.297028	0.276389	0.279368	0.277346	0.615712	0.563108	0.603648	0.249331	0.303878	0.266221			619	0.2774	0.297724	0.286314	0.265727	0.269875	0.265139	0.421632	0.437521	0.461725	0.236085	0.275628	0.274524			238	0.0656	0.0794	0.0305	0.1006	0.1284	0.0711	0.1135	0.1226	0.1103	0.1518	0.1155	0.1406			238	0.0464	0.0244	0.0162	0.0807
619.2	0.333429	0.302252	0.295066	0.274723	0.277717	0.275584	0.610354	0.558422	0.598399	0.247779	0.302213	0.264596			619.2	0.275711	0.295908	0.284587	0.264034	0.26813	0.263506	0.418521	0.434527	0.457855	0.234831	0.273672	0.272807			238.4	0.065	0.0791	0.0317	0.1007	0.1283	0.0706	0.1134	0.1232	0.1109	0.1479	0.115	0.1408			238.4	0.0466	0.0249	0.016	0.0799
619.4	0.330874	0.29988	0.292955	0.272695	0.275768	0.27332	0.604419	0.552698	0.591955	0.246199	0.299943	0.2624			619.4	0.27361	0.293802	0.282531	0.26227	0.266012	0.261539	0.414294	0.430555	0.452833	0.233459	0.271614	0.270575			238.8	0.0651	0.0781	0.0306	0.1013	0.1281	0.0711	0.1126	0.1223	0.1104	0.1494	0.1159	0.1412			238.8	0.0462	0.0241	0.0162	0.0807
619.6	0.329724	0.298761	0.291867	0.271673	0.27472	0.272286	0.601107	0.550124	0.588583	0.245169	0.299021	0.261489			619.6	0.272577	0.292574	0.281451	0.26133	0.265096	0.260435	0.4123	0.428186	0.450529	0.232567	0.270618	0.269452			239.2	0.0651	0.0788	0.0313	0.1006	0.1277	0.0712	0.1134	0.1234	0.1096	0.1487	0.1157	0.1418			239.2	0.0478	0.0238	0.0158	0.08
619.8	0.327141	0.296461	0.289608	0.269419	0.272763	0.27027	0.594652	0.544771	0.582281	0.243741	0.296888	0.259719			619.8	0.270515	0.290226	0.279163	0.259407	0.262927	0.258428	0.407923	0.423907	0.446197	0.231026	0.268853	0.267191			239.6	0.0653	0.0788	0.0303	0.1009	0.1264	0.07	0.1131	0.1218	0.1107	0.1494	0.1151	0.1408			239.6	0.0479	0.0243	0.0157	0.0811
620	0.325465	0.295028	0.288158	0.268072	0.271398	0.268793	0.59054	0.541049	0.578064	0.242589	0.295374	0.258394			620	0.269108	0.288749	0.277766	0.25813	0.261586	0.257029	0.405347	0.421261	0.443185	0.229881	0.267398	0.265921			240	0.0646	0.0803	0.0306	0.1006	0.1276	0.0714	0.113	0.1223	0.1098	0.1489	0.1152	0.1419			240	0.0471	0.0246	0.0161	0.0815
620.2	0.323422	0.293129	0.286332	0.266372	0.269791	0.26703	0.585634	0.536303	0.573112	0.241051	0.293539	0.256763			620.2	0.267331	0.286878	0.276043	0.256437	0.25998	0.255378	0.402157	0.418096	0.439459	0.228527	0.265584	0.264092			240.4	0.065	0.0802	0.0313	0.1012	0.1274	0.0726	0.1127	0.1232	0.1111	0.1487	0.115	0.141			240.4	0.0473	0.0251	0.016	0.0806
620.4	0.32102	0.29089	0.284074	0.264315	0.267878	0.264903	0.579821	0.530654	0.567066	0.23937	0.291405	0.254727			620.4	0.265258	0.284589	0.27395	0.254469	0.258001	0.253399	0.398523	0.414426	0.435265	0.22687	0.263463	0.261858			240.8	0.0664	0.0793	0.0314	0.1015	0.1281	0.0714	0.1131	0.1237	0.1104	0.1487	0.1162	0.1415			240.8	0.0469	0.0236	0.0148	0.081
620.6	0.319651	0.289802	0.282811	0.263183	0.266911	0.263914	0.576895	0.527893	0.564012	0.238547	0.290245	0.253669			620.6	0.264277	0.283614	0.272917	0.253445	0.257126	0.252492	0.396564	0.412879	0.433211	0.226182	0.262429	0.260709			241.2	0.0661	0.0796	0.0316	0.1016	0.1276	0.0724	0.1125	0.1232	0.1099	0.1495	0.115	0.1409			241.2	0.0468	0.0245	0.0161	0.0805
620.8	0.317179	0.28747	0.280732	0.261092	0.265037	0.261945	0.570893	0.522167	0.557905	0.237095	0.287658	0.251592			620.8	0.262199	0.281549	0.270897	0.251529	0.255223	0.250464	0.392647	0.408713	0.429042	0.224938	0.260474	0.258927			241.6	0.0656	0.0793	0.0307	0.1017	0.1277	0.0721	0.1132	0.1221	0.1092	0.1495	0.1161	0.1412			241.6	0.048	0.0244	0.0164	0.0801
621	0.315443	0.286066	0.279255	0.259747	0.263834	0.260604	0.566975	0.518594	0.554033	0.235879	0.286406	0.250494			621	0.26079	0.280147	0.269418	0.250268	0.253863	0.249283	0.390353	0.406192	0.42623	0.223817	0.259103	0.25752			242	0.0662	0.0792	0.0319	0.1016	0.1276	0.0721	0.113	0.123	0.1104	0.1483	0.1153	0.1412			242	0.0474	0.0249	0.0161	0.0811
621.2	0.313321	0.284289	0.277453	0.25803	0.262198	0.258946	0.562079	0.514219	0.549319	0.234646	0.284694	0.249112			621.2	0.259104	0.27836	0.267567	0.248731	0.252143	0.247798	0.38726	0.403172	0.422755	0.222393	0.257463	0.255926			242.4	0.0654	0.0804	0.031	0.1016	0.1277	0.0718	0.1132	0.1221	0.1094	0.15	0.1155	0.1414			242.4	0.0482	0.0247	0.0166	0.0816
621.4	0.310793	0.282248	0.275257	0.256177	0.260363	0.256899	0.55615	0.5091	0.543652	0.232858	0.282709	0.247376			621.4	0.257155	0.276288	0.265436	0.246913	0.250128	0.245829	0.383311	0.399409	0.418764	0.220661	0.255579	0.254322			242.8	0.0653	0.0802	0.0316	0.1013	0.1273	0.0724	0.1137	0.1232	0.1096	0.1497	0.1154	0.1407			242.8	0.0477	0.0243	0.0162	0.0809
621.6	0.308678	0.280362	0.273453	0.254655	0.258722	0.255316	0.551119	0.504924	0.539076	0.231494	0.280663	0.245822			621.6	0.255626	0.274598	0.263771	0.245243	0.248481	0.244329	0.380232	0.3962	0.41557	0.219644	0.253969	0.252613			243.2	0.0665	0.0806	0.0319	0.1018	0.1272	0.071	0.1132	0.1226	0.1105	0.1482	0.1151	0.1414			243.2	0.0472	0.0245	0.0157	0.0809
621.8	0.307015	0.278882	0.272117	0.253349	0.257441	0.254	0.547471	0.501467	0.535363	0.230311	0.278932	0.244515			621.8	0.254337	0.273188	0.262473	0.243989	0.247171	0.243144	0.377974	0.393457	0.41326	0.218682	0.252503	0.251144			243.6	0.0666	0.0811	0.0322	0.1013	0.128	0.0732	0.1133	0.1238	0.1099	0.1489	0.1152	0.1406			243.6	0.048	0.0253	0.0168	0.0809
622	0.304478	0.276758	0.270042	0.251541	0.255494	0.252031	0.541822	0.496382	0.52983	0.228916	0.276865	0.242852			622	0.252344	0.27102	0.260441	0.242209	0.245231	0.241106	0.374607	0.389941	0.409264	0.21701	0.250477	0.24924			244	0.0666	0.0797	0.031	0.1016	0.1271	0.0724	0.1128	0.1231	0.1101	0.1489	0.116	0.1411			244	0.0464	0.0242	0.0164	0.0819
622.2	0.303211	0.275606	0.26897	0.25051	0.254446	0.251074	0.539048	0.493946	0.527319	0.227995	0.275574	0.241885			622.2	0.251313	0.269971	0.259408	0.241297	0.244215	0.240123	0.372873	0.388075	0.40726	0.216012	0.249244	0.248203			244.4	0.0657	0.0795	0.0318	0.1015	0.1264	0.0728	0.1129	0.1222	0.1101	0.1482	0.1157	0.1406			244.4	0.0489	0.0235	0.0155	0.0818
622.4	0.300763	0.273424	0.266925	0.248628	0.252403	0.249072	0.533573	0.488991	0.521764	0.22642	0.273134	0.240027			622.4	0.249412	0.267838	0.25738	0.239597	0.242293	0.23828	0.369309	0.384039	0.403629	0.214436	0.247094	0.246261			244.8	0.0659	0.081	0.0315	0.1021	0.128	0.0728	0.1132	0.1229	0.11	0.1494	0.1148	0.1411			244.8	0.0475	0.0235	0.016	0.0824
622.6	0.298714	0.271718	0.265254	0.246979	0.25072	0.247529	0.52906	0.484965	0.517589	0.225325	0.271265	0.238542			622.6	0.247732	0.266125	0.255598	0.237948	0.240774	0.236791	0.366282	0.381004	0.400601	0.213128	0.245313	0.244788			245.2	0.0671	0.0799	0.0321	0.1013	0.1277	0.0733	0.1133	0.1223	0.1098	0.1496	0.1155	0.1416			245.2	0.0477	0.0246	0.0159	0.0809
622.8	0.29711	0.270272	0.263804	0.245647	0.24931	0.246237	0.525736	0.481532	0.514124	0.224422	0.269766	0.23711			622.8	0.246471	0.264848	0.254185	0.236611	0.239485	0.23558	0.364078	0.378542	0.398159	0.212113	0.243981	0.243503			245.6	0.0669	0.0807	0.0317	0.1015	0.1277	0.0734	0.1136	0.1227	0.1096	0.1487	0.1159	0.1412			245.6	0.0484	0.0253	0.0165	0.0815
623	0.294672	0.268166	0.261652	0.24379	0.247359	0.244355	0.520609	0.476903	0.508964	0.222657	0.267575	0.23517			623	0.244506	0.262823	0.252217	0.234684	0.237742	0.233756	0.360895	0.375266	0.394164	0.210473	0.242008	0.241446			246	0.066	0.082	0.0327	0.1017	0.128	0.0733	0.114	0.1234	0.1094	0.1496	0.1158	0.1413			246	0.0476	0.0248	0.0171	0.0806
623.2	0.293493	0.267142	0.260582	0.242819	0.246371	0.243449	0.517969	0.474587	0.506466	0.221583	0.266355	0.234127			623.2	0.243514	0.261842	0.251204	0.233604	0.236787	0.232811	0.359111	0.37341	0.392033	0.209606	0.241005	0.24054			246.4	0.0669	0.0803	0.0317	0.1009	0.1277	0.0732	0.1137	0.1235	0.1102	0.1483	0.1172	0.1419			246.4	0.0483	0.0251	0.0168	0.0818
623.4	0.290969	0.265012	0.258395	0.241156	0.244415	0.241535	0.51274	0.470388	0.501316	0.220049	0.264095	0.23246			623.4	0.241592	0.259779	0.249198	0.231794	0.23486	0.230972	0.355985	0.369666	0.388378	0.208086	0.239093	0.238794			246.8	0.0668	0.0803	0.0325	0.1011	0.1269	0.0735	0.1134	0.1233	0.1101	0.15	0.116	0.1423			246.8	0.0483	0.0243	0.0166	0.0818
623.6	0.289097	0.263212	0.256736	0.239598	0.242797	0.24005	0.508457	0.466677	0.497348	0.218683	0.26236	0.23092			623.6	0.239928	0.258114	0.247572	0.23026	0.23332	0.229475	0.353108	0.366905	0.385345	0.206741	0.237383	0.237378			247.2	0.0663	0.0812	0.0317	0.1017	0.1283	0.0738	0.1128	0.1225	0.1104	0.1488	0.1158	0.141			247.2	0.0496	0.0248	0.016	0.082
623.8	0.287615	0.261802	0.255394	0.238481	0.24146	0.23885	0.505114	0.463813	0.494291	0.217671	0.260895	0.229766			623.8	0.238687	0.256714	0.246288	0.229032	0.232057	0.228233	0.351039	0.36456	0.382947	0.205674	0.236182	0.236104			247.6	0.0676	0.082	0.0325	0.1014	0.1274	0.0734	0.1135	0.1228	0.1095	0.1488	0.1155	0.1422			247.6	0.0489	0.025	0.0165	0.0812
624	0.285413	0.259769	0.253229	0.236593	0.239501	0.237044	0.500433	0.45942	0.489486	0.215955	0.259068	0.228063			624	0.236969	0.25452	0.244241	0.227139	0.23009	0.226506	0.347976	0.361319	0.379607	0.204146	0.234216	0.234192			248	0.0674	0.0813	0.0324	0.1013	0.1286	0.0738	0.1137	0.1222	0.11	0.1487	0.1147	0.1403			248	0.048	0.0251	0.0163	0.0825
624.2	0.284382	0.258777	0.25229	0.235707	0.23857	0.236134	0.498025	0.457138	0.486998	0.215153	0.257889	0.227208			624.2	0.236039	0.25345	0.243267	0.226242	0.22916	0.225665	0.346344	0.359644	0.377929	0.203511	0.233187	0.233303			248.4	0.0676	0.0811	0.033	0.1023	0.1281	0.0742	0.1133	0.1225	0.1098	0.1485	0.1159	0.1406			248.4	0.0477	0.0252	0.0163	0.0823
624.4	0.282146	0.256546	0.250193	0.233879	0.236691	0.234302	0.493372	0.452758	0.482166	0.213224	0.255647	0.225349			624.4	0.234182	0.25131	0.241449	0.224312	0.227313	0.223824	0.343337	0.356117	0.374475	0.201815	0.231194	0.231667			248.8	0.0674	0.0808	0.0328	0.1018	0.1274	0.0738	0.1132	0.1231	0.1093	0.1488	0.116	0.1423			248.8	0.0482	0.0256	0.0169	0.0818
624.6	0.280322	0.25476	0.248515	0.232241	0.235087	0.232825	0.489555	0.449215	0.478251	0.211972	0.253883	0.223811			624.6	0.232552	0.249615	0.239772	0.222862	0.225915	0.222368	0.340853	0.353418	0.371721	0.200499	0.229417	0.230116			249.2	0.0672	0.0815	0.033	0.1011	0.1284	0.074	0.1132	0.1236	0.1093	0.1493	0.116	0.1408			249.2	0.049	0.0255	0.0161	0.0824
624.8	0.278823	0.253444	0.247191	0.230956	0.233782	0.231569	0.4867	0.446417	0.475142	0.210982	0.252531	0.222586			624.8	0.231279	0.248224	0.238435	0.2218	0.224729	0.221196	0.338998	0.351199	0.369308	0.199336	0.2279	0.228774			249.6	0.0679	0.0817	0.0332	0.1015	0.1269	0.0742	0.1133	0.1222	0.1089	0.1486	0.117	0.1414			249.6	0.0491	0.0251	0.0171	0.0826
625	0.276751	0.251484	0.245058	0.229173	0.23204	0.229872	0.482178	0.442305	0.470727	0.209474	0.250728	0.221021			625	0.22938	0.24622	0.236428	0.220045	0.223069	0.219374	0.336351	0.348527	0.365802	0.19787	0.226269	0.227078			250	0.0671	0.0814	0.0322	0.1018	0.128	0.0748	0.1123	0.1221	0.1096	0.1496	0.1157	0.1412			250	0.0489	0.0254	0.0168	0.0829
625.2	0.27562	0.250423	0.244006	0.228355	0.231077	0.228985	0.479826	0.44028	0.468582	0.208763	0.24981	0.22013			625.2	0.228366	0.245247	0.235493	0.219147	0.222118	0.218458	0.335051	0.347013	0.364262	0.197099	0.225538	0.226302			250.4	0.0672	0.0825	0.0325	0.1026	0.1276	0.0742	0.1129	0.1232	0.1092	0.1481	0.1152	0.1409			250.4	0.0485	0.0247	0.0166	0.0821
625.4	0.273498	0.248535	0.242177	0.22665	0.229157	0.227147	0.475667	0.436226	0.464338	0.207248	0.247996	0.218201			625.4	0.226558	0.243379	0.233543	0.217272	0.220509	0.216768	0.33217	0.344117	0.361028	0.195729	0.223793	0.224478			250.8	0.0681	0.0821	0.0333	0.1016	0.1278	0.0752	0.1139	0.1222	0.11	0.1494	0.1159	0.1411			250.8	0.048	0.0246	0.0175	0.0823
625.6	0.272079	0.247277	0.240815	0.225385	0.227906	0.225992	0.472679	0.433739	0.461651	0.205996	0.246695	0.217076			625.6	0.225323	0.242174	0.232212	0.216064	0.219333	0.215615	0.330188	0.342055	0.358762	0.194575	0.222699	0.223324			251.2	0.0678	0.0821	0.0326	0.1028	0.128	0.0741	0.1132	0.1233	0.109	0.1487	0.116	0.141			251.2	0.0486	0.0257	0.0171	0.0822
625.8	0.270433	0.245696	0.239165	0.223846	0.226359	0.224513	0.469029	0.430458	0.458215	0.204428	0.245228	0.215587			625.8	0.22389	0.240593	0.230691	0.214562	0.217881	0.214231	0.327953	0.339466	0.355985	0.193279	0.221396	0.221734			251.6	0.0682	0.0821	0.0325	0.102	0.1278	0.0755	0.1133	0.123	0.1099	0.1495	0.116	0.1418			251.6	0.0483	0.0245	0.0162	0.0827
626	0.268228	0.243773	0.237126	0.22214	0.224573	0.222787	0.46454	0.426645	0.454191	0.202634	0.243518	0.213899			626	0.222177	0.238675	0.22887	0.21285	0.216122	0.212462	0.325221	0.33651	0.352756	0.191599	0.219871	0.219809			252	0.0678	0.0833	0.0335	0.1029	0.1274	0.0752	0.1129	0.1239	0.1096	0.1492	0.1158	0.142			252	0.0484	0.0261	0.0166	0.083
626.2	0.267112	0.243008	0.236245	0.221249	0.223679	0.221816	0.462391	0.424488	0.452097	0.202013	0.242194	0.212893			626.2	0.221305	0.237763	0.22791	0.21196	0.215234	0.21163	0.323751	0.334833	0.351334	0.190799	0.218905	0.218862			252.4	0.0672	0.082	0.033	0.1028	0.1283	0.0755	0.1129	0.1224	0.109	0.1493	0.1155	0.1415			252.4	0.0487	0.0256	0.0164	0.0834
626.4	0.26507	0.240886	0.234409	0.2195	0.221787	0.220086	0.458271	0.420649	0.448245	0.200694	0.240473	0.211354			626.4	0.219517	0.235869	0.226093	0.21041	0.213482	0.209968	0.320621	0.33224	0.348491	0.189333	0.217258	0.217074			252.8	0.0685	0.0829	0.0334	0.103	0.1278	0.0747	0.113	0.1232	0.1098	0.1486	0.1142	0.1407			252.8	0.0489	0.0255	0.0177	0.0823
626.6	0.263709	0.239549	0.23308	0.218274	0.220619	0.218943	0.455597	0.417987	0.4455	0.199635	0.239409	0.21004			626.6	0.218371	0.234555	0.224894	0.209247	0.212401	0.208786	0.318657	0.330275	0.346452	0.188331	0.216103	0.215781			253.2	0.0679	0.0829	0.0332	0.101	0.1283	0.0758	0.1141	0.1235	0.109	0.148	0.1153	0.1407			253.2	0.0491	0.0261	0.0174	0.0827
626.8	0.261911	0.237927	0.231446	0.216694	0.219143	0.217483	0.45225	0.414817	0.442103	0.198331	0.237903	0.208533			626.8	0.216959	0.232911	0.223447	0.207896	0.210933	0.207334	0.316295	0.327762	0.344039	0.187058	0.214782	0.214198			253.6	0.0677	0.0825	0.0337	0.1028	0.1273	0.0755	0.1137	0.1222	0.1089	0.1477	0.116	0.1406			253.6	0.0502	0.0258	0.0172	0.0826
627	0.259728	0.236083	0.229657	0.21491	0.217352	0.215671	0.448347	0.411242	0.437933	0.196969	0.2361	0.206888			627	0.215226	0.231157	0.221643	0.20624	0.209366	0.205718	0.313583	0.324828	0.340875	0.185626	0.21309	0.21246			254	0.0678	0.0827	0.0334	0.1025	0.1278	0.0756	0.1129	0.1233	0.1085	0.1481	0.1155	0.1414			254	0.0493	0.0257	0.0168	0.0829
627.2	0.258556	0.235217	0.228753	0.214083	0.216514	0.214832	0.446531	0.409643	0.436133	0.196277	0.235242	0.206008			627.2	0.214344	0.230212	0.220736	0.205425	0.208481	0.204929	0.312315	0.323501	0.339408	0.184888	0.212315	0.211558			254.4	0.0681	0.0826	0.0333	0.1017	0.1282	0.0761	0.1132	0.1234	0.1094	0.1487	0.1157	0.1413			254.4	0.0488	0.0254	0.0164	0.0834
627.4	0.256467	0.233263	0.226844	0.212374	0.214772	0.213042	0.442684	0.406476	0.4325	0.194849	0.233249	0.204221			627.4	0.212541	0.228507	0.218954	0.203736	0.206845	0.203273	0.309522	0.321062	0.336242	0.18321	0.21061	0.209721			254.8	0.0687	0.0827	0.033	0.103	0.128	0.0761	0.1127	0.1244	0.1086	0.1494	0.1162	0.1402			254.8	0.0498	0.0259	0.017	0.0837
627.6	0.254296	0.23142	0.225007	0.210807	0.213061	0.211439	0.438828	0.403055	0.428793	0.193438	0.231356	0.202687			627.6	0.210838	0.226863	0.217172	0.202044	0.20528	0.201674	0.306973	0.318615	0.333534	0.181773	0.209089	0.207819			255.2	0.0689	0.0825	0.0335	0.1029	0.1266	0.0749	0.1138	0.1234	0.1096	0.1493	0.1157	0.1418			255.2	0.0494	0.0253	0.0176	0.0828
627.8	0.25322	0.230389	0.223984	0.209968	0.212235	0.210518	0.437077	0.401481	0.427037	0.192673	0.230487	0.201763			627.8	0.210014	0.22591	0.216306	0.201238	0.204407	0.200925	0.305794	0.317279	0.331919	0.180974	0.208328	0.206759			255.6	0.0684	0.0835	0.0333	0.1028	0.1279	0.0767	0.114	0.1229	0.1092	0.1486	0.1144	0.1409			255.6	0.049	0.0256	0.0168	0.0832
628	0.251269	0.228586	0.22214	0.208306	0.210612	0.20888	0.433424	0.398213	0.423269	0.191276	0.228637	0.200173			628	0.208262	0.224164	0.214632	0.199524	0.202695	0.199227	0.30317	0.314908	0.329323	0.179739	0.206703	0.205186			256	0.0689	0.0834	0.0336	0.1021	0.1266	0.0761	0.1129	0.123	0.1092	0.1484	0.1156	0.1402			256	0.0498	0.0263	0.0175	0.083
628.2	0.249547	0.227088	0.220669	0.206944	0.209233	0.207337	0.430524	0.395534	0.420037	0.189953	0.227087	0.19874			628.2	0.206915	0.222655	0.213214	0.198198	0.201292	0.197907	0.300735	0.31271	0.326875	0.178606	0.205363	0.203804			256.4	0.0685	0.0838	0.0336	0.103	0.1278	0.0771	0.112	0.1223	0.1082	0.1484	0.1154	0.141			256.4	0.0499	0.0258	0.0173	0.0826
628.4	0.248152	0.225815	0.219494	0.205822	0.208117	0.206216	0.428176	0.393332	0.41746	0.188832	0.22579	0.197708			628.4	0.205755	0.221491	0.212107	0.197144	0.200247	0.196917	0.298779	0.310868	0.324807	0.177531	0.204255	0.202694			256.8	0.0687	0.0827	0.0339	0.1018	0.1274	0.0762	0.1132	0.1235	0.1076	0.15	0.1166	0.1417			256.8	0.0488	0.0261	0.0174	0.0838
628.6	0.246039	0.223995	0.217617	0.204139	0.206515	0.204583	0.424492	0.3901	0.413882	0.187435	0.223978	0.196359			628.6	0.204208	0.21972	0.210333	0.195547	0.198611	0.195351	0.296065	0.30819	0.321943	0.175968	0.202439	0.201272			257.2	0.0682	0.0836	0.0335	0.1031	0.1266	0.0759	0.1127	0.1225	0.1081	0.1493	0.1164	0.1425			257.2	0.0491	0.025	0.0176	0.0831
628.8	0.245011	0.22307	0.21671	0.20334	0.205684	0.203804	0.422915	0.388229	0.412328	0.18677	0.223135	0.195363			628.8	0.203338	0.218792	0.209527	0.194827	0.197898	0.194548	0.294799	0.307102	0.320723	0.175256	0.201808	0.200225			257.6	0.0682	0.083	0.0334	0.1029	0.1281	0.0766	0.1137	0.1239	0.108	0.1486	0.1156	0.1417			257.6	0.049	0.0257	0.0173	0.0836
629	0.242907	0.221194	0.21493	0.201644	0.204122	0.202169	0.419548	0.38516	0.408685	0.185511	0.221353	0.193974			629	0.20157	0.216985	0.207723	0.193387	0.196287	0.192917	0.292215	0.304609	0.318123	0.174105	0.200096	0.198726			258	0.0691	0.0842	0.0328	0.1033	0.1283	0.0773	0.1131	0.1229	0.109	0.1486	0.1151	0.1405			258	0.0498	0.026	0.017	0.0832
629.2	0.241513	0.21998	0.213801	0.2006	0.203123	0.201058	0.417446	0.383063	0.406415	0.184583	0.220073	0.193016			629.2	0.200422	0.215765	0.206666	0.192385	0.19519	0.191845	0.290645	0.302921	0.316402	0.173256	0.198749	0.197809			258.4	0.0689	0.0836	0.0327	0.1025	0.1285	0.076	0.1138	0.1224	0.1084	0.1493	0.1159	0.1407			258.4	0.0494	0.0257	0.0167	0.0846
629.4	0.23988	0.218325	0.212273	0.199344	0.201805	0.199768	0.414823	0.380621	0.403648	0.183197	0.218779	0.191902			629.4	0.199041	0.214199	0.205356	0.191128	0.193828	0.190521	0.288792	0.300996	0.31406	0.171915	0.19734	0.196733			258.8	0.0674	0.0845	0.0339	0.1024	0.1283	0.0777	0.1132	0.1222	0.1076	0.1489	0.1157	0.1412			258.8	0.0497	0.0261	0.0172	0.0839
629.6	0.237885	0.216835	0.210472	0.197805	0.200228	0.198099	0.411626	0.377293	0.400338	0.181492	0.216709	0.190251			629.6	0.19749	0.212384	0.203718	0.189588	0.192232	0.18891	0.286613	0.298433	0.31153	0.170275	0.195395	0.195072			259.2	0.0688	0.0845	0.0342	0.1023	0.1282	0.0769	0.113	0.1232	0.1075	0.1494	0.1163	0.1421			259.2	0.0501	0.0264	0.0171	0.0841
629.8	0.236937	0.215986	0.209572	0.197042	0.199421	0.197333	0.409916	0.37603	0.398888	0.180903	0.2158	0.189493			629.8	0.196617	0.21157	0.202809	0.188865	0.191498	0.188156	0.285436	0.297291	0.310277	0.169549	0.194527	0.194357			259.6	0.069	0.0843	0.0339	0.1031	0.1276	0.077	0.1133	0.1234	0.1082	0.1488	0.1162	0.1418			259.6	0.0501	0.0259	0.0171	0.0837
630	0.235128	0.214377	0.207842	0.195467	0.197823	0.195734	0.40676	0.373596	0.395817	0.179253	0.213877	0.188156			630	0.195071	0.209937	0.201179	0.187374	0.189822	0.186643	0.283147	0.295105	0.307756	0.167937	0.19288	0.192854			260	0.0698	0.0835	0.0335	0.1024	0.1276	0.0763	0.1129	0.1224	0.108	0.1489	0.1162	0.1419			260	0.0513	0.0257	0.0174	0.0838
630.2	0.233835	0.21311	0.206714	0.194404	0.196782	0.194729	0.404614	0.371678	0.393805	0.178183	0.212772	0.187214			630.2	0.194015	0.208728	0.200121	0.186394	0.188646	0.185596	0.281627	0.29349	0.30612	0.166902	0.191851	0.191898			260.4	0.0693	0.084	0.0339	0.1029	0.128	0.0763	0.1132	0.1244	0.1076	0.1484	0.1154	0.141			260.4	0.0501	0.0255	0.0175	0.0843
630.4	0.23225	0.211533	0.205203	0.193126	0.195473	0.193451	0.401854	0.369432	0.391355	0.176929	0.211213	0.185991			630.4	0.192625	0.207308	0.198718	0.1852	0.187325	0.184271	0.279693	0.291554	0.304066	0.165846	0.190544	0.190693			260.8	0.0698	0.0848	0.0336	0.1026	0.1289	0.0768	0.1131	0.1227	0.107	0.1481	0.1156	0.1416			260.8	0.0503	0.0253	0.017	0.0839
630.6	0.230383	0.209939	0.203536	0.191594	0.193983	0.191939	0.398759	0.366542	0.388403	0.175541	0.209444	0.184478			630.6	0.191246	0.205594	0.197097	0.183638	0.185874	0.182688	0.277597	0.289074	0.301658	0.164496	0.189066	0.189074			261.2	0.0689	0.085	0.0341	0.1025	0.1277	0.077	0.1139	0.1223	0.1074	0.1486	0.1156	0.1416			261.2	0.0508	0.026	0.0171	0.0838
630.8	0.228875	0.208662	0.20233	0.190199	0.19266	0.190568	0.396121	0.364177	0.385893	0.1743	0.208073	0.183168			630.8	0.18998	0.204185	0.195839	0.182448	0.18459	0.181384	0.275761	0.287271	0.299652	0.163326	0.187853	0.187931			261.6	0.0692	0.0845	0.0342	0.103	0.1282	0.0772	0.1136	0.1229	0.108	0.1494	0.1162	0.142			261.6	0.05	0.0266	0.0172	0.0842
631	0.227716	0.207636	0.201321	0.18919	0.191626	0.189532	0.394181	0.362135	0.38388	0.173346	0.206991	0.182206			631	0.188985	0.203063	0.194786	0.181402	0.183601	0.180326	0.274408	0.285654	0.298062	0.162278	0.18685	0.187008			262	0.069	0.0838	0.0343	0.1034	0.1282	0.0778	0.1134	0.1229	0.1077	0.1498	0.1157	0.1413			262	0.0504	0.0267	0.017	0.0837
631.2	0.225843	0.205948	0.199693	0.187652	0.190116	0.187974	0.391416	0.359292	0.381006	0.171717	0.205483	0.180697			631.2	0.187341	0.201363	0.193206	0.179948	0.182161	0.17886	0.272306	0.283063	0.295518	0.160527	0.185712	0.18548			262.4	0.0696	0.0841	0.0343	0.103	0.1278	0.0776	0.113	0.1231	0.1082	0.1497	0.1158	0.1414			262.4	0.0501	0.0264	0.0173	0.0827
631.4	0.224875	0.205068	0.198882	0.186873	0.189289	0.187303	0.390056	0.358089	0.379749	0.17092	0.204711	0.17989			631.4	0.186564	0.200563	0.192439	0.179294	0.181433	0.178127	0.271389	0.282093	0.294109	0.159857	0.185007	0.184813			262.8	0.0702	0.0843	0.0346	0.1026	0.1285	0.0768	0.1138	0.1233	0.1076	0.1493	0.1157	0.141			262.8	0.0508	0.0267	0.0172	0.0835
631.6	0.223076	0.203463	0.197237	0.18538	0.187861	0.185918	0.38704	0.355483	0.377255	0.169486	0.20319	0.178511			631.6	0.185093	0.198918	0.190956	0.17779	0.180006	0.176687	0.269445	0.279855	0.292003	0.158579	0.183382	0.183302			263.2	0.0699	0.0844	0.034	0.1032	0.1285	0.0781	0.1134	0.1234	0.1069	0.1498	0.1163	0.1404			263.2	0.0505	0.0258	0.0174	0.0841
631.8	0.221897	0.202414	0.196193	0.184332	0.186921	0.184894	0.385116	0.353837	0.375413	0.168424	0.202081	0.177505			631.8	0.184111	0.197818	0.189984	0.176892	0.179029	0.175657	0.26802	0.278506	0.290517	0.157814	0.182353	0.18218			263.6	0.0694	0.085	0.0343	0.1026	0.1281	0.0784	0.1135	0.1229	0.1063	0.1479	0.1152	0.1407			263.6	0.0505	0.027	0.0182	0.0844
632	0.220498	0.201101	0.194857	0.183116	0.185756	0.183624	0.382577	0.351848	0.372897	0.167155	0.20072	0.176157			632	0.182879	0.196397	0.18874	0.175662	0.177861	0.174416	0.266355	0.276691	0.288576	0.15682	0.181	0.180987			264	0.0695	0.0849	0.0348	0.1035	0.1274	0.078	0.1129	0.1225	0.1069	0.1483	0.1152	0.141			264	0.0506	0.0271	0.0186	0.084
632.2	0.218634	0.199487	0.193174	0.181851	0.184232	0.182098	0.379831	0.349212	0.370334	0.165711	0.199181	0.174666			632.2	0.1814	0.19482	0.187256	0.174003	0.176484	0.172907	0.264531	0.274701	0.286423	0.155242	0.179738	0.179671			264.4	0.0697	0.0856	0.0342	0.1028	0.1284	0.0772	0.1132	0.1229	0.1069	0.149	0.115	0.141			264.4	0.0509	0.0258	0.0173	0.0843
632.4	0.217803	0.198681	0.192364	0.181072	0.183584	0.181369	0.378424	0.347992	0.368893	0.164908	0.198325	0.173903			632.4	0.1807	0.19405	0.186446	0.173297	0.175871	0.172239	0.263702	0.273674	0.285267	0.15458	0.179009	0.17884			264.8	0.0709	0.0844	0.0345	0.1029	0.1279	0.0782	0.1134	0.1235	0.1071	0.1483	0.1165	0.1412			264.8	0.0508	0.0266	0.0179	0.0839
632.6	0.216226	0.19712	0.190843	0.179511	0.182055	0.179915	0.375739	0.345463	0.36621	0.163696	0.196673	0.172439			632.6	0.179191	0.192568	0.184875	0.171865	0.174477	0.170871	0.26177	0.271647	0.283386	0.153684	0.177269	0.177345			265.2	0.0701	0.0856	0.0344	0.1035	0.1278	0.0782	0.1129	0.1239	0.1075	0.1496	0.116	0.1418			265.2	0.0512	0.0257	0.0182	0.0835
632.8	0.215104	0.196017	0.189824	0.178472	0.181106	0.178948	0.373978	0.343993	0.364361	0.162816	0.195836	0.171574			632.8	0.178251	0.191532	0.183853	0.170957	0.173545	0.169926	0.260531	0.270426	0.281913	0.153042	0.17639	0.176504			265.6	0.0706	0.0849	0.0346	0.1032	0.1279	0.0777	0.1138	0.1225	0.1078	0.1484	0.1166	0.1409			265.6	0.0508	0.0262	0.0172	0.0847
633	0.213602	0.1947	0.18862	0.177177	0.179841	0.177707	0.371834	0.341756	0.362022	0.161636	0.194643	0.170487			633	0.17705	0.190275	0.182588	0.169773	0.17236	0.168746	0.259026	0.268734	0.280071	0.151848	0.175446	0.175373			266	0.0706	0.0857	0.0352	0.1031	0.1275	0.0791	0.1124	0.1232	0.1064	0.1491	0.1151	0.1408			266	0.0505	0.0264	0.018	0.0853
633.2	0.211904	0.193016	0.187135	0.175804	0.178393	0.176235	0.369324	0.339111	0.359337	0.160032	0.193006	0.169047			633.2	0.175479	0.188651	0.181107	0.168299	0.1711	0.167464	0.257125	0.266887	0.278061	0.150613	0.174056	0.173831			266.4	0.0697	0.085	0.0342	0.1025	0.1264	0.0783	0.1131	0.1227	0.1068	0.1487	0.1162	0.1413			266.4	0.0501	0.0269	0.018	0.0851
633.4	0.210535	0.191735	0.185842	0.174688	0.177182	0.175047	0.367039	0.337024	0.357337	0.158775	0.191607	0.167837			633.4	0.174333	0.187359	0.179828	0.16718	0.17003	0.166431	0.255499	0.265664	0.27648	0.149509	0.172851	0.172582			266.8	0.0703	0.0862	0.0353	0.1044	0.1283	0.0784	0.1128	0.1229	0.1061	0.1491	0.1151	0.1417			266.8	0.0513	0.0272	0.0186	0.0838
633.6	0.209479	0.190754	0.184853	0.173805	0.176253	0.174103	0.365464	0.335391	0.355669	0.157851	0.190596	0.166975			633.6	0.173384	0.186393	0.178786	0.166239	0.169186	0.165537	0.254435	0.264568	0.275187	0.148609	0.171863	0.171607			267.2	0.0707	0.0853	0.0345	0.104	0.1274	0.0788	0.1139	0.1239	0.107	0.1496	0.1162	0.1408			267.2	0.0512	0.0264	0.0173	0.0844
633.8	0.20774	0.18911	0.183352	0.172342	0.174831	0.172571	0.363009	0.333053	0.353171	0.156721	0.189116	0.165655			633.8	0.171835	0.184935	0.177371	0.164989	0.167782	0.164218	0.252798	0.262442	0.27325	0.147521	0.170338	0.17021			267.6	0.0703	0.0862	0.0355	0.1042	0.1282	0.0791	0.1127	0.1228	0.1069	0.1495	0.1149	0.1412			267.6	0.0508	0.0265	0.0174	0.084
634	0.206933	0.188233	0.182507	0.171679	0.174256	0.171875	0.361961	0.331931	0.35201	0.156218	0.188356	0.165014			634	0.171146	0.184171	0.17658	0.164402	0.167123	0.163568	0.251956	0.261357	0.272248	0.147074	0.169653	0.169466			268	0.0709	0.0854	0.0348	0.1039	0.1295	0.0787	0.114	0.1232	0.107	0.149	0.116	0.1413			268	0.0513	0.027	0.0182	0.0844
634.2	0.205163	0.18667	0.180979	0.170292	0.172908	0.170484	0.359434	0.329719	0.349527	0.154861	0.18671	0.163921			634.2	0.169706	0.18262	0.175018	0.163023	0.165779	0.162268	0.249792	0.259468	0.270321	0.145945	0.16816	0.16804			268.4	0.0705	0.0858	0.0353	0.1037	0.1285	0.0794	0.1124	0.123	0.1061	0.1491	0.1161	0.1398			268.4	0.0504	0.0267	0.0183	0.0849
634.4	0.204009	0.18562	0.179948	0.16946	0.17194	0.169644	0.357883	0.328277	0.347969	0.153892	0.185603	0.1631			634.4	0.16882	0.181691	0.174058	0.162146	0.164854	0.161426	0.2486	0.258383	0.269132	0.145219	0.167129	0.167144			268.8	0.0706	0.0863	0.0347	0.1038	0.128	0.0785	0.1135	0.1226	0.1065	0.1482	0.1162	0.142			268.8	0.0506	0.0269	0.0185	0.0854
634.6	0.202631	0.184363	0.178671	0.168391	0.170776	0.168515	0.355905	0.326325	0.345944	0.152779	0.184253	0.162145			634.6	0.167706	0.180555	0.172827	0.160953	0.16373	0.160402	0.247095	0.256834	0.267808	0.144103	0.165759	0.165864			269.2	0.0709	0.0858	0.0352	0.1029	0.1287	0.0799	0.1129	0.1225	0.1063	0.1485	0.1152	0.1418			269.2	0.0512	0.0272	0.0183	0.0849
634.8	0.200956	0.182916	0.177191	0.166938	0.169428	0.167114	0.353564	0.323991	0.343544	0.151548	0.182854	0.160855			634.8	0.166374	0.1791	0.171258	0.15963	0.162296	0.159079	0.245359	0.255122	0.265807	0.142903	0.164499	0.164393			269.6	0.0707	0.0864	0.0352	0.1038	0.1275	0.0795	0.1132	0.1225	0.1059	0.1486	0.1156	0.1411			269.6	0.0507	0.0273	0.0184	0.085
635	0.200195	0.182142	0.176429	0.166359	0.168784	0.166477	0.352288	0.322667	0.34237	0.151005	0.18206	0.160164			635	0.165645	0.178365	0.170539	0.158936	0.161757	0.158435	0.244433	0.25411	0.264874	0.142259	0.163833	0.1638			270	0.0717	0.0855	0.035	0.1036	0.1276	0.0793	0.1132	0.1233	0.1068	0.1498	0.1151	0.1418			270	0.0524	0.027	0.0174	0.0857
635.2	0.198411	0.180626	0.174883	0.164988	0.167438	0.16509	0.350013	0.320186	0.340314	0.149733	0.180516	0.158973			635.2	0.164267	0.176892	0.16906	0.157643	0.160379	0.157253	0.242757	0.252266	0.263142	0.141051	0.162737	0.162541			270.4	0.0706	0.0864	0.035	0.1043	0.1288	0.0789	0.1141	0.1227	0.1059	0.1497	0.1164	0.1412			270.4	0.0513	0.026	0.0179	0.0848
635.4	0.197398	0.179661	0.173942	0.164009	0.166562	0.164194	0.348518	0.318809	0.338742	0.148945	0.179468	0.158103			635.4	0.163416	0.175971	0.168106	0.156809	0.159515	0.156516	0.24163	0.251117	0.261935	0.140337	0.161819	0.161612			270.8	0.0706	0.0865	0.0359	0.1034	0.1292	0.0792	0.1136	0.1237	0.1054	0.1491	0.1156	0.1411			270.8	0.0512	0.0271	0.0178	0.0858
635.6	0.196061	0.178471	0.172728	0.162859	0.165436	0.163113	0.346818	0.316907	0.33704	0.147884	0.178289	0.157099			635.6	0.162262	0.174787	0.16694	0.155714	0.158412	0.155513	0.240092	0.249568	0.260407	0.139468	0.160688	0.160541			271.2	0.0708	0.0857	0.0352	0.1045	0.1289	0.0799	0.1129	0.1239	0.1055	0.1489	0.116	0.1407			271.2	0.0512	0.0275	0.0187	0.0856
635.8	0.194338	0.17699	0.171208	0.161725	0.164077	0.161827	0.344419	0.315042	0.334839	0.146636	0.176651	0.155652			635.8	0.161012	0.173313	0.165545	0.154451	0.157169	0.154313	0.238279	0.247849	0.258549	0.13799	0.159543	0.159078			271.6	0.0712	0.0868	0.0356	0.1034	0.1281	0.0805	0.1133	0.1227	0.106	0.1489	0.1155	0.1409			271.6	0.0514	0.0265	0.0185	0.0853
636	0.193214	0.176039	0.170268	0.160858	0.163192	0.160987	0.34293	0.313637	0.333519	0.145886	0.175685	0.154694			636	0.160052	0.172388	0.164635	0.153621	0.156444	0.153533	0.237179	0.24657	0.257356	0.137115	0.158788	0.158149			272	0.0712	0.0863	0.0367	0.1031	0.1279	0.0793	0.1127	0.1225	0.1054	0.149	0.1154	0.141			272	0.0519	0.0267	0.0173	0.085
636.2	0.191918	0.174812	0.169081	0.159814	0.162126	0.159907	0.340977	0.312055	0.331702	0.144891	0.174516	0.153684			636.2	0.158965	0.171163	0.163545	0.152629	0.155477	0.152566	0.23554	0.245167	0.255804	0.136223	0.157753	0.157058			272.4	0.0712	0.0865	0.0356	0.1038	0.1276	0.08	0.1132	0.1225	0.1057	0.1502	0.1149	0.1421			272.4	0.0515	0.0276	0.019	0.0851
636.4	0.19024	0.173464	0.167583	0.158519	0.160856	0.158652	0.338531	0.309847	0.329579	0.143996	0.173236	0.152566			636.4	0.157766	0.169822	0.162185	0.151397	0.154167	0.151305	0.233756	0.24305	0.254105	0.13521	0.156598	0.155778			272.8	0.0711	0.0861	0.0346	0.1038	0.1286	0.0802	0.1138	0.1231	0.1048	0.1478	0.1158	0.1417			272.8	0.0513	0.0274	0.0179	0.0849
636.6	0.189435	0.172741	0.166883	0.157893	0.160182	0.158013	0.337579	0.308831	0.328346	0.143431	0.172604	0.151862			636.6	0.157122	0.169156	0.161483	0.150697	0.153524	0.150645	0.233041	0.242002	0.253091	0.134655	0.155908	0.155058			273.2	0.0718	0.0862	0.0355	0.1045	0.128	0.0803	0.113	0.1233	0.1059	0.1491	0.117	0.1409			273.2	0.0517	0.0277	0.0183	0.0847
636.8	0.187818	0.171337	0.165553	0.156503	0.15885	0.156685	0.335338	0.306893	0.326078	0.14224	0.171232	0.150732			636.8	0.155883	0.167778	0.160346	0.149363	0.15232	0.149324	0.231215	0.240311	0.251389	0.133388	0.154512	0.15377			273.6	0.0706	0.0862	0.0355	0.1034	0.1284	0.0801	0.1133	0.1239	0.1051	0.1479	0.1165	0.1415			273.6	0.0521	0.0266	0.0171	0.0856
637	0.186787	0.170454	0.164628	0.155675	0.157921	0.155842	0.33368	0.305533	0.324692	0.141355	0.170364	0.149908			637	0.155067	0.166857	0.159502	0.148608	0.151473	0.148463	0.23003	0.239411	0.2502	0.132605	0.153852	0.153092			274	0.0713	0.0865	0.0359	0.1042	0.1275	0.0808	0.1129	0.1238	0.1064	0.1491	0.116	0.1412			274	0.0524	0.0277	0.0183	0.0855
637.2	0.185454	0.169321	0.163473	0.154681	0.156734	0.154785	0.331616	0.303883	0.323007	0.140172	0.169295	0.148854			637.2	0.154006	0.165696	0.158461	0.147589	0.150475	0.147447	0.228529	0.238206	0.248664	0.131571	0.152902	0.151984			274.4	0.0729	0.087	0.0357	0.1046	0.1286	0.0812	0.1133	0.122	0.1052	0.1489	0.1168	0.1416			274.4	0.052	0.0283	0.0181	0.0858
637.4	0.183912	0.167953	0.162052	0.153479	0.155398	0.153526	0.329575	0.301683	0.32101	0.138906	0.168	0.147585			637.4	0.152766	0.164425	0.1571	0.146458	0.149251	0.146175	0.227144	0.236472	0.246796	0.130486	0.151688	0.150902			274.8	0.0721	0.0864	0.0355	0.1036	0.1287	0.0811	0.1127	0.1237	0.1052	0.1492	0.1149	0.1417			274.8	0.0522	0.0278	0.0177	0.0858
637.6	0.182935	0.167085	0.161145	0.152593	0.154542	0.152628	0.327972	0.300244	0.319661	0.138279	0.167172	0.146816			637.6	0.152017	0.163437	0.15631	0.145614	0.148436	0.145357	0.225997	0.235258	0.245628	0.129625	0.150937	0.150054			275.2	0.0718	0.0874	0.0361	0.1041	0.1282	0.0806	0.1136	0.1222	0.1057	0.1489	0.1162	0.1416			275.2	0.0514	0.0273	0.0182	0.0862
637.8	0.181735	0.165953	0.160082	0.151502	0.153558	0.151544	0.325987	0.298517	0.317947	0.137446	0.166088	0.145751			637.8	0.150942	0.162284	0.155295	0.144569	0.147401	0.144308	0.22456	0.233637	0.244189	0.128752	0.150052	0.149016			275.6	0.0716	0.0866	0.0364	0.1036	0.1292	0.0817	0.1126	0.1226	0.1055	0.1487	0.1166	0.1413			275.6	0.0519	0.0268	0.0187	0.0857
638	0.180117	0.164513	0.158736	0.15033	0.152225	0.150286	0.323625	0.296692	0.315636	0.13629	0.164819	0.144462			638	0.14957	0.16084	0.154172	0.14344	0.146216	0.143075	0.222709	0.231899	0.242645	0.127598	0.148842	0.147925			276	0.0714	0.0874	0.0362	0.1045	0.1289	0.0808	0.1131	0.1224	0.1054	0.149	0.116	0.1411			276	0.0522	0.0264	0.0185	0.0843
638.2	0.179231	0.163785	0.158028	0.149625	0.151498	0.149663	0.32266	0.295836	0.314513	0.135706	0.164221	0.143835			638.2	0.14892	0.160214	0.153538	0.142922	0.145536	0.142504	0.221878	0.231285	0.241847	0.127034	0.148364	0.147264			276.4	0.0723	0.0871	0.0366	0.1033	0.1287	0.0808	0.1129	0.1238	0.1043	0.1488	0.1153	0.1408			276.4	0.0518	0.0273	0.0186	0.0856
638.4	0.177882	0.162461	0.156783	0.148418	0.1502	0.14845	0.320546	0.293984	0.312195	0.13464	0.162909	0.142663			638.4	0.147624	0.158886	0.152203	0.141682	0.144249	0.141258	0.220443	0.229562	0.23997	0.125901	0.147235	0.146065			276.8	0.0723	0.0882	0.0354	0.1039	0.1282	0.081	0.1138	0.1235	0.1052	0.1492	0.1162	0.1419			276.8	0.0519	0.0276	0.0185	0.086
638.6	0.17685	0.161586	0.155897	0.147628	0.149294	0.147575	0.319077	0.292713	0.310785	0.133936	0.162025	0.14203			638.6	0.14679	0.157961	0.1514	0.140897	0.143442	0.140422	0.219245	0.228401	0.238833	0.124947	0.146375	0.145346			277.2	0.0725	0.0879	0.0369	0.1045	0.1283	0.0812	0.1135	0.1227	0.1044	0.1498	0.1159	0.1412			277.2	0.052	0.0282	0.0181	0.0868
638.8	0.175577	0.160484	0.154857	0.146642	0.148199	0.146492	0.317159	0.291277	0.30896	0.132978	0.160842	0.141321			638.8	0.145789	0.156839	0.150374	0.139892	0.142462	0.139396	0.21812	0.227152	0.23752	0.12382	0.145394	0.144587			277.6	0.0716	0.0873	0.0357	0.1038	0.1276	0.0805	0.1136	0.1224	0.1055	0.149	0.115	0.1421			277.6	0.0521	0.0278	0.0186	0.0857
639	0.174108	0.159121	0.153593	0.145392	0.147003	0.145177	0.315088	0.289144	0.30684	0.131665	0.159732	0.140374			639	0.144515	0.15562	0.149155	0.138631	0.141279	0.138162	0.216467	0.225501	0.235757	0.122928	0.144235	0.143525			278	0.0722	0.0869	0.0361	0.1038	0.1286	0.0811	0.1127	0.123	0.1042	0.1491	0.115	0.1407			278	0.0523	0.0283	0.0184	0.0865
639.2	0.173224	0.158146	0.152715	0.144619	0.146196	0.144377	0.313616	0.287805	0.305346	0.130915	0.158912	0.139665			639.2	0.143739	0.154793	0.14829	0.137871	0.1404	0.137381	0.215455	0.224296	0.234581	0.122156	0.143375	0.142683			278.4	0.0728	0.0875	0.0363	0.1049	0.128	0.0824	0.1131	0.1224	0.1053	0.1492	0.1161	0.1408			278.4	0.0528	0.0275	0.0187	0.0859
639.4	0.172012	0.157042	0.151595	0.143596	0.145202	0.143381	0.311836	0.286227	0.303845	0.130005	0.157784	0.138725			639.4	0.14276	0.153727	0.147177	0.136838	0.139372	0.136356	0.214301	0.222795	0.233463	0.121246	0.142288	0.14163			278.8	0.0726	0.087	0.0363	0.1042	0.1292	0.0814	0.113	0.1238	0.1042	0.1486	0.1164	0.141			278.8	0.0522	0.0282	0.0187	0.0857
639.6	0.170652	0.155594	0.150395	0.142417	0.144049	0.142138	0.309876	0.284342	0.302043	0.128937	0.156432	0.137449			639.6	0.141652	0.152306	0.145934	0.135648	0.138226	0.135225	0.212814	0.221296	0.231798	0.120198	0.141113	0.140474			279.2	0.0724	0.0877	0.0361	0.1047	0.1285	0.0823	0.1133	0.1231	0.1048	0.1492	0.1162	0.1425			279.2	0.0524	0.028	0.0181	0.0858
639.8	0.169948	0.15499	0.149703	0.141785	0.143578	0.141521	0.308835	0.283357	0.301054	0.128438	0.155776	0.136968			639.8	0.141005	0.151598	0.145323	0.135132	0.137613	0.134589	0.212016	0.220523	0.231004	0.119751	0.140526	0.139984			279.6	0.0722	0.0874	0.0367	0.1041	0.1289	0.0826	0.1138	0.1236	0.1045	0.1487	0.116	0.1415			279.6	0.0519	0.0281	0.0184	0.0861
640	0.168542	0.153708	0.14842	0.140701	0.14239	0.140381	0.30674	0.281304	0.299142	0.127362	0.154356	0.135797			640	0.139722	0.150288	0.14404	0.134055	0.136431	0.133566	0.210693	0.218894	0.229177	0.118694	0.139468	0.138922			280	0.0724	0.0875	0.0357	0.1035	0.1287	0.0822	0.1137	0.1229	0.1049	0.1496	0.1157	0.1415			280	0.0528	0.0289	0.0187	0.0862
640.2	0.167582	0.152835	0.147568	0.139941	0.141668	0.139624	0.305597	0.280124	0.297728	0.126589	0.1534	0.135072			640.2	0.13892	0.14943	0.143164	0.13321	0.135698	0.132868	0.209714	0.2177	0.228198	0.117944	0.138546	0.137924			280.4	0.0723	0.0879	0.0362	0.1048	0.1291	0.0825	0.113	0.1232	0.1045	0.1493	0.1152	0.1416			280.4	0.053	0.028	0.019	0.0863
640.4	0.166413	0.151727	0.146502	0.138942	0.140739	0.138613	0.304061	0.278598	0.295954	0.125689	0.152231	0.134285			640.4	0.137919	0.148361	0.142087	0.132118	0.134733	0.131916	0.208383	0.216247	0.227001	0.117019	0.137397	0.137203			280.8	0.0725	0.0871	0.0366	0.1042	0.1293	0.0826	0.1138	0.1231	0.1044	0.1475	0.1172	0.1408			280.8	0.0522	0.028	0.0201	0.0862
640.6	0.165052	0.150383	0.145312	0.137735	0.139573	0.137456	0.301741	0.27702	0.2938	0.124701	0.150994	0.132996			640.6	0.136743	0.147108	0.14105	0.130982	0.133623	0.130879	0.206614	0.214563	0.225419	0.116006	0.136351	0.135835			281.2	0.073	0.0881	0.0359	0.1039	0.1296	0.0819	0.1137	0.1228	0.1049	0.1486	0.1158	0.1411			281.2	0.0531	0.0279	0.019	0.0856
640.8	0.164177	0.149487	0.144546	0.136933	0.138801	0.136702	0.300439	0.275691	0.292493	0.123947	0.150029	0.132309			640.8	0.135889	0.146337	0.140199	0.130322	0.132901	0.130123	0.205686	0.213547	0.224409	0.11549	0.135459	0.135049			281.6	0.0726	0.0881	0.0373	0.1046	0.1285	0.0826	0.1138	0.124	0.1046	0.1495	0.1162	0.1407			281.6	0.0522	0.0272	0.0185	0.0857
641	0.163028	0.148345	0.143509	0.135972	0.13785	0.135789	0.298942	0.274222	0.29079	0.123062	0.148871	0.13154			641	0.134887	0.145291	0.139186	0.129508	0.13201	0.129198	0.204636	0.212357	0.223016	0.114684	0.134402	0.134166			282	0.0728	0.0889	0.0359	0.1042	0.1279	0.0822	0.1134	0.1231	0.1051	0.1496	0.1158	0.1425			282	0.0531	0.0286	0.0188	0.0859
641.2	0.161693	0.147136	0.142316	0.134814	0.136704	0.134586	0.297277	0.27218	0.289274	0.122095	0.147474	0.130369			641.2	0.133895	0.144153	0.137908	0.128338	0.130923	0.128152	0.203227	0.211106	0.221368	0.11375	0.13321	0.133023			282.4	0.073	0.0881	0.0379	0.1043	0.1279	0.0825	0.1137	0.1238	0.1037	0.15	0.1158	0.1408			282.4	0.0518	0.0285	0.0189	0.0865
641.4	0.161101	0.146578	0.141747	0.134255	0.136134	0.133983	0.296171	0.27139	0.288248	0.12139	0.146731	0.129846			641.4	0.13331	0.143498	0.137337	0.127722	0.130339	0.127593	0.202582	0.21029	0.220608	0.113064	0.132603	0.132408			282.8	0.073	0.0884	0.0361	0.1044	0.1282	0.0819	0.1136	0.1234	0.1048	0.149	0.1155	0.141			282.8	0.0524	0.0273	0.0191	0.086
641.6	0.159761	0.145185	0.140498	0.133196	0.134952	0.132888	0.294165	0.269508	0.286398	0.120374	0.14563	0.128764			641.6	0.132186	0.142399	0.136239	0.126647	0.129296	0.126517	0.200933	0.208661	0.219157	0.111956	0.131489	0.131375			283.2	0.0732	0.0882	0.0363	0.1046	0.1287	0.0829	0.1132	0.1225	0.1041	0.1491	0.1155	0.1411			283.2	0.0531	0.0287	0.0189	0.0871
641.8	0.158915	0.144349	0.139708	0.132384	0.134287	0.132203	0.292848	0.268273	0.285136	0.119702	0.144953	0.12797			641.8	0.13144	0.141604	0.135464	0.12589	0.128524	0.125759	0.199987	0.207638	0.218097	0.111438	0.130808	0.130664			283.6	0.0725	0.0889	0.0366	0.1055	0.1278	0.083	0.1126	0.1227	0.1046	0.1486	0.1168	0.1402			283.6	0.0528	0.0288	0.0184	0.0862
642	0.157784	0.143291	0.138679	0.131345	0.133409	0.131293	0.291018	0.266702	0.283595	0.118956	0.144089	0.126806			642	0.130485	0.140611	0.134497	0.125027	0.127511	0.124828	0.198638	0.20632	0.21659	0.110585	0.130046	0.129558			284	0.0737	0.0885	0.0372	0.1053	0.1288	0.0836	0.1132	0.1235	0.1041	0.1482	0.1162	0.1417			284	0.0533	0.0285	0.0188	0.0864
642.2	0.156453	0.142052	0.13755	0.13021	0.132354	0.130244	0.288943	0.264922	0.281832	0.118041	0.142915	0.125796			642.2	0.1295	0.13934	0.133283	0.124069	0.126377	0.12371	0.197294	0.205008	0.215015	0.109438	0.129044	0.128502			284.4	0.0727	0.0896	0.0368	0.1042	0.1295	0.0831	0.1143	0.1237	0.1038	0.1497	0.1166	0.1413			284.4	0.0522	0.0279	0.0195	0.0866
642.4	0.155559	0.141304	0.136802	0.129526	0.131583	0.129524	0.287643	0.263629	0.280599	0.117292	0.142072	0.12507			642.4	0.128811	0.13851	0.13257	0.123364	0.125673	0.123037	0.196201	0.204181	0.213886	0.108739	0.128256	0.127758			284.8	0.0728	0.089	0.0377	0.1051	0.1283	0.083	0.1137	0.1229	0.1044	0.149	0.1155	0.1411			284.8	0.0524	0.0287	0.0193	0.0865
642.6	0.154415	0.140277	0.135888	0.128645	0.130641	0.128605	0.286092	0.26197	0.278923	0.116351	0.141131	0.124063			642.6	0.127881	0.137594	0.131728	0.122541	0.124799	0.122211	0.19493	0.203142	0.212377	0.107814	0.127405	0.126902			285.2	0.0732	0.0891	0.037	0.1045	0.1279	0.0831	0.1135	0.1226	0.1044	0.1487	0.1159	0.1414			285.2	0.0526	0.0285	0.019	0.0871
642.8	0.153062	0.139134	0.134784	0.127505	0.129484	0.127599	0.284053	0.26005	0.2768	0.1153	0.140037	0.123129			642.8	0.126742	0.136518	0.130652	0.121444	0.123834	0.1212	0.193564	0.201586	0.210588	0.106572	0.126276	0.125821			285.6	0.0743	0.0882	0.0372	0.1044	0.1283	0.0834	0.1137	0.1222	0.1048	0.1481	0.1151	0.1411			285.6	0.0527	0.028	0.0191	0.0878
643	0.15241	0.138475	0.134302	0.126962	0.128883	0.127075	0.283005	0.259115	0.275764	0.11471	0.139328	0.122615			643	0.126177	0.136006	0.130127	0.120946	0.123312	0.120762	0.192905	0.200683	0.209837	0.105959	0.1257	0.125115			286	0.0735	0.0888	0.0366	0.1049	0.1288	0.0834	0.1138	0.1235	0.1042	0.1484	0.1156	0.1419			286	0.0534	0.0286	0.0193	0.0868
643.2	0.151044	0.137231	0.133018	0.125817	0.127721	0.125977	0.281179	0.257454	0.273852	0.113698	0.138323	0.121575			643.2	0.125131	0.134855	0.128903	0.119912	0.122181	0.119664	0.191508	0.199052	0.208339	0.105146	0.12479	0.124177			286.4	0.0733	0.088	0.0375	0.1046	0.1281	0.083	0.1126	0.1231	0.1049	0.149	0.1155	0.1401			286.4	0.0535	0.0276	0.0193	0.0865
643.4	0.150246	0.136387	0.132319	0.125114	0.126977	0.125246	0.279918	0.256128	0.272641	0.113021	0.137816	0.120904			643.4	0.124438	0.134068	0.128219	0.11923	0.121469	0.118947	0.190597	0.197986	0.207231	0.104393	0.124181	0.123554			286.8	0.0736	0.0889	0.0375	0.1045	0.1287	0.083	0.1139	0.1236	0.1039	0.1494	0.116	0.1411			286.8	0.0535	0.0294	0.0178	0.0873
643.6	0.14921	0.135377	0.1314	0.124295	0.126012	0.124395	0.278328	0.254595	0.271129	0.112157	0.137066	0.119794			643.6	0.123616	0.133178	0.127347	0.118426	0.120641	0.118112	0.189458	0.196911	0.205884	0.103489	0.123511	0.1224			287.2	0.0731	0.0885	0.0376	0.1063	0.1275	0.0838	0.1132	0.1241	0.1039	0.1498	0.1159	0.1412			287.2	0.0524	0.0293	0.0187	0.0874
643.8	0.147875	0.13426	0.130295	0.1232	0.124923	0.123332	0.276462	0.252678	0.269311	0.111247	0.135908	0.118765			643.8	0.122593	0.132015	0.126258	0.11743	0.119613	0.117209	0.188133	0.19566	0.20456	0.10246	0.122408	0.121305			287.6	0.0743	0.0896	0.0374	0.1044	0.129	0.083	0.1138	0.1234	0.1045	0.1493	0.1169	0.1412			287.6	0.054	0.0282	0.0195	0.0867
644	0.147003	0.133522	0.129575	0.122553	0.124249	0.122609	0.275113	0.251626	0.268059	0.110576	0.135284	0.118001			644	0.121934	0.131292	0.125533	0.116707	0.118962	0.116558	0.187191	0.194805	0.203604	0.101684	0.121945	0.120557			288	0.0741	0.0887	0.0377	0.105	0.128	0.0836	0.1141	0.1232	0.1036	0.1499	0.1154	0.141			288	0.0529	0.0286	0.0198	0.0867
644.2	0.145932	0.132635	0.128644	0.121687	0.123322	0.121717	0.273336	0.2502	0.266557	0.109515	0.134473	0.117071			644.2	0.121153	0.130382	0.124603	0.115826	0.118113	0.115723	0.185906	0.193648	0.20233	0.100703	0.121177	0.119675			288.4	0.074	0.0892	0.0373	0.1047	0.1282	0.0831	0.1124	0.1235	0.1045	0.148	0.1151	0.1412			288.4	0.0538	0.0287	0.0194	0.0872
644.4	0.144717	0.131438	0.127559	0.120631	0.122231	0.120674	0.271392	0.248422	0.264528	0.108325	0.133555	0.116216			644.4	0.120107	0.129259	0.123567	0.114957	0.117083	0.114701	0.184576	0.192032	0.200829	0.0996006	0.120155	0.118732			288.8	0.0739	0.0888	0.0378	0.1049	0.1278	0.0846	0.1128	0.1231	0.104	0.1489	0.1155	0.1416			288.8	0.0537	0.0288	0.0181	0.0873
644.6	0.144087	0.130831	0.127045	0.120168	0.121755	0.120143	0.27043	0.247376	0.263661	0.107926	0.132906	0.115665			644.6	0.119635	0.128701	0.123007	0.114581	0.11659	0.114219	0.183713	0.191355	0.200046	0.0990558	0.119633	0.118216			289.2	0.0739	0.0892	0.0375	0.1054	0.129	0.0842	0.1132	0.124	0.1037	0.1494	0.1156	0.1414			289.2	0.0535	0.0294	0.0193	0.0877
644.8	0.142808	0.129765	0.126015	0.119085	0.120774	0.119112	0.268479	0.245626	0.26182	0.107036	0.131524	0.114622			644.8	0.118566	0.127632	0.121992	0.113609	0.115632	0.113247	0.18232	0.189965	0.198381	0.0984549	0.118282	0.117125			289.6	0.0737	0.0893	0.0378	0.1046	0.128	0.0839	0.1135	0.1242	0.1049	0.1486	0.1163	0.1418			289.6	0.0537	0.0286	0.0202	0.0877
645	0.141969	0.129023	0.125331	0.118435	0.120095	0.118378	0.267141	0.244415	0.260562	0.10636	0.130696	0.114029			645	0.117876	0.126948	0.121328	0.112986	0.114933	0.112592	0.181392	0.189106	0.197452	0.0978353	0.117501	0.116473			290	0.0746	0.0908	0.0379	0.1041	0.1288	0.0841	0.113	0.1229	0.104	0.1498	0.1162	0.142			290	0.054	0.0282	0.0186	0.0879
645.2	0.141004	0.12814	0.124468	0.117632	0.119185	0.117456	0.265609	0.242909	0.258937	0.105636	0.129763	0.113261			645.2	0.117048	0.125977	0.120471	0.112144	0.114123	0.111738	0.180251	0.187892	0.196427	0.097251	0.116459	0.115649			290.4	0.075	0.0903	0.0368	0.1046	0.1285	0.0842	0.1133	0.1225	0.1048	0.149	0.1159	0.1413			290.4	0.0534	0.0294	0.0196	0.087
645.4	0.13981	0.127113	0.123361	0.116605	0.118144	0.116447	0.263554	0.241236	0.256865	0.10448	0.128547	0.112308			645.4	0.115968	0.124932	0.119453	0.111117	0.113174	0.11082	0.178839	0.186412	0.194987	0.0963465	0.115467	0.114569			290.8	0.0746	0.089	0.0376	0.1052	0.1288	0.0843	0.1135	0.1216	0.1047	0.149	0.1151	0.1408			290.8	0.0545	0.0282	0.0194	0.0875
645.6	0.138989	0.126373	0.122661	0.11592	0.117455	0.115751	0.26225	0.240261	0.25564	0.103874	0.127887	0.111739			645.6	0.115282	0.12421	0.118782	0.110433	0.112503	0.110161	0.177972	0.185497	0.194272	0.0957664	0.114838	0.113947			291.2	0.075	0.0898	0.0382	0.1042	0.1286	0.0848	0.1139	0.1229	0.104	0.1498	0.1158	0.1413			291.2	0.0538	0.0291	0.0186	0.0877
645.8	0.138048	0.125464	0.121786	0.115128	0.116656	0.11494	0.260527	0.238723	0.254035	0.103223	0.126825	0.110885			645.8	0.114478	0.12331	0.117904	0.109604	0.111603	0.109328	0.176774	0.184174	0.193164	0.0951094	0.113913	0.112981			291.6	0.0739	0.09	0.0377	0.1049	0.1294	0.0846	0.1129	0.1224	0.1037	0.1484	0.1156	0.1421			291.6	0.0545	0.0289	0.019	0.0873
646	0.136872	0.124391	0.120654	0.114139	0.115656	0.113957	0.25863	0.237033	0.25225	0.10216	0.125764	0.10977			646	0.113481	0.122194	0.11694	0.108747	0.110622	0.108264	0.175352	0.183019	0.19168	0.0942985	0.113	0.112085			292	0.0739	0.0905	0.0378	0.1044	0.128	0.0853	0.1146	0.1234	0.1039	0.1495	0.1164	0.1416			292	0.0535	0.0281	0.0195	0.0874
646.2	0.136284	0.123929	0.120056	0.113703	0.115153	0.113468	0.257768	0.236338	0.25141	0.101679	0.125492	0.109372			646.2	0.113046	0.121633	0.116462	0.10824	0.110175	0.1078	0.174676	0.182464	0.190915	0.0938161	0.112638	0.111642			292.4	0.0742	0.0894	0.038	0.105	0.1278	0.0846	0.1128	0.1235	0.1042	0.1492	0.1154	0.1411			292.4	0.0536	0.0289	0.0194	0.0876
646.4	0.135111	0.1229	0.119154	0.11265	0.114152	0.112448	0.255607	0.234595	0.249681	0.100622	0.124306	0.108603			646.4	0.112133	0.120569	0.11557	0.107355	0.109311	0.10687	0.173065	0.181161	0.189529	0.092818	0.11169	0.110534			292.8	0.0742	0.0906	0.0376	0.1055	0.1281	0.0848	0.1132	0.1228	0.1042	0.1494	0.116	0.1418			292.8	0.0536	0.0288	0.0196	0.0876
646.6	0.134282	0.1222	0.118401	0.111987	0.113462	0.111826	0.254228	0.233587	0.248558	0.0999298	0.123446	0.107982			646.6	0.11146	0.119908	0.114911	0.106754	0.108694	0.106274	0.172119	0.180267	0.18859	0.0922816	0.110992	0.10984			293.2	0.0748	0.0903	0.0386	0.1051	0.1279	0.0846	0.1135	0.1233	0.104	0.1478	0.1156	0.1415			293.2	0.0542	0.029	0.0187	0.0873
646.8	0.133254	0.121362	0.117517	0.111106	0.112622	0.111064	0.252581	0.232208	0.246951	0.0991328	0.122458	0.107435			646.8	0.110611	0.119038	0.114143	0.105981	0.107894	0.10549	0.170996	0.178879	0.187361	0.0916911	0.110028	0.109146			293.6	0.0743	0.0905	0.0376	0.1056	0.1294	0.0846	0.1126	0.1231	0.1041	0.1491	0.1157	0.1405			293.6	0.0545	0.0297	0.0199	0.0883
647	0.132148	0.120316	0.116382	0.110188	0.111683	0.110144	0.250529	0.230443	0.245269	0.0982721	0.121412	0.1066			647	0.109695	0.11802	0.113022	0.105075	0.106924	0.104552	0.169478	0.177634	0.185728	0.0908157	0.109066	0.108406			294	0.0746	0.0893	0.038	0.1049	0.1287	0.0856	0.1138	0.1225	0.1036	0.1491	0.1153	0.1412			294	0.0537	0.0297	0.0193	0.0866
647.2	0.131378	0.119612	0.115708	0.109582	0.111076	0.109539	0.249361	0.229291	0.243941	0.0977295	0.120609	0.105982			647.2	0.109103	0.117287	0.11243	0.104505	0.106297	0.103914	0.168709	0.176584	0.184695	0.0903208	0.108318	0.107916			294.4	0.075	0.0906	0.0381	0.1053	0.1283	0.0854	0.1135	0.1231	0.1048	0.1498	0.1162	0.1416			294.4	0.0546	0.0288	0.0191	0.0875
647.4	0.130426	0.118759	0.114958	0.108849	0.110361	0.108809	0.24784	0.227719	0.242343	0.0972468	0.119717	0.105208			647.4	0.108257	0.116434	0.111706	0.103744	0.105604	0.10321	0.167655	0.175339	0.183581	0.089774	0.107546	0.107199			294.8	0.0754	0.0905	0.0386	0.1051	0.1281	0.0853	0.1133	0.1237	0.1033	0.149	0.1153	0.1406			294.8	0.054	0.0286	0.0198	0.0873
647.6	0.129325	0.117728	0.113949	0.107939	0.109471	0.107926	0.245872	0.22628	0.240298	0.0965808	0.118435	0.104417			647.6	0.107299	0.11543	0.110784	0.10277	0.104693	0.102366	0.16633	0.174097	0.182097	0.0892687	0.106532	0.106186			295.2	0.0758	0.0913	0.0384	0.1054	0.1287	0.0849	0.1137	0.1244	0.1046	0.149	0.1164	0.1409			295.2	0.0538	0.0291	0.0197	0.0876
647.8	0.128549	0.117024	0.113292	0.107287	0.108832	0.107336	0.24471	0.225179	0.239073	0.0959989	0.117995	0.103935			647.8	0.1067	0.114753	0.110163	0.102126	0.104123	0.10173	0.165656	0.17309	0.181238	0.0887157	0.106051	0.105644			295.6	0.075	0.0906	0.039	0.1052	0.128	0.0854	0.1134	0.123	0.1037	0.1492	0.1155	0.1411			295.6	0.0542	0.0293	0.019	0.0869
648	0.127607	0.11618	0.112481	0.106505	0.10803	0.106583	0.24323	0.223829	0.237491	0.095447	0.117403	0.10327			648	0.105938	0.113895	0.109367	0.101329	0.103384	0.101011	0.16459	0.172007	0.180145	0.0881376	0.105507	0.1049			296	0.0754	0.0907	0.0379	0.1056	0.1288	0.0859	0.1129	0.1239	0.1041	0.1487	0.1157	0.1415			296	0.0536	0.0298	0.0192	0.0874
648.2	0.1265	0.115161	0.111361	0.105707	0.107071	0.105673	0.2414	0.222209	0.235733	0.0946144	0.116389	0.102218			648.2	0.105087	0.112899	0.108376	0.100455	0.102677	0.100159	0.163328	0.170529	0.178663	0.0874224	0.104663	0.103759			296.4	0.0752	0.0896	0.0386	0.1055	0.1276	0.0864	0.1133	0.1234	0.1042	0.1486	0.1162	0.1423			296.4	0.0541	0.0288	0.0197	0.0874
648.4	0.126001	0.114619	0.110858	0.1052	0.106666	0.105304	0.240454	0.22134	0.234886	0.0939858	0.115891	0.101832			648.4	0.104632	0.112466	0.107937	0.100025	0.102249	0.0998257	0.162669	0.169883	0.177919	0.0868755	0.104315	0.103306			296.8	0.0758	0.0906	0.0384	0.1054	0.1295	0.0856	0.1134	0.1228	0.1044	0.1498	0.1155	0.1411			296.8	0.0542	0.0292	0.02	0.089
648.6	0.124929	0.113555	0.109928	0.104311	0.105742	0.104437	0.238869	0.219451	0.233123	0.0932767	0.115063	0.100874			648.6	0.103779	0.111472	0.107071	0.099221	0.10136	0.0989871	0.161436	0.168352	0.176522	0.0861436	0.103288	0.102221			297.2	0.0762	0.0909	0.0391	0.1056	0.1283	0.0864	0.1141	0.1232	0.1043	0.1491	0.1156	0.1411			297.2	0.0545	0.0295	0.0199	0.0882
648.8	0.124213	0.112883	0.109247	0.103664	0.105166	0.103857	0.237679	0.218293	0.231985	0.0926836	0.114292	0.100334			648.8	0.103185	0.11086	0.10643	0.0986458	0.100817	0.0984343	0.160519	0.167231	0.175483	0.0855885	0.102758	0.101687			297.6	0.0751	0.0912	0.0388	0.1059	0.1286	0.0862	0.1129	0.1231	0.1051	0.1488	0.1169	0.1419			297.6	0.0538	0.0301	0.0194	0.0874
649	0.123279	0.112036	0.10847	0.102873	0.104413	0.103143	0.236188	0.21715	0.2306	0.0919371	0.113628	0.0997855			649	0.10247	0.110045	0.1057	0.0979679	0.100172	0.097787	0.159612	0.166183	0.174375	0.0848337	0.102168	0.101144			298	0.0752	0.0914	0.0395	0.1048	0.1285	0.0864	0.1127	0.1238	0.1041	0.1484	0.1158	0.1406			298	0.0546	0.0293	0.02	0.0888
649.2	0.122214	0.111116	0.107585	0.102025	0.103577	0.102366	0.234139	0.21544	0.228684	0.0911831	0.112629	0.0990802			649.2	0.101545	0.109279	0.104782	0.0971536	0.0992658	0.0970249	0.158286	0.164817	0.173022	0.0840477	0.101228	0.10034			298.4	0.075	0.0904	0.0389	0.106	0.1291	0.0865	0.1137	0.123	0.1044	0.1487	0.1161	0.1416			298.4	0.0542	0.0304	0.0194	0.0876
649.4	0.121569	0.110457	0.106952	0.10144	0.102999	0.101823	0.232794	0.214154	0.227426	0.0907153	0.111956	0.0984004			649.4	0.101017	0.10868	0.104186	0.0966053	0.0986795	0.0964351	0.157446	0.163796	0.172002	0.0835591	0.100591	0.0998764			298.8	0.0751	0.0911	0.0396	0.1056	0.1288	0.0866	0.1136	0.1237	0.1042	0.1489	0.1156	0.1411			298.8	0.0546	0.0301	0.0207	0.0886
649.6	0.120748	0.109604	0.10624	0.100754	0.102281	0.101165	0.231228	0.212648	0.225874	0.0900567	0.1112	0.0975988			649.6	0.100308	0.107928	0.103402	0.0958812	0.0979464	0.0957209	0.156312	0.162772	0.170771	0.0830746	0.0999447	0.0992902			299.2	0.0758	0.0905	0.0385	0.1057	0.129	0.0869	0.114	0.1227	0.1034	0.1486	0.1157	0.1417			299.2	0.0543	0.0286	0.0195	0.0883
649.8	0.119653	0.108648	0.105419	0.0999155	0.101475	0.100383	0.229327	0.210762	0.223989	0.0893345	0.110287	0.0967644			649.8	0.0995115	0.107059	0.102506	0.0950434	0.0970706	0.0948788	0.154882	0.161577	0.16942	0.0824529	0.0991876	0.0986335			299.6	0.0757	0.0913	0.0396	0.1053	0.1275	0.0855	0.1133	0.123	0.1036	0.1493	0.1154	0.1417			299.6	0.0535	0.0298	0.0193	0.0886
650	0.119071	0.108097	0.10487	0.0993326	0.100904	0.0997714	0.228169	0.209716	0.222862	0.0888013	0.109699	0.0962464			650	0.0990235	0.106498	0.101933	0.0945297	0.0965288	0.0943485	0.154175	0.160794	0.168657	0.0819103	0.0987025	0.0980536			300	0.0767	0.0918	0.0393	0.1061	0.1281	0.0863	0.1137	0.1226	0.1038	0.1485	0.1157	0.1419			300	0.0546	0.0299	0.0203	0.0871
																														300.4	0.076	0.0918	0.0393	0.1056	0.1287	0.0867	0.1132	0.1232	0.1047	0.1498	0.1171	0.1417			300.4	0.0555	0.0293	0.0189	0.088
																														300.8	0.0749	0.0912	0.0384	0.1059	0.128	0.0863	0.1139	0.1237	0.1031	0.1487	0.1153	0.1419			300.8	0.0554	0.0293	0.0198	0.0882
																														301.2	0.0765	0.091	0.0396	0.1057	0.1279	0.0869	0.1137	0.1228	0.1044	0.1478	0.1164	0.1414			301.2	0.0542	0.029	0.0198	0.0892
																														301.6	0.0756	0.0918	0.0394	0.1057	0.1297	0.087	0.1133	0.123	0.1038	0.1486	0.1155	0.1414			301.6	0.0551	0.03	0.0207	0.088
																														302	0.076	0.0913	0.0404	0.1049	0.1291	0.087	0.1132	0.1222	0.1037	0.1481	0.1162	0.1414			302	0.0544	0.0293	0.0205	0.0889
																														302.4	0.0768	0.0919	0.0395	0.1051	0.1285	0.0855	0.1139	0.1226	0.104	0.1489	0.115	0.1419			302.4	0.0548	0.0303	0.0203	0.0886
																														302.8	0.0762	0.0918	0.0401	0.1053	0.1274	0.0877	0.1143	0.1242	0.1042	0.1491	0.1157	0.1418			302.8	0.0552	0.0301	0.0193	0.0886
																														303.2	0.0768	0.0923	0.039	0.1059	0.1285	0.0867	0.1129	0.1233	0.1042	0.1483	0.1158	0.1412			303.2	0.0552	0.0299	0.02	0.0885
																														303.6	0.0757	0.0918	0.0394	0.1058	0.1284	0.0869	0.1132	0.1238	0.1042	0.1491	0.1169	0.1405			303.6	0.055	0.0297	0.0204	0.0886
																														304	0.0761	0.0918	0.0395	0.107	0.1291	0.0874	0.1134	0.1236	0.1041	0.1483	0.1151	0.1412			304	0.0553	0.0307	0.0198	0.0891
																														304.4	0.0771	0.0915	0.0401	0.1052	0.1286	0.0874	0.1135	0.1231	0.1042	0.1499	0.1155	0.142			304.4	0.0547	0.0292	0.0206	0.088
																														304.8	0.0763	0.0923	0.0399	0.1053	0.1293	0.088	0.1131	0.1232	0.1049	0.149	0.1166	0.141			304.8	0.0556	0.0301	0.02	0.0887
																														305.2	0.0771	0.0918	0.0397	0.1058	0.1285	0.0874	0.1133	0.1239	0.1044	0.1491	0.116	0.1418			305.2	0.0546	0.0288	0.0201	0.0886
																														305.6	0.0768	0.0927	0.04	0.1061	0.1278	0.088	0.1135	0.1239	0.1042	0.1486	0.1163	0.1411			305.6	0.0556	0.0303	0.0203	0.0886
																														306	0.0757	0.0919	0.0398	0.1058	0.128	0.0873	0.1133	0.1241	0.1043	0.1481	0.1157	0.1417			306	0.0552	0.0304	0.0206	0.0892
																														306.4	0.0771	0.0918	0.0395	0.1057	0.1289	0.0873	0.1135	0.1233	0.1036	0.149	0.1155	0.1405			306.4	0.0542	0.0303	0.0195	0.0888
																														306.8	0.0763	0.0917	0.0402	0.1053	0.129	0.0878	0.1139	0.1223	0.1036	0.1492	0.1153	0.1413			306.8	0.0551	0.0303	0.0201	0.0893
																														307.2	0.0769	0.0924	0.0394	0.1058	0.1285	0.088	0.1133	0.123	0.1041	0.148	0.116	0.1414			307.2	0.0555	0.0295	0.0199	0.0883
																														307.6	0.0777	0.0919	0.0398	0.1057	0.1287	0.0879	0.1135	0.1236	0.1029	0.149	0.1145	0.1413			307.6	0.0557	0.0304	0.0194	0.0899
																														308	0.077	0.093	0.0407	0.1066	0.1288	0.0887	0.1137	0.1231	0.105	0.1482	0.1167	0.1415			308	0.0566	0.0299	0.02	0.0897
																														308.4	0.0778	0.0926	0.0399	0.1054	0.129	0.0876	0.1134	0.1242	0.1038	0.1486	0.1158	0.1406			308.4	0.0551	0.031	0.021	0.0888
																														308.8	0.0766	0.0923	0.041	0.1063	0.1294	0.088	0.1136	0.1227	0.1046	0.1486	0.1161	0.1411			308.8	0.0556	0.0309	0.0197	0.0894
																														309.2	0.0777	0.0921	0.0399	0.1055	0.1291	0.0877	0.1137	0.124	0.1043	0.1491	0.1152	0.1413			309.2	0.0555	0.0297	0.0199	0.0891
																														309.6	0.0775	0.0929	0.0402	0.1068	0.1291	0.0882	0.1138	0.1223	0.105	0.1494	0.1159	0.1425			309.6	0.0561	0.0306	0.0197	0.089
																														310	0.0768	0.0928	0.0407	0.1059	0.129	0.0882	0.1136	0.1228	0.1035	0.1487	0.1155	0.1414			310	0.0556	0.0295	0.0201	0.0898
																														310.4	0.0774	0.0924	0.041	0.1066	0.1292	0.0886	0.1139	0.1233	0.1043	0.1487	0.1163	0.1417			310.4	0.0564	0.0307	0.0206	0.0898
																														310.8	0.0774	0.0926	0.0402	0.1057	0.1291	0.0884	0.1134	0.1232	0.1038	0.1487	0.1161	0.1409			310.8	0.0563	0.03	0.0208	0.0898
																														311.2	0.0772	0.0933	0.0407	0.1057	0.1293	0.0883	0.1131	0.1231	0.1041	0.1491	0.116	0.1411			311.2	0.0546	0.0299	0.0201	0.0892
																														311.6	0.0775	0.0924	0.0391	0.1063	0.1289	0.0892	0.1131	0.1235	0.1033	0.1482	0.1159	0.1412			311.6	0.0558	0.0315	0.0202	0.089
																														312	0.0772	0.0928	0.0401	0.1053	0.1288	0.0888	0.1132	0.1231	0.1047	0.1491	0.1163	0.141			312	0.0558	0.0303	0.0207	0.0893
																														312.4	0.0775	0.0923	0.0402	0.1057	0.1288	0.0896	0.1128	0.1225	0.104	0.1483	0.1162	0.1421			312.4	0.056	0.03	0.0196	0.0894
																														312.8	0.0773	0.0932	0.041	0.1065	0.1286	0.0887	0.1138	0.124	0.1041	0.149	0.1155	0.1414			312.8	0.0564	0.0301	0.0212	0.0896
																														313.2	0.0774	0.0924	0.0407	0.1064	0.1294	0.0886	0.1127	0.1232	0.1041	0.1489	0.115	0.1413			313.2	0.0564	0.0304	0.0208	0.0887
																														313.6	0.0784	0.0929	0.0419	0.1063	0.1277	0.0885	0.1136	0.124	0.1036	0.1491	0.1155	0.1417			313.6	0.0548	0.0309	0.0207	0.0899
																														314	0.0787	0.0924	0.0406	0.1068	0.1295	0.0894	0.1133	0.1226	0.1038	0.1493	0.1159	0.1403			314	0.0553	0.0316	0.0206	0.09
																														314.4	0.0786	0.0931	0.0411	0.106	0.1288	0.0898	0.1133	0.1233	0.1049	0.1494	0.116	0.1417			314.4	0.0561	0.0312	0.0208	0.0897
																														314.8	0.0779	0.0937	0.0401	0.1066	0.1289	0.0898	0.113	0.1232	0.1034	0.1477	0.1157	0.1422			314.8	0.0565	0.0307	0.0213	0.0899
																														315.2	0.0779	0.0934	0.0417	0.1066	0.128	0.0886	0.1128	0.1237	0.1043	0.1493	0.1153	0.1424			315.2	0.0573	0.0306	0.0207	0.0894
																														315.6	0.0777	0.0934	0.041	0.1065	0.1282	0.0893	0.1139	0.1222	0.104	0.1486	0.1157	0.1419			315.6	0.0556	0.031	0.0201	0.0907
																														316	0.0777	0.0937	0.0413	0.1053	0.129	0.0888	0.1136	0.1237	0.104	0.1481	0.1151	0.1408			316	0.0557	0.0306	0.0202	0.0892
																														316.4	0.0787	0.0938	0.041	0.1058	0.1286	0.09	0.1141	0.1232	0.1036	0.1477	0.1169	0.1426			316.4	0.0564	0.0309	0.0207	0.0891
																														316.8	0.0788	0.0938	0.0405	0.1056	0.1289	0.0899	0.1136	0.1233	0.1035	0.1494	0.1168	0.1414			316.8	0.0564	0.0312	0.0209	0.09
																														317.2	0.0787	0.0939	0.0401	0.1062	0.1294	0.0894	0.1131	0.1226	0.1045	0.1488	0.1165	0.1413			317.2	0.0568	0.0316	0.0211	0.0902
																														317.6	0.0779	0.0937	0.0409	0.1051	0.1296	0.0891	0.1138	0.123	0.1051	0.1494	0.115	0.1412			317.6	0.0568	0.0318	0.0206	0.09
																														318	0.0778	0.0937	0.0406	0.1065	0.1292	0.0892	0.1138	0.1228	0.1036	0.1494	0.116	0.1411			318	0.0567	0.0303	0.0204	0.0906
																														318.4	0.0787	0.0945	0.0414	0.1057	0.1287	0.0898	0.1133	0.1227	0.1036	0.148	0.1154	0.1413			318.4	0.0562	0.0309	0.0206	0.0901
																														318.8	0.0794	0.0934	0.0407	0.1063	0.1297	0.0898	0.1132	0.1236	0.1038	0.1499	0.1158	0.1414			318.8	0.0566	0.0316	0.0216	0.0904
																														319.2	0.0782	0.094	0.041	0.1062	0.1287	0.0902	0.1133	0.1235	0.1043	0.149	0.1157	0.1406			319.2	0.0571	0.0306	0.0205	0.0903
																														319.6	0.0774	0.0932	0.0408	0.1066	0.13	0.0897	0.1142	0.1227	0.1042	0.1482	0.1156	0.142			319.6	0.056	0.0307	0.0203	0.0902
																														320	0.0783	0.0945	0.0413	0.1066	0.1283	0.0908	0.1132	0.1225	0.1048	0.1485	0.1157	0.1408			320	0.0573	0.0309	0.0213	0.0904
																														320.4	0.0795	0.0944	0.0415	0.1066	0.1296	0.0898	0.113	0.1235	0.1049	0.1489	0.1154	0.1415			320.4	0.057	0.0313	0.0207	0.09
																														320.8	0.0787	0.0946	0.0415	0.1066	0.1288	0.0909	0.1135	0.1235	0.1044	0.1476	0.1158	0.1405			320.8	0.0563	0.0312	0.0216	0.0907
																														321.2	0.0795	0.0944	0.0422	0.1058	0.1296	0.0897	0.1144	0.1239	0.104	0.1482	0.1162	0.1423			321.2	0.0571	0.0297	0.0208	0.0903
																														321.6	0.0784	0.094	0.0415	0.1063	0.1283	0.0905	0.1132	0.1231	0.1049	0.1481	0.116	0.142			321.6	0.0562	0.0311	0.0215	0.0904
																														322	0.0794	0.0937	0.0415	0.1067	0.1287	0.091	0.1128	0.1236	0.1038	0.1496	0.1165	0.1414			322	0.057	0.0314	0.0211	0.0902
																														322.4	0.0796	0.0943	0.0418	0.1058	0.1278	0.0913	0.1131	0.124	0.1038	0.1491	0.1165	0.1415			322.4	0.0572	0.0314	0.0213	0.0894
																														322.8	0.0783	0.0947	0.0414	0.1076	0.1289	0.0912	0.1132	0.1231	0.1042	0.1484	0.1159	0.141			322.8	0.0568	0.0315	0.0212	0.0907
																														323.2	0.0783	0.0953	0.0418	0.106	0.1294	0.0908	0.1141	0.123	0.1041	0.1484	0.1161	0.1418			323.2	0.0575	0.031	0.0207	0.0902
																														323.6	0.0801	0.0943	0.0412	0.1074	0.1287	0.0912	0.1141	0.1221	0.1042	0.1483	0.1165	0.142			323.6	0.0555	0.0316	0.0211	0.0906
																														324	0.0791	0.0952	0.0411	0.1061	0.1307	0.0904	0.1135	0.1232	0.1033	0.1488	0.1163	0.1412			324	0.0564	0.0312	0.0209	0.0899
																														324.4	0.08	0.0942	0.0417	0.1064	0.1285	0.0909	0.1133	0.1232	0.1044	0.1492	0.1159	0.1409			324.4	0.0573	0.0313	0.0203	0.0899
																														324.8	0.0793	0.0939	0.0411	0.1074	0.1292	0.0921	0.1137	0.1241	0.1041	0.1493	0.1164	0.141			324.8	0.0576	0.0308	0.0209	0.09
																														325.2	0.0791	0.0947	0.0423	0.1076	0.1296	0.0918	0.1138	0.1233	0.1054	0.1488	0.1163	0.1411			325.2	0.0569	0.0321	0.0214	0.0903
																														325.6	0.0803	0.096	0.0426	0.1062	0.1291	0.091	0.113	0.1229	0.1039	0.1487	0.1166	0.1414			325.6	0.0567	0.0315	0.0211	0.0905
																														326	0.0792	0.0956	0.0423	0.1066	0.1281	0.0906	0.1138	0.1226	0.1043	0.1479	0.1159	0.1421			326	0.0563	0.0313	0.0213	0.0907
																														326.4	0.0798	0.0954	0.0429	0.1071	0.1285	0.0914	0.1133	0.1226	0.1031	0.1484	0.1158	0.1414			326.4	0.0567	0.031	0.0208	0.0912
																														326.8	0.0803	0.0944	0.0422	0.1062	0.1283	0.0906	0.113	0.1235	0.1038	0.1487	0.1163	0.1409			326.8	0.057	0.0316	0.0215	0.0905
																														327.2	0.079	0.0943	0.0424	0.1079	0.13	0.0912	0.1135	0.1229	0.1036	0.1484	0.116	0.142			327.2	0.0582	0.0323	0.0215	0.0903
																														327.6	0.0795	0.0954	0.0428	0.1068	0.1294	0.092	0.1133	0.1236	0.1038	0.1485	0.1168	0.1416			327.6	0.0574	0.0316	0.021	0.0908
																														328	0.0799	0.0946	0.0427	0.107	0.1298	0.092	0.1148	0.1227	0.1042	0.1481	0.1157	0.1412			328	0.0562	0.032	0.0221	0.0908
																														328.4	0.0799	0.0957	0.0427	0.1064	0.1292	0.0919	0.113	0.1235	0.1042	0.1478	0.1157	0.1417			328.4	0.0573	0.0314	0.0209	0.0904
																														328.8	0.0806	0.0953	0.0424	0.1064	0.1292	0.0912	0.1136	0.123	0.1045	0.1478	0.1162	0.1414			328.8	0.058	0.0308	0.0219	0.0916
																														329.2	0.0799	0.0957	0.0426	0.107	0.1292	0.0919	0.1139	0.1229	0.1046	0.1482	0.116	0.141			329.2	0.0571	0.0322	0.0205	0.0906
																														329.6	0.0802	0.0949	0.0418	0.1072	0.1291	0.0928	0.1135	0.123	0.1041	0.1489	0.1156	0.1414			329.6	0.0575	0.0319	0.0216	0.0906
																														330	0.0802	0.0953	0.0434	0.1074	0.1299	0.0929	0.1133	0.1242	0.1046	0.149	0.1159	0.1409			330	0.0564	0.0319	0.0219	0.0906
																														330.4	0.08	0.095	0.0427	0.1069	0.1302	0.0928	0.1135	0.1236	0.1047	0.1487	0.1166	0.1415			330.4	0.0573	0.0321	0.0217	0.091
																														330.8	0.0802	0.096	0.0429	0.1062	0.1283	0.0922	0.1145	0.1233	0.1043	0.1486	0.1159	0.1408			330.8	0.0566	0.0317	0.0214	0.0915
																														331.2	0.0808	0.0961	0.0427	0.1066	0.1294	0.0918	0.1136	0.1229	0.1047	0.1489	0.1151	0.1425			331.2	0.0574	0.0315	0.0217	0.0911
																														331.6	0.0807	0.0944	0.0431	0.1069	0.1274	0.0923	0.1137	0.1226	0.1038	0.1485	0.1156	0.1417			331.6	0.0574	0.0312	0.0221	0.0915
																														332	0.0804	0.0954	0.042	0.1064	0.1288	0.0925	0.113	0.1224	0.1041	0.1486	0.1153	0.1415			332	0.0579	0.0318	0.0215	0.0915
																														332.4	0.08	0.0964	0.0434	0.1066	0.1283	0.0929	0.114	0.1226	0.1049	0.1484	0.116	0.1418			332.4	0.0571	0.0321	0.0212	0.0913
																														332.8	0.0807	0.0955	0.0424	0.1064	0.1303	0.0923	0.1148	0.1231	0.1048	0.148	0.1159	0.1412			332.8	0.0573	0.0319	0.0207	0.0911
																														333.2	0.0812	0.0959	0.0435	0.1066	0.1282	0.0928	0.113	0.1231	0.1035	0.1483	0.1169	0.1417			333.2	0.0579	0.031	0.0219	0.0911
																														333.6	0.0807	0.096	0.043	0.1076	0.1294	0.0927	0.1139	0.1233	0.1048	0.1473	0.116	0.142			333.6	0.0576	0.0318	0.021	0.0911
																														334	0.0811	0.0961	0.0432	0.1074	0.1285	0.0923	0.1133	0.1232	0.1044	0.1484	0.1162	0.1415			334	0.0575	0.0321	0.0214	0.0917
																														334.4	0.0802	0.0952	0.043	0.107	0.1287	0.0921	0.114	0.1224	0.1044	0.1485	0.1158	0.1416			334.4	0.0588	0.0323	0.0215	0.0912
																														334.8	0.0813	0.0954	0.0431	0.1063	0.1286	0.0936	0.114	0.1246	0.104	0.1486	0.1159	0.142			334.8	0.058	0.0315	0.0219	0.0906
																														335.2	0.0804	0.0954	0.0438	0.1071	0.1291	0.0928	0.1148	0.1233	0.1035	0.1486	0.1168	0.1414			335.2	0.0575	0.0323	0.0213	0.0915
																														335.6	0.081	0.0964	0.0432	0.1066	0.1291	0.0927	0.1137	0.1231	0.1043	0.1488	0.1169	0.1414			335.6	0.0574	0.0316	0.0213	0.0916
																														336	0.0806	0.0962	0.0437	0.107	0.1292	0.0938	0.1138	0.1231	0.1044	0.1473	0.1167	0.1413			336	0.0578	0.0328	0.0222	0.0915
																														336.4	0.0808	0.0957	0.0427	0.1067	0.1287	0.0933	0.1139	0.1234	0.1035	0.1493	0.1156	0.1424			336.4	0.0585	0.0316	0.0218	0.0924
																														336.8	0.0806	0.0966	0.0441	0.1072	0.1286	0.0928	0.1134	0.1233	0.104	0.1482	0.1165	0.1421			336.8	0.0581	0.0313	0.0221	0.0915
																														337.2	0.0809	0.0954	0.0437	0.1073	0.1301	0.0929	0.1139	0.1223	0.1039	0.1489	0.1156	0.142			337.2	0.0577	0.0318	0.0214	0.091
																														337.6	0.0814	0.0952	0.044	0.1071	0.129	0.0922	0.1136	0.1228	0.1034	0.1482	0.1167	0.1412			337.6	0.0581	0.0323	0.0217	0.0916
																														338	0.0811	0.0964	0.0439	0.1068	0.1289	0.0944	0.1136	0.1243	0.1043	0.148	0.1162	0.1419			338	0.0577	0.0325	0.0217	0.0917
																														338.4	0.0807	0.0962	0.0438	0.1063	0.1284	0.0942	0.1129	0.1235	0.1035	0.1485	0.1155	0.1414			338.4	0.0581	0.0324	0.0217	0.0926
																														338.8	0.0815	0.0968	0.0444	0.1076	0.1299	0.0932	0.1134	0.1237	0.1044	0.1475	0.1164	0.1417			338.8	0.0577	0.0325	0.0221	0.091
																														339.2	0.0813	0.097	0.0431	0.1062	0.1296	0.0934	0.1135	0.1229	0.1043	0.1486	0.1156	0.1419			339.2	0.0579	0.032	0.0222	0.0925
																														339.6	0.0812	0.0965	0.0441	0.1074	0.1299	0.0939	0.1134	0.1225	0.1042	0.1475	0.1159	0.1414			339.6	0.0581	0.0315	0.0224	0.0919
																														340	0.0817	0.0955	0.0434	0.107	0.1285	0.0939	0.1142	0.1225	0.1036	0.1485	0.1161	0.1413			340	0.058	0.033	0.0216	0.0915
																														340.4	0.0823	0.0961	0.0445	0.1075	0.1289	0.0946	0.1138	0.1239	0.1041	0.1472	0.1162	0.1421			340.4	0.0581	0.0324	0.0222	0.0913
																														340.8	0.0821	0.0974	0.0444	0.1072	0.1289	0.0929	0.1142	0.1233	0.1051	0.1484	0.117	0.1418			340.8	0.0582	0.0319	0.0224	0.0924
																														341.2	0.0817	0.0969	0.0434	0.1064	0.1283	0.0942	0.1135	0.1236	0.1039	0.1489	0.1156	0.1416			341.2	0.0581	0.0327	0.0217	0.0918
																														341.6	0.0816	0.0971	0.0443	0.1074	0.1296	0.0943	0.1138	0.1234	0.1043	0.1487	0.1171	0.142			341.6	0.0578	0.0324	0.0215	0.0918
																														342	0.0815	0.0969	0.0437	0.1064	0.1289	0.0939	0.1129	0.1236	0.1047	0.1494	0.1163	0.1421			342	0.0584	0.0332	0.0216	0.0919
																														342.4	0.0819	0.0966	0.0438	0.1071	0.1286	0.0939	0.114	0.1232	0.1047	0.1482	0.1158	0.1424			342.4	0.0583	0.0329	0.0218	0.0917
																														342.8	0.0819	0.097	0.0445	0.1071	0.1287	0.094	0.1144	0.1234	0.1048	0.1484	0.1163	0.1424			342.8	0.0581	0.033	0.0217	0.0932
																														343.2	0.0821	0.0969	0.0447	0.1072	0.1289	0.0946	0.1136	0.1231	0.1043	0.1475	0.1154	0.1415			343.2	0.0584	0.033	0.0222	0.0918
																														343.6	0.082	0.0972	0.0448	0.1066	0.1286	0.0949	0.1128	0.1232	0.1048	0.1482	0.1171	0.1419			343.6	0.059	0.0329	0.0219	0.092
																														344	0.0818	0.0975	0.0447	0.1075	0.1295	0.0936	0.1135	0.1237	0.1046	0.1479	0.1167	0.1419			344	0.0584	0.0323	0.0222	0.0926
																														344.4	0.0817	0.097	0.0446	0.1069	0.1291	0.0945	0.1133	0.1238	0.1037	0.1479	0.1157	0.1417			344.4	0.0577	0.0322	0.0215	0.0923
																														344.8	0.0816	0.0971	0.0443	0.1072	0.1285	0.094	0.1125	0.1232	0.1043	0.1484	0.1152	0.1411			344.8	0.0582	0.032	0.0221	0.0916
																														345.2	0.0821	0.0968	0.0445	0.1073	0.1289	0.0947	0.1137	0.123	0.1044	0.1485	0.1157	0.1416			345.2	0.0577	0.0328	0.0219	0.0919
																														345.6	0.0817	0.0959	0.0442	0.1068	0.1288	0.0942	0.1147	0.123	0.1036	0.1491	0.1157	0.1416			345.6	0.0585	0.0325	0.0221	0.0923
																														346	0.0822	0.0967	0.0447	0.1076	0.1295	0.0946	0.1138	0.1236	0.1043	0.1479	0.1166	0.1417			346	0.0588	0.033	0.0228	0.0924
																														346.4	0.0826	0.0972	0.0449	0.1068	0.1296	0.0949	0.1139	0.1232	0.105	0.148	0.1161	0.1413			346.4	0.0578	0.0326	0.0221	0.0933
																														346.8	0.0822	0.0976	0.0448	0.1069	0.1292	0.0948	0.1133	0.1228	0.1044	0.1482	0.1162	0.142			346.8	0.0587	0.0323	0.0226	0.092
																														347.2	0.0827	0.0971	0.0451	0.108	0.1285	0.0945	0.1148	0.1231	0.1041	0.1479	0.1157	0.1415			347.2	0.0582	0.0324	0.0223	0.093
																														347.6	0.0819	0.0966	0.0444	0.1077	0.1295	0.0953	0.114	0.1229	0.1042	0.1488	0.1161	0.1411			347.6	0.0589	0.0323	0.0222	0.0922
																														348	0.083	0.0962	0.0449	0.1073	0.1286	0.0953	0.1136	0.1226	0.1043	0.1479	0.1161	0.1425			348	0.0583	0.0328	0.0227	0.0919
																														348.4	0.0834	0.097	0.0443	0.107	0.1303	0.0959	0.1135	0.1236	0.1044	0.1485	0.1159	0.1406			348.4	0.059	0.0331	0.0227	0.0928
																														348.8	0.0826	0.0971	0.046	0.1077	0.1293	0.0954	0.1129	0.1235	0.1043	0.1461	0.1163	0.1413			348.8	0.0585	0.0329	0.0225	0.0924
																														349.2	0.0834	0.0975	0.0453	0.1084	0.1296	0.0947	0.1124	0.1232	0.1046	0.1487	0.1158	0.1407			349.2	0.0588	0.0342	0.0218	0.092
																														349.6	0.0827	0.0972	0.0443	0.1084	0.1287	0.0952	0.1128	0.1235	0.1039	0.1482	0.1162	0.1413			349.6	0.0581	0.033	0.0221	0.0926
																														350	0.0833	0.0972	0.0447	0.1087	0.1292	0.0956	0.1142	0.1231	0.104	0.1479	0.1159	0.1422			350	0.0581	0.0333	0.0221	0.0935
																														350.4	0.0828	0.0975	0.045	0.1073	0.1296	0.0952	0.1143	0.123	0.1039	0.1483	0.1158	0.1414			350.4	0.0593	0.0332	0.0232	0.0925
																														350.8	0.0826	0.0972	0.0457	0.1077	0.1294	0.0955	0.1135	0.1225	0.1044	0.147	0.1157	0.1409			350.8	0.0585	0.0329	0.0225	0.0924
																														351.2	0.083	0.0974	0.0452	0.1068	0.1288	0.096	0.113	0.1233	0.1038	0.1488	0.1163	0.1419			351.2	0.0594	0.0334	0.0222	0.093
																														351.6	0.0832	0.0978	0.0456	0.1064	0.1292	0.0954	0.1137	0.1232	0.1039	0.1478	0.1163	0.1412			351.6	0.0586	0.033	0.0227	0.0933
																														352	0.0826	0.098	0.0451	0.1073	0.1288	0.0959	0.114	0.1237	0.1046	0.1485	0.1159	0.1416			352	0.0585	0.0326	0.0222	0.0926
																														352.4	0.0836	0.0985	0.0455	0.1078	0.1292	0.0959	0.1135	0.1236	0.1041	0.1482	0.1162	0.1417			352.4	0.0594	0.0331	0.0225	0.0928
																														352.8	0.0837	0.0979	0.0453	0.1074	0.1296	0.0958	0.1142	0.1222	0.1047	0.148	0.1156	0.1418			352.8	0.0593	0.0332	0.0219	0.093
																														353.2	0.0833	0.0977	0.0451	0.1077	0.1286	0.0967	0.113	0.1225	0.1041	0.1471	0.1162	0.1414			353.2	0.0594	0.034	0.0225	0.0931
																														353.6	0.0838	0.0974	0.046	0.1072	0.129	0.0959	0.114	0.1232	0.1042	0.1481	0.116	0.1421			353.6	0.0591	0.0335	0.0225	0.0931
																														354	0.0832	0.0966	0.0449	0.1072	0.1283	0.0965	0.113	0.1232	0.104	0.1482	0.1165	0.1412			354	0.0594	0.034	0.0226	0.0934
																														354.4	0.0837	0.0982	0.0456	0.1079	0.1283	0.096	0.1127	0.1236	0.1044	0.1474	0.1162	0.1422			354.4	0.0593	0.0319	0.0231	0.0924
																														354.8	0.0833	0.0982	0.0453	0.1074	0.1292	0.0962	0.114	0.1235	0.1043	0.1475	0.1164	0.1417			354.8	0.0592	0.0328	0.0223	0.0929
																														355.2	0.0842	0.0981	0.0462	0.108	0.1296	0.0967	0.1129	0.1236	0.105	0.1483	0.1167	0.1411			355.2	0.0595	0.0336	0.0225	0.093
																														355.6	0.0834	0.0972	0.0454	0.1076	0.1295	0.0969	0.1131	0.1227	0.1038	0.1477	0.1159	0.1414			355.6	0.0597	0.0333	0.0224	0.0928
																														356	0.0824	0.0984	0.0462	0.107	0.1296	0.0974	0.1131	0.1238	0.1039	0.1481	0.1161	0.1421			356	0.0598	0.0341	0.0223	0.0929
																														356.4	0.0833	0.0976	0.0464	0.1067	0.129	0.0969	0.1135	0.1237	0.1044	0.1481	0.1162	0.1428			356.4	0.0587	0.0338	0.0227	0.0932
																														356.8	0.0832	0.0982	0.0457	0.1074	0.1295	0.0959	0.113	0.1242	0.1045	0.148	0.1165	0.1418			356.8	0.0591	0.0332	0.0221	0.0931
																														357.2	0.0835	0.0986	0.0458	0.1077	0.1287	0.0954	0.1136	0.1225	0.1044	0.1495	0.1145	0.142			357.2	0.0597	0.0336	0.0226	0.0933
																														357.6	0.0839	0.0974	0.0455	0.1076	0.1297	0.0969	0.1137	0.1235	0.1042	0.1487	0.1159	0.1419			357.6	0.0592	0.0336	0.0226	0.0933
																														358	0.0835	0.097	0.0458	0.1078	0.1286	0.097	0.1132	0.1235	0.1034	0.1484	0.1159	0.1421			358	0.06	0.0341	0.0225	0.0923
																														358.4	0.084	0.0977	0.0461	0.1071	0.1294	0.0966	0.1133	0.123	0.1051	0.1484	0.1156	0.1422			358.4	0.0602	0.0326	0.0233	0.093
																														358.8	0.0832	0.0981	0.0462	0.1074	0.13	0.096	0.1133	0.123	0.1042	0.148	0.1163	0.1414			358.8	0.0592	0.0342	0.023	0.0927
																														359.2	0.0839	0.0988	0.0467	0.1078	0.1306	0.0966	0.1135	0.1231	0.1036	0.149	0.1163	0.1426			359.2	0.059	0.0345	0.0229	0.0935
																														359.6	0.0847	0.0987	0.0466	0.1083	0.1284	0.0964	0.1137	0.1241	0.1043	0.1483	0.116	0.1419			359.6	0.0602	0.0335	0.0227	0.0929
																														360	0.0843	0.0991	0.0465	0.108	0.128	0.0967	0.1138	0.1243	0.1038	0.1478	0.117	0.1412			360	0.0594	0.0337	0.0224	0.0941
																														360.4	0.0844	0.0979	0.0452	0.1079	0.1295	0.0966	0.1139	0.1234	0.1039	0.1481	0.1158	0.1414			360.4	0.0612	0.0335	0.0225	0.0939
																														360.8	0.0836	0.0984	0.0467	0.1076	0.1293	0.0981	0.1133	0.1222	0.1045	0.1478	0.1164	0.1417			360.8	0.0603	0.035	0.0228	0.0934
																														361.2	0.0846	0.0979	0.0466	0.1071	0.1283	0.0965	0.113	0.1234	0.1048	0.1473	0.116	0.1421			361.2	0.06	0.0334	0.022	0.0938
																														361.6	0.085	0.0983	0.0463	0.1073	0.1298	0.0978	0.1134	0.1229	0.1042	0.1487	0.1159	0.1413			361.6	0.0594	0.0343	0.0234	0.0942
																														362	0.0846	0.099	0.0459	0.1077	0.1295	0.0974	0.1139	0.1223	0.1044	0.1483	0.1162	0.1419			362	0.0592	0.0335	0.0223	0.0929
																														362.4	0.0846	0.099	0.0466	0.1085	0.1291	0.0971	0.1148	0.1238	0.1042	0.1489	0.1165	0.1414			362.4	0.0602	0.0333	0.0232	0.0936
																														362.8	0.0831	0.0976	0.0463	0.1079	0.1289	0.097	0.1127	0.1237	0.1047	0.1472	0.116	0.1417			362.8	0.06	0.0331	0.0229	0.0935
																														363.2	0.0841	0.0982	0.0464	0.1078	0.1301	0.0981	0.1134	0.1238	0.1048	0.1483	0.1155	0.1414			363.2	0.0606	0.0332	0.0232	0.0941
																														363.6	0.0844	0.0986	0.0468	0.1073	0.1286	0.0982	0.114	0.1235	0.1048	0.1482	0.1157	0.1422			363.6	0.0599	0.0348	0.0228	0.0936
																														364	0.0841	0.0989	0.0474	0.1078	0.1301	0.0978	0.1134	0.1225	0.1039	0.1474	0.1165	0.1418			364	0.06	0.0334	0.0226	0.0938
																														364.4	0.0853	0.0988	0.047	0.1075	0.1285	0.0974	0.1133	0.124	0.1042	0.1481	0.1154	0.1423			364.4	0.0603	0.0341	0.0228	0.0935
																														364.8	0.0847	0.0988	0.047	0.108	0.129	0.0981	0.1137	0.1239	0.1044	0.1481	0.1159	0.1418			364.8	0.0595	0.0348	0.023	0.0926
																														365.2	0.0842	0.0991	0.0461	0.1083	0.1289	0.0975	0.1136	0.1236	0.1048	0.1483	0.1164	0.1416			365.2	0.0599	0.0339	0.0233	0.0935
																														365.6	0.0848	0.0991	0.0472	0.1072	0.1293	0.0978	0.1129	0.1237	0.1035	0.1483	0.1161	0.1418			365.6	0.0597	0.0338	0.0226	0.0933
																														366	0.0842	0.098	0.0462	0.1085	0.1289	0.0979	0.1135	0.1232	0.1042	0.1482	0.1164	0.1422			366	0.0593	0.0345	0.0235	0.094
																														366.4	0.0851	0.0991	0.0477	0.1076	0.1295	0.0985	0.1136	0.1227	0.1044	0.1473	0.1162	0.1407			366.4	0.0599	0.0344	0.0236	0.0936
																														366.8	0.085	0.0994	0.0467	0.1082	0.1288	0.0979	0.1141	0.1235	0.1038	0.1471	0.1157	0.1421			366.8	0.0594	0.0345	0.0231	0.0939
																														367.2	0.0847	0.099	0.0471	0.1076	0.1299	0.0981	0.1143	0.1231	0.1036	0.1472	0.1158	0.1421			367.2	0.0604	0.0344	0.0226	0.0929
																														367.6	0.0852	0.0989	0.0477	0.1083	0.1289	0.0985	0.1139	0.124	0.1035	0.1474	0.1165	0.1423			367.6	0.06	0.0348	0.0227	0.0936
																														368	0.0843	0.0988	0.0469	0.1071	0.1291	0.0984	0.1138	0.124	0.1045	0.1481	0.1165	0.1425			368	0.06	0.0346	0.0232	0.0938
																														368.4	0.0855	0.0988	0.0475	0.1079	0.1292	0.0989	0.1136	0.1234	0.1042	0.1474	0.1159	0.1418			368.4	0.0604	0.0335	0.0237	0.0948
																														368.8	0.0845	0.0987	0.0477	0.1079	0.129	0.0984	0.1132	0.1237	0.1048	0.1483	0.116	0.1419			368.8	0.0597	0.0349	0.0237	0.0941
																														369.2	0.0864	0.0993	0.0479	0.1085	0.1289	0.0989	0.114	0.1226	0.1037	0.1478	0.1162	0.1416			369.2	0.0598	0.0338	0.0229	0.0929
																														369.6	0.0851	0.0998	0.0472	0.1085	0.1294	0.0978	0.1135	0.1232	0.1042	0.1485	0.116	0.1417			369.6	0.0604	0.0347	0.0233	0.0942
																														370	0.0852	0.099	0.0474	0.1076	0.1289	0.0991	0.1136	0.1232	0.104	0.1479	0.1157	0.1404			370	0.0601	0.0347	0.0228	0.0929
																														370.4	0.0852	0.0997	0.0471	0.1089	0.1295	0.0984	0.1128	0.1226	0.1048	0.148	0.1162	0.1429			370.4	0.0603	0.0333	0.0222	0.0941
																														370.8	0.0858	0.0996	0.0477	0.1077	0.1295	0.0992	0.1141	0.1236	0.1043	0.1474	0.1164	0.1418			370.8	0.0605	0.0343	0.0231	0.0937
																														371.2	0.0852	0.0998	0.0476	0.1087	0.1289	0.0987	0.1134	0.1237	0.1053	0.1472	0.1162	0.1414			371.2	0.0607	0.0331	0.0231	0.0944
																														371.6	0.086	0.1001	0.0479	0.1073	0.1291	0.0986	0.1142	0.1227	0.1042	0.1478	0.1149	0.141			371.6	0.0601	0.0343	0.023	0.0944
																														372	0.0859	0.0988	0.0478	0.1082	0.1299	0.0987	0.1142	0.1231	0.1044	0.1482	0.1159	0.1421			372	0.0601	0.0351	0.024	0.0944
																														372.4	0.0858	0.099	0.0477	0.1084	0.1291	0.0993	0.1128	0.123	0.1048	0.1486	0.1156	0.1415			372.4	0.0616	0.0353	0.0228	0.0939
																														372.8	0.0853	0.0995	0.048	0.1084	0.1284	0.0982	0.1132	0.1229	0.1038	0.148	0.1159	0.1412			372.8	0.0605	0.0353	0.0234	0.0941
																														373.2	0.0857	0.0997	0.0473	0.1072	0.1305	0.0999	0.1137	0.1245	0.1041	0.148	0.1164	0.1414			373.2	0.0602	0.034	0.0236	0.0938
																														373.6	0.086	0.0989	0.0474	0.1078	0.1284	0.0992	0.1132	0.1234	0.104	0.1482	0.1164	0.1417			373.6	0.0611	0.0339	0.0243	0.0945
																														374	0.0848	0.0995	0.0476	0.1084	0.1296	0.0998	0.1133	0.1242	0.1039	0.1486	0.116	0.1423			374	0.0604	0.0345	0.0236	0.0944
																														374.4	0.0861	0.0988	0.0481	0.108	0.1293	0.0989	0.1147	0.1234	0.1043	0.1482	0.1155	0.1413			374.4	0.0604	0.0347	0.0232	0.0936
																														374.8	0.0855	0.0994	0.0481	0.1079	0.1297	0.0985	0.1139	0.123	0.1054	0.1481	0.1162	0.1419			374.8	0.0604	0.035	0.0233	0.0932
																														375.2	0.0858	0.0988	0.048	0.1086	0.1299	0.099	0.113	0.1234	0.1044	0.1475	0.1164	0.1414			375.2	0.0605	0.0354	0.0232	0.0938
																														375.6	0.0861	0.1008	0.0488	0.1077	0.1306	0.0994	0.1138	0.1228	0.104	0.1476	0.1162	0.1424			375.6	0.0605	0.0347	0.0234	0.0952
																														376	0.0857	0.0991	0.0478	0.108	0.1288	0.0995	0.1137	0.1234	0.1044	0.1482	0.1163	0.1413			376	0.0602	0.0355	0.0235	0.0946
																														376.4	0.0868	0.0998	0.0486	0.108	0.1289	0.0984	0.1142	0.123	0.1055	0.1483	0.1166	0.1416			376.4	0.0601	0.0347	0.0239	0.0945
																														376.8	0.0852	0.1002	0.0482	0.1085	0.1294	0.0989	0.1139	0.1246	0.1046	0.1477	0.1159	0.1415			376.8	0.0607	0.0347	0.0232	0.0937
																														377.2	0.0854	0.1008	0.0479	0.1082	0.1294	0.0993	0.1134	0.1235	0.1038	0.1476	0.1159	0.1411			377.2	0.0609	0.0351	0.0229	0.094
																														377.6	0.0863	0.1003	0.0481	0.1082	0.1291	0.0997	0.1135	0.1236	0.1048	0.1482	0.1154	0.1417			377.6	0.0612	0.0345	0.0232	0.0942
																														378	0.0855	0.1003	0.0483	0.1087	0.1296	0.0994	0.1128	0.1234	0.1041	0.1489	0.1156	0.1406			378	0.0606	0.0351	0.0237	0.0937
																														378.4	0.087	0.0998	0.048	0.1082	0.1294	0.1007	0.1138	0.1235	0.1051	0.1477	0.1162	0.1424			378.4	0.0613	0.0342	0.0236	0.0941
																														378.8	0.0863	0.1003	0.048	0.1087	0.1298	0.1006	0.1135	0.1234	0.1044	0.1473	0.1157	0.1416			378.8	0.0606	0.035	0.0233	0.0941
																														379.2	0.0856	0.1006	0.0486	0.109	0.1297	0.1004	0.1132	0.1233	0.1049	0.1476	0.1159	0.1411			379.2	0.0609	0.035	0.0237	0.0946
																														379.6	0.0865	0.1006	0.0482	0.1086	0.1299	0.099	0.1141	0.1236	0.1033	0.1475	0.1164	0.1415			379.6	0.0601	0.0359	0.024	0.0945
																														380	0.0862	0.1012	0.0486	0.1086	0.129	0.0998	0.1131	0.1237	0.1046	0.1475	0.1156	0.142			380	0.0607	0.0358	0.024	0.0947
																														380.4	0.0867	0.1002	0.0493	0.1081	0.1281	0.1001	0.1134	0.1246	0.1043	0.1472	0.116	0.1422			380.4	0.0606	0.0349	0.0237	0.0938
																														380.8	0.0864	0.1	0.0485	0.1078	0.1293	0.0997	0.1135	0.1237	0.1042	0.1471	0.1158	0.1421			380.8	0.06	0.0352	0.0236	0.0953
																														381.2	0.0862	0.1002	0.0488	0.1079	0.1302	0.0995	0.1145	0.1235	0.1047	0.1487	0.1169	0.1427			381.2	0.0608	0.0349	0.0243	0.0943
																														381.6	0.0867	0.0998	0.0487	0.1081	0.129	0.1	0.1146	0.124	0.1047	0.1479	0.1165	0.142			381.6	0.0607	0.035	0.0238	0.0943
																														382	0.086	0.1	0.0485	0.1082	0.1289	0.1001	0.1133	0.1235	0.1048	0.1485	0.1166	0.1416			382	0.0602	0.0343	0.0238	0.0954
																														382.4	0.0872	0.0998	0.0482	0.1079	0.1296	0.1	0.1135	0.124	0.1044	0.1484	0.1161	0.1419			382.4	0.0612	0.0352	0.0237	0.0949
																														382.8	0.0869	0.101	0.0486	0.1083	0.1294	0.1011	0.1131	0.1232	0.1041	0.1486	0.1153	0.1412			382.8	0.061	0.0347	0.0236	0.0949
																														383.2	0.0864	0.1001	0.0488	0.1076	0.1291	0.1008	0.1134	0.1231	0.1042	0.1476	0.1157	0.1422			383.2	0.0608	0.0351	0.0233	0.0952
																														383.6	0.0866	0.1004	0.0481	0.1084	0.1296	0.1003	0.1136	0.1241	0.1053	0.148	0.1165	0.1414			383.6	0.0609	0.0349	0.0239	0.0947
																														384	0.0871	0.1005	0.0491	0.108	0.1288	0.1007	0.1139	0.1232	0.1048	0.149	0.116	0.1421			384	0.0604	0.0347	0.0245	0.0947
																														384.4	0.0869	0.1008	0.0495	0.1088	0.1292	0.1	0.1137	0.1235	0.1056	0.1485	0.1164	0.1423			384.4	0.0614	0.0356	0.0243	0.0951
																														384.8	0.0871	0.0999	0.0488	0.1078	0.1306	0.0999	0.1132	0.123	0.1042	0.1485	0.1169	0.1424			384.8	0.0599	0.0344	0.0231	0.0935
																														385.2	0.0866	0.0994	0.0483	0.1085	0.1283	0.1001	0.114	0.124	0.1041	0.1477	0.1161	0.1415			385.2	0.0607	0.0357	0.0241	0.0956
																														385.6	0.0868	0.1008	0.0491	0.108	0.1287	0.1011	0.1138	0.1238	0.1043	0.1474	0.1165	0.142			385.6	0.0612	0.0347	0.0238	0.0956
																														386	0.0879	0.0995	0.0488	0.1088	0.1294	0.1004	0.1137	0.1242	0.104	0.1471	0.1159	0.1418			386	0.0607	0.0349	0.0236	0.0952
																														386.4	0.0875	0.1002	0.0503	0.1084	0.1304	0.1004	0.1133	0.1238	0.1045	0.1482	0.1163	0.1411			386.4	0.0615	0.035	0.0234	0.0948
																														386.8	0.0873	0.0997	0.0495	0.1079	0.1294	0.1007	0.1148	0.1228	0.1045	0.147	0.1164	0.1425			386.8	0.0619	0.0349	0.0239	0.0948
																														387.2	0.0863	0.1016	0.0493	0.1085	0.1295	0.1004	0.114	0.1239	0.1046	0.1484	0.1162	0.1418			387.2	0.0609	0.0358	0.0232	0.0948
																														387.6	0.0875	0.1005	0.0492	0.1084	0.1305	0.1003	0.1132	0.1238	0.1042	0.1476	0.1156	0.1425			387.6	0.0607	0.0352	0.0235	0.0953
																														388	0.0876	0.101	0.049	0.1086	0.1299	0.1003	0.1145	0.1233	0.1044	0.1477	0.1164	0.142			388	0.0617	0.0362	0.0234	0.0948
																														388.4	0.0872	0.1014	0.0493	0.1082	0.1284	0.1011	0.1135	0.123	0.1043	0.1483	0.1155	0.142			388.4	0.0616	0.037	0.0238	0.0951
																														388.8	0.0874	0.1009	0.0493	0.1082	0.1292	0.1022	0.1144	0.1236	0.1045	0.1476	0.1156	0.1418			388.8	0.0616	0.0358	0.0241	0.0953
																														389.2	0.0869	0.1001	0.0496	0.1089	0.1297	0.1016	0.1132	0.1233	0.104	0.1482	0.1161	0.1409			389.2	0.062	0.0354	0.0244	0.0949
																														389.6	0.0875	0.1016	0.0507	0.1091	0.1287	0.1011	0.1139	0.1235	0.1035	0.1469	0.1161	0.1424			389.6	0.0613	0.0356	0.0244	0.0939
																														390	0.088	0.1005	0.0497	0.1077	0.1293	0.1006	0.1138	0.1231	0.1039	0.1482	0.1153	0.1418			390	0.0619	0.0351	0.024	0.0955
																														390.4	0.0867	0.1013	0.0504	0.108	0.1289	0.1009	0.1133	0.1229	0.1039	0.1474	0.1163	0.1414			390.4	0.061	0.0368	0.0234	0.0962
																														390.8	0.0881	0.1008	0.0495	0.1082	0.129	0.1015	0.1143	0.1238	0.1037	0.1481	0.1161	0.1418			390.8	0.0615	0.0356	0.0241	0.096
																														391.2	0.0882	0.1019	0.05	0.1091	0.1301	0.1011	0.1138	0.1236	0.1038	0.1467	0.1156	0.1413			391.2	0.0608	0.0357	0.0237	0.0959
																														391.6	0.0883	0.1011	0.0498	0.1077	0.1283	0.1012	0.1137	0.1243	0.1056	0.1486	0.1164	0.1416			391.6	0.0619	0.0357	0.0246	0.0959
																														392	0.0879	0.1005	0.0494	0.109	0.1301	0.1016	0.1135	0.124	0.1042	0.1477	0.1164	0.1419			392	0.061	0.0346	0.0238	0.0952
																														392.4	0.0879	0.1013	0.0507	0.1086	0.1289	0.1009	0.113	0.1231	0.1041	0.1487	0.1168	0.1418			392.4	0.0619	0.0353	0.0242	0.0949
																														392.8	0.0882	0.1017	0.0497	0.1081	0.1293	0.1022	0.1142	0.1226	0.1047	0.1484	0.1159	0.1418			392.8	0.0614	0.0356	0.0236	0.0959
																														393.2	0.088	0.1018	0.0497	0.1079	0.128	0.1012	0.1137	0.1234	0.1041	0.1472	0.1158	0.142			393.2	0.0615	0.0361	0.0237	0.0956
																														393.6	0.0877	0.101	0.0501	0.1089	0.1295	0.1013	0.1144	0.1236	0.1046	0.148	0.1154	0.1423			393.6	0.0606	0.0364	0.024	0.0957
																														394	0.0883	0.1012	0.0502	0.1088	0.1296	0.1013	0.1134	0.1238	0.103	0.147	0.1161	0.1424			394	0.062	0.0353	0.0246	0.0947
																														394.4	0.0881	0.1006	0.0501	0.1087	0.1297	0.1007	0.1136	0.1232	0.1039	0.1485	0.1157	0.1421			394.4	0.0613	0.0354	0.0248	0.0956
																														394.8	0.0885	0.1019	0.051	0.1088	0.1289	0.1011	0.1134	0.1237	0.1039	0.1483	0.1164	0.1415			394.8	0.0613	0.0349	0.024	0.0953
																														395.2	0.089	0.101	0.0515	0.1087	0.1289	0.1018	0.1142	0.1227	0.105	0.1497	0.1159	0.1423			395.2	0.0615	0.0351	0.0237	0.0958
																														395.6	0.088	0.1018	0.0505	0.1085	0.1283	0.102	0.1138	0.1238	0.1038	0.1473	0.116	0.141			395.6	0.0607	0.036	0.0244	0.0958
																														396	0.0885	0.1022	0.0504	0.1081	0.1295	0.1014	0.1137	0.1226	0.1045	0.1471	0.1162	0.1427			396	0.0611	0.0354	0.0237	0.0961
																														396.4	0.0873	0.1017	0.05	0.1084	0.1298	0.1016	0.114	0.1241	0.1052	0.1478	0.1154	0.1419			396.4	0.0623	0.0366	0.0244	0.0946
																														396.8	0.0885	0.1013	0.0504	0.109	0.1296	0.1026	0.1133	0.1232	0.1048	0.1489	0.116	0.1424			396.8	0.0621	0.0353	0.0241	0.0954
																														397.2	0.088	0.1016	0.0505	0.1085	0.1301	0.102	0.1138	0.1232	0.1047	0.1482	0.115	0.1418			397.2	0.0619	0.035	0.025	0.095
																														397.6	0.0883	0.1012	0.0505	0.1085	0.1299	0.1025	0.1139	0.1225	0.1044	0.1473	0.116	0.1405			397.6	0.0616	0.0361	0.0242	0.0959
																														398	0.0888	0.1014	0.0504	0.1082	0.1281	0.101	0.1145	0.1231	0.1041	0.148	0.1174	0.1416			398	0.0615	0.0365	0.0242	0.0953
																														398.4	0.0883	0.1012	0.0504	0.1085	0.1303	0.1026	0.1137	0.1231	0.1046	0.1478	0.1167	0.1417			398.4	0.062	0.037	0.0248	0.0957
																														398.8	0.0878	0.1025	0.0505	0.1086	0.1294	0.1021	0.1132	0.1237	0.104	0.1481	0.1156	0.1421			398.8	0.0624	0.0359	0.0244	0.0957
																														399.2	0.0894	0.101	0.0509	0.1093	0.1293	0.1015	0.1136	0.1243	0.1056	0.1477	0.1159	0.1412			399.2	0.061	0.0358	0.0242	0.0948
																														399.6	0.0893	0.1016	0.0504	0.1081	0.1293	0.1023	0.1134	0.123	0.1044	0.1484	0.1157	0.1418			399.6	0.0608	0.0365	0.0243	0.096
																														400	0.0876	0.1021	0.0507	0.1089	0.13	0.1023	0.1139	0.1239	0.1053	0.1473	0.1169	0.1422			400	0.0625	0.0352	0.0246	0.0955
																														400.4	0.0894	0.1019	0.051	0.1085	0.1298	0.1025	0.1138	0.1235	0.1046	0.1469	0.1159	0.141			400.4	0.0614	0.0357	0.0244	0.0964
																														400.8	0.0889	0.102	0.0504	0.1085	0.1284	0.1023	0.1135	0.1233	0.104	0.1482	0.1165	0.1422			400.8	0.0622	0.037	0.0246	0.0959
																														401.2	0.0886	0.1017	0.0499	0.1094	0.1278	0.102	0.1139	0.1235	0.1044	0.1477	0.1165	0.1423			401.2	0.0611	0.0367	0.0248	0.0959
																														401.6	0.0888	0.1023	0.0511	0.1091	0.1286	0.103	0.1142	0.1241	0.1046	0.1484	0.1157	0.1419			401.6	0.0617	0.0364	0.0252	0.0953
																														402	0.0882	0.1018	0.0507	0.1089	0.129	0.103	0.1134	0.1245	0.1045	0.1474	0.1162	0.1421			402	0.0623	0.0367	0.024	0.0953
																														402.4	0.0893	0.1021	0.0513	0.108	0.1288	0.1035	0.114	0.1242	0.1047	0.1475	0.1165	0.1423			402.4	0.0625	0.0356	0.0234	0.0956
																														402.8	0.0893	0.1014	0.0511	0.1076	0.1294	0.102	0.1145	0.1235	0.1045	0.1473	0.1168	0.1414			402.8	0.0622	0.036	0.0241	0.0964
																														403.2	0.0893	0.1023	0.0512	0.1082	0.1301	0.1036	0.1138	0.124	0.1042	0.1471	0.1165	0.142			403.2	0.0619	0.0371	0.025	0.0963
																														403.6	0.0883	0.102	0.0503	0.1091	0.1286	0.1035	0.114	0.1225	0.1035	0.1478	0.1157	0.142			403.6	0.062	0.0366	0.0243	0.096
																														404	0.0881	0.1017	0.0511	0.1091	0.13	0.1023	0.1128	0.1242	0.105	0.1468	0.1166	0.1422			404	0.0613	0.0367	0.025	0.0961
																														404.4	0.0893	0.1018	0.0512	0.1087	0.1288	0.1028	0.1135	0.1238	0.1042	0.1486	0.1156	0.1418			404.4	0.0621	0.0368	0.0246	0.0955
																														404.8	0.089	0.1026	0.0514	0.1082	0.1295	0.1024	0.1126	0.1235	0.1047	0.1466	0.1154	0.1412			404.8	0.0619	0.0367	0.024	0.0959
																														405.2	0.0893	0.1019	0.0521	0.1093	0.1298	0.103	0.1129	0.1236	0.1041	0.1473	0.1161	0.1415			405.2	0.0616	0.0358	0.025	0.096
																														405.6	0.0895	0.1019	0.0508	0.1075	0.1299	0.1028	0.1141	0.1228	0.1046	0.1473	0.1161	0.1419			405.6	0.0618	0.0366	0.0243	0.0962
																														406	0.0887	0.1025	0.0513	0.1093	0.1288	0.1032	0.1138	0.1234	0.104	0.1472	0.116	0.142			406	0.0624	0.0366	0.0249	0.0958
																														406.4	0.0899	0.1023	0.051	0.1092	0.1297	0.1026	0.1136	0.1232	0.1046	0.1477	0.1165	0.1411			406.4	0.0615	0.0368	0.0245	0.0961
																														406.8	0.0893	0.1016	0.0518	0.1088	0.129	0.1032	0.114	0.1238	0.1035	0.1482	0.1151	0.1425			406.8	0.0618	0.0369	0.0246	0.0951
																														407.2	0.0899	0.1011	0.0514	0.1082	0.1301	0.1036	0.1144	0.1234	0.104	0.1484	0.1161	0.1422			407.2	0.062	0.0357	0.0243	0.0959
																														407.6	0.0899	0.1016	0.0523	0.1083	0.1298	0.1036	0.1137	0.1236	0.1046	0.1467	0.1153	0.1429			407.6	0.0623	0.0366	0.0245	0.0964
																														408	0.0896	0.1026	0.0524	0.1083	0.1293	0.1032	0.1133	0.1217	0.1044	0.1479	0.1155	0.1419			408	0.0624	0.0371	0.0248	0.0956
																														408.4	0.0898	0.1024	0.0518	0.1092	0.1298	0.1041	0.1134	0.1234	0.1041	0.149	0.1163	0.1417			408.4	0.0626	0.0358	0.0248	0.0967
																														408.8	0.0894	0.1011	0.0515	0.1092	0.1284	0.1036	0.1137	0.1228	0.1053	0.1467	0.1159	0.1414			408.8	0.0619	0.0367	0.0247	0.0947
																														409.2	0.0896	0.1026	0.0512	0.1091	0.1299	0.104	0.1127	0.1235	0.105	0.1474	0.1156	0.1422			409.2	0.0618	0.037	0.0243	0.0964
																														409.6	0.0905	0.1013	0.0521	0.1082	0.1283	0.1037	0.1141	0.1233	0.1039	0.148	0.1162	0.1421			409.6	0.0617	0.0369	0.0246	0.0964
																														410	0.09	0.1019	0.0524	0.1095	0.1308	0.1037	0.1144	0.1243	0.105	0.148	0.1147	0.1422			410	0.0623	0.0366	0.0247	0.0965
																														410.4	0.0896	0.1018	0.0517	0.1083	0.1283	0.1034	0.1141	0.1237	0.105	0.147	0.117	0.1421			410.4	0.0628	0.0357	0.0244	0.0959
																														410.8	0.0901	0.1023	0.0517	0.1085	0.1287	0.1035	0.1138	0.1239	0.1031	0.1483	0.1161	0.1416			410.8	0.0622	0.0363	0.0246	0.096
																														411.2	0.0897	0.1028	0.0519	0.1091	0.1286	0.1039	0.1136	0.1227	0.1047	0.1481	0.1155	0.1416			411.2	0.0626	0.0368	0.0251	0.0953
																														411.6	0.0912	0.1018	0.0523	0.1091	0.1295	0.1035	0.1135	0.1225	0.1057	0.1483	0.1158	0.1414			411.6	0.0621	0.0374	0.0253	0.0967
																														412	0.0902	0.1021	0.0527	0.1088	0.1288	0.1041	0.1134	0.1238	0.1041	0.1471	0.115	0.1412			412	0.0617	0.0368	0.0252	0.0961
																														412.4	0.09	0.1026	0.0524	0.1087	0.13	0.1041	0.1136	0.1234	0.1053	0.1479	0.1165	0.142			412.4	0.0627	0.0361	0.024	0.0962
																														412.8	0.0898	0.1019	0.0518	0.1088	0.1297	0.1024	0.1137	0.1237	0.1046	0.1479	0.1159	0.1422			412.8	0.0626	0.0362	0.0247	0.0974
																														413.2	0.0897	0.1025	0.0518	0.1088	0.1285	0.1038	0.1138	0.1231	0.1038	0.1463	0.1159	0.1414			413.2	0.0628	0.0368	0.0248	0.0967
																														413.6	0.0894	0.1019	0.0513	0.1092	0.1306	0.1035	0.1131	0.1227	0.1043	0.1474	0.1165	0.1426			413.6	0.0626	0.0368	0.0249	0.0962
																														414	0.0898	0.1026	0.0523	0.1085	0.1294	0.1042	0.1131	0.1236	0.105	0.1483	0.1148	0.1417			414	0.063	0.0378	0.0249	0.0953
																														414.4	0.0905	0.1021	0.0524	0.1095	0.1292	0.1038	0.114	0.1236	0.1047	0.1478	0.1164	0.1413			414.4	0.0633	0.0373	0.0245	0.097
																														414.8	0.0905	0.1018	0.053	0.1087	0.1291	0.1038	0.1139	0.1229	0.1041	0.1477	0.1152	0.1416			414.8	0.063	0.0367	0.0251	0.0962
																														415.2	0.0902	0.102	0.0527	0.1092	0.13	0.1044	0.1137	0.1241	0.1042	0.1463	0.1154	0.1423			415.2	0.0629	0.0377	0.0242	0.0972
																														415.6	0.0904	0.1024	0.052	0.109	0.1295	0.1043	0.1133	0.1227	0.1043	0.1479	0.1168	0.1419			415.6	0.0628	0.0361	0.0251	0.0969
																														416	0.09	0.1026	0.0529	0.1094	0.1297	0.1047	0.1128	0.1234	0.1043	0.1463	0.1167	0.1419			416	0.0622	0.0362	0.0246	0.0969
																														416.4	0.0906	0.1027	0.0525	0.1085	0.1295	0.1042	0.1132	0.1229	0.1048	0.148	0.1164	0.141			416.4	0.0633	0.0376	0.0248	0.0963
																														416.8	0.091	0.1026	0.0527	0.1085	0.1298	0.1039	0.1138	0.1231	0.1041	0.1476	0.1163	0.1427			416.8	0.0626	0.0376	0.025	0.0971
																														417.2	0.0911	0.1033	0.0525	0.1087	0.1294	0.1049	0.1133	0.1228	0.105	0.148	0.1158	0.1415			417.2	0.0634	0.0366	0.0243	0.0964
																														417.6	0.0904	0.1024	0.053	0.1088	0.1305	0.1032	0.1139	0.124	0.1047	0.1476	0.1151	0.1419			417.6	0.0632	0.0375	0.0248	0.0968
																														418	0.0902	0.1026	0.0521	0.1085	0.1302	0.1048	0.1129	0.1233	0.1048	0.1477	0.116	0.1421			418	0.0626	0.0371	0.0249	0.0965
																														418.4	0.0902	0.1034	0.0523	0.1098	0.1301	0.1046	0.1133	0.124	0.105	0.1473	0.1171	0.1419			418.4	0.0626	0.0366	0.0252	0.0961
																														418.8	0.0907	0.1033	0.053	0.1092	0.1291	0.1042	0.1131	0.1234	0.1043	0.148	0.1183	0.1416			418.8	0.062	0.0368	0.0253	0.0964
																														419.2	0.0914	0.1033	0.053	0.1092	0.1296	0.1053	0.1147	0.1238	0.1039	0.149	0.1165	0.141			419.2	0.0626	0.0373	0.025	0.0973
																														419.6	0.0908	0.1023	0.053	0.1086	0.1293	0.1048	0.1127	0.1232	0.1044	0.1476	0.1164	0.142			419.6	0.0625	0.0373	0.0257	0.0967
																														420	0.0907	0.1034	0.053	0.109	0.1295	0.105	0.1148	0.1224	0.1048	0.1473	0.1169	0.1423			420	0.0631	0.0368	0.0248	0.0969
																														420.4	0.0905	0.1023	0.0526	0.1088	0.1285	0.1045	0.1136	0.1235	0.1053	0.1472	0.116	0.142			420.4	0.0625	0.0376	0.0245	0.0971
																														420.8	0.0914	0.1016	0.0529	0.1086	0.1295	0.1049	0.1143	0.1235	0.1048	0.1475	0.1166	0.142			420.8	0.0623	0.0373	0.0251	0.0969
																														421.2	0.091	0.1022	0.0532	0.1091	0.1303	0.1051	0.1131	0.1236	0.1035	0.1471	0.1161	0.1412			421.2	0.0618	0.0374	0.0251	0.096
																														421.6	0.0913	0.1034	0.0529	0.1089	0.1291	0.1051	0.1136	0.1234	0.1034	0.1471	0.1163	0.1411			421.6	0.0618	0.0379	0.025	0.0974
																														422	0.0913	0.1023	0.0535	0.1084	0.1296	0.1057	0.1142	0.1241	0.1038	0.1468	0.1166	0.142			422	0.0633	0.0374	0.025	0.0974
																														422.4	0.0909	0.1035	0.0541	0.1097	0.13	0.1054	0.1146	0.1227	0.1057	0.1478	0.1156	0.142			422.4	0.0632	0.0374	0.0256	0.0967
																														422.8	0.0902	0.1023	0.0524	0.1082	0.1297	0.1049	0.1133	0.1233	0.1044	0.1476	0.116	0.142			422.8	0.0636	0.0371	0.0242	0.0973
																														423.2	0.0913	0.103	0.0532	0.1092	0.1291	0.1047	0.1137	0.1234	0.1046	0.1479	0.1156	0.1433			423.2	0.0622	0.0378	0.0251	0.0967
																														423.6	0.0915	0.1028	0.0526	0.1084	0.1302	0.1044	0.1125	0.1233	0.1027	0.1467	0.1163	0.1419			423.6	0.0625	0.0383	0.0255	0.0966
																														424	0.0911	0.1037	0.0531	0.1097	0.1303	0.1045	0.1138	0.1241	0.1052	0.1476	0.1171	0.1422			424	0.0628	0.0371	0.0252	0.0964
																														424.4	0.0916	0.1031	0.0534	0.1083	0.1306	0.1044	0.1142	0.1239	0.1042	0.147	0.1155	0.1418			424.4	0.063	0.0371	0.0254	0.0968
																														424.8	0.0911	0.1034	0.0526	0.1089	0.1298	0.1053	0.1145	0.1239	0.1045	0.1479	0.1167	0.1425			424.8	0.0633	0.038	0.024	0.0966
																														425.2	0.0917	0.1037	0.0531	0.1086	0.1292	0.1056	0.1133	0.1242	0.1042	0.1468	0.1163	0.1419			425.2	0.0633	0.0369	0.0251	0.0967
																														425.6	0.092	0.1026	0.0531	0.109	0.1288	0.1054	0.1146	0.1238	0.1048	0.1475	0.1165	0.1419			425.6	0.0626	0.037	0.0251	0.0963
																														426	0.0916	0.103	0.0543	0.1095	0.1281	0.105	0.1129	0.1239	0.1045	0.1475	0.1151	0.1425			426	0.0626	0.0377	0.0254	0.0966
																														426.4	0.0919	0.1028	0.053	0.1088	0.1293	0.1049	0.1139	0.1244	0.1038	0.1473	0.1167	0.1427			426.4	0.0632	0.0374	0.0255	0.0978
																														426.8	0.0915	0.1037	0.0536	0.1082	0.1303	0.1045	0.1132	0.1245	0.1046	0.1483	0.1164	0.1419			426.8	0.063	0.0374	0.0254	0.0968
																														427.2	0.0911	0.1032	0.0525	0.1093	0.1304	0.1063	0.1143	0.1239	0.1051	0.1474	0.116	0.1427			427.2	0.0628	0.0379	0.0256	0.097
																														427.6	0.0912	0.1033	0.0543	0.1086	0.1295	0.1047	0.1135	0.1239	0.1052	0.1483	0.1159	0.1415			427.6	0.0623	0.0361	0.025	0.0966
																														428	0.0914	0.1037	0.0536	0.1098	0.1292	0.1059	0.1124	0.1232	0.1048	0.1473	0.1155	0.1426			428	0.0639	0.0373	0.0253	0.0963
																														428.4	0.0922	0.103	0.0536	0.1088	0.1292	0.1054	0.1132	0.1233	0.1042	0.1481	0.1157	0.1415			428.4	0.0635	0.0376	0.0245	0.0965
																														428.8	0.092	0.1024	0.0536	0.1103	0.1303	0.1058	0.1138	0.1243	0.1046	0.1481	0.1162	0.1423			428.8	0.0641	0.0373	0.0251	0.0974
																														429.2	0.0914	0.1034	0.0544	0.1095	0.1298	0.1057	0.1136	0.1236	0.1045	0.1458	0.1162	0.1414			429.2	0.0634	0.0372	0.0253	0.097
																														429.6	0.0918	0.1032	0.0537	0.1095	0.1301	0.1057	0.1143	0.1233	0.1052	0.1472	0.1162	0.1423			429.6	0.0635	0.0384	0.025	0.0975
																														430	0.0913	0.1035	0.0546	0.1091	0.1296	0.1059	0.1147	0.123	0.105	0.146	0.1153	0.1417			430	0.0633	0.0378	0.0257	0.097
																														430.4	0.0917	0.1039	0.0539	0.1091	0.1299	0.1061	0.1126	0.1242	0.1047	0.1478	0.1162	0.1425			430.4	0.0626	0.037	0.0255	0.0974
																														430.8	0.0921	0.1036	0.0543	0.1089	0.1292	0.1046	0.1126	0.1235	0.1036	0.146	0.1157	0.1415			430.8	0.0645	0.0382	0.0251	0.0969
																														431.2	0.0915	0.1035	0.054	0.109	0.1299	0.1055	0.1133	0.1238	0.1047	0.1479	0.1161	0.1414			431.2	0.0632	0.037	0.0256	0.0972
																														431.6	0.0924	0.1035	0.0538	0.1089	0.1296	0.1058	0.1152	0.1232	0.1048	0.1481	0.1162	0.1419			431.6	0.0634	0.0373	0.0262	0.0968
																														432	0.0919	0.1033	0.0547	0.1092	0.1309	0.1062	0.1143	0.1231	0.1045	0.1473	0.1162	0.1415			432	0.0628	0.0377	0.0255	0.0974
																														432.4	0.0922	0.1044	0.0547	0.1089	0.1292	0.1067	0.1144	0.1231	0.1038	0.1479	0.1161	0.1428			432.4	0.0635	0.0379	0.0258	0.0969
																														432.8	0.0918	0.1036	0.0545	0.1095	0.1299	0.1052	0.1137	0.1231	0.1055	0.1485	0.1163	0.1422			432.8	0.0632	0.038	0.0252	0.0966
																														433.2	0.0927	0.1039	0.0544	0.1096	0.1295	0.1061	0.1133	0.1234	0.1045	0.1485	0.1151	0.1417			433.2	0.0634	0.0382	0.0255	0.0974
																														433.6	0.0915	0.103	0.0529	0.1086	0.1302	0.106	0.1132	0.1235	0.1046	0.1473	0.1167	0.1416			433.6	0.0635	0.0378	0.0255	0.0982
																														434	0.0927	0.1039	0.0541	0.1096	0.1291	0.1063	0.1146	0.124	0.1035	0.1485	0.1161	0.1419			434	0.0634	0.0382	0.0258	0.0974
																														434.4	0.0915	0.1042	0.0547	0.1088	0.1297	0.1062	0.1141	0.1241	0.1042	0.1469	0.1166	0.1413			434.4	0.0633	0.0389	0.0261	0.0975
																														434.8	0.0931	0.1045	0.0554	0.1092	0.13	0.1073	0.1132	0.1231	0.105	0.148	0.1157	0.1425			434.8	0.0631	0.038	0.0258	0.0972
																														435.2	0.0918	0.1047	0.055	0.1094	0.1295	0.1063	0.1133	0.1238	0.1055	0.1471	0.1161	0.1411			435.2	0.0633	0.0377	0.0242	0.0972
																														435.6	0.0919	0.1042	0.0547	0.1095	0.1286	0.1064	0.113	0.1236	0.1045	0.1482	0.1155	0.1426			435.6	0.0637	0.0388	0.0253	0.0973
																														436	0.0916	0.1041	0.0544	0.1096	0.129	0.1061	0.1138	0.124	0.105	0.1475	0.1155	0.142			436	0.0635	0.0373	0.0249	0.0978
																														436.4	0.0927	0.1033	0.0542	0.1087	0.1298	0.1054	0.1138	0.1232	0.1043	0.1471	0.1155	0.1419			436.4	0.063	0.0384	0.0253	0.0977
																														436.8	0.0921	0.1035	0.0547	0.11	0.1292	0.106	0.115	0.1238	0.1038	0.1482	0.1161	0.1422			436.8	0.0641	0.0386	0.0253	0.097
																														437.2	0.0923	0.1037	0.0543	0.1095	0.1304	0.1068	0.1137	0.1229	0.1045	0.146	0.1164	0.142			437.2	0.0632	0.0367	0.0259	0.0975
																														437.6	0.0928	0.1038	0.0552	0.1093	0.1293	0.1063	0.1142	0.1234	0.1039	0.1476	0.1159	0.1425			437.6	0.0631	0.0382	0.026	0.0974
																														438	0.0929	0.1032	0.0543	0.1089	0.1303	0.107	0.1134	0.1243	0.1046	0.1471	0.1171	0.1421			438	0.0633	0.0378	0.0249	0.0977
																														438.4	0.0919	0.1033	0.0541	0.1102	0.1292	0.1061	0.1132	0.1237	0.1047	0.1477	0.116	0.1418			438.4	0.0645	0.0371	0.0255	0.0975
																														438.8	0.092	0.1039	0.0545	0.1096	0.1296	0.1062	0.1133	0.1228	0.1048	0.1471	0.1161	0.1417			438.8	0.0636	0.0377	0.0262	0.0981
																														439.2	0.0919	0.1036	0.0548	0.1091	0.129	0.107	0.115	0.1235	0.1054	0.1471	0.1167	0.1422			439.2	0.0636	0.038	0.0258	0.0973
																														439.6	0.0924	0.1038	0.0547	0.1097	0.1307	0.1069	0.1137	0.1237	0.1042	0.1471	0.1165	0.1417			439.6	0.0636	0.0381	0.0262	0.0981
																														440	0.0935	0.1043	0.0546	0.109	0.13	0.1062	0.1133	0.1239	0.1048	0.1476	0.1162	0.1419			440	0.0635	0.0386	0.0256	0.0969
																														440.4	0.0921	0.1042	0.0557	0.1107	0.1294	0.1062	0.113	0.1235	0.1045	0.1477	0.1165	0.142			440.4	0.0637	0.0381	0.0254	0.0977
																														440.8	0.0935	0.103	0.0552	0.1083	0.1291	0.1062	0.1133	0.1225	0.1048	0.1473	0.1165	0.1424			440.8	0.0641	0.0388	0.0257	0.0971
																														441.2	0.092	0.1035	0.0562	0.1092	0.1294	0.1066	0.1139	0.1225	0.1052	0.147	0.1164	0.1414			441.2	0.0637	0.0374	0.0261	0.0971
																														441.6	0.093	0.1033	0.0546	0.1087	0.129	0.1065	0.1143	0.1231	0.105	0.1467	0.1161	0.1413			441.6	0.0642	0.0383	0.0256	0.0982
																														442	0.0919	0.104	0.0553	0.1095	0.1299	0.1074	0.114	0.123	0.1051	0.1481	0.1163	0.1421			442	0.0642	0.0391	0.0253	0.0981
																														442.4	0.093	0.1041	0.0547	0.1095	0.1295	0.1065	0.1132	0.1232	0.1042	0.1484	0.1169	0.1423			442.4	0.0634	0.0379	0.026	0.0976
																														442.8	0.0923	0.1044	0.0553	0.1098	0.1288	0.1066	0.1129	0.1239	0.1041	0.147	0.1168	0.1429			442.8	0.0632	0.0392	0.026	0.0984
																														443.2	0.0936	0.1031	0.0549	0.1091	0.1293	0.1069	0.1135	0.1233	0.1046	0.1486	0.1168	0.1418			443.2	0.0638	0.0387	0.0261	0.0985
																														443.6	0.0935	0.1042	0.0545	0.1101	0.1299	0.1067	0.1144	0.1227	0.1045	0.1474	0.1153	0.1427			443.6	0.0644	0.039	0.0261	0.0972
																														444	0.0933	0.1037	0.0552	0.1089	0.1299	0.1067	0.1141	0.1235	0.1048	0.147	0.1156	0.1418			444	0.0639	0.0377	0.0259	0.0981
																														444.4	0.0936	0.1051	0.0554	0.1094	0.1289	0.1062	0.1146	0.1224	0.1053	0.1469	0.1157	0.1422			444.4	0.0642	0.0392	0.0257	0.0979
																														444.8	0.0931	0.1048	0.0556	0.109	0.1302	0.1064	0.1145	0.1233	0.105	0.1467	0.1162	0.1414			444.8	0.0636	0.0387	0.0262	0.0981
																														445.2	0.0935	0.1045	0.0549	0.11	0.1292	0.1074	0.113	0.1239	0.1054	0.148	0.1153	0.1425			445.2	0.0637	0.0392	0.0257	0.0982
																														445.6	0.0927	0.1041	0.0554	0.1101	0.1299	0.1072	0.1137	0.1233	0.1044	0.147	0.1171	0.1425			445.6	0.0632	0.0391	0.0259	0.0984
																														446	0.0932	0.1048	0.0548	0.1092	0.1289	0.1072	0.1143	0.1237	0.1046	0.1472	0.116	0.1418			446	0.0638	0.0389	0.0262	0.0977
																														446.4	0.0938	0.1042	0.0552	0.1089	0.1304	0.1072	0.1132	0.1233	0.1044	0.1462	0.1166	0.142			446.4	0.0645	0.0389	0.0257	0.0976
																														446.8	0.0934	0.1051	0.0549	0.1089	0.1294	0.1063	0.1135	0.1227	0.1045	0.148	0.1144	0.1423			446.8	0.0641	0.0385	0.0258	0.0975
																														447.2	0.0934	0.1046	0.0559	0.1092	0.1301	0.1076	0.1136	0.1237	0.1043	0.1468	0.1158	0.1431			447.2	0.0638	0.039	0.0256	0.0979
																														447.6	0.0941	0.1048	0.0561	0.1091	0.1299	0.1063	0.1136	0.1236	0.105	0.1474	0.1166	0.1427			447.6	0.0638	0.039	0.0262	0.0984
																														448	0.0936	0.1045	0.0548	0.1097	0.1302	0.1079	0.114	0.1236	0.1041	0.1477	0.1164	0.1425			448	0.0638	0.0391	0.0256	0.0982
																														448.4	0.0934	0.1038	0.056	0.1096	0.1294	0.1067	0.1138	0.1236	0.1043	0.1477	0.1163	0.142			448.4	0.0639	0.0393	0.0261	0.0978
																														448.8	0.0937	0.1038	0.0552	0.1092	0.129	0.1066	0.114	0.1239	0.1051	0.1474	0.1155	0.1417			448.8	0.0635	0.0387	0.0263	0.0977
																														449.2	0.0934	0.1038	0.0555	0.1099	0.1295	0.1083	0.113	0.1239	0.1047	0.1471	0.116	0.1424			449.2	0.0645	0.038	0.0258	0.0984
																														449.6	0.0941	0.1053	0.0556	0.1086	0.1301	0.1066	0.1141	0.1242	0.1041	0.1468	0.1158	0.1416			449.6	0.0634	0.0387	0.0265	0.0981
																														450	0.0936	0.1048	0.0559	0.1095	0.1294	0.1075	0.1138	0.123	0.106	0.1474	0.1158	0.1432			450	0.0644	0.0394	0.0264	0.0982
																														450.4	0.0938	0.105	0.0563	0.1097	0.1296	0.1075	0.1143	0.1236	0.1046	0.1471	0.1155	0.142			450.4	0.0641	0.0388	0.0261	0.0983
																														450.8	0.0941	0.1047	0.0559	0.1101	0.1295	0.1087	0.1139	0.1236	0.1042	0.1477	0.1166	0.1421			450.8	0.0643	0.0385	0.0257	0.0973
																														451.2	0.094	0.1046	0.0558	0.11	0.1301	0.1075	0.1142	0.1238	0.1051	0.1475	0.1171	0.1424			451.2	0.0645	0.0383	0.0252	0.098
																														451.6	0.0936	0.1046	0.0563	0.1099	0.129	0.1069	0.1135	0.1243	0.1041	0.1472	0.1156	0.1422			451.6	0.0645	0.0384	0.0261	0.0978
																														452	0.0941	0.1041	0.0559	0.1087	0.1299	0.1079	0.1148	0.1232	0.1042	0.1477	0.1167	0.1428			452	0.0638	0.0385	0.0256	0.0989
																														452.4	0.0928	0.1042	0.056	0.1096	0.1301	0.1082	0.1138	0.1237	0.1048	0.147	0.1161	0.1416			452.4	0.064	0.039	0.0271	0.0995
																														452.8	0.0949	0.1036	0.056	0.1094	0.1295	0.1081	0.1145	0.1234	0.1043	0.1475	0.1169	0.1423			452.8	0.0642	0.0387	0.0255	0.0986
																														453.2	0.0931	0.1044	0.0556	0.1099	0.1303	0.1087	0.1137	0.123	0.1051	0.148	0.116	0.1421			453.2	0.0647	0.0395	0.0261	0.0982
																														453.6	0.0936	0.1048	0.0561	0.1095	0.128	0.1074	0.114	0.1231	0.1039	0.1473	0.1161	0.1416			453.6	0.0642	0.0386	0.0257	0.0979
																														454	0.0943	0.1053	0.0558	0.1095	0.1291	0.1073	0.1139	0.1232	0.1048	0.1482	0.1159	0.1431			454	0.0647	0.0398	0.0257	0.0981
																														454.4	0.0936	0.1048	0.056	0.1088	0.1291	0.1075	0.1142	0.1231	0.1047	0.146	0.1161	0.142			454.4	0.0639	0.0381	0.026	0.0978
																														454.8	0.0943	0.1046	0.0566	0.1094	0.1305	0.1072	0.1129	0.1237	0.105	0.1482	0.1168	0.1421			454.8	0.0651	0.0391	0.026	0.0983
																														455.2	0.0935	0.1044	0.0564	0.1094	0.1291	0.108	0.1139	0.1229	0.1052	0.1471	0.1155	0.1418			455.2	0.0638	0.0393	0.0264	0.0977
																														455.6	0.094	0.1052	0.0566	0.109	0.1294	0.1085	0.1141	0.1247	0.1049	0.148	0.1167	0.1416			455.6	0.0652	0.04	0.0262	0.0986
																														456	0.0941	0.1033	0.0566	0.1098	0.1301	0.1072	0.1155	0.1236	0.1052	0.1473	0.117	0.1416			456	0.0644	0.0397	0.0261	0.0988
																														456.4	0.0937	0.1062	0.0568	0.1091	0.1296	0.1077	0.1138	0.1242	0.1047	0.1463	0.1162	0.142			456.4	0.0648	0.0386	0.0264	0.0978
																														456.8	0.0948	0.1046	0.056	0.1094	0.1296	0.107	0.1136	0.1235	0.1042	0.1467	0.1164	0.1421			456.8	0.0643	0.0392	0.0262	0.0985
																														457.2	0.0942	0.1048	0.057	0.1091	0.1302	0.1074	0.1138	0.1232	0.1047	0.148	0.1166	0.1413			457.2	0.0655	0.0393	0.0271	0.0983
																														457.6	0.0948	0.1043	0.0571	0.1092	0.1303	0.108	0.1128	0.1243	0.1053	0.1471	0.1167	0.1419			457.6	0.0646	0.0379	0.0265	0.0986
																														458	0.0938	0.1041	0.0554	0.1096	0.1309	0.1085	0.1137	0.1235	0.1052	0.1473	0.1177	0.1412			458	0.0649	0.0403	0.0255	0.0987
																														458.4	0.0938	0.1042	0.0563	0.1108	0.1303	0.109	0.115	0.1246	0.105	0.1466	0.1153	0.1421			458.4	0.0645	0.0395	0.0263	0.0984
																														458.8	0.0946	0.1045	0.0559	0.1092	0.1296	0.1075	0.1137	0.1225	0.1045	0.1471	0.1165	0.1416			458.8	0.0648	0.0392	0.0267	0.0983
																														459.2	0.0949	0.1044	0.0571	0.1098	0.13	0.1077	0.1137	0.123	0.1041	0.1471	0.1176	0.1417			459.2	0.0645	0.039	0.0262	0.0982
																														459.6	0.0942	0.1049	0.0569	0.1088	0.1289	0.1076	0.1149	0.1234	0.1048	0.1469	0.1162	0.1419			459.6	0.0646	0.0388	0.0265	0.0988
																														460	0.0946	0.1047	0.0573	0.1096	0.1302	0.1075	0.1139	0.124	0.1045	0.1473	0.1156	0.1418			460	0.0653	0.0381	0.0277	0.0987
																														460.4	0.0944	0.1046	0.0568	0.1095	0.131	0.108	0.1133	0.1232	0.1044	0.1479	0.1164	0.1424			460.4	0.0645	0.0405	0.0269	0.0986
																														460.8	0.0941	0.105	0.0576	0.1103	0.1289	0.1084	0.1142	0.1231	0.1041	0.1486	0.1163	0.1422			460.8	0.0652	0.0394	0.0259	0.0993
																														461.2	0.0947	0.1048	0.0571	0.1097	0.1294	0.1076	0.1136	0.1229	0.1044	0.1472	0.1168	0.1416			461.2	0.0655	0.0389	0.027	0.0981
																														461.6	0.0947	0.1038	0.0567	0.1095	0.1299	0.1084	0.1133	0.1242	0.1047	0.1474	0.1155	0.1427			461.6	0.0641	0.0378	0.026	0.0989
																														462	0.0951	0.1057	0.0569	0.1097	0.1297	0.1083	0.1143	0.1237	0.1043	0.1473	0.1164	0.1416			462	0.0655	0.0379	0.027	0.0984
																														462.4	0.0938	0.1041	0.0572	0.1092	0.1288	0.109	0.1138	0.123	0.1047	0.1464	0.1157	0.1422			462.4	0.0645	0.039	0.0268	0.0977
																														462.8	0.0945	0.1043	0.0571	0.1095	0.1305	0.1088	0.1132	0.1237	0.1055	0.1476	0.1158	0.142			462.8	0.0658	0.0395	0.0268	0.0983
																														463.2	0.0941	0.1046	0.057	0.1094	0.1296	0.1087	0.1132	0.1234	0.1048	0.1478	0.1165	0.142			463.2	0.0656	0.04	0.0265	0.0984
																														463.6	0.0951	0.105	0.057	0.1096	0.1303	0.1088	0.1137	0.1238	0.1044	0.1484	0.1163	0.142			463.6	0.0657	0.0393	0.0255	0.0986
																														464	0.0948	0.1045	0.0569	0.1097	0.1298	0.1084	0.1142	0.1239	0.1048	0.1472	0.1157	0.1425			464	0.0649	0.0402	0.0266	0.0974
																														464.4	0.0941	0.105	0.0575	0.1101	0.1298	0.1082	0.1133	0.1241	0.1054	0.1473	0.1169	0.1426			464.4	0.065	0.0401	0.0268	0.0983
																														464.8	0.0943	0.1046	0.0572	0.1099	0.1295	0.1095	0.1135	0.1249	0.1046	0.1469	0.1155	0.1411			464.8	0.0646	0.0389	0.0265	0.0985
																														465.2	0.0943	0.1052	0.0579	0.1102	0.1295	0.1091	0.1134	0.1234	0.1052	0.1471	0.1162	0.1409			465.2	0.0656	0.0396	0.027	0.098
																														465.6	0.0957	0.1049	0.0569	0.11	0.13	0.1091	0.114	0.1239	0.1048	0.1471	0.1159	0.1424			465.6	0.0654	0.0386	0.0262	0.0988
																														466	0.0955	0.1053	0.0577	0.11	0.13	0.1089	0.1139	0.1243	0.1046	0.1479	0.1166	0.1425			466	0.0651	0.0394	0.0271	0.0991
																														466.4	0.0957	0.1059	0.0573	0.1097	0.1301	0.1079	0.1141	0.1231	0.1054	0.1473	0.1162	0.1421			466.4	0.0651	0.0388	0.0259	0.0984
																														466.8	0.0944	0.1046	0.0576	0.1094	0.1301	0.1088	0.1139	0.123	0.1056	0.147	0.1163	0.1423			466.8	0.0658	0.039	0.0264	0.0988
																														467.2	0.095	0.1059	0.0575	0.1097	0.129	0.109	0.1136	0.1232	0.1048	0.1474	0.1159	0.1422			467.2	0.0656	0.0398	0.027	0.0986
																														467.6	0.0956	0.1052	0.0594	0.1093	0.1287	0.109	0.1134	0.1241	0.1046	0.1481	0.1156	0.1422			467.6	0.0658	0.039	0.027	0.0981
																														468	0.0955	0.105	0.0576	0.1101	0.1304	0.1087	0.1131	0.1227	0.1048	0.1464	0.1164	0.1428			468	0.0657	0.0388	0.0271	0.0989
																														468.4	0.0954	0.1048	0.057	0.1091	0.1295	0.1086	0.1147	0.1244	0.1044	0.1469	0.1164	0.142			468.4	0.0656	0.0396	0.026	0.0987
																														468.8	0.0953	0.1054	0.0575	0.1101	0.1296	0.109	0.1133	0.123	0.1041	0.1475	0.1168	0.1424			468.8	0.0652	0.0389	0.0271	0.0985
																														469.2	0.0958	0.1045	0.0576	0.11	0.1302	0.1086	0.114	0.124	0.1048	0.1465	0.1155	0.1419			469.2	0.0657	0.039	0.026	0.0986
																														469.6	0.0948	0.1059	0.0579	0.1092	0.1298	0.1084	0.1135	0.1238	0.1045	0.1472	0.1175	0.1414			469.6	0.0653	0.0392	0.0271	0.0992
																														470	0.0956	0.1052	0.0586	0.11	0.13	0.109	0.1137	0.1232	0.1055	0.1467	0.1162	0.1426			470	0.065	0.0389	0.0263	0.0978
																														470.4	0.0954	0.1055	0.0576	0.1099	0.1301	0.1091	0.114	0.1237	0.1043	0.1475	0.1148	0.1426			470.4	0.0659	0.0396	0.0267	0.099
																														470.8	0.0962	0.1053	0.0574	0.1102	0.1297	0.1096	0.1143	0.1228	0.1043	0.1472	0.116	0.1422			470.8	0.0652	0.0403	0.0268	0.0994
																														471.2	0.0959	0.1056	0.0582	0.1096	0.1298	0.1094	0.1137	0.1237	0.1045	0.1471	0.1158	0.1424			471.2	0.066	0.0406	0.0261	0.0985
																														471.6	0.0951	0.1054	0.0578	0.1097	0.1299	0.1095	0.1147	0.1237	0.1047	0.1466	0.117	0.1425			471.6	0.0656	0.0398	0.0266	0.0997
																														472	0.0958	0.1054	0.058	0.1096	0.1292	0.1086	0.1136	0.1242	0.1042	0.1467	0.1156	0.1419			472	0.0657	0.0394	0.0266	0.0995
																														472.4	0.0956	0.1055	0.0583	0.1098	0.1296	0.1094	0.1139	0.1243	0.1046	0.1477	0.116	0.1407			472.4	0.0657	0.0403	0.0268	0.099
																														472.8	0.0957	0.1047	0.058	0.1093	0.1291	0.1091	0.1142	0.1239	0.1038	0.1466	0.1158	0.1425			472.8	0.0657	0.04	0.0265	0.0983
																														473.2	0.0954	0.1056	0.0581	0.1097	0.1301	0.1083	0.114	0.1235	0.1055	0.1466	0.1155	0.1432			473.2	0.066	0.0393	0.0266	0.0984
																														473.6	0.0957	0.1059	0.0579	0.11	0.1298	0.1098	0.1141	0.1237	0.1048	0.1466	0.115	0.1419			473.6	0.0656	0.0401	0.0269	0.0988
																														474	0.0948	0.1059	0.058	0.1092	0.1297	0.1093	0.1142	0.1225	0.1043	0.1473	0.1165	0.1419			474	0.0657	0.0395	0.0265	0.099
																														474.4	0.0956	0.1053	0.0578	0.1102	0.1308	0.1094	0.1138	0.1236	0.1054	0.147	0.1168	0.1421			474.4	0.066	0.0396	0.0264	0.0992
																														474.8	0.0954	0.1057	0.0583	0.1094	0.1297	0.1083	0.1137	0.1242	0.1041	0.1467	0.1161	0.1415			474.8	0.0661	0.0393	0.0269	0.0991
																														475.2	0.096	0.1048	0.0588	0.1101	0.13	0.1102	0.1141	0.1237	0.1054	0.1484	0.1156	0.1408			475.2	0.0664	0.0392	0.0274	0.099
																														475.6	0.0957	0.1058	0.0583	0.1097	0.1294	0.1096	0.1144	0.1238	0.1044	0.1462	0.1159	0.1415			475.6	0.0667	0.0402	0.0271	0.0995
																														476	0.096	0.1052	0.0584	0.1103	0.1311	0.1102	0.1136	0.1236	0.1052	0.1472	0.1157	0.1428			476	0.0669	0.0408	0.0272	0.0995
																														476.4	0.0961	0.106	0.058	0.1093	0.1311	0.1095	0.1144	0.1231	0.1057	0.1475	0.1165	0.1422			476.4	0.0656	0.0409	0.0254	0.0987
																														476.8	0.0955	0.1059	0.0576	0.11	0.1308	0.1099	0.1133	0.1232	0.1048	0.1464	0.116	0.1412			476.8	0.066	0.041	0.0271	0.0988
																														477.2	0.096	0.1063	0.0584	0.1099	0.1298	0.1093	0.113	0.1232	0.105	0.1479	0.1168	0.1421			477.2	0.0657	0.0394	0.0265	0.0997
																														477.6	0.0968	0.1055	0.058	0.1107	0.1301	0.1095	0.1136	0.1235	0.1044	0.1464	0.1162	0.1426			477.6	0.0669	0.0399	0.0267	0.0993
																														478	0.095	0.1059	0.0588	0.1097	0.1286	0.1104	0.1141	0.1234	0.1042	0.1478	0.1158	0.1425			478	0.0661	0.0399	0.0271	0.0988
																														478.4	0.096	0.105	0.0581	0.1105	0.1291	0.1096	0.1144	0.1234	0.1051	0.1465	0.1157	0.1416			478.4	0.0652	0.0399	0.0269	0.0986
																														478.8	0.0962	0.1055	0.0588	0.1091	0.1309	0.1103	0.1141	0.123	0.1035	0.1475	0.1163	0.1423			478.8	0.0662	0.0407	0.0269	0.0987
																														479.2	0.0952	0.1064	0.0585	0.109	0.1306	0.1097	0.1135	0.1228	0.1039	0.148	0.1167	0.1413			479.2	0.0666	0.0411	0.0265	0.0992
																														479.6	0.0966	0.1062	0.0594	0.11	0.1305	0.1089	0.1135	0.1232	0.1049	0.1477	0.1163	0.142			479.6	0.066	0.0398	0.0263	0.0994
																														480	0.096	0.1054	0.0592	0.1098	0.1296	0.1104	0.1138	0.124	0.1051	0.1476	0.117	0.1414			480	0.0675	0.0389	0.0267	0.0995
																														480.4	0.0963	0.1054	0.0585	0.1097	0.1288	0.1101	0.1144	0.1234	0.1052	0.1471	0.1153	0.1426			480.4	0.066	0.0385	0.0279	0.099
																														480.8	0.0961	0.1059	0.0587	0.1101	0.1293	0.1097	0.114	0.1249	0.1049	0.1471	0.117	0.1427			480.8	0.0663	0.0403	0.0269	0.099
																														481.2	0.0965	0.1057	0.0594	0.1101	0.1296	0.1106	0.1146	0.1238	0.1045	0.147	0.1158	0.142			481.2	0.0656	0.0398	0.0264	0.0987
																														481.6	0.0963	0.1058	0.0588	0.1098	0.1309	0.1088	0.1131	0.1229	0.104	0.1472	0.1163	0.1419			481.6	0.0668	0.0408	0.0276	0.099
																														482	0.0964	0.1056	0.0579	0.1097	0.1292	0.1097	0.1143	0.1236	0.1044	0.1469	0.1159	0.1423			482	0.0667	0.0407	0.0269	0.0986
																														482.4	0.0964	0.1065	0.0593	0.1099	0.1286	0.1088	0.1136	0.1233	0.1041	0.1487	0.1149	0.1422			482.4	0.0665	0.04	0.0272	0.0993
																														482.8	0.0967	0.1055	0.0586	0.1101	0.1299	0.1092	0.1137	0.1236	0.1051	0.1473	0.1169	0.1424			482.8	0.0659	0.0399	0.027	0.0985
																														483.2	0.0961	0.1053	0.0593	0.1094	0.129	0.1102	0.1134	0.1233	0.1049	0.1475	0.1164	0.1424			483.2	0.0676	0.0414	0.0271	0.0997
																														483.6	0.0963	0.1054	0.0591	0.1103	0.1306	0.1091	0.1133	0.1236	0.1048	0.1471	0.1164	0.1424			483.6	0.0658	0.0402	0.0269	0.0996
																														484	0.0971	0.1061	0.0584	0.1102	0.1291	0.1093	0.1142	0.1233	0.104	0.1472	0.1149	0.1418			484	0.0663	0.0408	0.027	0.0996
																														484.4	0.0955	0.1052	0.059	0.1101	0.1301	0.11	0.113	0.1242	0.1046	0.1478	0.1164	0.142			484.4	0.0675	0.0407	0.0274	0.0993
																														484.8	0.097	0.1062	0.0591	0.1102	0.1299	0.1092	0.1143	0.1227	0.1047	0.1472	0.1163	0.1418			484.8	0.0671	0.0398	0.0269	0.1
																														485.2	0.0961	0.1054	0.0596	0.1094	0.1306	0.1099	0.1144	0.1232	0.1048	0.1472	0.1164	0.1421			485.2	0.0667	0.0403	0.0276	0.0996
																														485.6	0.0967	0.1054	0.0593	0.1107	0.1295	0.11	0.1146	0.1223	0.1043	0.1473	0.1165	0.142			485.6	0.066	0.0403	0.0274	0.0991
																														486	0.0971	0.1056	0.0591	0.1102	0.1291	0.1115	0.1139	0.1239	0.1045	0.1476	0.1164	0.1417			486	0.0665	0.0398	0.0273	0.0995
																														486.4	0.0974	0.1057	0.0591	0.1095	0.1294	0.1102	0.1145	0.1234	0.1042	0.1473	0.1154	0.1412			486.4	0.0663	0.0406	0.0276	0.0993
																														486.8	0.0968	0.1057	0.0594	0.1096	0.1297	0.1103	0.1137	0.1229	0.1048	0.1473	0.1158	0.1418			486.8	0.066	0.0411	0.0272	0.0987
																														487.2	0.0965	0.1069	0.0595	0.11	0.1301	0.111	0.1144	0.1229	0.1046	0.1471	0.1157	0.1427			487.2	0.0669	0.0407	0.0266	0.0998
																														487.6	0.0966	0.1057	0.0596	0.1096	0.1299	0.1088	0.1148	0.122	0.1049	0.1472	0.116	0.1426			487.6	0.0668	0.0407	0.0274	0.0987
																														488	0.0958	0.1054	0.0596	0.1099	0.13	0.1105	0.1139	0.123	0.1044	0.1459	0.1172	0.1425			488	0.067	0.0404	0.0276	0.099
																														488.4	0.0971	0.1054	0.0595	0.1097	0.1294	0.1111	0.1138	0.1236	0.1055	0.1474	0.1151	0.1427			488.4	0.0671	0.0408	0.0267	0.0993
																														488.8	0.097	0.1062	0.059	0.1102	0.1304	0.1099	0.1135	0.1238	0.1042	0.1465	0.1158	0.1416			488.8	0.0667	0.0403	0.0278	0.0992
																														489.2	0.0972	0.1065	0.0596	0.1106	0.1302	0.11	0.1133	0.1237	0.1046	0.1471	0.1159	0.1422			489.2	0.0676	0.0411	0.0272	0.0998
																														489.6	0.0961	0.1059	0.0594	0.1093	0.1298	0.11	0.114	0.1229	0.1057	0.1467	0.116	0.1419			489.6	0.067	0.0408	0.0268	0.0991
																														490	0.0965	0.1065	0.0601	0.1103	0.1307	0.111	0.1145	0.1234	0.1051	0.1472	0.1162	0.1417			490	0.0678	0.0416	0.0269	0.1001
																														490.4	0.0973	0.1068	0.059	0.1103	0.1291	0.1106	0.1141	0.1234	0.1048	0.1476	0.1167	0.1425			490.4	0.0665	0.0404	0.0275	0.0999
																														490.8	0.0961	0.1055	0.0599	0.11	0.13	0.1107	0.1136	0.1233	0.1048	0.1476	0.1164	0.1428			490.8	0.0668	0.0405	0.0278	0.1012
																														491.2	0.0973	0.1061	0.0603	0.1097	0.1297	0.1113	0.1134	0.1235	0.1041	0.1473	0.117	0.1412			491.2	0.0667	0.0409	0.0266	0.1005
																														491.6	0.098	0.1056	0.0599	0.11	0.1293	0.1103	0.1129	0.1233	0.1043	0.1468	0.1158	0.1424			491.6	0.0674	0.0416	0.0275	0.1004
																														492	0.097	0.1065	0.0597	0.1096	0.1305	0.1104	0.1137	0.1238	0.1046	0.1476	0.117	0.1421			492	0.0674	0.0412	0.0276	0.0991
																														492.4	0.0961	0.1066	0.0599	0.1096	0.1303	0.1106	0.1143	0.1227	0.1055	0.1477	0.1164	0.1423			492.4	0.0674	0.0407	0.0273	0.1007
																														492.8	0.0975	0.1061	0.0599	0.111	0.13	0.11	0.1146	0.1231	0.1047	0.1476	0.1154	0.1416			492.8	0.0674	0.0406	0.0277	0.0994
																														493.2	0.0967	0.1063	0.0598	0.1104	0.1314	0.1107	0.1136	0.1239	0.1046	0.1467	0.116	0.1418			493.2	0.0667	0.0408	0.0276	0.1004
																														493.6	0.0968	0.1064	0.0608	0.1098	0.1293	0.1107	0.1144	0.1231	0.1044	0.1469	0.1171	0.1425			493.6	0.0671	0.0409	0.0277	0.0995
																														494	0.0969	0.1061	0.0597	0.1097	0.1297	0.1106	0.1134	0.1232	0.1045	0.1458	0.1168	0.1425			494	0.0675	0.0406	0.0277	0.1002
																														494.4	0.0974	0.1071	0.0598	0.1097	0.1297	0.111	0.1146	0.124	0.1048	0.1477	0.1158	0.1429			494.4	0.0675	0.0415	0.0273	0.1
																														494.8	0.097	0.1066	0.0603	0.1103	0.1283	0.11	0.1138	0.1243	0.1047	0.1464	0.1171	0.1421			494.8	0.0673	0.0407	0.0268	0.0994
																														495.2	0.0971	0.1061	0.0608	0.1098	0.1304	0.1104	0.1143	0.1238	0.1048	0.1482	0.1161	0.1424			495.2	0.0677	0.041	0.0276	0.1005
																														495.6	0.0972	0.1067	0.0602	0.1109	0.1306	0.1104	0.1134	0.1244	0.1048	0.1471	0.117	0.141			495.6	0.0677	0.04	0.0268	0.0996
																														496	0.0973	0.106	0.0602	0.1098	0.13	0.111	0.1132	0.1233	0.1051	0.1472	0.117	0.1427			496	0.0679	0.0415	0.0276	0.0998
																														496.4	0.0983	0.1064	0.0601	0.11	0.1302	0.1104	0.1136	0.1246	0.1051	0.1466	0.1159	0.1418			496.4	0.0679	0.0409	0.0279	0.1004
																														496.8	0.0973	0.1065	0.0598	0.1104	0.13	0.1101	0.1139	0.1243	0.1046	0.1461	0.1168	0.1415			496.8	0.0676	0.0412	0.0267	0.1
																														497.2	0.0978	0.1069	0.0614	0.1094	0.13	0.1117	0.114	0.1241	0.1036	0.1472	0.1154	0.1416			497.2	0.0685	0.0417	0.0279	0.0992
																														497.6	0.0975	0.1066	0.0605	0.1099	0.1304	0.1107	0.1138	0.1237	0.1047	0.1479	0.1157	0.1432			497.6	0.0677	0.0406	0.0281	0.0995
																														498	0.0985	0.1068	0.0614	0.1102	0.13	0.1106	0.1138	0.1232	0.104	0.147	0.1158	0.141			498	0.0672	0.0402	0.0282	0.0996
																														498.4	0.0971	0.1057	0.0605	0.111	0.1304	0.1108	0.1142	0.1239	0.1053	0.1475	0.1164	0.1417			498.4	0.0675	0.0409	0.0277	0.1
																														498.8	0.0981	0.1064	0.0604	0.1098	0.1302	0.111	0.1141	0.1249	0.1042	0.1469	0.1168	0.1429			498.8	0.0678	0.0416	0.0275	0.1
																														499.2	0.0977	0.1068	0.0607	0.1101	0.1292	0.1107	0.1152	0.1234	0.1039	0.1469	0.1157	0.1423			499.2	0.0684	0.0411	0.0279	0.0998
																														499.6	0.0976	0.1072	0.0607	0.1096	0.13	0.1111	0.1145	0.1237	0.1052	0.1473	0.1167	0.1417			499.6	0.0684	0.0411	0.028	0.1002
																														500	0.0978	0.1062	0.0603	0.1096	0.1292	0.1112	0.1138	0.1232	0.1057	0.1477	0.116	0.143			500	0.0673	0.0412	0.0269	0.1001
																														500.4	0.0977	0.1061	0.0613	0.1106	0.1296	0.1112	0.1133	0.1227	0.1046	0.1476	0.1166	0.1424			500.4	0.068	0.0406	0.0271	0.1003
																														500.8	0.0981	0.1057	0.0609	0.1101	0.1307	0.1116	0.1133	0.1232	0.1041	0.1472	0.117	0.1421			500.8	0.0676	0.0416	0.0268	0.0998
																														501.2	0.0977	0.1059	0.0602	0.1106	0.1302	0.1113	0.1132	0.1227	0.105	0.1474	0.1166	0.1431			501.2	0.0685	0.0416	0.027	0.1
																														501.6	0.0977	0.1061	0.0606	0.1101	0.1297	0.1122	0.1134	0.1238	0.1047	0.1475	0.1169	0.1422			501.6	0.068	0.0411	0.0279	0.1002
																														502	0.0976	0.107	0.0603	0.1097	0.1304	0.1116	0.1138	0.1241	0.1043	0.1475	0.1162	0.1416			502	0.0677	0.0414	0.0277	0.0995
																														502.4	0.0976	0.1066	0.061	0.1101	0.1297	0.1114	0.1143	0.124	0.104	0.1481	0.1162	0.143			502.4	0.0685	0.0413	0.0281	0.1003
																														502.8	0.0978	0.1066	0.0608	0.1103	0.1308	0.1116	0.1142	0.1233	0.1049	0.1478	0.116	0.1423			502.8	0.0681	0.0413	0.0273	0.1005
																														503.2	0.0987	0.1063	0.0606	0.1101	0.1306	0.1108	0.1139	0.1234	0.1048	0.1481	0.1156	0.1423			503.2	0.0679	0.0402	0.0284	0.1001
																														503.6	0.0982	0.1062	0.0614	0.1112	0.1287	0.1108	0.1143	0.1225	0.1042	0.1466	0.1167	0.1415			503.6	0.0679	0.0412	0.0282	0.0993
																														504	0.0979	0.1057	0.0602	0.1093	0.1298	0.1122	0.1141	0.1235	0.104	0.1467	0.1165	0.1421			504	0.0677	0.0416	0.028	0.1001
																														504.4	0.0979	0.1069	0.0605	0.1099	0.1302	0.1099	0.1132	0.1234	0.1043	0.1481	0.1165	0.1428			504.4	0.0693	0.0416	0.0275	0.1009
																														504.8	0.0983	0.1065	0.0612	0.1099	0.1307	0.1111	0.1137	0.1239	0.105	0.1474	0.1168	0.1422			504.8	0.068	0.0426	0.0281	0.1006
																														505.2	0.0983	0.1065	0.0605	0.1099	0.13	0.1107	0.114	0.1237	0.1045	0.1473	0.1153	0.1422			505.2	0.0687	0.0423	0.0279	0.1007
																														505.6	0.0985	0.106	0.0606	0.1104	0.1299	0.1114	0.1136	0.1234	0.105	0.147	0.1159	0.1429			505.6	0.0676	0.0408	0.0277	0.1003
																														506	0.098	0.1064	0.0608	0.11	0.1304	0.1116	0.1146	0.1232	0.1047	0.1482	0.1157	0.1425			506	0.0681	0.0416	0.0275	0.1004
																														506.4	0.0978	0.1058	0.0613	0.1101	0.1303	0.1115	0.1138	0.1234	0.1045	0.1466	0.117	0.1417			506.4	0.0686	0.0418	0.028	0.1005
																														506.8	0.0985	0.1068	0.061	0.1097	0.1303	0.1111	0.1143	0.1227	0.1051	0.1472	0.1165	0.1423			506.8	0.068	0.0414	0.0283	0.1001
																														507.2	0.0989	0.1072	0.0608	0.1104	0.1293	0.111	0.1141	0.1243	0.1042	0.1471	0.1162	0.1423			507.2	0.0681	0.0418	0.0281	0.101
																														507.6	0.0988	0.1065	0.0617	0.11	0.1296	0.1116	0.1147	0.1232	0.1056	0.1477	0.1161	0.1423			507.6	0.0693	0.0416	0.0274	0.1001
																														508	0.0994	0.1052	0.0617	0.1106	0.1296	0.1122	0.1139	0.1226	0.1046	0.1473	0.1158	0.1419			508	0.0688	0.0415	0.0278	0.1
																														508.4	0.0983	0.1069	0.0613	0.1099	0.1304	0.112	0.1138	0.1231	0.1048	0.1466	0.1164	0.1426			508.4	0.0687	0.0411	0.0271	0.1001
																														508.8	0.0982	0.1065	0.0608	0.1095	0.1308	0.1111	0.1133	0.1235	0.105	0.1471	0.1166	0.1423			508.8	0.069	0.0412	0.0276	0.1004
																														509.2	0.0987	0.1063	0.0608	0.1102	0.1306	0.1121	0.1141	0.1232	0.1046	0.1481	0.1161	0.142			509.2	0.0686	0.0421	0.0284	0.1012
																														509.6	0.0981	0.1068	0.0611	0.1101	0.1293	0.1114	0.1142	0.123	0.1047	0.1471	0.1166	0.1423			509.6	0.0687	0.0409	0.0276	0.1006
																														510	0.0989	0.1068	0.0614	0.1098	0.1297	0.1113	0.1133	0.1247	0.105	0.1469	0.1164	0.1422			510	0.0686	0.0409	0.0278	0.1011
																														510.4	0.098	0.1073	0.0615	0.1105	0.1295	0.1119	0.1132	0.1239	0.1048	0.1469	0.1158	0.1424			510.4	0.0681	0.0408	0.0271	0.1005
																														510.8	0.0985	0.1064	0.0623	0.1095	0.1314	0.1116	0.1136	0.1239	0.1044	0.1477	0.1156	0.1423			510.8	0.0688	0.0414	0.0279	0.1002
																														511.2	0.0985	0.1061	0.0618	0.1097	0.13	0.112	0.1144	0.1227	0.1048	0.1467	0.1157	0.1422			511.2	0.0686	0.0412	0.0275	0.1
																														511.6	0.0982	0.1065	0.0617	0.1101	0.1303	0.1115	0.1138	0.1234	0.1042	0.1469	0.1168	0.1418			511.6	0.0691	0.0414	0.0273	0.1
																														512	0.0986	0.1077	0.0615	0.1095	0.1302	0.1117	0.1139	0.1231	0.1054	0.1466	0.1151	0.1425			512	0.0688	0.0408	0.0277	0.1008
																														512.4	0.0989	0.1068	0.0624	0.1101	0.1298	0.1115	0.1127	0.1235	0.1048	0.148	0.1165	0.1431			512.4	0.068	0.0425	0.0276	0.1004
																														512.8	0.0986	0.1057	0.0616	0.1104	0.1304	0.1112	0.1147	0.1245	0.1041	0.1479	0.1161	0.1436			512.8	0.0684	0.041	0.0274	0.1001
																														513.2	0.099	0.1074	0.0624	0.1108	0.1301	0.1114	0.1135	0.1236	0.1052	0.1475	0.1162	0.1427			513.2	0.0685	0.0418	0.0277	0.1003
																														513.6	0.0982	0.1064	0.0618	0.1099	0.1307	0.1108	0.1141	0.1246	0.1045	0.1461	0.1159	0.1422			513.6	0.0685	0.0416	0.0284	0.0999
																														514	0.0974	0.1063	0.0619	0.1101	0.1299	0.1108	0.1141	0.1234	0.105	0.1461	0.1167	0.1425			514	0.0691	0.0418	0.0289	0.1007
																														514.4	0.0987	0.1065	0.0616	0.1103	0.131	0.1122	0.1142	0.1238	0.1046	0.147	0.1167	0.1418			514.4	0.0685	0.0416	0.0282	0.1004
																														514.8	0.0988	0.107	0.0613	0.1105	0.1298	0.1118	0.1128	0.1226	0.1044	0.1461	0.1168	0.142			514.8	0.0688	0.041	0.028	0.1007
																														515.2	0.0989	0.1075	0.0617	0.1105	0.1296	0.112	0.1137	0.1241	0.1057	0.1458	0.1162	0.1431			515.2	0.0685	0.0415	0.0277	0.1008
																														515.6	0.0986	0.1064	0.0619	0.1094	0.1295	0.1115	0.1134	0.1232	0.1049	0.1467	0.1168	0.1426			515.6	0.0694	0.0414	0.0274	0.1002
																														516	0.0988	0.1067	0.0625	0.1105	0.1292	0.1117	0.1139	0.1241	0.1046	0.147	0.116	0.1424			516	0.0695	0.0416	0.0284	0.0999
																														516.4	0.0988	0.1075	0.0621	0.1089	0.13	0.1122	0.1137	0.1232	0.1049	0.1478	0.1154	0.1419			516.4	0.0688	0.0416	0.0284	0.101
																														516.8	0.099	0.1066	0.0625	0.1099	0.1291	0.1116	0.1132	0.1237	0.1036	0.1478	0.1162	0.1427			516.8	0.0701	0.0418	0.0277	0.1008
																														517.2	0.0987	0.1072	0.0609	0.11	0.1303	0.113	0.1142	0.1231	0.1047	0.1471	0.1164	0.1418			517.2	0.0692	0.0422	0.0281	0.1003
																														517.6	0.0993	0.1074	0.0624	0.1107	0.13	0.1116	0.1135	0.1229	0.1057	0.1474	0.1172	0.1424			517.6	0.069	0.0417	0.0281	0.1001
																														518	0.0987	0.1062	0.0616	0.1106	0.129	0.1121	0.114	0.1234	0.1046	0.1467	0.1161	0.1425			518	0.0695	0.0411	0.0276	0.1018
																														518.4	0.098	0.1068	0.0622	0.1101	0.1301	0.1114	0.1132	0.1239	0.105	0.1473	0.116	0.142			518.4	0.0691	0.0415	0.0284	0.1012
																														518.8	0.0993	0.1063	0.0625	0.1106	0.1289	0.1112	0.1143	0.1241	0.1036	0.1459	0.1156	0.1425			518.8	0.0694	0.0415	0.0271	0.1016
																														519.2	0.0995	0.1064	0.063	0.1098	0.1298	0.1123	0.1129	0.1235	0.1044	0.1466	0.1154	0.1422			519.2	0.0688	0.042	0.0282	0.0999
																														519.6	0.1002	0.1074	0.062	0.1102	0.1307	0.112	0.1137	0.1229	0.1046	0.1478	0.1159	0.143			519.6	0.0694	0.0418	0.0277	0.1008
																														520	0.0983	0.1071	0.0624	0.1104	0.1292	0.1112	0.1129	0.1235	0.1044	0.1457	0.1166	0.1419			520	0.0692	0.0412	0.0277	0.1008
																														520.4	0.0991	0.1072	0.0632	0.1097	0.1301	0.1115	0.1139	0.1236	0.1047	0.1472	0.1168	0.1422			520.4	0.0695	0.0415	0.0276	0.1003
																														520.8	0.0998	0.1074	0.0622	0.1101	0.1309	0.1134	0.1136	0.1242	0.1049	0.1466	0.1159	0.1419			520.8	0.0698	0.0411	0.0278	0.1006
																														521.2	0.099	0.1071	0.0626	0.11	0.1288	0.1108	0.1141	0.1234	0.1045	0.147	0.1166	0.1423			521.2	0.0693	0.0416	0.0284	0.101
																														521.6	0.1002	0.107	0.0627	0.1101	0.1299	0.113	0.1137	0.1226	0.1042	0.1469	0.1159	0.1423			521.6	0.0699	0.0421	0.0289	0.1008
																														522	0.0989	0.1074	0.0622	0.1099	0.1296	0.1118	0.1134	0.1231	0.1053	0.1467	0.1166	0.1424			522	0.0695	0.0421	0.0278	0.1009
																														522.4	0.0995	0.1071	0.0622	0.1102	0.1297	0.1118	0.1143	0.1238	0.1048	0.148	0.1162	0.1435			522.4	0.0692	0.0421	0.0278	0.1008
																														522.8	0.0986	0.1077	0.0633	0.1101	0.1295	0.1117	0.1137	0.1247	0.1049	0.1473	0.1163	0.1428			522.8	0.0692	0.0408	0.0293	0.1008
																														523.2	0.0983	0.1073	0.0625	0.11	0.1303	0.112	0.1148	0.1229	0.1048	0.148	0.1166	0.1418			523.2	0.0697	0.0416	0.0283	0.101
																														523.6	0.0994	0.1071	0.0629	0.1097	0.1299	0.112	0.1149	0.1243	0.1046	0.1465	0.1155	0.1422			523.6	0.0702	0.0416	0.0277	0.1001
																														524	0.0989	0.1072	0.0627	0.1102	0.13	0.1122	0.1139	0.1233	0.1037	0.1462	0.116	0.1423			524	0.0695	0.0413	0.0286	0.1006
																														524.4	0.1	0.1076	0.0622	0.1102	0.1298	0.1122	0.1133	0.1238	0.1052	0.1455	0.1159	0.1429			524.4	0.07	0.0421	0.0277	0.1012
																														524.8	0.0997	0.1078	0.062	0.111	0.131	0.1124	0.1138	0.1226	0.104	0.1466	0.1165	0.1427			524.8	0.0699	0.0411	0.0286	0.1016
																														525.2	0.0998	0.1079	0.0625	0.1109	0.1299	0.1119	0.114	0.1234	0.1047	0.1468	0.1162	0.1423			525.2	0.0699	0.0423	0.0277	0.1009
																														525.6	0.0991	0.1065	0.0628	0.1106	0.1305	0.1126	0.1145	0.1231	0.1048	0.148	0.1169	0.1417			525.6	0.0705	0.0416	0.0284	0.1013
																														526	0.1003	0.1073	0.0633	0.1101	0.1293	0.1121	0.114	0.1238	0.105	0.1473	0.1159	0.1423			526	0.069	0.0417	0.0288	0.1011
																														526.4	0.1003	0.1076	0.0634	0.1101	0.1292	0.1124	0.1144	0.1243	0.1043	0.1462	0.1163	0.1421			526.4	0.0699	0.041	0.0287	0.1009
																														526.8	0.0999	0.1067	0.063	0.1099	0.1296	0.1125	0.1137	0.1241	0.1038	0.147	0.1155	0.1431			526.8	0.0698	0.0419	0.028	0.0999
																														527.2	0.0999	0.1073	0.0626	0.1102	0.1303	0.1134	0.1141	0.1229	0.1048	0.1478	0.1166	0.1427			527.2	0.0692	0.0414	0.0278	0.101
																														527.6	0.0997	0.1074	0.0635	0.1109	0.1301	0.1127	0.115	0.1241	0.1051	0.146	0.1173	0.142			527.6	0.0702	0.0427	0.0285	0.1013
																														528	0.0991	0.1082	0.063	0.1108	0.1303	0.1131	0.1145	0.1227	0.1043	0.1467	0.1168	0.1412			528	0.0705	0.042	0.0281	0.1013
																														528.4	0.1001	0.1071	0.064	0.1108	0.1297	0.1118	0.1139	0.1244	0.1055	0.1464	0.1163	0.1424			528.4	0.07	0.0421	0.0287	0.1011
																														528.8	0.1005	0.1069	0.0629	0.1107	0.1297	0.1122	0.1142	0.1235	0.1047	0.1473	0.1165	0.1423			528.8	0.0701	0.0417	0.0279	0.1007
																														529.2	0.0995	0.1072	0.0622	0.1102	0.1307	0.113	0.1132	0.124	0.1043	0.1467	0.1161	0.1421			529.2	0.0696	0.0416	0.0284	0.1019
																														529.6	0.0992	0.1077	0.0631	0.1106	0.1305	0.1131	0.1139	0.1233	0.1041	0.1465	0.1164	0.1424			529.6	0.07	0.0431	0.0278	0.1011
																														530	0.0994	0.1075	0.063	0.1102	0.1304	0.113	0.1143	0.1225	0.1048	0.148	0.1162	0.1434			530	0.0698	0.0417	0.0284	0.1024
																														530.4	0.0999	0.1078	0.0637	0.1114	0.1306	0.1122	0.1139	0.1242	0.1052	0.1472	0.1166	0.1419			530.4	0.0705	0.0423	0.0282	0.1006
																														530.8	0.0994	0.1063	0.0632	0.1102	0.1299	0.1124	0.1146	0.123	0.105	0.147	0.117	0.1425			530.8	0.0699	0.0424	0.0281	0.1014
																														531.2	0.0995	0.1071	0.0641	0.11	0.1294	0.1122	0.1141	0.1231	0.105	0.1471	0.1151	0.1426			531.2	0.0701	0.0427	0.0282	0.1012
																														531.6	0.0999	0.1065	0.0638	0.1101	0.1299	0.1127	0.1135	0.1236	0.1053	0.1466	0.1164	0.1425			531.6	0.0693	0.0416	0.028	0.1013
																														532	0.099	0.107	0.0624	0.1096	0.1298	0.1139	0.1138	0.1237	0.104	0.1473	0.117	0.1424			532	0.07	0.0425	0.0285	0.1004
																														532.4	0.101	0.1073	0.0637	0.1099	0.13	0.1131	0.1137	0.1238	0.1053	0.1473	0.1157	0.1425			532.4	0.07	0.0425	0.0284	0.1021
																														532.8	0.0998	0.107	0.0636	0.1105	0.1289	0.1136	0.1147	0.1243	0.1043	0.1475	0.1171	0.1421			532.8	0.0703	0.0429	0.0287	0.1017
																														533.2	0.1002	0.1075	0.0637	0.11	0.1287	0.1129	0.1141	0.1224	0.1044	0.1464	0.1162	0.1417			533.2	0.0709	0.0422	0.0284	0.1016
																														533.6	0.1002	0.1071	0.0632	0.1108	0.1296	0.1123	0.1154	0.1223	0.1047	0.1471	0.1171	0.1413			533.6	0.0707	0.0418	0.0287	0.1003
																														534	0.1001	0.1071	0.0636	0.1094	0.1297	0.1134	0.1142	0.1234	0.1046	0.1472	0.1163	0.1427			534	0.0701	0.0417	0.0286	0.102
																														534.4	0.1003	0.107	0.0627	0.1108	0.1303	0.1126	0.1131	0.1238	0.1047	0.1477	0.1162	0.1427			534.4	0.0707	0.0426	0.0285	0.1008
																														534.8	0.1005	0.107	0.0634	0.1101	0.1298	0.1129	0.1134	0.1237	0.105	0.1472	0.1159	0.1422			534.8	0.0701	0.0426	0.0286	0.1002
																														535.2	0.1001	0.1066	0.0636	0.1112	0.13	0.1131	0.1138	0.1244	0.1053	0.147	0.1163	0.1429			535.2	0.0713	0.043	0.029	0.1016
																														535.6	0.1006	0.1068	0.0641	0.1105	0.1307	0.1139	0.1145	0.1221	0.1046	0.1467	0.1159	0.1425			535.6	0.0705	0.0425	0.028	0.1011
																														536	0.1011	0.1067	0.0643	0.1108	0.1291	0.1124	0.1143	0.1231	0.1047	0.146	0.1156	0.1423			536	0.0708	0.0419	0.0279	0.1019
																														536.4	0.0998	0.107	0.0636	0.1096	0.1296	0.1127	0.1137	0.1237	0.1042	0.146	0.1169	0.1423			536.4	0.0706	0.0417	0.0285	0.101
																														536.8	0.1002	0.1078	0.0635	0.1103	0.1298	0.1136	0.1141	0.1238	0.1051	0.147	0.1161	0.1415			536.8	0.0704	0.0418	0.0282	0.1008
																														537.2	0.0994	0.107	0.0636	0.1103	0.1296	0.1134	0.1136	0.1228	0.1046	0.1475	0.1161	0.1422			537.2	0.0708	0.0421	0.0288	0.1014
																														537.6	0.1005	0.1075	0.0644	0.1103	0.1301	0.113	0.1143	0.1231	0.105	0.1482	0.1161	0.1422			537.6	0.0708	0.0431	0.0291	0.1011
																														538	0.1001	0.1073	0.0647	0.1113	0.1298	0.113	0.114	0.1232	0.1045	0.1469	0.1172	0.143			538	0.0704	0.0424	0.0281	0.1016
																														538.4	0.0999	0.1066	0.0644	0.1096	0.1299	0.1133	0.1137	0.1234	0.1036	0.1471	0.116	0.1419			538.4	0.0708	0.0419	0.0285	0.1006
																														538.8	0.1006	0.1074	0.0644	0.11	0.13	0.1134	0.1148	0.124	0.1053	0.1461	0.1171	0.1427			538.8	0.0705	0.0424	0.0283	0.1016
																														539.2	0.0997	0.1076	0.0636	0.1103	0.13	0.113	0.113	0.1236	0.1043	0.1466	0.1164	0.1421			539.2	0.0711	0.0415	0.0283	0.1016
																														539.6	0.1	0.1086	0.0641	0.1108	0.1304	0.113	0.1139	0.124	0.1043	0.1472	0.1161	0.1424			539.6	0.0712	0.0419	0.0286	0.1017
																														540	0.1006	0.108	0.064	0.11	0.1286	0.1137	0.1141	0.1234	0.1053	0.1467	0.1165	0.1413			540	0.0709	0.0429	0.0291	0.102
																														540.4	0.1	0.1078	0.0645	0.1107	0.1299	0.1138	0.1145	0.1231	0.105	0.1467	0.115	0.142			540.4	0.0713	0.0433	0.0281	0.1017
																														540.8	0.1007	0.1068	0.0647	0.1104	0.13	0.1137	0.1136	0.1233	0.1054	0.1474	0.1167	0.143			540.8	0.071	0.0415	0.0289	0.102
																														541.2	0.1005	0.107	0.0651	0.1105	0.1304	0.1134	0.1135	0.1226	0.105	0.1465	0.1178	0.1423			541.2	0.0715	0.0419	0.0279	0.1013
																														541.6	0.0999	0.1081	0.0636	0.1098	0.1295	0.1139	0.1143	0.1236	0.1054	0.1472	0.1168	0.1423			541.6	0.0711	0.0416	0.0291	0.1019
																														542	0.1009	0.1078	0.0645	0.11	0.1304	0.1131	0.1145	0.1238	0.1052	0.1474	0.1161	0.142			542	0.0706	0.0425	0.0287	0.1013
																														542.4	0.1011	0.1076	0.0639	0.1102	0.1293	0.1134	0.1136	0.1236	0.1048	0.1472	0.1165	0.1422			542.4	0.0706	0.0428	0.0288	0.1018
																														542.8	0.1005	0.107	0.0647	0.1106	0.13	0.1134	0.1137	0.1229	0.1045	0.1469	0.1162	0.1426			542.8	0.071	0.043	0.0286	0.101
																														543.2	0.1011	0.1072	0.0643	0.111	0.1292	0.113	0.1139	0.124	0.1038	0.1476	0.1163	0.1424			543.2	0.0705	0.0421	0.028	0.1012
																														543.6	0.1005	0.1073	0.0643	0.1099	0.13	0.1139	0.1136	0.1238	0.105	0.1467	0.1163	0.1414			543.6	0.0701	0.0421	0.0286	0.1011
																														544	0.0998	0.1079	0.0639	0.1106	0.1299	0.113	0.1137	0.123	0.1057	0.1471	0.117	0.143			544	0.0709	0.0421	0.0291	0.102
																														544.4	0.1008	0.1085	0.0648	0.1101	0.1299	0.1136	0.1133	0.1239	0.1054	0.1478	0.1168	0.1422			544.4	0.0702	0.0426	0.0285	0.1015
																														544.8	0.1005	0.108	0.0641	0.1101	0.1298	0.1127	0.1148	0.1234	0.1047	0.1472	0.1164	0.1419			544.8	0.0715	0.0426	0.0287	0.1023
																														545.2	0.1006	0.1068	0.0645	0.1114	0.1297	0.1123	0.1136	0.1248	0.1052	0.1478	0.1167	0.1421			545.2	0.0714	0.0424	0.0286	0.1009
																														545.6	0.1011	0.1072	0.0641	0.1101	0.1305	0.1131	0.1138	0.1222	0.1056	0.147	0.1164	0.1432			545.6	0.0713	0.0424	0.0284	0.1011
																														546	0.1003	0.1064	0.0648	0.1102	0.1301	0.1134	0.1137	0.1241	0.1052	0.1473	0.1162	0.1417			546	0.0719	0.0413	0.0284	0.1014
																														546.4	0.1007	0.1077	0.064	0.1106	0.1298	0.1133	0.1139	0.124	0.1049	0.1464	0.1164	0.1433			546.4	0.0702	0.0414	0.0285	0.1021
																														546.8	0.1007	0.1085	0.0645	0.1097	0.1306	0.1128	0.1139	0.1231	0.1043	0.1471	0.117	0.1428			546.8	0.0703	0.0423	0.0289	0.1025
																														547.2	0.1007	0.109	0.0647	0.1102	0.1306	0.113	0.1141	0.1233	0.1048	0.1467	0.1159	0.1423			547.2	0.0715	0.0417	0.0291	0.1027
																														547.6	0.1012	0.1079	0.0647	0.1105	0.13	0.1132	0.1129	0.1231	0.1045	0.1473	0.1164	0.1422			547.6	0.0711	0.0421	0.0284	0.1011
																														548	0.1005	0.1073	0.0649	0.1103	0.13	0.1135	0.1142	0.1237	0.1054	0.1476	0.1162	0.1421			548	0.0713	0.043	0.0291	0.101
																														548.4	0.1012	0.1074	0.0642	0.1106	0.1295	0.1133	0.1141	0.1239	0.105	0.1473	0.116	0.143			548.4	0.0709	0.0426	0.0286	0.1016
																														548.8	0.0995	0.1082	0.0644	0.1106	0.1303	0.1127	0.1132	0.1248	0.1044	0.1456	0.1166	0.1424			548.8	0.0716	0.043	0.0283	0.1025
																														549.2	0.1007	0.1078	0.0648	0.1109	0.1294	0.1139	0.1145	0.1239	0.1047	0.1477	0.1166	0.1428			549.2	0.0706	0.0425	0.0286	0.1022
																														549.6	0.1015	0.108	0.0653	0.1107	0.1304	0.1135	0.1145	0.1237	0.1035	0.147	0.1166	0.1423			549.6	0.0716	0.0425	0.029	0.1016
																														550	0.1009	0.1077	0.0642	0.1102	0.1296	0.1143	0.1139	0.1242	0.1048	0.1472	0.1164	0.1423			550	0.0721	0.0426	0.0294	0.1013
																														550.4	0.1018	0.1081	0.0647	0.1108	0.1293	0.1137	0.1133	0.1238	0.1051	0.1456	0.1164	0.1427			550.4	0.0716	0.0431	0.0293	0.1022
																														550.8	0.1009	0.1071	0.0653	0.1102	0.13	0.1139	0.113	0.1246	0.1047	0.1459	0.1151	0.1422			550.8	0.0722	0.0435	0.0285	0.1008
																														551.2	0.1002	0.107	0.065	0.1103	0.1306	0.1134	0.114	0.1228	0.1042	0.1469	0.1163	0.1429			551.2	0.0705	0.0417	0.0284	0.1023
																														551.6	0.101	0.1072	0.065	0.1108	0.1308	0.1138	0.1142	0.1234	0.1047	0.1471	0.1166	0.1424			551.6	0.0721	0.0433	0.0295	0.1017
																														552	0.1008	0.1082	0.0655	0.1105	0.1291	0.1142	0.1146	0.1229	0.1046	0.1467	0.1153	0.1419			552	0.0708	0.0423	0.0294	0.102
																														552.4	0.1013	0.1082	0.0655	0.1108	0.1296	0.1137	0.1138	0.1233	0.1055	0.1467	0.1171	0.1423			552.4	0.0717	0.0435	0.0289	0.1012
																														552.8	0.1009	0.1077	0.0652	0.1102	0.1302	0.114	0.1139	0.123	0.1043	0.1471	0.1158	0.1427			552.8	0.0711	0.0429	0.0295	0.1021
																														553.2	0.1015	0.1075	0.0654	0.1101	0.1297	0.1136	0.1143	0.1238	0.105	0.1465	0.1161	0.1423			553.2	0.0717	0.0431	0.0286	0.1014
																														553.6	0.1015	0.1078	0.0651	0.1108	0.1292	0.1139	0.1136	0.1241	0.1042	0.1464	0.1162	0.1428			553.6	0.0721	0.043	0.0284	0.1024
																														554	0.1017	0.1069	0.0655	0.1106	0.1308	0.1137	0.115	0.1239	0.1055	0.1467	0.1164	0.1418			554	0.0712	0.0423	0.0293	0.1013
																														554.4	0.1023	0.1082	0.0653	0.1109	0.1295	0.1134	0.1139	0.1236	0.1054	0.1464	0.1162	0.1423			554.4	0.0723	0.0433	0.0298	0.1011
																														554.8	0.1014	0.1084	0.0654	0.1102	0.1304	0.1135	0.1144	0.1234	0.1044	0.1474	0.1158	0.1426			554.8	0.0711	0.0432	0.029	0.1015
																														555.2	0.1006	0.108	0.0653	0.1111	0.129	0.1143	0.1132	0.1232	0.1046	0.1473	0.1161	0.142			555.2	0.0713	0.0432	0.0296	0.1021
																														555.6	0.1018	0.107	0.0655	0.1101	0.129	0.1136	0.1139	0.1236	0.1052	0.1475	0.1161	0.1431			555.6	0.0724	0.0431	0.0289	0.1021
																														556	0.1013	0.1076	0.0659	0.1103	0.1285	0.1144	0.1142	0.1239	0.1046	0.1475	0.116	0.1416			556	0.0719	0.0419	0.0293	0.1031
																														556.4	0.102	0.1073	0.0656	0.1099	0.1294	0.113	0.1139	0.1239	0.1058	0.1457	0.1162	0.1427			556.4	0.0722	0.0423	0.0286	0.1018
																														556.8	0.1016	0.1082	0.0658	0.1106	0.1302	0.1135	0.1141	0.1236	0.1045	0.1467	0.1165	0.1437			556.8	0.0718	0.0422	0.0292	0.102
																														557.2	0.1018	0.1083	0.0646	0.11	0.1305	0.1142	0.1141	0.1238	0.1048	0.1474	0.1159	0.1421			557.2	0.072	0.0426	0.0289	0.1027
																														557.6	0.1015	0.1084	0.066	0.1102	0.1311	0.1128	0.1141	0.1229	0.105	0.1473	0.1163	0.1436			557.6	0.0718	0.0432	0.0297	0.102
																														558	0.1014	0.1081	0.0656	0.1106	0.1292	0.1148	0.1135	0.1233	0.103	0.1475	0.1153	0.1423			558	0.0714	0.043	0.0281	0.1025
																														558.4	0.1025	0.1077	0.0666	0.111	0.1295	0.1139	0.1143	0.1235	0.1054	0.147	0.1162	0.1423			558.4	0.0722	0.0436	0.0287	0.1009
																														558.8	0.1019	0.1071	0.0655	0.1108	0.13	0.1132	0.114	0.1234	0.105	0.146	0.1155	0.1431			558.8	0.0713	0.0419	0.0289	0.1011
																														559.2	0.1012	0.1078	0.0655	0.1107	0.1294	0.1134	0.1141	0.1254	0.1047	0.1462	0.1165	0.1436			559.2	0.0718	0.0417	0.0289	0.1018
																														559.6	0.1022	0.1079	0.0662	0.1108	0.1299	0.1134	0.1145	0.1233	0.1051	0.1473	0.1166	0.1398			559.6	0.0712	0.0426	0.0295	0.1018
																														560	0.1017	0.1081	0.0656	0.111	0.1303	0.1145	0.1133	0.1238	0.1042	0.1466	0.1167	0.1432			560	0.0727	0.0441	0.0291	0.1027
																														560.4	0.1013	0.1079	0.066	0.1112	0.1298	0.1147	0.1138	0.1222	0.1047	0.1479	0.1174	0.1424			560.4	0.0727	0.0433	0.029	0.1019
																														560.8	0.1018	0.1086	0.0667	0.1112	0.1291	0.1148	0.1127	0.124	0.105	0.1466	0.1161	0.1424			560.8	0.0717	0.043	0.0295	0.1027
																														561.2	0.1013	0.1078	0.0661	0.1104	0.1306	0.1145	0.1144	0.1238	0.1049	0.147	0.1169	0.1427			561.2	0.0725	0.0429	0.0294	0.1025
																														561.6	0.1023	0.1086	0.0658	0.1103	0.129	0.1146	0.1146	0.125	0.1043	0.1474	0.1159	0.1422			561.6	0.0714	0.0434	0.0291	0.1016
																														562	0.102	0.1082	0.0661	0.11	0.1299	0.1144	0.114	0.1234	0.1055	0.1459	0.116	0.1422			562	0.072	0.0431	0.0283	0.103
																														562.4	0.1019	0.1085	0.0655	0.1098	0.1299	0.1144	0.114	0.1237	0.1056	0.1468	0.1164	0.1427			562.4	0.0722	0.0425	0.0292	0.1024
																														562.8	0.1019	0.1079	0.066	0.1106	0.1298	0.1146	0.1134	0.1229	0.1044	0.1481	0.1168	0.1431			562.8	0.0722	0.0437	0.0299	0.1018
																														563.2	0.1018	0.1084	0.0656	0.1102	0.131	0.114	0.1139	0.1238	0.1048	0.1464	0.117	0.1427			563.2	0.0714	0.0432	0.029	0.1028
																														563.6	0.1021	0.1072	0.0665	0.1102	0.1296	0.1143	0.1141	0.1239	0.1049	0.1467	0.116	0.1427			563.6	0.0729	0.0424	0.0289	0.1015
																														564	0.1024	0.1074	0.0659	0.1103	0.1296	0.1136	0.1139	0.1244	0.1054	0.1465	0.1155	0.1426			564	0.0722	0.0426	0.029	0.1021
																														564.4	0.1014	0.1093	0.0662	0.1101	0.1296	0.1145	0.1142	0.1233	0.1048	0.1475	0.1147	0.1417			564.4	0.0719	0.0432	0.0294	0.1024
																														564.8	0.1024	0.1081	0.0668	0.1106	0.1302	0.1143	0.1137	0.1236	0.1042	0.1473	0.1164	0.143			564.8	0.0728	0.0429	0.03	0.1016
																														565.2	0.1011	0.1089	0.0656	0.1101	0.1307	0.1145	0.1141	0.1226	0.1046	0.1472	0.1163	0.1422			565.2	0.0717	0.043	0.0284	0.1021
																														565.6	0.1018	0.1085	0.0658	0.1106	0.1301	0.1142	0.1134	0.1226	0.1038	0.1472	0.1168	0.1427			565.6	0.0726	0.0428	0.0291	0.1024
																														566	0.1023	0.1078	0.0659	0.1108	0.13	0.115	0.1148	0.1232	0.1047	0.147	0.1166	0.1426			566	0.0724	0.0431	0.0296	0.102
																														566.4	0.1021	0.1078	0.0664	0.1106	0.1299	0.114	0.1138	0.1247	0.1042	0.1467	0.1168	0.1428			566.4	0.0723	0.0435	0.0291	0.1023
																														566.8	0.1021	0.1077	0.0657	0.1099	0.1295	0.1145	0.1146	0.1239	0.1039	0.1462	0.1163	0.1417			566.8	0.0726	0.0427	0.0286	0.1018
																														567.2	0.102	0.1076	0.0671	0.111	0.1296	0.113	0.1141	0.1241	0.1052	0.1472	0.1164	0.1422			567.2	0.0726	0.043	0.0289	0.1021
																														567.6	0.1019	0.109	0.066	0.1096	0.1306	0.1142	0.1142	0.1238	0.1047	0.1473	0.1174	0.1423			567.6	0.0722	0.0427	0.0289	0.1019
																														568	0.1021	0.1085	0.0671	0.1113	0.1308	0.1144	0.1133	0.1239	0.105	0.1469	0.1165	0.1431			568	0.0729	0.0436	0.0289	0.1027
																														568.4	0.1025	0.1072	0.066	0.111	0.13	0.1143	0.114	0.123	0.1043	0.1464	0.1159	0.1419			568.4	0.0717	0.0437	0.0297	0.1024
																														568.8	0.1018	0.1084	0.0666	0.1107	0.1301	0.1141	0.1143	0.1231	0.1052	0.1472	0.1169	0.1424			568.8	0.0723	0.0427	0.0289	0.1024
																														569.2	0.1025	0.1079	0.0662	0.1105	0.1292	0.115	0.1138	0.1232	0.1059	0.1468	0.116	0.1426			569.2	0.0715	0.043	0.0285	0.1023
																														569.6	0.1019	0.1087	0.0666	0.1101	0.1303	0.1146	0.1146	0.1234	0.1044	0.1471	0.1165	0.1419			569.6	0.0726	0.043	0.0289	0.1018
																														570	0.1025	0.1089	0.0668	0.1106	0.13	0.1146	0.1141	0.1236	0.105	0.1476	0.1162	0.1421			570	0.0726	0.0441	0.0294	0.1031
																														570.4	0.1031	0.1084	0.0674	0.1098	0.1295	0.1127	0.1136	0.1231	0.1047	0.1474	0.1154	0.1434			570.4	0.0724	0.0425	0.0295	0.1026
																														570.8	0.1023	0.1079	0.0677	0.1102	0.1299	0.1152	0.1135	0.1222	0.1053	0.1478	0.117	0.1426			570.8	0.0719	0.0443	0.0298	0.1023
																														571.2	0.1023	0.1078	0.0663	0.1102	0.1294	0.1153	0.1138	0.123	0.1059	0.1459	0.1163	0.1425			571.2	0.0723	0.0431	0.0288	0.1025
																														571.6	0.1015	0.1083	0.0667	0.1106	0.1294	0.1147	0.1146	0.1234	0.1052	0.1475	0.117	0.143			571.6	0.0732	0.0429	0.0291	0.1029
																														572	0.1016	0.1089	0.0662	0.1099	0.1303	0.1142	0.1136	0.124	0.1049	0.147	0.1168	0.1421			572	0.0725	0.043	0.03	0.1033
																														572.4	0.1019	0.1083	0.0668	0.1109	0.1301	0.1142	0.1132	0.1239	0.1042	0.1469	0.1168	0.1427			572.4	0.0739	0.0435	0.029	0.1025
																														572.8	0.1031	0.1084	0.067	0.1107	0.1299	0.1151	0.1142	0.1244	0.1038	0.1458	0.1164	0.1423			572.8	0.0726	0.043	0.0289	0.1028
																														573.2	0.1027	0.1077	0.0664	0.111	0.13	0.1147	0.1139	0.1236	0.1046	0.1474	0.1167	0.1425			573.2	0.072	0.0431	0.0293	0.1024
																														573.6	0.1019	0.1075	0.0672	0.1105	0.1298	0.1148	0.1145	0.1235	0.1039	0.1469	0.1169	0.1437			573.6	0.0729	0.0429	0.0297	0.1022
																														574	0.1021	0.1078	0.0673	0.1106	0.13	0.1156	0.1144	0.1227	0.1053	0.1467	0.1163	0.1428			574	0.0728	0.0427	0.0294	0.1025
																														574.4	0.1027	0.1086	0.0666	0.1109	0.1301	0.1148	0.1146	0.1243	0.1055	0.1471	0.1168	0.1423			574.4	0.0735	0.0436	0.0289	0.1022
																														574.8	0.1025	0.1089	0.0674	0.1101	0.1305	0.1147	0.1133	0.1242	0.1051	0.1462	0.1152	0.1422			574.8	0.0724	0.0434	0.0285	0.1023
																														575.2	0.1025	0.109	0.0676	0.1102	0.13	0.1146	0.1146	0.1239	0.104	0.1472	0.1172	0.1429			575.2	0.0732	0.0446	0.0295	0.1018
																														575.6	0.1031	0.1073	0.0664	0.1106	0.1298	0.115	0.1134	0.1246	0.1048	0.1465	0.1162	0.1418			575.6	0.0726	0.0433	0.0299	0.1015
																														576	0.1026	0.1081	0.0678	0.1107	0.1302	0.1156	0.1144	0.1231	0.1047	0.1467	0.1162	0.1427			576	0.0733	0.043	0.0301	0.1025
																														576.4	0.1016	0.1079	0.0665	0.1103	0.1296	0.115	0.1147	0.1233	0.1047	0.1463	0.1169	0.1425			576.4	0.0737	0.0421	0.0294	0.103
																														576.8	0.1019	0.1092	0.067	0.1104	0.1301	0.1148	0.1153	0.1243	0.1045	0.1473	0.1161	0.1425			576.8	0.0735	0.0435	0.0298	0.1021
																														577.2	0.1025	0.1085	0.0666	0.1103	0.1289	0.115	0.1145	0.1245	0.1042	0.147	0.1166	0.1418			577.2	0.0728	0.043	0.0301	0.1024
																														577.6	0.1036	0.109	0.0672	0.1106	0.1308	0.1144	0.1141	0.1244	0.1044	0.1472	0.1169	0.1428			577.6	0.073	0.0438	0.029	0.1015
																														578	0.1035	0.1083	0.0676	0.1105	0.1294	0.1152	0.1143	0.1238	0.1043	0.1479	0.1169	0.1426			578	0.0722	0.0439	0.0291	0.102
																														578.4	0.1025	0.1081	0.0685	0.1113	0.1303	0.1147	0.1148	0.1228	0.1053	0.1465	0.1161	0.1428			578.4	0.0729	0.0437	0.0302	0.1022
																														578.8	0.1028	0.1076	0.0668	0.1105	0.1286	0.1149	0.1142	0.1234	0.1044	0.1475	0.1171	0.1424			578.8	0.0731	0.044	0.0305	0.1027
																														579.2	0.1029	0.109	0.067	0.1109	0.1303	0.1157	0.1138	0.1233	0.105	0.1469	0.1162	0.1421			579.2	0.0735	0.0431	0.0292	0.1024
																														579.6	0.1026	0.1084	0.0668	0.1106	0.1292	0.1148	0.1136	0.1237	0.1051	0.1461	0.1166	0.1425			579.6	0.0726	0.0429	0.0287	0.1027
																														580	0.1031	0.1082	0.0671	0.1103	0.1299	0.1146	0.1129	0.1242	0.1049	0.1474	0.1163	0.1424			580	0.0734	0.0434	0.0294	0.1027
																														580.4	0.1032	0.108	0.0676	0.1108	0.1313	0.1141	0.1147	0.124	0.105	0.147	0.1163	0.1431			580.4	0.0728	0.0436	0.0298	0.1025
																														580.8	0.103	0.108	0.0679	0.1102	0.1295	0.1146	0.1127	0.1226	0.1042	0.1476	0.1163	0.1426			580.8	0.073	0.0431	0.0304	0.1022
																														581.2	0.1035	0.1087	0.067	0.1112	0.1301	0.1149	0.1148	0.1232	0.1048	0.1466	0.1169	0.1423			581.2	0.0725	0.0437	0.0284	0.1027
																														581.6	0.103	0.1078	0.0671	0.1115	0.1302	0.1157	0.1142	0.1227	0.1042	0.1475	0.1169	0.1425			581.6	0.0734	0.0423	0.0293	0.1034
																														582	0.1032	0.1083	0.068	0.1107	0.1303	0.114	0.1134	0.1232	0.1047	0.147	0.1165	0.1432			582	0.0731	0.0431	0.0291	0.1019
																														582.4	0.1039	0.1097	0.0682	0.1101	0.1293	0.115	0.1143	0.1241	0.1048	0.1476	0.1163	0.1423			582.4	0.0727	0.0426	0.0288	0.1031
																														582.8	0.103	0.1084	0.0673	0.1107	0.131	0.1146	0.1142	0.1238	0.1046	0.1471	0.1157	0.1425			582.8	0.0727	0.0429	0.0294	0.1015
																														583.2	0.1035	0.1087	0.0682	0.1109	0.1298	0.1154	0.1146	0.1237	0.1043	0.1473	0.1163	0.1424			583.2	0.0727	0.0439	0.0292	0.1023
																														583.6	0.1031	0.1074	0.0675	0.1105	0.1301	0.1156	0.1133	0.1238	0.1047	0.1472	0.1158	0.1419			583.6	0.0743	0.0432	0.0298	0.1033
																														584	0.1027	0.109	0.0682	0.1106	0.1287	0.1159	0.1139	0.1229	0.1051	0.1469	0.1168	0.1418			584	0.0723	0.0442	0.03	0.103
																														584.4	0.1035	0.1086	0.0678	0.1103	0.1301	0.1141	0.1135	0.1225	0.1037	0.1467	0.1166	0.1424			584.4	0.0732	0.043	0.0298	0.1026
																														584.8	0.1034	0.1091	0.0684	0.1113	0.1293	0.1146	0.1135	0.1223	0.1051	0.1469	0.1165	0.1425			584.8	0.0733	0.0439	0.0291	0.102
																														585.2	0.1027	0.1081	0.0677	0.1114	0.1298	0.1148	0.1144	0.1236	0.1047	0.1474	0.1166	0.1427			585.2	0.073	0.0433	0.0298	0.1027
																														585.6	0.1034	0.1075	0.068	0.1116	0.1309	0.1145	0.114	0.1241	0.1048	0.1473	0.115	0.1427			585.6	0.0726	0.0438	0.03	0.102
																														586	0.1033	0.1083	0.0675	0.1099	0.131	0.1156	0.1141	0.124	0.1048	0.1473	0.1164	0.1416			586	0.0738	0.0437	0.0301	0.1031
																														586.4	0.1032	0.1082	0.0682	0.1108	0.1304	0.1157	0.1132	0.1243	0.1055	0.1476	0.1153	0.1428			586.4	0.0739	0.0434	0.0301	0.1031
																														586.8	0.103	0.1083	0.0681	0.1098	0.1304	0.1156	0.1137	0.123	0.1051	0.1469	0.1168	0.1423			586.8	0.0737	0.0434	0.0293	0.1025
																														587.2	0.1037	0.1089	0.0678	0.1113	0.1296	0.1151	0.1148	0.1232	0.105	0.1468	0.1166	0.1434			587.2	0.0737	0.0431	0.029	0.1023
																														587.6	0.1035	0.1084	0.0685	0.1107	0.1309	0.1145	0.1145	0.1231	0.1049	0.1466	0.1162	0.1423			587.6	0.0729	0.044	0.0294	0.1024
																														588	0.1035	0.1092	0.0684	0.1106	0.1302	0.1148	0.114	0.1238	0.1047	0.1476	0.1156	0.1427			588	0.073	0.0439	0.0299	0.1034
																														588.4	0.1033	0.1082	0.0697	0.1116	0.1307	0.1148	0.1142	0.1243	0.1056	0.1467	0.1158	0.1421			588.4	0.0739	0.0441	0.0298	0.1025
																														588.8	0.1036	0.1078	0.0683	0.1116	0.1304	0.1155	0.1139	0.1228	0.1052	0.1464	0.1163	0.1427			588.8	0.073	0.0441	0.0306	0.1032
																														589.2	0.1033	0.1096	0.0679	0.1101	0.1301	0.1153	0.1138	0.1223	0.1047	0.1466	0.1163	0.1425			589.2	0.0726	0.0431	0.0303	0.1027
																														589.6	0.1033	0.1085	0.0687	0.111	0.129	0.1155	0.1138	0.1231	0.1052	0.1462	0.1165	0.1417			589.6	0.0736	0.0433	0.0293	0.103
																														590	0.1035	0.1089	0.0685	0.1117	0.1298	0.1141	0.1142	0.1238	0.1037	0.1474	0.1162	0.1427			590	0.0741	0.0435	0.0293	0.1025
																														590.4	0.1035	0.1082	0.0679	0.1109	0.1291	0.1156	0.1141	0.1236	0.1039	0.1473	0.1163	0.1416			590.4	0.0738	0.0439	0.0303	0.1031
																														590.8	0.1035	0.1083	0.0692	0.1108	0.1304	0.1151	0.1134	0.1243	0.1044	0.1476	0.1165	0.1434			590.8	0.0744	0.0439	0.0296	0.1033
																														591.2	0.1041	0.1076	0.0684	0.1102	0.1302	0.1156	0.1144	0.1245	0.1061	0.1467	0.1157	0.1422			591.2	0.0736	0.0437	0.03	0.1025
																														591.6	0.1039	0.1081	0.0693	0.1105	0.1303	0.1153	0.1139	0.124	0.1043	0.1469	0.1167	0.1433			591.6	0.0733	0.0439	0.0295	0.1034
																														592	0.1041	0.109	0.0687	0.1109	0.1306	0.1155	0.1138	0.1236	0.105	0.1471	0.1159	0.1414			592	0.0731	0.0438	0.0296	0.1032
																														592.4	0.1024	0.1089	0.0687	0.1112	0.1293	0.1151	0.1139	0.1228	0.105	0.148	0.1171	0.1425			592.4	0.0737	0.0436	0.0289	0.1029
																														592.8	0.1041	0.1091	0.0682	0.11	0.1293	0.1149	0.1135	0.1227	0.105	0.1472	0.117	0.142			592.8	0.0739	0.0446	0.0293	0.1023
																														593.2	0.104	0.1086	0.0687	0.1107	0.1296	0.1159	0.1139	0.123	0.1048	0.147	0.1166	0.1422			593.2	0.0733	0.0432	0.0294	0.1037
																														593.6	0.1042	0.1093	0.0696	0.111	0.1305	0.1153	0.1145	0.1247	0.1044	0.1468	0.1163	0.1422			593.6	0.0737	0.0437	0.0298	0.1024
																														594	0.1044	0.1087	0.0693	0.1105	0.1294	0.1171	0.1142	0.1237	0.105	0.1463	0.1169	0.1422			594	0.0735	0.0437	0.0306	0.1033
																														594.4	0.1035	0.1088	0.0682	0.1113	0.1302	0.1148	0.1136	0.1244	0.1045	0.1474	0.1165	0.1424			594.4	0.0734	0.0437	0.0299	0.1025
																														594.8	0.1028	0.1094	0.0686	0.1111	0.1296	0.1158	0.114	0.123	0.1047	0.1469	0.1169	0.1421			594.8	0.0741	0.0433	0.0299	0.1025
																														595.2	0.1029	0.1083	0.0694	0.1117	0.1296	0.1146	0.1145	0.1231	0.1048	0.1475	0.1178	0.1432			595.2	0.0742	0.0431	0.0294	0.1027
																														595.6	0.1033	0.1086	0.0689	0.111	0.13	0.1155	0.1132	0.1237	0.105	0.147	0.1169	0.1427			595.6	0.075	0.043	0.0295	0.1033
																														596	0.1036	0.1083	0.0687	0.1107	0.1298	0.1154	0.1137	0.1243	0.1047	0.147	0.1167	0.143			596	0.0732	0.0442	0.0307	0.1027
																														596.4	0.1034	0.1091	0.0688	0.1096	0.13	0.1165	0.1146	0.1236	0.1046	0.1469	0.1158	0.1421			596.4	0.0735	0.0433	0.0302	0.1015
																														596.8	0.1042	0.1089	0.0697	0.1105	0.1296	0.1145	0.1145	0.123	0.1045	0.147	0.1156	0.1425			596.8	0.0737	0.0438	0.03	0.1033
																														597.2	0.104	0.1092	0.0682	0.1102	0.13	0.1154	0.1146	0.1242	0.104	0.1466	0.1176	0.1426			597.2	0.0743	0.0427	0.0296	0.1037
																														597.6	0.1031	0.1079	0.0691	0.1106	0.13	0.1155	0.114	0.1234	0.1042	0.1469	0.1161	0.1426			597.6	0.0745	0.0432	0.0302	0.1035
																														598	0.1043	0.1086	0.0694	0.1112	0.1302	0.1143	0.1133	0.1239	0.1048	0.1471	0.1166	0.142			598	0.0738	0.0436	0.029	0.103
																														598.4	0.1041	0.1088	0.0692	0.1113	0.1301	0.1155	0.1139	0.1231	0.1058	0.1473	0.116	0.1427			598.4	0.0737	0.0428	0.0294	0.1031
																														598.8	0.1046	0.1089	0.0692	0.1114	0.1296	0.1155	0.1131	0.1245	0.1055	0.1465	0.1158	0.1423			598.8	0.0739	0.0437	0.0307	0.1027
																														599.2	0.1045	0.1086	0.0689	0.11	0.129	0.1165	0.114	0.1236	0.1052	0.1472	0.116	0.143			599.2	0.0742	0.0445	0.0297	0.1024
																														599.6	0.1043	0.1095	0.0686	0.1107	0.1306	0.1161	0.1145	0.1237	0.1043	0.1461	0.1166	0.1426			599.6	0.0744	0.0436	0.0302	0.1027
																														600	0.1038	0.11	0.0694	0.1103	0.1292	0.1159	0.1136	0.1237	0.104	0.1466	0.1158	0.1426			600	0.0734	0.0433	0.0299	0.1033
[truncated: 21 more columns]
