# Supplementary material for: Autophagosome membrane expansion is mediated by the N-terminus and cis-membrane association of human ATG8s
Source: eLife journal article supplement (doi:10.7554/elife.89185), 2023-06-08
Supplement: fig4-figsupp2-data1 [file Source data for Fig.4-S2.xlsx]

## Sheet: Figure 4-figure supplement 2
Figure 4-Figure supplement 2A			Blank liposomes: 25% DOPE/ 60% POPC/10% Liver-PI/ 5% Ni-NTA																											Figure 4-figure supplement 2B			ER-like liposomes: 25% DOPE/ 60% POPC/10% Liver-PI/ 5% Ni-NTA
			Rh liposomes: 25% DOPE/ 58% POPC/10% Liver-PI/ 2% Rh-PE
	GABARAP V4CNBD-his (n=3)															GABARAP V4CNBD-his Nmut (M1E/K2E/E7A) (n=3)															GABARAP WT-His6 + 1mM ER-like liposomes (n=3)															GABARAP ΔN9-His6 + 1mM ER-like liposomes (n=3)
Wavelength (nm)	+blank liposomes			+blank liposomes+100mM imidazole			+Rh liposomes			+Rh liposomes+100mM imidazole					Wavelength (nm)	+blank liposomes			+blank liposomes+100mM imidazole			+Rh liposomes			+Rh liposomes+100mM imidazole						1μM			2μM			5μM			10μM						1μM			2μM
	R1	R2	R3	R1	R2	R3	R1	R2	R3	R1	R2	R3				R1	R2	R3	R1	R2	R3	R1	R2	R3	R1	R2	R3			Time (sec)	R1	R2	R3	R1	R2	R3	R1	R2	R3	R1	R2	R3			Time (sec)	R1	R2	R3	R1
500	0.249136	0.245815	0.235386	0.0388545	0.0493444	0.0430815	0.269782	0.293066	0.28356	0.0307582	0.0346889	0.031279			500	0.154346	0.15556	0.144163	0.0431514	0.049024	0.0503359	0.218433	0.22847	0.216802	0.0178003	0.0286186	0.0437464			0	0	0	0	0	0	0	0	0	0	0	0	0			0	0	0	0	0
500.2	0.246011	0.241326	0.232306	0.0407716	0.0507164	0.0448523	0.26273	0.285253	0.275818	0.0327972	0.0374814	0.0339035			500.2	0.151641	0.151705	0.141786	0.0455416	0.0508928	0.0520841	0.210815	0.22035	0.208571	0.0215594	0.0315137	0.0459555			0.4	0.0005	-0.0004	-0.0002	0.0004	-0.0008	0.0009	0.0018	-0.0007	0.001	0.0028	0.0016	0.0008			0.4	0.0012	-0.0002	-0.0003	0.0009
500.4	0.240676	0.2333	0.22689	0.0446795	0.0538497	0.0483345	0.249538	0.270772	0.261906	0.0372391	0.0423297	0.0390167			500.4	0.146517	0.144926	0.137078	0.0500259	0.0544706	0.0554297	0.19633	0.20499	0.194264	0.0289079	0.0368007	0.0504356			0.8	0.001	-0.0006	-0.0016	-0.0002	-0.0012	-0.0006	0.0014	0.0008	-0.0004	0.0039	0.002	0.0008			0.8	0.0009	-0.0005	-0.0013	0.0007
500.6	0.238635	0.229771	0.224509	0.0468695	0.0553323	0.0502811	0.243363	0.264658	0.255828	0.0397192	0.044869	0.0418911			500.6	0.144261	0.142308	0.134802	0.0523958	0.056049	0.0571469	0.190054	0.198601	0.187728	0.0323564	0.0394741	0.0527776			1.2	0	-0.0007	0.0001	-0.0003	-0.0007	0.0012	0.0015	0.001	0.0023	0.0055	0.0031	0.003			1.2	0.0004	-0.0014	-0.0002	0.0006
500.8	0.235601	0.223983	0.22137	0.0510521	0.0578738	0.0538693	0.233398	0.253709	0.245449	0.0440701	0.0490543	0.0474555			500.8	0.140674	0.13824	0.132137	0.0568617	0.0593387	0.0602622	0.178849	0.187264	0.176422	0.0386037	0.0448542	0.0575391			1.6	0.001	-0.0007	0.0079	0.0003	-0.0002	0.0093	0.0019	0.0024	0.0109	0.0067	0.0061	0.0111			1.6	0.0008	-0.0322	0.0072	0.0007
501	0.23399	0.220852	0.219752	0.0539894	0.0602112	0.0570057	0.226717	0.246588	0.238483	0.0471094	0.0528321	0.0516834			501	0.139063	0.135363	0.130759	0.0603129	0.0624029	0.0632881	0.171338	0.179479	0.168871	0.0434088	0.0490927	0.061206			2	0.0014	-0.0004	0.0078	-0.0022	-0.0006	0.0108	0.0037	0.003	0.0123	0.0096	0.007	0.0136			2	0.0012	-0.0317	0.0084	0.0011
501.2	0.232847	0.218988	0.218799	0.0563041	0.0619919	0.0593874	0.22211	0.241419	0.233865	0.049487	0.0559089	0.0550686			501.2	0.137825	0.133479	0.12991	0.0629677	0.0648912	0.0655446	0.166151	0.173876	0.163471	0.0472761	0.0522816	0.064098			2.4	0.0016	-0.0017	0.0071	-0.0009	-0.0015	0.01	0.0046	0.0018	0.0114	0.0115	0.0078	0.013			2.4	0.0007	-0.0324	0.0077	0.0016
501.4	0.232264	0.217419	0.218243	0.0592687	0.0645402	0.0619457	0.217893	0.236104	0.22916	0.0526044	0.0595141	0.0589163			501.4	0.136956	0.131751	0.129116	0.0661167	0.0679125	0.0680124	0.160786	0.16799	0.157823	0.0518164	0.0558284	0.0673051			2.8	0.0015	-0.0002	0.0085	-0.0008	0.0001	0.0109	0.0068	0.0037	0.0122	0.014	0.0098	0.0142			2.8	0.0019	-0.0308	0.0081	0.0014
501.6	0.232134	0.216404	0.218065	0.0615829	0.0664896	0.0639402	0.214933	0.232346	0.225929	0.0550701	0.0622728	0.0618093			501.6	0.13649	0.130687	0.128586	0.0685707	0.0702372	0.0700189	0.156913	0.163755	0.153802	0.0553252	0.0586998	0.0698793			3.2	0.0021	-0.0012	0.0083	-0.0015	-0.0002	0.0102	0.0076	0.0043	0.0133	0.0155	0.0114	0.0153			3.2	0.0014	-0.0327	0.0073	0.0022
501.8	0.233227	0.216382	0.218915	0.0641814	0.0689654	0.0666713	0.212618	0.229422	0.223267	0.0579281	0.065205	0.0652083			501.8	0.136591	0.130176	0.128669	0.0715232	0.0729351	0.0728444	0.153384	0.159948	0.150163	0.0590746	0.062003	0.0728432			3.6	0.0006	-0.0015	0.0067	-0.001	0	0.0099	0.0073	0.0053	0.0133	0.0173	0.014	0.0157			3.6	-0.0005	-0.0323	0.0061	0.0007
502	0.234286	0.216811	0.219678	0.0663844	0.0709047	0.0688874	0.211119	0.227613	0.221771	0.0601503	0.0676004	0.067808			502	0.136913	0.130301	0.12888	0.0738979	0.0751066	0.0750583	0.151103	0.157306	0.147647	0.0620992	0.0646394	0.0751646			4	0.0024	-0.001	0.0076	0.0001	-0.0013	0.0108	0.0093	0.0057	0.014	0.0199	0.0148	0.0173			4	0.0008	-0.0324	0.0074	0.0026
502.2	0.236492	0.217747	0.221648	0.0690934	0.073258	0.0715048	0.210403	0.226697	0.221086	0.0628677	0.0706929	0.0709628			502.2	0.138029	0.130677	0.129926	0.0768506	0.0776366	0.0777191	0.149308	0.155316	0.145685	0.0657974	0.0679695	0.0780563			4.4	0.0021	-0.0007	0.0075	0.0009	-0.0003	0.0114	0.011	0.0066	0.0142	0.0211	0.0164	0.0176			4.4	0.0007	-0.0313	0.0074	0.0022
502.4	0.238409	0.218786	0.223415	0.0712135	0.0752562	0.0736164	0.210137	0.226412	0.220919	0.0649812	0.0730621	0.0735245			502.4	0.139057	0.131115	0.130926	0.0793189	0.0796909	0.079748	0.148218	0.154183	0.14447	0.0687025	0.0704979	0.0803702			4.8	0.0028	-0.0008	0.0084	0.0018	0.0008	0.0121	0.0121	0.007	0.0159	0.0244	0.0178	0.0192			4.8	0.0026	-0.0317	0.0089	0.0036
502.6	0.241414	0.22077	0.226236	0.0738649	0.0776995	0.0761455	0.210844	0.226793	0.221517	0.0675088	0.076152	0.0765367			502.6	0.140702	0.132411	0.132496	0.0822019	0.0823883	0.0822615	0.147641	0.153769	0.143794	0.0719565	0.0735338	0.0832707			5.2	0.0022	-0.0016	0.0073	0.0009	0.0001	0.0101	0.0137	0.0072	0.0144	0.026	0.0199	0.0193			5.2	0.0013	-0.0324	0.0062	0.0024
502.8	0.244001	0.222642	0.228793	0.0759519	0.0796557	0.0782698	0.211688	0.227371	0.222365	0.0695527	0.0785097	0.0789072			502.8	0.142141	0.133537	0.133962	0.0845523	0.0845678	0.0843302	0.147567	0.153667	0.143536	0.0744642	0.0759884	0.0856235			5.6	0.0019	-0.0013	0.0079	0.002	-0.0002	0.0117	0.0135	0.0101	0.0159	0.0276	0.0227	0.0212			5.6	0.0002	-0.0309	0.0069	0.0024
503	0.247667	0.225406	0.232411	0.078422	0.0819935	0.0808118	0.213494	0.22923	0.224352	0.0721442	0.0813726	0.0817402			503	0.144315	0.135279	0.136086	0.0873716	0.0872064	0.0870518	0.148428	0.154401	0.144085	0.0774939	0.0788702	0.0886038			6	0.0024	-0.0008	0.0076	0.001	0.001	0.0118	0.0154	0.0086	0.0167	0.0284	0.0244	0.0217			6	0.0001	-0.0316	0.0071	0.0021
503.2	0.250797	0.227765	0.235393	0.0805385	0.0838453	0.0829656	0.215173	0.231131	0.226162	0.0742205	0.0836877	0.0840507			503.2	0.146135	0.136747	0.137927	0.089693	0.0893341	0.0892573	0.149362	0.155319	0.144793	0.0799346	0.0811801	0.0909421			6.4	0.0019	-0.0017	0.0073	0.0018	0.0003	0.0117	0.0154	0.0096	0.0176	0.0309	0.0257	0.0217			6.4	0	-0.0313	0.0067	0.003
503.4	0.255129	0.231359	0.239389	0.083202	0.0863073	0.0854396	0.21788	0.233937	0.229071	0.0767627	0.0865948	0.0869067			503.4	0.148823	0.139091	0.140348	0.0925479	0.0920876	0.0919954	0.151126	0.156986	0.146416	0.0829025	0.0841067	0.0938034			6.8	0.0015	-0.0013	0.0091	0.0017	0.0009	0.0132	0.0168	0.0106	0.0198	0.0323	0.0274	0.0243			6.8	-0.0006	-0.0322	0.0085	0.0024
503.6	0.258809	0.234392	0.24275	0.0853903	0.0883221	0.0874663	0.220232	0.236344	0.231519	0.0788058	0.0889713	0.0892066			503.6	0.151152	0.141101	0.142419	0.0949453	0.0943578	0.0942075	0.152604	0.158517	0.147868	0.0852557	0.0864999	0.0960977			7.2	0.002	-0.0005	0.0088	0.0023	0.001	0.0124	0.018	0.0116	0.0195	0.0347	0.0288	0.0245			7.2	0.0006	-0.0323	0.0085	0.0032
503.8	0.263672	0.238547	0.247315	0.0879727	0.0909901	0.0900377	0.223594	0.239921	0.235057	0.0813415	0.091872	0.0921479			503.8	0.15421	0.14386	0.145415	0.0977323	0.097099	0.0969514	0.15495	0.160983	0.15004	0.0882256	0.0894046	0.0989888			7.6	0.0036	-0.0008	0.0077	0.0027	0.0014	0.0124	0.0202	0.0131	0.0185	0.0371	0.0315	0.025			7.6	0.0002	-0.0317	0.007	0.004
504	0.267608	0.24197	0.251099	0.0900874	0.0931513	0.0920481	0.226508	0.242851	0.238134	0.0834226	0.0941954	0.0943976			504	0.156798	0.146174	0.147919	0.100085	0.0993147	0.0991454	0.156895	0.163138	0.151868	0.0905321	0.0916801	0.101312			8	0.0029	-0.0008	0.0087	0.0036	0.0017	0.0131	0.0209	0.0134	0.0189	0.0383	0.0332	0.0255			8	0.0006	-0.0314	0.0076	0.0039
504.2	0.273072	0.246598	0.256176	0.0928251	0.0958886	0.0947553	0.230517	0.246979	0.2424	0.0859826	0.0971594	0.0973325			504.2	0.160357	0.149262	0.151246	0.103034	0.102238	0.101927	0.159796	0.166152	0.154546	0.0934541	0.09454	0.10421			8.4	0.0024	-2.776e-17	0.0076	0.0035	0.0014	0.0126	0.0216	0.0143	0.0199	0.039	0.0364	0.027			8.4	0.0009	-0.0302	0.0073	0.0033
504.4	0.277434	0.250365	0.2603	0.0949977	0.0981104	0.0970338	0.233816	0.250436	0.245932	0.0880691	0.0995552	0.0996981			504.4	0.163207	0.15179	0.153957	0.105334	0.10461	0.104219	0.162293	0.1687	0.156837	0.0957545	0.0968716	0.106526			8.8	0.0037	-0.0005	0.0083	0.0037	0.0019	0.0132	0.0233	0.0149	0.0207	0.0426	0.0371	0.0276			8.8	0.0006	-0.0306	0.0077	0.0037
504.6	0.283251	0.255389	0.26581	0.0977918	0.100904	0.0998466	0.238248	0.255281	0.250609	0.0907882	0.102582	0.102658			504.6	0.167177	0.155192	0.157503	0.108281	0.107638	0.107025	0.165764	0.172191	0.160104	0.098781	0.0998596	0.109626			9.2	0.005	-0.0002	0.0083	0.0053	0.0024	0.0153	0.0247	0.0154	0.0225	0.0442	0.0399	0.0292			9.2	0.0004	-0.031	0.0087	0.0051
504.8	0.288033	0.259544	0.270218	0.100077	0.103116	0.102117	0.241937	0.259239	0.254497	0.0930131	0.104963	0.105042			504.8	0.170362	0.15805	0.160448	0.110625	0.110048	0.109366	0.168701	0.175081	0.162895	0.101122	0.102235	0.11211			9.6	0.0032	-0.0017	0.0086	0.0044	0.0022	0.0137	0.0248	0.0166	0.0222	0.0462	0.0416	0.0293			9.6	0.0002	-0.0312	0.0067	0.004
505	0.294159	0.265059	0.275953	0.102975	0.106062	0.105104	0.246736	0.264435	0.259653	0.0957485	0.108056	0.108171			505	0.174432	0.161828	0.164275	0.113747	0.113211	0.112519	0.172545	0.179051	0.166643	0.10422	0.105189	0.115185			10	0.0047	-0.0005	0.0088	0.0063	0.0033	0.0144	0.0261	0.0187	0.0231	0.0483	0.0438	0.0309			10	0.0007	-0.0315	0.0078	0.0049
505.2	0.299043	0.269413	0.280563	0.105346	0.108457	0.10754	0.250668	0.26872	0.263892	0.0979794	0.110598	0.110691			505.2	0.177822	0.164874	0.167342	0.116302	0.115686	0.115016	0.175711	0.182263	0.169606	0.106744	0.107588	0.11773			10.4	0.0044	-0.0002	0.0087	0.0056	0.0033	0.0146	0.0279	0.018	0.0229	0.0514	0.047	0.0314			10.4	0.001	-0.0313	0.0073	0.0044
505.4	0.305491	0.27506	0.28664	0.108351	0.111468	0.110602	0.25582	0.274324	0.269413	0.100859	0.113733	0.113924			505.4	0.182082	0.168712	0.171422	0.11946	0.118902	0.11826	0.179882	0.186472	0.173568	0.109779	0.110619	0.121107			10.8	0.005	-0.0008	0.0088	0.0067	0.0039	0.0143	0.0302	0.0183	0.0228	0.0531	0.0477	0.0322			10.8	0.0022	-0.0316	0.0065	0.0056
505.6	0.310601	0.279726	0.291565	0.110777	0.113819	0.113086	0.260022	0.278776	0.273854	0.103193	0.116289	0.116511			505.6	0.185655	0.171828	0.174793	0.122068	0.121491	0.120786	0.183276	0.189871	0.176773	0.112305	0.11304	0.123743			11.2	0.0049	-0.0009	0.0082	0.0073	0.004	0.0145	0.0288	0.0201	0.0241	0.0555	0.0497	0.0329			11.2	0.0009	-0.032	0.0075	0.0056
505.8	0.317191	0.285728	0.297891	0.113921	0.116871	0.11609	0.26554	0.284553	0.279631	0.106154	0.119516	0.119801			505.8	0.190169	0.175944	0.178966	0.125321	0.124795	0.124032	0.187747	0.194247	0.180982	0.115452	0.116284	0.127047			11.6	0.0065	-0.0015	0.0089	0.009	0.0041	0.0161	0.0331	0.0197	0.025	0.0584	0.0507	0.0345			11.6	0.0026	-0.0319	0.0079	0.008
506	0.322581	0.29063	0.30295	0.116466	0.119336	0.118552	0.270072	0.289316	0.284283	0.108502	0.122165	0.122529			506	0.193856	0.179288	0.18245	0.127988	0.127521	0.12669	0.191395	0.197847	0.184438	0.118011	0.118856	0.129798			12	0.0049	0.0007	0.0079	0.0095	0.005	0.0153	0.0318	0.0226	0.0255	0.0596	0.0553	0.0354			12	0.0006	-0.0311	0.0083	0.006
506.2	0.329498	0.296684	0.309301	0.119623	0.122575	0.1216	0.275832	0.295392	0.290314	0.111505	0.125553	0.125851			506.2	0.198643	0.183636	0.18685	0.131341	0.130957	0.130051	0.196121	0.202645	0.188901	0.12128	0.122061	0.133114			12.4	0.0049	-0.0005	0.0091	0.0078	0.0045	0.0161	0.0336	0.0229	0.0259	0.0606	0.0574	0.0365			12.4	0.0012	-0.0306	0.0072	0.0069
506.4	0.33501	0.301612	0.314471	0.122206	0.125074	0.124133	0.280491	0.300284	0.295226	0.113961	0.128195	0.128603			506.4	0.202518	0.187144	0.190512	0.134077	0.133733	0.132762	0.199913	0.206593	0.192544	0.123913	0.124642	0.135898			12.8	0.0054	0.0003	0.0089	0.0093	0.0045	0.016	0.0341	0.024	0.0268	0.0626	0.0592	0.0372			12.8	0.0009	-0.0313	0.008	0.0077
506.6	0.342165	0.308051	0.321124	0.125441	0.128347	0.127439	0.286386	0.306497	0.30151	0.117083	0.131603	0.132051			506.6	0.20759	0.191658	0.195019	0.137572	0.137152	0.136212	0.204755	0.211509	0.197256	0.127373	0.127957	0.139426			13.2	0.0062	-2.776e-17	0.0077	0.0102	0.0046	0.0158	0.037	0.0243	0.0261	0.0664	0.0605	0.0375			13.2	0.0025	-0.0312	0.0076	0.0075
506.8	0.348064	0.313324	0.326604	0.128052	0.130952	0.130141	0.29107	0.311595	0.306682	0.119668	0.134379	0.134782			506.8	0.211662	0.195383	0.198657	0.140421	0.139952	0.139015	0.208701	0.215529	0.201028	0.130114	0.130621	0.142257			13.6	0.0076	0.0004	0.0075	0.0109	0.0072	0.016	0.0382	0.0249	0.0266	0.0687	0.0638	0.0391			13.6	0.0013	-0.0298	0.007	0.0081
507	0.355473	0.319997	0.333556	0.131418	0.13433	0.133462	0.297337	0.318303	0.313083	0.122901	0.137935	0.138348			507	0.216859	0.20015	0.203448	0.143991	0.143528	0.14254	0.21389	0.220763	0.205757	0.133558	0.134074	0.145977			14	0.0066	-0.0003	0.0091	0.0111	0.0058	0.0171	0.0385	0.0268	0.0284	0.0702	0.0641	0.0393			14	0.0018	-0.032	0.0084	0.0079
507.2	0.361476	0.325363	0.339179	0.134219	0.137022	0.136156	0.302389	0.323579	0.318279	0.125496	0.140889	0.141189			507.2	0.221044	0.204076	0.207355	0.146965	0.146463	0.145392	0.218095	0.225067	0.209653	0.136318	0.136891	0.148965			14.4	0.0075	0.0008	0.0086	0.0113	0.0067	0.018	0.0398	0.0272	0.0294	0.0717	0.0676	0.0414			14.4	0.0018	-0.0311	0.0086	0.0082
507.4	0.369193	0.332156	0.346422	0.137851	0.14057	0.139713	0.308834	0.330385	0.325028	0.128733	0.144676	0.144941			507.4	0.226439	0.20891	0.212363	0.150787	0.150312	0.149101	0.223325	0.230489	0.214774	0.140011	0.140596	0.152708			14.8	0.0074	0.0015	0.0095	0.0126	0.0067	0.0175	0.0412	0.0284	0.03	0.074	0.0696	0.0436			14.8	0.0015	-0.0308	0.0098	0.0089
507.6	0.375196	0.33765	0.352168	0.140745	0.143478	0.142633	0.313925	0.335838	0.330386	0.131375	0.147722	0.148037			507.6	0.230797	0.21288	0.216346	0.153918	0.153367	0.152142	0.227583	0.234794	0.218894	0.142998	0.143544	0.155792			15.2	0.0083	0.0016	0.0098	0.0135	0.0073	0.0179	0.0429	0.0291	0.03	0.0769	0.0712	0.0435			15.2	0.0022	-0.029	0.0094	0.01
507.8	0.381482	0.343232	0.357986	0.14366	0.146287	0.145475	0.319222	0.341389	0.335817	0.134083	0.150761	0.151029			507.8	0.235239	0.216973	0.220448	0.157124	0.156463	0.155184	0.231882	0.239233	0.223031	0.145942	0.14651	0.158945			15.6	0.0081	0.0015	0.0088	0.0144	0.0086	0.0184	0.0444	0.0299	0.03	0.0769	0.0743	0.0443			15.6	0.0016	-0.0299	0.0087	0.0096
508	0.389257	0.35018	0.365301	0.147336	0.149869	0.149125	0.325865	0.348324	0.342759	0.137568	0.154585	0.154863			508	0.240796	0.222107	0.225644	0.161111	0.160325	0.159105	0.237268	0.24485	0.228311	0.149553	0.150226	0.162896			16	0.0092	0.0008	0.0091	0.0146	0.007	0.0187	0.0457	0.0306	0.0308	0.0797	0.0751	0.0448			16	0.0022	-0.0296	0.0091	0.0103
508.2	0.395433	0.355949	0.371166	0.150393	0.152935	0.152152	0.331174	0.353934	0.348286	0.140323	0.157839	0.157996			508.2	0.245187	0.22625	0.2298	0.164358	0.163426	0.16226	0.241731	0.249545	0.232529	0.152528	0.153207	0.166128			16.4	0.0088	0.0003	0.0093	0.0147	0.0074	0.0192	0.047	0.0319	0.0312	0.0824	0.0777	0.0454			16.4	0.0029	-0.0307	0.0086	0.0103
508.4	0.403291	0.363115	0.378614	0.154278	0.156735	0.155866	0.337951	0.361079	0.355235	0.143852	0.161912	0.1619			508.4	0.250878	0.231422	0.235039	0.168431	0.167297	0.166302	0.247431	0.25538	0.237859	0.156324	0.156957	0.170107			16.8	0.0086	0.0017	0.0087	0.0149	0.0083	0.0189	0.048	0.0332	0.0316	0.083	0.0806	0.0473			16.8	0.0026	-0.03	0.0089	0.0099
508.6	0.412988	0.371834	0.387781	0.158854	0.161312	0.160281	0.346274	0.369828	0.363743	0.14824	0.166805	0.166779			508.6	0.257768	0.237771	0.241446	0.173464	0.17218	0.171198	0.254408	0.262465	0.244572	0.160976	0.161572	0.175128			17.2	0.0082	0.0019	0.0087	0.0155	0.0087	0.0186	0.05	0.0335	0.0323	0.0855	0.0821	0.0497			17.2	0.002	-0.0299	0.0099	0.0104
508.8	0.41783	0.376262	0.392355	0.16119	0.163648	0.162607	0.350273	0.374277	0.368031	0.150453	0.169345	0.169303			508.8	0.261421	0.241057	0.244776	0.176053	0.174739	0.173558	0.25794	0.266049	0.247912	0.163387	0.163881	0.177607			17.6	0.0094	0.0019	0.0102	0.0163	0.0092	0.0193	0.0508	0.0348	0.033	0.0873	0.083	0.0495			17.6	0.0028	-0.0298	0.0099	0.0118
509	0.427722	0.385013	0.401755	0.165917	0.168448	0.167312	0.358568	0.383058	0.376683	0.154806	0.174392	0.174261			509	0.268545	0.247752	0.251264	0.181129	0.179659	0.178594	0.265117	0.273398	0.254689	0.167996	0.168727	0.182683			18	0.01	0.0011	0.0107	0.0169	0.0101	0.02	0.0525	0.0359	0.0335	0.0885	0.0851	0.0514			18	0.0023	-0.0299	0.0091	0.011
509.2	0.432681	0.389506	0.406507	0.168299	0.170832	0.16972	0.362784	0.387533	0.38097	0.157101	0.17699	0.176778			509.2	0.272195	0.251138	0.254627	0.183759	0.182221	0.181104	0.268705	0.277168	0.257992	0.170396	0.170999	0.185342			18.4	0.0106	0.0018	0.0097	0.0169	0.0103	0.0209	0.0536	0.0375	0.0343	0.0898	0.0877	0.052			18.4	0.0024	-0.0304	0.0091	0.0113
509.4	0.442744	0.398517	0.416095	0.173207	0.175706	0.17456	0.37123	0.396534	0.389713	0.161707	0.182019	0.181761			509.4	0.279405	0.257873	0.261392	0.189	0.187293	0.18613	0.275966	0.284538	0.264897	0.175414	0.175932	0.190665			18.8	0.0094	0.0028	0.0097	0.0172	0.0109	0.0207	0.0541	0.0379	0.0355	0.091	0.0899	0.0531			18.8	0.0022	-0.029	0.0103	0.0112
509.6	0.447776	0.403103	0.420979	0.17567	0.178216	0.177128	0.375538	0.40114	0.394173	0.16405	0.184567	0.184348			509.6	0.283158	0.26138	0.264875	0.191632	0.189942	0.18876	0.279676	0.288371	0.268297	0.177807	0.178401	0.193418			19.2	0.0105	0.0022	0.0108	0.018	0.0116	0.0215	0.0567	0.0383	0.0357	0.0928	0.0917	0.0557			19.2	0.0034	-0.0303	0.01	0.0125
509.8	0.457987	0.412434	0.430655	0.180772	0.183384	0.182161	0.38426	0.410451	0.403244	0.168761	0.190008	0.189581			509.8	0.290768	0.268158	0.271945	0.196973	0.195065	0.194125	0.28711	0.29601	0.275371	0.182888	0.183362	0.19872			19.6	0.0108	0.0019	0.0107	0.0191	0.0112	0.0209	0.0586	0.0384	0.0353	0.0953	0.0918	0.056			19.6	0.0024	-0.03	0.0107	0.0131
510	0.463222	0.417121	0.435611	0.183273	0.185915	0.18465	0.388658	0.415051	0.407731	0.171212	0.192656	0.192266			510	0.294648	0.271598	0.275532	0.199633	0.197808	0.196785	0.290853	0.299806	0.278881	0.185411	0.185905	0.201423			20	0.0109	0.0015	0.0106	0.0193	0.0105	0.0217	0.0587	0.0397	0.0362	0.0962	0.0932	0.0562			20	0.0027	-0.0306	0.0101	0.0131
510.2	0.473393	0.426392	0.445403	0.188397	0.191114	0.189708	0.397514	0.424268	0.416712	0.175933	0.197998	0.197762			510.2	0.302224	0.278579	0.282775	0.2051	0.203117	0.202317	0.298422	0.307615	0.286208	0.190566	0.191118	0.206913			20.4	0.0114	0.0032	0.0112	0.0193	0.0123	0.0214	0.061	0.0416	0.0373	0.098	0.0952	0.0578			20.4	0.0032	-0.0297	0.0109	0.0125
510.4	0.478621	0.43114	0.45035	0.191052	0.193669	0.192246	0.401874	0.428879	0.421491	0.178414	0.200775	0.200552			510.4	0.306059	0.282175	0.28654	0.207951	0.20584	0.205122	0.302181	0.31157	0.290002	0.193118	0.193762	0.2098			20.8	0.0121	0.0024	0.0096	0.0201	0.0122	0.0222	0.0627	0.0423	0.0373	0.0997	0.0973	0.0588			20.8	0.0039	-0.0295	0.0095	0.0136
510.6	0.488949	0.440627	0.460292	0.196366	0.198935	0.197472	0.410719	0.438278	0.430812	0.183417	0.206233	0.206001			510.6	0.313811	0.289217	0.293754	0.213461	0.211426	0.21063	0.309701	0.319523	0.297282	0.198403	0.199026	0.215383			21.2	0.0114	0.0028	0.0099	0.0213	0.0133	0.0209	0.0627	0.0433	0.0372	0.1002	0.0984	0.0597			21.2	0.0027	-0.0297	0.0099	0.0131
510.8	0.494007	0.445374	0.465189	0.198947	0.201544	0.20017	0.415096	0.442951	0.435485	0.18591	0.209034	0.208709			510.8	0.317692	0.2928	0.29731	0.216309	0.214111	0.21349	0.313601	0.323464	0.300985	0.200952	0.201528	0.218244			21.6	0.0134	0.0032	0.0097	0.0223	0.0132	0.0229	0.065	0.0443	0.0384	0.1019	0.0997	0.0613			21.6	0.0039	-0.03	0.0105	0.0144
511	0.50465	0.455132	0.475369	0.204089	0.206782	0.205506	0.424136	0.452314	0.444801	0.190972	0.214581	0.214193			511	0.325544	0.30001	0.304675	0.221844	0.21973	0.219121	0.321456	0.331648	0.308558	0.206199	0.206807	0.223892			22	0.0135	0.0028	0.0107	0.0226	0.0126	0.0238	0.066	0.0447	0.0397	0.1023	0.0997	0.0632			22	0.0038	-0.0306	0.0119	0.015
511.2	0.509847	0.460122	0.480519	0.206868	0.209413	0.208273	0.428618	0.457157	0.449557	0.193555	0.217401	0.21705			511.2	0.3294	0.303568	0.308338	0.224737	0.222524	0.221983	0.325366	0.335753	0.312383	0.208925	0.209419	0.226845			22.4	0.0132	0.0016	0.0107	0.0225	0.013	0.0226	0.0675	0.0456	0.0399	0.1032	0.102	0.0638			22.4	0.0033	-0.0293	0.0098	0.0148
511.4	0.52063	0.469714	0.490659	0.212397	0.215019	0.213616	0.437635	0.46672	0.459106	0.198757	0.223214	0.222817			511.4	0.337377	0.31082	0.315652	0.230394	0.228266	0.227638	0.333368	0.343737	0.320003	0.214346	0.214763	0.232652			22.8	0.0124	0.0021	0.0105	0.023	0.0134	0.0235	0.0692	0.0464	0.0401	0.104	0.1023	0.0644			22.8	0.0037	-0.0309	0.0108	0.0154
511.6	0.526045	0.474485	0.495839	0.215087	0.217749	0.216329	0.44222	0.471557	0.463804	0.201337	0.226027	0.225647			511.6	0.341422	0.314505	0.319458	0.233275	0.231161	0.230565	0.337356	0.347814	0.323796	0.217095	0.217591	0.235543			23.2	0.0142	0.003	0.0108	0.0245	0.0157	0.0226	0.0702	0.048	0.0402	0.1052	0.1046	0.0655			23.2	0.0049	-0.0292	0.01	0.0143
511.8	0.53684	0.484078	0.506012	0.220553	0.223185	0.221885	0.4514	0.481237	0.473116	0.20652	0.231772	0.231598			511.8	0.349518	0.322088	0.326926	0.239166	0.237004	0.236274	0.34525	0.355929	0.331574	0.222707	0.222959	0.241616			23.6	0.0132	0.0026	0.0114	0.0239	0.0152	0.0251	0.0713	0.0487	0.0413	0.1072	0.1056	0.0679			23.6	0.0039	-0.0291	0.0106	0.0156
512	0.542215	0.488954	0.511112	0.223282	0.225887	0.224742	0.455856	0.485982	0.477669	0.20914	0.234732	0.23438			512	0.353715	0.325786	0.330721	0.241967	0.239913	0.239196	0.349144	0.360006	0.335288	0.225488	0.225721	0.244561			24	0.0141	0.0033	0.0108	0.0255	0.014	0.0239	0.0727	0.0486	0.0422	0.1083	0.1053	0.0675			24	0.0052	-0.0302	0.0113	0.0159
512.2	0.553208	0.498661	0.521487	0.228764	0.231496	0.230361	0.465112	0.495513	0.48725	0.214268	0.240377	0.240066			512.2	0.361606	0.333173	0.338547	0.247794	0.245666	0.245203	0.357042	0.368393	0.342997	0.231108	0.231418	0.250619			24.4	0.014	0.0018	0.0112	0.0254	0.0145	0.0255	0.0746	0.0513	0.0428	0.1101	0.1063	0.0698			24.4	0.0053	-0.0309	0.011	0.0163
512.4	0.558514	0.503595	0.526414	0.231571	0.234365	0.233153	0.46965	0.500539	0.49207	0.216943	0.24333	0.243018			512.4	0.365709	0.336858	0.342482	0.250785	0.248623	0.248118	0.360994	0.372592	0.346902	0.233944	0.234139	0.253598			24.8	0.0153	0.0022	0.0106	0.026	0.0162	0.0232	0.0762	0.052	0.0421	0.1099	0.1075	0.0697			24.8	0.0048	-0.0299	0.01	0.0159
512.6	0.569762	0.513554	0.536625	0.237334	0.239914	0.238882	0.478916	0.510325	0.501894	0.222351	0.249223	0.248937			512.6	0.374153	0.344452	0.350325	0.256715	0.254689	0.254206	0.3692	0.380951	0.354908	0.239719	0.239899	0.259558			25.2	0.0135	0.0028	0.011	0.026	0.0166	0.0246	0.077	0.0533	0.0435	0.1091	0.1079	0.0712			25.2	0.0036	-0.0294	0.0111	0.0161
512.8	0.575337	0.518542	0.541809	0.240187	0.242718	0.241795	0.483452	0.515408	0.506715	0.224984	0.25225	0.251924			512.8	0.378357	0.348415	0.354051	0.259779	0.257744	0.257371	0.373374	0.385277	0.358777	0.242542	0.242731	0.262484			25.6	0.0153	0.0042	0.0116	0.0268	0.0169	0.0248	0.0805	0.0556	0.0437	0.1126	0.1102	0.0731			25.6	0.0047	-0.0301	0.0119	0.0166
513	0.586283	0.528262	0.552085	0.245905	0.248418	0.247528	0.492777	0.525099	0.516481	0.230412	0.258508	0.257975			513	0.386649	0.355957	0.361711	0.265869	0.263809	0.263339	0.381496	0.393805	0.36673	0.248207	0.24846	0.268628			26	0.0136	0.0033	0.0112	0.0261	0.0166	0.0259	0.0802	0.0543	0.0435	0.1095	0.1089	0.0734			26	0.004	-0.0295	0.0112	0.0153
513.2	0.591958	0.533172	0.557392	0.248753	0.251274	0.250433	0.497394	0.52999	0.521225	0.233247	0.26157	0.261012			513.2	0.390882	0.359839	0.365505	0.268919	0.266803	0.266371	0.38562	0.398064	0.370735	0.251153	0.251415	0.271767			26.4	0.0149	0.0029	0.0116	0.0262	0.0172	0.0263	0.0811	0.056	0.0441	0.1122	0.1106	0.0751			26.4	0.0047	-0.0303	0.0112	0.0163
513.4	0.602703	0.543135	0.567824	0.254466	0.257057	0.256174	0.506547	0.53963	0.53089	0.238596	0.267665	0.267			513.4	0.39918	0.367561	0.37334	0.275069	0.272879	0.272247	0.393849	0.406741	0.378641	0.256852	0.257202	0.277998			26.8	0.0155	0.0028	0.0112	0.0277	0.0179	0.0244	0.0832	0.058	0.0451	0.1138	0.1109	0.0761			26.8	0.0043	-0.0297	0.0101	0.0174
513.6	0.611989	0.551238	0.576488	0.259326	0.261912	0.26096	0.514319	0.54784	0.538875	0.243328	0.272735	0.272019			513.6	0.406057	0.374062	0.379806	0.280181	0.278024	0.277212	0.400617	0.413687	0.385086	0.261619	0.261984	0.28327			27.2	0.0157	0.0041	0.0116	0.029	0.0183	0.0269	0.0841	0.06	0.0479	0.1133	0.1135	0.0781			27.2	0.006	-0.0297	0.012	0.0177
513.8	0.619379	0.557844	0.583379	0.263193	0.265875	0.264817	0.520634	0.554364	0.545158	0.246965	0.276781	0.276057			513.8	0.411722	0.379133	0.384838	0.284262	0.282184	0.28126	0.406162	0.419235	0.390213	0.265466	0.265874	0.287391			27.6	0.0152	0.0043	0.012	0.0292	0.0177	0.0272	0.0874	0.0595	0.048	0.1145	0.1132	0.0794			27.6	0.0043	-0.0297	0.0135	0.0185
514	0.628612	0.566116	0.592146	0.268072	0.270762	0.269668	0.528387	0.562551	0.55308	0.251507	0.281948	0.281258			514	0.418798	0.385628	0.391322	0.289565	0.287345	0.286449	0.413084	0.426181	0.396904	0.270381	0.270571	0.292701			28	0.0171	0.0051	0.0113	0.0305	0.0195	0.0267	0.0887	0.0623	0.0469	0.1156	0.1147	0.0794			28	0.0055	-0.0281	0.0119	0.0186
514.2	0.635988	0.572736	0.598987	0.271946	0.274739	0.273493	0.534623	0.569046	0.55962	0.255258	0.286029	0.285385			514.2	0.424448	0.39085	0.39653	0.293743	0.291473	0.290499	0.418707	0.431813	0.402321	0.274373	0.274446	0.296831			28.4	0.0161	0.0052	0.0124	0.0294	0.0196	0.0271	0.0898	0.0625	0.0483	0.1143	0.1129	0.083			28.4	0.005	-0.0293	0.0128	0.0178
514.4	0.645192	0.580764	0.607381	0.27688	0.27968	0.278176	0.542275	0.577245	0.567748	0.259811	0.291338	0.290575			514.4	0.431452	0.397442	0.403026	0.299055	0.296738	0.295589	0.425558	0.438833	0.40886	0.27935	0.27932	0.302285			28.8	0.0172	0.0034	0.0128	0.0313	0.0192	0.0283	0.0904	0.0643	0.05	0.1163	0.1148	0.0821			28.8	0.0057	-0.0295	0.0124	0.0188
514.6	0.652521	0.58724	0.614142	0.280821	0.283625	0.282031	0.548529	0.583669	0.574136	0.263541	0.295523	0.294718			514.6	0.437104	0.402712	0.408277	0.303219	0.300931	0.299678	0.431192	0.444501	0.414101	0.2833	0.283094	0.306659			29.2	0.017	0.0054	0.0123	0.0318	0.0212	0.028	0.0925	0.0656	0.0493	0.1166	0.1165	0.0839			29.2	0.0057	-0.0288	0.013	0.019
514.8	0.66143	0.595394	0.622708	0.285736	0.288493	0.287007	0.556175	0.591699	0.581918	0.268326	0.300859	0.299849			514.8	0.444177	0.409281	0.414931	0.308496	0.30602	0.304873	0.438138	0.451647	0.420696	0.288235	0.288088	0.31194			29.6	0.0175	0.0038	0.0132	0.0329	0.0197	0.0287	0.093	0.0669	0.0507	0.1173	0.1156	0.0856			29.6	0.0061	-0.0288	0.0125	0.0199
515	0.668693	0.601971	0.629649	0.289695	0.292405	0.290978	0.562338	0.598263	0.588343	0.27219	0.305122	0.30409			515	0.449983	0.414523	0.420193	0.312661	0.310255	0.309075	0.443656	0.457395	0.426007	0.292322	0.292137	0.316201			30	0.0185	0.0048	0.0127	0.0319	0.0208	0.0277	0.0935	0.0676	0.0503	0.1172	0.1165	0.0859			30	0.007	-0.0286	0.0124	0.0194
515.2	0.677854	0.61028	0.638342	0.29464	0.297503	0.296026	0.570017	0.606277	0.596452	0.276991	0.310367	0.309183			515.2	0.457143	0.420966	0.426831	0.318104	0.315669	0.314374	0.450678	0.464444	0.432573	0.297284	0.29707	0.321702			30.4	0.0178	0.0057	0.0125	0.0334	0.0217	0.0291	0.0962	0.0691	0.0507	0.118	0.1174	0.0874			30.4	0.0069	-0.0279	0.0126	0.0195
515.4	0.68533	0.616821	0.645339	0.298696	0.301515	0.300016	0.576318	0.61259	0.603109	0.280747	0.314447	0.313435			515.4	0.462954	0.426087	0.432189	0.322377	0.319934	0.318593	0.456352	0.470279	0.437794	0.301263	0.301048	0.326034			30.8	0.0181	0.0054	0.0124	0.0331	0.0223	0.0287	0.0969	0.0694	0.0511	0.1175	0.1182	0.0879			30.8	0.0066	-0.0288	0.0126	0.0194
515.6	0.694292	0.625012	0.653938	0.303803	0.306547	0.304931	0.584183	0.620748	0.610928	0.285553	0.319872	0.318775			515.6	0.470258	0.432843	0.438622	0.327699	0.325267	0.323883	0.463346	0.477392	0.444451	0.306222	0.306003	0.331368			31.2	0.0189	0.0064	0.0138	0.0333	0.0235	0.029	0.0984	0.0719	0.052	0.1189	0.1196	0.09			31.2	0.0069	-0.028	0.0136	0.0199
515.8	0.701597	0.631672	0.660953	0.307889	0.31058	0.308844	0.590498	0.62703	0.617201	0.289386	0.32415	0.322973			515.8	0.476047	0.438224	0.443858	0.331986	0.329471	0.328081	0.468843	0.482993	0.449662	0.310196	0.310009	0.335635			31.6	0.0192	0.006	0.0124	0.0346	0.0236	0.029	0.0996	0.0736	0.053	0.1199	0.1189	0.0894			31.6	0.0064	-0.028	0.0127	0.0192
516	0.708718	0.63804	0.667873	0.311807	0.314602	0.312832	0.596595	0.633358	0.623442	0.293124	0.328445	0.327209			516	0.481711	0.443482	0.449177	0.336279	0.3336	0.332277	0.474262	0.488643	0.454911	0.314262	0.313968	0.340003			32	0.0197	0.0057	0.0132	0.0351	0.0235	0.0294	0.1021	0.074	0.0534	0.1202	0.1191	0.091			32	0.0067	-0.0273	0.0129	0.021
516.2	0.717632	0.64604	0.676528	0.31687	0.319667	0.317755	0.604276	0.641195	0.63137	0.297982	0.333834	0.332449			516.2	0.488924	0.449948	0.455907	0.341604	0.338818	0.337579	0.481084	0.495611	0.461381	0.319396	0.318897	0.345507			32.4	0.0194	0.0052	0.0139	0.0366	0.0226	0.0307	0.1021	0.0745	0.0544	0.121	0.1196	0.0926			32.4	0.0074	-0.0281	0.0136	0.0209
516.4	0.724788	0.652508	0.68341	0.320937	0.323706	0.321802	0.610313	0.647539	0.637689	0.301822	0.338015	0.336742			516.4	0.494867	0.455146	0.461262	0.345878	0.342929	0.34191	0.486673	0.501145	0.466632	0.323483	0.322928	0.349869			32.8	0.0197	0.0047	0.0137	0.0347	0.0233	0.0282	0.1043	0.0749	0.0545	0.1198	0.1191	0.0934			32.8	0.0065	-0.0289	0.0125	0.0212
516.6	0.733673	0.660555	0.691996	0.326028	0.328739	0.326748	0.61789	0.655449	0.645576	0.306566	0.34326	0.34214			516.6	0.502093	0.46169	0.467926	0.351246	0.348188	0.347279	0.493641	0.508175	0.47315	0.328547	0.328031	0.355367			33.2	0.0207	0.0063	0.0128	0.0377	0.0236	0.0302	0.1055	0.0766	0.0558	0.1207	0.1197	0.0947			33.2	0.0071	-0.0288	0.0136	0.0209
516.8	0.740972	0.666951	0.69896	0.330225	0.332774	0.330833	0.623936	0.661793	0.651544	0.310507	0.347562	0.34642			516.8	0.50801	0.466978	0.473206	0.355647	0.35248	0.351614	0.499118	0.513684	0.478299	0.332538	0.332094	0.359771			33.6	0.0202	0.0064	0.0136	0.0366	0.0251	0.0303	0.1067	0.0777	0.0551	0.1204	0.1214	0.0956			33.6	0.0072	-0.0289	0.0138	0.0209
517	0.749961	0.675173	0.707565	0.335409	0.337938	0.336043	0.631573	0.669687	0.659072	0.315376	0.352952	0.351821			517	0.515325	0.473442	0.479809	0.361034	0.357837	0.357179	0.506112	0.520681	0.48481	0.337526	0.337113	0.365219			34	0.021	0.0065	0.0147	0.0385	0.0248	0.0311	0.1084	0.0794	0.0575	0.1226	0.1209	0.0976			34	0.0085	-0.0278	0.0147	0.0218
517.2	0.760643	0.684585	0.717829	0.341541	0.343955	0.342218	0.640416	0.679262	0.668329	0.321146	0.359532	0.358221			517.2	0.52402	0.481232	0.487727	0.367663	0.364302	0.363574	0.514127	0.529063	0.492654	0.343831	0.343059	0.371867			34.4	0.0194	0.0068	0.0147	0.0371	0.0256	0.0314	0.1078	0.0802	0.0578	0.121	0.1223	0.0982			34.4	0.0076	-0.0273	0.0143	0.0208
517.4	0.76597	0.689431	0.722955	0.344603	0.347015	0.345318	0.644925	0.684014	0.672893	0.324137	0.362819	0.361396			517.4	0.528462	0.485142	0.49172	0.370913	0.36742	0.366675	0.518227	0.533201	0.496624	0.346908	0.346176	0.375088			34.8	0.0209	0.0075	0.0135	0.0392	0.0259	0.031	0.1098	0.0825	0.0578	0.1213	0.1219	0.0983			34.8	0.0086	-0.0279	0.0151	0.0222
517.6	0.776798	0.699134	0.733437	0.350828	0.353037	0.351619	0.653842	0.69355	0.682012	0.330131	0.369341	0.367921			517.6	0.537207	0.492902	0.499696	0.377458	0.37363	0.373256	0.526187	0.54149	0.504306	0.352999	0.352369	0.381712			35.2	0.0216	0.0062	0.0132	0.0396	0.0257	0.031	0.1097	0.0826	0.0587	0.1212	0.1216	0.0992			35.2	0.0081	-0.0282	0.0133	0.0223
517.8	0.782076	0.704019	0.738646	0.353981	0.356148	0.354836	0.658407	0.698154	0.686503	0.333147	0.372604	0.371214			517.8	0.541671	0.496828	0.503651	0.380681	0.37687	0.376586	0.530428	0.545798	0.508146	0.356101	0.355414	0.384995			35.6	0.0209	0.0071	0.0138	0.0384	0.0281	0.0309	0.1111	0.0846	0.0592	0.1204	0.1224	0.0998			35.6	0.0078	-0.0273	0.0134	0.0224
518	0.792726	0.713526	0.749068	0.360379	0.362255	0.361099	0.667432	0.707643	0.695552	0.339136	0.379227	0.37759			518	0.550428	0.504702	0.511694	0.387358	0.383469	0.383169	0.538483	0.553884	0.515964	0.362254	0.361765	0.391541			36	0.0218	0.0066	0.0151	0.04	0.0268	0.0326	0.112	0.0852	0.0605	0.1227	0.1227	0.102			36	0.0079	-0.0274	0.0142	0.023
518.2	0.798052	0.718257	0.754098	0.363427	0.365395	0.364247	0.672007	0.712276	0.700232	0.342048	0.38243	0.380977			518.2	0.554826	0.508601	0.515642	0.390733	0.38683	0.38651	0.542431	0.558059	0.519982	0.365546	0.36472	0.394811			36.4	0.0222	0.0082	0.0145	0.0405	0.0278	0.032	0.1134	0.0864	0.061	0.1224	0.1236	0.1032			36.4	0.0089	-0.0269	0.0152	0.023
518.4	0.80895	0.727733	0.764361	0.369712	0.371635	0.370358	0.6809	0.721493	0.709236	0.347779	0.389161	0.387501			518.4	0.56333	0.516486	0.523721	0.397356	0.393235	0.392984	0.550407	0.5661	0.527768	0.371606	0.370809	0.401518			36.8	0.0221	0.0071	0.0141	0.0418	0.0274	0.0326	0.1146	0.0857	0.0606	0.1224	0.1223	0.1035			36.8	0.0082	-0.028	0.0147	0.0229
518.6	0.814391	0.732503	0.769504	0.372889	0.37465	0.373402	0.685284	0.726238	0.713673	0.350712	0.392481	0.390863			518.6	0.567755	0.52043	0.527703	0.400633	0.396454	0.396205	0.554422	0.570406	0.531549	0.374775	0.3739	0.404784			37.2	0.0216	0.007	0.0152	0.0412	0.0284	0.0323	0.1163	0.0872	0.0626	0.1223	0.1236	0.1039			37.2	0.0088	-0.0274	0.0144	0.023
518.8	0.824823	0.74221	0.779543	0.379328	0.380735	0.379644	0.693971	0.735541	0.722666	0.356538	0.399006	0.3974			518.8	0.576177	0.528192	0.535485	0.407231	0.402957	0.402778	0.562406	0.578593	0.539348	0.38087	0.380089	0.411259			37.6	0.0233	0.0077	0.0147	0.0423	0.0279	0.0335	0.1174	0.088	0.064	0.1228	0.1229	0.106			37.6	0.0088	-0.0276	0.016	0.0239
519	0.830234	0.747066	0.784643	0.382573	0.383773	0.382925	0.698504	0.739937	0.72716	0.359484	0.402272	0.400587			519	0.5804	0.53204	0.539431	0.410618	0.406053	0.405949	0.566433	0.582754	0.543187	0.384006	0.383215	0.41452			38	0.0239	0.0088	0.0155	0.0422	0.0304	0.0337	0.1176	0.0923	0.0638	0.1234	0.1256	0.1072			38	0.0084	-0.0266	0.0156	0.0249
519.2	0.840711	0.756454	0.794576	0.389058	0.389878	0.38923	0.707094	0.749108	0.736004	0.365641	0.408961	0.407105			519.2	0.58909	0.539772	0.547286	0.417303	0.412739	0.412515	0.574672	0.59116	0.550856	0.390219	0.38934	0.421176			38.4	0.0225	0.0086	0.0143	0.042	0.03	0.0329	0.1173	0.0912	0.0641	0.1228	0.1241	0.1068			38.4	0.0091	-0.0265	0.0149	0.0233
519.4	0.845763	0.761163	0.799481	0.392234	0.393026	0.392447	0.711465	0.753698	0.740386	0.368721	0.412262	0.410354			519.4	0.593403	0.543706	0.551178	0.420511	0.415965	0.415812	0.578698	0.595291	0.554578	0.393292	0.392395	0.424532			38.8	0.0242	0.0086	0.0153	0.0451	0.0299	0.0335	0.121	0.0919	0.0647	0.1249	0.1241	0.1075			38.8	0.0106	-0.0272	0.0155	0.0259
519.6	0.856192	0.770665	0.809516	0.39853	0.399204	0.398675	0.72023	0.762955	0.749235	0.374796	0.419146	0.416917			519.6	0.602024	0.551504	0.559117	0.427233	0.422669	0.422248	0.586503	0.603219	0.562063	0.399518	0.398667	0.431236			39.2	0.0245	0.0083	0.0164	0.0444	0.0308	0.0348	0.1201	0.0943	0.0671	0.1237	0.1247	0.1103			39.2	0.0099	-0.0275	0.0162	0.0242
519.8	0.861541	0.775691	0.814484	0.401602	0.402255	0.401882	0.724648	0.76758	0.753526	0.37778	0.422506	0.42025			519.8	0.606308	0.555352	0.563021	0.430591	0.425914	0.425413	0.590227	0.607282	0.565695	0.402597	0.401949	0.43463			39.6	0.024	0.0086	0.015	0.0456	0.032	0.0337	0.1224	0.0934	0.0673	0.1253	0.1254	0.1094			39.6	0.0103	-0.0271	0.0152	0.0256
520	0.871831	0.785144	0.824195	0.408197	0.408513	0.408111	0.733337	0.776413	0.762324	0.383828	0.429138	0.426638			520	0.614778	0.563187	0.570891	0.437241	0.432432	0.43193	0.597979	0.61541	0.573078	0.409046	0.408184	0.441236			40	0.0243	0.0092	0.0166	0.0452	0.0316	0.0346	0.1215	0.0957	0.069	0.1233	0.127	0.1113			40	0.0104	-0.0268	0.0165	0.0239
520.2	0.880561	0.792895	0.83251	0.41353	0.413826	0.413499	0.740673	0.783911	0.769848	0.388914	0.434701	0.432169			520.2	0.621834	0.56962	0.577507	0.442761	0.438009	0.437434	0.604577	0.622174	0.579504	0.414365	0.41339	0.446795			40.4	0.0246	0.0095	0.0154	0.0454	0.0317	0.0346	0.1218	0.0979	0.0683	0.1242	0.1254	0.1115			40.4	0.0091	-0.0259	0.0156	0.025
520.4	0.887684	0.798909	0.839216	0.41776	0.418074	0.417782	0.746438	0.789917	0.775889	0.393051	0.439169	0.436608			520.4	0.627578	0.574898	0.582804	0.44726	0.442518	0.441677	0.609709	0.627543	0.584505	0.418819	0.417617	0.451259			40.8	0.0257	0.0095	0.0161	0.0473	0.0318	0.0355	0.1244	0.0972	0.0702	0.1237	0.1254	0.114			40.8	0.0102	-0.0271	0.0174	0.0257
520.6	0.896573	0.806752	0.847734	0.423159	0.423338	0.423305	0.75364	0.797519	0.783242	0.398316	0.444738	0.442068			520.6	0.634763	0.581489	0.589652	0.452998	0.448065	0.447444	0.616273	0.634369	0.590729	0.424153	0.422938	0.45692			41.2	0.0255	0.0094	0.0164	0.0471	0.0323	0.0354	0.1241	0.0988	0.071	0.1253	0.1262	0.1128			41.2	0.0098	-0.0259	0.0159	0.0252
520.8	0.903662	0.813005	0.85434	0.427461	0.427636	0.42759	0.759379	0.803477	0.789276	0.402496	0.449298	0.446561			520.8	0.640342	0.586935	0.595213	0.457553	0.452729	0.452067	0.621495	0.63982	0.595679	0.428469	0.427191	0.461429			41.6	0.0253	0.0107	0.0172	0.0479	0.0333	0.0363	0.1246	0.0997	0.0712	0.1251	0.1267	0.114			41.6	0.0106	-0.0257	0.0178	0.0268
521	0.912523	0.821067	0.862567	0.432878	0.433047	0.433008	0.766621	0.810991	0.7966	0.407413	0.454995	0.452174			521	0.64751	0.593426	0.60184	0.463245	0.458443	0.457753	0.627797	0.64655	0.601992	0.433751	0.432522	0.46725			42	0.0258	0.0087	0.0167	0.0494	0.0315	0.0357	0.1259	0.0997	0.0716	0.1258	0.1258	0.1142			42	0.0102	-0.0273	0.0165	0.027
521.2	0.9196	0.827395	0.869278	0.437264	0.437388	0.437388	0.772273	0.816913	0.802347	0.411477	0.459645	0.456597			521.2	0.653198	0.598553	0.607124	0.467887	0.462998	0.462345	0.632899	0.651862	0.607174	0.438045	0.43681	0.471887			42.4	0.0272	0.0093	0.016	0.0488	0.0318	0.0362	0.1264	0.1005	0.0724	0.1254	0.1257	0.115			42.4	0.0113	-0.0273	0.0174	0.027
521.4	0.926729	0.833781	0.875863	0.441546	0.441712	0.441721	0.777999	0.823014	0.808205	0.415543	0.464218	0.461171			521.4	0.65892	0.6037	0.612492	0.472394	0.467286	0.46693	0.638072	0.657193	0.612083	0.442306	0.441099	0.476421			42.8	0.026	0.0093	0.0158	0.0482	0.0341	0.0357	0.1258	0.1012	0.0731	0.1244	0.1259	0.1156			42.8	0.0102	-0.0268	0.0163	0.0261
521.6	0.935824	0.84185	0.884295	0.447101	0.446977	0.447236	0.785151	0.830635	0.815612	0.420614	0.469867	0.466657			521.6	0.666127	0.610249	0.619204	0.478081	0.472715	0.472591	0.644827	0.663878	0.618084	0.447511	0.446474	0.482215			43.2	0.0272	0.0097	0.0163	0.0494	0.0344	0.036	0.1281	0.1016	0.073	0.1249	0.1254	0.1173			43.2	0.011	-0.0263	0.0173	0.0277
521.8	0.942905	0.848252	0.890853	0.451645	0.451417	0.451748	0.790965	0.836614	0.821625	0.424922	0.474408	0.471177			521.8	0.671886	0.615497	0.624474	0.482761	0.477335	0.477133	0.65005	0.669304	0.623034	0.451859	0.450802	0.486767			43.6	0.0266	0.0089	0.0176	0.0495	0.035	0.0374	0.1278	0.1017	0.0747	0.1261	0.1255	0.1168			43.6	0.0109	-0.0275	0.0172	0.0274
522	0.951682	0.856099	0.899163	0.45741	0.456834	0.457282	0.798151	0.844065	0.829198	0.430247	0.480227	0.476841			522	0.679274	0.622042	0.631241	0.488583	0.483082	0.483017	0.65658	0.675869	0.629378	0.457276	0.456343	0.492483			44	0.0269	0.0107	0.016	0.0514	0.0362	0.0367	0.129	0.1036	0.0756	0.1258	0.128	0.117			44	0.0105	-0.0262	0.0168	0.0273
522.2	0.958996	0.862402	0.906116	0.461922	0.461508	0.461782	0.803855	0.850196	0.834917	0.434528	0.485093	0.481386			522.2	0.685323	0.627555	0.636779	0.493271	0.487702	0.487596	0.661799	0.681333	0.634093	0.461684	0.460709	0.497372			44.4	0.0274	0.0097	0.0171	0.0502	0.0349	0.0379	0.1287	0.1046	0.0776	0.1254	0.1272	0.1193			44.4	0.0112	-0.0262	0.0181	0.0272
522.4	0.967943	0.870352	0.914764	0.467538	0.467233	0.467285	0.811074	0.857822	0.842248	0.439921	0.491061	0.487164			522.4	0.692763	0.634272	0.643609	0.499156	0.493747	0.493479	0.668321	0.688041	0.640051	0.467171	0.466202	0.503458			44.8	0.0273	0.0109	0.018	0.0517	0.036	0.037	0.1294	0.1047	0.078	0.125	0.1251	0.1202			44.8	0.0112	-0.0256	0.019	0.0287
522.6	0.975127	0.876739	0.921578	0.471935	0.471784	0.471785	0.816864	0.864001	0.848256	0.444167	0.495866	0.491846			522.6	0.698668	0.63968	0.649137	0.503761	0.498226	0.498168	0.673218	0.693413	0.644966	0.471739	0.470604	0.508183			45.2	0.0278	0.0114	0.0171	0.0512	0.0359	0.0376	0.1292	0.1056	0.0781	0.1259	0.1264	0.1198			45.2	0.0123	-0.0262	0.0187	0.0284
522.8	0.984355	0.884806	0.930252	0.477637	0.477419	0.477417	0.824196	0.871614	0.855721	0.449526	0.501759	0.497655			522.8	0.706223	0.646413	0.655896	0.509747	0.504034	0.504017	0.67952	0.700018	0.651225	0.477283	0.476095	0.514089			45.6	0.027	0.0112	0.0171	0.052	0.0362	0.0381	0.1295	0.1058	0.0795	0.1252	0.1271	0.1208			45.6	0.0108	-0.0265	0.0188	0.028
523	0.995459	0.894584	0.940691	0.484606	0.484526	0.484513	0.832951	0.880756	0.864623	0.456206	0.508898	0.504794			523	0.715309	0.654414	0.664108	0.517047	0.510992	0.511081	0.687532	0.708404	0.659009	0.484203	0.48296	0.521425			46	0.0295	0.0109	0.0185	0.0535	0.0364	0.0384	0.1315	0.1062	0.0799	0.1266	0.1267	0.1213			46	0.0121	-0.0259	0.0191	0.0284
523.2	1.00098	0.899391	0.946011	0.488262	0.488136	0.488055	0.83728	0.885218	0.869178	0.459462	0.512618	0.508405			523.2	0.719736	0.6585	0.668195	0.520676	0.51467	0.51481	0.691616	0.712614	0.662839	0.487576	0.486187	0.524984			46.4	0.0284	0.0107	0.0176	0.0542	0.0374	0.0397	0.1312	0.1083	0.0814	0.1266	0.1275	0.122			46.4	0.0118	-0.0255	0.0181	0.029
523.4	1.01209	0.90941	0.956583	0.495089	0.495106	0.495223	0.846012	0.894471	0.878207	0.466143	0.520166	0.515799			523.4	0.728541	0.66677	0.676639	0.527909	0.522124	0.522169	0.699364	0.720873	0.670558	0.494175	0.4928	0.532272			46.8	0.0285	0.0124	0.019	0.0543	0.0381	0.0387	0.1317	0.1083	0.0824	0.1254	0.1274	0.1219			46.8	0.0121	-0.026	0.02	0.029
523.6	1.01758	0.914415	0.961795	0.4986	0.498492	0.498737	0.850523	0.899242	0.882748	0.469473	0.523881	0.519351			523.6	0.732931	0.670894	0.680839	0.531617	0.525803	0.525816	0.703364	0.724981	0.674195	0.497768	0.496179	0.536078			47.2	0.0304	0.0114	0.0161	0.0549	0.0392	0.0389	0.1322	0.1092	0.0818	0.1254	0.127	0.1223			47.2	0.0136	-0.0251	0.0178	0.0298
523.8	1.02862	0.924499	0.972495	0.505763	0.505492	0.505884	0.859302	0.908495	0.891969	0.476081	0.531344	0.526485			523.8	0.741928	0.678986	0.689215	0.539001	0.532915	0.533256	0.711426	0.733415	0.681634	0.504612	0.503206	0.543253			47.6	0.0287	0.0117	0.0184	0.0535	0.0391	0.039	0.1311	0.1096	0.0833	0.1262	0.1267	0.1237			47.6	0.0115	-0.026	0.0194	0.0283
524	1.03408	0.929563	0.977739	0.509367	0.509152	0.50954	0.863668	0.913008	0.896657	0.479375	0.535168	0.530243			524	0.746554	0.683199	0.693299	0.542521	0.536693	0.536862	0.71536	0.737627	0.685445	0.508124	0.506549	0.5469			48	0.0311	0.0117	0.0182	0.0566	0.0385	0.04	0.1346	0.1109	0.0833	0.1274	0.1285	0.1241			48	0.0132	-0.0251	0.0192	0.0312
524.2	1.04498	0.939679	0.988333	0.516544	0.516352	0.516819	0.872581	0.922381	0.905562	0.486109	0.542535	0.537505			524.2	0.755802	0.691324	0.701524	0.54997	0.543868	0.543835	0.723336	0.745779	0.692923	0.515041	0.513605	0.554514			48.4	0.0306	0.0113	0.0178	0.0576	0.0397	0.0398	0.1352	0.1113	0.0851	0.1276	0.127	0.1246			48.4	0.0129	-0.026	0.019	0.0301
524.4	1.05048	0.944521	0.993661	0.52029	0.519816	0.520392	0.876947	0.927074	0.910071	0.489602	0.546286	0.541302			524.4	0.760328	0.695561	0.705714	0.553814	0.547469	0.547557	0.727446	0.750178	0.696687	0.518509	0.517062	0.558358			48.8	0.0311	0.0119	0.0182	0.057	0.0399	0.0402	0.134	0.111	0.0842	0.1268	0.1287	0.1253			48.8	0.013	-0.0253	0.0186	0.0315
524.6	1.06159	0.954553	1.0042	0.527632	0.527132	0.527611	0.886085	0.936538	0.91927	0.496302	0.553663	0.5489			524.6	0.769336	0.703919	0.714377	0.561105	0.555002	0.554862	0.735529	0.758502	0.704049	0.52546	0.523971	0.565872			49.2	0.0308	0.0118	0.0185	0.0578	0.0397	0.0397	0.1346	0.1118	0.087	0.1273	0.1276	0.1259			49.2	0.0134	-0.0257	0.0196	0.0312
524.8	1.06715	0.959572	1.00958	0.531339	0.530764	0.531377	0.890379	0.941061	0.923714	0.499825	0.557467	0.552688			524.8	0.77387	0.708173	0.718557	0.56481	0.558801	0.558594	0.739514	0.762831	0.707694	0.528881	0.527515	0.56959			49.6	0.0326	0.0114	0.0172	0.0591	0.0399	0.0395	0.1356	0.1109	0.0857	0.1271	0.1283	0.125			49.6	0.014	-0.0252	0.0181	0.0317
525	1.07804	0.970039	1.0204	0.538745	0.538273	0.538692	0.899314	0.950206	0.933041	0.506843	0.565102	0.560495			525	0.782809	0.716588	0.72689	0.572274	0.566537	0.566075	0.74728	0.771192	0.715625	0.535908	0.534847	0.577085			50	0.0317	0.0131	0.0188	0.059	0.0417	0.0406	0.1353	0.1137	0.0881	0.1268	0.1279	0.1256			50	0.0135	-0.0252	0.0202	0.0317
525.2	1.08347	0.974988	1.02569	0.542321	0.542006	0.542177	0.903641	0.954816	0.937372	0.510324	0.569066	0.564194			525.2	0.787288	0.720817	0.731013	0.576083	0.570237	0.569798	0.751127	0.77548	0.719329	0.539486	0.538222	0.580842			50.4	0.0307	0.0126	0.0174	0.0592	0.0419	0.0407	0.1343	0.1138	0.0873	0.1253	0.1285	0.1259			50.4	0.0127	-0.0253	0.0188	0.03
525.4	1.09482	0.985188	1.03677	0.549574	0.549463	0.549712	0.912461	0.96411	0.946187	0.517327	0.576541	0.571801			525.4	0.796271	0.729117	0.73955	0.58361	0.577578	0.577139	0.758855	0.783966	0.72672	0.546539	0.54531	0.588586			50.8	0.0319	0.0131	0.0199	0.0595	0.0422	0.042	0.1358	0.1137	0.0891	0.1277	0.1285	0.127			50.8	0.0127	-0.0243	0.0206	0.0306
525.6	1.10409	0.993598	1.04578	0.555562	0.555348	0.556069	0.920037	0.971668	0.953841	0.523166	0.583071	0.578239			525.6	0.803862	0.736078	0.746753	0.589845	0.583808	0.58346	0.765451	0.790758	0.733334	0.552502	0.551346	0.594926			51.2	0.0312	0.0136	0.0191	0.0591	0.043	0.0419	0.1354	0.1159	0.0911	0.1264	0.1279	0.1279			51.2	0.0137	-0.0248	0.0207	0.0306
525.8	1.11148	1.00038	1.0528	0.560597	0.560229	0.561157	0.926017	0.97781	0.959891	0.527975	0.588268	0.583445			525.8	0.809728	0.741692	0.752501	0.594918	0.588727	0.588519	0.770662	0.796249	0.738598	0.557297	0.556114	0.599951			51.6	0.0326	0.0144	0.0196	0.0607	0.043	0.0422	0.1373	0.1158	0.0915	0.1279	0.1286	0.1279			51.6	0.015	-0.024	0.0216	0.0334
526	1.12082	1.00889	1.06181	0.567054	0.566499	0.567539	0.933414	0.985721	0.967469	0.533833	0.594701	0.590147			526	0.81731	0.748662	0.7598	0.601478	0.595225	0.594947	0.777438	0.803297	0.745042	0.563005	0.562214	0.606459			52	0.0328	0.0142	0.02	0.0612	0.0443	0.0425	0.1364	0.1163	0.0931	0.1268	0.1277	0.1283			52	0.0139	-0.0236	0.0214	0.0314
526.2	1.12817	1.01572	1.06894	0.572136	0.571473	0.572649	0.939201	0.991783	0.973538	0.538523	0.599961	0.595413			526.2	0.823338	0.754281	0.765461	0.6067	0.600423	0.599986	0.782922	0.808945	0.75011	0.567724	0.567148	0.611581			52.4	0.033	0.0141	0.0186	0.0623	0.0442	0.0408	0.1377	0.1164	0.0925	0.1272	0.1292	0.1272			52.4	0.0142	-0.0249	0.0205	0.0326
526.4	1.13554	1.02251	1.07614	0.57726	0.576346	0.577648	0.945011	0.997854	0.979465	0.543061	0.605175	0.60065			526.4	0.829247	0.760071	0.771213	0.611731	0.605698	0.605129	0.788144	0.814538	0.755144	0.572351	0.571839	0.616578			52.8	0.0317	0.0133	0.0194	0.0616	0.0444	0.0426	0.1365	0.117	0.0942	0.1272	0.1286	0.1287			52.8	0.0127	-0.0238	0.0204	0.0311
526.6	1.14468	1.03097	1.08517	0.583536	0.582568	0.583916	0.95235	1.00545	0.986924	0.548873	0.61171	0.607134			526.6	0.836762	0.767314	0.778453	0.618104	0.612013	0.611482	0.794646	0.821335	0.761453	0.578252	0.577825	0.622802			53.2	0.0329	0.014	0.0195	0.0624	0.0446	0.0432	0.137	0.1183	0.0945	0.1268	0.1297	0.1294			53.2	0.014	-0.0236	0.0205	0.0318
526.8	1.15206	1.03759	1.09229	0.588657	0.587542	0.58894	0.958312	1.01164	0.992922	0.553586	0.617011	0.612226			526.8	0.842807	0.772928	0.78408	0.623251	0.617023	0.616558	0.799795	0.826494	0.766436	0.58311	0.582786	0.627943			53.6	0.0328	0.0136	0.0204	0.0637	0.045	0.0439	0.1374	0.1174	0.095	0.1275	0.1275	0.1293			53.6	0.0147	-0.0234	0.0208	0.0322
527	1.16142	1.04585	1.10123	0.595097	0.593949	0.595219	0.965449	1.01946	1.00061	0.559427	0.623619	0.618722			527	0.850469	0.78014	0.791022	0.629527	0.623427	0.622837	0.806241	0.833167	0.772842	0.589078	0.589046	0.63441			54	0.0338	0.0154	0.0202	0.0634	0.0461	0.0437	0.1384	0.1188	0.0966	0.1278	0.1291	0.13			54	0.0148	-0.0243	0.0224	0.0331
527.2	1.16869	1.0528	1.10847	0.600219	0.598974	0.600249	0.971237	1.0257	1.00648	0.5642	0.628958	0.624			527.2	0.856578	0.785846	0.796713	0.634724	0.628498	0.628101	0.811393	0.838655	0.778006	0.593699	0.593881	0.639699			54.4	0.0338	0.0129	0.0201	0.0642	0.0448	0.0425	0.1386	0.1164	0.0959	0.1277	0.1278	0.1298			54.4	0.0143	-0.025	0.0206	0.0326
527.4	1.17769	1.06147	1.11728	0.606469	0.605381	0.60638	0.978386	1.03338	1.01388	0.5701	0.635664	0.630583			527.4	0.863973	0.792871	0.803855	0.64114	0.634778	0.634532	0.817856	0.845373	0.784439	0.59953	0.599968	0.646276			54.8	0.0352	0.0151	0.0212	0.0651	0.0464	0.0437	0.1393	0.1194	0.0978	0.1271	0.1288	0.1307			54.8	0.0163	-0.0237	0.0223	0.0344
527.6	1.18477	1.0681	1.12451	0.611572	0.610334	0.611316	0.984202	1.03957	1.01974	0.574886	0.640987	0.635741			527.6	0.869904	0.798372	0.809465	0.646146	0.639833	0.639762	0.822992	0.850977	0.789647	0.604323	0.604775	0.651377			55.2	0.0345	0.0145	0.019	0.0659	0.0466	0.0431	0.1388	0.1188	0.0976	0.1263	0.1288	0.1303			55.2	0.0149	-0.0244	0.0213	0.0336
527.8	1.19368	1.07647	1.13351	0.617844	0.616736	0.617662	0.991277	1.04716	1.02709	0.580708	0.647654	0.642213			527.8	0.877157	0.805307	0.816537	0.652472	0.646251	0.646201	0.829332	0.85768	0.795934	0.610291	0.610743	0.657757			55.6	0.0347	0.0153	0.0207	0.0652	0.0475	0.0445	0.1382	0.1202	0.0981	0.1268	0.1291	0.1314			55.6	0.0152	-0.0223	0.0218	0.0334
528	1.20441	1.08645	1.1443	0.625354	0.624131	0.625225	0.999676	1.05596	1.03595	0.588066	0.655733	0.650068			528	0.886003	0.813588	0.824866	0.660451	0.653941	0.653735	0.83691	0.865679	0.803247	0.617482	0.618051	0.665322			56	0.0351	0.015	0.0208	0.0666	0.0467	0.0437	0.1392	0.1193	0.0999	0.1276	0.1291	0.1306			56	0.0158	-0.0244	0.0227	0.0336
528.2	1.20973	1.09145	1.14972	0.629077	0.627928	0.628828	1.00397	1.06049	1.04036	0.591716	0.659698	0.65393			528.2	0.890371	0.817771	0.829082	0.664329	0.657839	0.65754	0.840572	0.869639	0.807073	0.621239	0.62152	0.669061			56.4	0.0352	0.0153	0.0201	0.0662	0.0482	0.0442	0.1397	0.1201	0.0998	0.1279	0.129	0.1316			56.4	0.0158	-0.0234	0.0221	0.0347
528.4	1.22046	1.10097	1.16033	0.636621	0.635247	0.636544	1.01221	1.06944	1.04885	0.598934	0.667753	0.661674			528.4	0.899536	0.826111	0.837652	0.671945	0.665385	0.665232	0.848226	0.87776	0.814381	0.628472	0.628597	0.676867			56.8	0.0361	0.0139	0.0213	0.0689	0.0469	0.0444	0.1407	0.1202	0.1026	0.1279	0.1279	0.132			56.8	0.0158	-0.0238	0.0217	0.0351
528.6	1.22598	1.10617	1.16579	0.640393	0.638883	0.640491	1.01637	1.07403	1.05339	0.602584	0.671772	0.665795			528.6	0.904128	0.830132	0.841994	0.675656	0.669224	0.669117	0.8521	0.881535	0.818173	0.631972	0.63229	0.680681			57.2	0.0363	0.0152	0.0207	0.0687	0.0486	0.0455	0.1396	0.1201	0.1023	0.1277	0.1293	0.132			57.2	0.017	-0.0229	0.0221	0.0346
528.8	1.23618	1.11635	1.17618	0.648013	0.64665	0.647931	1.02467	1.08275	1.06192	0.609626	0.679712	0.673637			528.8	0.912905	0.838576	0.850122	0.683159	0.676942	0.67678	0.859604	0.889526	0.825503	0.638953	0.639626	0.688319			57.6	0.0358	0.016	0.0216	0.0688	0.0495	0.0462	0.1404	0.1217	0.1036	0.1267	0.1296	0.1325			57.6	0.0163	-0.0228	0.0232	0.0349
529	1.24121	1.12128	1.18136	0.651945	0.650404	0.651713	1.02876	1.0873	1.06597	0.613321	0.683553	0.677666			529	0.917109	0.842451	0.85434	0.686923	0.680749	0.680626	0.863217	0.893526	0.829138	0.64253	0.643209	0.692049			58	0.0354	0.0151	0.0221	0.0701	0.0492	0.0458	0.1403	0.1196	0.1042	0.1284	0.1269	0.1332			58	0.0157	-0.0238	0.0232	0.0346
529.2	1.25168	1.13105	1.19193	0.659198	0.65798	0.659261	1.03673	1.09588	1.07451	0.620328	0.691647	0.685211			529.2	0.925997	0.850429	0.862455	0.694691	0.688344	0.688212	0.870316	0.901303	0.836254	0.649756	0.65067	0.699812			58.4	0.0356	0.0162	0.0214	0.0705	0.0497	0.0462	0.1402	0.1214	0.1036	0.1286	0.1286	0.1316			58.4	0.0161	-0.0233	0.0233	0.0349
529.4	1.25692	1.13595	1.19719	0.66268	0.661654	0.663015	1.04068	1.09996	1.07885	0.623871	0.695795	0.689023			529.4	0.930195	0.854484	0.866526	0.698272	0.692044	0.692024	0.873803	0.905049	0.839513	0.653304	0.654205	0.703616			58.8	0.0364	0.0157	0.022	0.0701	0.0496	0.0468	0.1409	0.1218	0.1054	0.127	0.1283	0.1341			58.8	0.0154	-0.0235	0.0241	0.0351
529.6	1.26711	1.14551	1.20775	0.670215	0.669058	0.670384	1.04872	1.10863	1.08727	0.630888	0.703927	0.696819			529.6	0.938811	0.862439	0.874832	0.705732	0.699734	0.699653	0.880781	0.912834	0.846528	0.66046	0.66124	0.711391			59.2	0.0382	0.0164	0.021	0.0719	0.0513	0.0472	0.1402	0.1233	0.1066	0.1288	0.13	0.1332			59.2	0.0167	-0.0229	0.0232	0.0371
529.8	1.27215	1.15027	1.21286	0.673884	0.672749	0.674064	1.05257	1.11293	1.09148	0.634555	0.707836	0.700872			529.8	0.94324	0.866299	0.878896	0.709552	0.703398	0.703403	0.884294	0.916331	0.850092	0.664016	0.664862	0.715282			59.6	0.0362	0.0159	0.022	0.0716	0.0517	0.0469	0.1411	0.1228	0.1065	0.1281	0.1303	0.1341			59.6	0.0168	-0.0237	0.0233	0.0349
530	1.28238	1.15966	1.22326	0.681277	0.680116	0.681483	1.06043	1.12157	1.09977	0.641463	0.715831	0.708666			530	0.951979	0.873983	0.886806	0.716695	0.711015	0.710516	0.891428	0.923614	0.857175	0.671203	0.672182	0.722929			60	0.0377	0.0172	0.0207	0.0719	0.0522	0.0463	0.1409	0.122	0.1062	0.1281	0.1296	0.1331			60	0.0174	-0.0224	0.0234	0.0357
530.2	1.28907	1.16603	1.2301	0.686119	0.6851	0.686409	1.06556	1.12726	1.10502	0.64598	0.72097	0.714071			530.2	0.957562	0.879248	0.89224	0.721439	0.715972	0.715479	0.896096	0.928825	0.861776	0.675871	0.676811	0.728032			60.4	0.0374	0.0165	0.0226	0.0724	0.0523	0.0477	0.1409	0.1222	0.1084	0.1281	0.1293	0.1339			60.4	0.017	-0.0227	0.0241	0.0353
530.4	1.29708	1.17376	1.23834	0.691997	0.691147	0.692496	1.07199	1.13396	1.11124	0.651663	0.727495	0.720713			530.4	0.964405	0.885593	0.898969	0.727321	0.721944	0.721746	0.901797	0.934992	0.867382	0.681643	0.68253	0.734057			60.8	0.0377	0.0166	0.0222	0.0734	0.0531	0.0481	0.1415	0.124	0.1089	0.1287	0.1297	0.1336			60.8	0.0169	-0.0226	0.0237	0.0367
530.6	1.30365	1.17969	1.24478	0.696697	0.695904	0.697367	1.07708	1.13919	1.11648	0.656233	0.732737	0.725932			530.6	0.969872	0.890702	0.904259	0.732085	0.726861	0.726405	0.906124	0.939709	0.871822	0.686299	0.687117	0.738876			61.2	0.0378	0.0159	0.0224	0.0734	0.0528	0.0493	0.1415	0.1223	0.1098	0.1282	0.1298	0.1346			61.2	0.017	-0.0225	0.0237	0.036
530.8	1.31164	1.18703	1.25308	0.702749	0.701742	0.703567	1.08355	1.14572	1.12284	0.661969	0.739206	0.732291			530.8	0.976818	0.896997	0.910804	0.738054	0.733014	0.732339	0.911694	0.94574	0.87728	0.692051	0.69291	0.744852			61.6	0.0391	0.0166	0.0217	0.0748	0.0529	0.0478	0.1426	0.1246	0.1093	0.1285	0.1293	0.1337			61.6	0.0174	-0.0225	0.0231	0.0371
531	1.31825	1.19323	1.25936	0.70764	0.70667	0.708518	1.0883	1.1509	1.12801	0.666501	0.744321	0.737553			531	0.982223	0.902022	0.915916	0.742945	0.737869	0.737216	0.916045	0.950432	0.881615	0.696568	0.697441	0.749786			62	0.0376	0.0171	0.0216	0.0732	0.0549	0.0472	0.1406	0.1243	0.1097	0.128	0.131	0.1346			62	0.0169	-0.0219	0.0229	0.0364
531.2	1.32632	1.20083	1.26753	0.713698	0.71264	0.714513	1.09442	1.15735	1.13444	0.672428	0.750831	0.74396			531.2	0.98919	0.908424	0.92226	0.748744	0.74392	0.743188	0.921519	0.956217	0.887022	0.702174	0.703334	0.755806			62.4	0.0377	0.0188	0.0218	0.075	0.0548	0.0487	0.142	0.1241	0.1111	0.1292	0.1301	0.1343			62.4	0.0173	-0.0213	0.0252	0.0372
531.4	1.33268	1.20663	1.27391	0.718476	0.717371	0.719441	1.09932	1.16253	1.13942	0.676862	0.755871	0.748916			531.4	0.994451	0.913542	0.927331	0.753252	0.748584	0.747957	0.925892	0.961055	0.891252	0.706774	0.70779	0.76069			62.8	0.0389	0.0173	0.021	0.0737	0.0549	0.0479	0.1399	0.1239	0.1113	0.1265	0.1293	0.1342			62.8	0.0165	-0.0219	0.0238	0.0362
531.6	1.34056	1.21381	1.28173	0.724381	0.723321	0.725682	1.10539	1.16888	1.14568	0.682348	0.76216	0.755235			531.6	1.0011	0.919902	0.933578	0.758965	0.75427	0.75396	0.931381	0.966779	0.896348	0.712351	0.713525	0.766977			63.2	0.0391	0.0182	0.0227	0.0765	0.0554	0.0491	0.1429	0.1246	0.1125	0.1295	0.1303	0.1343			63.2	0.018	-0.0225	0.025	0.0377
531.8	1.34933	1.22249	1.29078	0.731393	0.730625	0.732674	1.11241	1.17626	1.15292	0.68902	0.769562	0.76256			531.8	1.00893	0.92697	0.941104	0.765983	0.761087	0.761077	0.937612	0.973579	0.902479	0.719255	0.720216	0.773916			63.6	0.0396	0.0182	0.0224	0.0775	0.0561	0.0504	0.1429	0.1252	0.1133	0.1275	0.1297	0.1353			63.6	0.018	-0.023	0.0256	0.0368
532	1.35366	1.22653	1.2952	0.734917	0.734194	0.736148	1.116	1.17975	1.15646	0.692354	0.773277	0.76633			532	1.01275	0.93064	0.944734	0.769301	0.764418	0.764283	0.940728	0.977069	0.905429	0.722568	0.723509	0.777455			64	0.0389	0.0194	0.0223	0.0767	0.0569	0.0493	0.142	0.1243	0.1143	0.1274	0.1306	0.1355			64	0.0174	-0.0216	0.0256	0.0378
532.2	1.36257	1.23494	1.3045	0.74182	0.740844	0.743494	1.12296	1.18709	1.16394	0.698993	0.781143	0.773796			532.2	1.02051	0.937572	0.952478	0.776123	0.771356	0.771084	0.946771	0.983546	0.911399	0.729136	0.730232	0.784385			64.4	0.0403	0.0185	0.0231	0.0774	0.0565	0.0506	0.1421	0.1259	0.1146	0.129	0.1316	0.136			64.4	0.0164	-0.0215	0.0256	0.0382
532.4	1.36712	1.23908	1.30913	0.745483	0.744398	0.746931	1.12625	1.19064	1.16737	0.702093	0.78498	0.777198			532.4	1.02451	0.941164	0.955925	0.779551	0.774729	0.77448	0.949923	0.986777	0.914332	0.732475	0.733553	0.787836			64.8	0.0382	0.0194	0.0237	0.0774	0.0574	0.0511	0.1415	0.1239	0.1145	0.1274	0.1313	0.1362			64.8	0.0163	-0.0213	0.0266	0.0375
532.6	1.37555	1.24713	1.31792	0.752485	0.751673	0.753932	1.13285	1.19781	1.1743	0.708636	0.792029	0.784639			532.6	1.03171	0.948316	0.963156	0.786081	0.781267	0.780973	0.955872	0.993272	0.920178	0.738926	0.739948	0.794494			65.2	0.0399	0.0193	0.0234	0.0791	0.0577	0.0501	0.142	0.1249	0.115	0.1284	0.1308	0.1364			65.2	0.0175	-0.0215	0.0258	0.0388
532.8	1.3797	1.25103	1.3221	0.755895	0.754965	0.757321	1.13605	1.20133	1.17742	0.711907	0.795496	0.788203			532.8	1.0353	0.95174	0.966621	0.789476	0.784713	0.784173	0.95891	0.996553	0.923149	0.742064	0.743075	0.797814			65.6	0.0407	0.019	0.0222	0.0788	0.0565	0.0509	0.1427	0.1253	0.116	0.1284	0.13	0.1365			65.6	0.018	-0.0209	0.026	0.038
533	1.38805	1.259	1.33057	0.7626	0.761832	0.764047	1.14243	1.20811	1.18398	0.718346	0.802478	0.795378			533	1.0422	0.958552	0.973543	0.795876	0.790991	0.790722	0.964765	1.00289	0.928732	0.748253	0.749355	0.804417			66	0.041	0.0202	0.0236	0.0809	0.0587	0.0514	0.1421	0.126	0.1163	0.1282	0.13	0.1367			66	0.0188	-0.0211	0.0268	0.0389
533.2	1.39192	1.26313	1.33469	0.765951	0.76519	0.767508	1.14585	1.21152	1.18708	0.721587	0.806012	0.798749			533.2	1.04563	0.961645	0.976892	0.799053	0.794202	0.793766	0.967678	1.00636	0.931324	0.751214	0.752383	0.8076			66.4	0.0408	0.0202	0.023	0.0802	0.058	0.0514	0.1427	0.1262	0.1176	0.1288	0.1305	0.1363			66.4	0.0188	-0.021	0.0267	0.0388
533.4	1.3998	1.27105	1.34277	0.772648	0.771941	0.774178	1.15209	1.2182	1.19346	0.728136	0.813166	0.805712			533.4	1.05212	0.968328	0.983709	0.805715	0.800501	0.800457	0.97312	1.01262	0.936727	0.757155	0.758257	0.814157			66.8	0.0416	0.0212	0.0236	0.0809	0.0604	0.0514	0.1429	0.1265	0.1181	0.1292	0.1313	0.1368			66.8	0.0197	-0.0202	0.0273	0.0401
533.6	1.40398	1.27471	1.34655	0.775908	0.775175	0.777448	1.15511	1.22143	1.19671	0.731404	0.816855	0.809182			533.6	1.05582	0.971522	0.987316	0.809088	0.803631	0.803727	0.975863	1.01558	0.939494	0.760145	0.761407	0.817395			67.2	0.041	0.0215	0.0233	0.0801	0.0604	0.0516	0.1423	0.1283	0.1177	0.1278	0.1307	0.136			67.2	0.0177	-0.02	0.0273	0.0387
533.8	1.41179	1.28245	1.35479	0.782616	0.781775	0.784167	1.16117	1.22797	1.20296	0.738044	0.823756	0.816134			533.8	1.06255	0.977787	0.993842	0.815873	0.809758	0.810148	0.981244	1.02179	0.944789	0.766043	0.767454	0.824009			67.6	0.0423	0.0198	0.0244	0.0818	0.0607	0.0521	0.1424	0.1276	0.1196	0.1303	0.1306	0.1368			67.6	0.0197	-0.0211	0.0274	0.0404
534	1.41686	1.28762	1.35999	0.787008	0.786057	0.788469	1.16495	1.23223	1.207	0.742396	0.828393	0.820733			534	1.06687	0.981793	0.998063	0.819989	0.813854	0.81436	0.98483	1.02571	0.948339	0.769969	0.771474	0.828326			68	0.0418	0.0202	0.0248	0.0819	0.0601	0.0536	0.1425	0.127	0.1199	0.1286	0.1315	0.1378			68	0.0191	-0.02	0.0272	0.0391
534.2	1.42331	1.29347	1.36662	0.792459	0.791297	0.793892	1.16958	1.23748	1.21206	0.747657	0.834202	0.826629			534.2	1.07221	0.986784	1.00332	0.825128	0.818903	0.819537	0.989258	1.03044	0.952755	0.774753	0.77634	0.833666			68.4	0.0417	0.021	0.0227	0.0821	0.0619	0.0519	0.1423	0.1276	0.1192	0.1288	0.132	0.1377			68.4	0.0192	-0.0197	0.0264	0.0392
534.4	1.42824	1.29818	1.37171	0.79637	0.795458	0.79816	1.17335	1.24135	1.21592	0.751644	0.838768	0.831028			534.4	1.07638	0.990886	1.00758	0.829091	0.822824	0.823485	0.992715	1.03411	0.95602	0.778435	0.780116	0.837794			68.8	0.0426	0.0221	0.0241	0.0834	0.0621	0.0525	0.143	0.1277	0.1205	0.128	0.1317	0.1372			68.8	0.0195	-0.0188	0.0276	0.04
534.6	1.43403	1.30398	1.37771	0.801391	0.800636	0.803549	1.17801	1.24613	1.22052	0.756566	0.844273	0.83652			534.6	1.08155	0.995607	1.01275	0.834213	0.827602	0.828507	0.997086	1.03873	0.95996	0.783157	0.784692	0.842949			69.2	0.042	0.0212	0.024	0.085	0.0624	0.052	0.144	0.1273	0.121	0.1297	0.131	0.1386			69.2	0.0201	-0.0206	0.0278	0.0406
534.8	1.43857	1.30867	1.38234	0.805644	0.804936	0.80761	1.18144	1.25012	1.22431	0.760606	0.848816	0.84088			534.8	1.0858	0.999369	1.01671	0.838091	0.831468	0.832526	1.00032	1.04213	0.963258	0.786677	0.788694	0.846883			69.6	0.0428	0.0212	0.0255	0.0843	0.0627	0.0533	0.1445	0.1281	0.1216	0.129	0.1314	0.1385			69.6	0.0198	-0.0209	0.0285	0.0403
535	1.44431	1.31446	1.38815	0.811	0.81002	0.812746	1.18568	1.25512	1.22886	0.765455	0.854192	0.846337			535	1.09095	1.00405	1.02177	0.842945	0.836494	0.837189	1.00428	1.04661	0.96745	0.790995	0.793219	0.851654			70	0.043	0.0209	0.0248	0.0839	0.0622	0.0525	0.1442	0.1273	0.122	0.1286	0.1296	0.1382			70	0.0202	-0.0202	0.0273	0.0407
535.2	1.44897	1.31865	1.39289	0.815042	0.813909	0.816951	1.18916	1.25876	1.23231	0.769321	0.858616	0.850698			535.2	1.09482	1.00788	1.02572	0.846584	0.84017	0.84096	1.0073	1.04986	0.970406	0.794316	0.796827	0.855495			70.4	0.0436	0.0205	0.0247	0.085	0.0628	0.0539	0.1436	0.1257	0.1231	0.1293	0.1302	0.1379			70.4	0.0201	-0.021	0.0286	0.0409
535.4	1.45458	1.32379	1.39905	0.819983	0.818675	0.821991	1.1934	1.2635	1.23664	0.77389	0.864023	0.855845			535.4	1.09979	1.01263	1.03048	0.851552	0.844917	0.845909	1.01104	1.05399	0.974034	0.798575	0.801371	0.86031			70.8	0.0436	0.021	0.024	0.085	0.063	0.0545	0.1432	0.1268	0.1235	0.1285	0.1298	0.1383			70.8	0.0201	-0.0198	0.0283	0.0406
535.6	1.46091	1.33032	1.40569	0.825842	0.824639	0.827664	1.19827	1.2688	1.24148	0.779415	0.8699	0.861821			535.6	1.10554	1.01794	1.03595	0.857209	0.850476	0.851612	1.01564	1.05881	0.978473	0.80349	0.806618	0.866059			71.2	0.0432	0.0217	0.0241	0.0872	0.0638	0.0541	0.1437	0.1283	0.1224	0.1287	0.1314	0.1369			71.2	0.0198	-0.0202	0.0283	0.0413
535.8	1.46394	1.33355	1.40873	0.828645	0.827484	0.830621	1.20075	1.27151	1.24396	0.782432	0.872869	0.864896			535.8	1.10815	1.02079	1.03883	0.859927	0.8533	0.854349	1.01773	1.06118	0.980688	0.805901	0.809095	0.868874			71.6	0.0438	0.0226	0.0245	0.087	0.0641	0.0545	0.1432	0.1267	0.1237	0.129	0.1307	0.1382			71.6	0.0207	-0.0207	0.0297	0.0405
536	1.47033	1.33969	1.41508	0.834445	0.832944	0.836272	1.20533	1.2768	1.24901	0.788059	0.879333	0.871036			536	1.11366	1.02579	1.04403	0.865082	0.859166	0.86009	1.022	1.06585	0.985079	0.810536	0.813914	0.874118			72	0.045	0.0217	0.0248	0.0877	0.0634	0.0537	0.1441	0.1272	0.1237	0.1299	0.1296	0.1373			72	0.0219	-0.0212	0.0287	0.0419
536.2	1.47346	1.34255	1.41827	0.83736	0.836073	0.839285	1.20766	1.27936	1.25141	0.790719	0.882371	0.874083			536.2	1.1164	1.02832	1.0467	0.867663	0.861652	0.862681	1.02421	1.06803	0.987311	0.8129	0.81648	0.876784			72.4	0.044	0.0203	0.0254	0.0873	0.0649	0.0537	0.144	0.1271	0.1243	0.1282	0.1296	0.1385			72.4	0.0205	-0.0205	0.0276	0.041
536.4	1.47931	1.34799	1.4247	0.843002	0.841595	0.845036	1.212	1.28405	1.25612	0.796065	0.888272	0.880011			536.4	1.12179	1.03341	1.05226	0.87292	0.866905	0.867976	1.02828	1.07226	0.99166	0.817816	0.82167	0.882121			72.8	0.0437	0.022	0.0239	0.0884	0.0653	0.0538	0.1441	0.1275	0.1254	0.1286	0.1301	0.1376			72.8	0.0203	-0.02	0.0286	0.0418
536.6	1.48248	1.35057	1.42787	0.845662	0.844346	0.847743	1.21393	1.28636	1.25832	0.798645	0.891334	0.882912			536.6	1.12445	1.03609	1.05509	0.875379	0.869503	0.870664	1.03038	1.07428	0.993842	0.82032	0.824224	0.884807			73.2	0.0467	0.0239	0.0257	0.0891	0.0666	0.0561	0.1451	0.1285	0.1257	0.1305	0.131	0.1385			73.2	0.0213	-0.0197	0.0308	0.0425
536.8	1.48808	1.35613	1.43391	0.85091	0.849758	0.853053	1.21812	1.29087	1.26263	0.803925	0.896893	0.888538			536.8	1.12983	1.04111	1.06012	0.880423	0.874672	0.875594	1.03408	1.07838	0.997644	0.825119	0.829163	0.890035			73.6	0.0446	0.0227	0.0242	0.0891	0.0671	0.0549	0.1441	0.1288	0.1256	0.1294	0.1309	0.1372			73.6	0.0205	-0.019	0.0286	0.042
537	1.49068	1.35905	1.4371	0.853622	0.852618	0.855813	1.22024	1.29311	1.26476	0.806485	0.899803	0.891368			537	1.13228	1.04376	1.06249	0.882691	0.877466	0.878242	1.03603	1.08046	0.999412	0.827449	0.83151	0.892541			74	0.0443	0.0234	0.0247	0.0899	0.0669	0.0546	0.1433	0.1297	0.1251	0.1295	0.1314	0.1379			74	0.021	-0.0189	0.0292	0.0429
537.2	1.49615	1.36421	1.44274	0.858912	0.857732	0.861029	1.22436	1.29753	1.26884	0.811167	0.905081	0.896743			537.2	1.13715	1.04843	1.06753	0.887264	0.882535	0.882707	1.03968	1.0845	1.00313	0.831871	0.836178	0.897024			74.4	0.0446	0.0229	0.0248	0.0899	0.068	0.0548	0.1446	0.1287	0.1267	0.1303	0.1309	0.1374			74.4	0.0216	-0.0197	0.0288	0.0425
537.4	1.49957	1.36734	1.44644	0.862374	0.861206	0.864693	1.2269	1.30018	1.27149	0.814262	0.908716	0.900138			537.4	1.14053	1.05185	1.07075	0.89037	0.8856	0.885773	1.04217	1.08713	1.00543	0.834714	0.839288	0.900156			74.8	0.0461	0.0238	0.025	0.0914	0.0668	0.0555	0.1454	0.1287	0.1272	0.1298	0.1317	0.1385			74.8	0.0221	-0.0191	0.0303	0.0432
537.6	1.50379	1.37176	1.45089	0.866738	0.8656	0.868926	1.23012	1.30361	1.27485	0.818361	0.91325	0.90444			537.6	1.14452	1.05601	1.0749	0.894302	0.889536	0.889532	1.04494	1.09061	1.00816	0.838207	0.843287	0.904014			75.2	0.0456	0.0233	0.0256	0.0901	0.0684	0.0559	0.1438	0.1286	0.1274	0.1281	0.1305	0.1391			75.2	0.0208	-0.0188	0.0302	0.0432
537.8	1.50704	1.37499	1.45455	0.87022	0.868851	0.87232	1.2325	1.30621	1.27736	0.821635	0.916707	0.908068			537.8	1.14754	1.05896	1.07806	0.897222	0.892763	0.89252	1.04713	1.09314	1.01053	0.841096	0.846519	0.907049			75.6	0.046	0.0244	0.0255	0.0917	0.0691	0.0563	0.1446	0.1298	0.1277	0.1298	0.1317	0.1381			75.6	0.0215	-0.0187	0.0308	0.043
538	1.51129	1.37892	1.4593	0.874413	0.87296	0.876443	1.23532	1.30949	1.2805	0.825684	0.921096	0.912425			538	1.15138	1.06283	1.0821	0.900808	0.896821	0.896243	1.04974	1.09617	1.01352	0.844537	0.850486	0.910816			76	0.046	0.0246	0.0255	0.0917	0.0695	0.057	0.1452	0.1303	0.128	0.128	0.1319	0.1384			76	0.0222	-0.0183	0.0307	0.0429
538.2	1.51465	1.38198	1.46293	0.877417	0.876102	0.879722	1.23773	1.31181	1.28275	0.82879	0.92462	0.915812			538.2	1.15437	1.06568	1.08514	0.903796	0.899866	0.899123	1.05198	1.09877	1.01572	0.847316	0.853209	0.913807			76.4	0.0464	0.0242	0.0261	0.0927	0.069	0.0573	0.1452	0.1282	0.1285	0.1296	0.1307	0.1396			76.4	0.0226	-0.0188	0.0308	0.0437
538.4	1.51854	1.38573	1.46748	0.881322	0.880116	0.88363	1.2407	1.31478	1.28554	0.832828	0.929343	0.919987			538.4	1.15805	1.06908	1.08886	0.907436	0.903458	0.902915	1.05476	1.10177	1.01836	0.850873	0.856999	0.917474			76.8	0.0456	0.0244	0.0251	0.0931	0.0685	0.056	0.1443	0.1286	0.1283	0.1291	0.131	0.1378			76.8	0.0209	-0.0188	0.0301	0.0424
538.6	1.52134	1.38869	1.47079	0.884574	0.883299	0.88659	1.24285	1.31706	1.28787	0.835775	0.932692	0.92344			538.6	1.16083	1.07181	1.09165	0.91039	0.906573	0.905791	1.05691	1.10432	1.02057	0.853499	0.859941	0.920523			77.2	0.0463	0.0244	0.0263	0.093	0.0701	0.0575	0.1452	0.129	0.1295	0.1295	0.1309	0.14			77.2	0.022	-0.0193	0.0313	0.0436
538.8	1.52478	1.39264	1.47442	0.888691	0.887525	0.890527	1.24547	1.31982	1.29054	0.839647	0.936862	0.927504			538.8	1.16389	1.07504	1.09507	0.913822	0.910254	0.909311	1.05958	1.1072	1.02338	0.856634	0.863459	0.924214			77.6	0.0456	0.0242	0.0268	0.093	0.0699	0.0568	0.1438	0.1296	0.1293	0.1286	0.1307	0.1395			77.6	0.0206	-0.0188	0.0309	0.043
539	1.52916	1.39625	1.47915	0.893431	0.892087	0.895152	1.24848	1.32308	1.29356	0.843879	0.941985	0.932352			539	1.16763	1.079	1.0989	0.917736	0.914286	0.913493	1.06252	1.11063	1.02667	0.860647	0.867493	0.928505			78	0.0473	0.0262	0.0254	0.0945	0.0722	0.0575	0.1453	0.1303	0.1282	0.1301	0.1328	0.1388			78	0.0226	-0.0182	0.0312	0.0446
539.2	1.53125	1.39826	1.48172	0.895636	0.894168	0.897569	1.24997	1.32471	1.29514	0.845925	0.944473	0.934851			539.2	1.16944	1.08084	1.10091	0.919681	0.916367	0.915434	1.06403	1.11197	1.02801	0.862546	0.869531	0.930448			78.4	0.0477	0.024	0.0259	0.0954	0.0706	0.0576	0.145	0.1299	0.13	0.1305	0.1318	0.1394			78.4	0.0226	-0.0189	0.0307	0.0444
539.4	1.53508	1.40224	1.48617	0.899987	0.898389	0.901849	1.253	1.32751	1.29796	0.850053	0.949273	0.939662			539.4	1.17342	1.08486	1.10479	0.923726	0.919803	0.919125	1.06698	1.11495	1.03046	0.866364	0.87365	0.934749			78.8	0.0466	0.0252	0.0264	0.094	0.0712	0.0585	0.145	0.1301	0.1296	0.1287	0.1311	0.1388			78.8	0.0215	-0.0184	0.0317	0.0436
539.6	1.53687	1.40422	1.48844	0.902134	0.900384	0.903972	1.25433	1.32882	1.29947	0.852231	0.951631	0.941905			539.6	1.17533	1.08666	1.10668	0.925693	0.921751	0.920994	1.06823	1.1165	1.03191	0.868359	0.875666	0.936869			79.2	0.0483	0.024	0.0268	0.096	0.0716	0.0583	0.1451	0.1285	0.131	0.1303	0.1306	0.1398			79.2	0.0229	-0.0193	0.0316	0.0451
539.8	1.54102	1.40811	1.49224	0.906343	0.904864	0.908233	1.25724	1.33206	1.30222	0.856351	0.95623	0.946201			539.8	1.17929	1.09012	1.11018	0.929325	0.925717	0.924909	1.07082	1.11963	1.03441	0.871701	0.879227	0.940608			79.6	0.0478	0.0247	0.0271	0.0952	0.0721	0.0586	0.1456	0.1283	0.1313	0.1297	0.1312	0.1391			79.6	0.0229	-0.018	0.0318	0.0436
540	1.54275	1.41015	1.49421	0.908477	0.907099	0.910475	1.2587	1.33348	1.30354	0.858326	0.958486	0.948438			540	1.18107	1.09193	1.11184	0.931203	0.927605	0.926868	1.07197	1.12113	1.03551	0.873435	0.881123	0.942412			80	0.0486	0.0256	0.0262	0.0962	0.0734	0.0584	0.1442	0.1309	0.131	0.1297	0.1308	0.14			80	0.0225	-0.0189	0.0322	0.0446
540.2	1.54647	1.41353	1.49845	0.912559	0.910809	0.914707	1.26118	1.33597	1.30596	0.862169	0.963147	0.952816			540.2	1.18457	1.09514	1.11511	0.934477	0.931214	0.930749	1.07465	1.12408	1.03801	0.876748	0.884728	0.945944			80.4	0.0482	0.0262	0.0273	0.0974	0.0731	0.0589	0.1446	0.13	0.1323	0.1292	0.1319	0.1408			80.4	0.0227	-0.0191	0.0324	0.0447
540.4	1.54868	1.41564	1.50088	0.915266	0.913631	0.917205	1.26281	1.3375	1.30771	0.864822	0.966228	0.955664			540.4	1.18661	1.09707	1.11729	0.93696	0.933554	0.933081	1.07623	1.12589	1.03963	0.879011	0.887316	0.948464			80.8	0.049	0.0246	0.0275	0.0967	0.0729	0.0596	0.1462	0.1297	0.1313	0.1302	0.1293	0.1395			80.8	0.0237	-0.0193	0.032	0.0457
540.6	1.55154	1.4184	1.50403	0.918652	0.91706	0.920509	1.26472	1.33932	1.30981	0.868094	0.969983	0.95902			540.6	1.18934	1.09968	1.11985	0.939926	0.936465	0.936021	1.07818	1.12814	1.04151	0.881688	0.890236	0.951588			81.2	0.0483	0.026	0.0264	0.0974	0.0738	0.0595	0.1449	0.1292	0.132	0.1297	0.1304	0.1392			81.2	0.0225	-0.0175	0.0323	0.0445
540.8	1.55383	1.42067	1.50617	0.921315	0.9198	0.922775	1.26629	1.34102	1.31137	0.870602	0.972857	0.961806			540.8	1.19123	1.1016	1.12185	0.942174	0.938993	0.938278	1.07966	1.12987	1.04287	0.883866	0.89236	0.954057			81.6	0.0497	0.0256	0.0273	0.0984	0.0729	0.0601	0.1475	0.1288	0.1314	0.1317	0.1326	0.1403			81.6	0.0238	-0.0179	0.0322	0.0462
541	1.55652	1.42335	1.50871	0.924522	0.923106	0.925871	1.268	1.34301	1.31301	0.87356	0.976259	0.965135			541	1.19377	1.10405	1.12423	0.944675	0.941926	0.941239	1.08172	1.13186	1.04462	0.886536	0.8951	0.956957			82	0.0484	0.0263	0.027	0.0974	0.0747	0.0609	0.1441	0.1306	0.1332	0.1289	0.1315	0.1402			82	0.0225	-0.0178	0.0329	0.0451
541.2	1.55828	1.42536	1.51091	0.927213	0.925762	0.928293	1.26955	1.34447	1.31454	0.875872	0.979137	0.967561			541.2	1.19585	1.10603	1.12614	0.946786	0.944045	0.943527	1.08323	1.13352	1.04601	0.888495	0.897255	0.95912			82.4	0.0496	0.0258	0.0271	0.0998	0.0753	0.0607	0.1457	0.1301	0.1327	0.1301	0.1308	0.1399			82.4	0.0233	-0.0185	0.0326	0.0462
541.4	1.5605	1.42785	1.51339	0.930536	0.929096	0.931331	1.27154	1.34607	1.31632	0.878672	0.982751	0.970557			541.4	1.19814	1.1083	1.12848	0.949518	0.946625	0.946175	1.08501	1.13541	1.04784	0.891082	0.899828	0.961815			82.8	0.0498	0.0261	0.0274	0.1	0.0756	0.0602	0.1451	0.1301	0.1331	0.1278	0.1301	0.1397			82.8	0.0228	-0.0176	0.0326	0.0446
541.6	1.56204	1.42974	1.5155	0.932994	0.93165	0.933483	1.27281	1.34746	1.31748	0.880985	0.98518	0.9732			541.6	1.1999	1.11025	1.13025	0.951544	0.948659	0.948102	1.08616	1.13676	1.04912	0.893043	0.901817	0.963725			83.2	0.0508	0.0259	0.027	0.0999	0.0754	0.0609	0.146	0.1296	0.1327	0.1312	0.1313	0.14			83.2	0.0241	-0.0183	0.0329	0.0467
541.8	1.56414	1.4321	1.51778	0.935781	0.934803	0.936204	1.27423	1.34903	1.31914	0.883626	0.988149	0.976345			541.8	1.20213	1.11267	1.13234	0.953966	0.951252	0.950553	1.08755	1.13832	1.05074	0.895317	0.904075	0.966379			83.6	0.0498	0.0257	0.028	0.1013	0.0759	0.0616	0.1454	0.129	0.1343	0.1303	0.1308	0.1405			83.6	0.0238	-0.018	0.0335	0.0461
542	1.56666	1.435	1.52061	0.93917	0.938353	0.939562	1.27597	1.35155	1.32066	0.887185	0.991703	0.979601			542	1.20462	1.11529	1.13496	0.95682	0.954328	0.953439	1.08938	1.14031	1.05252	0.898113	0.906705	0.969153			84	0.0489	0.027	0.0281	0.1003	0.0758	0.0617	0.1444	0.129	0.1336	0.1292	0.1315	0.1396			84	0.0235	-0.0177	0.034	0.0457
542.2	1.56805	1.43617	1.52205	0.94078	0.940025	0.941329	1.27676	1.35234	1.32161	0.888669	0.993543	0.981467			542.2	1.20614	1.1166	1.13645	0.958026	0.955784	0.954886	1.09027	1.14125	1.05322	0.899616	0.907941	0.970551			84.4	0.0504	0.0259	0.0271	0.1013	0.076	0.0612	0.1461	0.1301	0.1335	0.1294	0.1312	0.1401			84.4	0.0238	-0.0187	0.0329	0.0466
542.4	1.57081	1.43867	1.52425	0.943911	0.943533	0.944455	1.27842	1.35389	1.32341	0.892017	0.997165	0.984993			542.4	1.20898	1.11911	1.13898	0.960929	0.958732	0.957646	1.09168	1.14303	1.05471	0.901968	0.910581	0.973195			84.8	0.0509	0.0277	0.0279	0.102	0.0774	0.0616	0.1458	0.1319	0.1346	0.1293	0.1314	0.1401			84.8	0.0242	-0.0174	0.0342	0.0465
542.6	1.57193	1.43967	1.52538	0.945551	0.945353	0.945801	1.27903	1.35451	1.32422	0.89357	0.998996	0.986529			542.6	1.21029	1.12023	1.14011	0.96215	0.959958	0.958994	1.09248	1.14417	1.05545	0.903242	0.911939	0.97455			85.2	0.0512	0.0266	0.0287	0.1006	0.0764	0.0625	0.1457	0.1302	0.1334	0.129	0.131	0.1396			85.2	0.0236	-0.017	0.0332	0.0469
542.8	1.57413	1.44206	1.52776	0.948805	0.948733	0.948804	1.28023	1.35598	1.32537	0.896573	1.00229	0.989523			542.8	1.21244	1.12254	1.14268	0.964794	0.962758	0.961725	1.09392	1.14602	1.0571	0.905616	0.91441	0.977274			85.6	0.0504	0.0271	0.0283	0.1027	0.0771	0.0628	0.1463	0.1296	0.1351	0.1297	0.1302	0.1397			85.6	0.0246	-0.0178	0.0346	0.0471
543	1.57507	1.44321	1.52895	0.950435	0.950351	0.950052	1.28089	1.35671	1.32578	0.898017	1.00407	0.991103			543	1.2134	1.1236	1.14376	0.966172	0.964221	0.96309	1.09446	1.14692	1.05768	0.906826	0.915637	0.978364			86	0.0513	0.0269	0.0278	0.1012	0.0785	0.0619	0.145	0.1304	0.1347	0.1286	0.132	0.1405			86	0.0237	-0.0168	0.0335	0.0471
543.2	1.5767	1.44545	1.53122	0.953483	0.953036	0.953132	1.28199	1.35769	1.32662	0.900685	1.00722	0.99436			543.2	1.21516	1.12577	1.14563	0.968555	0.966672	0.965605	1.09573	1.14834	1.05899	0.909444	0.918025	0.981089			86.4	0.0514	0.0273	0.0286	0.1034	0.0781	0.0629	0.1464	0.1305	0.1353	0.13	0.1298	0.1408			86.4	0.0255	-0.0184	0.035	0.0472
543.4	1.57769	1.4466	1.53258	0.955259	0.955008	0.955041	1.28272	1.35859	1.32763	0.902319	1.00923	0.996179			543.4	1.21633	1.12719	1.14706	0.970186	0.968458	0.967173	1.09637	1.14917	1.06003	0.910665	0.919517	0.982756			86.8	0.0508	0.0276	0.0289	0.1026	0.0785	0.063	0.1451	0.1297	0.1356	0.1296	0.1309	0.1411			86.8	0.0239	-0.0175	0.0351	0.047
543.6	1.57888	1.44798	1.53409	0.957764	0.957589	0.957484	1.28348	1.35962	1.32866	0.904445	1.01177	0.99844			543.6	1.2178	1.12896	1.14903	0.972143	0.970389	0.969161	1.09719	1.15039	1.06116	0.912348	0.921482	0.984776			87.2	0.0525	0.0272	0.0284	0.1049	0.0788	0.0628	0.1475	0.1302	0.1356	0.1306	0.1295	0.1404			87.2	0.0259	-0.0178	0.0347	0.0484
543.8	1.57994	1.44926	1.53539	0.959619	0.959468	0.959492	1.28369	1.36037	1.32929	0.906118	1.01369	1.00023			543.8	1.21904	1.13044	1.15038	0.973562	0.971892	0.970725	1.09813	1.15115	1.06206	0.913763	0.922526	0.986177			87.6	0.0521	0.0264	0.0286	0.1046	0.0786	0.0647	0.1468	0.1294	0.1365	0.1302	0.1307	0.1411			87.6	0.0254	-0.0174	0.035	0.0491
544	1.58088	1.4506	1.53701	0.96186	0.96174	0.961979	1.28421	1.36116	1.33005	0.908166	1.01601	1.00268			544	1.22046	1.13193	1.15206	0.975294	0.973716	0.972633	1.09894	1.15217	1.06306	0.915448	0.924164	0.987815			88	0.0522	0.0284	0.0285	0.1042	0.0788	0.0637	0.1475	0.1299	0.1358	0.1306	0.1305	0.1412			88	0.0254	-0.0168	0.0356	0.0482
544.2	1.58156	1.45141	1.53823	0.963472	0.963583	0.963905	1.28461	1.36174	1.33043	0.909711	1.01784	1.00443			544.2	1.22161	1.13296	1.15334	0.976675	0.975098	0.974098	1.0994	1.15294	1.06368	0.916606	0.925433	0.989176			88.4	0.0522	0.0279	0.0294	0.1053	0.0812	0.0645	0.1453	0.1312	0.1368	0.1292	0.1311	0.1417			88.4	0.0252	-0.0178	0.0356	0.0485
544.4	1.58235	1.45237	1.53972	0.965588	0.965784	0.966157	1.28516	1.3622	1.33098	0.911489	1.0203	1.00646			544.4	1.22284	1.13423	1.15474	0.978571	0.976897	0.975898	1.09991	1.15374	1.06456	0.918176	0.926989	0.99101			88.8	0.0525	0.0288	0.028	0.106	0.0802	0.0637	0.1452	0.13	0.1351	0.1294	0.1307	0.14			88.8	0.0258	-0.0171	0.0355	0.0486
544.6	1.58322	1.45328	1.54073	0.967033	0.967361	0.967704	1.28554	1.36274	1.33121	0.913015	1.02179	1.00807			544.6	1.22388	1.13518	1.15578	0.979835	0.978357	0.977332	1.10045	1.15428	1.06497	0.919273	0.928	0.992194			89.2	0.0528	0.0288	0.0298	0.1059	0.0812	0.065	0.1464	0.1311	0.1382	0.1303	0.1319	0.1416			89.2	0.0258	-0.0161	0.0359	0.0482
544.8	1.58413	1.45443	1.54194	0.968877	0.969208	0.969674	1.28595	1.36352	1.33161	0.914901	1.02367	1.01005			544.8	1.22508	1.13646	1.15696	0.981421	0.980047	0.979211	1.101	1.15491	1.06531	0.920582	0.929335	0.993486			89.6	0.0527	0.0277	0.029	0.1057	0.0807	0.0629	0.1461	0.1292	0.1367	0.1275	0.1311	0.1401			89.6	0.0258	-0.0163	0.0343	0.0474
545	1.58496	1.45541	1.54305	0.971246	0.971362	0.97204	1.28617	1.36386	1.33225	0.916765	1.02612	1.0121			545	1.22648	1.13766	1.1585	0.982921	0.981775	0.981168	1.10164	1.15574	1.06602	0.921922	0.930957	0.995126			90	0.0521	0.029	0.0291	0.1063	0.0812	0.0645	0.1456	0.1315	0.1373	0.1297	0.131	0.1406			90	0.0251	-0.0163	0.036	0.0483
545.2	1.58538	1.45567	1.54378	0.972485	0.972416	0.973208	1.28616	1.36404	1.33231	0.917694	1.02738	1.01307			545.2	1.22692	1.13807	1.15926	0.983815	0.982759	0.982066	1.10197	1.15626	1.0662	0.922751	0.931907	0.995799			90.4	0.0538	0.0283	0.0289	0.1057	0.0824	0.0646	0.1462	0.1315	0.1367	0.1298	0.131	0.1406			90.4	0.0259	-0.0166	0.0353	0.0489
545.4	1.5863	1.45634	1.54462	0.974883	0.974914	0.975602	1.28622	1.3639	1.33265	0.919262	1.02995	1.01528			545.4	1.22841	1.13945	1.16039	0.985575	0.984355	0.983965	1.10219	1.15692	1.06679	0.924238	0.933482	0.99747			90.8	0.0532	0.0302	0.0288	0.1075	0.0833	0.0656	0.1465	0.1311	0.1378	0.1307	0.1318	0.1407			90.8	0.026	-0.0155	0.0364	0.0495
545.6	1.58635	1.45664	1.54506	0.975929	0.975918	0.976559	1.28639	1.36395	1.33258	0.920144	1.03091	1.01625			545.6	1.22876	1.13982	1.16101	0.986367	0.985054	0.984811	1.10228	1.1572	1.06716	0.924853	0.934414	0.998272			91.2	0.0536	0.0296	0.0304	0.1073	0.0834	0.0666	0.1459	0.1302	0.1385	0.1305	0.1319	0.1412			91.2	0.0258	-0.0171	0.037	0.0499
545.8	1.58642	1.4572	1.54573	0.977962	0.978026	0.978642	1.28628	1.36422	1.33236	0.921754	1.03258	1.01807			545.8	1.22944	1.14089	1.16221	0.987771	0.986782	0.986219	1.1031	1.15772	1.06737	0.926422	0.935544	0.999619			91.6	0.0532	0.0295	0.029	0.1083	0.0841	0.0654	0.1456	0.1306	0.1384	0.1299	0.1312	0.1399			91.6	0.0252	-0.0159	0.0354	0.049
546	1.58655	1.45768	1.54615	0.979221	0.979365	0.979995	1.28624	1.36426	1.33227	0.922728	1.03372	1.01935			546	1.22991	1.14139	1.1629	0.988593	0.987737	0.987202	1.1031	1.15828	1.0677	0.927346	0.936464	1.0005			92	0.0541	0.0283	0.0287	0.1088	0.0843	0.0656	0.1468	0.1302	0.1382	0.1304	0.1323	0.1406			92	0.0264	-0.0161	0.0347	0.0491
546.2	1.58669	1.45798	1.5467	0.980689	0.981043	0.981767	1.28611	1.36424	1.33192	0.924002	1.0353	1.02096			546.2	1.23052	1.14207	1.1637	0.989553	0.988989	0.9884	1.10323	1.15861	1.06792	0.928345	0.937481	1.00152			92.4	0.0531	0.0291	0.0294	0.1074	0.0841	0.0656	0.146	0.1295	0.1386	0.13	0.1305	0.1414			92.4	0.0267	-0.0162	0.0366	0.0496
546.4	1.58674	1.45826	1.54697	0.981861	0.982465	0.983289	1.28606	1.36414	1.33198	0.924975	1.03636	1.02205			546.4	1.23107	1.14251	1.16424	0.99023	0.989858	0.989422	1.10358	1.15872	1.06801	0.928949	0.938135	1.00222			92.8	0.0536	0.0299	0.0289	0.1085	0.0841	0.0666	0.1462	0.1306	0.1379	0.1293	0.1312	0.141			92.8	0.0261	-0.0163	0.0365	0.0495
546.6	1.58665	1.4586	1.54721	0.983289	0.983906	0.98475	1.28598	1.36378	1.3319	0.926161	1.03788	1.02319			546.6	1.23142	1.14312	1.1651	0.991183	0.991145	0.990589	1.10383	1.15897	1.06794	0.929664	0.939081	1.00286			93.2	0.0544	0.0299	0.0296	0.1107	0.0849	0.067	0.1478	0.1304	0.1388	0.1312	0.1319	0.1401			93.2	0.0263	-0.0159	0.0372	0.0502
546.8	1.58678	1.45873	1.54722	0.984628	0.985043	0.985869	1.28566	1.36358	1.33145	0.927156	1.03901	1.02432			546.8	1.23202	1.14352	1.16561	0.99201	0.991782	0.991487	1.10397	1.15906	1.06783	0.930345	0.939781	1.00338			93.6	0.0549	0.0309	0.03	0.11	0.0847	0.0676	0.1475	0.1316	0.1389	0.1316	0.1314	0.1409			93.6	0.0262	-0.0153	0.0371	0.0503
547	1.58681	1.45873	1.54717	0.986167	0.986589	0.986997	1.28543	1.36334	1.33109	0.928262	1.04033	1.02565			547	1.23257	1.14391	1.16607	0.992876	0.992907	0.992424	1.10412	1.15902	1.06779	0.931015	0.940513	1.00407			94	0.0553	0.0314	0.0292	0.1114	0.0863	0.067	0.146	0.132	0.1394	0.1304	0.1323	0.1413			94	0.0271	-0.0148	0.0373	0.0508
547.2	1.58655	1.45837	1.547	0.987122	0.987654	0.987894	1.28516	1.36296	1.33053	0.928988	1.04131	1.02656			547.2	1.23281	1.14424	1.16624	0.993596	0.993684	0.992981	1.10384	1.15896	1.06752	0.93135	0.941107	1.00464			94.4	0.0545	0.0306	0.0303	0.1111	0.0858	0.0682	0.1469	0.1314	0.1394	0.1295	0.1314	0.1421			94.4	0.0268	-0.0149	0.0375	0.0502
547.4	1.58635	1.4581	1.54689	0.988354	0.988886	0.988987	1.28479	1.36232	1.33005	0.930012	1.04251	1.02739			547.4	1.233	1.14475	1.16654	0.994345	0.994466	0.993881	1.10372	1.15882	1.06742	0.931745	0.941744	1.00534			94.8	0.0555	0.0313	0.0288	0.1105	0.0859	0.0669	0.146	0.1313	0.1383	0.1305	0.1319	0.1405			94.8	0.0281	-0.0164	0.0376	0.051
547.6	1.58535	1.45776	1.54686	0.989773	0.990064	0.99022	1.28407	1.36149	1.32949	0.930986	1.04355	1.02857			547.6	1.23329	1.1453	1.16681	0.995089	0.995594	0.994931	1.10369	1.15865	1.06716	0.932353	0.942535	1.00566			95.2	0.055	0.0308	0.03	0.1117	0.0875	0.0676	0.1462	0.1308	0.1386	0.1314	0.1318	0.1406			95.2	0.0269	-0.0151	0.0373	0.0504
547.8	1.58513	1.45751	1.54669	0.990194	0.990643	0.990878	1.28367	1.36136	1.32927	0.931465	1.04395	1.02929			547.8	1.23342	1.14536	1.1669	0.995533	0.995788	0.995154	1.10348	1.15846	1.06692	0.932632	0.942798	1.00582			95.6	0.0546	0.0312	0.0307	0.1109	0.0874	0.0681	0.1463	0.1307	0.1394	0.1296	0.1328	0.1415			95.6	0.0271	-0.0158	0.0385	0.0504
548	1.58415	1.45709	1.54579	0.991545	0.991914	0.992269	1.28273	1.36047	1.32837	0.932418	1.04527	1.03066			548	1.23353	1.14582	1.16698	0.996402	0.996429	0.995842	1.10286	1.1582	1.0666	0.933187	0.9436	1.00642			96	0.0546	0.0319	0.0309	0.1133	0.0873	0.0682	0.1456	0.131	0.1389	0.1304	0.1303	0.1423			96	0.0272	-0.0151	0.0387	0.0508
548.2	1.58364	1.45676	1.5455	0.992146	0.992594	0.992682	1.28226	1.36016	1.32777	0.932753	1.04577	1.03117			548.2	1.23365	1.1458	1.16707	0.996572	0.996769	0.996168	1.10281	1.15822	1.06665	0.93341	0.943924	1.00682			96.4	0.0553	0.0302	0.0301	0.1121	0.0881	0.0674	0.1467	0.131	0.1404	0.1301	0.131	0.1408			96.4	0.0266	-0.0149	0.0369	0.0504
548.4	1.58251	1.4557	1.5448	0.993317	0.993534	0.993861	1.28147	1.35944	1.32676	0.933666	1.04659	1.03201			548.4	1.23336	1.14568	1.1671	0.997176	0.997778	0.997102	1.10245	1.1576	1.06606	0.933773	0.944235	1.00738			96.8	0.0549	0.032	0.0302	0.1122	0.0887	0.0679	0.1461	0.1322	0.1397	0.13	0.1313	0.14			96.8	0.0266	-0.0146	0.038	0.0505
548.6	1.58168	1.45548	1.54431	0.993854	0.994194	0.994623	1.2812	1.35878	1.32622	0.934272	1.04698	1.03244			548.6	1.23337	1.14573	1.16726	0.997504	0.998237	0.997611	1.10209	1.15741	1.0656	0.933882	0.944467	1.0074			97.2	0.0562	0.0311	0.0305	0.1124	0.0887	0.0691	0.1471	0.1318	0.1405	0.1301	0.1317	0.1408			97.2	0.0272	-0.0153	0.0381	0.0515
548.8	1.58086	1.45501	1.54374	0.99446	0.994779	0.995421	1.2805	1.35794	1.32555	0.934788	1.04744	1.03303			548.8	1.23296	1.14583	1.16742	0.997625	0.998819	0.998104	1.10156	1.15709	1.06519	0.933933	0.944931	1.00774			97.6	0.0566	0.0319	0.0299	0.114	0.0895	0.0686	0.1469	0.1318	0.1402	0.1307	0.1314	0.1411			97.6	0.028	-0.0145	0.0385	0.0517
549	1.57997	1.4545	1.54347	0.99503	0.995325	0.996014	1.27982	1.35719	1.32483	0.935232	1.04799	1.03342			549	1.23265	1.14595	1.16744	0.997907	0.999131	0.998554	1.10102	1.15679	1.06477	0.93396	0.945143	1.00774			98	0.056	0.0314	0.0313	0.1135	0.088	0.0701	0.1462	0.1311	0.1402	0.1295	0.1316	0.1424			98	0.0277	-0.015	0.0395	0.0508
549.2	1.57862	1.45378	1.54288	0.995852	0.995931	0.996821	1.27885	1.35615	1.32396	0.935755	1.04869	1.03366			549.2	1.23248	1.14608	1.16713	0.998401	0.999293	0.998934	1.10024	1.1562	1.06414	0.933991	0.94531	1.00741			98.4	0.0562	0.0325	0.031	0.1141	0.0898	0.0688	0.147	0.1324	0.1389	0.1298	0.133	0.1407			98.4	0.0271	-0.0147	0.0388	0.0513
549.4	1.57758	1.45288	1.54209	0.996391	0.996295	0.997294	1.27799	1.35507	1.32312	0.936106	1.0491	1.03388			549.4	1.23212	1.14593	1.16676	0.998757	0.999641	0.999269	1.09983	1.15556	1.06344	0.933862	0.945232	1.00734			98.8	0.0549	0.0313	0.0313	0.1131	0.0895	0.0693	0.1458	0.1313	0.14	0.1283	0.132	0.1414			98.8	0.0263	-0.0146	0.0378	0.051
549.6	1.57627	1.45175	1.541	0.99698	0.996748	0.997923	1.27702	1.35398	1.32235	0.936493	1.0494	1.03402			549.6	1.23167	1.14576	1.16649	0.999229	0.999906	0.999645	1.09898	1.15498	1.06273	0.933817	0.945055	1.00708			99.2	0.0574	0.0315	0.031	0.114	0.09	0.0708	0.1479	0.1319	0.1409	0.1312	0.1319	0.1426			99.2	0.0276	-0.0147	0.0387	0.0518
549.8	1.57535	1.45085	1.54023	0.99732	0.997283	0.99813	1.27591	1.35304	1.32146	0.936601	1.04976	1.03418			549.8	1.23125	1.14556	1.16639	0.99963	1	0.999676	1.09809	1.15449	1.0621	0.933601	0.94487	1.00697			99.6	0.0568	0.0317	0.0313	0.1149	0.0893	0.0696	0.1465	0.1307	0.1407	0.1298	0.1309	0.1411			99.6	0.0278	-0.0147	0.0386	0.0521
550	1.57414	1.44945	1.53906	0.997775	0.997922	0.998665	1.27476	1.35197	1.32026	0.937002	1.04999	1.0345			550	1.23079	1.1452	1.16605	0.999981	0.999753	0.999725	1.09696	1.15362	1.06138	0.933403	0.944642	1.00687			100	0.0569	0.0327	0.0308	0.1153	0.0905	0.0701	0.1453	0.1311	0.1404	0.1308	0.1314	0.1419			100	0.0278	-0.0149	0.0396	0.0521
550.2	1.57224	1.44799	1.53773	0.998118	0.998306	0.998901	1.27339	1.35029	1.31902	0.936933	1.04984	1.03458			550.2	1.22969	1.14474	1.16534	0.999803	0.999764	0.999829	1.09563	1.15275	1.06027	0.933109	0.944431	1.00693			100.4	0.0568	0.0334	0.031	0.1161	0.0912	0.0704	0.1459	0.131	0.1406	0.1298	0.1322	0.1415			100.4	0.0278	-0.0141	0.0397	0.0521
550.4	1.57104	1.44714	1.53698	0.998243	0.998366	0.99914	1.27231	1.34951	1.3182	0.937115	1.04962	1.03472			550.4	1.22943	1.1445	1.16493	1	0.999733	0.999868	1.09509	1.15215	1.05966	0.933115	0.944321	1.00695			100.8	0.0572	0.033	0.0305	0.1166	0.0909	0.0699	0.1465	0.1315	0.1409	0.1307	0.133	0.1409			100.8	0.0285	-0.0127	0.0393	0.0529
550.6	1.56895	1.44556	1.53554	0.998651	0.998434	0.999559	1.27084	1.34794	1.3165	0.936971	1.04944	1.03457			550.6	1.22855	1.14395	1.16428	0.999828	0.99942	1	1.09384	1.15114	1.05872	0.932927	0.944152	1.00649			101.2	0.0577	0.0324	0.0324	0.1155	0.0919	0.0717	0.1471	0.1307	0.1413	0.1296	0.1304	0.1422			101.2	0.0279	-0.0149	0.04	0.0525
550.8	1.5679	1.44463	1.53488	0.998869	0.998717	0.999652	1.26987	1.34714	1.31558	0.936889	1.04936	1.03453			550.8	1.22817	1.14369	1.16396	0.99968	0.999543	0.999986	1.09314	1.15023	1.05823	0.932764	0.943801	1.00626			101.6	0.0575	0.0333	0.031	0.1152	0.0915	0.07	0.1463	0.1322	0.1414	0.1301	0.1321	0.1412			101.6	0.0282	-0.014	0.0394	0.0525
551	1.56611	1.44276	1.53348	0.999158	0.999231	0.999745	1.26861	1.34529	1.31399	0.936779	1.04934	1.03437			551	1.22724	1.14296	1.16348	0.999508	0.999117	0.999938	1.09192	1.14905	1.05732	0.93227	0.943464	1.00571			102	0.0584	0.0324	0.0315	0.1163	0.0911	0.0715	0.1474	0.1305	0.141	0.13	0.1303	0.1418			102	0.0288	-0.0155	0.0403	0.0537
551.2	1.56485	1.44162	1.53234	0.999447	0.999392	0.999681	1.26771	1.34414	1.31302	0.936673	1.04915	1.03427			551.2	1.22647	1.14254	1.16288	0.999175	0.999074	0.99994	1.09101	1.1483	1.05657	0.931878	0.942974	1.00535			102.4	0.0572	0.034	0.0309	0.1152	0.0912	0.0716	0.1465	0.1328	0.1411	0.1294	0.1324	0.1408			102.4	0.0284	-0.0136	0.0399	0.0529
551.4	1.56319	1.43981	1.53107	0.999655	0.999714	0.999732	1.26626	1.34274	1.31186	0.936324	1.04901	1.0337			551.4	1.22556	1.14167	1.16204	0.998907	0.998959	0.999938	1.08994	1.14723	1.05564	0.931262	0.942437	1.00477			102.8	0.0595	0.034	0.0311	0.119	0.0928	0.0712	0.1484	0.1321	0.1412	0.1317	0.1315	0.1418			102.8	0.0294	-0.0138	0.0409	0.054
551.6	1.56182	1.43844	1.52966	0.999807	0.999735	0.999881	1.26503	1.34153	1.31078	0.935955	1.04882	1.03366			551.6	1.22485	1.14138	1.16132	0.998869	0.998828	0.999604	1.08902	1.14634	1.05468	0.930889	0.94202	1.00436			103.2	0.0569	0.0339	0.0322	0.1171	0.0932	0.072	0.1473	0.1313	0.1417	0.1308	0.1319	0.1414			103.2	0.0278	-0.0135	0.0406	0.0517
551.8	1.56031	1.43685	1.528	1	0.999877	1	1.26341	1.33992	1.30953	0.935544	1.04857	1.03329			551.8	1.22389	1.14087	1.16051	0.998744	0.998601	0.999199	1.08777	1.14523	1.05351	0.930467	0.94141	1.00382			103.6	0.059	0.0337	0.0316	0.1166	0.0941	0.0713	0.1458	0.1308	0.1414	0.1307	0.132	0.1413			103.6	0.0291	-0.0142	0.0402	0.0532
552	1.55889	1.43525	1.52676	0.999969	0.999956	0.999866	1.26203	1.33846	1.30815	0.935264	1.0481	1.03302			552	1.22305	1.14039	1.15963	0.998597	0.998146	0.998868	1.08668	1.14405	1.05266	0.929787	0.940784	1.0032			104	0.0583	0.0342	0.0326	0.1175	0.0938	0.0732	0.1465	0.1313	0.1418	0.1305	0.1317	0.1424			104	0.0277	-0.0142	0.0416	0.0533
552.2	1.55695	1.43328	1.52502	0.999773	1	0.999815	1.26034	1.33671	1.30635	0.934941	1.04754	1.03277			552.2	1.22222	1.13941	1.15855	0.998639	0.997565	0.998427	1.08538	1.14267	1.05152	0.929046	0.939865	1.00236			104.4	0.0582	0.0346	0.0316	0.117	0.0929	0.0716	0.1452	0.1324	0.1408	0.1298	0.1314	0.1419			104.4	0.028	-0.0138	0.0412	0.0529
552.4	1.55563	1.43188	1.52354	0.999639	0.999825	0.999687	1.25904	1.33548	1.30519	0.934534	1.04698	1.03238			552.4	1.22149	1.13866	1.1576	0.998306	0.997141	0.998038	1.08417	1.14156	1.05074	0.928387	0.93927	1.0019			104.8	0.0595	0.035	0.032	0.1198	0.0957	0.0724	0.1481	0.1318	0.1424	0.1307	0.1319	0.1418			104.8	0.0294	-0.0138	0.0417	0.0547
552.6	1.55396	1.42982	1.52176	0.999444	0.99954	0.99935	1.25738	1.33402	1.30377	0.933903	1.0465	1.03196			552.6	1.22042	1.13762	1.15669	0.997473	0.99668	0.997659	1.0828	1.1403	1.04957	0.927674	0.938436	1.00146			105.2	0.0583	0.0364	0.0313	0.1188	0.0958	0.0731	0.1459	0.1332	0.1425	0.1294	0.1339	0.1418			105.2	0.0281	-0.0125	0.0415	0.0527
552.8	1.55164	1.42775	1.51936	0.999276	0.999443	0.998992	1.25553	1.33271	1.30186	0.933131	1.04589	1.03118			552.8	1.21917	1.13665	1.15557	0.99673	0.995942	0.997063	1.08105	1.13874	1.04855	0.92647	0.937363	1.00036			105.6	0.0602	0.0338	0.0321	0.1191	0.0955	0.0729	0.1472	0.1327	0.1429	0.1305	0.1317	0.1426			105.6	0.0279	-0.0127	0.0407	0.0544
553	1.55028	1.42662	1.5183	0.999131	0.999198	0.99867	1.25456	1.33177	1.30086	0.932734	1.0457	1.03079			553	1.21836	1.13598	1.15493	0.99631	0.99564	0.996733	1.08016	1.13794	1.048	0.925916	0.937017	1.00002			106	0.0589	0.0352	0.0317	0.1183	0.0953	0.0724	0.146	0.1325	0.1422	0.1297	0.1317	0.1412			106	0.0289	-0.0134	0.0414	0.0535
553.2	1.5474	1.42423	1.51594	0.998649	0.998388	0.998287	1.25283	1.32961	1.29908	0.931983	1.0445	1.02969			553.2	1.21699	1.13483	1.15336	0.995279	0.995217	0.996441	1.07869	1.13624	1.04702	0.92477	0.936349	0.998788			106.4	0.0605	0.0347	0.0323	0.1199	0.0946	0.0726	0.1483	0.1319	0.1417	0.1317	0.1322	0.142			106.4	0.0298	-0.0131	0.0413	0.0553
553.4	1.54539	1.4225	1.51447	0.998572	0.998156	0.997921	1.25138	1.32816	1.29772	0.931428	1.04401	1.02906			553.4	1.21602	1.13396	1.15242	0.994952	0.995013	0.995885	1.0777	1.13537	1.04625	0.923885	0.935691	0.997727			106.8	0.0598	0.0344	0.032	0.1188	0.0952	0.0732	0.1469	0.1322	0.1414	0.1297	0.131	0.141			106.8	0.0284	-0.0133	0.0407	0.0535
553.6	1.54302	1.42044	1.51248	0.998179	0.998003	0.997638	1.24967	1.32648	1.29629	0.930746	1.04333	1.02834			553.6	1.21477	1.1327	1.15136	0.994357	0.99438	0.995231	1.07628	1.13416	1.04522	0.922902	0.934601	0.996397			107.2	0.0601	0.0361	0.0316	0.1203	0.0964	0.0732	0.1471	0.1325	0.1418	0.1311	0.1317	0.1406			107.2	0.0287	-0.0121	0.0417	0.0549
553.8	1.5413	1.41875	1.51075	0.997849	0.997612	0.996993	1.24848	1.3251	1.29498	0.93	1.04285	1.02763			553.8	1.2135	1.13175	1.15041	0.993661	0.993991	0.994595	1.07513	1.13301	1.04448	0.9218	0.933684	0.99511			107.6	0.0602	0.0352	0.0332	0.1201	0.0967	0.0747	0.1465	0.132	0.1431	0.1302	0.1315	0.1421			107.6	0.0305	-0.0127	0.0421	0.0549
554	1.53885	1.4167	1.50859	0.997214	0.997254	0.996452	1.24679	1.32338	1.29359	0.929317	1.04189	1.0266			554	1.21207	1.13042	1.1495	0.992875	0.993349	0.994056	1.07403	1.13167	1.04339	0.920533	0.932575	0.993881			108	0.0601	0.0363	0.032	0.1204	0.0981	0.0739	0.1479	0.1325	0.1415	0.1313	0.1317	0.1417			108	0.0307	-0.0131	0.0419	0.0555
554.2	1.5369	1.41534	1.50626	0.996758	0.996562	0.99609	1.24556	1.32197	1.29222	0.928549	1.04132	1.02571			554.2	1.21086	1.12944	1.14835	0.992266	0.992647	0.993474	1.07288	1.13062	1.04227	0.919679	0.93172	0.992705			108.4	0.061	0.0352	0.0332	0.1211	0.0961	0.0746	0.1462	0.1323	0.1432	0.1305	0.1315	0.143			108.4	0.0288	-0.0131	0.0431	0.054
554.4	1.53444	1.41348	1.50376	0.996186	0.995785	0.995312	1.24379	1.32018	1.29078	0.927552	1.04032	1.02456			554.4	1.2093	1.12812	1.14675	0.9915	0.991806	0.992542	1.07155	1.12903	1.04099	0.918624	0.930612	0.991507			108.8	0.0615	0.0358	0.0325	0.1212	0.097	0.074	0.1477	0.1324	0.1433	0.1311	0.1313	0.1411			108.8	0.0301	-0.013	0.0425	0.0558
554.6	1.53229	1.41136	1.502	0.995701	0.99519	0.994774	1.24238	1.31853	1.28934	0.926784	1.03954	1.02359			554.6	1.208	1.12688	1.1459	0.990841	0.991202	0.991736	1.07041	1.12773	1.04001	0.917564	0.929728	0.99021			109.2	0.0609	0.0354	0.0333	0.1211	0.0968	0.074	0.1468	0.1316	0.1424	0.13	0.1311	0.1421			109.2	0.0291	-0.0124	0.0425	0.0547
554.8	1.52978	1.40886	1.49949	0.995045	0.994269	0.994089	1.24055	1.31641	1.28763	0.925867	1.03838	1.02245			554.8	1.20616	1.12545	1.14486	0.989856	0.990381	0.990827	1.06899	1.12614	1.03872	0.916111	0.928563	0.988825			109.6	0.0596	0.0367	0.0321	0.1215	0.099	0.0743	0.1461	0.1327	0.1424	0.1298	0.1322	0.1408			109.6	0.0291	-0.0122	0.0423	0.0547
555	1.52655	1.4061	1.4963	0.993858	0.993652	0.993049	1.2383	1.3139	1.28534	0.924676	1.03679	1.02074			555	1.2041	1.12356	1.14336	0.988419	0.989102	0.989624	1.0669	1.12447	1.03725	0.914424	0.926878	0.987087			110	0.0616	0.0365	0.0329	0.1232	0.0989	0.0753	0.1487	0.1328	0.1435	0.1305	0.1319	0.1421			110	0.0306	-0.0124	0.0433	0.0557
555.2	1.52462	1.40467	1.49464	0.993317	0.993166	0.992426	1.23732	1.31256	1.2841	0.924074	1.03608	1.02012			555.2	1.20312	1.12262	1.1424	0.987856	0.988437	0.989048	1.06586	1.12347	1.03624	0.913499	0.92616	0.986187			110.4	0.0606	0.0358	0.0328	0.1201	0.0979	0.0763	0.1464	0.1317	0.1427	0.1299	0.132	0.1419			110.4	0.0297	-0.0134	0.0432	0.0543
555.4	1.52097	1.40168	1.49158	0.992457	0.991954	0.991015	1.23534	1.31031	1.28225	0.922682	1.03473	1.01846			555.4	1.20079	1.12037	1.14072	0.986354	0.987343	0.987558	1.06428	1.12179	1.03472	0.912055	0.924352	0.984459			110.8	0.0614	0.0367	0.0346	0.1212	0.0993	0.0756	0.1462	0.133	0.1431	0.1296	0.1317	0.1427			110.8	0.0298	-0.0123	0.0437	0.0548
555.6	1.51849	1.3994	1.48929	0.991775	0.991229	0.990145	1.234	1.30909	1.28112	0.92171	1.03366	1.01711			555.6	1.19938	1.11914	1.13951	0.985081	0.98654	0.986659	1.06317	1.1204	1.0336	0.91075	0.92322	0.983136			111.2	0.0623	0.0362	0.0329	0.1219	0.0993	0.0758	0.1459	0.1321	0.1431	0.1315	0.1324	0.1423			111.2	0.03	-0.0119	0.0433	0.0558
555.8	1.51567	1.39655	1.48635	0.990883	0.990363	0.989153	1.23213	1.30731	1.27999	0.920361	1.03223	1.01536			555.8	1.19732	1.11723	1.13801	0.983997	0.985428	0.98557	1.06178	1.1189	1.03223	0.909073	0.921655	0.981351			111.6	0.0617	0.0374	0.0343	0.1241	0.0995	0.076	0.1464	0.1324	0.144	0.1308	0.1321	0.1431			111.6	0.0302	-0.0115	0.0443	0.0567
556	1.51346	1.39454	1.48392	0.989928	0.989847	0.988306	1.23055	1.30572	1.27894	0.919365	1.03091	1.01416			556	1.1958	1.11587	1.1366	0.983201	0.984518	0.984761	1.06059	1.1177	1.03138	0.907617	0.920544	0.97989			112	0.0621	0.0362	0.0333	0.122	0.0987	0.0765	0.1469	0.1312	0.1435	0.13	0.131	0.1427			112	0.0302	-0.012	0.0436	0.0564
556.2	1.51028	1.39192	1.48094	0.988907	0.988898	0.987384	1.22878	1.30381	1.27766	0.917891	1.02931	1.01263			556.2	1.1937	1.11395	1.13462	0.982021	0.983469	0.983594	1.05904	1.11617	1.03	0.90586	0.919289	0.978395			112.4	0.062	0.037	0.033	0.1229	0.1007	0.0762	0.1477	0.1333	0.143	0.1304	0.1318	0.1418			112.4	0.031	-0.0124	0.0435	0.0559
556.4	1.50776	1.38988	1.47845	0.988144	0.988402	0.986527	1.22747	1.30238	1.27648	0.916611	1.02826	1.01154			556.4	1.19217	1.11254	1.13324	0.980834	0.982569	0.982418	1.05796	1.11498	1.02877	0.904502	0.918124	0.976783			112.8	0.0616	0.0378	0.0327	0.1233	0.1004	0.0761	0.1464	0.1336	0.1432	0.1307	0.1322	0.1415			112.8	0.0298	-0.0122	0.0442	0.0562
556.6	1.5047	1.38713	1.47522	0.98719	0.987668	0.985387	1.22589	1.30069	1.275	0.914995	1.02682	1.01003			556.6	1.19014	1.11074	1.13137	0.979517	0.981398	0.980982	1.05661	1.11337	1.02719	0.902738	0.91645	0.9751			113.2	0.0611	0.0377	0.033	0.1224	0.0991	0.0772	0.1466	0.1327	0.144	0.1295	0.1314	0.1429			113.2	0.0297	-0.0116	0.0448	0.0545
556.8	1.50229	1.38486	1.47257	0.986204	0.986758	0.9844	1.22455	1.29934	1.27366	0.913761	1.02523	1.00835			556.8	1.18856	1.10914	1.13006	0.978339	0.980415	0.979878	1.05541	1.11204	1.02598	0.901423	0.914792	0.973701			113.6	0.0622	0.037	0.0332	0.123	0.1003	0.0766	0.1473	0.1316	0.1427	0.1306	0.1322	0.1432			113.6	0.0302	-0.013	0.0442	0.0564
557	1.49907	1.38187	1.46934	0.985035	0.985597	0.982981	1.22273	1.29759	1.27221	0.912224	1.0235	1.00643			557	1.18641	1.10731	1.12809	0.976878	0.979284	0.978385	1.05395	1.11032	1.02468	0.899685	0.912874	0.971965			114	0.0626	0.0375	0.0343	0.1234	0.1009	0.0777	0.1466	0.132	0.1439	0.1306	0.1307	0.1425			114	0.0303	-0.0117	0.0448	0.0568
557.2	1.495	1.37836	1.46571	0.983652	0.984355	0.981882	1.2207	1.29556	1.27103	0.91048	1.02134	1.00437			557.2	1.18378	1.10497	1.1257	0.975026	0.977563	0.97694	1.05217	1.10892	1.02328	0.897388	0.910937	0.969843			114.4	0.0632	0.0376	0.0335	0.1247	0.1012	0.077	0.1472	0.1339	0.1436	0.1312	0.133	0.1429			114.4	0.0314	-0.0124	0.0437	0.057
557.4	1.49299	1.37677	1.46358	0.983094	0.983696	0.981078	1.21983	1.29433	1.27031	0.909364	1.02025	1.00313			557.4	1.18246	1.10376	1.1243	0.97425	0.976778	0.975973	1.05115	1.10822	1.02243	0.896336	0.909926	0.968598			114.8	0.0628	0.0369	0.0335	0.1245	0.1005	0.0777	0.1473	0.1317	0.1435	0.1314	0.132	0.1415			114.8	0.0311	-0.0125	0.0439	0.0561
557.6	1.48901	1.37269	1.45995	0.981402	0.982465	0.979517	1.2181	1.29222	1.26873	0.907428	1.01781	1.00091			557.6	1.17994	1.10101	1.1219	0.97269	0.975173	0.974179	1.0491	1.10635	1.02113	0.894184	0.907724	0.966444			115.2	0.0622	0.0381	0.035	0.1244	0.1003	0.0775	0.1461	0.1318	0.1447	0.1305	0.1312	0.1426			115.2	0.0314	-0.0124	0.0459	0.0569
557.8	1.48619	1.37029	1.45723	0.980433	0.981679	0.978583	1.21671	1.29114	1.26755	0.905932	1.01638	0.999309			557.8	1.17807	1.09945	1.12012	0.971413	0.97396	0.973293	1.04764	1.1054	1.02016	0.892402	0.906129	0.965126			115.6	0.0642	0.0385	0.0332	0.1259	0.1009	0.0777	0.1472	0.1322	0.144	0.1308	0.1324	0.1426			115.6	0.0312	-0.0117	0.0453	0.057
558	1.48261	1.36715	1.45384	0.979075	0.980392	0.977201	1.21513	1.28977	1.26602	0.904101	1.01456	0.997396			558	1.17558	1.09736	1.11796	0.969824	0.972453	0.971938	1.04592	1.10403	1.01924	0.890317	0.904027	0.963342			116	0.0627	0.0384	0.0335	0.1243	0.1017	0.0769	0.1468	0.1327	0.1426	0.1303	0.1319	0.1428			116	0.0301	-0.0114	0.0452	0.0564
558.2	1.47981	1.36462	1.45126	0.977918	0.979397	0.976325	1.21401	1.28855	1.26523	0.902619	1.01318	0.995638			558.2	1.17364	1.09558	1.11614	0.968597	0.971425	0.970733	1.04477	1.10293	1.01844	0.888948	0.902485	0.961658			116.4	0.0641	0.0397	0.0331	0.1257	0.1026	0.0786	0.1484	0.1334	0.1446	0.131	0.1324	0.143			116.4	0.0311	-0.0108	0.0459	0.0588
558.4	1.47624	1.3616	1.44803	0.976561	0.978061	0.974937	1.21268	1.28726	1.26418	0.900878	1.01124	0.993561			558.4	1.17124	1.09323	1.11411	0.966942	0.970004	0.969224	1.04344	1.10125	1.01736	0.886848	0.900426	0.959722			116.8	0.0642	0.0375	0.0349	0.1264	0.1033	0.0788	0.1474	0.1321	0.1439	0.1305	0.1306	0.1429			116.8	0.031	-0.0115	0.0451	0.0574
558.6	1.47327	1.35905	1.44534	0.975519	0.977112	0.97387	1.21161	1.28623	1.26359	0.899249	1.00986	0.991962			558.6	1.16944	1.09162	1.1122	0.96569	0.968513	0.968139	1.04231	1.09994	1.0168	0.885052	0.898849	0.958128			117.2	0.0641	0.0383	0.0328	0.1265	0.1019	0.0784	0.1482	0.1322	0.1434	0.1307	0.1301	0.1421			117.2	0.0314	-0.0123	0.0456	0.0582
558.8	1.46962	1.35558	1.44179	0.974145	0.975768	0.972656	1.21049	1.28503	1.26274	0.897297	1.00798	0.989853			558.8	1.16715	1.08953	1.11002	0.964022	0.966905	0.966612	1.0409	1.09841	1.01583	0.882803	0.897051	0.956001			117.6	0.0638	0.0385	0.0336	0.1261	0.1023	0.0795	0.1471	0.1317	0.1446	0.1297	0.1316	0.1421			117.6	0.0315	-0.0112	0.046	0.0572
559	1.4666	1.35298	1.4389	0.97301	0.974665	0.97163	1.20936	1.2838	1.26195	0.895571	1.00628	0.988323			559	1.16501	1.08784	1.10829	0.962863	0.96567	0.965184	1.0397	1.09735	1.01493	0.881306	0.895391	0.954323			118	0.0636	0.0381	0.0347	0.1263	0.1026	0.0789	0.1479	0.1311	0.1446	0.1311	0.1315	0.1429			118	0.0317	-0.012	0.0456	0.057
559.2	1.46245	1.34953	1.4353	0.97156	0.97311	0.969986	1.20836	1.2824	1.26096	0.893495	1.00423	0.986545			559.2	1.16249	1.08598	1.10608	0.960979	0.964202	0.963507	1.03818	1.09599	1.01377	0.879491	0.893511	0.952221			118.4	0.0642	0.0391	0.0343	0.1265	0.1031	0.0798	0.148	0.1315	0.1451	0.131	0.1308	0.1429			118.4	0.0312	-0.0112	0.0466	0.0583
559.4	1.45775	1.34472	1.43099	0.969872	0.971195	0.968268	1.20721	1.28071	1.26002	0.890911	1.00171	0.984168			559.4	1.15927	1.08317	1.10344	0.958739	0.962222	0.961347	1.03649	1.09406	1.0125	0.876952	0.890769	0.949735			118.8	0.0634	0.0394	0.035	0.1265	0.1045	0.0802	0.1473	0.1335	0.1446	0.1306	0.133	0.1439			118.8	0.031	-0.0105	0.0466	0.0565
559.6	1.45553	1.34273	1.42898	0.968839	0.970481	0.96725	1.20672	1.27992	1.25962	0.889886	1.00035	0.982957			559.6	1.15775	1.08182	1.10222	0.957715	0.961393	0.960268	1.03588	1.0932	1.01213	0.875653	0.88936	0.948388			119.2	0.0653	0.0388	0.0338	0.1271	0.103	0.079	0.1476	0.1313	0.1432	0.1303	0.1319	0.142			119.2	0.0325	-0.0115	0.0456	0.0586
559.8	1.45114	1.33817	1.42469	0.966707	0.968277	0.965421	1.20535	1.27826	1.25877	0.88771	0.997686	0.980178			559.8	1.15458	1.07898	1.09909	0.955782	0.959253	0.958506	1.03421	1.09172	1.01098	0.872971	0.886872	0.946026			119.6	0.0647	0.0397	0.0329	0.1267	0.1045	0.0798	0.1471	0.1328	0.1447	0.1322	0.1319	0.1419			119.6	0.0319	-0.011	0.0464	0.0581
560	1.44802	1.33536	1.42178	0.965435	0.967108	0.964204	1.20463	1.27745	1.25862	0.886028	0.995879	0.978721			560	1.15248	1.07712	1.09695	0.954291	0.957766	0.957011	1.03318	1.09072	1.01053	0.871137	0.88512	0.944248			120	0.0653	0.0391	0.0338	0.1282	0.1043	0.0798	0.1477	0.1308	0.1437	0.131	0.1311	0.1416			120	0.0318	-0.0116	0.0459	0.0594
560.2	1.44407	1.3315	1.41796	0.963717	0.965389	0.96249	1.20392	1.27635	1.25843	0.883757	0.993787	0.976616			560.2	1.14985	1.07472	1.09438	0.95232	0.955793	0.955333	1.03203	1.08942	1.00998	0.868799	0.883135	0.941966			120.4	0.0646	0.0403	0.0331	0.1276	0.1047	0.079	0.1465	0.1318	0.144	0.1303	0.1326	0.1414			120.4	0.031	-0.0107	0.0464	0.0584
560.4	1.44112	1.32881	1.41508	0.962486	0.964107	0.961257	1.20344	1.27539	1.25807	0.881985	0.991927	0.974748			560.4	1.14764	1.07257	1.09248	0.950957	0.954253	0.953828	1.03076	1.08817	1.00905	0.86686	0.881247	0.940181			120.8	0.0649	0.0389	0.0351	0.1268	0.1038	0.0812	0.1473	0.1326	0.1446	0.13	0.1314	0.1433			120.8	0.0317	-0.0119	0.0466	0.058
560.6	1.43706	1.32558	1.41129	0.960673	0.962337	0.959406	1.20283	1.27421	1.25765	0.879795	0.989636	0.972485			560.6	1.14489	1.07	1.08993	0.949154	0.952371	0.951835	1.02925	1.08651	1.00809	0.864492	0.879052	0.938316			121.2	0.0654	0.04	0.0339	0.1292	0.1048	0.0805	0.1485	0.1328	0.1443	0.1306	0.1317	0.1422			121.2	0.0318	-0.0115	0.0461	0.0582
560.8	1.4337	1.32253	1.40808	0.959388	0.960763	0.958035	1.20191	1.27374	1.25764	0.878115	0.987863	0.970499			560.8	1.14266	1.0679	1.08799	0.947563	0.950949	0.950304	1.02822	1.08534	1.00765	0.862516	0.877065	0.93634			121.6	0.0643	0.0398	0.035	0.1277	0.1055	0.0809	0.1469	0.1332	0.1455	0.1302	0.1322	0.1427			121.6	0.032	-0.011	0.0471	0.0587
561	1.42966	1.31876	1.40398	0.957771	0.959053	0.956326	1.20111	1.27323	1.25731	0.876036	0.985697	0.968029			561	1.13992	1.06534	1.08543	0.945414	0.949138	0.948371	1.02708	1.08427	1.00696	0.860171	0.874705	0.933813			122	0.0664	0.0401	0.0338	0.1288	0.1046	0.0802	0.1478	0.132	0.1445	0.132	0.1318	0.1416			122	0.0328	-0.0111	0.0463	0.0596
561.2	1.42645	1.31553	1.40082	0.956306	0.957545	0.954767	1.20065	1.27268	1.25737	0.874432	0.983624	0.965891			561.2	1.13759	1.06327	1.08339	0.94393	0.947626	0.946749	1.02631	1.08345	1.00642	0.858545	0.872843	0.931548			122.4	0.0646	0.0397	0.0345	0.1291	0.1055	0.0813	0.1461	0.1326	0.1446	0.1318	0.1309	0.142			122.4	0.0323	-0.0105	0.0468	0.0587
561.4	1.42231	1.31195	1.39696	0.954357	0.955931	0.95285	1.20027	1.27201	1.25773	0.872394	0.981192	0.963212			561.4	1.13486	1.06093	1.08084	0.941985	0.945689	0.944607	1.02535	1.08232	1.00565	0.856297	0.870426	0.929004			122.8	0.0653	0.0404	0.0345	0.1274	0.1058	0.0805	0.1457	0.1325	0.1441	0.1305	0.1323	0.1426			122.8	0.0311	-0.0112	0.0468	0.0588
561.6	1.41731	1.30744	1.39245	0.952393	0.953595	0.950127	1.19987	1.27142	1.25823	0.869756	0.978005	0.960347			561.6	1.13172	1.05792	1.07786	0.939704	0.943219	0.942246	1.02414	1.08107	1.00493	0.853191	0.867357	0.92606			123.2	0.0652	0.0406	0.0339	0.1286	0.1065	0.0812	0.147	0.1334	0.1445	0.1302	0.132	0.1423			123.2	0.0316	-0.0107	0.0474	0.0578
561.8	1.41379	1.30412	1.38911	0.950748	0.952109	0.948694	1.19946	1.2712	1.25871	0.867976	0.976013	0.958537			561.8	1.12933	1.0558	1.07544	0.93801	0.9416	0.940552	1.02368	1.08054	1.00457	0.851241	0.865586	0.923893			123.6	0.0663	0.0403	0.0346	0.1303	0.1059	0.0817	0.1473	0.1315	0.145	0.1312	0.1327	0.1434			123.6	0.0323	-0.0111	0.0477	0.0595
562	1.40966	1.30011	1.38502	0.948831	0.950336	0.946692	1.19922	1.27105	1.25904	0.865744	0.973345	0.956027			562	1.12637	1.05313	1.07264	0.935916	0.939711	0.938431	1.02286	1.07995	1.00422	0.848888	0.863203	0.92122			124	0.0669	0.0412	0.0355	0.1299	0.1068	0.0822	0.1473	0.133	0.1454	0.1319	0.1321	0.1424			124	0.0324	-0.0101	0.0482	0.0595
562.2	1.40614	1.29726	1.38146	0.947287	0.948755	0.945091	1.19911	1.27091	1.25954	0.863854	0.971062	0.954012			562.2	1.12402	1.05069	1.07018	0.934152	0.938096	0.936954	1.02236	1.07942	1.00417	0.846565	0.861215	0.919314			124.4	0.0662	0.0396	0.0356	0.1291	0.1056	0.0825	0.147	0.1327	0.1448	0.1309	0.1302	0.1418			124.4	0.0329	-0.0102	0.0475	0.0594
562.4	1.40172	1.29366	1.37719	0.945215	0.946864	0.943053	1.19909	1.27103	1.2604	0.861798	0.968531	0.951468			562.4	1.12105	1.04784	1.0674	0.932073	0.935896	0.935026	1.02145	1.07869	1.00416	0.843779	0.858782	0.916639			124.8	0.0665	0.04	0.0347	0.1286	0.1067	0.082	0.1474	0.1305	0.1446	0.131	0.131	0.142			124.8	0.0319	-0.0115	0.0476	0.059
562.6	1.39832	1.29087	1.374	0.943586	0.94554	0.941614	1.19939	1.27119	1.26121	0.860016	0.966423	0.949447			562.6	1.1187	1.04552	1.06523	0.930453	0.934081	0.93343	1.02113	1.07828	1.00411	0.841626	0.856779	0.914619			125.2	0.0657	0.0412	0.0342	0.1296	0.1057	0.0828	0.1471	0.1328	0.1455	0.132	0.1314	0.1436			125.2	0.0329	-0.0102	0.0486	0.0592
562.8	1.39388	1.28727	1.36988	0.941511	0.943718	0.939657	1.19974	1.27161	1.26222	0.857849	0.963898	0.946884			562.8	1.11588	1.04271	1.0623	0.928354	0.932036	0.931336	1.02063	1.07764	1.00415	0.839107	0.854401	0.911913			125.6	0.0662	0.0411	0.0348	0.1296	0.1078	0.083	0.1467	0.1323	0.1465	0.1296	0.1332	0.1437			125.6	0.0317	-0.0102	0.0482	0.0587
563	1.39026	1.28393	1.36631	0.93999	0.941843	0.938026	1.20012	1.27194	1.26331	0.855959	0.961862	0.944512			563	1.1135	1.04024	1.06004	0.92659	0.930124	0.929606	1.02013	1.07736	1.0042	0.836927	0.852425	0.909496			126	0.0665	0.0414	0.0349	0.13	0.1081	0.0824	0.1461	0.133	0.1443	0.1308	0.1332	0.1431			126	0.0322	-0.0096	0.0474	0.059
563.2	1.38574	1.27985	1.36205	0.938099	0.93979	0.935865	1.20058	1.27249	1.26458	0.85351	0.959112	0.941864			563.2	1.11032	1.03743	1.05715	0.924516	0.927821	0.927401	1.0199	1.07681	1.00426	0.834447	0.849973	0.906585			126.4	0.0662	0.0412	0.0343	0.1299	0.1074	0.0823	0.1469	0.1318	0.1447	0.129	0.1307	0.1416			126.4	0.0314	-0.0103	0.0477	0.0596
563.4	1.3805	1.27517	1.35685	0.935641	0.937002	0.933418	1.20121	1.27375	1.26627	0.850819	0.956224	0.938422			563.4	1.1066	1.03406	1.05373	0.921715	0.925358	0.924983	1.01957	1.07657	1.00448	0.831423	0.847022	0.90356			126.8	0.0673	0.0408	0.0344	0.1296	0.1076	0.0818	0.1479	0.1329	0.1448	0.1315	0.1301	0.1417			126.8	0.0328	-0.0111	0.0477	0.0602
563.6	1.37696	1.27187	1.35311	0.933978	0.935378	0.93175	1.2018	1.27433	1.2678	0.848944	0.954022	0.936405			563.6	1.10407	1.03195	1.05159	0.920041	0.923592	0.92328	1.0192	1.07641	1.00469	0.829106	0.844884	0.901322			127.2	0.0677	0.0417	0.0351	0.1301	0.1077	0.0831	0.1469	0.1319	0.1451	0.1312	0.1313	0.1436			127.2	0.0332	-0.0105	0.0487	0.0598
563.8	1.37248	1.26769	1.34871	0.931728	0.933256	0.929622	1.20273	1.27527	1.26969	0.84669	0.951358	0.933823			563.8	1.10094	1.02912	1.04865	0.917867	0.921478	0.921052	1.0189	1.07615	1.00516	0.826559	0.842628	0.898666			127.6	0.0672	0.0412	0.036	0.1305	0.1087	0.0832	0.1473	0.133	0.145	0.1299	0.1325	0.143			127.6	0.0323	-0.01	0.0477	0.0594
564	1.3691	1.26405	1.34522	0.93005	0.931674	0.92821	1.20352	1.27616	1.27164	0.844605	0.949397	0.931534			564	1.09825	1.0269	1.04622	0.916218	0.919782	0.919232	1.01873	1.07615	1.00553	0.82441	0.840774	0.896328			128	0.0674	0.0414	0.0353	0.1317	0.1079	0.083	0.1476	0.1323	0.144	0.1309	0.1327	0.1433			128	0.0337	-0.0094	0.0482	0.0596
564.2	1.36497	1.25995	1.34092	0.927732	0.929637	0.926076	1.20502	1.27728	1.27416	0.841819	0.94677	0.92878			564.2	1.09493	1.02409	1.04327	0.913887	0.917522	0.917055	1.01866	1.07634	1.00601	0.821574	0.838376	0.893714			128.4	0.067	0.043	0.0355	0.1303	0.1099	0.0831	0.1467	0.1327	0.1453	0.1293	0.1329	0.1428			128.4	0.0319	-0.0089	0.0492	0.0593
564.4	1.36131	1.25675	1.33753	0.925941	0.927799	0.92439	1.20601	1.27842	1.27646	0.839656	0.944705	0.926865			564.4	1.09218	1.02176	1.04066	0.91203	0.915665	0.915306	1.01899	1.07624	1.00661	0.81922	0.836554	0.89207			128.8	0.0678	0.0422	0.0353	0.132	0.1095	0.0837	0.1471	0.1329	0.1444	0.1296	0.1331	0.143			128.8	0.0326	-0.0091	0.0487	0.06
564.6	1.35667	1.25275	1.33302	0.923518	0.925545	0.922246	1.20757	1.27994	1.27931	0.836921	0.94203	0.924298			564.6	1.08894	1.01882	1.03751	0.909643	0.913247	0.913066	1.0193	1.07595	1.00763	0.816213	0.833993	0.889592			129.2	0.0678	0.042	0.035	0.1308	0.1073	0.0831	0.1468	0.1335	0.1451	0.131	0.1317	0.1415			129.2	0.0332	-0.0092	0.0486	0.0617
564.8	1.35311	1.24934	1.32931	0.921833	0.923702	0.920584	1.20874	1.28123	1.28167	0.834992	0.93984	0.922135			564.8	1.08635	1.01642	1.03487	0.907661	0.911255	0.911137	1.01935	1.0761	1.0083	0.813952	0.832131	0.887419			129.6	0.0684	0.0419	0.0345	0.1316	0.1091	0.0833	0.1484	0.1315	0.1446	0.131	0.1322	0.1424			129.6	0.0332	-0.0095	0.0479	0.0604
565	1.3486	1.24503	1.32472	0.919708	0.92164	0.918471	1.21036	1.28289	1.28458	0.832546	0.93711	0.919329			565	1.08316	1.01337	1.03173	0.905108	0.908586	0.908787	1.01955	1.07631	1.0092	0.811247	0.82975	0.884687			130	0.0688	0.0416	0.0358	0.1318	0.1085	0.0847	0.1476	0.1329	0.1453	0.131	0.1312	0.1427			130	0.0338	-0.0096	0.0494	0.0605
565.2	1.34525	1.2417	1.32114	0.917778	0.91971	0.916685	1.21198	1.28438	1.28744	0.830302	0.93487	0.916744			565.2	1.08057	1.01091	1.02942	0.903289	0.906601	0.906975	1.01972	1.0766	1.01015	0.808881	0.827711	0.882637			130.4	0.0682	0.0433	0.0355	0.1321	0.1094	0.0829	0.1478	0.1335	0.1446	0.1308	0.1326	0.1431			130.4	0.0329	-0.0096	0.0495	0.0608
565.4	1.34081	1.23758	1.31654	0.91523	0.917238	0.914432	1.21402	1.28642	1.29105	0.82766	0.932172	0.913643			565.4	1.07724	1.00805	1.02645	0.900947	0.904222	0.904673	1.02003	1.07691	1.0113	0.805919	0.82533	0.879903			130.8	0.0676	0.0424	0.0354	0.1323	0.1094	0.085	0.1467	0.133	0.1457	0.1298	0.1304	0.1428			130.8	0.0328	-0.0096	0.0497	0.06
565.6	1.33552	1.23224	1.31173	0.912391	0.914452	0.911604	1.21701	1.28911	1.29528	0.82469	0.929313	0.909941			565.6	1.07316	1.00468	1.02274	0.89826	0.901175	0.901791	1.02071	1.07771	1.01255	0.802664	0.822539	0.876487			131.2	0.0682	0.0416	0.0362	0.132	0.1092	0.084	0.1478	0.132	0.1455	0.1317	0.1314	0.1431			131.2	0.0329	-0.0103	0.0494	0.0608
565.8	1.33182	1.22876	1.30818	0.91046	0.912464	0.909732	1.21867	1.29096	1.29826	0.822697	0.927248	0.907524			565.8	1.07045	1.00227	1.02001	0.896272	0.899309	0.89985	1.02129	1.07845	1.01338	0.8002	0.820367	0.874552			131.6	0.0679	0.0423	0.034	0.1307	0.1102	0.084	0.1487	0.1324	0.146	0.1325	0.1309	0.1407			131.6	0.0336	-0.0093	0.0484	0.0616
566	1.32707	1.22408	1.30359	0.908181	0.910008	0.907305	1.22094	1.29347	1.30201	0.820061	0.924522	0.904489			566	1.06689	0.999305	1.01667	0.893767	0.896984	0.897255	1.02209	1.07936	1.01485	0.797279	0.817662	0.871792			132	0.0688	0.0429	0.036	0.1328	0.1099	0.0833	0.1479	0.1331	0.1456	0.1315	0.1325	0.1421			132	0.0334	-0.0086	0.0487	0.0612
566.2	1.32343	1.2208	1.29983	0.906134	0.908074	0.905393	1.22303	1.29562	1.30517	0.817946	0.922406	0.902114			566.2	1.06423	0.997109	1.01441	0.891973	0.895106	0.895138	1.02288	1.08014	1.01634	0.794919	0.815862	0.870174			132.4	0.0688	0.0435	0.0345	0.1327	0.1106	0.0847	0.1473	0.1328	0.1462	0.1314	0.1324	0.1414			132.4	0.0341	-0.0086	0.0499	0.0604
566.4	1.31894	1.21684	1.29525	0.903764	0.905801	0.903004	1.22586	1.29871	1.30956	0.815234	0.919664	0.899424			566.4	1.06065	0.994317	1.01126	0.889626	0.892373	0.892535	1.02377	1.08115	1.01781	0.792212	0.8132	0.867826			132.8	0.0688	0.0432	0.0356	0.132	0.1106	0.0847	0.1469	0.133	0.1446	0.1299	0.1316	0.1423			132.8	0.0329	-0.0093	0.0495	0.0603
566.6	1.31526	1.21347	1.29139	0.901804	0.903814	0.901142	1.22815	1.30109	1.31367	0.81322	0.917427	0.897262			566.6	1.05793	0.991621	1.00861	0.887527	0.890185	0.890345	1.02427	1.08234	1.01942	0.789685	0.811014	0.865896			133.2	0.0687	0.0432	0.0358	0.1328	0.1096	0.0858	0.1469	0.1323	0.146	0.1296	0.1307	0.1426			133.2	0.0329	-0.0098	0.051	0.0598
566.8	1.31053	1.20906	1.28673	0.899347	0.901524	0.898683	1.2312	1.30396	1.31865	0.810763	0.914754	0.894321			566.8	1.05458	0.988394	1.00537	0.884866	0.887531	0.887707	1.02516	1.08363	1.02141	0.786719	0.808458	0.863228			133.6	0.0689	0.0428	0.036	0.1324	0.1104	0.0854	0.1474	0.1329	0.1458	0.1306	0.1311	0.1437			133.6	0.0346	-0.0095	0.05	0.0615
567	1.30648	1.20553	1.28309	0.897448	0.899603	0.896705	1.23415	1.30688	1.32274	0.808939	0.91253	0.891991			567	1.05176	0.985888	1.00258	0.882607	0.885524	0.885624	1.02661	1.08481	1.02324	0.7844	0.80651	0.861296			134	0.0687	0.0444	0.0351	0.1321	0.1112	0.0855	0.1465	0.1328	0.1464	0.1307	0.1321	0.1432			134	0.0333	-0.009	0.0503	0.0611
567.2	1.30144	1.20123	1.27822	0.894869	0.897157	0.894112	1.23768	1.31087	1.32792	0.806246	0.909608	0.888899			567.2	1.04822	0.982726	0.999189	0.879898	0.882733	0.882826	1.02841	1.08669	1.02559	0.781332	0.803867	0.85885			134.4	0.0683	0.0438	0.036	0.1336	0.1102	0.0853	0.1482	0.1328	0.1456	0.1315	0.1326	0.1418			134.4	0.0343	-0.009	0.0505	0.0625
567.4	1.2955	1.19621	1.27261	0.891981	0.894208	0.890896	1.24255	1.31568	1.33428	0.803023	0.905969	0.885277			567.4	1.0442	0.978502	0.995299	0.876658	0.879469	0.879778	1.03078	1.08893	1.0287	0.77772	0.800314	0.855413			134.8	0.0702	0.0448	0.0357	0.1343	0.1122	0.0845	0.148	0.1332	0.1448	0.1328	0.1317	0.141			134.8	0.0337	-0.0083	0.0503	0.0613
567.6	1.29162	1.1928	1.26876	0.889926	0.892158	0.8888	1.24555	1.31896	1.33876	0.801071	0.903747	0.883118			567.6	1.04175	0.975991	0.992746	0.874676	0.877365	0.877629	1.03213	1.09019	1.03065	0.775387	0.798124	0.85316			135.2	0.0687	0.0444	0.0363	0.1328	0.1115	0.0867	0.146	0.1337	0.1464	0.1299	0.1302	0.1431			135.2	0.0328	-0.0088	0.0515	0.0603
567.8	1.28692	1.18847	1.26404	0.887331	0.889629	0.886162	1.24936	1.32338	1.34478	0.798699	0.900796	0.880272			567.8	1.0385	0.972781	0.989745	0.872168	0.874704	0.874893	1.03408	1.09236	1.03327	0.772475	0.795477	0.850211			135.6	0.0683	0.0444	0.0359	0.133	0.1114	0.0856	0.148	0.1323	0.1456	0.1315	0.1314	0.1424			135.6	0.0336	-0.0098	0.0511	0.0612
568	1.28306	1.18498	1.26038	0.885302	0.88757	0.884203	1.25255	1.32669	1.3498	0.796689	0.898606	0.877995			568	1.0355	0.970103	0.987126	0.870275	0.872603	0.872769	1.03587	1.09437	1.0355	0.770463	0.7933	0.847978			136	0.0699	0.0435	0.0363	0.1334	0.1118	0.0864	0.1471	0.1323	0.1443	0.1307	0.1319	0.1426			136	0.034	-0.0088	0.0499	0.0619
568.2	1.27815	1.1804	1.25566	0.882762	0.884901	0.881837	1.25691	1.33129	1.3561	0.794179	0.895968	0.875245			568.2	1.03175	0.966708	0.983874	0.867709	0.86996	0.870274	1.03828	1.09668	1.03862	0.767644	0.790689	0.844995			136.4	0.0711	0.0436	0.0371	0.1356	0.1127	0.0861	0.1494	0.1336	0.1456	0.1328	0.1322	0.142			136.4	0.0359	-0.0087	0.0503	0.0634
568.4	1.2741	1.17686	1.25181	0.880728	0.882846	0.879796	1.26054	1.33514	1.36131	0.79226	0.89368	0.873138			568.4	1.02876	0.964013	0.981162	0.865692	0.867824	0.868297	1.04007	1.09855	1.04138	0.765131	0.788782	0.842948			136.8	0.0702	0.0446	0.0353	0.1326	0.1125	0.0855	0.147	0.1335	0.1442	0.1306	0.1314	0.1419			136.8	0.0342	-0.0081	0.0501	0.0625
568.6	1.26897	1.17241	1.24694	0.878274	0.880258	0.877198	1.26526	1.34016	1.36773	0.789776	0.890788	0.870729			568.6	1.02508	0.960847	0.977745	0.862819	0.865307	0.865596	1.04261	1.10098	1.04459	0.76195	0.786231	0.840212			137.2	0.0717	0.0438	0.0374	0.1352	0.1128	0.0872	0.1478	0.1337	0.1456	0.1314	0.1318	0.1423			137.2	0.0351	-0.0084	0.0509	0.0632
568.8	1.26524	1.16876	1.24312	0.876339	0.878318	0.875237	1.26924	1.34439	1.3734	0.787766	0.888627	0.868742			568.8	1.02218	0.958277	0.975135	0.860602	0.863224	0.863417	1.04435	1.10285	1.0471	0.759846	0.783905	0.838151			137.6	0.0702	0.0441	0.0362	0.1341	0.1122	0.0865	0.1482	0.1327	0.1454	0.13	0.1307	0.1422			137.6	0.0333	-0.0098	0.0505	0.0618
569	1.26035	1.16437	1.23814	0.873884	0.876001	0.872838	1.27418	1.34966	1.3805	0.785182	0.885781	0.86623			569	1.01857	0.954958	0.971825	0.857797	0.860778	0.860522	1.04662	1.10541	1.05044	0.756969	0.781172	0.835601			138	0.0714	0.044	0.0361	0.134	0.1119	0.0876	0.1467	0.1314	0.1454	0.1302	0.1313	0.1427			138	0.0341	-0.0102	0.0518	0.062
569.2	1.25442	1.15918	1.23262	0.870862	0.873008	0.869686	1.28091	1.35619	1.38926	0.781736	0.882409	0.862951			569.2	1.01426	0.950838	0.967854	0.854593	0.857504	0.85761	1.0501	1.10873	1.05517	0.753658	0.778206	0.83204			138.4	0.0695	0.0449	0.0374	0.1334	0.1129	0.0874	0.1464	0.1334	0.1457	0.1306	0.1316	0.1433			138.4	0.0352	-0.0082	0.0517	0.0619
569.4	1.25039	1.15572	1.22883	0.868601	0.871043	0.867586	1.28538	1.36085	1.39548	0.779641	0.880178	0.860787			569.4	1.01143	0.948204	0.965186	0.852326	0.855303	0.855697	1.05219	1.11096	1.05795	0.751419	0.775947	0.830015			138.8	0.0715	0.0448	0.0366	0.1355	0.1134	0.0877	0.1477	0.1322	0.1462	0.1324	0.1316	0.1427			138.8	0.0348	-0.0078	0.0516	0.0632
569.6	1.24563	1.15129	1.22436	0.86589	0.868514	0.864934	1.29093	1.3669	1.40352	0.777112	0.877592	0.857823			569.6	1.0077	0.944849	0.961846	0.849484	0.85258	0.853333	1.05501	1.11372	1.06177	0.74833	0.773316	0.827002			139.2	0.0707	0.0451	0.0362	0.1337	0.1134	0.0876	0.148	0.1332	0.1471	0.131	0.1324	0.1436			139.2	0.0341	-0.0075	0.0517	0.0627
569.8	1.24154	1.14781	1.22056	0.863768	0.866444	0.862739	1.29582	1.37175	1.40999	0.775131	0.875253	0.855544			569.8	1.00481	0.942143	0.959222	0.847284	0.850689	0.85136	1.05752	1.11621	1.06515	0.746074	0.77142	0.824724			139.6	0.0698	0.0452	0.0359	0.136	0.1131	0.0883	0.1475	0.1328	0.146	0.1305	0.1317	0.1426			139.6	0.0342	-0.0078	0.0515	0.0627
570	1.23634	1.14315	1.21585	0.861272	0.863907	0.859984	1.30195	1.37797	1.41802	0.772531	0.872548	0.852507			570	1.00111	0.938871	0.956169	0.844556	0.848166	0.848819	1.06075	1.11924	1.06923	0.743098	0.769035	0.821702			140	0.071	0.0454	0.0372	0.1348	0.1132	0.0881	0.1471	0.1318	0.1457	0.1305	0.1317	0.1441			140	0.0344	-0.0092	0.053	0.0624
570.2	1.2326	1.13942	1.21192	0.859183	0.861817	0.857948	1.30686	1.38344	1.425	0.770432	0.870359	0.850206			570.2	0.99806	0.936149	0.953543	0.842501	0.846133	0.846777	1.06356	1.12192	1.07262	0.740636	0.766807	0.819557			140.4	0.0712	0.0458	0.037	0.1348	0.1142	0.0892	0.1469	0.1336	0.1452	0.1304	0.1331	0.142			140.4	0.0347	-0.008	0.0523	0.0633
570.4	1.22763	1.1351	1.20718	0.856499	0.859114	0.855269	1.31334	1.38988	1.43411	0.767697	0.867808	0.847184			570.4	0.994594	0.933002	0.950273	0.839854	0.843431	0.844149	1.06673	1.12546	1.07692	0.737672	0.764298	0.817166			140.8	0.0727	0.0447	0.0383	0.1364	0.113	0.0881	0.1483	0.1324	0.146	0.1326	0.1325	0.1428			140.8	0.037	-0.0081	0.0519	0.0627
570.6	1.22359	1.13144	1.20351	0.85428	0.857006	0.853263	1.31847	1.39507	1.44147	0.765669	0.86595	0.845231			570.6	0.991671	0.930519	0.947585	0.837546	0.841337	0.841989	1.06959	1.12838	1.08037	0.735349	0.762285	0.815048			141.2	0.0715	0.0461	0.0371	0.1347	0.1151	0.0875	0.1474	0.134	0.1463	0.1312	0.1321	0.1423			141.2	0.0349	-0.0082	0.0522	0.0629
570.8	1.21858	1.12686	1.19878	0.851455	0.854416	0.850584	1.32484	1.40191	1.45068	0.763288	0.863358	0.842511			570.8	0.987955	0.927445	0.944006	0.834649	0.838704	0.839377	1.073	1.13196	1.08494	0.732286	0.759771	0.812462			141.6	0.0727	0.0452	0.0372	0.1358	0.1134	0.0877	0.1475	0.1307	0.1456	0.1313	0.1301	0.1431			141.6	0.036	-0.0089	0.0526	0.0632
571	1.21261	1.12144	1.19351	0.848496	0.851354	0.847524	1.33335	1.41103	1.46186	0.760566	0.860119	0.839173			571	0.983151	0.923408	0.939731	0.831122	0.83525	0.835919	1.07783	1.13728	1.09061	0.72847	0.756881	0.809748			142	0.0715	0.0463	0.0364	0.1359	0.1147	0.088	0.1478	0.1337	0.147	0.131	0.1321	0.1417			142	0.0344	-0.0082	0.0522	0.063
571.2	1.20955	1.11879	1.19051	0.846902	0.849886	0.846049	1.33804	1.41567	1.46725	0.758964	0.858489	0.837764			571.2	0.980767	0.921408	0.937512	0.829491	0.83377	0.834418	1.08001	1.13958	1.0931	0.726662	0.755067	0.808241			142.4	0.0719	0.046	0.0373	0.1363	0.1131	0.0885	0.1491	0.1319	0.1468	0.1304	0.1321	0.1434			142.4	0.0358	-0.0085	0.053	0.0636
571.4	1.20483	1.11441	1.1858	0.84422	0.847368	0.843209	1.3456	1.42377	1.47702	0.756799	0.855883	0.834761			571.4	0.97738	0.918137	0.934213	0.826704	0.83131	0.831676	1.08386	1.14354	1.09818	0.72352	0.752644	0.80593			142.8	0.0719	0.0465	0.0371	0.1359	0.1137	0.0879	0.1466	0.1321	0.1462	0.1309	0.1328	0.1416			142.8	0.0363	-0.009	0.0532	0.0637
571.6	1.2009	1.11097	1.1819	0.8421	0.84537	0.841027	1.35139	1.4303	1.48459	0.754998	0.853606	0.832386			571.6	0.974503	0.915347	0.931471	0.824674	0.829308	0.829613	1.0868	1.14728	1.10207	0.721009	0.750656	0.804147			143.2	0.0724	0.0462	0.0381	0.1365	0.1151	0.0894	0.1474	0.1328	0.1462	0.1313	0.1325	0.1432			143.2	0.0357	-0.0071	0.0531	0.063
571.8	1.19506	1.10582	1.17609	0.838881	0.84209	0.837459	1.36077	1.43988	1.49686	0.752088	0.850436	0.829349			571.8	0.970225	0.911358	0.927329	0.821255	0.826132	0.826144	1.09156	1.15271	1.10824	0.717307	0.747561	0.801373			143.6	0.072	0.0468	0.0384	0.136	0.1146	0.0887	0.1473	0.1321	0.1463	0.1319	0.1313	0.1422			143.6	0.0356	-0.0079	0.0535	0.0645
572	1.19012	1.10136	1.17145	0.836082	0.839464	0.834744	1.36848	1.4483	1.50742	0.749595	0.847888	0.826618			572	0.966522	0.907974	0.923827	0.81851	0.823338	0.823315	1.09566	1.15737	1.11376	0.714615	0.745305	0.799051			144	0.0732	0.0456	0.0376	0.1368	0.1139	0.0894	0.1481	0.1325	0.1458	0.1312	0.1313	0.1435			144	0.0357	-0.0084	0.0527	0.0636
572.2	1.18609	1.09778	1.16772	0.833906	0.837211	0.832464	1.37487	1.45509	1.5162	0.747472	0.845827	0.824598			572.2	0.963541	0.905228	0.92093	0.816266	0.821022	0.821034	1.09955	1.16154	1.11839	0.712149	0.743558	0.797241			144.4	0.0719	0.0459	0.0368	0.1355	0.1141	0.0879	0.1473	0.1324	0.1463	0.1301	0.1304	0.1423			144.4	0.0368	-0.0089	0.0529	0.0638
572.4	1.18141	1.0934	1.16293	0.831234	0.834408	0.829604	1.38331	1.464	1.52749	0.745329	0.843564	0.821793			572.4	0.959951	0.901888	0.917499	0.813234	0.818189	0.818397	1.10433	1.16651	1.12455	0.709599	0.741288	0.79504			144.8	0.0729	0.0467	0.038	0.1368	0.1143	0.0898	0.1482	0.1324	0.1473	0.1309	0.1323	0.1437			144.8	0.0348	-0.0076	0.0543	0.0638
572.6	1.17766	1.08974	1.15886	0.829096	0.832156	0.82733	1.38994	1.47106	1.53662	0.743758	0.841709	0.819616			572.6	0.957031	0.899164	0.914658	0.810958	0.816034	0.816007	1.1079	1.1704	1.1294	0.707409	0.739539	0.793319			145.2	0.0733	0.0467	0.0379	0.1358	0.1166	0.09	0.1477	0.1326	0.1456	0.1313	0.1321	0.1425			145.2	0.0348	-0.0077	0.0532	0.0645
572.8	1.1726	1.08513	1.15392	0.826422	0.829501	0.824838	1.39873	1.4801	1.54892	0.741471	0.838944	0.817269			572.8	0.953273	0.89561	0.911084	0.808234	0.813243	0.812958	1.11263	1.17552	1.13536	0.704181	0.737023	0.791034			145.6	0.0736	0.0484	0.0382	0.1381	0.1168	0.0892	0.1485	0.1328	0.1463	0.131	0.1328	0.1428			145.6	0.0366	-0.0076	0.0542	0.0639
573	1.16863	1.08156	1.15009	0.824394	0.827295	0.822829	1.40596	1.48702	1.55835	0.739368	0.836801	0.815373			573	0.950163	0.892831	0.908122	0.805937	0.811178	0.810752	1.11658	1.17962	1.13987	0.701448	0.734799	0.78908			146	0.0731	0.0483	0.0375	0.1356	0.1161	0.0909	0.1485	0.1331	0.1467	0.1307	0.1324	0.1425			146	0.0361	-0.0071	0.0545	0.0648
573.2	1.16384	1.077	1.14545	0.821537	0.824407	0.820071	1.41477	1.496	1.57033	0.736557	0.834303	0.812827			573.2	0.946631	0.889337	0.90456	0.803002	0.808243	0.808142	1.1214	1.18467	1.14636	0.698261	0.732392	0.786627			146.4	0.0728	0.048	0.0376	0.1357	0.1167	0.09	0.1474	0.1335	0.1461	0.1318	0.1323	0.1428			146.4	0.0353	-0.0077	0.0538	0.0644
573.4	1.15998	1.07324	1.14169	0.819169	0.822086	0.817917	1.42203	1.50357	1.58042	0.734429	0.83233	0.810984			573.4	0.943754	0.886774	0.901621	0.800755	0.805963	0.805851	1.12538	1.18882	1.15158	0.695728	0.730463	0.784791			146.8	0.074	0.0472	0.0382	0.1391	0.1154	0.0897	0.1485	0.1323	0.1468	0.1317	0.1313	0.1418			146.8	0.0361	-0.0069	0.0544	0.0654
573.6	1.15428	1.06798	1.13608	0.815759	0.818849	0.81435	1.43285	1.51543	1.59512	0.731692	0.829604	0.807957			573.6	0.939613	0.882601	0.897422	0.797648	0.802398	0.802255	1.13112	1.1962	1.15968	0.692436	0.728085	0.781888			147.2	0.074	0.0472	0.0374	0.1375	0.1153	0.0887	0.1476	0.1324	0.1462	0.1306	0.1317	0.1429			147.2	0.0365	-0.0078	0.0534	0.0647
573.8	1.14967	1.06363	1.13133	0.812951	0.815949	0.811489	1.44203	1.52562	1.60767	0.729384	0.827265	0.805132			573.8	0.935815	0.878871	0.893853	0.794748	0.799666	0.79955	1.13642	1.20183	1.16638	0.689433	0.725509	0.779422			147.6	0.0724	0.0476	0.0377	0.1374	0.1164	0.0896	0.1478	0.1338	0.1463	0.13	0.1328	0.1416			147.6	0.0347	-0.0061	0.0536	0.065
574	1.14603	1.06005	1.12745	0.810802	0.813602	0.809183	1.44978	1.53388	1.61799	0.727513	0.825306	0.802609			574	0.932971	0.876079	0.891064	0.79246	0.797509	0.797382	1.14084	1.20644	1.17163	0.686849	0.723653	0.777528			148	0.0738	0.0475	0.0377	0.138	0.1159	0.0893	0.1467	0.1322	0.1448	0.1318	0.1319	0.1423			148	0.0361	-0.0074	0.0538	0.064
574.2	1.14112	1.05558	1.12246	0.808031	0.810777	0.806474	1.45973	1.54459	1.63161	0.724973	0.823087	0.800298			574.2	0.928995	0.87257	0.887676	0.789789	0.794607	0.794701	1.14635	1.21255	1.179	0.684042	0.721317	0.775434			148.4	0.0737	0.0482	0.0384	0.1376	0.1165	0.0903	0.1467	0.1323	0.1471	0.1311	0.1317	0.1418			148.4	0.0363	-0.007	0.0546	0.065
574.4	1.1372	1.05204	1.11829	0.805765	0.808399	0.804249	1.46781	1.5527	1.64248	0.722893	0.821098	0.798294			574.4	0.926054	0.869716	0.884967	0.787636	0.792415	0.792584	1.15064	1.21696	1.18512	0.681733	0.719368	0.773356			148.8	0.075	0.0488	0.0385	0.1385	0.1151	0.0906	0.1487	0.1335	0.1476	0.1319	0.1313	0.1428			148.8	0.0364	-0.0067	0.0559	0.0658
574.6	1.13218	1.04744	1.11352	0.802978	0.805703	0.80139	1.47811	1.56272	1.65663	0.720506	0.818478	0.795403			574.6	0.922479	0.866244	0.88153	0.78469	0.789387	0.789589	1.1565	1.22332	1.19263	0.678722	0.717078	0.770998			149.2	0.0732	0.047	0.0372	0.1374	0.1155	0.0892	0.1472	0.1333	0.1464	0.1309	0.1312	0.1424			149.2	0.0363	-0.0071	0.0533	0.065
574.8	1.12799	1.04384	1.10971	0.800674	0.803307	0.799222	1.48622	1.57095	1.66804	0.718386	0.816367	0.793194			574.8	0.919489	0.863388	0.878723	0.782198	0.786918	0.787164	1.16134	1.22815	1.19836	0.676242	0.715099	0.769163			149.6	0.0739	0.0476	0.0376	0.1373	0.115	0.0902	0.147	0.1323	0.1458	0.1301	0.1307	0.1424			149.6	0.0361	-0.0081	0.0544	0.065
575	1.12205	1.03831	1.10387	0.79737	0.799726	0.795809	1.49914	1.58465	1.68553	0.715306	0.813749	0.790184			575	0.914664	0.859292	0.87427	0.778639	0.783497	0.7835	1.16871	1.23563	1.20741	0.672728	0.712093	0.766232			150	0.0747	0.0483	0.0382	0.1389	0.116	0.0896	0.1485	0.1328	0.146	0.1322	0.1322	0.1424			150	0.0367	-0.0072	0.0548	0.0658
575.2	1.11709	1.0339	1.09899	0.79451	0.796719	0.793035	1.51012	1.59604	1.7003	0.712924	0.811709	0.787187			575.2	0.910685	0.855796	0.870737	0.775681	0.780581	0.780546	1.175	1.2424	1.2152	0.66987	0.709874	0.763677			150.4	0.0736	0.0483	0.0382	0.1373	0.1158	0.0916	0.1484	0.132	0.146	0.1312	0.1309	0.1431			150.4	0.0364	-0.0071	0.0554	0.0652
575.4	1.1131	1.03047	1.09502	0.792249	0.79426	0.790774	1.51917	1.60493	1.71211	0.711141	0.809937	0.784613			575.4	0.907581	0.852984	0.867912	0.773348	0.778264	0.778298	1.18007	1.24784	1.22165	0.667355	0.70801	0.761561			150.8	0.0748	0.0485	0.0393	0.1381	0.1173	0.0917	0.1477	0.1318	0.1476	0.1317	0.1321	0.1431			150.8	0.0374	-0.0072	0.0556	0.065
575.6	1.10781	1.02569	1.09017	0.789258	0.791361	0.787911	1.53001	1.6166	1.72701	0.708659	0.80748	0.781976			575.6	0.903683	0.849445	0.864635	0.770794	0.775356	0.775445	1.18658	1.25432	1.22939	0.664168	0.705618	0.75953			151.2	0.074	0.0486	0.0379	0.1375	0.1173	0.0907	0.1466	0.1325	0.1467	0.1307	0.1325	0.143			151.2	0.0368	-0.0068	0.0547	0.0662
575.8	1.10357	1.02176	1.08629	0.786867	0.789108	0.785728	1.53875	1.62625	1.73889	0.706556	0.805208	0.77998			575.8	0.900585	0.846558	0.861887	0.768744	0.772883	0.773106	1.19173	1.26004	1.23547	0.66152	0.70366	0.757788			151.6	0.0752	0.0489	0.0392	0.1395	0.1176	0.0907	0.1478	0.1349	0.1462	0.1327	0.1323	0.1418			151.6	0.0379	-0.0061	0.0545	0.0659
576	1.09846	1.0172	1.08143	0.784033	0.786164	0.782656	1.55004	1.63776	1.75402	0.704194	0.802761	0.777136			576	0.896832	0.843368	0.858225	0.765834	0.769903	0.770016	1.19846	1.26685	1.24356	0.65886	0.701262	0.755202			152	0.0739	0.0486	0.039	0.1379	0.1175	0.0904	0.1469	0.1325	0.1464	0.1301	0.1319	0.1425			152	0.0354	-0.0067	0.0549	0.0656
576.2	1.09449	1.01355	1.07768	0.781698	0.783719	0.780205	1.55901	1.6475	1.7658	0.70254	0.801002	0.77499			576.2	0.893807	0.840654	0.855305	0.763509	0.767518	0.767484	1.20381	1.27251	1.24965	0.656903	0.699564	0.753625			152.4	0.0747	0.0484	0.0392	0.1386	0.1172	0.0933	0.1471	0.1337	0.1467	0.1309	0.1314	0.1428			152.4	0.037	-0.0067	0.0555	0.0658
576.4	1.08958	1.00918	1.07297	0.778883	0.780993	0.777117	1.57031	1.65974	1.78087	0.700853	0.798626	0.772035			576.4	0.890126	0.837135	0.8517	0.760653	0.764598	0.764555	1.21055	1.27959	1.25851	0.654157	0.697353	0.751675			152.8	0.0765	0.0493	0.0391	0.1387	0.1181	0.0925	0.1487	0.1328	0.1466	0.1313	0.1319	0.1429			152.8	0.037	-0.0066	0.0561	0.0667
576.6	1.08579	1.00552	1.06916	0.776551	0.7786	0.774797	1.57953	1.66945	1.79279	0.699595	0.796568	0.769726			576.6	0.887043	0.834266	0.848936	0.758501	0.762267	0.762111	1.21616	1.28546	1.2651	0.651792	0.695414	0.750357			153.2	0.0758	0.0492	0.0398	0.138	0.1179	0.0932	0.1475	0.1333	0.147	0.1308	0.1318	0.144			153.2	0.0375	-0.0059	0.0561	0.0656
576.8	1.07985	1.0001	1.06329	0.77295	0.775042	0.771388	1.59404	1.68453	1.8115	0.69713	0.793405	0.766738			576.8	0.882443	0.829982	0.844744	0.754768	0.758908	0.758401	1.22462	1.29416	1.27525	0.647978	0.692468	0.747749			153.6	0.0752	0.0486	0.039	0.1385	0.1181	0.0925	0.1493	0.1336	0.1471	0.1327	0.132	0.1414			153.6	0.0386	-0.0065	0.0555	0.0658
577	1.07479	0.995741	1.05853	0.770256	0.772003	0.768594	1.60575	1.69637	1.8273	0.694691	0.791075	0.764577			577	0.878531	0.826813	0.841121	0.751845	0.755744	0.755379	1.23185	1.30146	1.28382	0.644831	0.690215	0.745784			154	0.0758	0.0488	0.0393	0.1385	0.117	0.0917	0.1484	0.1315	0.1465	0.1318	0.1313	0.1425			154	0.0373	-0.0069	0.0557	0.0654
577.2	1.07081	0.992103	1.05451	0.768059	0.769615	0.766367	1.61524	1.70624	1.83992	0.692894	0.789176	0.762946			577.2	0.875485	0.824285	0.838192	0.749582	0.753281	0.752994	1.23745	1.30763	1.29063	0.642474	0.688356	0.744275			154.4	0.0755	0.0487	0.038	0.1395	0.1177	0.0918	0.1475	0.1325	0.147	0.1317	0.1304	0.1429			154.4	0.0369	-0.0071	0.0554	0.0663
577.4	1.06572	0.987296	1.04964	0.765018	0.766647	0.763513	1.6269	1.71835	1.85523	0.690475	0.786959	0.760364			577.4	0.871704	0.820705	0.834681	0.746623	0.750268	0.74991	1.24439	1.31486	1.29893	0.639561	0.685886	0.742134			154.8	0.0753	0.0506	0.0396	0.1386	0.1189	0.0923	0.1476	0.1336	0.1477	0.1309	0.1322	0.1432			154.8	0.0374	-0.0057	0.057	0.066
577.6	1.06196	0.983525	1.04591	0.762628	0.764227	0.761144	1.63644	1.72778	1.8677	0.688895	0.78537	0.758138			577.6	0.868743	0.817826	0.83182	0.744132	0.747796	0.747313	1.24998	1.32094	1.3055	0.63724	0.684164	0.740426			155.2	0.0767	0.0494	0.0386	0.1386	0.1179	0.0924	0.1489	0.1325	0.1472	0.1317	0.131	0.1425			155.2	0.0387	-0.0064	0.0564	0.0678
577.8	1.05677	0.979038	1.04129	0.759708	0.761329	0.758099	1.64833	1.74066	1.88308	0.68638	0.783041	0.755598			577.8	0.864961	0.81444	0.8283	0.741107	0.744921	0.744403	1.25725	1.32829	1.31373	0.634047	0.682005	0.73862			155.6	0.0761	0.0497	0.0396	0.1388	0.1175	0.0933	0.149	0.1334	0.1477	0.1318	0.1322	0.1436			155.6	0.038	-0.0068	0.057	0.0666
578	1.05273	0.975545	1.03747	0.757385	0.758886	0.755721	1.65779	1.75126	1.89573	0.684352	0.781217	0.753738			578	0.862012	0.811629	0.825403	0.73876	0.742547	0.742145	1.26306	1.33438	1.32073	0.63135	0.680258	0.736994			156	0.0756	0.0487	0.0393	0.1398	0.1194	0.0927	0.148	0.134	0.1458	0.1312	0.1309	0.1412			156	0.037	-0.0059	0.0551	0.0666
578.2	1.0469	0.970024	1.03141	0.753911	0.755427	0.752121	1.67217	1.7666	1.91463	0.682141	0.778699	0.750966			578.2	0.857351	0.807448	0.821171	0.73548	0.739092	0.738752	1.27153	1.34394	1.33089	0.628114	0.677305	0.734368			156.4	0.076	0.0507	0.0401	0.1396	0.1185	0.0924	0.1483	0.1331	0.1479	0.1317	0.1318	0.1428			156.4	0.0373	-0.0059	0.0576	0.0671
578.4	1.04199	0.965441	1.02663	0.750942	0.752598	0.749276	1.68366	1.77886	1.93031	0.680158	0.776341	0.748634			578.4	0.853736	0.803888	0.817732	0.732559	0.736119	0.735911	1.2785	1.35184	1.33919	0.625337	0.675104	0.732308			156.8	0.0762	0.0499	0.0399	0.1398	0.1184	0.093	0.1477	0.1328	0.1473	0.1307	0.1323	0.142			156.8	0.0362	-0.0062	0.0565	0.067
578.6	1.03811	0.961815	1.02299	0.74847	0.750374	0.746958	1.69261	1.78847	1.94275	0.678436	0.774339	0.746729			578.6	0.850894	0.801026	0.814987	0.730095	0.733763	0.733564	1.28369	1.35799	1.34593	0.623051	0.673102	0.73073			157.2	0.0763	0.0509	0.0393	0.1397	0.1196	0.0919	0.1477	0.1344	0.1457	0.1302	0.1327	0.1424			157.2	0.0376	-0.0062	0.0563	0.0671
578.8	1.03346	0.957109	1.0183	0.745627	0.747408	0.743825	1.70447	1.80104	1.95834	0.676322	0.772241	0.744425			578.8	0.847196	0.797459	0.81154	0.727208	0.730884	0.730614	1.29045	1.36553	1.35448	0.619744	0.670881	0.728692			157.6	0.0761	0.051	0.0389	0.1396	0.1187	0.0924	0.1476	0.133	0.1465	0.1302	0.1326	0.1432			157.6	0.0366	-0.0051	0.0567	0.0658
579	1.02997	0.95348	1.01456	0.743347	0.744875	0.741303	1.71421	1.81074	1.97073	0.674596	0.770222	0.742281			579	0.844028	0.794621	0.808515	0.724704	0.728623	0.728258	1.29569	1.37146	1.36134	0.616955	0.668943	0.726864			158	0.0769	0.0497	0.0397	0.1397	0.1179	0.093	0.1487	0.1328	0.1471	0.1317	0.132	0.1429			158	0.0379	-0.0066	0.057	0.0682
579.2	1.02531	0.949164	1.00984	0.740534	0.742012	0.738048	1.72578	1.82343	1.98685	0.672604	0.76798	0.739506			579.2	0.840166	0.791157	0.80479	0.721646	0.725676	0.725092	1.30247	1.37883	1.37011	0.613742	0.666676	0.72481			158.4	0.077	0.0497	0.0401	0.1406	0.1173	0.0929	0.1481	0.1323	0.1457	0.1327	0.1305	0.1423			158.4	0.0378	-0.0068	0.0572	0.0675
579.4	1.02154	0.945513	1.00613	0.738179	0.739869	0.735676	1.73524	1.83355	1.99962	0.670742	0.765947	0.737594			579.4	0.837107	0.78818	0.801847	0.719208	0.723159	0.722602	1.30774	1.38498	1.37725	0.611116	0.664864	0.723403			158.8	0.076	0.0513	0.0399	0.1408	0.1197	0.0925	0.1481	0.1337	0.1467	0.1319	0.1319	0.142			158.8	0.0373	-0.0058	0.0569	0.0668
579.6	1.01681	0.941212	1.00133	0.735234	0.736877	0.732816	1.74661	1.84573	2.01502	0.668665	0.763769	0.735111			579.6	0.833499	0.784689	0.798366	0.716267	0.720292	0.719683	1.31364	1.39223	1.38567	0.608154	0.662668	0.721582			159.2	0.076	0.0505	0.0396	0.1402	0.1191	0.0937	0.1479	0.134	0.1472	0.131	0.1321	0.1427			159.2	0.0376	-0.007	0.0573	0.0669
579.8	1.01296	0.937677	0.997541	0.73292	0.734462	0.730592	1.75588	1.85573	2.0272	0.667051	0.762241	0.733154			579.8	0.830483	0.781991	0.795591	0.713791	0.718013	0.717256	1.31826	1.39813	1.39223	0.606019	0.661249	0.719845			159.6	0.0778	0.0519	0.0417	0.1407	0.1193	0.0943	0.1471	0.1337	0.1475	0.1309	0.1323	0.1438			159.6	0.0378	-0.0047	0.0584	0.0683
580	1.00684	0.93224	0.991708	0.72952	0.730922	0.727116	1.7698	1.87094	2.04572	0.664225	0.759869	0.730057			580	0.825815	0.777972	0.791381	0.710232	0.714407	0.71354	1.327	1.40692	1.40203	0.602732	0.659145	0.716738			160	0.0765	0.0495	0.0407	0.1413	0.1177	0.0936	0.1481	0.1333	0.1473	0.1312	0.132	0.143			160	0.0388	-0.0063	0.0568	0.067
580.2	1.00191	0.927895	0.987025	0.7266	0.727893	0.72398	1.78119	1.88278	2.06082	0.661652	0.758175	0.727047			580.2	0.822058	0.774405	0.787826	0.707346	0.71151	0.710452	1.33369	1.4138	1.40982	0.600095	0.65703	0.714454			160.4	0.0766	0.0497	0.0397	0.1389	0.1185	0.0949	0.1474	0.1331	0.1462	0.1302	0.1319	0.1424			160.4	0.0362	-0.0065	0.0566	0.0669
580.4	0.997874	0.924338	0.983284	0.724181	0.725527	0.721494	1.79028	1.89252	2.0729	0.659725	0.757017	0.724936			580.4	0.818992	0.771443	0.785058	0.704855	0.709221	0.707974	1.33896	1.41963	1.41619	0.597864	0.655649	0.712843			160.8	0.0775	0.0519	0.0396	0.1414	0.1204	0.0947	0.1487	0.1332	0.1468	0.1313	0.1315	0.1427			160.8	0.0387	-0.0048	0.0575	0.0673
580.6	0.993325	0.919669	0.978772	0.721234	0.722686	0.718307	1.80183	1.90474	2.08786	0.657667	0.755005	0.722193			580.6	0.815155	0.767874	0.781529	0.701945	0.706283	0.705049	1.34566	1.42699	1.42424	0.59474	0.653783	0.710638			161.2	0.0769	0.0501	0.0408	0.1405	0.119	0.0942	0.1482	0.1324	0.1469	0.1316	0.1318	0.1424			161.2	0.0382	-0.0066	0.0569	0.0683
580.8	0.989711	0.91621	0.975016	0.718966	0.720538	0.715956	1.81082	1.91437	2.10005	0.656094	0.753207	0.720394			580.8	0.812196	0.765233	0.778589	0.699664	0.703861	0.702677	1.35113	1.4325	1.43084	0.591992	0.652191	0.709356			161.6	0.0762	0.0511	0.0406	0.1402	0.1196	0.0945	0.1476	0.1326	0.1475	0.1315	0.1313	0.1444			161.6	0.0378	-0.0055	0.0584	0.0673
581	0.984883	0.911858	0.970417	0.71599	0.717545	0.712918	1.82136	1.92625	2.11495	0.653817	0.751124	0.718037			581	0.808557	0.761904	0.775142	0.696724	0.700881	0.699543	1.3573	1.43965	1.43929	0.588916	0.650285	0.707643			162	0.0766	0.0512	0.0398	0.1405	0.1189	0.0935	0.1473	0.133	0.1468	0.1301	0.1316	0.1419			162	0.0384	-0.0063	0.0575	0.0664
581.2	0.981229	0.908416	0.966816	0.713518	0.715158	0.710599	1.82959	1.93518	2.12726	0.652484	0.749685	0.716139			581.2	0.80564	0.759237	0.772472	0.694399	0.698419	0.697049	1.36235	1.44511	1.44583	0.586713	0.64899	0.70599			162.4	0.0782	0.0524	0.0407	0.1395	0.1192	0.0942	0.1474	0.1338	0.1471	0.1319	0.1323	0.1431			162.4	0.038	-0.0048	0.058	0.0676
581.4	0.975805	0.902884	0.961223	0.70998	0.711653	0.706894	1.84299	1.948	2.14413	0.649857	0.747095	0.713089			581.4	0.800981	0.755224	0.768452	0.69058	0.695079	0.693384	1.36935	1.45275	1.4549	0.583837	0.647336	0.703508			162.8	0.0777	0.0504	0.0406	0.1414	0.119	0.095	0.1484	0.1324	0.1464	0.1322	0.131	0.1426			162.8	0.0383	-0.0065	0.0577	0.0684
581.6	0.971173	0.898533	0.956518	0.706945	0.708603	0.704001	1.85411	1.95914	2.15819	0.64739	0.744599	0.710274			581.6	0.797337	0.75182	0.764757	0.687565	0.692255	0.690471	1.37527	1.45907	1.4628	0.580932	0.645423	0.701184			163.2	0.0781	0.0515	0.0394	0.1415	0.12	0.0945	0.1491	0.1335	0.1464	0.1327	0.1317	0.1424			163.2	0.0379	-0.0048	0.0574	0.0685
581.8	0.967535	0.895077	0.952786	0.704558	0.706153	0.701633	1.86281	1.96837	2.16916	0.645602	0.742398	0.708035			581.8	0.794256	0.749059	0.762017	0.685309	0.6898	0.688091	1.38015	1.46403	1.46938	0.578431	0.644095	0.699462			163.6	0.0788	0.051	0.0408	0.1424	0.1197	0.0948	0.1484	0.1318	0.1466	0.1321	0.1309	0.1425			163.6	0.0397	-0.0056	0.0578	0.0691
582	0.962926	0.890593	0.948023	0.701799	0.703359	0.698593	1.87277	1.97936	2.18332	0.64326	0.740686	0.705607			582	0.790684	0.745615	0.758435	0.682453	0.686658	0.685177	1.3864	1.47005	1.47648	0.575692	0.642269	0.697699			164	0.0769	0.0518	0.0403	0.1411	0.1197	0.0947	0.1472	0.1336	0.1468	0.131	0.1311	0.1422			164	0.0384	-0.0056	0.0579	0.0676
582.2	0.959107	0.887177	0.944151	0.699402	0.701172	0.696392	1.88067	1.98782	2.1949	0.641406	0.739162	0.703504			582.2	0.787796	0.742911	0.755651	0.680036	0.684207	0.682642	1.39126	1.47511	1.48231	0.573673	0.640677	0.696385			164.4	0.0783	0.0523	0.0413	0.1421	0.1211	0.0948	0.149	0.1333	0.147	0.1317	0.1336	0.1422			164.4	0.0385	-0.0048	0.0588	0.0685
582.4	0.954322	0.883063	0.939528	0.696365	0.698455	0.693699	1.89039	1.99823	2.2083	0.639239	0.737099	0.701185			582.4	0.784158	0.73948	0.752347	0.677086	0.6812	0.679964	1.39671	1.48174	1.4896	0.571242	0.639001	0.694468			164.8	0.0764	0.0517	0.0404	0.1402	0.1189	0.0952	0.1484	0.1323	0.1484	0.1313	0.1302	0.1434			164.8	0.0374	-0.0058	0.0592	0.0677
582.6	0.950583	0.87968	0.935904	0.693856	0.696104	0.691519	1.89848	2.00648	2.21849	0.637711	0.735644	0.699136			582.6	0.781278	0.736634	0.749744	0.674831	0.678812	0.677675	1.40117	1.48681	1.49545	0.569322	0.637454	0.692614			165.2	0.079	0.0519	0.0411	0.1428	0.1212	0.0946	0.148	0.133	0.1459	0.1323	0.1324	0.142			165.2	0.039	-0.0045	0.0572	0.0685
582.8	0.945091	0.874561	0.930581	0.690407	0.692676	0.688179	1.91076	2.01736	2.23396	0.635113	0.733079	0.696247			582.8	0.776973	0.732568	0.745891	0.671502	0.67537	0.674421	1.40878	1.49362	1.50431	0.566231	0.635463	0.689481			165.6	0.0791	0.0521	0.0404	0.1419	0.1202	0.0961	0.1484	0.1333	0.1464	0.1331	0.1313	0.1415			165.6	0.0396	-0.0056	0.0587	0.0689
583	0.940608	0.870192	0.926006	0.687363	0.689846	0.685111	1.9202	2.0268	2.24641	0.632859	0.730807	0.693712			583	0.773408	0.72913	0.742457	0.668695	0.672409	0.671595	1.41491	1.49959	1.51106	0.56336	0.633076	0.687117			166	0.0787	0.0528	0.041	0.1425	0.1218	0.0952	0.1488	0.1339	0.1465	0.1316	0.133	0.1427			166	0.0397	-0.004	0.0582	0.0697
583.2	0.937076	0.866775	0.922471	0.685069	0.687536	0.682724	1.9274	2.0345	2.25597	0.63077	0.728685	0.691945			583.2	0.770583	0.726331	0.739783	0.66631	0.670012	0.669207	1.41885	1.50399	1.51609	0.560745	0.631338	0.685756			166.4	0.0773	0.0531	0.0414	0.1407	0.1211	0.0955	0.1482	0.1333	0.1472	0.1317	0.1338	0.1439			166.4	0.0388	-0.0041	0.0585	0.0678
583.4	0.932757	0.862636	0.917729	0.682107	0.684699	0.679738	1.93581	2.04384	2.26766	0.628708	0.726537	0.689526			583.4	0.76723	0.722984	0.736241	0.663429	0.66709	0.666281	1.42363	1.50944	1.52261	0.557975	0.629199	0.684289			166.8	0.0777	0.0523	0.0413	0.1413	0.1196	0.095	0.1486	0.133	0.1474	0.1309	0.1313	0.1429			166.8	0.0383	-0.0056	0.0591	0.0678
583.6	0.929233	0.859222	0.914193	0.679857	0.682493	0.677653	1.94276	2.05125	2.27747	0.626966	0.724564	0.68766			583.6	0.764572	0.720219	0.733512	0.661102	0.664799	0.664002	1.42776	1.51395	1.52753	0.55583	0.62762	0.682803			167.2	0.0781	0.0527	0.0405	0.1405	0.1212	0.0962	0.1472	0.1328	0.1456	0.131	0.1323	0.1422			167.2	0.0379	-0.0049	0.0587	0.0679
583.8	0.924724	0.85495	0.909638	0.676936	0.679739	0.674795	1.95115	2.06005	2.28868	0.625117	0.721796	0.685538			583.8	0.761094	0.716898	0.730152	0.658302	0.661825	0.661181	1.43231	1.51859	1.53349	0.553121	0.625581	0.681181			167.6	0.0797	0.0531	0.0406	0.1426	0.1214	0.0955	0.1482	0.1332	0.1472	0.1325	0.1318	0.142			167.6	0.0395	-0.0056	0.0593	0.0691
584	0.920867	0.85179	0.905904	0.674551	0.677544	0.672561	1.95778	2.06661	2.29778	0.623502	0.719821	0.683816			584	0.758297	0.71421	0.727383	0.655961	0.659513	0.658653	1.43582	1.52223	1.53834	0.550761	0.623956	0.679424			168	0.0793	0.0525	0.0408	0.1419	0.1215	0.0956	0.1477	0.133	0.146	0.1311	0.133	0.1422			168	0.0392	-0.005	0.0591	0.0676
584.2	0.915522	0.84692	0.900531	0.670906	0.673984	0.669044	1.96801	2.07682	2.31123	0.621006	0.716584	0.681149			584.2	0.754104	0.709957	0.723393	0.652514	0.656025	0.655333	1.44182	1.528	1.54516	0.548003	0.621059	0.676524			168.4	0.0807	0.0543	0.0424	0.1428	0.1216	0.0972	0.1486	0.1348	0.1486	0.1319	0.132	0.1435			168.4	0.0399	-0.0043	0.0612	0.0703
584.4	0.912764	0.844484	0.897705	0.669177	0.672358	0.667238	1.97305	2.08143	2.31749	0.619777	0.714948	0.679967			584.4	0.752005	0.707866	0.721443	0.650713	0.654421	0.653613	1.44412	1.53093	1.54863	0.546665	0.619447	0.675642			168.8	0.0791	0.0523	0.0412	0.1411	0.1209	0.0956	0.1481	0.1327	0.1466	0.1308	0.1325	0.1419			168.8	0.0391	-0.0038	0.0584	0.0691
584.6	0.907449	0.839662	0.892496	0.665896	0.668981	0.664141	1.98212	2.09108	2.32893	0.617297	0.712245	0.676758			584.6	0.747843	0.703833	0.717457	0.647491	0.650917	0.65044	1.44933	1.53617	1.55495	0.543127	0.616712	0.673792			169.2	0.0793	0.0534	0.0425	0.1424	0.1216	0.0971	0.1475	0.1339	0.1475	0.1321	0.1326	0.1437			169.2	0.039	-0.0046	0.0598	0.0692
584.8	0.903166	0.835697	0.888065	0.663058	0.666269	0.661485	1.98899	2.099	2.33865	0.614846	0.710088	0.674159			584.8	0.744496	0.700572	0.714067	0.644639	0.64807	0.647573	1.45331	1.54005	1.55995	0.540497	0.614878	0.671826			169.6	0.0789	0.0522	0.0403	0.1425	0.1211	0.0957	0.1469	0.132	0.1471	0.1315	0.1303	0.1423			169.6	0.0386	-0.0054	0.0594	0.0688
585	0.899801	0.83257	0.884695	0.66091	0.664066	0.659164	1.99448	2.10435	2.34634	0.613478	0.708437	0.672399			585	0.741692	0.698041	0.711428	0.642358	0.645732	0.64513	1.45642	1.54317	1.56383	0.538563	0.613444	0.670738			170	0.0794	0.054	0.0425	0.1429	0.1203	0.0976	0.1485	0.1335	0.1475	0.132	0.1317	0.1422			170	0.0397	-0.0049	0.061	0.07
585.2	0.895325	0.828345	0.880366	0.658057	0.661251	0.65615	2.0011	2.11068	2.35487	0.611528	0.706579	0.670007			585.2	0.738175	0.694576	0.707937	0.639642	0.64311	0.642205	1.45946	1.54673	1.56783	0.535605	0.611123	0.668879			170.4	0.0798	0.0534	0.0414	0.1426	0.1212	0.0978	0.1487	0.1326	0.1473	0.1314	0.132	0.1425			170.4	0.04	-0.0044	0.0598	0.0704
585.4	0.89168	0.825107	0.87694	0.655811	0.658937	0.653873	2.00638	2.11577	2.3616	0.610261	0.704475	0.668347			585.4	0.735293	0.691953	0.705216	0.637344	0.640968	0.63996	1.46207	1.54993	1.57164	0.53349	0.60903	0.667408			170.8	0.0795	0.0537	0.0417	0.1422	0.1209	0.0967	0.1462	0.133	0.1467	0.1324	0.1309	0.1425			170.8	0.0393	-0.0035	0.06	0.0699
585.6	0.886228	0.820354	0.871695	0.652481	0.655444	0.650535	2.01404	2.12372	2.37044	0.60828	0.701445	0.666002			585.6	0.731322	0.688014	0.701064	0.634033	0.637501	0.636363	1.46604	1.55414	1.57669	0.530458	0.60649	0.665111			171.2	0.0809	0.0534	0.0414	0.1436	0.121	0.0961	0.1491	0.1314	0.1466	0.1313	0.1313	0.1425			171.2	0.0399	-0.0054	0.06	0.0707
585.8	0.883735	0.817992	0.869092	0.650834	0.653761	0.648724	2.01685	2.12726	2.37485	0.60692	0.700041	0.665197			585.8	0.729193	0.686121	0.699148	0.632192	0.635951	0.634771	1.46773	1.55573	1.57923	0.528552	0.605138	0.664335			171.6	0.0792	0.0522	0.0417	0.1419	0.1199	0.0965	0.1482	0.1319	0.147	0.1302	0.1299	0.1437			171.6	0.0387	-0.0058	0.06	0.0689
586	0.878379	0.813074	0.863999	0.64744	0.650381	0.645318	2.0228	2.13425	2.38349	0.604819	0.697831	0.662841			586	0.725055	0.682277	0.695095	0.628622	0.632621	0.631424	1.4713	1.55941	1.58295	0.525823	0.602722	0.662492			172	0.08	0.0524	0.0422	0.1425	0.1209	0.0981	0.1479	0.133	0.1472	0.1307	0.132	0.1431			172	0.0394	-0.0052	0.0592	0.0694
586.2	0.874017	0.809074	0.859498	0.64459	0.647581	0.642547	2.02739	2.13998	2.39023	0.602161	0.695363	0.660208			586.2	0.721486	0.67919	0.69178	0.625852	0.629851	0.628549	1.47363	1.56209	1.58641	0.522628	0.600412	0.660668			172.4	0.0806	0.0539	0.0418	0.1435	0.1219	0.097	0.1482	0.1333	0.1479	0.1311	0.131	0.1436			172.4	0.0395	-0.0043	0.0607	0.0697
586.4	0.87064	0.805831	0.855963	0.642333	0.645454	0.640401	2.03123	2.14379	2.39533	0.600075	0.693531	0.658239			586.4	0.7187	0.676703	0.689314	0.623515	0.627604	0.626312	1.47537	1.56376	1.58898	0.520139	0.598625	0.659073			172.8	0.081	0.0541	0.0419	0.1429	0.1219	0.0977	0.1478	0.1336	0.1467	0.1327	0.1324	0.1438			172.8	0.0404	-0.0032	0.0599	0.0706
586.6	0.866066	0.801766	0.85192	0.639483	0.642546	0.637686	2.03565	2.14796	2.40218	0.598541	0.690915	0.655752			586.6	0.715049	0.67349	0.6861	0.620693	0.624766	0.623655	1.47719	1.56614	1.59239	0.517539	0.596328	0.656782			173.2	0.0807	0.0531	0.0421	0.1426	0.1217	0.0967	0.1485	0.1324	0.1468	0.1312	0.1311	0.1427			173.2	0.0393	-0.0045	0.0598	0.07
586.8	0.86246	0.798667	0.848733	0.63739	0.640321	0.635492	2.03878	2.1511	2.40781	0.597133	0.688956	0.653697			586.8	0.712117	0.670893	0.683575	0.618424	0.622573	0.621575	1.47811	1.56761	1.59503	0.51552	0.594132	0.654854			173.6	0.0803	0.0526	0.0415	0.1431	0.1213	0.0967	0.1473	0.1327	0.1459	0.1314	0.1322	0.1414			173.6	0.0396	-0.0042	0.058	0.0698
587	0.857402	0.793902	0.843581	0.633933	0.636852	0.632251	2.043	2.15555	2.41463	0.594813	0.686507	0.651086			587	0.708067	0.667109	0.67959	0.615035	0.619375	0.618132	1.48072	1.56963	1.59886	0.512601	0.591817	0.65261			174	0.0799	0.0529	0.0425	0.1427	0.1196	0.0969	0.1469	0.1326	0.1474	0.1308	0.1308	0.1427			174	0.0392	-0.0056	0.0601	0.0697
587.2	0.854887	0.791513	0.841131	0.632381	0.635058	0.630588	2.04499	2.1575	2.41707	0.593473	0.685206	0.649467			587.2	0.705981	0.66516	0.677681	0.613323	0.61794	0.616603	1.48144	1.57071	1.60028	0.51143	0.590387	0.651449			174.4	0.0798	0.0536	0.042	0.1429	0.1214	0.0973	0.1479	0.1323	0.1469	0.131	0.1312	0.1423			174.4	0.0387	-0.0052	0.0606	0.0696
587.4	0.849633	0.786585	0.836076	0.629147	0.631816	0.627434	2.0484	2.16092	2.42238	0.591151	0.682522	0.646044			587.4	0.701907	0.661272	0.673949	0.610019	0.614906	0.613547	1.48244	1.57274	1.60234	0.508591	0.588268	0.648422			174.8	0.0804	0.0538	0.0415	0.1437	0.1217	0.0978	0.1487	0.1325	0.1468	0.1299	0.1311	0.1421			174.8	0.0397	-0.0046	0.0602	0.07
587.6	0.84549	0.782811	0.831982	0.626478	0.629055	0.624773	2.05098	2.1634	2.42636	0.589253	0.6801	0.643102			587.6	0.698354	0.657977	0.670807	0.607283	0.612173	0.610828	1.48327	1.57315	1.60362	0.506035	0.586069	0.645544			175.2	0.0808	0.0547	0.0418	0.1419	0.1216	0.0974	0.1477	0.1332	0.147	0.1314	0.1315	0.1429			175.2	0.0394	-0.0035	0.0607	0.0697
587.8	0.842158	0.779477	0.828656	0.624266	0.626818	0.622546	2.05306	2.16552	2.42971	0.587474	0.678249	0.64077			587.8	0.695622	0.655428	0.668168	0.605215	0.609969	0.608638	1.4841	1.57369	1.60484	0.503828	0.584198	0.643193			175.6	0.081	0.0546	0.043	0.1439	0.122	0.0984	0.1485	0.1326	0.1476	0.1307	0.1318	0.1429			175.6	0.0403	-0.0046	0.0612	0.0701
588	0.838027	0.775476	0.824583	0.621539	0.624183	0.619683	2.05467	2.1673	2.43372	0.58603	0.675843	0.638343			588	0.692334	0.652224	0.664854	0.602374	0.607297	0.605734	1.48484	1.57438	1.60673	0.500997	0.581992	0.64072			176	0.0803	0.0536	0.043	0.1426	0.1217	0.0972	0.1485	0.1323	0.1462	0.132	0.132	0.1429			176	0.0398	-0.0042	0.0604	0.07
588.2	0.834749	0.772308	0.821338	0.619265	0.621889	0.617413	2.05603	2.16851	2.43615	0.584361	0.674163	0.636402			588.2	0.689714	0.649728	0.662416	0.600031	0.605061	0.603435	1.48531	1.57499	1.60768	0.498805	0.58013	0.638779			176.4	0.0803	0.0543	0.0422	0.1423	0.1225	0.0979	0.1467	0.1334	0.1465	0.1309	0.1317	0.1419			176.4	0.0391	-0.0049	0.06	0.0703
588.4	0.82944	0.767681	0.816482	0.616032	0.618643	0.614193	2.05715	2.17027	2.43935	0.581674	0.670732	0.633265			588.4	0.685746	0.645867	0.658717	0.596677	0.601744	0.600372	1.48525	1.5762	1.60905	0.495947	0.57685	0.63552			176.8	0.0816	0.0549	0.0429	0.144	0.123	0.0988	0.1484	0.1335	0.1477	0.1318	0.1322	0.1432			176.8	0.0411	-0.003	0.0616	0.0711
588.6	0.826945	0.765442	0.81403	0.614438	0.616973	0.612588	2.05776	2.17113	2.44062	0.580058	0.669192	0.63131			588.6	0.683765	0.644099	0.656955	0.594926	0.599993	0.598744	1.48546	1.57634	1.60916	0.494261	0.575677	0.63414			177.2	0.0821	0.0541	0.0429	0.1435	0.1214	0.0983	0.1489	0.1336	0.1476	0.1321	0.1317	0.1429			177.2	0.041	-0.004	0.0606	0.0717
588.8	0.821887	0.760483	0.8091	0.611199	0.613706	0.609261	2.05891	2.17192	2.44248	0.57718	0.666533	0.628186			588.8	0.679624	0.640113	0.653079	0.59179	0.597005	0.595495	1.48582	1.57555	1.60954	0.491099	0.573006	0.631581			177.6	0.0814	0.0552	0.043	0.1429	0.1226	0.0987	0.147	0.1322	0.1484	0.131	0.1313	0.1428			177.6	0.0399	-0.0043	0.0619	0.0702
589	0.817762	0.756453	0.804957	0.608471	0.610806	0.606443	2.0592	2.1723	2.44352	0.574804	0.665021	0.625115			589	0.676224	0.637106	0.649866	0.589205	0.594137	0.592786	1.48498	1.57481	1.60912	0.488794	0.57064	0.628567			178	0.0817	0.054	0.0429	0.1433	0.1226	0.0988	0.1486	0.1324	0.1467	0.1324	0.1317	0.1424			178	0.0404	-0.0046	0.0606	0.0704
589.2	0.81443	0.753359	0.801631	0.606358	0.608443	0.604306	2.05987	2.17265	2.44416	0.573111	0.663366	0.622933			589.2	0.673457	0.634759	0.647224	0.587113	0.591882	0.590564	1.48444	1.57444	1.60881	0.48668	0.568692	0.626551			178.4	0.0816	0.0551	0.0427	0.1439	0.1225	0.0993	0.1481	0.1342	0.1474	0.1321	0.1331	0.143			178.4	0.0401	-0.0037	0.0615	0.071
589.4	0.810341	0.749446	0.797532	0.603832	0.605601	0.601574	2.05892	2.1719	2.44445	0.570716	0.660778	0.6202			589.4	0.670183	0.631441	0.644155	0.584408	0.589231	0.587955	1.4829	1.57312	1.60783	0.483905	0.566422	0.623936			178.8	0.0813	0.0544	0.043	0.1433	0.1224	0.0981	0.1482	0.1333	0.1465	0.131	0.1323	0.1422			178.8	0.04	-0.0036	0.0607	0.0702
589.6	0.807121	0.746392	0.794191	0.60171	0.60348	0.599346	2.05823	2.17142	2.44467	0.569112	0.658927	0.6184			589.6	0.667625	0.628835	0.641692	0.582178	0.587045	0.58579	1.48183	1.57208	1.60737	0.481865	0.564484	0.622363			179.2	0.081	0.0547	0.0422	0.1435	0.122	0.0991	0.1477	0.1323	0.1468	0.1308	0.1316	0.1425			179.2	0.0407	-0.0038	0.0614	0.071
589.8	0.802055	0.741956	0.789264	0.598491	0.600293	0.596006	2.0569	2.17026	2.44428	0.566808	0.655927	0.615244			589.8	0.663526	0.625031	0.637839	0.579027	0.58383	0.58278	1.48072	1.57021	1.60575	0.479452	0.561951	0.619527			179.6	0.0822	0.054	0.0434	0.1434	0.1221	0.0981	0.1475	0.1345	0.1475	0.1304	0.1317	0.1416			179.6	0.0411	-0.0037	0.0601	0.0713
590	0.799577	0.739618	0.786669	0.596833	0.598794	0.594305	2.05621	2.16947	2.44325	0.565307	0.654449	0.613761			590	0.661533	0.623217	0.635984	0.577369	0.582235	0.580981	1.48009	1.56898	1.60458	0.478132	0.560616	0.618552			180	0.0814	0.0556	0.0429	0.1426	0.1226	0.0998	0.1477	0.1336	0.1484	0.1318	0.1329	0.1425			180	0.0403	-0.0036	0.0619	0.0709
590.2	0.794734	0.734753	0.781614	0.593384	0.595602	0.590926	2.05457	2.16708	2.44064	0.562028	0.652085	0.610648			590.2	0.657405	0.61941	0.632031	0.574211	0.578973	0.577618	1.47846	1.56652	1.60227	0.474771	0.55814	0.615273			180.4	0.0817	0.0548	0.0428	0.1437	0.1238	0.0983	0.1475	0.1332	0.1464	0.1309	0.1317	0.1422			180.4	0.0397	-0.0034	0.0605	0.07
590.4	0.790523	0.730917	0.777629	0.590627	0.592875	0.588311	2.05298	2.16468	2.43823	0.559969	0.64932	0.607788			590.4	0.654086	0.616409	0.628891	0.571557	0.57625	0.574932	1.47608	1.56433	1.59999	0.472005	0.555522	0.612947			180.8	0.082	0.0559	0.0438	0.1433	0.1229	0.0998	0.1484	0.1333	0.1477	0.1318	0.133	0.1424			180.8	0.0404	-0.003	0.0624	0.0711
590.6	0.78723	0.727859	0.774442	0.588478	0.590741	0.586179	2.05137	2.16319	2.4366	0.558487	0.64705	0.605691			590.6	0.651512	0.614033	0.626299	0.569567	0.574076	0.572873	1.474	1.56242	1.59855	0.469868	0.553536	0.611396			181.2	0.0809	0.0544	0.0426	0.143	0.1223	0.0987	0.1483	0.1325	0.1475	0.1309	0.1315	0.1423			181.2	0.0402	-0.0041	0.061	0.0707
590.8	0.783172	0.724194	0.770409	0.585748	0.588042	0.583454	2.0487	2.16054	2.43363	0.556276	0.644573	0.603552			590.8	0.648176	0.611126	0.623179	0.566974	0.571333	0.570102	1.4717	1.55991	1.59671	0.467921	0.550596	0.609357			181.6	0.0819	0.0551	0.0432	0.1445	0.1219	0.0989	0.1481	0.1329	0.1466	0.1318	0.1306	0.1417			181.6	0.0415	-0.0037	0.0611	0.0717
591	0.779734	0.721143	0.767078	0.583562	0.585831	0.581432	2.04641	2.15818	2.43092	0.554798	0.64269	0.601878			591	0.645395	0.608656	0.620692	0.564798	0.569137	0.567778	1.46945	1.55802	1.595	0.466728	0.548672	0.607319			182	0.0813	0.0541	0.0446	0.143	0.1229	0.0996	0.1471	0.1329	0.148	0.1313	0.1311	0.1434			182	0.0404	-0.0044	0.062	0.0703
591.2	0.774703	0.716529	0.761948	0.580351	0.582295	0.578178	2.04186	2.15422	2.42622	0.551641	0.639103	0.599082			591.2	0.641474	0.60508	0.617074	0.561508	0.565891	0.564421	1.46579	1.55516	1.59093	0.4646	0.545551	0.604394			182.4	0.0822	0.0566	0.042	0.1424	0.1237	0.0984	0.1476	0.1338	0.1461	0.1309	0.1319	0.1429			182.4	0.0402	-0.0029	0.0622	0.0719
591.4	0.770354	0.712669	0.757661	0.577705	0.579638	0.575388	2.03823	2.15039	2.42211	0.549701	0.636262	0.596265			591.4	0.637939	0.602013	0.61387	0.55891	0.563105	0.561636	1.46292	1.55167	1.58787	0.46251	0.542749	0.602378			182.8	0.0816	0.0552	0.0428	0.1438	0.1239	0.1008	0.1472	0.1345	0.1477	0.1306	0.1337	0.1426			182.8	0.0401	-0.0028	0.0609	0.0714
591.6	0.766804	0.709575	0.754193	0.575512	0.577455	0.57319	2.03486	2.14738	2.41868	0.547836	0.634078	0.594041			591.6	0.635159	0.599525	0.611454	0.55677	0.560965	0.55944	1.46047	1.54882	1.58486	0.460499	0.540978	0.600716			183.2	0.0831	0.0568	0.044	0.1437	0.123	0.0996	0.1481	0.1337	0.1472	0.1324	0.1318	0.1429			183.2	0.0414	-0.0028	0.0632	0.0721
591.8	0.762676	0.705787	0.750187	0.572669	0.574691	0.570528	2.03093	2.14307	2.41387	0.54541	0.631244	0.591224			591.8	0.631963	0.596579	0.608335	0.554033	0.558215	0.556592	1.45731	1.5448	1.58178	0.458223	0.53867	0.598035			183.6	0.0811	0.056	0.0423	0.1434	0.122	0.0995	0.147	0.1325	0.1456	0.1307	0.1324	0.1424			183.6	0.0397	-0.003	0.062	0.0709
592	0.759518	0.702855	0.747048	0.570484	0.57239	0.568332	2.02711	2.13962	2.41003	0.543552	0.628909	0.589318			592	0.629345	0.594183	0.605731	0.551752	0.55592	0.554429	1.45424	1.54186	1.5787	0.456385	0.5366	0.595443			184	0.0837	0.0566	0.0444	0.1444	0.1228	0.1009	0.1479	0.1342	0.1478	0.1321	0.1318	0.1428			184	0.0406	-0.0032	0.0632	0.0723
592.2	0.755421	0.699047	0.743157	0.567761	0.569774	0.565571	2.0213	2.13391	2.40491	0.541825	0.62617	0.586564			592.2	0.625952	0.591262	0.602733	0.548997	0.553343	0.551704	1.45003	1.53791	1.5754	0.454744	0.534361	0.592385			184.4	0.0824	0.0561	0.0429	0.1449	0.1239	0.0996	0.1471	0.1337	0.1461	0.1308	0.1332	0.1412			184.4	0.0404	-0.0029	0.0615	0.0721
592.4	0.752242	0.69606	0.739921	0.565581	0.567656	0.563573	2.01694	2.12933	2.40114	0.540149	0.623932	0.584213			592.4	0.62339	0.58879	0.600188	0.546871	0.551319	0.549397	1.44691	1.53443	1.57258	0.452914	0.532649	0.589793			184.8	0.0836	0.056	0.0439	0.1443	0.1234	0.0992	0.1489	0.1322	0.1473	0.1323	0.1311	0.1424			184.8	0.0408	-0.0032	0.0622	0.0728
592.6	0.747069	0.691569	0.73496	0.562184	0.564543	0.560244	2.01066	2.1231	2.39391	0.537718	0.621057	0.581163			592.6	0.619578	0.584998	0.596543	0.543574	0.5481	0.546044	1.44188	1.52929	1.56797	0.450816	0.529725	0.586824			185.2	0.0824	0.0563	0.0434	0.144	0.1242	0.0996	0.1463	0.1331	0.1467	0.1312	0.1317	0.1422			185.2	0.0403	-0.0027	0.0617	0.0722
592.8	0.742971	0.687874	0.731052	0.559435	0.56177	0.557668	2.00489	2.11628	2.38716	0.535332	0.618303	0.578706			592.8	0.616289	0.582072	0.593548	0.541045	0.545381	0.54325	1.43725	1.52447	1.56347	0.44891	0.527473	0.584032			185.6	0.0824	0.0564	0.0432	0.144	0.1231	0.1006	0.1485	0.1326	0.146	0.1307	0.1309	0.143			185.6	0.0405	-0.003	0.0627	0.0726
593	0.739679	0.684996	0.728162	0.55717	0.559537	0.555653	2.00012	2.11081	2.38195	0.53345	0.616657	0.576672			593	0.61378	0.579671	0.591163	0.538898	0.543098	0.541034	1.43355	1.52088	1.56004	0.447126	0.525689	0.581927			186	0.0826	0.0567	0.0431	0.1437	0.1236	0.1001	0.1473	0.1344	0.147	0.1318	0.1328	0.1424			186	0.0416	-0.0025	0.0623	0.073
593.2	0.735529	0.68138	0.724174	0.554468	0.556811	0.552954	1.99376	2.10394	2.37449	0.531345	0.614056	0.574293			593.2	0.610519	0.576611	0.587959	0.536116	0.540537	0.538272	1.42844	1.51619	1.55525	0.445169	0.523472	0.579572			186.4	0.0829	0.0561	0.044	0.1451	0.1226	0.1002	0.1484	0.132	0.1452	0.1315	0.131	0.1425			186.4	0.0409	-0.0039	0.0627	0.0718
593.4	0.732314	0.678639	0.721083	0.552198	0.554778	0.550859	1.98841	2.09817	2.3686	0.529654	0.611843	0.572438			593.4	0.608052	0.574217	0.585526	0.533927	0.538426	0.53615	1.42403	1.51241	1.55136	0.443526	0.521497	0.57772			186.8	0.0836	0.0567	0.0435	0.1433	0.124	0.1002	0.1467	0.1333	0.1474	0.1314	0.1337	0.142			186.8	0.0408	-0.0026	0.0627	0.0713
593.6	0.727673	0.674394	0.716555	0.549063	0.551599	0.547535	1.97928	2.08975	2.35994	0.527592	0.607941	0.569256			593.6	0.604192	0.570671	0.581891	0.530734	0.535171	0.532906	1.41734	1.50616	1.54577	0.44188	0.518138	0.574126			187.2	0.084	0.0562	0.0434	0.1437	0.1238	0.0999	0.1479	0.1313	0.1468	0.1319	0.1314	0.1421			187.2	0.0403	-0.0034	0.0627	0.0715
593.8	0.72527	0.672098	0.71435	0.547461	0.549801	0.545714	1.97502	2.08547	2.35515	0.525615	0.606074	0.568096			593.8	0.602236	0.56895	0.580131	0.52908	0.533364	0.531293	1.41429	1.50284	1.54229	0.440589	0.516673	0.57269			187.6	0.0848	0.0569	0.0443	0.1447	0.1229	0.1013	0.1479	0.1316	0.1473	0.1313	0.1317	0.1424			187.6	0.0423	-0.0023	0.0638	0.0725
594	0.720301	0.667654	0.709557	0.544361	0.546493	0.542724	1.96582	2.07579	2.34486	0.522574	0.602847	0.564342			594	0.598311	0.565178	0.57644	0.525755	0.529984	0.528051	1.40776	1.49549	1.53496	0.437949	0.514031	0.568808			188	0.0832	0.0559	0.0427	0.1448	0.1229	0.1	0.148	0.1331	0.1461	0.1322	0.1318	0.1424			188	0.0414	-0.0036	0.0621	0.0721
594.2	0.716317	0.663873	0.705506	0.541619	0.543824	0.5399	1.95764	2.06706	2.3359	0.519786	0.600273	0.561472			594.2	0.595219	0.562242	0.573362	0.522907	0.527296	0.525395	1.40196	1.48912	1.52813	0.435291	0.511707	0.566249			188.4	0.0831	0.0565	0.0454	0.1434	0.1233	0.1014	0.1473	0.1322	0.1472	0.1305	0.131	0.1429			188.4	0.0407	-0.003	0.0631	0.0722
594.4	0.713087	0.660963	0.702437	0.539435	0.541747	0.537651	1.95148	2.05968	2.32842	0.517888	0.598447	0.559328			594.4	0.592685	0.559761	0.570789	0.520592	0.525088	0.523347	1.39734	1.48388	1.52271	0.433144	0.510437	0.564295			188.8	0.0829	0.0562	0.0435	0.1446	0.1239	0.0999	0.1476	0.1332	0.1474	0.1307	0.1317	0.1421			188.8	0.0402	-0.003	0.0622	0.0713
594.6	0.709333	0.657507	0.698628	0.536687	0.539016	0.535146	1.94304	2.05115	2.31836	0.515719	0.595958	0.557107			594.6	0.589435	0.556761	0.567671	0.517935	0.522407	0.520788	1.39088	1.47739	1.51652	0.430813	0.507664	0.561904			189.2	0.0836	0.0573	0.0444	0.1457	0.1241	0.1004	0.149	0.1341	0.1469	0.1316	0.1324	0.1423			189.2	0.0418	-0.0023	0.0626	0.0734
594.8	0.706341	0.654733	0.695673	0.534582	0.536868	0.53304	1.93624	2.04436	2.31031	0.513938	0.593873	0.55538			594.8	0.586765	0.554458	0.565167	0.515846	0.520312	0.518798	1.38581	1.47243	1.51092	0.429258	0.505722	0.559566			189.6	0.0838	0.0572	0.0456	0.1434	0.1248	0.1011	0.1481	0.1325	0.1478	0.1314	0.1323	0.141			189.6	0.0408	-0.0026	0.0632	0.0717
595	0.701787	0.650726	0.691274	0.531277	0.533619	0.529913	1.92564	2.0329	2.29762	0.511835	0.590631	0.552934			595	0.58305	0.550894	0.561397	0.512654	0.517221	0.515706	1.37771	1.4643	1.50214	0.427508	0.503022	0.556564			190	0.0845	0.0575	0.0447	0.1442	0.123	0.1012	0.1477	0.1337	0.1466	0.1327	0.1313	0.1428			190	0.0419	-0.003	0.0639	0.0738
595.2	0.699343	0.648491	0.689016	0.52966	0.531924	0.528281	1.92059	2.02695	2.29104	0.511078	0.589041	0.551345			595.2	0.58136	0.549102	0.559667	0.51111	0.515649	0.51401	1.37358	1.46006	1.498	0.426566	0.501867	0.554925			190.4	0.0848	0.0574	0.0445	0.1446	0.123	0.101	0.1482	0.1335	0.1477	0.1312	0.1315	0.1426			190.4	0.0424	-0.0028	0.0636	0.073
595.4	0.694685	0.644258	0.684417	0.526389	0.52886	0.52511	1.90973	2.015	2.27733	0.50835	0.585951	0.54825			595.4	0.577765	0.545387	0.556154	0.508207	0.512264	0.510619	1.36604	1.45105	1.48918	0.42342	0.499165	0.551909			190.8	0.0828	0.0572	0.0439	0.144	0.1246	0.101	0.1479	0.1326	0.1456	0.131	0.132	0.1417			190.8	0.0403	-0.0028	0.0627	0.0733
595.6	0.690963	0.640808	0.680596	0.523646	0.526195	0.522309	1.90026	2.00493	2.26606	0.505775	0.582574	0.545685			595.6	0.57475	0.542413	0.553203	0.505418	0.50966	0.508178	1.35852	1.44366	1.48207	0.421334	0.496372	0.549337			191.2	0.0847	0.057	0.0452	0.1456	0.1247	0.1012	0.1489	0.1336	0.1469	0.1308	0.1319	0.1418			191.2	0.0416	-0.0017	0.0626	0.0729
595.8	0.688036	0.63806	0.67758	0.521542	0.524072	0.520154	1.89275	1.99725	2.25655	0.503489	0.579747	0.543383			595.8	0.5723	0.540124	0.550875	0.503321	0.507547	0.506101	1.35285	1.43784	1.47644	0.419614	0.494033	0.547083			191.6	0.0844	0.0571	0.0459	0.1444	0.1241	0.102	0.1481	0.1327	0.1471	0.1326	0.1318	0.1423			191.6	0.0411	-0.0023	0.0632	0.073
596	0.684333	0.634547	0.67392	0.518925	0.521431	0.517551	1.88293	1.98648	2.24503	0.50113	0.577044	0.540739			596	0.569105	0.537249	0.547904	0.500705	0.504968	0.503318	1.34582	1.42998	1.46871	0.41743	0.49177	0.544562			192	0.0838	0.0572	0.043	0.145	0.1243	0.1013	0.148	0.1343	0.1468	0.1313	0.1332	0.1422			192	0.0413	-0.002	0.0621	0.073
596.2	0.681288	0.631677	0.670854	0.51688	0.519325	0.5154	1.87474	1.97842	2.2359	0.499269	0.575076	0.538865			596.2	0.566598	0.534864	0.545531	0.498474	0.502985	0.501146	1.34012	1.42377	1.46271	0.415505	0.4901	0.542823			192.4	0.0842	0.0583	0.0443	0.145	0.1239	0.1009	0.1471	0.1336	0.1461	0.1321	0.131	0.1414			192.4	0.0419	-0.0021	0.0637	0.0726
596.4	0.676672	0.627653	0.666093	0.513571	0.516027	0.512035	1.86162	1.96523	2.22122	0.496489	0.571926	0.535747			596.4	0.562964	0.531426	0.541961	0.495421	0.499997	0.49806	1.33092	1.4143	1.45271	0.413223	0.487006	0.539406			192.8	0.0844	0.0576	0.0446	0.1447	0.1244	0.1021	0.1472	0.1329	0.1473	0.1322	0.1325	0.1426			192.8	0.0418	-0.0035	0.0643	0.0737
596.6	0.672891	0.62393	0.662423	0.511139	0.513305	0.50943	1.85119	1.95404	2.20867	0.494245	0.568952	0.533427			596.6	0.559917	0.528573	0.538988	0.492948	0.49743	0.495441	1.32365	1.40596	1.44525	0.411078	0.484696	0.536448			193.2	0.0843	0.0575	0.0442	0.1456	0.1242	0.1012	0.1474	0.1342	0.1464	0.1311	0.1315	0.1422			193.2	0.0426	-0.0019	0.0627	0.073
596.8	0.669793	0.621043	0.659473	0.509069	0.510994	0.507331	1.84251	1.94525	2.19855	0.492123	0.566569	0.531646			596.8	0.557469	0.526234	0.536802	0.490949	0.495245	0.49337	1.31781	1.39951	1.43875	0.409552	0.482894	0.534208			193.6	0.0854	0.0576	0.0445	0.146	0.1255	0.1008	0.1484	0.1334	0.1473	0.132	0.1323	0.1418			193.6	0.0425	-0.001	0.0626	0.0746
597	0.66613	0.617596	0.655656	0.506419	0.508359	0.504752	1.83219	1.93339	2.18582	0.490014	0.564256	0.529015			597	0.554514	0.523345	0.533974	0.488314	0.492658	0.490765	1.31074	1.39127	1.43026	0.407509	0.481089	0.5317			194	0.0848	0.0581	0.0441	0.1461	0.125	0.1009	0.1484	0.1323	0.1466	0.1314	0.1325	0.1418			194	0.0421	-0.0018	0.0634	0.0733
597.2	0.663177	0.615055	0.652587	0.504413	0.506321	0.502702	1.82376	1.9239	2.17616	0.488389	0.562478	0.526757			597.2	0.552141	0.52102	0.53156	0.486246	0.490718	0.488581	1.30451	1.38459	1.42392	0.406161	0.479493	0.52936			194.4	0.0844	0.0576	0.045	0.145	0.1237	0.101	0.1469	0.1334	0.1471	0.1314	0.1321	0.1413			194.4	0.0408	-0.002	0.0631	0.0743
597.4	0.658612	0.611212	0.64807	0.501233	0.503279	0.499522	1.81095	1.90991	2.16028	0.485764	0.558954	0.524055			597.4	0.548642	0.517832	0.528211	0.483288	0.48766	0.485439	1.29504	1.37484	1.41489	0.404022	0.476669	0.526289			194.8	0.0848	0.0582	0.0444	0.1458	0.1253	0.1016	0.1482	0.1341	0.1473	0.1311	0.1332	0.142			194.8	0.0423	-0.0025	0.0635	0.0732
597.6	0.656436	0.609274	0.645928	0.499663	0.501665	0.497997	1.80451	1.90283	2.15203	0.484036	0.557489	0.522316			597.6	0.546671	0.51621	0.526588	0.481906	0.486175	0.484065	1.29037	1.37007	1.40945	0.402994	0.475366	0.524669			195.2	0.0842	0.0565	0.0449	0.1459	0.1235	0.1021	0.1491	0.1328	0.1482	0.1321	0.1312	0.1422			195.2	0.0424	-0.0025	0.0631	0.0739
597.8	0.652053	0.605022	0.641505	0.496603	0.498642	0.494769	1.79083	1.88819	2.13647	0.481384	0.553841	0.519414			597.8	0.543172	0.512807	0.523047	0.47902	0.483264	0.481043	1.28076	1.35967	1.39902	0.401378	0.471965	0.521146			195.6	0.0848	0.0594	0.0446	0.1455	0.1257	0.1021	0.1471	0.1338	0.1471	0.1309	0.1342	0.1428			195.6	0.0426	-0.0006	0.0639	0.0725
598	0.648467	0.601398	0.637862	0.49396	0.496269	0.492291	1.77915	1.87576	2.12328	0.478751	0.551096	0.517196			598	0.540397	0.509936	0.520209	0.47642	0.480704	0.478508	1.2728	1.35105	1.39057	0.399558	0.46975	0.518649			196	0.0844	0.0575	0.0456	0.1452	0.125	0.1027	0.1478	0.1338	0.148	0.1302	0.1312	0.1424			196	0.0418	-0.0015	0.0634	0.0739
598.2	0.645468	0.598553	0.635024	0.49197	0.494293	0.490227	1.76996	1.86573	2.11231	0.476445	0.549057	0.515518			598.2	0.538013	0.507672	0.518071	0.47433	0.478644	0.476421	1.26645	1.34392	1.38386	0.398015	0.467955	0.516762			196.4	0.0846	0.0585	0.0451	0.1456	0.1247	0.1021	0.1467	0.1333	0.1465	0.1314	0.1326	0.1426			196.4	0.042	-0.002	0.0642	0.0734
598.4	0.641839	0.595144	0.631352	0.489373	0.49172	0.487646	1.75846	1.85322	2.09864	0.473694	0.54649	0.512733			598.4	0.534867	0.50502	0.515146	0.471667	0.476133	0.473732	1.25817	1.33479	1.37542	0.395758	0.465151	0.513693			196.8	0.0855	0.0577	0.0435	0.1466	0.1247	0.1017	0.149	0.1334	0.1465	0.131	0.1316	0.1413			196.8	0.0422	-0.0026	0.0632	0.0744
598.6	0.638989	0.592493	0.628362	0.487351	0.489653	0.485679	1.74918	1.84315	2.08794	0.471483	0.543907	0.510329			598.6	0.532371	0.502913	0.512791	0.469573	0.474236	0.4718	1.25157	1.32762	1.36862	0.394183	0.462488	0.511533			197.2	0.085	0.0586	0.0451	0.1436	0.1247	0.1025	0.1473	0.1342	0.1472	0.1304	0.1328	0.1435			197.2	0.0414	-0.0023	0.0643	0.0727
598.8	0.634552	0.588479	0.624112	0.484532	0.486536	0.482606	1.73511	1.82877	2.07059	0.468397	0.541045	0.507681			598.8	0.528492	0.499542	0.509325	0.46669	0.471476	0.46863	1.24178	1.31695	1.35672	0.391772	0.460123	0.509029			197.6	0.0852	0.0595	0.0444	0.146	0.125	0.1024	0.1478	0.1335	0.1475	0.1309	0.1326	0.1422			197.6	0.0417	-0.0014	0.0645	0.0743
599	0.632428	0.58645	0.622021	0.483051	0.48499	0.481171	1.7276	1.82126	2.06216	0.466737	0.539599	0.506357			599	0.526804	0.497868	0.50757	0.465138	0.470005	0.467098	1.23649	1.31191	1.35143	0.390434	0.45901	0.507179			198	0.0838	0.0585	0.0449	0.145	0.1247	0.1032	0.148	0.1324	0.1465	0.1311	0.1317	0.1429			198	0.0419	-0.0014	0.0645	0.0736
599.2	0.628002	0.582371	0.617769	0.479998	0.482122	0.478019	1.71336	1.8062	2.0447	0.464226	0.536696	0.503947			599.2	0.523421	0.494492	0.504013	0.462066	0.46704	0.464129	1.22684	1.3014	1.3397	0.388303	0.456255	0.504059			198.4	0.0859	0.0591	0.0445	0.1462	0.1261	0.1023	0.1478	0.1341	0.1463	0.1311	0.1325	0.1414			198.4	0.0421	-0.0012	0.0636	0.0738
599.4	0.62452	0.578867	0.614223	0.477567	0.479766	0.475515	1.70166	1.79361	2.02967	0.46198	0.534226	0.501303			599.4	0.520492	0.491914	0.501097	0.459699	0.464618	0.461709	1.21855	1.2923	1.33005	0.386808	0.453739	0.50105			198.8	0.0853	0.0584	0.0453	0.1452	0.1245	0.1031	0.1482	0.1324	0.1472	0.1308	0.1313	0.1431			198.8	0.0415	-0.0013	0.0647	0.0739
599.6	0.621614	0.57617	0.611549	0.475633	0.477809	0.473487	1.69221	1.78365	2.01742	0.459922	0.532122	0.499175			599.6	0.518019	0.489791	0.498909	0.45766	0.462654	0.459794	1.21194	1.28523	1.32229	0.38513	0.451626	0.498912			199.2	0.0864	0.0589	0.0459	0.1457	0.1243	0.1034	0.1486	0.1336	0.1467	0.1319	0.133	0.1424			199.2	0.0427	-0.0021	0.065	0.073
599.8	0.617328	0.572215	0.60706	0.47272	0.47476	0.470519	1.67753	1.76862	2.00083	0.457014	0.528761	0.496095			599.8	0.514723	0.486472	0.495607	0.454784	0.459804	0.456882	1.20132	1.27477	1.30995	0.382471	0.448946	0.496178			199.6	0.087	0.0583	0.0442	0.1469	0.1244	0.1022	0.1489	0.1322	0.1464	0.1323	0.1321	0.1407			199.6	0.0424	-0.0013	0.0631	0.0746
600	0.615081	0.57023	0.604939	0.471298	0.473181	0.468984	1.66991	1.76106	1.99306	0.455754	0.526802	0.494627			600	0.512998	0.484807	0.493978	0.453235	0.45826	0.455385	1.19581	1.26953	1.30436	0.381582	0.447157	0.494465			200	0.0856	0.0589	0.0443	0.1461	0.1267	0.1016	0.1491	0.134	0.1462	0.1318	0.1336	0.1417			200	0.0424	-0.0013	0.0628	0.0746
600.2	0.61078	0.566401	0.600616	0.468413	0.470279	0.465999	1.65599	1.74615	1.97528	0.452874	0.523459	0.491418			600.2	0.509625	0.481537	0.490499	0.450299	0.455474	0.452588	1.18548	1.25877	1.29318	0.379281	0.444371	0.490732			200.4	0.0857	0.0588	0.0456	0.1466	0.1251	0.1032	0.1487	0.1334	0.1476	0.1329	0.1322	0.1433			200.4	0.042	-0.0012	0.0646	0.0749
600.4	0.60738	0.563096	0.597313	0.465775	0.467827	0.463477	1.64366	1.73329	1.95956	0.45087	0.52092	0.489137			600.4	0.50687	0.47898	0.487964	0.447904	0.453044	0.450211	1.1772	1.24984	1.28375	0.377529	0.44205	0.487902			200.8	0.0851	0.059	0.0466	0.145	0.1255	0.1041	0.1472	0.1333	0.1473	0.1308	0.1325	0.1431			200.8	0.0418	-0.0009	0.0649	0.0721
600.6	0.604595	0.560317	0.594724	0.463754	0.465885	0.461385	1.63355	1.72292	1.947	0.449206	0.518793	0.487294			600.6	0.504697	0.476807	0.485778	0.445972	0.451117	0.448342	1.17063	1.24273	1.27583	0.376139	0.440263	0.485842			201.2	0.0871	0.0588	0.0459	0.1474	0.1249	0.1033	0.149	0.1328	0.1471	0.1322	0.1315	0.1417			201.2	0.0436	-0.0018	0.0648	0.0756
600.8	0.601127	0.557083	0.591499	0.461166	0.463372	0.458947	1.62113	1.71017	1.93191	0.4469	0.51624	0.484578			600.8	0.501835	0.474123	0.483096	0.443396	0.448722	0.44598	1.16195	1.233	1.26583	0.373945	0.438221	0.483289			201.6	0.0865	0.0597	0.0456	0.1459	0.1261	0.1035	0.1491	0.1348	0.1471	0.1323	0.1335	0.143			201.6	0.0429	-0.0005	0.0648	0.0749
601	0.598361	0.554456	0.588918	0.459069	0.461487	0.456927	1.61136	1.70016	1.91978	0.44524	0.514013	0.482555			601	0.499638	0.472099	0.480901	0.44141	0.446855	0.444049	1.15486	1.22532	1.25833	0.372297	0.436709	0.481373			202	0.0868	0.0592	0.0464	0.1469	0.1248	0.104	0.149	0.1337	0.1479	0.1326	0.1327	0.1429			202	0.0428	-0.0017	0.0652	0.0754
601.2	0.594245	0.550727	0.584784	0.456248	0.458403	0.453909	1.59677	1.68485	1.90194	0.442268	0.510846	0.479425			601.2	0.496431	0.468974	0.477771	0.438378	0.443741	0.441164	1.1445	1.21444	1.24767	0.369371	0.433859	0.478696			202.4	0.086	0.0594	0.044	0.1457	0.1244	0.103	0.1481	0.1336	0.1468	0.1311	0.1323	0.142			202.4	0.0435	-0.0009	0.064	0.0753
601.4	0.592278	0.548901	0.582722	0.454697	0.456843	0.452442	1.5893	1.67726	1.89295	0.441023	0.509517	0.477881			601.4	0.494831	0.467439	0.476162	0.436908	0.44241	0.43982	1.13925	1.20918	1.2424	0.368062	0.432413	0.477147			202.8	0.0881	0.0602	0.0457	0.1474	0.1258	0.1042	0.1491	0.1328	0.1471	0.1341	0.1321	0.1424			202.8	0.0422	-0.0018	0.0657	0.0754
601.6	0.588282	0.545134	0.578532	0.451926	0.453843	0.4496	1.57448	1.66148	1.87557	0.438183	0.506082	0.474394			601.6	0.491814	0.464306	0.47284	0.434266	0.439322	0.437162	1.12928	1.19914	1.23052	0.366133	0.429387	0.474034			203.2	0.0856	0.06	0.0461	0.1457	0.1243	0.1046	0.1469	0.1335	0.1473	0.1298	0.1321	0.1443			203.2	0.0423	-0.0003	0.0664	0.0746
601.8	0.58479	0.54189	0.575297	0.449557	0.451485	0.447286	1.56206	1.64824	1.86061	0.436232	0.503845	0.472426			601.8	0.489083	0.461725	0.47027	0.431993	0.437	0.434762	1.12066	1.1904	1.22065	0.364805	0.427505	0.471932			203.6	0.0873	0.0596	0.0454	0.1471	0.1243	0.1028	0.1482	0.1343	0.1459	0.1315	0.1328	0.1409			203.6	0.0428	-0.002	0.0645	0.0741
602	0.582146	0.539285	0.572642	0.447655	0.449711	0.44527	1.55214	1.63729	1.84902	0.434499	0.502065	0.470992			602	0.486903	0.459683	0.468275	0.430268	0.435053	0.432979	1.11396	1.18316	1.21325	0.363506	0.426133	0.470024			204	0.0861	0.0594	0.0463	0.1461	0.125	0.104	0.1485	0.1321	0.1469	0.1321	0.1313	0.1432			204	0.0439	-0.0012	0.0653	0.0748
602.2	0.578067	0.535627	0.568694	0.444625	0.446798	0.442401	1.537	1.62249	1.83115	0.431885	0.498683	0.4683			602.2	0.483639	0.456739	0.465232	0.427452	0.43215	0.430146	1.10396	1.17221	1.20229	0.3619	0.423285	0.46729			204.4	0.0865	0.0595	0.046	0.1453	0.1258	0.1044	0.1479	0.1329	0.1477	0.1315	0.1314	0.1424			204.4	0.0439	-0.0007	0.0651	0.0744
602.4	0.576189	0.533788	0.566824	0.443257	0.445373	0.441039	1.52933	1.61442	1.82248	0.43063	0.497288	0.46711			602.4	0.481944	0.455122	0.463696	0.426132	0.430814	0.428769	1.09921	1.16619	1.19686	0.361154	0.422116	0.466109			204.8	0.0871	0.0604	0.046	0.1459	0.1264	0.1041	0.1479	0.1331	0.1473	0.133	0.1327	0.1432			204.8	0.0432	-0.0007	0.0656	0.0752
602.6	0.572218	0.53021	0.562839	0.440211	0.442465	0.438231	1.51326	1.59894	1.80451	0.428208	0.493453	0.463913			602.6	0.478589	0.452159	0.460774	0.423217	0.427973	0.42599	1.08861	1.15579	1.18546	0.359312	0.419394	0.463138			205.2	0.0887	0.0604	0.0467	0.1477	0.1248	0.1041	0.1484	0.1336	0.148	0.1331	0.1335	0.1423			205.2	0.0439	-0.001	0.0661	0.0752
602.8	0.569105	0.527224	0.559507	0.437796	0.440048	0.435938	1.50103	1.5859	1.7893	0.426107	0.490368	0.461518			602.8	0.475952	0.449712	0.458169	0.420962	0.425602	0.42364	1.07995	1.14642	1.17577	0.357726	0.417135	0.460388			205.6	0.087	0.062	0.0463	0.1457	0.1268	0.1043	0.1471	0.1332	0.1475	0.1314	0.1327	0.1433			205.6	0.0427	0	0.0674	0.0749
603	0.566598	0.524843	0.556966	0.435858	0.43818	0.434092	1.49155	1.57587	1.77654	0.424253	0.488195	0.460007			603	0.473789	0.447731	0.456188	0.419198	0.423641	0.421709	1.07305	1.13901	1.16832	0.356408	0.415129	0.458511			206	0.0864	0.0609	0.0463	0.1474	0.1252	0.1046	0.1491	0.134	0.1473	0.1312	0.1328	0.1412			206	0.0432	0.0001	0.0659	0.0757
603.2	0.563323	0.52182	0.553807	0.433426	0.435906	0.431687	1.47911	1.56282	1.76104	0.421737	0.485701	0.45786			603.2	0.470889	0.445116	0.453682	0.416879	0.421318	0.419477	1.06458	1.12985	1.15895	0.354936	0.412768	0.456198			206.4	0.0877	0.0598	0.0461	0.1482	0.1257	0.1044	0.149	0.1321	0.1467	0.132	0.1323	0.1424			206.4	0.0437	-0.0012	0.0656	0.0761
603.4	0.560663	0.519465	0.551268	0.431476	0.434143	0.429754	1.46903	1.55205	1.74854	0.41999	0.483883	0.456021			603.4	0.46868	0.443132	0.451544	0.415077	0.419483	0.41759	1.05749	1.12252	1.15137	0.353544	0.41131	0.454519			206.8	0.0882	0.0602	0.0468	0.1473	0.1263	0.1036	0.1487	0.1324	0.1462	0.1327	0.1314	0.142			206.8	0.0437	-0.0006	0.0651	0.0749
603.6	0.556521	0.515887	0.54755	0.428662	0.431342	0.426907	1.45373	1.53655	1.73049	0.417703	0.480897	0.453265			603.6	0.465481	0.439884	0.448284	0.41224	0.416922	0.414756	1.0467	1.11205	1.13954	0.351532	0.408694	0.452143			207.2	0.0872	0.0591	0.0466	0.147	0.125	0.1044	0.1481	0.1321	0.1474	0.1318	0.1315	0.1426			207.2	0.0439	-0.0022	0.0652	0.075
603.8	0.553227	0.512891	0.544276	0.426248	0.428998	0.424687	1.4415	1.52399	1.71591	0.415124	0.478084	0.450815			603.8	0.462773	0.437391	0.445646	0.410079	0.414612	0.412412	1.03833	1.10372	1.13014	0.349542	0.406315	0.44944			207.6	0.088	0.0607	0.0457	0.1465	0.1253	0.104	0.1485	0.1343	0.1474	0.1317	0.1329	0.142			207.6	0.0435	-0.0018	0.066	0.0746
604	0.550681	0.510455	0.541655	0.424335	0.42719	0.422824	1.43179	1.51386	1.70492	0.413278	0.475952	0.449338			604	0.460577	0.435391	0.443618	0.408343	0.41279	0.410618	1.03161	1.09694	1.12298	0.348151	0.404271	0.447564			208	0.0877	0.0614	0.0469	0.1477	0.1251	0.1051	0.1479	0.1338	0.1473	0.1316	0.132	0.142			208	0.042	-0.0001	0.0673	0.0756
604.2	0.547491	0.507532	0.53828	0.422213	0.424967	0.420601	1.41939	1.50073	1.68989	0.411116	0.473189	0.446799			604.2	0.457811	0.432991	0.44106	0.406123	0.410519	0.408456	1.02296	1.08859	1.11339	0.346668	0.401722	0.444852			208.4	0.0888	0.0604	0.0477	0.1474	0.126	0.1056	0.1493	0.1334	0.1481	0.1326	0.133	0.1432			208.4	0.0447	-0.0005	0.0666	0.0766
604.4	0.544885	0.505163	0.535663	0.420411	0.423065	0.418788	1.40977	1.49023	1.67747	0.409322	0.471212	0.444899			604.4	0.455592	0.431041	0.439079	0.404262	0.408772	0.406667	1.01642	1.08147	1.1055	0.345562	0.400102	0.442674			208.8	0.0852	0.0605	0.0467	0.145	0.1275	0.1048	0.146	0.1343	0.1464	0.1304	0.1328	0.1417			208.8	0.0408	0.0006	0.0652	0.0737
604.6	0.540815	0.501628	0.532154	0.41765	0.420281	0.415976	1.3947	1.47476	1.66016	0.406937	0.467979	0.442202			604.6	0.452354	0.428011	0.436037	0.401819	0.406122	0.404015	1.00578	1.07057	1.0945	0.343693	0.397998	0.439917			209.2	0.0876	0.059	0.0471	0.1466	0.1252	0.1036	0.1491	0.1335	0.1471	0.132	0.1324	0.1424			209.2	0.0434	-0.0017	0.0649	0.0753
604.8	0.538848	0.499957	0.530186	0.416174	0.418946	0.41464	1.38712	1.46733	1.65092	0.406049	0.466301	0.440887			604.8	0.450659	0.426537	0.434657	0.400505	0.404963	0.402717	1.0006	1.06484	1.08929	0.34288	0.396533	0.438674			209.6	0.0888	0.0618	0.0463	0.147	0.1268	0.1041	0.1493	0.1345	0.1467	0.1322	0.1329	0.1416			209.6	0.0444	-0.0005	0.0661	0.0757
605	0.535059	0.496497	0.526472	0.413184	0.416272	0.411765	1.37223	1.45187	1.63328	0.402926	0.462998	0.438211			605	0.447567	0.423775	0.431782	0.397852	0.402297	0.400145	0.990811	1.05376	1.07806	0.340727	0.393653	0.435377			210	0.0884	0.0602	0.0474	0.1469	0.124	0.1048	0.1481	0.1335	0.1477	0.1321	0.1324	0.1421			210	0.0446	-0.0014	0.0664	0.076
605.2	0.531888	0.493646	0.523338	0.410885	0.413918	0.40962	1.36028	1.43878	1.61855	0.400812	0.460389	0.435858			605.2	0.44507	0.421265	0.429146	0.395549	0.400111	0.397832	0.98214	1.04482	1.06828	0.338998	0.391263	0.433202			210.4	0.088	0.0612	0.0462	0.1475	0.1258	0.105	0.1489	0.1333	0.1467	0.132	0.1318	0.1419			210.4	0.0434	-0.0001	0.0661	0.0763
605.4	0.529414	0.491216	0.520903	0.409025	0.412113	0.407746	1.35077	1.42842	1.60648	0.399117	0.458297	0.433865			605.4	0.442965	0.419333	0.427246	0.393636	0.398405	0.39594	0.975	1.03761	1.06036	0.337397	0.389399	0.431378			210.8	0.0875	0.0606	0.0464	0.1473	0.1251	0.1045	0.1472	0.1325	0.1469	0.1324	0.1313	0.1423			210.8	0.0439	-0.0013	0.0665	0.0763
605.6	0.525448	0.487542	0.517038	0.406236	0.409392	0.404882	1.33603	1.41286	1.58838	0.396393	0.454931	0.430946			605.6	0.439773	0.41648	0.42435	0.390927	0.395453	0.393408	0.964481	1.0269	1.04943	0.335256	0.386805	0.428152			211.2	0.0878	0.0609	0.0464	0.1474	0.1267	0.1044	0.1467	0.1342	0.1465	0.1314	0.1324	0.1418			211.2	0.0431	-0.0004	0.0653	0.075
605.8	0.523522	0.485838	0.515132	0.404846	0.408155	0.403444	1.32903	1.40532	1.57937	0.395039	0.453292	0.429798			605.8	0.438172	0.415094	0.422775	0.38963	0.394171	0.392085	0.959576	1.02162	1.04396	0.334142	0.385384	0.426818			211.6	0.0886	0.061	0.0459	0.1471	0.1264	0.1037	0.149	0.132	0.1456	0.1326	0.1322	0.1419			211.6	0.0443	-0.0008	0.0659	0.0768
606	0.519607	0.482581	0.511358	0.402326	0.405428	0.400765	1.31488	1.38979	1.56227	0.392371	0.450373	0.42732			606	0.434994	0.412271	0.419572	0.38687	0.391355	0.389542	0.949847	1.01125	1.03349	0.331995	0.382576	0.423526			212	0.0879	0.0615	0.0467	0.1473	0.1256	0.1058	0.1479	0.1341	0.1482	0.1321	0.1323	0.143			212	0.044	-0.0007	0.0669	0.0751
606.2	0.516497	0.479861	0.508313	0.400078	0.4032	0.3985	1.30287	1.37669	1.54807	0.390421	0.447681	0.424361			606.2	0.432543	0.409876	0.416974	0.384811	0.389037	0.387413	0.941906	1.00301	1.02458	0.330367	0.380884	0.420862			212.4	0.0897	0.0613	0.0463	0.1476	0.126	0.1048	0.1494	0.1331	0.146	0.1332	0.1325	0.1416			212.4	0.0443	-0.0004	0.0665	0.0768
606.4	0.514006	0.477573	0.505884	0.398188	0.401492	0.396732	1.29334	1.36643	1.53688	0.388899	0.445494	0.422099			606.4	0.430557	0.408058	0.414972	0.383124	0.387172	0.385747	0.935389	0.995913	1.0177	0.329016	0.379366	0.41843			212.8	0.088	0.0621	0.0475	0.1487	0.1278	0.106	0.1484	0.1332	0.1475	0.1318	0.1326	0.1423			212.8	0.0441	0.0011	0.0669	0.0765
606.6	0.510316	0.473974	0.502172	0.395512	0.398741	0.394202	1.27948	1.35203	1.52021	0.386242	0.442469	0.418637			606.6	0.427369	0.405248	0.412004	0.380629	0.38463	0.383182	0.925746	0.985794	1.00713	0.326925	0.376624	0.415055			213.2	0.0879	0.0614	0.0473	0.1468	0.1264	0.1063	0.1476	0.1332	0.1481	0.1308	0.1326	0.1422			213.2	0.0428	0	0.0667	0.0761
606.8	0.508517	0.472477	0.50034	0.394278	0.397445	0.392892	1.27219	1.34455	1.51145	0.384867	0.440872	0.416848			606.8	0.425782	0.403847	0.41054	0.379476	0.383165	0.381837	0.921268	0.980527	1.00161	0.325791	0.375174	0.413404			213.6	0.0878	0.0606	0.0476	0.1477	0.125	0.1045	0.1473	0.1319	0.1466	0.131	0.1306	0.1423			213.6	0.0439	-0.0011	0.0663	0.0756
607	0.504982	0.469116	0.496484	0.391812	0.39458	0.390317	1.25824	1.33015	1.49433	0.382611	0.437923	0.414664			607	0.422794	0.401176	0.407709	0.376742	0.380304	0.379469	0.911805	0.969766	0.990836	0.323787	0.372381	0.410723			214	0.0878	0.0621	0.0472	0.1464	0.1262	0.1056	0.1478	0.1341	0.1468	0.1302	0.1336	0.1429			214	0.0435	0.0001	0.0668	0.0756
607.2	0.501805	0.466417	0.493559	0.389635	0.392288	0.387992	1.24651	1.31776	1.47992	0.380236	0.435664	0.411855			607.2	0.42033	0.398747	0.4052	0.374549	0.378035	0.377398	0.903503	0.960826	0.981324	0.322228	0.370388	0.408113			214.4	0.0882	0.0613	0.0468	0.147	0.1254	0.104	0.1472	0.1335	0.1471	0.1322	0.1326	0.1422			214.4	0.0442	-0.0001	0.0658	0.0762
607.4	0.49928	0.464238	0.491231	0.387929	0.390459	0.386134	1.23709	1.30778	1.46853	0.378434	0.433786	0.409815			607.4	0.418352	0.396885	0.403232	0.372752	0.376183	0.375614	0.896955	0.953504	0.974059	0.320937	0.368956	0.406217			214.8	0.0881	0.0617	0.048	0.1471	0.1262	0.106	0.1475	0.1329	0.1494	0.1312	0.1324	0.1435			214.8	0.0436	-0.0007	0.068	0.076
607.6	0.496271	0.461358	0.488307	0.385639	0.388259	0.383801	1.22562	1.29603	1.45469	0.376111	0.431256	0.407545			607.6	0.415869	0.394431	0.40082	0.370658	0.374084	0.373344	0.889132	0.945167	0.965393	0.319259	0.366763	0.403565			215.2	0.0879	0.0619	0.0473	0.1469	0.1257	0.1051	0.1476	0.1328	0.147	0.1312	0.1322	0.1429			215.2	0.0442	0.0002	0.0673	0.0761
607.8	0.493929	0.459082	0.485968	0.383805	0.38646	0.382065	1.21631	1.28665	1.44348	0.374358	0.42917	0.405689			607.8	0.413872	0.392604	0.399107	0.368967	0.372354	0.371548	0.882799	0.938149	0.958166	0.317819	0.364908	0.401311			215.6	0.0884	0.0621	0.0475	0.1471	0.1267	0.1058	0.147	0.1339	0.1471	0.1308	0.133	0.1424			215.6	0.0444	0.0008	0.0672	0.0761
608	0.490297	0.455696	0.482405	0.381242	0.383949	0.37973	1.20288	1.27161	1.42723	0.371454	0.426276	0.402838			608	0.410872	0.389752	0.396124	0.366376	0.369778	0.368883	0.873665	0.927958	0.94695	0.315974	0.362509	0.398548			216	0.0883	0.0616	0.0484	0.1474	0.1245	0.1071	0.148	0.1336	0.1484	0.1311	0.1314	0.1433			216	0.0439	-0.0009	0.0678	0.0763
608.2	0.488576	0.454116	0.480537	0.379929	0.382722	0.378473	1.19614	1.26475	1.41913	0.370207	0.424443	0.401237			608.2	0.40947	0.388409	0.394585	0.365172	0.36846	0.367614	0.86887	0.922937	0.941798	0.315043	0.361184	0.396844			216.4	0.0889	0.0623	0.0481	0.1466	0.1268	0.1058	0.1484	0.1337	0.1477	0.1318	0.1327	0.1422			216.4	0.0441	-0.0003	0.0677	0.0761
608.4	0.48513	0.450909	0.476944	0.377331	0.380017	0.375784	1.18309	1.24982	1.40245	0.367839	0.421642	0.398142			608.4	0.406539	0.385391	0.391795	0.362525	0.365848	0.365159	0.859671	0.912778	0.931529	0.313047	0.358892	0.393838			216.8	0.0894	0.0627	0.0472	0.1484	0.1262	0.1053	0.1473	0.1336	0.1474	0.1322	0.1324	0.1421			216.8	0.0442	-0.0001	0.0675	0.0773
608.6	0.482223	0.448303	0.473972	0.375304	0.377698	0.373637	1.17185	1.23792	1.38872	0.36597	0.419178	0.395738			608.6	0.40426	0.38299	0.389417	0.360507	0.363691	0.363099	0.852539	0.904979	0.922901	0.311711	0.356724	0.391159			217.2	0.0885	0.0617	0.0464	0.1466	0.1256	0.106	0.1473	0.1349	0.1467	0.1305	0.1314	0.1414			217.2	0.044	-0.0002	0.0665	0.0761
608.8	0.479933	0.446213	0.47167	0.373568	0.376059	0.372037	1.163	1.2284	1.37834	0.36418	0.417279	0.393764			608.8	0.402446	0.381084	0.387505	0.358755	0.362006	0.361414	0.846772	0.898799	0.915986	0.310522	0.354848	0.389245			217.6	0.0897	0.0619	0.0477	0.148	0.1269	0.106	0.1498	0.1337	0.1481	0.1318	0.1313	0.1421			217.6	0.0446	-0.0002	0.0669	0.0777
609	0.476197	0.442927	0.468391	0.370877	0.373418	0.369491	1.15061	1.21463	1.36307	0.361304	0.414298	0.390944			609	0.399574	0.378331	0.38459	0.356379	0.359683	0.358876	0.837507	0.888854	0.905873	0.308236	0.352578	0.386604			218	0.0881	0.0612	0.0478	0.1465	0.1256	0.1072	0.1491	0.1331	0.1477	0.1306	0.1331	0.1425			218	0.0445	-0.0003	0.0673	0.076
609.2	0.474406	0.441204	0.466666	0.369531	0.372045	0.368245	1.14402	1.20806	1.35516	0.3601	0.412767	0.389377			609.2	0.398179	0.376866	0.383191	0.35511	0.358434	0.357617	0.832961	0.883727	0.901012	0.30752	0.351293	0.385128			218.4	0.0898	0.0624	0.048	0.147	0.1263	0.1068	0.1474	0.134	0.1472	0.131	0.132	0.1423			218.4	0.0441	-0.0001	0.0679	0.0775
609.4	0.470952	0.437732	0.463186	0.366889	0.369483	0.365759	1.131	1.19414	1.33914	0.357574	0.410099	0.386581			609.4	0.395277	0.374093	0.380611	0.352472	0.356166	0.355178	0.823445	0.873725	0.89115	0.305841	0.348883	0.38201			218.8	0.0887	0.0618	0.0469	0.1469	0.1268	0.1061	0.1468	0.1341	0.1462	0.1314	0.1328	0.1414			218.8	0.0442	0.0006	0.0664	0.0758
609.6	0.468076	0.435038	0.460312	0.364892	0.367152	0.363512	1.12023	1.18275	1.32596	0.355449	0.407596	0.38402			609.6	0.392859	0.371681	0.378288	0.350372	0.35417	0.353169	0.815713	0.865365	0.882553	0.30419	0.34673	0.379469			219.2	0.0892	0.0627	0.0483	0.1473	0.1272	0.1064	0.148	0.134	0.1472	0.1311	0.1313	0.1431			219.2	0.0442	0.0015	0.0675	0.0766
609.8	0.465727	0.433004	0.458008	0.363324	0.365398	0.361699	1.11178	1.17356	1.31522	0.353848	0.405464	0.382209			609.8	0.39094	0.369718	0.376542	0.348553	0.35251	0.351549	0.809708	0.858702	0.875569	0.303089	0.344948	0.377767			219.6	0.089	0.0627	0.0482	0.147	0.126	0.1067	0.1475	0.133	0.1475	0.1304	0.1327	0.1423			219.6	0.0443	0.0005	0.0688	0.0768
610	0.462159	0.429633	0.454716	0.360536	0.36293	0.359011	1.09914	1.16019	1.29952	0.351066	0.402718	0.380171			610	0.388137	0.367023	0.373805	0.346149	0.350251	0.349101	0.80132	0.849083	0.865625	0.300787	0.342836	0.375007			220	0.0893	0.0627	0.0478	0.1471	0.1271	0.1058	0.1483	0.1342	0.1475	0.1312	0.1325	0.143			220	0.0437	0.0005	0.0677	0.0764
610.2	0.460423	0.427935	0.452963	0.359277	0.361832	0.357694	1.09273	1.15325	1.29179	0.349739	0.40147	0.378612			610.2	0.386632	0.365675	0.372442	0.344992	0.349061	0.347899	0.796917	0.844357	0.861015	0.299839	0.341816	0.3736			220.4	0.0889	0.0629	0.0481	0.1469	0.1262	0.106	0.1476	0.1341	0.1467	0.1311	0.1329	0.1415			220.4	0.0435	-0.0001	0.0676	0.0754
610.4	0.457323	0.424701	0.449743	0.356685	0.359281	0.355277	1.08066	1.14008	1.27677	0.347568	0.398694	0.376134			610.4	0.383782	0.362977	0.369756	0.342588	0.346878	0.345264	0.788069	0.835581	0.851802	0.298131	0.339674	0.370885			220.8	0.0897	0.0621	0.0482	0.1483	0.1264	0.1075	0.1485	0.1338	0.1472	0.1325	0.1312	0.1418			220.8	0.0441	0.0002	0.0673	0.0777
610.6	0.454542	0.421985	0.446881	0.354508	0.357181	0.353304	1.07031	1.12909	1.26425	0.345788	0.395966	0.374105			610.6	0.381527	0.360787	0.367557	0.340623	0.344892	0.343267	0.781054	0.828332	0.843783	0.296448	0.337478	0.368767			221.2	0.0889	0.0624	0.0482	0.1471	0.1267	0.106	0.1471	0.1336	0.1464	0.1318	0.1325	0.1423			221.2	0.0436	0.0003	0.0675	0.0758
610.8	0.452194	0.419787	0.444564	0.352765	0.35551	0.35172	1.06203	1.12024	1.25425	0.344415	0.39394	0.372487			610.8	0.379689	0.359032	0.365859	0.339025	0.343383	0.341705	0.775307	0.822213	0.837418	0.294877	0.33558	0.366906			221.6	0.0908	0.0615	0.0482	0.1484	0.1264	0.1071	0.1493	0.1318	0.1474	0.1331	0.132	0.1433			221.6	0.0452	0.0001	0.0682	0.0787
611	0.448862	0.41672	0.440957	0.350424	0.353108	0.349261	1.04952	1.10705	1.23953	0.342064	0.39085	0.370203			611	0.376905	0.356101	0.363094	0.336707	0.340837	0.33925	0.76669	0.813173	0.828145	0.292987	0.333004	0.364726			222	0.0896	0.0625	0.0474	0.1478	0.1261	0.106	0.1477	0.1329	0.1471	0.1308	0.1318	0.1416			222	0.0443	-0.0002	0.0679	0.0764
611.2	0.447185	0.415213	0.439317	0.349209	0.351825	0.347812	1.04334	1.10048	1.23175	0.341097	0.389278	0.369123			611.2	0.375366	0.354868	0.36181	0.335531	0.339613	0.337998	0.762575	0.808301	0.823388	0.292074	0.33184	0.363543			222.4	0.0905	0.0622	0.0482	0.1478	0.1268	0.1065	0.148	0.1333	0.1476	0.1314	0.1326	0.1425			222.4	0.0445	0.0009	0.0678	0.0769
611.4	0.443784	0.412008	0.435947	0.346839	0.349325	0.345089	1.03163	1.08814	1.2169	0.338825	0.386566	0.366535			611.4	0.372575	0.352337	0.359156	0.333152	0.337324	0.335661	0.754175	0.800145	0.81379	0.289726	0.329679	0.360713			222.8	0.0894	0.0636	0.0476	0.1476	0.1268	0.107	0.1462	0.135	0.1467	0.1306	0.133	0.1417			222.8	0.0431	0.0011	0.0677	0.0761
611.6	0.440948	0.409456	0.433161	0.344709	0.347301	0.343213	1.02141	1.07794	1.20528	0.336813	0.384255	0.364641			611.6	0.370291	0.35025	0.356981	0.331148	0.335259	0.33365	0.746926	0.792819	0.806207	0.287982	0.327591	0.35848			223.2	0.0901	0.0623	0.0491	0.1482	0.1265	0.1083	0.148	0.1331	0.1477	0.1311	0.1313	0.1421			223.2	0.0448	0.0006	0.068	0.0776
611.8	0.438589	0.407363	0.430896	0.343041	0.345718	0.341698	1.01338	1.06998	1.19589	0.335202	0.382487	0.363095			611.8	0.368419	0.34861	0.355232	0.329666	0.333757	0.332047	0.740946	0.786843	0.800103	0.286662	0.326287	0.356694			223.6	0.0901	0.0628	0.0484	0.1479	0.1261	0.1082	0.1475	0.1321	0.1464	0.1313	0.1318	0.1434			223.6	0.0437	0.0002	0.0693	0.0769
612	0.435304	0.404175	0.427688	0.340604	0.343111	0.339196	1.00158	1.05814	1.18149	0.332979	0.379989	0.360089			612	0.365606	0.346123	0.352537	0.327408	0.331483	0.329785	0.732599	0.77784	0.791351	0.28465	0.324053	0.353734			224	0.09	0.0627	0.0482	0.1467	0.1271	0.1072	0.1481	0.1328	0.147	0.1313	0.1313	0.1417			224	0.044	0.0007	0.0677	0.0775
612.2	0.433614	0.402748	0.426122	0.339484	0.341895	0.338007	0.99548	1.0516	1.17439	0.331743	0.378969	0.358992			612.2	0.364217	0.344815	0.351326	0.326205	0.330284	0.328683	0.728495	0.773522	0.786876	0.283845	0.322619	0.352305			224.4	0.0903	0.0625	0.0474	0.1473	0.1263	0.1064	0.1476	0.1335	0.1474	0.1306	0.1326	0.142			224.4	0.0444	-0.0002	0.0679	0.0767
612.4	0.43044	0.399608	0.422841	0.337077	0.339441	0.335568	0.984184	1.03933	1.16054	0.329787	0.376651	0.356266			612.4	0.361595	0.342434	0.348871	0.323885	0.32787	0.326272	0.720815	0.765318	0.77786	0.282051	0.320349	0.349535			224.8	0.0899	0.0627	0.0483	0.1477	0.1273	0.1069	0.1477	0.1332	0.146	0.1317	0.1321	0.1418			224.8	0.0446	0.0012	0.0675	0.0769
612.6	0.427755	0.397267	0.420166	0.335113	0.337505	0.333552	0.974608	1.02965	1.14929	0.327947	0.374183	0.354192			612.6	0.359362	0.340318	0.346639	0.322018	0.325935	0.324234	0.714421	0.758401	0.770493	0.280406	0.318214	0.347344			225.2	0.0901	0.0627	0.0491	0.1476	0.1268	0.1081	0.1482	0.1331	0.1482	0.1315	0.1325	0.1424			225.2	0.0446	0.001	0.0684	0.077
612.8	0.425574	0.395228	0.418078	0.333551	0.335934	0.332037	0.967009	1.02209	1.14007	0.326833	0.372698	0.352551			612.8	0.357596	0.338634	0.344937	0.320533	0.324369	0.322535	0.709458	0.753156	0.764772	0.279336	0.316848	0.345775			225.6	0.0909	0.0625	0.0494	0.1481	0.1264	0.1088	0.1483	0.1328	0.1466	0.1313	0.1309	0.1434			225.6	0.0453	0.0001	0.0685	0.0774
613	0.422226	0.392182	0.414972	0.331083	0.333525	0.329761	0.956185	1.0106	1.12678	0.324407	0.370039	0.35024			613	0.355105	0.336162	0.342316	0.318287	0.322169	0.320113	0.702002	0.745349	0.756146	0.277373	0.314483	0.343356			226	0.0907	0.063	0.0485	0.1486	0.1262	0.1082	0.148	0.1337	0.1467	0.1315	0.1322	0.142			226	0.0458	0.0008	0.0682	0.0788
613.2	0.420658	0.390789	0.413305	0.329895	0.332328	0.328594	0.950499	1.0044	1.12009	0.323356	0.36866	0.348856			613.2	0.353715	0.334909	0.341112	0.317127	0.320963	0.31885	0.697507	0.740955	0.751606	0.276719	0.313299	0.341984			226.4	0.0901	0.0619	0.0492	0.1489	0.1266	0.1067	0.149	0.1321	0.1455	0.1318	0.1323	0.1423			226.4	0.046	-0.0006	0.0673	0.0782
613.4	0.417443	0.387896	0.409969	0.327403	0.329682	0.326351	0.93934	0.992624	1.1073	0.321194	0.365554	0.346683			613.4	0.351181	0.332372	0.338751	0.314789	0.318506	0.316542	0.689454	0.732514	0.743524	0.275066	0.310708	0.340019			226.8	0.0899	0.0637	0.0483	0.1485	0.127	0.1082	0.1472	0.1337	0.1473	0.1316	0.133	0.1433			226.8	0.0452	0.0015	0.069	0.0775
613.6	0.415764	0.386461	0.408409	0.326228	0.328593	0.325121	0.933707	0.986627	1.10079	0.319866	0.364037	0.345501			613.6	0.349938	0.331216	0.337476	0.313686	0.317248	0.315326	0.685427	0.728335	0.739493	0.274243	0.3095	0.338492			227.2	0.0907	0.0632	0.0493	0.1481	0.1264	0.1076	0.1488	0.1321	0.1469	0.1311	0.132	0.1427			227.2	0.0443	0	0.0692	0.0781
613.8	0.412587	0.383551	0.405401	0.323875	0.32626	0.322942	0.922588	0.975351	1.08777	0.317549	0.361602	0.342883			613.8	0.347343	0.328833	0.334982	0.311318	0.314952	0.313051	0.678007	0.720095	0.731402	0.272529	0.30711	0.335711			227.6	0.0905	0.0635	0.0491	0.1481	0.1273	0.1079	0.1471	0.1334	0.1473	0.1316	0.1321	0.1422			227.6	0.0451	0.001	0.0691	0.0767
614	0.410569	0.381757	0.403424	0.322363	0.324768	0.321386	0.915719	0.968175	1.07907	0.315755	0.359684	0.340939			614	0.345566	0.327236	0.333271	0.309689	0.313376	0.311541	0.673284	0.715143	0.725729	0.271585	0.305374	0.33393			228	0.0911	0.0652	0.0487	0.1484	0.1275	0.1077	0.1485	0.1339	0.1466	0.1315	0.1332	0.1423			228	0.0462	0.0013	0.0698	0.0783
614.2	0.407999	0.379551	0.401032	0.320616	0.322807	0.319454	0.907104	0.959365	1.0681	0.313297	0.357349	0.338581			614.2	0.343438	0.325365	0.331203	0.307795	0.311527	0.309621	0.66741	0.70906	0.719005	0.270194	0.303588	0.331683			228.4	0.0916	0.0633	0.0485	0.1484	0.126	0.1084	0.1489	0.1341	0.1468	0.1329	0.1318	0.1418			228.4	0.045	0.0005	0.0685	0.0783
614.4	0.404678	0.376659	0.398012	0.3182	0.320394	0.317241	0.896794	0.948186	1.05579	0.310917	0.354863	0.335828			614.4	0.340867	0.323074	0.328607	0.305622	0.309314	0.307504	0.659943	0.701745	0.71152	0.268545	0.301369	0.328845			228.8	0.0905	0.0628	0.0503	0.1481	0.1265	0.1079	0.148	0.1317	0.1465	0.1311	0.1317	0.1428			228.8	0.0447	-0.0004	0.069	0.0783
614.6	0.403224	0.37529	0.396657	0.316997	0.319321	0.316051	0.891428	0.942334	1.04927	0.309714	0.353576	0.334686			614.6	0.339566	0.321778	0.327449	0.304552	0.308184	0.306463	0.656023	0.697695	0.707437	0.267668	0.300125	0.327642			229.2	0.0909	0.0641	0.0498	0.1486	0.1273	0.108	0.1469	0.134	0.1476	0.1316	0.1327	0.1425			229.2	0.0447	0.0011	0.069	0.0771
614.8	0.400132	0.372282	0.393798	0.314798	0.317035	0.313609	0.881267	0.931398	1.03661	0.307332	0.350705	0.332068			614.8	0.337016	0.319177	0.324997	0.302339	0.305902	0.304126	0.648658	0.689896	0.69991	0.265959	0.298088	0.325176			229.6	0.0908	0.0638	0.0476	0.147	0.1268	0.1064	0.1484	0.1331	0.1461	0.1315	0.1322	0.1406			229.6	0.0446	0.0015	0.0679	0.0777
615	0.398056	0.370445	0.391875	0.313282	0.315512	0.312081	0.874624	0.924234	1.02836	0.305682	0.348942	0.330363			615	0.335302	0.317609	0.323327	0.300798	0.304389	0.302738	0.644261	0.685086	0.694745	0.264841	0.296609	0.323437			230	0.0916	0.0639	0.049	0.15	0.1274	0.1078	0.1477	0.132	0.1476	0.1327	0.1318	0.1423			230	0.0451	0.0006	0.0693	0.0787
615.2	0.395403	0.36821	0.389369	0.311375	0.313692	0.310151	0.866384	0.915042	1.01846	0.303461	0.346453	0.328469			615.2	0.333141	0.315553	0.321394	0.298982	0.302515	0.300814	0.638584	0.678981	0.688614	0.263411	0.294516	0.321562			230.4	0.0914	0.0637	0.0494	0.1478	0.1267	0.1075	0.1482	0.1327	0.1474	0.131	0.1325	0.1423			230.4	0.0461	0.0006	0.07	0.0783
615.4	0.392323	0.365228	0.386384	0.308974	0.311492	0.307834	0.856897	0.904693	1.00675	0.301695	0.343504	0.326148			615.4	0.330619	0.313302	0.318913	0.296886	0.300293	0.29859	0.631524	0.671306	0.681021	0.261805	0.292204	0.319174			230.8	0.0905	0.063	0.0494	0.1474	0.1259	0.1081	0.1479	0.1327	0.147	0.1311	0.1313	0.143			230.8	0.0443	0.0001	0.0683	0.0774
615.6	0.390743	0.363985	0.384972	0.307826	0.310342	0.306838	0.851858	0.899578	1.0007	0.300675	0.342204	0.324891			615.6	0.329379	0.312152	0.317741	0.295727	0.299307	0.297491	0.628057	0.667332	0.677219	0.26072	0.291041	0.317933			231.2	0.0917	0.064	0.0503	0.1483	0.1262	0.109	0.1489	0.134	0.1469	0.1316	0.1326	0.1418			231.2	0.0458	0.0011	0.0691	0.0778
615.8	0.387638	0.361125	0.382048	0.305475	0.307947	0.304571	0.842161	0.8894	0.988949	0.298441	0.33974	0.322752			615.8	0.326815	0.309775	0.315489	0.293534	0.297183	0.295272	0.621127	0.660464	0.669524	0.258961	0.28921	0.315598			231.6	0.0916	0.065	0.0496	0.1481	0.1277	0.1081	0.1485	0.1344	0.1462	0.1323	0.1327	0.1415			231.6	0.0465	0.0016	0.0693	0.0789
616	0.385792	0.359387	0.380119	0.303904	0.306585	0.303057	0.835858	0.882487	0.981416	0.29668	0.337963	0.321187			616	0.325215	0.3083	0.31386	0.292112	0.295667	0.293864	0.6167	0.655612	0.664614	0.257705	0.287786	0.313962			232	0.0914	0.0643	0.0491	0.1485	0.1281	0.1088	0.1466	0.1328	0.1472	0.1323	0.1322	0.1422			232	0.0452	0.0011	0.0699	0.0788
616.2	0.383411	0.357153	0.3777	0.301908	0.304909	0.301185	0.827638	0.873868	0.971827	0.294813	0.336011	0.319333			616.2	0.323131	0.306389	0.31178	0.290299	0.293716	0.292107	0.610818	0.649436	0.658468	0.255973	0.286181	0.311931			232.4	0.0921	0.0643	0.0495	0.1489	0.1271	0.1082	0.1478	0.1338	0.1465	0.1321	0.1324	0.142			232.4	0.0454	0.0009	0.0692	0.0781
616.4	0.380417	0.354457	0.374766	0.299798	0.302636	0.29905	0.81861	0.863681	0.960353	0.292536	0.333833	0.316978			616.4	0.320662	0.304025	0.309349	0.288195	0.291702	0.289958	0.605002	0.642493	0.651305	0.254162	0.283883	0.309591			232.8	0.0913	0.0632	0.0493	0.1476	0.1271	0.1068	0.1473	0.1327	0.1463	0.1305	0.1312	0.1424			232.8	0.0453	-0.0004	0.0687	0.0777
616.6	0.378968	0.35313	0.3734	0.298718	0.301703	0.297867	0.814001	0.859044	0.954636	0.291399	0.332914	0.31586			616.6	0.3195	0.302923	0.308157	0.287075	0.290694	0.288896	0.601547	0.639059	0.64803	0.253221	0.282949	0.308465			233.2	0.0914	0.0644	0.0502	0.1476	0.1263	0.1092	0.1462	0.1332	0.147	0.1313	0.1324	0.1412			233.2	0.045	0.0001	0.0702	0.0775
616.8	0.375991	0.350488	0.370481	0.296561	0.299381	0.295549	0.805257	0.849545	0.943508	0.289414	0.330585	0.313379			616.8	0.317101	0.300574	0.305816	0.284918	0.288704	0.286703	0.595253	0.632528	0.640729	0.251611	0.281025	0.306141			233.6	0.0903	0.0632	0.0496	0.1472	0.1268	0.1065	0.1481	0.1338	0.1459	0.1312	0.1309	0.1407			233.6	0.0447	-0.0001	0.0683	0.0779
617	0.374005	0.348643	0.36852	0.29514	0.297848	0.293972	0.799484	0.843164	0.93609	0.287889	0.328736	0.311875			617	0.31546	0.298992	0.304241	0.283597	0.287317	0.2852	0.590989	0.628024	0.635846	0.250408	0.279731	0.304603			234	0.0918	0.0651	0.0501	0.1475	0.1273	0.1086	0.1482	0.1336	0.147	0.1311	0.1323	0.143			234	0.0458	0.0017	0.0701	0.0782
617.2	0.371452	0.346454	0.36617	0.293422	0.295915	0.292116	0.791827	0.835364	0.927159	0.28616	0.326547	0.309963			617.2	0.313531	0.296977	0.302352	0.281956	0.285559	0.283374	0.585626	0.622582	0.629972	0.249102	0.278343	0.302873			234.4	0.0919	0.0639	0.0494	0.1476	0.1268	0.1078	0.1479	0.1325	0.1466	0.1317	0.132	0.1418			234.4	0.0448	0.0008	0.069	0.0788
617.4	0.368564	0.343465	0.363387	0.29116	0.293872	0.290016	0.783027	0.825969	0.91703	0.284146	0.324507	0.307957			617.4	0.311153	0.294735	0.299961	0.279699	0.283461	0.28129	0.579267	0.615659	0.623241	0.247022	0.27596	0.300535			234.8	0.0925	0.0656	0.0497	0.1488	0.1266	0.1088	0.1477	0.1342	0.1466	0.1315	0.1325	0.1421			234.8	0.0458	0.0014	0.0705	0.0791
617.6	0.367237	0.342205	0.361963	0.290122	0.292687	0.288948	0.778937	0.821445	0.911735	0.283262	0.323395	0.306762			617.6	0.310082	0.293549	0.298835	0.278602	0.282391	0.280255	0.576266	0.612484	0.619718	0.246113	0.275098	0.299372			235.2	0.0913	0.0631	0.0494	0.1478	0.1265	0.1095	0.1463	0.1333	0.1477	0.1304	0.1317	0.142			235.2	0.0448	0.0001	0.0689	0.0771
617.8	0.364428	0.339561	0.359072	0.287993	0.29054	0.286966	0.770664	0.812554	0.901494	0.281207	0.321139	0.304171			617.8	0.307693	0.291298	0.296744	0.276498	0.280328	0.278066	0.570639	0.606005	0.612823	0.244671	0.272867	0.297198			235.6	0.0917	0.0641	0.0495	0.1479	0.1273	0.1087	0.1476	0.1339	0.147	0.1313	0.1329	0.1425			235.6	0.0464	0.0008	0.0695	0.0788
618	0.362342	0.33783	0.357153	0.286596	0.289096	0.285541	0.764971	0.806718	0.894857	0.279851	0.319693	0.302776			618	0.306192	0.289878	0.295164	0.275113	0.278971	0.276692	0.56676	0.6017	0.608522	0.243705	0.271819	0.295747			236	0.0923	0.0639	0.0494	0.1483	0.1267	0.1084	0.1484	0.1332	0.1455	0.1317	0.1316	0.1404			236	0.0456	0.0015	0.0684	0.0794
618.2	0.359832	0.335591	0.354789	0.284883	0.28739	0.283751	0.757768	0.799153	0.886616	0.278004	0.317736	0.300812			618.2	0.304255	0.287985	0.293225	0.273468	0.277252	0.274917	0.561889	0.596229	0.603289	0.242356	0.270178	0.293977			236.4	0.0927	0.0657	0.0505	0.1474	0.1284	0.109	0.1482	0.1343	0.1473	0.1309	0.1328	0.1423			236.4	0.0458	0.0018	0.0701	0.0786
618.4	0.35712	0.332941	0.351842	0.282612	0.285218	0.28166	0.749616	0.79088	0.875995	0.275781	0.315367	0.298747			618.4	0.301895	0.28581	0.290984	0.271299	0.275101	0.272868	0.555999	0.589882	0.596236	0.240454	0.268345	0.29173			236.8	0.0929	0.064	0.0497	0.1503	0.1264	0.1087	0.1489	0.1331	0.1466	0.1317	0.1327	0.1415			236.8	0.0456	0.0008	0.0692	0.0792
618.6	0.355673	0.331694	0.350294	0.281613	0.28412	0.280563	0.745381	0.786692	0.870782	0.274726	0.314182	0.297688			618.6	0.300731	0.284718	0.289913	0.270209	0.273966	0.271783	0.55307	0.587195	0.592846	0.2395	0.267224	0.290613			237.2	0.0915	0.0658	0.05	0.1479	0.1267	0.1088	0.1467	0.1337	0.1478	0.1301	0.1314	0.1429			237.2	0.0454	0.0011	0.0709	0.0777
618.8	0.35295	0.329014	0.347446	0.279542	0.282041	0.278547	0.737244	0.777746	0.860962	0.272405	0.31205	0.295481			618.8	0.298366	0.282556	0.287652	0.268231	0.271774	0.269646	0.547276	0.58131	0.586529	0.237856	0.265734	0.288303			237.6	0.0918	0.0647	0.0495	0.1479	0.1267	0.108	0.148	0.1325	0.1463	0.1319	0.1323	0.142			237.6	0.0454	0.0009	0.07	0.0778
619	0.351155	0.327264	0.345555	0.278168	0.280665	0.277152	0.731957	0.771857	0.854352	0.271113	0.310434	0.294216			619	0.296899	0.281028	0.286185	0.266939	0.270283	0.268319	0.543431	0.577053	0.582554	0.236744	0.26422	0.287091			238	0.0926	0.0647	0.0494	0.1491	0.1281	0.1082	0.1481	0.1333	0.1473	0.1316	0.1321	0.1417			238	0.0459	0.0013	0.0699	0.0782
619.2	0.348825	0.325109	0.343247	0.276463	0.279021	0.275271	0.725288	0.764939	0.846231	0.269489	0.308507	0.292689			619.2	0.294966	0.279115	0.284436	0.265222	0.268456	0.266635	0.538636	0.571866	0.5775	0.235422	0.262475	0.285664			238.4	0.093	0.064	0.0489	0.1492	0.1271	0.1092	0.1486	0.1337	0.1456	0.1311	0.1315	0.1415			238.4	0.0462	0.0017	0.0687	0.0792
619.4	0.345946	0.322514	0.340319	0.274443	0.276749	0.273221	0.717602	0.756858	0.836735	0.267427	0.305862	0.290228			619.4	0.292694	0.276987	0.28231	0.263229	0.266654	0.264586	0.533137	0.566231	0.570935	0.233827	0.260467	0.283406			238.8	0.0935	0.0661	0.0507	0.1487	0.1278	0.1093	0.1486	0.1331	0.1458	0.1317	0.1323	0.1414			238.8	0.0469	0.0018	0.0705	0.0801
619.6	0.344624	0.321236	0.339027	0.27347	0.275774	0.272187	0.713458	0.752908	0.831982	0.266442	0.304704	0.289149			619.6	0.291552	0.275898	0.281109	0.262229	0.265664	0.263573	0.530154	0.563609	0.568013	0.232969	0.259418	0.282325			239.2	0.093	0.065	0.0503	0.1497	0.127	0.1099	0.1488	0.1335	0.1463	0.1319	0.1324	0.1423			239.2	0.0462	0.0014	0.0698	0.0782
619.8	0.341994	0.3188	0.336299	0.27156	0.273719	0.270106	0.706055	0.744724	0.822748	0.264454	0.302245	0.28668			619.8	0.289214	0.273816	0.278865	0.260261	0.263561	0.261518	0.524499	0.557632	0.562214	0.2315	0.257722	0.280147			239.6	0.0929	0.0643	0.05	0.1483	0.1265	0.1096	0.1471	0.1335	0.1462	0.1308	0.1319	0.1419			239.6	0.0458	0.0011	0.0694	0.0789
620	0.340233	0.317088	0.334552	0.270279	0.272417	0.268881	0.700899	0.739422	0.816597	0.263152	0.3007	0.285148			620	0.28766	0.272456	0.277354	0.258944	0.262221	0.260264	0.520897	0.553808	0.558046	0.230252	0.256574	0.278531			240	0.0927	0.0651	0.0508	0.1484	0.127	0.11	0.1485	0.1345	0.1477	0.1313	0.1312	0.1427			240	0.0455	0.0016	0.0711	0.0786
620.2	0.338034	0.31513	0.332397	0.268564	0.270763	0.267265	0.694523	0.732787	0.808917	0.261612	0.298849	0.283454			620.2	0.285709	0.270609	0.27553	0.257303	0.260427	0.258753	0.516454	0.549087	0.553108	0.228724	0.254994	0.276686			240.4	0.0921	0.0643	0.0505	0.1484	0.1264	0.1087	0.1477	0.1327	0.1478	0.1312	0.1318	0.1419			240.4	0.0451	0.0013	0.0699	0.0791
620.4	0.335514	0.312614	0.329666	0.266597	0.268675	0.265239	0.687258	0.724663	0.800156	0.259476	0.296842	0.281376			620.4	0.283461	0.268589	0.273318	0.255264	0.25852	0.256884	0.511169	0.543168	0.547236	0.226795	0.253123	0.274222			240.8	0.0931	0.066	0.0519	0.1479	0.1275	0.1096	0.1477	0.1343	0.1471	0.1317	0.1334	0.1428			240.8	0.0447	0.0021	0.0712	0.0787
620.6	0.334164	0.311341	0.32841	0.265572	0.267674	0.264197	0.683617	0.720609	0.795589	0.258706	0.295822	0.280092			620.6	0.282272	0.267403	0.272324	0.254347	0.257574	0.255948	0.508738	0.540426	0.544345	0.226164	0.252575	0.273041			241.2	0.0932	0.0651	0.0505	0.1484	0.1271	0.1109	0.1485	0.1334	0.1468	0.1321	0.1329	0.1421			241.2	0.0463	0.0018	0.07	0.0801
620.8	0.331457	0.308904	0.325655	0.263568	0.265754	0.262203	0.676506	0.713189	0.78697	0.256766	0.293674	0.278016			620.8	0.280109	0.265369	0.270073	0.252534	0.255619	0.25396	0.503657	0.534877	0.53881	0.224452	0.250848	0.270987			241.6	0.093	0.0656	0.0498	0.1486	0.1269	0.1101	0.1471	0.1334	0.1467	0.1305	0.1315	0.1422			241.6	0.0464	0.0021	0.0711	0.078
621	0.329665	0.307254	0.323835	0.262192	0.264383	0.260895	0.671665	0.708331	0.781495	0.255624	0.292088	0.276856			621	0.27875	0.264051	0.268592	0.251238	0.254239	0.252654	0.500165	0.53137	0.535178	0.223353	0.249562	0.269454			242	0.093	0.0643	0.0507	0.149	0.126	0.1089	0.1473	0.1331	0.1457	0.1322	0.1328	0.1421			242	0.0467	0.0017	0.0691	0.0789
621.2	0.327637	0.305285	0.321674	0.260495	0.262733	0.259267	0.665813	0.702072	0.774416	0.253852	0.289979	0.275305			621.2	0.276879	0.262361	0.266792	0.249688	0.252577	0.251062	0.495965	0.52681	0.530656	0.221886	0.247849	0.267517			242.4	0.0927	0.0654	0.0507	0.1473	0.1277	0.1092	0.1471	0.1335	0.1482	0.1319	0.1325	0.1431			242.4	0.046	0.0024	0.0712	0.0781
621.4	0.32509	0.302896	0.319084	0.258434	0.260737	0.257357	0.659284	0.69485	0.766001	0.252001	0.28761	0.273125			621.4	0.274574	0.260271	0.2647	0.24782	0.250637	0.249084	0.490929	0.521588	0.525117	0.220159	0.245428	0.265142			242.8	0.092	0.0643	0.0514	0.1483	0.1271	0.1103	0.148	0.1326	0.147	0.1318	0.1322	0.1425			242.8	0.0455	0.0017	0.0703	0.0787
621.6	0.323031	0.301007	0.317011	0.256948	0.258987	0.25563	0.653447	0.688648	0.759481	0.250765	0.285794	0.271115			621.6	0.272816	0.258645	0.263034	0.246292	0.249072	0.247426	0.486858	0.517325	0.520901	0.218819	0.243777	0.263469			243.2	0.0928	0.066	0.0501	0.1479	0.1269	0.1094	0.1482	0.1327	0.1457	0.1316	0.1319	0.1413			243.2	0.0464	0.0015	0.0712	0.0789
621.8	0.321381	0.299473	0.315391	0.255608	0.257558	0.254325	0.648705	0.683744	0.754092	0.249689	0.284339	0.269662			621.8	0.271384	0.257338	0.261651	0.244984	0.247871	0.246147	0.48375	0.514008	0.517413	0.217728	0.242378	0.262069			243.6	0.0939	0.0663	0.051	0.1491	0.1282	0.1099	0.1488	0.1328	0.1464	0.1315	0.1323	0.1421			243.6	0.0462	0.002	0.0715	0.0796
622	0.318883	0.297046	0.312867	0.253706	0.255614	0.252376	0.642025	0.676992	0.746443	0.247863	0.281761	0.267894			622	0.269471	0.255328	0.259547	0.242972	0.246006	0.244354	0.479043	0.50875	0.511845	0.216445	0.23999	0.259926			244	0.0936	0.0656	0.05	0.149	0.1271	0.1097	0.1482	0.1333	0.1456	0.1317	0.1325	0.142			244	0.0468	0.0009	0.0707	0.0798
622.2	0.317629	0.295788	0.311654	0.252753	0.254594	0.251343	0.638719	0.673718	0.742576	0.246781	0.280688	0.266743			622.2	0.268458	0.254395	0.258547	0.241927	0.245092	0.243434	0.476784	0.506086	0.509047	0.21563	0.239232	0.258643			244.4	0.0926	0.065	0.0508	0.1478	0.127	0.1108	0.1474	0.1323	0.1474	0.1321	0.1325	0.1421			244.4	0.0466	0.0015	0.0708	0.0789
622.4	0.315066	0.293456	0.309226	0.250819	0.252617	0.249521	0.632269	0.667019	0.73513	0.245162	0.278077	0.264752			622.4	0.266185	0.252436	0.256515	0.23996	0.24328	0.241552	0.472052	0.501067	0.503889	0.214092	0.237286	0.25647			244.8	0.0932	0.0656	0.0501	0.1487	0.1272	0.1102	0.1479	0.1332	0.147	0.1315	0.1315	0.1426			244.8	0.0468	0.0024	0.0709	0.0791
622.6	0.313022	0.29141	0.307222	0.249195	0.250976	0.24792	0.62686	0.66122	0.729195	0.243634	0.276383	0.263293			622.6	0.264391	0.250738	0.254837	0.238462	0.241651	0.240052	0.467952	0.496815	0.499931	0.212627	0.235734	0.254757			245.2	0.093	0.066	0.0518	0.1486	0.1284	0.1101	0.1486	0.1338	0.1475	0.1324	0.1338	0.1415			245.2	0.0473	0.0026	0.0706	0.0792
622.8	0.311243	0.28989	0.305618	0.247913	0.249655	0.246644	0.622598	0.656689	0.724453	0.242382	0.274972	0.261906			622.8	0.263063	0.249414	0.25346	0.237233	0.240294	0.238802	0.464886	0.493368	0.496688	0.211595	0.234497	0.253425			245.6	0.0927	0.0654	0.0502	0.1478	0.1267	0.1089	0.147	0.1327	0.1467	0.1313	0.1311	0.1419			245.6	0.0461	0.0007	0.0707	0.0797
623	0.308632	0.287585	0.303158	0.245863	0.247574	0.244755	0.616241	0.65045	0.717128	0.240465	0.272573	0.259946			623	0.260978	0.24737	0.251514	0.235405	0.238366	0.237037	0.460556	0.488615	0.49156	0.210073	0.232478	0.251347			246	0.0937	0.067	0.0508	0.1484	0.1274	0.1095	0.1473	0.1338	0.1468	0.1318	0.1325	0.1417			246	0.0464	0.0023	0.071	0.0801
623.2	0.307397	0.286441	0.30204	0.244926	0.246566	0.243833	0.613122	0.647593	0.713245	0.239345	0.27132	0.259012			623.2	0.259916	0.246368	0.250551	0.234497	0.237367	0.236134	0.458295	0.486265	0.489079	0.209268	0.231236	0.250541			246.4	0.0931	0.0652	0.0504	0.1475	0.1264	0.1099	0.1466	0.1333	0.1466	0.1313	0.1326	0.1417			246.4	0.0466	0.0019	0.0699	0.0803
623.4	0.304839	0.28381	0.299608	0.242975	0.244693	0.2418	0.607255	0.641058	0.705969	0.237497	0.269055	0.256748			623.4	0.257861	0.244449	0.248635	0.232576	0.235525	0.23424	0.454007	0.481406	0.484058	0.207795	0.229199	0.248367			246.8	0.0946	0.0669	0.051	0.1492	0.1286	0.1099	0.1473	0.1339	0.1462	0.1324	0.1337	0.1429			246.8	0.0479	0.002	0.0714	0.0805
623.6	0.302751	0.281919	0.297592	0.24126	0.243217	0.240154	0.602331	0.635756	0.700138	0.23604	0.267351	0.25517			623.6	0.25614	0.242876	0.246975	0.23111	0.234011	0.232605	0.450282	0.477327	0.479959	0.206562	0.227627	0.246852			247.2	0.0933	0.065	0.0509	0.1478	0.127	0.1113	0.1464	0.133	0.1466	0.132	0.1311	0.1419			247.2	0.0472	0.0025	0.0708	0.0797
623.8	0.30115	0.280486	0.295928	0.239944	0.242008	0.238842	0.598483	0.631709	0.695525	0.234914	0.265818	0.253823			623.8	0.254742	0.241587	0.245684	0.229963	0.232778	0.231359	0.447277	0.474111	0.476638	0.205409	0.226273	0.245566			247.6	0.0946	0.0666	0.0504	0.1496	0.1276	0.1096	0.1483	0.133	0.1465	0.1326	0.1323	0.1422			247.6	0.0473	0.0021	0.071	0.0798
624	0.298731	0.278271	0.29364	0.237933	0.239946	0.236892	0.592573	0.62567	0.688484	0.233042	0.263548	0.251942			624	0.252694	0.239652	0.243765	0.22805	0.231028	0.2295	0.443003	0.469602	0.472147	0.203893	0.224276	0.243781			248	0.0935	0.0671	0.0513	0.1488	0.1275	0.1101	0.1483	0.1333	0.1478	0.1316	0.1317	0.1431			248	0.0466	0.0025	0.0722	0.0804
624.2	0.297567	0.277215	0.292464	0.237059	0.239065	0.23588	0.589665	0.623002	0.684856	0.232072	0.262441	0.25116			624.2	0.251618	0.238653	0.24279	0.227189	0.230139	0.228499	0.440793	0.467582	0.469785	0.203103	0.22336	0.242832			248.4	0.0934	0.0668	0.0507	0.1499	0.1276	0.11	0.149	0.1348	0.1466	0.1324	0.1323	0.1422			248.4	0.0466	0.0027	0.0714	0.0801
624.4	0.295027	0.274832	0.290161	0.235097	0.237281	0.234053	0.584221	0.616761	0.678315	0.230138	0.260528	0.249141			624.4	0.249715	0.23681	0.24087	0.22539	0.228493	0.226731	0.436748	0.463096	0.465313	0.201754	0.221662	0.241221			248.8	0.0953	0.0662	0.0522	0.1504	0.1275	0.1108	0.1482	0.1339	0.1466	0.1327	0.1319	0.1419			248.8	0.0479	0.0023	0.0712	0.0811
624.6	0.293024	0.273084	0.288211	0.233507	0.235716	0.232591	0.579578	0.611903	0.672962	0.228542	0.259006	0.247506			624.6	0.24804	0.235266	0.23921	0.223871	0.226939	0.225285	0.433526	0.459383	0.461886	0.200516	0.220321	0.239575			249.2	0.0938	0.0661	0.0518	0.1501	0.128	0.1117	0.1484	0.133	0.1474	0.1314	0.1339	0.1428			249.2	0.0472	0.0025	0.0719	0.0802
624.8	0.29143	0.271633	0.286577	0.232202	0.234509	0.231421	0.575883	0.607969	0.668592	0.227431	0.25785	0.246199			624.8	0.246728	0.233925	0.237846	0.222691	0.225781	0.224163	0.430956	0.456423	0.458968	0.199724	0.219272	0.237991			249.6	0.0951	0.0669	0.0513	0.1489	0.1276	0.1092	0.1485	0.1332	0.1464	0.1311	0.1327	0.141			249.6	0.0474	0.0025	0.0714	0.0799
625	0.288871	0.2695	0.284263	0.230423	0.232785	0.229515	0.570672	0.6024	0.662284	0.225557	0.255785	0.24481			625	0.244667	0.232018	0.235811	0.220957	0.223948	0.222415	0.426768	0.451981	0.45457	0.198181	0.217794	0.236165			250	0.0937	0.0672	0.0515	0.1486	0.1274	0.1115	0.1484	0.1338	0.147	0.1314	0.1318	0.1424			250	0.0467	0.0031	0.0725	0.0806
625.2	0.287605	0.268374	0.283042	0.229542	0.231844	0.228606	0.567874	0.599504	0.659063	0.224673	0.254713	0.243975			625.2	0.243656	0.231028	0.234855	0.220235	0.223104	0.221564	0.424678	0.450019	0.452693	0.197321	0.216947	0.235303			250.4	0.0943	0.0673	0.0509	0.1492	0.1282	0.1104	0.1483	0.1344	0.1469	0.1324	0.1327	0.1407			250.4	0.0472	0.0024	0.0716	0.0813
625.4	0.285298	0.266324	0.280616	0.227675	0.230069	0.226778	0.562562	0.593864	0.652695	0.222728	0.252756	0.241923			625.4	0.241604	0.229133	0.233019	0.218562	0.2214	0.219774	0.420682	0.445792	0.448625	0.195515	0.215475	0.233462			250.8	0.0945	0.0665	0.0517	0.1498	0.128	0.1116	0.1487	0.134	0.146	0.1327	0.1325	0.1421			250.8	0.0477	0.0028	0.0716	0.0815
625.6	0.283694	0.264892	0.279031	0.226464	0.228838	0.225608	0.55907	0.590286	0.648451	0.221411	0.251499	0.240612			625.6	0.240306	0.227881	0.231683	0.217472	0.220121	0.218588	0.418016	0.443198	0.445776	0.194518	0.214271	0.232111			251.2	0.094	0.0661	0.0516	0.1493	0.1287	0.1115	0.1477	0.1334	0.1462	0.1312	0.1322	0.1431			251.2	0.0469	0.0019	0.0707	0.08
625.8	0.281699	0.263124	0.277019	0.225053	0.227365	0.224161	0.554723	0.585728	0.643121	0.21977	0.249919	0.238997			625.8	0.238742	0.226395	0.229984	0.21603	0.218623	0.217089	0.414905	0.439873	0.442148	0.193474	0.212873	0.230628			251.6	0.0929	0.0669	0.05	0.1488	0.127	0.1107	0.1477	0.1327	0.146	0.131	0.1312	0.1413			251.6	0.047	0.0022	0.0711	0.0801
626	0.279461	0.260874	0.274786	0.223211	0.225598	0.22234	0.550022	0.580311	0.636455	0.217983	0.247848	0.237553			626	0.236763	0.224611	0.228205	0.214206	0.216983	0.215269	0.411442	0.435865	0.437804	0.191871	0.210999	0.228836			252	0.0953	0.0671	0.0519	0.1496	0.1276	0.1105	0.1483	0.133	0.1468	0.1315	0.1319	0.1413			252	0.0472	0.0011	0.0724	0.0799
626.2	0.278338	0.259901	0.273741	0.222311	0.22481	0.221448	0.547625	0.577723	0.633744	0.217205	0.246982	0.236714			626.2	0.235826	0.223712	0.227368	0.213315	0.216227	0.214457	0.409581	0.433941	0.435743	0.191325	0.210235	0.227881			252.4	0.094	0.0673	0.0498	0.1477	0.1283	0.1102	0.1462	0.1339	0.1458	0.1312	0.1324	0.1413			252.4	0.0462	0.0022	0.071	0.0792
626.4	0.276061	0.257587	0.271168	0.220426	0.223152	0.21968	0.542817	0.571901	0.628137	0.21564	0.245129	0.23478			626.4	0.233869	0.222036	0.225419	0.211503	0.214557	0.212854	0.406208	0.430143	0.431821	0.189578	0.208754	0.225891			252.8	0.0955	0.0658	0.0519	0.1489	0.1277	0.1119	0.1476	0.1331	0.1473	0.132	0.1324	0.1426			252.8	0.047	0.0015	0.0722	0.0798
626.6	0.274586	0.256314	0.269719	0.219228	0.221972	0.218621	0.539337	0.568623	0.624297	0.214514	0.243955	0.233626			626.6	0.232611	0.220845	0.224182	0.21043	0.213454	0.211751	0.403705	0.427705	0.429309	0.188667	0.207763	0.224706			253.2	0.0937	0.0663	0.0515	0.1498	0.1284	0.1113	0.1472	0.1326	0.1471	0.1306	0.1319	0.1416			253.2	0.0468	0.0017	0.0719	0.0804
626.8	0.272762	0.25463	0.267824	0.217846	0.22042	0.217203	0.535168	0.564716	0.619713	0.213264	0.242223	0.232107			626.8	0.230993	0.219393	0.222645	0.209003	0.211962	0.210407	0.400628	0.42489	0.426278	0.18747	0.20628	0.223235			253.6	0.0947	0.0677	0.0515	0.1494	0.1276	0.1107	0.1486	0.1343	0.1458	0.1311	0.1333	0.1419			253.6	0.0467	0.0025	0.0718	0.0806
627	0.270475	0.252525	0.265515	0.216183	0.218634	0.215499	0.530517	0.559755	0.614371	0.211587	0.240621	0.230285			627	0.229233	0.217589	0.220753	0.207264	0.210213	0.208672	0.397429	0.421584	0.422821	0.186205	0.204719	0.221389			254	0.0941	0.0675	0.0505	0.1487	0.129	0.1107	0.1479	0.1335	0.1457	0.1318	0.1326	0.1412			254	0.047	0.0024	0.0709	0.0799
627.2	0.269274	0.251397	0.264405	0.215294	0.217851	0.21464	0.528043	0.557285	0.611876	0.210873	0.239601	0.22922			627.2	0.228287	0.216701	0.219798	0.20639	0.20936	0.207813	0.395658	0.419671	0.421153	0.185488	0.203826	0.220288			254.4	0.0945	0.0669	0.0522	0.1497	0.1267	0.112	0.1486	0.1332	0.1461	0.1318	0.1311	0.1425			254.4	0.0476	0.0017	0.0724	0.0812
627.4	0.26703	0.249212	0.262214	0.213696	0.216139	0.212997	0.523583	0.552066	0.606424	0.209202	0.237891	0.227481			627.4	0.226251	0.215054	0.218036	0.204805	0.207642	0.206116	0.392264	0.415996	0.41716	0.184148	0.202463	0.218378			254.8	0.0944	0.0673	0.0509	0.1493	0.1279	0.1124	0.1486	0.1335	0.1474	0.1315	0.1323	0.1427			254.8	0.0474	0.0022	0.0725	0.0806
627.6	0.264833	0.2472	0.259916	0.212023	0.214373	0.211277	0.519049	0.54733	0.601027	0.2076	0.235904	0.225672			627.6	0.224436	0.213457	0.216097	0.203124	0.205904	0.204449	0.388728	0.412504	0.413336	0.182692	0.200924	0.216607			255.2	0.0959	0.0661	0.0508	0.1502	0.1268	0.111	0.1479	0.1333	0.1463	0.1326	0.1319	0.1417			255.2	0.0474	0.0029	0.0714	0.0813
627.8	0.263861	0.246127	0.258778	0.211179	0.213581	0.210335	0.516814	0.544851	0.598565	0.206826	0.235041	0.224837			627.8	0.223589	0.212562	0.215261	0.202304	0.205043	0.203598	0.386961	0.410729	0.411413	0.181823	0.200122	0.215721			255.6	0.0955	0.0658	0.0516	0.1502	0.1271	0.1112	0.1477	0.1321	0.1456	0.1324	0.1317	0.142			255.6	0.0478	0.0017	0.0712	0.0812
628	0.26161	0.244072	0.256755	0.209432	0.211937	0.20862	0.512423	0.540154	0.593435	0.205123	0.232821	0.223291			628	0.221753	0.210907	0.213504	0.200664	0.203316	0.20198	0.383739	0.40741	0.40798	0.180401	0.198291	0.214294			256	0.0946	0.0665	0.0514	0.1489	0.1265	0.1113	0.1471	0.1325	0.1458	0.1315	0.1321	0.1422			256	0.0468	0.002	0.0716	0.0803
628.2	0.259892	0.242477	0.254976	0.207965	0.210531	0.207252	0.509086	0.53622	0.589163	0.203603	0.23133	0.221713			628.2	0.220311	0.209532	0.212075	0.199237	0.201937	0.20066	0.381036	0.40469	0.405242	0.179104	0.197065	0.212841			256.4	0.0949	0.0674	0.0518	0.1496	0.1267	0.1108	0.1488	0.1327	0.1451	0.1316	0.132	0.1417			256.4	0.0477	0.0025	0.0718	0.0804
628.4	0.258517	0.241151	0.25363	0.206818	0.209359	0.206109	0.506396	0.533282	0.585996	0.202403	0.230215	0.220156			628.4	0.219153	0.20847	0.210982	0.198204	0.20086	0.19949	0.379112	0.40236	0.403219	0.178107	0.19603	0.211456			256.8	0.0949	0.0682	0.0521	0.1493	0.129	0.1126	0.1487	0.1344	0.1471	0.1323	0.1344	0.1426			256.8	0.0477	0.0036	0.0725	0.0807
628.6	0.256335	0.239188	0.251568	0.205191	0.207619	0.204525	0.502254	0.528789	0.581116	0.200687	0.228498	0.218167			628.6	0.217441	0.206941	0.209235	0.196675	0.199143	0.197942	0.376035	0.39904	0.399842	0.17681	0.194316	0.209637			257.2	0.0948	0.0679	0.052	0.1476	0.128	0.1117	0.1493	0.1338	0.1483	0.1308	0.1316	0.1419			257.2	0.0464	0.0032	0.073	0.0796
628.8	0.255284	0.238196	0.250471	0.204446	0.206803	0.203553	0.500053	0.526357	0.578553	0.19984	0.227694	0.217185			628.8	0.216603	0.206098	0.208451	0.195942	0.198415	0.19716	0.374399	0.397484	0.398231	0.176211	0.193673	0.208948			257.6	0.0957	0.0683	0.0515	0.1514	0.1285	0.1124	0.1473	0.1346	0.1465	0.1329	0.1331	0.1417			257.6	0.0481	0.0031	0.0723	0.0805
629	0.253366	0.236158	0.248388	0.202714	0.205094	0.201973	0.49601	0.522193	0.573993	0.198314	0.225848	0.215422			629	0.214921	0.204418	0.206814	0.194389	0.196904	0.195638	0.371034	0.39434	0.395245	0.174806	0.192093	0.207184			258	0.0953	0.0684	0.0523	0.1498	0.128	0.1103	0.1487	0.1342	0.1466	0.1308	0.1308	0.1421			258	0.0474	0.0028	0.0728	0.0815
629.2	0.251992	0.234991	0.246941	0.201657	0.204032	0.200904	0.493173	0.51944	0.571031	0.197219	0.224759	0.214232			629.2	0.213785	0.203304	0.20569	0.193365	0.195825	0.194646	0.368822	0.392378	0.393264	0.173886	0.191232	0.206083			258.4	0.0962	0.068	0.0522	0.1501	0.1278	0.1128	0.1482	0.1337	0.1464	0.1319	0.1323	0.143			258.4	0.0482	0.0036	0.073	0.0817
629.4	0.250368	0.233353	0.245108	0.200318	0.202589	0.199605	0.489664	0.51559	0.567087	0.195791	0.223378	0.212823			629.4	0.212308	0.201867	0.204222	0.192044	0.194498	0.193319	0.366352	0.389612	0.390725	0.172614	0.190022	0.204769			258.8	0.0936	0.0675	0.0528	0.1485	0.1279	0.1117	0.1474	0.1324	0.1466	0.1299	0.1309	0.1423			258.8	0.0466	0.0036	0.0728	0.0801
629.6	0.248254	0.231555	0.243211	0.198754	0.200872	0.197943	0.485675	0.511559	0.562506	0.194257	0.221644	0.211019			629.6	0.210699	0.200139	0.202616	0.190613	0.192881	0.191633	0.363408	0.386499	0.387709	0.171329	0.188242	0.203067			259.2	0.0944	0.0667	0.0522	0.1492	0.1262	0.1121	0.1479	0.1325	0.147	0.1318	0.1312	0.1413			259.2	0.0469	0.0028	0.0728	0.0804
629.8	0.2472	0.230544	0.242141	0.197881	0.200103	0.197143	0.483992	0.509423	0.56026	0.193616	0.220613	0.210106			629.8	0.209881	0.1993	0.201794	0.189796	0.192085	0.190821	0.362141	0.384819	0.3863	0.170748	0.187384	0.202405			259.6	0.0957	0.0682	0.0525	0.1489	0.1285	0.1116	0.1474	0.1334	0.1465	0.1316	0.1326	0.1422			259.6	0.0475	0.0023	0.0727	0.0802
630	0.245131	0.22864	0.24013	0.196244	0.198492	0.195722	0.480101	0.505297	0.555679	0.191901	0.218778	0.208112			630	0.208192	0.197719	0.200208	0.188229	0.190603	0.189333	0.35925	0.381773	0.383225	0.169304	0.185823	0.200854			260	0.0962	0.0677	0.0525	0.1499	0.1279	0.1118	0.1479	0.1333	0.1472	0.1323	0.1325	0.1421			260	0.0481	0.0031	0.0731	0.0812
630.2	0.243753	0.227296	0.238914	0.195267	0.197438	0.194674	0.477536	0.502613	0.552667	0.190784	0.217662	0.207121			630.2	0.207004	0.196723	0.199158	0.187236	0.18965	0.188347	0.357281	0.379769	0.381146	0.168256	0.185014	0.199835			260.4	0.095	0.0674	0.0518	0.1493	0.1283	0.111	0.148	0.133	0.1473	0.1325	0.1309	0.1417			260.4	0.0475	0.0031	0.0726	0.0813
630.4	0.242147	0.225744	0.23735	0.194024	0.196116	0.193416	0.474383	0.499356	0.54907	0.189387	0.216333	0.206001			630.4	0.205618	0.19544	0.197961	0.185973	0.188357	0.187284	0.355017	0.377395	0.378459	0.167045	0.183992	0.198665			260.8	0.0952	0.068	0.0532	0.15	0.1274	0.1129	0.1483	0.1327	0.1463	0.1314	0.1318	0.1426			260.8	0.0478	0.0029	0.0739	0.0815
630.6	0.240018	0.223893	0.235362	0.192364	0.194566	0.191828	0.470599	0.495159	0.544861	0.187811	0.214379	0.204132			630.6	0.204026	0.193801	0.196364	0.18441	0.18682	0.185819	0.352263	0.374243	0.375217	0.1656	0.182509	0.197302			261.2	0.0946	0.0676	0.0519	0.1483	0.1275	0.1123	0.1471	0.1327	0.1465	0.1302	0.132	0.142			261.2	0.0471	0.0026	0.0725	0.0804
630.8	0.238309	0.222335	0.233724	0.191097	0.193207	0.190527	0.46742	0.491959	0.541288	0.186569	0.213064	0.202633			630.8	0.202682	0.192354	0.195066	0.183175	0.185535	0.184574	0.349981	0.371751	0.372928	0.164354	0.181184	0.195787			261.6	0.0955	0.0678	0.0517	0.1497	0.1291	0.1116	0.1475	0.1321	0.1468	0.132	0.1318	0.1418			261.6	0.0479	0.0024	0.0727	0.0814
631	0.236938	0.221052	0.232482	0.190105	0.192144	0.189541	0.464894	0.489438	0.538448	0.185487	0.211936	0.201557			631	0.201558	0.19123	0.194013	0.182171	0.184587	0.183556	0.348088	0.36988	0.371063	0.163414	0.180206	0.194716			262	0.0954	0.0688	0.0531	0.1478	0.1277	0.1126	0.1479	0.1339	0.1468	0.131	0.1323	0.142			262	0.0483	0.0033	0.0738	0.082
631.2	0.23493	0.219109	0.230363	0.188641	0.190672	0.187942	0.461351	0.485985	0.534573	0.183922	0.210283	0.19986			631.2	0.199997	0.189645	0.192447	0.180688	0.183137	0.182018	0.345203	0.367116	0.368107	0.161998	0.179002	0.193052			262.4	0.0963	0.0674	0.0525	0.1492	0.1277	0.1123	0.1473	0.1334	0.1465	0.1324	0.1318	0.1413			262.4	0.048	0.0024	0.0731	0.0809
631.4	0.233951	0.218148	0.229412	0.188003	0.18994	0.187295	0.459502	0.484265	0.532709	0.183094	0.2096	0.198837			631.4	0.199133	0.188863	0.191618	0.179994	0.182485	0.181232	0.344071	0.365405	0.366844	0.161392	0.178515	0.192299			262.8	0.0963	0.0685	0.0533	0.1492	0.1281	0.1125	0.1482	0.1328	0.1468	0.1319	0.1324	0.143			262.8	0.0483	0.0036	0.0738	0.0823
631.6	0.231989	0.216288	0.227551	0.186466	0.18849	0.185697	0.455845	0.480756	0.528554	0.181918	0.207585	0.197236			631.6	0.19746	0.187272	0.190107	0.178389	0.181015	0.179776	0.341448	0.362458	0.36374	0.160407	0.176967	0.190863			263.2	0.0956	0.0683	0.0526	0.149	0.1282	0.1123	0.1478	0.1329	0.147	0.1329	0.1321	0.142			263.2	0.0474	0.0032	0.0733	0.0809
631.8	0.230641	0.215073	0.22629	0.185455	0.187495	0.184735	0.45369	0.478549	0.525967	0.180964	0.206409	0.196304			631.8	0.196312	0.186181	0.189058	0.17734	0.180072	0.178718	0.339814	0.360936	0.361872	0.159451	0.175926	0.189829			263.6	0.0956	0.0693	0.0534	0.1494	0.1282	0.1118	0.1473	0.1339	0.1467	0.1304	0.1319	0.1418			263.6	0.0476	0.0034	0.0739	0.0806
632	0.228995	0.213567	0.224755	0.184179	0.186179	0.183618	0.451032	0.475825	0.522822	0.179819	0.204899	0.195039			632	0.19497	0.18495	0.18772	0.176068	0.178802	0.177452	0.337869	0.358705	0.359539	0.158337	0.17468	0.188495			264	0.0953	0.0689	0.0526	0.1486	0.1273	0.1123	0.1485	0.1337	0.1467	0.1322	0.1321	0.1411			264	0.0479	0.0043	0.0729	0.0807
632.2	0.226981	0.211973	0.223018	0.182719	0.18461	0.182139	0.447666	0.472487	0.519026	0.178341	0.203149	0.193584			632.2	0.193462	0.183482	0.186234	0.174595	0.177407	0.17598	0.335587	0.356174	0.356495	0.156867	0.173175	0.187075			264.4	0.0964	0.0681	0.0527	0.1498	0.1271	0.1127	0.148	0.1333	0.1473	0.1324	0.1309	0.1419			264.4	0.0481	0.0021	0.0739	0.082
632.4	0.226052	0.211055	0.222227	0.181967	0.183798	0.181377	0.446149	0.470958	0.517348	0.177639	0.202143	0.192707			632.4	0.192634	0.182751	0.185385	0.173998	0.176606	0.175256	0.334579	0.35497	0.35501	0.156382	0.172416	0.186237			264.8	0.0967	0.0677	0.0523	0.1492	0.1286	0.1134	0.1486	0.1328	0.1479	0.133	0.1328	0.1424			264.8	0.0482	0.0035	0.0726	0.0821
632.6	0.223921	0.209224	0.220443	0.180473	0.182452	0.179952	0.442845	0.467712	0.513375	0.176217	0.200559	0.19104			632.6	0.190983	0.181201	0.183845	0.172646	0.175277	0.173762	0.332246	0.352257	0.352367	0.154989	0.171062	0.184586			265.2	0.0963	0.0697	0.0525	0.1506	0.1276	0.1122	0.1493	0.1331	0.1473	0.1325	0.1328	0.1421			265.2	0.0481	0.0038	0.0745	0.0826
632.8	0.222723	0.208093	0.219151	0.179455	0.181531	0.17904	0.440605	0.465735	0.510782	0.175226	0.199588	0.190167			632.8	0.189905	0.180268	0.182745	0.171693	0.174363	0.172772	0.330518	0.350514	0.350703	0.154168	0.170302	0.183634			265.6	0.0963	0.0679	0.0528	0.1495	0.1283	0.1123	0.1492	0.1335	0.1465	0.1333	0.1314	0.1422			265.6	0.0484	0.0028	0.0728	0.0821
633	0.221154	0.206692	0.217626	0.178211	0.180303	0.177838	0.437854	0.463062	0.507615	0.173928	0.198446	0.188958			633	0.188542	0.17911	0.181518	0.170556	0.173209	0.171562	0.328334	0.348437	0.348518	0.153005	0.169306	0.182431			266	0.096	0.0688	0.0534	0.1495	0.1289	0.1126	0.148	0.1325	0.1466	0.1319	0.1321	0.1422			266	0.048	0.0035	0.0733	0.0811
633.2	0.219371	0.205	0.215823	0.176771	0.178914	0.176325	0.434836	0.459537	0.504082	0.172684	0.197099	0.187674			633.2	0.187039	0.177591	0.179939	0.169235	0.171826	0.170119	0.32586	0.345431	0.346028	0.1517	0.167976	0.180915			266.4	0.0952	0.0688	0.0536	0.1494	0.1288	0.1126	0.148	0.1329	0.147	0.1313	0.1317	0.1436			266.4	0.0478	0.0018	0.0743	0.0814
633.4	0.217886	0.203709	0.214244	0.175488	0.177636	0.175159	0.432245	0.456752	0.501172	0.171454	0.195644	0.18642			633.4	0.185761	0.176308	0.17876	0.168091	0.170656	0.168857	0.323784	0.343075	0.343905	0.150603	0.166677	0.179933			266.8	0.0966	0.0687	0.0532	0.1505	0.1277	0.1126	0.1489	0.1316	0.1473	0.1319	0.1314	0.1417			266.8	0.0487	0.0031	0.0742	0.0819
633.6	0.216697	0.202634	0.212989	0.174511	0.176628	0.174206	0.430274	0.454655	0.49885	0.170508	0.194426	0.185283			633.6	0.184636	0.175293	0.177756	0.167194	0.169697	0.167835	0.321968	0.341408	0.342239	0.149777	0.16556	0.178885			267.2	0.0951	0.0689	0.053	0.1487	0.1273	0.1129	0.1477	0.1315	0.1462	0.1304	0.1314	0.1414			267.2	0.0472	0.0025	0.0745	0.0811
633.8	0.215079	0.201008	0.211097	0.173004	0.175145	0.172818	0.427446	0.451904	0.495557	0.169043	0.193049	0.183961			633.8	0.183205	0.173837	0.176271	0.165847	0.168244	0.166412	0.319513	0.339264	0.34034	0.148407	0.164039	0.177421			267.6	0.0961	0.0695	0.0526	0.15	0.1284	0.1124	0.1489	0.1328	0.1456	0.1313	0.1325	0.1413			267.6	0.0478	0.0034	0.0739	0.0814
634	0.214208	0.200121	0.210167	0.17233	0.174482	0.172175	0.426124	0.450624	0.493934	0.168416	0.192228	0.183461			634	0.182437	0.173167	0.175498	0.165127	0.167606	0.165702	0.318348	0.33836	0.338995	0.147922	0.163425	0.176809			268	0.0956	0.0699	0.0531	0.1502	0.1281	0.1119	0.1468	0.1327	0.1466	0.1315	0.1322	0.1422			268	0.0479	0.0032	0.0741	0.0812
634.2	0.212631	0.198536	0.208445	0.170934	0.173077	0.170892	0.42316	0.447476	0.490825	0.167438	0.190342	0.182012			634.2	0.180886	0.171815	0.174045	0.163866	0.16624	0.164331	0.316191	0.336037	0.336507	0.146723	0.162133	0.175549			268.4	0.0962	0.069	0.0523	0.1504	0.1284	0.1124	0.1474	0.134	0.1455	0.1318	0.133	0.1418			268.4	0.0476	0.0036	0.0729	0.0803
634.4	0.211605	0.197524	0.207366	0.17005	0.172094	0.170033	0.421218	0.445487	0.488548	0.166472	0.189423	0.181036			634.4	0.179883	0.170857	0.173117	0.162944	0.165364	0.163549	0.314889	0.334403	0.334965	0.14589	0.161262	0.174707			268.8	0.0954	0.0687	0.0531	0.1488	0.1269	0.1126	0.1463	0.1332	0.1467	0.131	0.1322	0.143			268.8	0.0467	0.0033	0.0742	0.0814
634.6	0.210177	0.19619	0.205995	0.168916	0.170926	0.16879	0.418664	0.443077	0.485658	0.165315	0.188081	0.180057			634.6	0.17858	0.169687	0.171985	0.161814	0.164219	0.162484	0.31302	0.332587	0.332685	0.144868	0.159903	0.173648			269.2	0.0967	0.069	0.0533	0.1501	0.1276	0.1127	0.1488	0.1335	0.146	0.1324	0.1339	0.1418			269.2	0.049	0.0033	0.074	0.0827
634.8	0.208448	0.194672	0.204235	0.1676	0.169553	0.167425	0.416057	0.439921	0.482598	0.163891	0.186778	0.178765			634.8	0.177174	0.168392	0.170485	0.160572	0.162879	0.161078	0.310806	0.330331	0.330494	0.143481	0.158675	0.17228			269.6	0.0968	0.0678	0.0532	0.1498	0.1271	0.114	0.1486	0.1323	0.1478	0.1331	0.1312	0.1414			269.6	0.0482	0.0026	0.0745	0.082
635	0.207541	0.193882	0.203415	0.166871	0.168813	0.16668	0.4146	0.438286	0.48102	0.163361	0.186136	0.178113			635	0.176502	0.167721	0.169717	0.160032	0.162248	0.160451	0.309486	0.329058	0.329315	0.142995	0.157994	0.17178			270	0.0962	0.0698	0.0541	0.1499	0.1286	0.1127	0.1482	0.1349	0.1466	0.1319	0.1339	0.1417			270	0.0488	0.0043	0.0737	0.0812
635.2	0.205926	0.19236	0.201719	0.165574	0.167546	0.165248	0.412	0.435457	0.47772	0.162038	0.184681	0.176776			635.2	0.174996	0.166197	0.168316	0.15876	0.160925	0.159232	0.30738	0.326709	0.327011	0.141906	0.156981	0.170413			270.4	0.0954	0.0686	0.0531	0.1487	0.1271	0.1134	0.147	0.1326	0.1472	0.13	0.1313	0.141			270.4	0.0468	0.0031	0.0741	0.0814
635.4	0.204786	0.191287	0.200597	0.164699	0.166722	0.164281	0.410332	0.433514	0.475601	0.161119	0.183848	0.175865			635.4	0.173917	0.165316	0.16743	0.157887	0.160098	0.158327	0.306097	0.325192	0.325683	0.141021	0.156132	0.16942			270.8	0.0969	0.0699	0.0532	0.1504	0.1288	0.112	0.1479	0.1343	0.1449	0.1325	0.1334	0.1409			270.8	0.0485	0.0043	0.0733	0.0819
635.6	0.203373	0.189925	0.199108	0.16364	0.165719	0.163125	0.407989	0.430995	0.472886	0.159838	0.182791	0.174637			635.6	0.172721	0.164201	0.166327	0.156758	0.1591	0.157214	0.304123	0.323399	0.324073	0.139841	0.155055	0.168124			271.2	0.0967	0.068	0.0533	0.1503	0.1271	0.1128	0.149	0.1329	0.1472	0.1323	0.1314	0.1402			271.2	0.0485	0.0027	0.0732	0.0824
635.8	0.20179	0.188444	0.197376	0.162288	0.164292	0.161774	0.405356	0.428477	0.470107	0.158709	0.181288	0.173408			635.8	0.171376	0.162879	0.164917	0.155492	0.157707	0.156081	0.301829	0.321202	0.32179	0.138625	0.153818	0.166916			271.6	0.0968	0.0696	0.0537	0.1498	0.1282	0.1118	0.1487	0.1337	0.1461	0.1314	0.132	0.1413			271.6	0.0497	0.0039	0.0736	0.0822
636	0.200651	0.187328	0.196334	0.161507	0.163362	0.16084	0.403716	0.426495	0.468122	0.15801	0.180233	0.172415			636	0.170393	0.161982	0.164144	0.154618	0.156841	0.155321	0.300362	0.319757	0.320255	0.137908	0.152955	0.166032			272	0.0964	0.0689	0.0529	0.1505	0.1282	0.1133	0.1486	0.1317	0.1469	0.1324	0.1327	0.142			272	0.049	0.0025	0.0741	0.0825
636.2	0.199357	0.185977	0.194971	0.16056	0.162248	0.159742	0.401501	0.42407	0.465727	0.157062	0.178905	0.171455			636.2	0.169255	0.160831	0.163013	0.15357	0.155786	0.154315	0.298534	0.318072	0.318403	0.136917	0.151894	0.164924			272.4	0.0974	0.0691	0.0541	0.1505	0.1265	0.1135	0.1476	0.1336	0.1468	0.1329	0.1306	0.1428			272.4	0.049	0.0031	0.0752	0.081
636.4	0.197757	0.184339	0.193278	0.159231	0.160963	0.158434	0.39915	0.421368	0.463068	0.155929	0.177264	0.170079			636.4	0.167851	0.159496	0.161718	0.152392	0.15448	0.153087	0.296807	0.316066	0.316539	0.135726	0.150708	0.163504			272.8	0.0961	0.0693	0.0534	0.1488	0.1283	0.1135	0.1473	0.1342	0.1464	0.1313	0.1336	0.1424			272.8	0.0478	0.0037	0.0735	0.0822
636.6	0.196955	0.183527	0.192447	0.158572	0.160298	0.157845	0.397964	0.420095	0.461314	0.155449	0.176568	0.169327			636.6	0.167085	0.158887	0.160959	0.151754	0.153814	0.152518	0.295802	0.315183	0.315429	0.135311	0.149996	0.162653			273.2	0.0966	0.0688	0.0545	0.1489	0.1264	0.1129	0.1474	0.1316	0.1464	0.1309	0.1316	0.1427			273.2	0.0476	0.0024	0.0749	0.0819
636.8	0.19531	0.182041	0.190868	0.15732	0.15919	0.156556	0.395436	0.417263	0.4583	0.154162	0.174998	0.167827			636.8	0.165819	0.157653	0.159697	0.150549	0.152586	0.151314	0.29388	0.312896	0.313424	0.134112	0.148786	0.161448			273.6	0.0977	0.07	0.0521	0.1505	0.1288	0.1125	0.1486	0.1331	0.1461	0.1315	0.1323	0.1414			273.6	0.048	0.0044	0.0738	0.0814
637	0.194202	0.181044	0.189874	0.156554	0.158341	0.155677	0.393642	0.415451	0.456224	0.153377	0.17384	0.1668			637	0.164883	0.156792	0.158819	0.149714	0.151793	0.150507	0.292703	0.311488	0.311904	0.13346	0.147961	0.160322			274	0.0967	0.0695	0.0542	0.1487	0.1273	0.1131	0.1481	0.1331	0.1482	0.1316	0.1313	0.1427			274	0.0487	0.0038	0.0749	0.0823
637.2	0.192818	0.179895	0.188661	0.155505	0.15729	0.154595	0.391305	0.41305	0.453757	0.152315	0.172505	0.165529			637.2	0.163671	0.155708	0.157733	0.148691	0.150741	0.149497	0.291056	0.309493	0.310251	0.132414	0.146959	0.159153			274.4	0.0974	0.0706	0.0539	0.1503	0.1282	0.1137	0.1484	0.1332	0.148	0.1321	0.1319	0.1425			274.4	0.0489	0.0037	0.0759	0.0827
637.4	0.191009	0.178268	0.187047	0.154089	0.156052	0.153245	0.388792	0.410172	0.450575	0.150982	0.171059	0.163944			637.4	0.16229	0.154497	0.156403	0.147401	0.149468	0.148305	0.289105	0.307196	0.308153	0.131244	0.145589	0.157797			274.8	0.0973	0.0702	0.054	0.1497	0.1278	0.1136	0.148	0.1326	0.1465	0.1317	0.1318	0.1413			274.8	0.0471	0.0043	0.075	0.0811
637.6	0.189841	0.177292	0.185991	0.153283	0.155228	0.152403	0.387038	0.408391	0.448485	0.150283	0.170085	0.162993			637.6	0.161389	0.153728	0.155556	0.146586	0.14872	0.147381	0.287663	0.305809	0.306777	0.130557	0.144809	0.156831			275.2	0.0974	0.0695	0.0539	0.1497	0.1278	0.1125	0.149	0.1329	0.1467	0.1325	0.1315	0.1424			275.2	0.0499	0.0032	0.0751	0.0819
637.8	0.188461	0.176112	0.184683	0.152249	0.154157	0.15137	0.385049	0.406001	0.446108	0.149355	0.168973	0.161602			637.8	0.160346	0.152673	0.154465	0.145581	0.147737	0.146299	0.286035	0.304206	0.305281	0.129685	0.143864	0.155576			275.6	0.0966	0.0699	0.0544	0.1491	0.1281	0.1137	0.148	0.1324	0.1458	0.1318	0.1326	0.1423			275.6	0.0483	0.0039	0.0746	0.0824
638	0.186884	0.174672	0.183211	0.150991	0.152959	0.15021	0.382385	0.403489	0.443136	0.148293	0.167578	0.160155			638	0.158953	0.151221	0.15318	0.144354	0.146565	0.145316	0.283773	0.302304	0.303232	0.12857	0.142561	0.154373			276	0.098	0.0701	0.0536	0.1499	0.1271	0.1128	0.1488	0.1326	0.1472	0.1322	0.1313	0.1415			276	0.0489	0.004	0.0756	0.0829
638.2	0.186155	0.173891	0.182448	0.150437	0.152354	0.149661	0.381238	0.4022	0.441639	0.147635	0.166835	0.159486			638.2	0.158267	0.15056	0.152494	0.143728	0.145953	0.144737	0.28295	0.301344	0.302361	0.128112	0.141971	0.153662			276.4	0.0968	0.07	0.0532	0.1495	0.1285	0.114	0.1478	0.134	0.1466	0.1315	0.132	0.1409			276.4	0.0484	0.004	0.0743	0.0815
638.4	0.184529	0.172296	0.180989	0.149192	0.15112	0.148505	0.378531	0.399606	0.438904	0.146403	0.16532	0.158128			638.4	0.156878	0.14945	0.15124	0.142509	0.144737	0.143475	0.281078	0.299404	0.300622	0.126835	0.140535	0.15239			276.8	0.0969	0.0705	0.0532	0.1496	0.1271	0.1135	0.1482	0.1334	0.1461	0.1328	0.1311	0.1415			276.8	0.0494	0.0035	0.0751	0.0817
638.6	0.183487	0.171288	0.179973	0.148373	0.150253	0.147714	0.376833	0.397672	0.437104	0.145782	0.164286	0.157189			638.6	0.156031	0.148541	0.15032	0.141691	0.143854	0.1427	0.279751	0.297995	0.299252	0.126312	0.139852	0.151628			277.2	0.0971	0.0702	0.0538	0.1498	0.1284	0.1139	0.1485	0.1324	0.146	0.1324	0.1329	0.1421			277.2	0.0496	0.0036	0.0746	0.0837
638.8	0.182199	0.17009	0.178704	0.147384	0.149137	0.146669	0.374836	0.395517	0.434774	0.145075	0.162992	0.156124			638.8	0.15501	0.147472	0.14921	0.140668	0.142744	0.1418	0.278206	0.296254	0.297438	0.12555	0.138841	0.150684			277.6	0.097	0.0691	0.0529	0.15	0.1277	0.1136	0.1481	0.1328	0.1457	0.1312	0.1318	0.1419			277.6	0.049	0.0034	0.0742	0.0817
639	0.180721	0.16859	0.177248	0.146237	0.14791	0.145548	0.372182	0.392856	0.431806	0.143828	0.161616	0.154546			639	0.153621	0.146346	0.147956	0.139429	0.141523	0.140543	0.276421	0.294286	0.295215	0.124553	0.137677	0.149206			278	0.0971	0.0702	0.0545	0.1495	0.1276	0.1136	0.1475	0.1323	0.1463	0.1319	0.1333	0.1419			278	0.0498	0.0038	0.0755	0.0824
639.2	0.179604	0.167704	0.176295	0.145426	0.147122	0.144732	0.37057	0.391173	0.429953	0.14275	0.160651	0.153614			639.2	0.152756	0.145491	0.147067	0.138687	0.140728	0.139676	0.275268	0.292887	0.29397	0.123758	0.136964	0.148466			278.4	0.0975	0.0701	0.0538	0.1491	0.1278	0.114	0.1479	0.134	0.1473	0.1308	0.1308	0.1411			278.4	0.0484	0.0035	0.0748	0.0812
639.4	0.178252	0.1666	0.174987	0.144363	0.146133	0.143696	0.368523	0.389386	0.427595	0.141632	0.159486	0.152311			639.4	0.151669	0.144463	0.145982	0.13773	0.139715	0.138626	0.273797	0.291233	0.29251	0.122972	0.136037	0.147385			278.8	0.0969	0.0707	0.0538	0.1497	0.1295	0.1124	0.1484	0.133	0.1473	0.1317	0.132	0.1423			278.8	0.049	0.0046	0.075	0.0828
639.6	0.176583	0.165288	0.173659	0.143236	0.144843	0.142395	0.36608	0.386898	0.424592	0.140338	0.158153	0.151019			639.6	0.150458	0.143339	0.144636	0.136509	0.13862	0.137511	0.272071	0.289196	0.290255	0.121934	0.134778	0.146246			279.2	0.0978	0.0706	0.0538	0.1502	0.1282	0.114	0.1483	0.1337	0.1461	0.1307	0.1333	0.1407			279.2	0.0486	0.0035	0.0753	0.0817
639.8	0.175873	0.164685	0.172926	0.142659	0.144275	0.141762	0.364662	0.385668	0.423302	0.13963	0.157456	0.150331			639.8	0.149877	0.142704	0.144038	0.135931	0.138023	0.136932	0.271144	0.288294	0.289304	0.121331	0.134046	0.145726			279.6	0.0973	0.0697	0.0538	0.1495	0.1279	0.113	0.1472	0.1335	0.1457	0.1309	0.1309	0.1415			279.6	0.0483	0.0034	0.0744	0.0826
640	0.174357	0.163153	0.171374	0.141498	0.143011	0.14064	0.362271	0.383244	0.420629	0.138562	0.156344	0.149181			640	0.148564	0.14146	0.142763	0.134848	0.136866	0.135722	0.26934	0.286243	0.287201	0.12039	0.133044	0.144301			280	0.0977	0.0708	0.0552	0.1498	0.1296	0.1162	0.1482	0.1341	0.147	0.1325	0.1332	0.1436			280	0.049	0.0053	0.0759	0.0825
640.2	0.173252	0.162217	0.170411	0.140649	0.142224	0.139946	0.360762	0.381545	0.418769	0.137732	0.155632	0.14845			640.2	0.147739	0.140709	0.141964	0.134075	0.136121	0.134968	0.26811	0.284823	0.28598	0.119605	0.132313	0.143638			280.4	0.0979	0.0694	0.055	0.1492	0.1273	0.1149	0.1487	0.1329	0.1473	0.1324	0.1319	0.143			280.4	0.0497	0.0031	0.0759	0.0829
640.4	0.172005	0.161009	0.169093	0.139572	0.141231	0.138963	0.358961	0.379586	0.416477	0.13684	0.154675	0.147476			640.4	0.146689	0.139687	0.140987	0.133167	0.135264	0.134048	0.266745	0.2832	0.284434	0.118655	0.131295	0.142756			280.8	0.0978	0.0702	0.0552	0.1495	0.128	0.1137	0.1474	0.1333	0.1468	0.1316	0.1311	0.1413			280.8	0.0489	0.0045	0.0752	0.0817
640.6	0.17062	0.159703	0.167615	0.138504	0.140082	0.137803	0.356661	0.377443	0.41406	0.135687	0.153637	0.146698			640.6	0.145455	0.138465	0.139902	0.132143	0.134182	0.132981	0.264982	0.281528	0.28259	0.11757	0.130433	0.141751			281.2	0.0977	0.0704	0.0534	0.1513	0.1274	0.1136	0.1478	0.1345	0.1455	0.1318	0.132	0.1416			281.2	0.0491	0.0043	0.0742	0.0826
640.8	0.169624	0.158746	0.166651	0.137697	0.139298	0.137057	0.355171	0.375649	0.412404	0.134781	0.152743	0.145963			640.8	0.144646	0.13761	0.139112	0.131391	0.133392	0.132312	0.263736	0.280276	0.281297	0.116886	0.129708	0.140977			281.6	0.0988	0.0701	0.0542	0.1509	0.1278	0.1139	0.1496	0.1322	0.145	0.1317	0.1313	0.142			281.6	0.0496	0.0039	0.0751	0.0826
641	0.168417	0.157583	0.165419	0.136692	0.138337	0.136106	0.353348	0.373476	0.410368	0.133731	0.151691	0.145076			641	0.143632	0.136604	0.138203	0.130442	0.132447	0.13147	0.262255	0.278485	0.279626	0.115948	0.128888	0.140098			282	0.0982	0.0695	0.0538	0.1504	0.128	0.114	0.1493	0.1321	0.1463	0.133	0.1308	0.1424			282	0.0505	0.0034	0.075	0.0834
641.2	0.166914	0.156188	0.163881	0.135644	0.137169	0.134963	0.350998	0.370886	0.407759	0.13258	0.150328	0.143845			641.2	0.142436	0.135527	0.137009	0.129387	0.131348	0.130274	0.260641	0.276512	0.277492	0.114972	0.127848	0.138651			282.4	0.0981	0.0711	0.0551	0.1501	0.128	0.1143	0.1473	0.1341	0.1469	0.1319	0.132	0.1416			282.4	0.0492	0.0047	0.0759	0.0819
641.4	0.166185	0.155524	0.163177	0.135073	0.136568	0.134342	0.349878	0.369666	0.406413	0.131901	0.14961	0.143222			641.4	0.141827	0.134978	0.136533	0.128821	0.130705	0.129743	0.25992	0.275579	0.276531	0.11433	0.127143	0.138135			282.8	0.0987	0.0697	0.0554	0.1501	0.1279	0.1153	0.1492	0.132	0.1472	0.1325	0.131	0.1427			282.8	0.0488	0.0032	0.076	0.0837
641.6	0.164849	0.154235	0.161645	0.133979	0.135473	0.13314	0.347752	0.367258	0.403831	0.130806	0.148443	0.142136			641.6	0.140631	0.133878	0.135395	0.127754	0.129662	0.128705	0.25803	0.273681	0.274627	0.113439	0.126086	0.137109			283.2	0.0977	0.0716	0.0554	0.15	0.1276	0.1139	0.1488	0.133	0.1465	0.1316	0.1316	0.142			283.2	0.0502	0.0042	0.0765	0.083
641.8	0.163889	0.153371	0.160694	0.133228	0.134695	0.132399	0.346281	0.365736	0.402118	0.129926	0.147561	0.141282			641.8	0.139884	0.133126	0.134671	0.12705	0.128876	0.127982	0.25681	0.272477	0.273515	0.11263	0.125208	0.136322			283.6	0.0979	0.0707	0.0547	0.149	0.1273	0.1142	0.1478	0.133	0.1455	0.1316	0.1324	0.1417			283.6	0.0488	0.0046	0.075	0.082
642	0.162665	0.152353	0.15954	0.132277	0.133811	0.131469	0.344356	0.363432	0.399902	0.128749	0.14655	0.140212			642	0.138889	0.132147	0.133807	0.126139	0.128016	0.127028	0.255335	0.270764	0.272062	0.111748	0.124257	0.135287			284	0.098	0.071	0.0548	0.1502	0.1287	0.1149	0.1482	0.1327	0.1461	0.1328	0.1318	0.1416			284	0.0503	0.0039	0.0755	0.0821
642.2	0.161243	0.151042	0.158167	0.131115	0.132778	0.130259	0.342403	0.360989	0.397651	0.127755	0.145294	0.139213			642.2	0.137796	0.130933	0.132711	0.125112	0.126987	0.12607	0.253733	0.268895	0.270422	0.110692	0.123069	0.134503			284.4	0.0995	0.0706	0.0549	0.151	0.128	0.1157	0.1484	0.1339	0.1478	0.1329	0.1326	0.1432			284.4	0.0497	0.0054	0.0755	0.0842
642.4	0.160389	0.150139	0.157205	0.130317	0.131989	0.129561	0.340895	0.359424	0.396157	0.127196	0.144568	0.13838			642.4	0.136997	0.130234	0.132006	0.124373	0.126302	0.125429	0.252555	0.2677	0.269166	0.109964	0.122346	0.133694			284.8	0.0982	0.0703	0.0539	0.1503	0.1267	0.1136	0.1475	0.1324	0.1461	0.1321	0.1305	0.1412			284.8	0.0491	0.0033	0.0757	0.0829
642.6	0.159274	0.149009	0.156109	0.129365	0.131005	0.12865	0.339133	0.357313	0.39434	0.126265	0.14376	0.137535			642.6	0.135997	0.129289	0.131095	0.12348	0.125389	0.124615	0.251135	0.265984	0.267504	0.10892	0.121566	0.132917			285.2	0.099	0.0709	0.0535	0.1503	0.1287	0.114	0.1479	0.1333	0.1468	0.1329	0.1304	0.1411			285.2	0.0492	0.0045	0.0752	0.0833
642.8	0.157946	0.147795	0.154715	0.128318	0.129971	0.12769	0.336728	0.354592	0.391917	0.125027	0.14254	0.136423			642.8	0.134693	0.128213	0.130046	0.122456	0.124171	0.123545	0.248935	0.264105	0.265895	0.107995	0.120542	0.131609			285.6	0.0987	0.0718	0.0548	0.15	0.1277	0.114	0.1483	0.1347	0.146	0.1318	0.1328	0.1408			285.6	0.0497	0.0049	0.0759	0.0824
643	0.157194	0.147055	0.154061	0.127754	0.129414	0.127059	0.335759	0.353344	0.390688	0.124476	0.141877	0.135794			643	0.13411	0.127705	0.129518	0.121866	0.123672	0.122978	0.248189	0.263182	0.264963	0.107541	0.120198	0.130889			286	0.0985	0.071	0.0553	0.1501	0.1282	0.1147	0.1483	0.1329	0.1462	0.1315	0.1321	0.1413			286	0.0493	0.0047	0.076	0.0826
643.2	0.155756	0.145816	0.152837	0.12659	0.128313	0.125938	0.333441	0.350837	0.387964	0.123464	0.140846	0.134642			643.2	0.133	0.126616	0.128386	0.12073	0.122656	0.121972	0.24642	0.261329	0.263159	0.106706	0.119143	0.129923			286.4	0.0981	0.0704	0.0549	0.15	0.1287	0.1147	0.1468	0.133	0.146	0.1316	0.1327	0.1418			286.4	0.049	0.0048	0.075	0.0815
643.4	0.154942	0.144937	0.151977	0.125919	0.12759	0.125124	0.331886	0.349064	0.386229	0.122768	0.140065	0.133875			643.4	0.132219	0.125841	0.127656	0.120065	0.121969	0.121279	0.245361	0.260023	0.261958	0.106085	0.118551	0.129201			286.8	0.0985	0.0703	0.0549	0.1491	0.1283	0.1141	0.147	0.1331	0.1455	0.1312	0.1323	0.1413			286.8	0.0484	0.0046	0.0748	0.0824
643.6	0.153845	0.143864	0.150905	0.125098	0.126675	0.124209	0.330087	0.346923	0.38416	0.121831	0.139158	0.132875			643.6	0.131296	0.12492	0.126807	0.119158	0.121055	0.120472	0.243919	0.258505	0.260456	0.105425	0.117782	0.128279			287.2	0.0989	0.0708	0.0548	0.1508	0.1281	0.1154	0.1484	0.1331	0.1455	0.1325	0.1317	0.1418			287.2	0.0491	0.0044	0.0757	0.0833
643.8	0.152524	0.14265	0.149664	0.124132	0.125515	0.123179	0.327949	0.344384	0.381307	0.120767	0.138079	0.131485			643.8	0.130184	0.123873	0.125672	0.118132	0.120079	0.119445	0.242164	0.256446	0.258719	0.104485	0.116691	0.127005			287.6	0.0983	0.0705	0.0531	0.1501	0.1278	0.1134	0.1484	0.1329	0.1452	0.1318	0.1323	0.1402			287.6	0.0487	0.0044	0.0745	0.0825
644	0.151698	0.141865	0.148785	0.123427	0.124756	0.122452	0.326461	0.342864	0.379494	0.120222	0.137346	0.130721			644	0.129383	0.123137	0.124983	0.117523	0.11936	0.118703	0.241026	0.255284	0.257389	0.10376	0.115924	0.126318			288	0.0981	0.0717	0.0546	0.1482	0.1281	0.1148	0.147	0.134	0.1475	0.1307	0.1331	0.1426			288	0.0491	0.0045	0.0764	0.0819
644.2	0.150618	0.140837	0.147742	0.122537	0.123783	0.12157	0.324606	0.340926	0.377166	0.11943	0.136479	0.129789			644.2	0.128474	0.122249	0.124099	0.116717	0.118465	0.117811	0.239586	0.253927	0.255807	0.102941	0.115026	0.125445			288.4	0.0977	0.0712	0.0538	0.1496	0.1279	0.1138	0.1475	0.1328	0.1458	0.1313	0.1325	0.1397			288.4	0.05	0.0047	0.0749	0.0832
644.4	0.149398	0.139673	0.146524	0.121378	0.122648	0.120558	0.322542	0.338693	0.374435	0.118401	0.135286	0.128569			644.4	0.127417	0.121217	0.123068	0.115646	0.117407	0.116789	0.237849	0.252134	0.253882	0.102138	0.114113	0.124579			288.8	0.0992	0.0703	0.0548	0.15	0.1288	0.1149	0.1491	0.1333	0.1467	0.132	0.1315	0.1423			288.8	0.0502	0.0043	0.0752	0.0832
644.6	0.148718	0.139061	0.145837	0.120843	0.122105	0.120002	0.321228	0.337597	0.373209	0.117978	0.134734	0.128052			644.6	0.126926	0.120717	0.122506	0.115139	0.116953	0.116242	0.236761	0.251225	0.252916	0.101517	0.113645	0.123963			289.2	0.0986	0.071	0.0535	0.1501	0.1279	0.1141	0.1479	0.1331	0.145	0.1314	0.1329	0.141			289.2	0.0505	0.0038	0.0746	0.0838
644.8	0.147303	0.137865	0.144621	0.119789	0.12106	0.118947	0.318857	0.335104	0.370591	0.116925	0.133691	0.126821			644.8	0.1259	0.119541	0.121376	0.114145	0.116101	0.115199	0.234965	0.249212	0.251143	0.100493	0.112821	0.122736			289.6	0.0997	0.0711	0.0553	0.1505	0.1278	0.1157	0.1479	0.1324	0.1471	0.1316	0.1312	0.1415			289.6	0.0495	0.0036	0.0769	0.0844
645	0.146421	0.137082	0.143828	0.119067	0.120411	0.118292	0.317266	0.33349	0.368998	0.116329	0.133113	0.126141			645	0.125147	0.11888	0.120665	0.113542	0.115526	0.114568	0.233794	0.247935	0.249876	0.0999456	0.112353	0.122055			290	0.098	0.0727	0.0545	0.1492	0.1298	0.1154	0.1467	0.1345	0.1471	0.1319	0.1325	0.1416			290	0.0492	0.0053	0.0773	0.083
645.2	0.145387	0.136002	0.142793	0.1182	0.119545	0.117477	0.315539	0.33168	0.366812	0.115648	0.132231	0.125277			645.2	0.124246	0.118095	0.119771	0.112812	0.114782	0.113665	0.232342	0.24651	0.248296	0.0991673	0.111606	0.12134			290.4	0.0974	0.0707	0.0549	0.1489	0.1285	0.1156	0.1473	0.1329	0.1473	0.131	0.1321	0.1416			290.4	0.0482	0.0042	0.0759	0.0832
645.4	0.144189	0.134873	0.141578	0.117178	0.118481	0.116456	0.31326	0.329222	0.364078	0.114687	0.131089	0.124256			645.4	0.123124	0.117177	0.118824	0.111777	0.113817	0.112564	0.230638	0.244519	0.246227	0.0981724	0.110646	0.120254			290.8	0.0988	0.0712	0.0554	0.1509	0.129	0.1156	0.1477	0.1327	0.1465	0.131	0.1321	0.1417			290.8	0.0502	0.0053	0.0765	0.0831
645.6	0.143338	0.134128	0.14078	0.116509	0.117826	0.115716	0.311716	0.327573	0.362203	0.114023	0.130306	0.123619			645.6	0.122426	0.116521	0.118103	0.111176	0.113162	0.11191	0.229526	0.243327	0.245037	0.097631	0.109943	0.119678			291.2	0.0992	0.0711	0.0557	0.1515	0.1278	0.1146	0.1489	0.1334	0.1456	0.1319	0.1312	0.1405			291.2	0.0502	0.0049	0.0752	0.0839
645.8	0.142327	0.133145	0.139807	0.115727	0.117051	0.114889	0.309719	0.325667	0.359799	0.113307	0.12928	0.122744			645.8	0.121569	0.115695	0.117246	0.110404	0.112394	0.111135	0.22806	0.241926	0.243546	0.0970569	0.109105	0.118889			291.6	0.0983	0.0709	0.0547	0.1504	0.1279	0.1148	0.1469	0.132	0.1463	0.1311	0.131	0.1421			291.6	0.0491	0.0039	0.0763	0.082
646	0.141116	0.131948	0.138555	0.114715	0.115989	0.113903	0.307537	0.323358	0.357001	0.11247	0.128331	0.12146			646	0.120562	0.114632	0.116243	0.109461	0.111537	0.110253	0.226423	0.24029	0.24158	0.0961784	0.108509	0.118032			292	0.1003	0.072	0.0548	0.1506	0.1278	0.1147	0.1481	0.1338	0.1471	0.1318	0.131	0.1416			292	0.0498	0.0043	0.0767	0.0843
646.2	0.140557	0.131384	0.137959	0.11422	0.115502	0.113508	0.306378	0.322272	0.3557	0.111916	0.127871	0.121125			646.2	0.120002	0.114065	0.115758	0.109082	0.111072	0.109748	0.225559	0.239434	0.240719	0.0956922	0.108032	0.117706			292.4	0.0979	0.0715	0.0555	0.1507	0.1284	0.115	0.148	0.1328	0.1473	0.1309	0.1323	0.1425			292.4	0.0493	0.0041	0.0767	0.083
646.4	0.139336	0.130254	0.136658	0.113289	0.114559	0.112529	0.304252	0.320004	0.353158	0.110963	0.126681	0.120132			646.4	0.118953	0.113115	0.11473	0.108251	0.110075	0.108771	0.2238	0.237616	0.238981	0.0947116	0.107161	0.116729			292.8	0.0992	0.0722	0.0544	0.1508	0.1288	0.1139	0.1474	0.1343	0.1453	0.1318	0.1329	0.1412			292.8	0.0504	0.0048	0.0757	0.084
646.6	0.138513	0.129505	0.135788	0.112661	0.113929	0.111926	0.302697	0.318609	0.351451	0.110336	0.125838	0.11938			646.6	0.118281	0.112506	0.114039	0.107649	0.109379	0.108113	0.222505	0.236667	0.237749	0.0940149	0.106376	0.116029			293.2	0.0981	0.0715	0.0552	0.1509	0.128	0.1153	0.1472	0.1331	0.1473	0.1318	0.1324	0.1418			293.2	0.0507	0.0037	0.0763	0.0828
646.8	0.137533	0.128562	0.134798	0.111909	0.113155	0.111193	0.300528	0.316594	0.349036	0.109578	0.124949	0.11844			646.8	0.11745	0.111741	0.113115	0.106935	0.10857	0.107231	0.220911	0.235317	0.236192	0.0932345	0.105656	0.115182			293.6	0.0997	0.0727	0.0544	0.1502	0.1284	0.114	0.1487	0.1331	0.1461	0.1312	0.1319	0.1407			293.6	0.0507	0.005	0.0771	0.0846
647	0.136281	0.127519	0.133613	0.11089	0.112228	0.110253	0.298168	0.314219	0.346509	0.1085	0.123962	0.117321			647	0.116436	0.110776	0.112089	0.105884	0.107584	0.106307	0.219228	0.23354	0.234262	0.0924541	0.104818	0.113975			294	0.098	0.0716	0.0557	0.1499	0.1276	0.1149	0.1473	0.1333	0.1472	0.1314	0.1324	0.142			294	0.0501	0.0042	0.077	0.0832
647.2	0.135464	0.126825	0.13284	0.110247	0.111621	0.10966	0.296773	0.312743	0.34487	0.107945	0.123418	0.116707			647.2	0.1158	0.110209	0.111388	0.105259	0.107025	0.105693	0.218206	0.232298	0.233123	0.0919903	0.104297	0.113392			294.4	0.1007	0.0723	0.0549	0.1504	0.129	0.1145	0.1489	0.1332	0.1453	0.132	0.1314	0.1413			294.4	0.0507	0.0044	0.077	0.0846
647.4	0.13451	0.125919	0.13183	0.109487	0.110875	0.108954	0.294891	0.310947	0.342866	0.107217	0.122486	0.115921			647.4	0.114984	0.109514	0.110528	0.104483	0.106271	0.104964	0.216711	0.230751	0.231698	0.0913877	0.103617	0.112481			294.8	0.0985	0.0718	0.0557	0.1493	0.1289	0.1161	0.1472	0.1338	0.1473	0.1299	0.1325	0.1425			294.8	0.0497	0.0053	0.0768	0.083
647.6	0.133317	0.124737	0.130608	0.1086	0.109927	0.107915	0.292693	0.308484	0.340337	0.106333	0.121475	0.115101			647.6	0.113834	0.10859	0.109585	0.103691	0.105408	0.104088	0.215023	0.228973	0.229906	0.0904602	0.102628	0.111469			295.2	0.099	0.0729	0.0559	0.1506	0.1293	0.1157	0.1477	0.133	0.1461	0.1307	0.1323	0.1419			295.2	0.0498	0.0049	0.0776	0.0834
647.8	0.132591	0.124119	0.129937	0.10799	0.109276	0.107332	0.291184	0.306918	0.338607	0.105757	0.120881	0.114563			647.8	0.113178	0.108013	0.109023	0.10313	0.104801	0.103501	0.213971	0.227769	0.228721	0.0900802	0.102089	0.11103			295.6	0.0993	0.0717	0.0555	0.1503	0.1287	0.1158	0.1478	0.1332	0.1467	0.1315	0.1318	0.1423			295.6	0.0503	0.0051	0.0768	0.0834
648	0.1317	0.123306	0.129025	0.107191	0.108546	0.106711	0.28941	0.305074	0.336457	0.105045	0.119984	0.113678			648	0.112364	0.107221	0.108309	0.102418	0.10399	0.102823	0.212615	0.2263	0.227072	0.0894285	0.101231	0.11021			296	0.0995	0.0733	0.0553	0.1503	0.1286	0.1152	0.147	0.1335	0.145	0.1306	0.1317	0.141			296	0.0495	0.0049	0.0771	0.0837
648.2	0.130719	0.122273	0.127821	0.106345	0.107594	0.105773	0.287311	0.302724	0.333807	0.104041	0.118798	0.112801			648.2	0.111484	0.106362	0.107381	0.10152	0.103084	0.101941	0.210966	0.22436	0.225175	0.088599	0.100169	0.109417			296.4	0.0998	0.0733	0.0554	0.1502	0.1283	0.1156	0.1476	0.134	0.1461	0.1313	0.1311	0.1426			296.4	0.0502	0.0059	0.0775	0.0842
648.4	0.130166	0.121779	0.127235	0.105866	0.107106	0.105275	0.286046	0.301598	0.332767	0.103615	0.118213	0.112384			648.4	0.110959	0.10592	0.10681	0.101034	0.102532	0.101611	0.210116	0.223573	0.224524	0.0882272	0.0997328	0.109025			296.8	0.101	0.0717	0.0559	0.1516	0.128	0.1155	0.1478	0.1321	0.146	0.1326	0.1314	0.143			296.8	0.0504	0.0042	0.0773	0.085
648.6	0.128979	0.120787	0.126115	0.104985	0.106161	0.104412	0.283846	0.29931	0.330297	0.102677	0.117154	0.11152			648.6	0.11009	0.104973	0.105854	0.100229	0.101618	0.100749	0.208439	0.222054	0.223146	0.0874059	0.098886	0.108119			297.2	0.0998	0.0732	0.0559	0.1495	0.1303	0.115	0.1478	0.1327	0.1461	0.1321	0.132	0.1412			297.2	0.0504	0.0066	0.0774	0.0829
648.8	0.128306	0.120113	0.125339	0.104457	0.105584	0.103879	0.282482	0.297804	0.328638	0.102091	0.116401	0.111003			648.8	0.109506	0.104375	0.105273	0.0996145	0.101032	0.100197	0.207262	0.220922	0.221972	0.0868911	0.0983495	0.107388			297.6	0.0997	0.0729	0.0546	0.1503	0.1285	0.1166	0.148	0.1335	0.1469	0.1322	0.1318	0.1414			297.6	0.0498	0.005	0.0776	0.083
649	0.127422	0.119284	0.124389	0.103687	0.10484	0.103195	0.280747	0.295709	0.326408	0.101286	0.115547	0.110244			649	0.108739	0.103702	0.10453	0.0988687	0.100302	0.0994764	0.205824	0.219536	0.22039	0.0861679	0.09768	0.106313			298	0.1014	0.0729	0.0553	0.1511	0.1283	0.115	0.1488	0.1329	0.1466	0.1316	0.1314	0.1411			298	0.0511	0.0047	0.0774	0.0849
649.2	0.126345	0.11818	0.123355	0.102818	0.104002	0.102262	0.27846	0.293589	0.324019	0.100324	0.114587	0.109391			649.2	0.107879	0.102905	0.103614	0.0979959	0.0994616	0.0985092	0.204316	0.217854	0.218992	0.0854243	0.0966293	0.10546			298.4	0.0997	0.0726	0.0555	0.1505	0.1284	0.1159	0.1476	0.1329	0.1461	0.1317	0.1323	0.1421			298.4	0.0494	0.0052	0.0778	0.0823
649.4	0.125635	0.117576	0.122677	0.102258	0.10342	0.101648	0.276928	0.291971	0.322343	0.0998214	0.113936	0.108633			649.4	0.107239	0.102367	0.10302	0.0974106	0.0988679	0.0979657	0.203217	0.216785	0.217775	0.0850075	0.0960374	0.104793			298.8	0.1015	0.0722	0.0555	0.1508	0.1283	0.1158	0.1493	0.1327	0.1466	0.1321	0.1321	0.1409			298.8	0.0519	0.0057	0.0767	0.0851
649.6	0.124782	0.116825	0.121849	0.10161	0.102712	0.100951	0.275218	0.289901	0.320371	0.0990707	0.113162	0.107961			649.6	0.106502	0.10166	0.102336	0.0966936	0.0981531	0.0973348	0.202045	0.21536	0.21647	0.0843395	0.0952394	0.104139			299.2	0.1003	0.0725	0.0555	0.1503	0.1283	0.1156	0.1472	0.1327	0.1456	0.1322	0.1322	0.1421			299.2	0.0498	0.0054	0.077	0.0835
649.8	0.123695	0.115875	0.120809	0.100754	0.101841	0.100098	0.273032	0.287491	0.318124	0.0983221	0.112472	0.106993			649.8	0.105638	0.100794	0.101583	0.0958131	0.097401	0.0965561	0.200551	0.213547	0.214799	0.0837613	0.0946231	0.103342			299.6	0.0999	0.0732	0.056	0.1492	0.129	0.1161	0.148	0.1338	0.1466	0.1322	0.1321	0.1417			299.6	0.05	0.0047	0.0782	0.0841
650	0.122988	0.115182	0.120146	0.100184	0.101305	0.0995728	0.271768	0.286142	0.31666	0.0978346	0.111714	0.106423			650	0.105056	0.100226	0.101037	0.0953235	0.0968397	0.0959893	0.199658	0.21238	0.213654	0.0831546	0.093927	0.102859			300	0.1004	0.0717	0.0562	0.1514	0.1274	0.1156	0.1479	0.1327	0.1476	0.132	0.1313	0.1424			300	0.0501	0.0047	0.0771	0.0841
																														300.4	0.0988	0.0723	0.056	0.1494	0.1279	0.1168	0.1472	0.1322	0.1471	0.1309	0.1317	0.1425			300.4	0.0497	0.0044	0.0786	0.0832
																														300.8	0.0999	0.0725	0.0553	0.151	0.1283	0.1157	0.148	0.1323	0.1459	0.1318	0.1319	0.1426			300.8	0.0491	0.0054	0.0777	0.0832
																														301.2	0.1003	0.0727	0.0576	0.1504	0.1283	0.1165	0.1483	0.1317	0.1474	0.1317	0.1314	0.1431			301.2	0.0519	0.0049	0.0786	0.085
																														301.6	0.1006	0.0732	0.056	0.1501	0.1293	0.1154	0.1471	0.1333	0.1454	0.1322	0.1308	0.1411			301.6	0.0503	0.0048	0.0775	0.0845
																														302	0.1	0.0725	0.056	0.1507	0.1276	0.1164	0.1485	0.133	0.1461	0.1314	0.1314	0.1418			302	0.0501	0.0047	0.0772	0.0839
																														302.4	0.0997	0.0743	0.0567	0.1497	0.1287	0.1165	0.1473	0.134	0.1471	0.1313	0.1314	0.142			302.4	0.0503	0.0048	0.0792	0.0833
																														302.8	0.0994	0.0727	0.0549	0.1504	0.129	0.1166	0.1484	0.1343	0.1465	0.1305	0.1338	0.1415			302.8	0.0514	0.0063	0.077	0.0842
																														303.2	0.1012	0.0736	0.0569	0.1505	0.1287	0.1174	0.148	0.1329	0.1458	0.1325	0.1326	0.1414			303.2	0.0508	0.0057	0.0786	0.0845
																														303.6	0.0999	0.0728	0.0559	0.1502	0.1291	0.1152	0.1482	0.133	0.146	0.1322	0.1315	0.1418			303.6	0.0505	0.0052	0.0772	0.0844
																														304	0.1017	0.073	0.056	0.1504	0.1289	0.116	0.1489	0.1326	0.1467	0.1321	0.1311	0.1416			304	0.0516	0.0055	0.0775	0.0846
																														304.4	0.0994	0.0739	0.0555	0.1498	0.1296	0.1156	0.1475	0.1341	0.1458	0.1317	0.1323	0.1417			304.4	0.0498	0.0058	0.0779	0.0839
																														304.8	0.0999	0.0726	0.0564	0.1498	0.1282	0.1166	0.1461	0.1326	0.1463	0.1315	0.1312	0.1414			304.8	0.0498	0.0052	0.0779	0.0833
																														305.2	0.1006	0.0739	0.0564	0.1509	0.1288	0.1169	0.1475	0.1323	0.1472	0.1316	0.1322	0.1417			305.2	0.0509	0.0051	0.0788	0.0844
																														305.6	0.0999	0.0731	0.057	0.1498	0.1288	0.1172	0.1473	0.1327	0.1472	0.1312	0.1327	0.1413			305.6	0.0499	0.0049	0.0786	0.0833
																														306	0.1006	0.0736	0.056	0.1508	0.1288	0.1163	0.1476	0.1328	0.1464	0.1319	0.1315	0.1424			306	0.05	0.0042	0.0779	0.0855
																														306.4	0.1014	0.0728	0.0567	0.1509	0.1294	0.1166	0.1478	0.133	0.1449	0.1324	0.1327	0.1414			306.4	0.051	0.0052	0.0771	0.0845
																														306.8	0.1014	0.0734	0.0559	0.1514	0.1283	0.1163	0.1485	0.1337	0.146	0.1327	0.1311	0.1425			306.8	0.0518	0.005	0.078	0.0851
																														307.2	0.1	0.0741	0.057	0.1506	0.1293	0.1169	0.1477	0.133	0.1466	0.1319	0.1327	0.1422			307.2	0.0503	0.0056	0.0793	0.084
																														307.6	0.101	0.074	0.0567	0.152	0.1287	0.1168	0.1486	0.1329	0.1467	0.1334	0.1318	0.1419			307.6	0.0517	0.0042	0.079	0.0847
																														308	0.101	0.0741	0.0555	0.1509	0.1304	0.1159	0.1472	0.1325	0.1458	0.1315	0.1332	0.1412			308	0.0506	0.0059	0.0778	0.0832
																														308.4	0.1015	0.0737	0.0559	0.1511	0.1286	0.116	0.1478	0.1332	0.147	0.1323	0.1315	0.1417			308.4	0.0512	0.0046	0.0776	0.0851
																														308.8	0.1009	0.0734	0.0562	0.1504	0.1282	0.1163	0.1478	0.1324	0.1459	0.1314	0.1312	0.1425			308.8	0.0506	0.0061	0.078	0.085
																														309.2	0.1025	0.0743	0.0573	0.1508	0.13	0.1169	0.15	0.1341	0.146	0.1328	0.1321	0.1421			309.2	0.052	0.0063	0.079	0.0857
																														309.6	0.1008	0.0741	0.0567	0.1503	0.1295	0.1159	0.1484	0.1331	0.1465	0.1322	0.1333	0.141			309.6	0.0506	0.0062	0.0783	0.0842
																														310	0.1002	0.0725	0.0579	0.151	0.1287	0.1168	0.149	0.1315	0.1469	0.1323	0.1324	0.1427			310	0.0508	0.0062	0.078	0.0845
																														310.4	0.1015	0.0739	0.0563	0.1514	0.1283	0.1157	0.1478	0.1346	0.1458	0.1318	0.1318	0.1412			310.4	0.0506	0.0059	0.0779	0.084
																														310.8	0.1008	0.0735	0.0574	0.1504	0.1283	0.1174	0.1475	0.1331	0.1465	0.131	0.1319	0.1436			310.8	0.0498	0.0053	0.0794	0.0846
																														311.2	0.102	0.0743	0.056	0.1523	0.1292	0.116	0.1486	0.1327	0.1466	0.1317	0.1314	0.1417			311.2	0.0513	0.0061	0.0786	0.0858
																														311.6	0.101	0.0733	0.0564	0.1508	0.1287	0.1162	0.1481	0.1327	0.1454	0.1321	0.1321	0.1418			311.6	0.0512	0.0058	0.0778	0.0843
																														312	0.1	0.0748	0.0572	0.1499	0.1278	0.1173	0.1469	0.1322	0.1471	0.132	0.1314	0.1411			312	0.0511	0.006	0.0801	0.0849
																														312.4	0.1006	0.0732	0.0572	0.151	0.1285	0.1177	0.1473	0.1332	0.1469	0.1323	0.1314	0.1419			312.4	0.0514	0.0048	0.0785	0.0838
																														312.8	0.1009	0.0742	0.057	0.1511	0.1284	0.1169	0.1471	0.1332	0.1463	0.1316	0.1333	0.1415			312.8	0.0502	0.0059	0.0785	0.0848
																														313.2	0.1009	0.0741	0.0566	0.1507	0.129	0.1165	0.147	0.1334	0.1468	0.1323	0.1327	0.1412			313.2	0.0504	0.0056	0.0781	0.0838
																														313.6	0.1019	0.0755	0.056	0.1515	0.1294	0.115	0.1474	0.1336	0.1468	0.1313	0.1317	0.1417			313.6	0.0503	0.0065	0.0793	0.0856
																														314	0.1008	0.0737	0.0567	0.1504	0.1278	0.1163	0.1478	0.1328	0.1465	0.131	0.1322	0.1412			314	0.0509	0.005	0.0782	0.0844
																														314.4	0.1007	0.074	0.0579	0.1504	0.1297	0.1173	0.1469	0.1321	0.1462	0.1319	0.1315	0.1422			314.4	0.0513	0.006	0.0792	0.0842
																														314.8	0.101	0.074	0.0563	0.1504	0.1282	0.1162	0.1471	0.1329	0.1462	0.1322	0.1323	0.1408			314.8	0.0516	0.0057	0.0782	0.0844
																														315.2	0.1013	0.0743	0.0557	0.1507	0.1294	0.1163	0.1488	0.1343	0.1463	0.1331	0.1324	0.1411			315.2	0.0514	0.0068	0.0776	0.0842
																														315.6	0.1015	0.0742	0.0564	0.1497	0.1276	0.1179	0.1473	0.1321	0.1462	0.1311	0.1317	0.1417			315.6	0.0519	0.0056	0.0796	0.0834
																														316	0.1014	0.0755	0.057	0.1509	0.129	0.1163	0.1476	0.133	0.1456	0.1317	0.1325	0.1413			316	0.0514	0.0055	0.0789	0.0847
																														316.4	0.1027	0.074	0.0567	0.1517	0.1278	0.1171	0.1483	0.132	0.1454	0.1328	0.1317	0.1415			316.4	0.0515	0.0047	0.0788	0.0849
																														316.8	0.1008	0.0735	0.0572	0.1499	0.1278	0.1168	0.147	0.1322	0.1461	0.1314	0.1304	0.141			316.8	0.0516	0.0051	0.0787	0.0846
																														317.2	0.1013	0.0749	0.0578	0.1508	0.1292	0.1166	0.1469	0.1348	0.1471	0.1315	0.1326	0.1427			317.2	0.0509	0.0061	0.0792	0.0838
																														317.6	0.1015	0.0737	0.057	0.1514	0.1284	0.1171	0.1486	0.1323	0.1455	0.1323	0.1316	0.1416			317.6	0.0515	0.0063	0.0782	0.0851
																														318	0.1021	0.0748	0.0576	0.1506	0.1283	0.1173	0.1469	0.1333	0.1462	0.1325	0.1329	0.1427			318	0.0507	0.0055	0.0796	0.0838
																														318.4	0.102	0.0753	0.0571	0.1511	0.1289	0.1169	0.1479	0.1332	0.1463	0.1317	0.1329	0.1416			318.4	0.0518	0.0062	0.0794	0.0853
																														318.8	0.1024	0.0753	0.0572	0.1501	0.1293	0.1161	0.148	0.1326	0.1453	0.1324	0.1315	0.1408			318.8	0.0516	0.0067	0.0792	0.0845
																														319.2	0.102	0.0733	0.0579	0.1493	0.1271	0.1178	0.1473	0.1323	0.1467	0.1317	0.1316	0.1422			319.2	0.0509	0.0056	0.0795	0.0843
																														319.6	0.1021	0.0757	0.0579	0.1499	0.1291	0.1168	0.1473	0.1347	0.1459	0.1325	0.1336	0.1414			319.6	0.0511	0.0069	0.0793	0.0852
																														320	0.1028	0.0752	0.0576	0.1506	0.1292	0.1171	0.1492	0.1339	0.1462	0.132	0.1326	0.1412			320	0.0523	0.007	0.0796	0.086
																														320.4	0.103	0.0756	0.0582	0.1515	0.1285	0.1174	0.1483	0.134	0.1461	0.1322	0.1325	0.142			320.4	0.0516	0.0057	0.0801	0.0845
																														320.8	0.1027	0.0759	0.0571	0.1518	0.13	0.1195	0.1485	0.1331	0.147	0.1325	0.1331	0.1432			320.8	0.0519	0.0064	0.0808	0.0855
																														321.2	0.1018	0.0746	0.0565	0.1502	0.1278	0.1165	0.1489	0.1326	0.1452	0.1325	0.131	0.1414			321.2	0.0521	0.0057	0.0793	0.0848
																														321.6	0.1016	0.0756	0.0582	0.1503	0.1288	0.1178	0.1477	0.1329	0.1465	0.1315	0.1324	0.1429			321.6	0.0512	0.0069	0.0802	0.0855
																														322	0.1015	0.0743	0.0582	0.151	0.1274	0.1173	0.1465	0.1336	0.1474	0.1325	0.1319	0.1415			322	0.051	0.0064	0.0795	0.0853
																														322.4	0.1035	0.0746	0.0582	0.1513	0.129	0.1178	0.1484	0.1325	0.1464	0.1328	0.1323	0.1425			322.4	0.0527	0.0055	0.08	0.087
																														322.8	0.1016	0.076	0.0567	0.1518	0.1286	0.1168	0.1485	0.133	0.146	0.1317	0.1325	0.1411			322.8	0.0521	0.0062	0.0796	0.0846
																														323.2	0.1028	0.0749	0.0568	0.1509	0.1283	0.1175	0.1488	0.1318	0.1446	0.132	0.1316	0.1413			323.2	0.0518	0.0063	0.0794	0.0863
																														323.6	0.1009	0.0753	0.0576	0.1503	0.1283	0.1178	0.148	0.1332	0.1459	0.1312	0.1327	0.1421			323.6	0.0506	0.0061	0.08	0.0848
																														324	0.1023	0.0747	0.0582	0.1505	0.1286	0.1175	0.1474	0.1324	0.1458	0.1319	0.1325	0.1418			324	0.0521	0.0064	0.0794	0.0852
																														324.4	0.1018	0.0747	0.0583	0.1502	0.129	0.1182	0.1477	0.1325	0.1466	0.132	0.1319	0.1418			324.4	0.0516	0.007	0.0799	0.0849
																														324.8	0.1025	0.0753	0.0583	0.1514	0.1289	0.1175	0.1481	0.1323	0.1467	0.1308	0.1316	0.1415			324.8	0.0525	0.0062	0.0801	0.085
																														325.2	0.1021	0.0755	0.0578	0.1495	0.1292	0.1175	0.1482	0.1324	0.146	0.1316	0.1324	0.1413			325.2	0.0514	0.0067	0.0797	0.0856
																														325.6	0.1025	0.0748	0.0586	0.1516	0.1275	0.1184	0.1493	0.1329	0.1455	0.1331	0.1308	0.1417			325.6	0.0518	0.0069	0.0794	0.0864
																														326	0.1025	0.077	0.0571	0.152	0.1299	0.117	0.1483	0.1336	0.1448	0.1313	0.1325	0.1414			326	0.052	0.0075	0.0802	0.0861
																														326.4	0.1024	0.0762	0.0576	0.15	0.1295	0.1173	0.1472	0.1334	0.1456	0.1317	0.1325	0.1407			326.4	0.0515	0.0069	0.0792	0.0852
																														326.8	0.102	0.0761	0.0564	0.1507	0.1283	0.1171	0.1477	0.1331	0.1454	0.1319	0.1327	0.1422			326.8	0.0516	0.0063	0.0802	0.0853
																														327.2	0.1015	0.0749	0.0575	0.15	0.1294	0.118	0.1466	0.1329	0.1463	0.1318	0.1313	0.1421			327.2	0.0518	0.0061	0.0791	0.0852
																														327.6	0.1033	0.0758	0.0574	0.1501	0.1279	0.1185	0.1486	0.1324	0.1456	0.1331	0.1322	0.1414			327.6	0.0522	0.0069	0.0805	0.0864
																														328	0.1021	0.0758	0.0579	0.1503	0.1282	0.1189	0.1481	0.1323	0.1462	0.1311	0.1324	0.1427			328	0.0515	0.006	0.0808	0.0859
																														328.4	0.1037	0.0747	0.0572	0.1517	0.128	0.1181	0.15	0.1322	0.1459	0.1326	0.1315	0.1421			328.4	0.0524	0.0057	0.0796	0.0865
																														328.8	0.1024	0.0761	0.0582	0.1509	0.1288	0.1172	0.1469	0.1343	0.1467	0.1304	0.1321	0.1417			328.8	0.0522	0.007	0.0805	0.0849
																														329.2	0.1037	0.0754	0.0578	0.1511	0.1287	0.1189	0.1478	0.1321	0.1458	0.1336	0.1319	0.1416			329.2	0.0518	0.0066	0.08	0.0854
																														329.6	0.1017	0.0767	0.059	0.1501	0.1301	0.1183	0.1469	0.1341	0.147	0.1316	0.1334	0.142			329.6	0.0514	0.0081	0.0805	0.0845
																														330	0.1038	0.0756	0.0592	0.1507	0.1279	0.1195	0.1482	0.1335	0.1461	0.1318	0.1319	0.142			330	0.0525	0.0065	0.0807	0.0866
																														330.4	0.1037	0.0747	0.0583	0.1512	0.1273	0.1178	0.148	0.1323	0.1452	0.1319	0.1315	0.1421			330.4	0.052	0.0051	0.08	0.086
																														330.8	0.1025	0.0755	0.0578	0.1509	0.1286	0.1182	0.1486	0.1324	0.1457	0.1313	0.1327	0.1409			330.8	0.0531	0.0058	0.08	0.0863
																														331.2	0.1028	0.0764	0.0583	0.1501	0.1288	0.1188	0.1482	0.1327	0.1461	0.1313	0.1319	0.1425			331.2	0.0515	0.0061	0.0811	0.0857
																														331.6	0.1024	0.0767	0.058	0.1506	0.1299	0.1178	0.1474	0.1329	0.1465	0.132	0.1324	0.1417			331.6	0.051	0.0083	0.0805	0.0862
																														332	0.1038	0.0751	0.0584	0.1513	0.1276	0.1186	0.1484	0.1333	0.147	0.1328	0.1314	0.1413			332	0.0524	0.0065	0.0804	0.0855
																														332.4	0.1035	0.0761	0.0589	0.1516	0.1285	0.1185	0.1477	0.1326	0.1449	0.1324	0.1316	0.1424			332.4	0.0526	0.0063	0.0809	0.0861
																														332.8	0.1047	0.0765	0.0583	0.1515	0.1291	0.1179	0.1482	0.1336	0.1456	0.1324	0.133	0.1422			332.8	0.0529	0.0075	0.08	0.0864
																														333.2	0.103	0.0767	0.0579	0.1515	0.1298	0.1186	0.1476	0.1331	0.1457	0.1313	0.1316	0.1418			333.2	0.0515	0.0069	0.0804	0.0849
																														333.6	0.1042	0.0761	0.0588	0.1504	0.1288	0.1192	0.149	0.1319	0.1468	0.132	0.1306	0.1426			333.6	0.0528	0.0067	0.0812	0.0866
																														334	0.1027	0.0766	0.0587	0.1508	0.1284	0.1177	0.1485	0.1324	0.1469	0.1321	0.1324	0.1421			334	0.0517	0.0074	0.081	0.0867
																														334.4	0.1036	0.0768	0.059	0.1514	0.1293	0.1184	0.149	0.1325	0.147	0.1327	0.1319	0.141			334.4	0.0522	0.0075	0.081	0.086
																														334.8	0.1029	0.0766	0.0576	0.1518	0.1285	0.1186	0.1478	0.1337	0.1467	0.1327	0.1323	0.1416			334.8	0.0525	0.007	0.0804	0.0857
																														335.2	0.1043	0.0769	0.0582	0.1515	0.1293	0.1191	0.1483	0.1329	0.1458	0.1323	0.1321	0.1406			335.2	0.0528	0.0069	0.0807	0.0864
																														335.6	0.104	0.0775	0.058	0.1505	0.1296	0.1179	0.1483	0.1318	0.1442	0.132	0.1318	0.1422			335.6	0.052	0.0063	0.0814	0.0858
																														336	0.104	0.0777	0.0586	0.1519	0.1293	0.1185	0.1486	0.1335	0.1457	0.1313	0.1322	0.1417			336	0.0516	0.0074	0.0815	0.0868
																														336.4	0.1033	0.0772	0.0591	0.1503	0.1288	0.1194	0.1482	0.1317	0.1461	0.1314	0.1322	0.1434			336.4	0.0524	0.007	0.0823	0.0861
																														336.8	0.1021	0.0771	0.0598	0.151	0.1303	0.1186	0.1482	0.1344	0.1474	0.132	0.1327	0.1419			336.8	0.0516	0.0074	0.0814	0.0864
																														337.2	0.1047	0.0761	0.0591	0.1514	0.1286	0.1186	0.1481	0.1324	0.1467	0.1327	0.132	0.1421			337.2	0.0533	0.0062	0.081	0.0873
																														337.6	0.1039	0.077	0.0586	0.1517	0.1297	0.1175	0.1487	0.1335	0.1448	0.1322	0.1318	0.1411			337.6	0.0522	0.0078	0.0808	0.0879
																														338	0.1039	0.0767	0.0592	0.1519	0.1279	0.1185	0.1473	0.1337	0.146	0.1328	0.1328	0.1412			338	0.0519	0.0071	0.0808	0.0862
																														338.4	0.104	0.0766	0.0595	0.1527	0.129	0.1187	0.1487	0.1338	0.146	0.1325	0.1312	0.142			338.4	0.0526	0.0075	0.0809	0.0871
																														338.8	0.1041	0.0775	0.0585	0.1524	0.1288	0.1192	0.1482	0.1332	0.1465	0.1333	0.1322	0.1408			338.8	0.0526	0.0073	0.0812	0.0867
																														339.2	0.1028	0.076	0.0586	0.1506	0.1284	0.118	0.1484	0.1324	0.1462	0.1325	0.1309	0.1408			339.2	0.0535	0.0058	0.0814	0.0865
																														339.6	0.1055	0.0782	0.0586	0.1514	0.1299	0.1189	0.1482	0.1331	0.1455	0.1325	0.1322	0.1401			339.6	0.0528	0.0079	0.0823	0.0869
																														340	0.1042	0.0773	0.0583	0.1502	0.1291	0.1175	0.1483	0.1332	0.1453	0.132	0.1315	0.1407			340	0.0526	0.0068	0.0811	0.087
																														340.4	0.1039	0.078	0.0599	0.1516	0.1278	0.119	0.1476	0.134	0.1464	0.1319	0.1326	0.142			340.4	0.0522	0.0079	0.0822	0.0868
																														340.8	0.1031	0.0771	0.0582	0.1506	0.1279	0.119	0.1471	0.1327	0.1459	0.1323	0.1321	0.1421			340.8	0.0521	0.006	0.0816	0.0868
																														341.2	0.1041	0.0774	0.0602	0.1514	0.1292	0.119	0.1474	0.1322	0.1466	0.1325	0.1326	0.1429			341.2	0.0529	0.0076	0.0821	0.086
																														341.6	0.1033	0.0772	0.0583	0.1512	0.1295	0.1185	0.148	0.1325	0.1455	0.1332	0.1311	0.1413			341.6	0.0519	0.0072	0.0813	0.0871
																														342	0.1039	0.0772	0.0583	0.151	0.1278	0.1184	0.1484	0.1325	0.1468	0.1321	0.1315	0.1419			342	0.0535	0.0069	0.0823	0.086
																														342.4	0.1051	0.0776	0.0585	0.1519	0.1289	0.1185	0.1488	0.1331	0.146	0.1342	0.1316	0.1402			342.4	0.0533	0.0075	0.0816	0.0874
																														342.8	0.1034	0.0781	0.0597	0.1501	0.1293	0.1196	0.1482	0.1332	0.1455	0.1317	0.1322	0.1416			342.8	0.0534	0.0086	0.082	0.0857
																														343.2	0.1047	0.0779	0.0594	0.1508	0.1306	0.1205	0.1481	0.1328	0.1456	0.1312	0.1332	0.1418			343.2	0.0524	0.0073	0.0821	0.0867
																														343.6	0.1033	0.077	0.0587	0.1506	0.1297	0.1192	0.1472	0.133	0.1456	0.131	0.1328	0.142			343.6	0.0522	0.0064	0.0811	0.0853
																														344	0.1042	0.0776	0.06	0.1517	0.1297	0.1194	0.1473	0.1339	0.1454	0.1319	0.1333	0.142			344	0.0525	0.0077	0.0819	0.0861
																														344.4	0.1048	0.0771	0.0582	0.1517	0.1282	0.1184	0.1481	0.1323	0.145	0.1324	0.1315	0.1413			344.4	0.0542	0.0059	0.0817	0.0874
																														344.8	0.1053	0.0771	0.0603	0.1515	0.1282	0.1196	0.1486	0.1323	0.1456	0.1319	0.132	0.1419			344.8	0.0537	0.0074	0.0819	0.0872
																														345.2	0.1044	0.0773	0.0588	0.152	0.1294	0.1188	0.1486	0.1328	0.1451	0.132	0.1319	0.1407			345.2	0.0536	0.0065	0.0812	0.0862
																														345.6	0.105	0.0762	0.0594	0.1514	0.1281	0.12	0.1483	0.1323	0.1465	0.1316	0.1315	0.1431			345.6	0.0542	0.007	0.0818	0.0877
																														346	0.1044	0.0779	0.0588	0.1518	0.1303	0.1196	0.1483	0.1342	0.1453	0.1318	0.1323	0.1417			346	0.0536	0.0076	0.0815	0.0868
																														346.4	0.104	0.0773	0.0594	0.1526	0.1286	0.1193	0.1474	0.132	0.1467	0.1323	0.1309	0.142			346.4	0.0525	0.0075	0.0821	0.0867
																														346.8	0.1057	0.0787	0.0598	0.1504	0.1288	0.1197	0.1488	0.1335	0.1453	0.1322	0.131	0.1413			346.8	0.0528	0.0085	0.0828	0.0873
																														347.2	0.1057	0.0776	0.0596	0.1523	0.1284	0.1199	0.1487	0.133	0.1463	0.1333	0.1323	0.1426			347.2	0.0534	0.0068	0.0825	0.0873
																														347.6	0.1049	0.0781	0.0586	0.1521	0.1303	0.1185	0.149	0.1338	0.1451	0.1332	0.1325	0.1416			347.6	0.0536	0.0082	0.0815	0.088
																														348	0.1047	0.0773	0.0601	0.1511	0.1286	0.1196	0.1489	0.133	0.1465	0.132	0.1314	0.142			348	0.0534	0.0069	0.0823	0.0882
																														348.4	0.1047	0.0779	0.0591	0.1513	0.1296	0.1196	0.1476	0.1329	0.1463	0.1323	0.1329	0.142			348.4	0.0546	0.0081	0.082	0.087
																														348.8	0.104	0.0784	0.0596	0.1505	0.1294	0.1192	0.1479	0.1318	0.1451	0.1297	0.1322	0.1416			348.8	0.0522	0.0071	0.0824	0.0871
																														349.2	0.1048	0.0789	0.0598	0.1516	0.1285	0.1195	0.1474	0.1334	0.1451	0.1332	0.1323	0.1407			349.2	0.0536	0.0086	0.0829	0.0875
																														349.6	0.1057	0.079	0.0573	0.1513	0.1306	0.119	0.1478	0.1328	0.1452	0.1333	0.1316	0.1399			349.6	0.0534	0.0079	0.0819	0.087
																														350	0.1051	0.0773	0.0593	0.1511	0.1288	0.1181	0.1474	0.1339	0.1467	0.1322	0.1313	0.142			350	0.0533	0.0075	0.0815	0.0869
																														350.4	0.1042	0.0786	0.0593	0.1517	0.1291	0.1191	0.1482	0.1321	0.1451	0.1312	0.1313	0.1424			350.4	0.054	0.0086	0.0825	0.0872
																														350.8	0.105	0.0774	0.0605	0.1513	0.1289	0.1202	0.1472	0.1322	0.1457	0.1323	0.1315	0.1414			350.8	0.0533	0.008	0.0822	0.0868
																														351.2	0.1052	0.0785	0.0591	0.1519	0.1283	0.1189	0.1489	0.133	0.1462	0.1317	0.1313	0.1411			351.2	0.0532	0.0066	0.0828	0.0868
																														351.6	0.1062	0.0786	0.0596	0.1521	0.1298	0.1206	0.1478	0.1338	0.1468	0.1317	0.1324	0.1419			351.6	0.0525	0.008	0.0832	0.0866
																														352	0.1055	0.0779	0.0589	0.1511	0.1278	0.1185	0.1481	0.133	0.1457	0.1312	0.1312	0.1412			352	0.0528	0.0084	0.0815	0.0869
																														352.4	0.105	0.078	0.0594	0.1523	0.1291	0.1202	0.1479	0.1327	0.1457	0.1327	0.1315	0.1414			352.4	0.0542	0.0086	0.0824	0.087
																														352.8	0.105	0.0785	0.0592	0.1517	0.1277	0.1191	0.1488	0.1316	0.1449	0.1331	0.131	0.1412			352.8	0.0542	0.0075	0.0828	0.0881
																														353.2	0.1062	0.0784	0.0604	0.1525	0.1286	0.1201	0.1481	0.1337	0.1462	0.132	0.1323	0.1432			353.2	0.0547	0.0079	0.0833	0.0883
																														353.6	0.1046	0.079	0.0587	0.1507	0.1289	0.1198	0.1483	0.1334	0.1456	0.1316	0.1332	0.1409			353.6	0.0532	0.0081	0.0821	0.0862
																														354	0.1057	0.0779	0.0591	0.1518	0.1285	0.1189	0.1484	0.1334	0.146	0.1327	0.1322	0.1414			354	0.054	0.0072	0.0823	0.0873
																														354.4	0.1061	0.0787	0.0593	0.1517	0.1285	0.1196	0.149	0.1338	0.1453	0.1327	0.1325	0.1412			354.4	0.0543	0.0091	0.082	0.0879
																														354.8	0.1057	0.0783	0.0595	0.1517	0.1289	0.1199	0.1487	0.1318	0.1465	0.1325	0.1317	0.1419			354.8	0.0544	0.0069	0.0834	0.0888
																														355.2	0.1048	0.0788	0.0609	0.1522	0.1296	0.1205	0.1489	0.1324	0.1464	0.1319	0.1332	0.1434			355.2	0.0534	0.0083	0.0833	0.087
																														355.6	0.1048	0.0783	0.0603	0.1523	0.1278	0.1206	0.1482	0.1315	0.1459	0.1316	0.1313	0.1416			355.6	0.0538	0.0062	0.0835	0.0874
																														356	0.1055	0.0787	0.0602	0.1505	0.1292	0.1204	0.1474	0.1335	0.1467	0.1315	0.1319	0.1423			356	0.0533	0.0083	0.083	0.0865
																														356.4	0.1063	0.0785	0.0604	0.1525	0.1281	0.1201	0.1483	0.1322	0.146	0.1329	0.1312	0.1416			356.4	0.0546	0.0076	0.0831	0.0886
																														356.8	0.1045	0.0788	0.0596	0.151	0.1294	0.1199	0.1479	0.1328	0.1451	0.132	0.1324	0.1405			356.8	0.053	0.0089	0.0825	0.0866
																														357.2	0.1055	0.0795	0.0603	0.1523	0.1283	0.1201	0.1487	0.1334	0.1465	0.1324	0.1333	0.1424			357.2	0.0542	0.0077	0.0837	0.0875
																														357.6	0.1054	0.0787	0.059	0.152	0.1293	0.1196	0.1492	0.1319	0.1462	0.1337	0.1328	0.1413			357.6	0.0535	0.0083	0.0828	0.0876
																														358	0.1047	0.0782	0.0604	0.1496	0.1285	0.121	0.1468	0.1334	0.145	0.1312	0.132	0.1416			358	0.0533	0.0072	0.0825	0.0859
																														358.4	0.1056	0.079	0.0609	0.1509	0.1292	0.1207	0.1472	0.134	0.1462	0.1316	0.1316	0.1417			358.4	0.0547	0.0083	0.0835	0.087
																														358.8	0.1049	0.0804	0.0604	0.1505	0.1294	0.1202	0.1487	0.1332	0.1471	0.1332	0.1318	0.1424			358.8	0.0538	0.01	0.084	0.088
																														359.2	0.1044	0.0792	0.0609	0.1519	0.1277	0.1203	0.1474	0.1331	0.1459	0.1309	0.1317	0.1414			359.2	0.0546	0.0076	0.0838	0.0867
																														359.6	0.1062	0.0789	0.0602	0.1524	0.1285	0.1188	0.149	0.1319	0.1449	0.1326	0.1321	0.1411			359.6	0.0539	0.0081	0.0827	0.0888
																														360	0.1063	0.0784	0.0597	0.1522	0.1292	0.1198	0.1485	0.1328	0.1452	0.1336	0.132	0.1421			360	0.0544	0.0074	0.0827	0.0887
																														360.4	0.1062	0.0786	0.0603	0.1514	0.1299	0.12	0.1491	0.1335	0.1453	0.1327	0.1319	0.1422			360.4	0.0521	0.0082	0.0826	0.0885
																														360.8	0.1058	0.0789	0.0608	0.1504	0.1284	0.1211	0.1486	0.1318	0.1467	0.1317	0.1313	0.1419			360.8	0.0547	0.0072	0.0839	0.088
																														361.2	0.1056	0.0798	0.0603	0.153	0.1298	0.1201	0.1501	0.1332	0.1463	0.1329	0.1332	0.1419			361.2	0.0547	0.0084	0.0831	0.0887
																														361.6	0.1061	0.0792	0.0602	0.1522	0.1276	0.1203	0.1491	0.1327	0.1462	0.1332	0.1316	0.1418			361.6	0.055	0.0078	0.0844	0.0879
																														362	0.1058	0.0799	0.0604	0.151	0.1291	0.1196	0.1472	0.1328	0.145	0.1317	0.1323	0.1411			362	0.0534	0.0081	0.0837	0.087
																														362.4	0.1054	0.0802	0.0609	0.1515	0.1292	0.121	0.1486	0.1335	0.145	0.1317	0.1312	0.1421			362.4	0.0534	0.0088	0.0841	0.0872
																														362.8	0.1057	0.0784	0.06	0.1506	0.1283	0.1194	0.1483	0.1326	0.1448	0.1327	0.1319	0.1414			362.8	0.055	0.0085	0.0827	0.089
																														363.2	0.1065	0.0795	0.0603	0.1529	0.1283	0.1205	0.1486	0.133	0.1464	0.1324	0.1315	0.1409			363.2	0.0534	0.008	0.0836	0.0883
																														363.6	0.1069	0.0797	0.0612	0.1524	0.1283	0.1198	0.1487	0.1318	0.1453	0.1329	0.1314	0.1421			363.6	0.0542	0.008	0.0842	0.0889
																														364	0.107	0.0799	0.0605	0.1527	0.1303	0.1206	0.1491	0.1322	0.1465	0.1325	0.1324	0.1417			364	0.0541	0.0082	0.0839	0.0877
																														364.4	0.1061	0.0801	0.0606	0.1511	0.1292	0.121	0.148	0.1336	0.1458	0.1316	0.1327	0.1415			364.4	0.0535	0.009	0.0844	0.0877
																														364.8	0.1058	0.0796	0.0602	0.1512	0.1289	0.1197	0.148	0.1332	0.1454	0.1324	0.1307	0.1413			364.8	0.0541	0.0083	0.0837	0.0876
																														365.2	0.1061	0.0797	0.0609	0.1524	0.129	0.1207	0.1489	0.1335	0.1454	0.1323	0.1322	0.1409			365.2	0.0538	0.0084	0.0836	0.0885
																														365.6	0.1058	0.0798	0.0606	0.1509	0.1292	0.12	0.1473	0.1326	0.1452	0.1326	0.1321	0.1402			365.6	0.0537	0.0081	0.0835	0.0878
																														366	0.1062	0.08	0.0601	0.151	0.1297	0.1199	0.148	0.1323	0.1465	0.1313	0.1328	0.1417			366	0.0536	0.008	0.084	0.0884
																														366.4	0.1058	0.08	0.0622	0.1531	0.1281	0.121	0.1482	0.133	0.1455	0.1325	0.1318	0.1421			366.4	0.0542	0.0083	0.0842	0.0878
																														366.8	0.1063	0.0796	0.0607	0.1525	0.1279	0.1208	0.1488	0.1327	0.146	0.1327	0.1322	0.1417			366.8	0.0548	0.007	0.0844	0.0893
																														367.2	0.1065	0.0789	0.0602	0.1524	0.1285	0.1198	0.148	0.1327	0.1451	0.1328	0.1319	0.141			367.2	0.0546	0.0083	0.083	0.0881
																														367.6	0.1066	0.0792	0.0606	0.152	0.1283	0.1204	0.149	0.1324	0.1453	0.1326	0.1315	0.1416			367.6	0.0548	0.0081	0.0837	0.0878
																														368	0.1059	0.0798	0.0607	0.1516	0.129	0.1208	0.1471	0.1323	0.1457	0.1325	0.1332	0.141			368	0.0526	0.0088	0.0835	0.0871
																														368.4	0.1064	0.08	0.0622	0.151	0.1294	0.1211	0.148	0.1327	0.146	0.1316	0.1314	0.1422			368.4	0.0548	0.008	0.0852	0.0883
																														368.8	0.106	0.0809	0.0599	0.1508	0.1304	0.1187	0.1471	0.1346	0.1462	0.1321	0.1328	0.1404			368.8	0.0539	0.0106	0.0834	0.0877
																														369.2	0.1066	0.0788	0.0604	0.1519	0.1289	0.1205	0.149	0.133	0.145	0.132	0.1307	0.1414			369.2	0.0555	0.0077	0.0833	0.09
																														369.6	0.1057	0.0799	0.0603	0.151	0.1286	0.1207	0.1478	0.1325	0.1461	0.1329	0.1327	0.141			369.6	0.0546	0.0087	0.0839	0.0877
																														370	0.1056	0.0794	0.061	0.1509	0.1292	0.1198	0.1484	0.132	0.1446	0.132	0.1317	0.1416			370	0.0543	0.0068	0.0841	0.0888
																														370.4	0.1053	0.0802	0.0605	0.1516	0.1278	0.1204	0.1488	0.1327	0.1462	0.1328	0.1313	0.1415			370.4	0.0544	0.0078	0.0844	0.0876
																														370.8	0.1071	0.0798	0.0615	0.153	0.1295	0.1213	0.1485	0.1328	0.1467	0.1318	0.1309	0.1425			370.8	0.0543	0.008	0.0848	0.0886
																														371.2	0.1065	0.0804	0.0615	0.1519	0.1288	0.1219	0.1484	0.1335	0.1459	0.1331	0.1321	0.1418			371.2	0.0544	0.0084	0.0846	0.0888
																														371.6	0.1068	0.0796	0.0622	0.1517	0.1287	0.1208	0.149	0.1321	0.1454	0.1332	0.1317	0.1412			371.6	0.0551	0.0089	0.0841	0.0893
																														372	0.1073	0.0794	0.0605	0.152	0.1273	0.1202	0.1482	0.1313	0.1453	0.1332	0.1311	0.1412			372	0.0554	0.0076	0.0842	0.089
																														372.4	0.1072	0.0814	0.0613	0.152	0.1307	0.1209	0.1482	0.1343	0.1454	0.1324	0.1329	0.1416			372.4	0.0548	0.0095	0.0844	0.0884
																														372.8	0.1065	0.0814	0.0608	0.1506	0.1291	0.1202	0.148	0.1335	0.1454	0.1319	0.1333	0.1408			372.8	0.0539	0.0087	0.0844	0.0869
																														373.2	0.1063	0.0813	0.0615	0.151	0.1295	0.121	0.1489	0.1335	0.1454	0.1322	0.1319	0.1428			373.2	0.0545	0.0094	0.0851	0.0881
																														373.6	0.1071	0.0813	0.0619	0.1515	0.129	0.1208	0.148	0.1319	0.1459	0.1325	0.1316	0.1414			373.6	0.0547	0.0079	0.0859	0.0886
																														374	0.1079	0.0797	0.0612	0.1533	0.1286	0.1209	0.1494	0.1328	0.1445	0.1334	0.131	0.142			374	0.0556	0.0089	0.0839	0.0897
																														374.4	0.1072	0.0798	0.0601	0.1522	0.1297	0.1202	0.1478	0.1322	0.1449	0.1327	0.1315	0.1402			374.4	0.0553	0.0083	0.0836	0.0888
																														374.8	0.1072	0.0809	0.0611	0.1522	0.1286	0.121	0.1483	0.1324	0.1449	0.1326	0.1324	0.1419			374.8	0.0553	0.0088	0.0848	0.0888
																														375.2	0.107	0.081	0.0614	0.1512	0.1295	0.1206	0.1486	0.1333	0.146	0.1329	0.1314	0.1409			375.2	0.0544	0.0092	0.0847	0.089
																														375.6	0.1062	0.0816	0.0609	0.1512	0.13	0.1202	0.1488	0.1338	0.145	0.1318	0.1323	0.1414			375.6	0.0547	0.0092	0.0842	0.088
																														376	0.1066	0.0801	0.0615	0.1515	0.1284	0.1212	0.1489	0.1318	0.1457	0.1325	0.1327	0.1413			376	0.055	0.0084	0.0843	0.0891
																														376.4	0.1069	0.0807	0.061	0.1513	0.1298	0.1211	0.1485	0.1338	0.1459	0.1323	0.1314	0.141			376.4	0.0547	0.0091	0.0844	0.0887
																														376.8	0.1068	0.0817	0.0625	0.1519	0.1299	0.1214	0.1484	0.1332	0.1459	0.1335	0.1331	0.142			376.8	0.0547	0.0091	0.0861	0.0887
																														377.2	0.1068	0.0821	0.0619	0.1512	0.1294	0.1202	0.147	0.1334	0.1463	0.132	0.1315	0.1416			377.2	0.0552	0.0094	0.0855	0.0875
																														377.6	0.1067	0.0816	0.0611	0.1518	0.1299	0.1199	0.1477	0.1334	0.1453	0.1335	0.1331	0.141			377.6	0.0547	0.009	0.0848	0.0895
																														378	0.1064	0.0815	0.0608	0.1505	0.1283	0.1206	0.1476	0.1339	0.1456	0.132	0.1311	0.1409			378	0.0541	0.0089	0.0846	0.0874
																														378.4	0.1065	0.0809	0.0622	0.1506	0.1286	0.122	0.1478	0.1327	0.1461	0.1307	0.1321	0.1424			378.4	0.0546	0.0087	0.0855	0.0888
																														378.8	0.1069	0.0808	0.0617	0.1524	0.1278	0.1206	0.1488	0.1309	0.1458	0.1318	0.1308	0.1426			378.8	0.0545	0.0071	0.0859	0.0887
																														379.2	0.1073	0.0815	0.0617	0.152	0.1298	0.1213	0.1488	0.1329	0.1462	0.1324	0.1323	0.1407			379.2	0.0551	0.0097	0.0852	0.0888
																														379.6	0.1071	0.0816	0.0613	0.1524	0.1299	0.1205	0.1484	0.1339	0.1446	0.1322	0.1315	0.1415			379.6	0.0545	0.009	0.0848	0.0883
																														380	0.1074	0.0822	0.061	0.1511	0.1298	0.1205	0.1485	0.1334	0.1455	0.1327	0.1335	0.141			380	0.0558	0.0099	0.0846	0.0891
																														380.4	0.1073	0.081	0.0614	0.1518	0.1286	0.1211	0.1491	0.1322	0.1459	0.1333	0.1314	0.1422			380.4	0.0561	0.009	0.085	0.0889
																														380.8	0.1065	0.0811	0.0626	0.151	0.1295	0.1216	0.1479	0.1338	0.1455	0.1322	0.1319	0.1423			380.8	0.0545	0.009	0.0854	0.0892
																														381.2	0.1072	0.0829	0.0628	0.1521	0.13	0.1222	0.1495	0.1336	0.146	0.1314	0.1324	0.1419			381.2	0.0561	0.0094	0.0869	0.089
																														381.6	0.1077	0.0814	0.0612	0.1522	0.1292	0.1212	0.1484	0.133	0.1443	0.1327	0.132	0.1407			381.6	0.055	0.0094	0.085	0.089
																														382	0.1078	0.0812	0.0625	0.1525	0.1295	0.1214	0.1489	0.1327	0.1458	0.1332	0.1318	0.1417			382	0.0556	0.0084	0.0854	0.0888
																														382.4	0.1082	0.0813	0.0607	0.152	0.1297	0.1205	0.1479	0.133	0.1445	0.1327	0.1326	0.1403			382.4	0.0552	0.0097	0.0837	0.089
																														382.8	0.1062	0.0814	0.0617	0.1504	0.1294	0.1212	0.1467	0.132	0.1451	0.1312	0.1324	0.1405			382.8	0.0534	0.0089	0.0853	0.0878
																														383.2	0.1095	0.0814	0.063	0.1522	0.1291	0.1219	0.1481	0.1328	0.1462	0.1328	0.1322	0.1409			383.2	0.0558	0.0092	0.0857	0.0903
																														383.6	0.1068	0.0823	0.0627	0.1503	0.1283	0.1223	0.148	0.133	0.146	0.1314	0.1332	0.1422			383.6	0.0539	0.0096	0.0868	0.0879
																														384	0.1077	0.0814	0.0619	0.1525	0.1288	0.1214	0.1485	0.1331	0.1455	0.1324	0.1318	0.141			384	0.0555	0.0091	0.0854	0.0901
																														384.4	0.1077	0.0821	0.063	0.1505	0.1292	0.1224	0.1486	0.133	0.146	0.1326	0.132	0.1422			384.4	0.0547	0.009	0.0869	0.0883
																														384.8	0.1075	0.081	0.0621	0.1528	0.1297	0.1214	0.1489	0.1325	0.146	0.133	0.1325	0.1415			384.8	0.0559	0.0097	0.0848	0.089
																														385.2	0.1077	0.0826	0.0612	0.1517	0.1297	0.1217	0.1483	0.1339	0.1469	0.1335	0.1328	0.143			385.2	0.0543	0.0093	0.0867	0.0887
																														385.6	0.1089	0.0821	0.0619	0.1524	0.1287	0.1207	0.1488	0.1331	0.1452	0.1316	0.1316	0.1406			385.6	0.0557	0.0088	0.0862	0.0905
																														386	0.1075	0.0821	0.0626	0.1513	0.1293	0.1227	0.1481	0.1339	0.1451	0.133	0.1326	0.143			386	0.0545	0.0095	0.0866	0.0885
																														386.4	0.1077	0.0816	0.0634	0.1522	0.1288	0.1212	0.1476	0.1331	0.145	0.1314	0.1311	0.1422			386.4	0.0547	0.0086	0.0861	0.0887
																														386.8	0.1073	0.0822	0.0619	0.1525	0.1298	0.121	0.1488	0.132	0.1442	0.1323	0.1322	0.1416			386.8	0.055	0.0092	0.0856	0.0891
																														387.2	0.1059	0.0815	0.0615	0.1513	0.1286	0.1216	0.1473	0.1324	0.145	0.1323	0.13	0.1415			387.2	0.0548	0.0073	0.086	0.0892
																														387.6	0.1084	0.0828	0.062	0.1522	0.1282	0.1217	0.1495	0.1331	0.1464	0.1336	0.1319	0.1419			387.6	0.0564	0.0107	0.0867	0.0901
																														388	0.1073	0.0818	0.0617	0.1527	0.1295	0.122	0.1478	0.1327	0.1462	0.1326	0.1316	0.1418			388	0.0547	0.0098	0.0857	0.089
																														388.4	0.1084	0.082	0.0623	0.151	0.1286	0.1207	0.1474	0.1332	0.1443	0.1313	0.1321	0.1401			388.4	0.0551	0.0092	0.0857	0.0884
																														388.8	0.1084	0.0827	0.0629	0.1523	0.1289	0.1223	0.1483	0.1328	0.1468	0.1326	0.1325	0.1409			388.8	0.0556	0.0086	0.0871	0.0905
																														389.2	0.1076	0.0825	0.0628	0.1526	0.1295	0.121	0.1475	0.1333	0.1456	0.1323	0.1319	0.1426			389.2	0.0556	0.0084	0.0867	0.0882
																														389.6	0.1073	0.083	0.0626	0.1515	0.13	0.1224	0.1477	0.1332	0.1454	0.1318	0.1329	0.1418			389.6	0.0561	0.0097	0.0866	0.0887
																														390	0.1073	0.0833	0.063	0.1524	0.1296	0.1211	0.1494	0.1329	0.1449	0.1326	0.1324	0.1408			390	0.0566	0.0104	0.0869	0.0901
																														390.4	0.1078	0.0833	0.0621	0.1526	0.1284	0.1215	0.1493	0.1333	0.1447	0.1323	0.1319	0.1405			390.4	0.0556	0.009	0.0867	0.0899
																														390.8	0.1075	0.0823	0.0633	0.1507	0.128	0.1227	0.1481	0.132	0.1463	0.1323	0.1329	0.1423			390.8	0.0547	0.0094	0.0873	0.0892
																														391.2	0.1074	0.0829	0.0633	0.1517	0.1301	0.1226	0.1471	0.1329	0.1446	0.1316	0.1331	0.1414			391.2	0.0555	0.0095	0.0868	0.0886
																														391.6	0.1079	0.0824	0.0616	0.152	0.1288	0.1217	0.1477	0.1329	0.1454	0.1326	0.1311	0.141			391.6	0.0546	0.0085	0.0861	0.0888
																														392	0.1087	0.0829	0.0628	0.1523	0.1298	0.1215	0.1485	0.1335	0.1449	0.1335	0.1326	0.1415			392	0.057	0.01	0.0862	0.0902
																														392.4	0.1081	0.0831	0.0619	0.1508	0.1289	0.1217	0.1481	0.1338	0.1453	0.132	0.1321	0.1415			392.4	0.0566	0.0094	0.0863	0.0894
																														392.8	0.1085	0.0824	0.0637	0.1524	0.1292	0.122	0.1481	0.1325	0.1465	0.1335	0.1321	0.1413			392.8	0.0554	0.0095	0.0867	0.0895
																														393.2	0.1069	0.0832	0.0634	0.1502	0.1294	0.1227	0.1485	0.1329	0.1468	0.1313	0.1315	0.1423			393.2	0.0549	0.0089	0.0873	0.0881
																														393.6	0.1075	0.0837	0.0627	0.1498	0.1289	0.1217	0.1475	0.1319	0.1453	0.1315	0.1319	0.1415			393.6	0.0545	0.0094	0.0875	0.0884
																														394	0.1079	0.0832	0.064	0.1511	0.1304	0.1228	0.1474	0.1335	0.1454	0.132	0.1319	0.142			394	0.0549	0.0095	0.0871	0.089
																														394.4	0.107	0.0838	0.0626	0.1516	0.1291	0.122	0.1476	0.1326	0.1454	0.133	0.1336	0.1407			394.4	0.055	0.0104	0.0871	0.089
																														394.8	0.1075	0.084	0.063	0.1519	0.1289	0.1224	0.1487	0.1334	0.146	0.133	0.1318	0.1412			394.8	0.0562	0.009	0.0875	0.0905
																														395.2	0.1076	0.0826	0.0627	0.1511	0.13	0.1212	0.1473	0.1331	0.1454	0.1321	0.1318	0.1403			395.2	0.0552	0.0094	0.0861	0.0889
																														395.6	0.1087	0.0832	0.0629	0.151	0.1294	0.1221	0.1484	0.133	0.1451	0.1318	0.1321	0.1411			395.6	0.0562	0.0099	0.087	0.0893
																														396	0.1081	0.0828	0.062	0.1519	0.1291	0.1228	0.1471	0.1321	0.1451	0.1318	0.132	0.1409			396	0.0553	0.0092	0.0866	0.0893
																														396.4	0.1082	0.0833	0.0629	0.152	0.1295	0.1222	0.148	0.1335	0.1447	0.1326	0.1318	0.1412			396.4	0.0552	0.0111	0.086	0.0894
																														396.8	0.1081	0.0832	0.0626	0.1522	0.1281	0.122	0.1476	0.1324	0.144	0.1339	0.1321	0.1406			396.8	0.0557	0.0084	0.0873	0.0892
																														397.2	0.1071	0.084	0.0628	0.1512	0.1283	0.1225	0.1474	0.1334	0.1458	0.1326	0.132	0.1409			397.2	0.0547	0.0097	0.0879	0.0892
																														397.6	0.1098	0.0821	0.0626	0.152	0.1282	0.1218	0.1482	0.1331	0.1456	0.1332	0.1319	0.1415			397.6	0.0556	0.0095	0.0862	0.0903
																														398	0.1082	0.0837	0.0627	0.1518	0.1303	0.1225	0.148	0.134	0.1457	0.1331	0.1319	0.1414			398	0.0553	0.0107	0.0874	0.0891
																														398.4	0.1096	0.0835	0.0638	0.153	0.1296	0.1227	0.1474	0.1332	0.1457	0.1329	0.1321	0.1407			398.4	0.057	0.0105	0.087	0.0902
																														398.8	0.1087	0.0834	0.0633	0.1523	0.128	0.1221	0.1488	0.1321	0.1458	0.1327	0.1313	0.1424			398.8	0.0555	0.009	0.0881	0.0904
																														399.2	0.1083	0.0831	0.0634	0.1529	0.1293	0.1231	0.1481	0.1336	0.144	0.1326	0.133	0.1412			399.2	0.0563	0.0107	0.0869	0.0908
																														399.6	0.1081	0.0836	0.0632	0.1508	0.1298	0.1216	0.1487	0.1336	0.1449	0.1326	0.1319	0.1412			399.6	0.0562	0.0096	0.0871	0.0892
																														400	0.1094	0.0852	0.0631	0.1522	0.1301	0.1226	0.1487	0.1334	0.1461	0.1328	0.133	0.1415			400	0.0563	0.0109	0.0883	0.0903
																														400.4	0.1085	0.0841	0.0629	0.1519	0.129	0.1223	0.1492	0.1334	0.1453	0.1323	0.1309	0.1418			400.4	0.0563	0.0089	0.088	0.0894
																														400.8	0.1087	0.0846	0.0637	0.1525	0.1289	0.1236	0.1486	0.1334	0.1464	0.1322	0.1323	0.1416			400.8	0.0551	0.0104	0.0888	0.0902
																														401.2	0.1087	0.0838	0.0635	0.1528	0.1292	0.1226	0.1478	0.1337	0.1452	0.1335	0.1323	0.1425			401.2	0.0557	0.0095	0.0874	0.0896
																														401.6	0.1085	0.0831	0.0622	0.1528	0.1288	0.1215	0.1482	0.1326	0.1445	0.1324	0.1321	0.1411			401.6	0.0558	0.0096	0.0864	0.0908
																														402	0.1096	0.0843	0.0628	0.1527	0.1299	0.1212	0.1489	0.1334	0.1449	0.1333	0.1322	0.1409			402	0.058	0.0104	0.0869	0.0903
																														402.4	0.1077	0.0835	0.0635	0.1513	0.1296	0.1218	0.1489	0.1327	0.1446	0.131	0.1324	0.141			402.4	0.0554	0.0103	0.087	0.0882
																														402.8	0.1091	0.0853	0.0626	0.1521	0.1302	0.1207	0.1483	0.1341	0.1442	0.1327	0.132	0.1407			402.8	0.0566	0.0103	0.0878	0.0897
																														403.2	0.1088	0.0839	0.0649	0.1517	0.1286	0.1234	0.1482	0.1327	0.147	0.1319	0.1316	0.1431			403.2	0.0563	0.0094	0.0885	0.0905
																														403.6	0.11	0.0833	0.0638	0.1528	0.1291	0.123	0.148	0.133	0.1442	0.133	0.1322	0.141			403.6	0.0561	0.0107	0.087	0.0901
																														404	0.1093	0.0826	0.0639	0.1531	0.1291	0.1223	0.1481	0.1333	0.1452	0.1333	0.1324	0.1416			404	0.0569	0.0102	0.0864	0.0905
																														404.4	0.1109	0.085	0.0637	0.1524	0.1309	0.122	0.149	0.1339	0.1457	0.1338	0.132	0.1415			404.4	0.0567	0.0108	0.0875	0.0908
																														404.8	0.1103	0.0844	0.0637	0.154	0.1282	0.1222	0.1496	0.1325	0.145	0.135	0.1321	0.1403			404.8	0.0583	0.0097	0.0879	0.0909
																														405.2	0.1089	0.0852	0.0628	0.1513	0.1296	0.1231	0.1488	0.1338	0.145	0.1318	0.1324	0.141			405.2	0.055	0.011	0.0882	0.0893
																														405.6	0.1086	0.0831	0.0635	0.152	0.1287	0.1233	0.1483	0.1327	0.146	0.1319	0.133	0.1411			405.6	0.0561	0.0095	0.0868	0.0902
																														406	0.1084	0.0834	0.0635	0.1518	0.1292	0.1231	0.1475	0.1324	0.1457	0.131	0.1315	0.1421			406	0.0546	0.0098	0.0872	0.089
																														406.4	0.1084	0.0841	0.0643	0.1521	0.1304	0.1222	0.1477	0.1323	0.1445	0.133	0.132	0.1408			406.4	0.0558	0.0105	0.0883	0.0894
																														406.8	0.1093	0.0841	0.0641	0.1523	0.1296	0.1222	0.1492	0.1337	0.1444	0.1325	0.1317	0.1408			406.8	0.0564	0.0109	0.0878	0.09
																														407.2	0.1098	0.0856	0.0643	0.1523	0.1303	0.1228	0.1484	0.1338	0.145	0.1325	0.1333	0.1424			407.2	0.056	0.0114	0.089	0.0902
																														407.6	0.1086	0.0847	0.0641	0.1514	0.1286	0.1222	0.1481	0.1345	0.1448	0.1328	0.1334	0.1414			407.6	0.0566	0.0106	0.0882	0.0897
																														408	0.1102	0.0841	0.064	0.1529	0.1296	0.123	0.1499	0.1333	0.1464	0.1342	0.1341	0.1423			408	0.0574	0.0105	0.0875	0.091
																														408.4	0.1081	0.0834	0.0629	0.1514	0.128	0.1226	0.1486	0.1311	0.145	0.1327	0.1315	0.1415			408.4	0.0563	0.0086	0.0879	0.0893
																														408.8	0.1088	0.085	0.0632	0.1514	0.1296	0.1235	0.1477	0.1324	0.1455	0.1314	0.1317	0.1414			408.8	0.0558	0.0108	0.0882	0.0906
																														409.2	0.1092	0.0839	0.064	0.1524	0.1283	0.1226	0.1483	0.1317	0.1444	0.133	0.1322	0.141			409.2	0.0558	0.0098	0.0877	0.09
																														409.6	0.1087	0.0849	0.0649	0.1522	0.1292	0.1227	0.1477	0.1338	0.1457	0.1319	0.1331	0.1411			409.6	0.0559	0.0108	0.0885	0.0906
																														410	0.1089	0.0842	0.064	0.1511	0.1297	0.1224	0.1484	0.1335	0.1457	0.1328	0.1327	0.1422			410	0.0554	0.0105	0.088	0.0898
																														410.4	0.1098	0.084	0.0653	0.1519	0.1298	0.1235	0.1486	0.1323	0.1467	0.1325	0.1322	0.142			410.4	0.0569	0.0101	0.0888	0.0903
																														410.8	0.1092	0.084	0.0633	0.1512	0.1286	0.122	0.1469	0.1326	0.1456	0.1322	0.131	0.1408			410.8	0.0558	0.0106	0.0876	0.0902
																														411.2	0.109	0.085	0.064	0.1515	0.1293	0.1228	0.1472	0.1336	0.1447	0.132	0.1325	0.1408			411.2	0.056	0.0104	0.0884	0.0902
																														411.6	0.1106	0.0846	0.0631	0.1541	0.13	0.122	0.1489	0.1331	0.1444	0.1349	0.132	0.1412			411.6	0.0573	0.0108	0.0875	0.0912
																														412	0.1103	0.0841	0.065	0.1517	0.1285	0.122	0.1484	0.1326	0.1466	0.1328	0.1316	0.1411			412	0.0571	0.0094	0.0886	0.0903
																														412.4	0.1108	0.0858	0.064	0.1528	0.1301	0.1227	0.1486	0.1333	0.1462	0.1332	0.1332	0.1423			412.4	0.0573	0.0114	0.0899	0.0914
																														412.8	0.1088	0.0841	0.0636	0.1523	0.1296	0.1226	0.1477	0.1327	0.1446	0.1325	0.1315	0.1413			412.8	0.0557	0.0099	0.0876	0.0911
																														413.2	0.1083	0.0862	0.0637	0.1521	0.1284	0.1229	0.1475	0.1329	0.1446	0.1311	0.1316	0.1425			413.2	0.0571	0.0112	0.0896	0.0904
																														413.6	0.1093	0.084	0.0641	0.1525	0.1285	0.1236	0.1481	0.1337	0.1451	0.1324	0.1316	0.1425			413.6	0.0574	0.0096	0.0885	0.0908
																														414	0.1106	0.0868	0.0646	0.153	0.131	0.1233	0.1489	0.1345	0.1457	0.1328	0.1331	0.1416			414	0.057	0.0112	0.0894	0.0904
																														414.4	0.1108	0.0856	0.0633	0.1529	0.1296	0.123	0.1488	0.1329	0.1454	0.1326	0.1318	0.1407			414.4	0.0574	0.0096	0.0896	0.0907
																														414.8	0.1102	0.0844	0.0642	0.1523	0.1284	0.1216	0.1478	0.1323	0.1449	0.1338	0.1312	0.1412			414.8	0.0579	0.0103	0.0882	0.0914
																														415.2	0.1095	0.0857	0.0646	0.1528	0.1293	0.1235	0.149	0.133	0.1458	0.1319	0.1321	0.1416			415.2	0.0572	0.011	0.0895	0.0908
																														415.6	0.1089	0.0854	0.0652	0.1524	0.1285	0.124	0.1489	0.1327	0.1457	0.1323	0.1317	0.1411			415.6	0.0556	0.0106	0.0896	0.0902
																														416	0.1102	0.0859	0.0634	0.1528	0.1298	0.1232	0.1479	0.1322	0.1446	0.1324	0.1322	0.141			416	0.0581	0.01	0.0892	0.0905
																														416.4	0.1101	0.0843	0.0647	0.151	0.1294	0.1239	0.1479	0.1325	0.1456	0.1329	0.1321	0.1407			416.4	0.0567	0.01	0.0885	0.0906
																														416.8	0.1099	0.0846	0.0645	0.1534	0.1295	0.1223	0.1491	0.131	0.1454	0.1325	0.132	0.1407			416.8	0.0574	0.0105	0.088	0.0908
																														417.2	0.1104	0.0851	0.0646	0.1521	0.1286	0.1237	0.1477	0.1322	0.146	0.1335	0.1318	0.1419			417.2	0.0577	0.0096	0.0897	0.0914
																														417.6	0.1096	0.0858	0.0641	0.1536	0.1286	0.1222	0.1481	0.1332	0.1453	0.1327	0.1333	0.142			417.6	0.0564	0.0112	0.0895	0.0914
																														418	0.1094	0.0846	0.063	0.1533	0.1286	0.1225	0.1482	0.1325	0.1446	0.1328	0.1321	0.1407			418	0.0559	0.0104	0.0878	0.0911
																														418.4	0.1102	0.0859	0.0639	0.1515	0.1295	0.1234	0.1478	0.1338	0.1446	0.1325	0.1335	0.1417			418.4	0.0564	0.012	0.0887	0.0901
																														418.8	0.111	0.0854	0.0653	0.1525	0.1299	0.1225	0.1483	0.1317	0.1451	0.1342	0.1315	0.1403			418.8	0.0576	0.0102	0.0892	0.0906
																														419.2	0.1115	0.0859	0.0649	0.1515	0.1294	0.1242	0.1487	0.1339	0.1461	0.1334	0.1319	0.1416			419.2	0.0579	0.0114	0.0894	0.0904
																														419.6	0.1094	0.0843	0.0644	0.1514	0.1291	0.1218	0.1485	0.1319	0.1452	0.1333	0.1311	0.1407			419.6	0.0563	0.0095	0.0882	0.091
																														420	0.1095	0.0864	0.0644	0.1521	0.1304	0.1232	0.1474	0.1335	0.1457	0.1317	0.1326	0.1432			420	0.0567	0.0114	0.0897	0.0909
																														420.4	0.1095	0.0862	0.0657	0.1512	0.1307	0.1242	0.1468	0.1339	0.1453	0.1308	0.1324	0.1416			420.4	0.0559	0.0105	0.0895	0.0893
																														420.8	0.1099	0.0864	0.0637	0.1524	0.1297	0.1225	0.1491	0.1329	0.1446	0.1321	0.1316	0.1421			420.8	0.056	0.0112	0.0892	0.091
																														421.2	0.1103	0.0857	0.0645	0.1521	0.1295	0.1238	0.147	0.134	0.1456	0.133	0.1323	0.1408			421.2	0.0569	0.0103	0.0889	0.0907
																														421.6	0.1108	0.0856	0.0637	0.1523	0.1292	0.1219	0.1484	0.1329	0.1448	0.1335	0.1307	0.1401			421.6	0.0575	0.0097	0.0889	0.0919
																														422	0.1102	0.0872	0.0654	0.1514	0.1295	0.1232	0.1479	0.134	0.1452	0.1327	0.1336	0.141			422	0.0567	0.0115	0.0907	0.0909
																														422.4	0.1114	0.0866	0.0644	0.152	0.13	0.1229	0.1482	0.1338	0.1455	0.1323	0.133	0.1417			422.4	0.0575	0.0113	0.0893	0.0914
																														422.8	0.1098	0.0872	0.0652	0.1535	0.1302	0.1236	0.1488	0.1333	0.1449	0.1332	0.1332	0.1423			422.8	0.0571	0.0113	0.0905	0.091
																														423.2	0.1109	0.0862	0.0634	0.1517	0.1291	0.1226	0.1473	0.1333	0.1441	0.1333	0.1321	0.1411			423.2	0.057	0.0114	0.0888	0.091
																														423.6	0.1107	0.0859	0.0648	0.1523	0.1279	0.1239	0.1488	0.1335	0.1442	0.1331	0.1314	0.1412			423.6	0.0567	0.0106	0.0896	0.0913
																														424	0.111	0.0847	0.0656	0.1525	0.1284	0.1242	0.1482	0.1324	0.146	0.1339	0.1316	0.1417			424	0.0584	0.0094	0.0898	0.0919
																														424.4	0.1118	0.0871	0.0654	0.1526	0.128	0.1232	0.1491	0.133	0.1462	0.1335	0.1328	0.1407			424.4	0.0581	0.0111	0.0903	0.0919
																														424.8	0.1098	0.0865	0.0658	0.1509	0.1292	0.1235	0.1484	0.1324	0.1468	0.1329	0.1326	0.1419			424.8	0.0571	0.0107	0.0905	0.0902
																														425.2	0.1096	0.0856	0.0641	0.1516	0.1293	0.1229	0.148	0.1321	0.1461	0.1322	0.1308	0.1408			425.2	0.0568	0.0109	0.0895	0.0909
																														425.6	0.1104	0.087	0.0653	0.1524	0.1301	0.124	0.148	0.1331	0.1456	0.1322	0.1325	0.1423			425.6	0.0567	0.0112	0.0906	0.09
																														426	0.1112	0.0857	0.064	0.1526	0.1298	0.1222	0.1482	0.1323	0.1449	0.1334	0.132	0.1398			426	0.0572	0.0108	0.0886	0.0903
																														426.4	0.1115	0.0872	0.0653	0.1532	0.13	0.1246	0.1488	0.1333	0.1457	0.1323	0.133	0.1422			426.4	0.0571	0.0114	0.0911	0.0922
																														426.8	0.111	0.0865	0.0659	0.1522	0.1293	0.1239	0.1489	0.1325	0.1465	0.1326	0.1313	0.1427			426.8	0.0567	0.0105	0.091	0.0915
																														427.2	0.111	0.0871	0.0642	0.1518	0.1301	0.1224	0.149	0.1328	0.1441	0.133	0.1323	0.1407			427.2	0.0565	0.0115	0.0898	0.0923
																														427.6	0.111	0.0858	0.0663	0.1528	0.1285	0.1238	0.1488	0.1327	0.1458	0.1324	0.1307	0.1423			427.6	0.0574	0.01	0.0905	0.0905
																														428	0.1102	0.0857	0.0642	0.1521	0.1291	0.1224	0.1478	0.1323	0.1444	0.1327	0.1324	0.1413			428	0.0572	0.0109	0.0887	0.0906
																														428.4	0.1107	0.0872	0.0658	0.1524	0.1296	0.124	0.1474	0.1327	0.146	0.1325	0.1321	0.1409			428.4	0.0569	0.0107	0.0913	0.0907
																														428.8	0.1106	0.0872	0.0646	0.1528	0.1287	0.1238	0.1475	0.1325	0.1454	0.1324	0.1315	0.1419			428.8	0.0574	0.0097	0.0914	0.0919
																														429.2	0.1105	0.0868	0.0653	0.1513	0.1299	0.1251	0.1482	0.1326	0.1446	0.1329	0.1318	0.142			429.2	0.0564	0.0113	0.091	0.0905
																														429.6	0.1112	0.0859	0.0663	0.1536	0.129	0.1248	0.1499	0.1324	0.1448	0.1337	0.1312	0.1415			429.6	0.0584	0.0109	0.0906	0.0934
																														430	0.1105	0.0867	0.065	0.152	0.1298	0.1232	0.1482	0.1332	0.1455	0.1333	0.1321	0.141			430	0.0579	0.0106	0.0902	0.0912
																														430.4	0.1103	0.0869	0.0657	0.1512	0.1296	0.124	0.1479	0.1329	0.1448	0.1321	0.1329	0.1413			430.4	0.0565	0.0115	0.0903	0.0902
																														430.8	0.1118	0.0869	0.0654	0.1523	0.1284	0.1238	0.1479	0.1319	0.1442	0.1331	0.1323	0.1406			430.8	0.0572	0.0103	0.0908	0.0917
																														431.2	0.1113	0.087	0.0648	0.1523	0.1294	0.1242	0.1486	0.132	0.1449	0.1336	0.131	0.1404			431.2	0.0569	0.0109	0.0907	0.0905
																														431.6	0.1123	0.0872	0.0655	0.1533	0.1288	0.1246	0.1478	0.1334	0.1456	0.1326	0.1333	0.1409			431.6	0.0564	0.0116	0.0908	0.0914
																														432	0.1104	0.0867	0.0663	0.1518	0.1291	0.1231	0.148	0.133	0.1452	0.1315	0.1321	0.1407			432	0.0563	0.0105	0.0906	0.0908
																														432.4	0.1126	0.0877	0.0649	0.1538	0.1292	0.1233	0.149	0.1339	0.1444	0.1336	0.133	0.1407			432.4	0.0586	0.0115	0.0903	0.0924
																														432.8	0.1106	0.0875	0.0649	0.1514	0.1296	0.1226	0.1475	0.133	0.1443	0.1321	0.1323	0.1411			432.8	0.0571	0.0106	0.0901	0.0906
																														433.2	0.1109	0.0865	0.0654	0.1538	0.1284	0.1237	0.1488	0.1321	0.1454	0.1332	0.1306	0.1405			433.2	0.0581	0.0108	0.0909	0.0922
																														433.6	0.1123	0.0864	0.0647	0.1529	0.1305	0.1233	0.1484	0.1327	0.1441	0.1327	0.1315	0.141			433.6	0.0571	0.0111	0.0896	0.0925
																														434	0.112	0.0876	0.0658	0.1523	0.1287	0.1239	0.1486	0.1323	0.1453	0.133	0.1306	0.1407			434	0.0584	0.0116	0.0912	0.0923
																														434.4	0.1104	0.0878	0.0668	0.1517	0.1306	0.1253	0.1485	0.1329	0.1452	0.1316	0.1328	0.1424			434.4	0.057	0.0121	0.091	0.0913
																														434.8	0.1121	0.0875	0.0645	0.1522	0.1286	0.1228	0.1488	0.1323	0.1444	0.1323	0.1322	0.1403			434.8	0.0569	0.0112	0.09	0.092
																														435.2	0.1113	0.0871	0.0664	0.1535	0.1288	0.1239	0.1493	0.1331	0.1454	0.1322	0.1312	0.142			435.2	0.0578	0.0111	0.0913	0.0907
																														435.6	0.1104	0.0868	0.0662	0.1521	0.1287	0.1249	0.1483	0.1322	0.1455	0.1321	0.1313	0.1404			435.6	0.0576	0.0109	0.0911	0.0909
																														436	0.1119	0.0871	0.0661	0.1521	0.1288	0.1242	0.1492	0.1326	0.1447	0.1329	0.1316	0.1419			436	0.057	0.0115	0.0912	0.0912
																														436.4	0.1113	0.0876	0.0666	0.152	0.1292	0.1246	0.1484	0.1324	0.1457	0.1327	0.1317	0.1408			436.4	0.0578	0.0113	0.0916	0.0916
																														436.8	0.1124	0.0893	0.0655	0.1508	0.1296	0.1243	0.1495	0.1331	0.1445	0.1327	0.133	0.141			436.8	0.0588	0.0122	0.0914	0.0916
																														437.2	0.1119	0.0877	0.0668	0.152	0.1294	0.1249	0.1476	0.1345	0.1456	0.1326	0.1319	0.1416			437.2	0.0572	0.0109	0.0915	0.0918
																														437.6	0.1125	0.0886	0.0646	0.1518	0.1298	0.1224	0.1473	0.1327	0.1453	0.1315	0.132	0.1413			437.6	0.0573	0.012	0.0914	0.0911
																														438	0.1117	0.0873	0.0664	0.1518	0.1288	0.1242	0.1482	0.1322	0.1457	0.1328	0.1309	0.1415			438	0.0569	0.0102	0.0917	0.0916
																														438.4	0.1114	0.0875	0.0665	0.1525	0.1299	0.1249	0.1489	0.1329	0.1444	0.1332	0.133	0.1421			438.4	0.0582	0.012	0.0909	0.092
																														438.8	0.1118	0.088	0.0664	0.1517	0.1297	0.1244	0.1483	0.1339	0.1449	0.1332	0.1326	0.141			438.8	0.0579	0.011	0.0914	0.0914
																														439.2	0.1116	0.0877	0.0656	0.1529	0.1295	0.1249	0.148	0.1346	0.1452	0.1325	0.1333	0.1417			439.2	0.0585	0.0123	0.0903	0.0927
																														439.6	0.113	0.0881	0.0668	0.1515	0.1295	0.1246	0.1489	0.1333	0.1456	0.1331	0.1321	0.1416			439.6	0.058	0.0117	0.0915	0.0925
																														440	0.1123	0.0882	0.0658	0.1523	0.1296	0.1232	0.1489	0.1325	0.146	0.1323	0.1321	0.1417			440	0.059	0.0122	0.0915	0.0921
																														440.4	0.1117	0.0877	0.0664	0.1522	0.1287	0.1251	0.1471	0.1326	0.1455	0.1316	0.1324	0.1428			440.4	0.0573	0.0116	0.0919	0.0904
																														440.8	0.1116	0.087	0.0649	0.1539	0.129	0.1236	0.1486	0.1321	0.1444	0.134	0.1325	0.1404			440.8	0.0578	0.0109	0.0902	0.0927
																														441.2	0.1126	0.0882	0.0665	0.1538	0.1289	0.125	0.149	0.1326	0.1459	0.1335	0.132	0.1413			441.2	0.0573	0.0117	0.0919	0.0921
																														441.6	0.1126	0.088	0.0659	0.1531	0.1296	0.1242	0.1489	0.1323	0.1448	0.133	0.1314	0.1413			441.6	0.0582	0.0119	0.0915	0.0934
																														442	0.1119	0.0889	0.0658	0.1503	0.1299	0.1243	0.1481	0.1333	0.1459	0.1323	0.1326	0.1416			442	0.057	0.012	0.0924	0.0902
																														442.4	0.1131	0.0877	0.0662	0.1525	0.129	0.1233	0.1474	0.1326	0.1448	0.1329	0.1326	0.1404			442.4	0.0579	0.0108	0.091	0.0921
																														442.8	0.1115	0.0895	0.0657	0.1525	0.1297	0.1234	0.1481	0.1339	0.144	0.1331	0.1335	0.1408			442.8	0.0583	0.0113	0.0922	0.0912
																														443.2	0.1124	0.0892	0.0667	0.1526	0.1293	0.1242	0.1491	0.1333	0.146	0.1332	0.1323	0.1412			443.2	0.0585	0.0115	0.0927	0.0918
																														443.6	0.1115	0.0894	0.0661	0.1519	0.1296	0.1249	0.1468	0.1334	0.1456	0.1315	0.1321	0.1411			443.6	0.0576	0.0125	0.0926	0.0916
																														444	0.1124	0.0887	0.0654	0.1523	0.1302	0.1232	0.1481	0.1323	0.1453	0.1324	0.1332	0.1411			444	0.0575	0.0122	0.0917	0.0917
																														444.4	0.1116	0.0886	0.0665	0.1523	0.1294	0.1244	0.1478	0.1317	0.1452	0.1328	0.1319	0.1417			444.4	0.0567	0.0114	0.0924	0.0922
																														444.8	0.1125	0.0889	0.0658	0.1526	0.1299	0.1248	0.1486	0.1328	0.1457	0.1324	0.1321	0.141			444.8	0.0569	0.0122	0.0917	0.092
																														445.2	0.1124	0.0884	0.0669	0.1529	0.1278	0.1248	0.1475	0.1313	0.1442	0.1326	0.1316	0.1405			445.2	0.0578	0.0106	0.0925	0.0913
																														445.6	0.1129	0.0898	0.0664	0.1534	0.1307	0.1237	0.1483	0.1335	0.1451	0.133	0.1326	0.1405			445.6	0.059	0.012	0.0922	0.0916
																														446	0.1123	0.0887	0.0663	0.153	0.1304	0.1238	0.1474	0.132	0.1436	0.1328	0.1316	0.1418			446	0.0581	0.0116	0.0916	0.0924
																														446.4	0.1129	0.0881	0.0663	0.1539	0.1289	0.1246	0.1471	0.1323	0.1442	0.1327	0.1323	0.1407			446.4	0.0586	0.0115	0.0914	0.0925
																														446.8	0.1139	0.0893	0.0663	0.1535	0.13	0.124	0.1487	0.1337	0.1449	0.1335	0.1333	0.1411			446.8	0.0586	0.0113	0.0926	0.0928
																														447.2	0.1123	0.0892	0.0669	0.1517	0.1295	0.1247	0.1475	0.133	0.1455	0.1318	0.1329	0.1401			447.2	0.0581	0.0115	0.0921	0.0917
																														447.6	0.1128	0.0881	0.0672	0.1546	0.1292	0.1236	0.1501	0.1336	0.1447	0.1337	0.1325	0.1418			447.6	0.0585	0.0119	0.0917	0.0927
																														448	0.1128	0.0882	0.067	0.1533	0.1285	0.1255	0.1481	0.133	0.1449	0.1347	0.1308	0.1415			448	0.0595	0.0112	0.0926	0.0922
																														448.4	0.1129	0.0884	0.0666	0.1534	0.1301	0.1249	0.1498	0.1338	0.1446	0.1342	0.1315	0.1421			448.4	0.0586	0.0117	0.092	0.0924
																														448.8	0.1125	0.0885	0.0673	0.153	0.1285	0.1253	0.1495	0.1318	0.1456	0.1324	0.1319	0.1418			448.8	0.0579	0.0103	0.093	0.0923
																														449.2	0.1126	0.0892	0.0668	0.1522	0.1291	0.1253	0.1476	0.1342	0.1452	0.1309	0.1322	0.1413			449.2	0.0575	0.0121	0.0925	0.0925
																														449.6	0.1142	0.089	0.0664	0.1532	0.1294	0.1236	0.1485	0.1336	0.1451	0.1334	0.1316	0.1397			449.6	0.0589	0.0101	0.0924	0.0923
																														450	0.1133	0.0887	0.0664	0.1526	0.1294	0.1243	0.1473	0.1332	0.1446	0.1327	0.132	0.1406			450	0.0585	0.0127	0.0918	0.0917
																														450.4	0.1128	0.0896	0.0654	0.1535	0.1298	0.1233	0.1482	0.133	0.1448	0.1344	0.1325	0.1398			450.4	0.0591	0.012	0.0922	0.0939
																														450.8	0.1121	0.0898	0.0668	0.1523	0.1285	0.1255	0.1485	0.1311	0.1468	0.1321	0.1322	0.142			450.8	0.0596	0.0111	0.0945	0.0924
																														451.2	0.1126	0.0888	0.0658	0.1525	0.129	0.1235	0.1494	0.1327	0.1444	0.1325	0.1319	0.1404			451.2	0.0588	0.0119	0.0921	0.0929
																														451.6	0.1128	0.0885	0.0669	0.1521	0.1276	0.124	0.1475	0.1314	0.1455	0.1328	0.1313	0.1403			451.6	0.0584	0.011	0.0923	0.0922
																														452	0.1128	0.0897	0.0677	0.1513	0.1294	0.1245	0.1489	0.1343	0.1455	0.1325	0.1331	0.1408			452	0.0578	0.0124	0.0928	0.0914
																														452.4	0.1126	0.0898	0.0657	0.1525	0.1293	0.1234	0.1478	0.1324	0.1445	0.1335	0.1322	0.14			452.4	0.058	0.012	0.0923	0.0921
																														452.8	0.1124	0.09	0.0667	0.1521	0.1307	0.1242	0.1476	0.1328	0.1443	0.1328	0.1334	0.1414			452.8	0.0574	0.0126	0.0925	0.0913
																														453.2	0.1124	0.0891	0.0664	0.1529	0.1294	0.1242	0.1481	0.1329	0.1461	0.133	0.1325	0.1405			453.2	0.0582	0.0112	0.0923	0.0915
																														453.6	0.1131	0.0893	0.0667	0.1527	0.1292	0.1251	0.1482	0.1333	0.1442	0.1333	0.1324	0.1393			453.6	0.0577	0.012	0.092	0.0919
																														454	0.1139	0.0898	0.0671	0.1527	0.1297	0.1245	0.1479	0.1331	0.1443	0.1324	0.1334	0.1422			454	0.0591	0.0126	0.093	0.0927
																														454.4	0.1132	0.0899	0.0663	0.1524	0.1292	0.1249	0.1479	0.1334	0.1452	0.1326	0.1325	0.1404			454.4	0.0576	0.0128	0.0929	0.0918
																														454.8	0.1122	0.0912	0.0675	0.1525	0.131	0.1249	0.1476	0.1321	0.1455	0.1318	0.1333	0.1419			454.8	0.0581	0.0121	0.0938	0.0917
																														455.2	0.1125	0.0895	0.0674	0.1533	0.1294	0.1249	0.148	0.1331	0.1447	0.1323	0.1329	0.1408			455.2	0.0575	0.0129	0.093	0.0921
																														455.6	0.1138	0.0902	0.0671	0.1534	0.1292	0.1245	0.1487	0.1328	0.1448	0.1336	0.1323	0.1404			455.6	0.0588	0.0121	0.0932	0.0929
																														456	0.1132	0.0902	0.0663	0.1537	0.1285	0.1243	0.1482	0.1332	0.144	0.1333	0.1319	0.1405			456	0.0588	0.0123	0.093	0.0918
																														456.4	0.1138	0.0909	0.0675	0.1525	0.1307	0.124	0.1484	0.1342	0.1443	0.1333	0.1333	0.1417			456.4	0.0576	0.013	0.0934	0.092
																														456.8	0.1137	0.0897	0.067	0.1523	0.1287	0.1253	0.1478	0.1324	0.1453	0.1322	0.1323	0.14			456.8	0.0585	0.012	0.0937	0.0929
																														457.2	0.1129	0.0907	0.0682	0.1518	0.1302	0.1261	0.1487	0.1339	0.1457	0.1327	0.1325	0.1423			457.2	0.0578	0.0119	0.0942	0.0927
																														457.6	0.113	0.09	0.0668	0.1518	0.1288	0.1239	0.1486	0.1323	0.1452	0.1326	0.1319	0.1399			457.6	0.0587	0.0122	0.0935	0.0916
																														458	0.1137	0.0898	0.0669	0.1527	0.1289	0.1255	0.1484	0.1321	0.1456	0.1323	0.131	0.1411			458	0.0584	0.0117	0.0936	0.0923
																														458.4	0.1126	0.0903	0.0669	0.1525	0.1292	0.1244	0.1477	0.1336	0.1452	0.1328	0.1331	0.1411			458.4	0.0591	0.0133	0.093	0.0915
																														458.8	0.1135	0.0903	0.0681	0.1534	0.1302	0.1255	0.1471	0.1334	0.1444	0.133	0.1325	0.1419			458.8	0.0574	0.0124	0.0942	0.092
																														459.2	0.1134	0.0912	0.0668	0.1528	0.1302	0.1257	0.1489	0.1333	0.1446	0.1332	0.1321	0.1415			459.2	0.0595	0.0128	0.0939	0.0926
																														459.6	0.1125	0.0912	0.0684	0.151	0.1294	0.1257	0.1479	0.132	0.1467	0.1325	0.133	0.1419			459.6	0.0575	0.013	0.0944	0.0923
																														460	0.1135	0.0903	0.0673	0.1524	0.1288	0.125	0.1494	0.1334	0.1448	0.1334	0.1324	0.1409			460	0.0594	0.0112	0.0938	0.0924
																														460.4	0.1132	0.0914	0.0669	0.1517	0.1294	0.1243	0.1493	0.1335	0.1448	0.1332	0.1326	0.1404			460.4	0.0589	0.0122	0.0945	0.0927
																														460.8	0.1131	0.0906	0.0677	0.1527	0.1296	0.1249	0.1476	0.133	0.1446	0.1327	0.131	0.1398			460.8	0.0579	0.0122	0.0939	0.0915
																														461.2	0.1152	0.0906	0.0663	0.1519	0.13	0.1248	0.149	0.1317	0.1451	0.1342	0.1312	0.1412			461.2	0.0594	0.0127	0.0939	0.0936
																														461.6	0.1135	0.0911	0.0679	0.152	0.1298	0.1251	0.1473	0.1331	0.1448	0.1321	0.1326	0.1409			461.6	0.0584	0.0123	0.0942	0.0919
																														462	0.1126	0.0904	0.0666	0.1531	0.1286	0.1245	0.1488	0.1336	0.1443	0.1328	0.1318	0.14			462	0.0583	0.0122	0.0931	0.0934
																														462.4	0.113	0.0906	0.0675	0.1513	0.1284	0.1251	0.1477	0.1321	0.1452	0.1323	0.1312	0.1396			462.4	0.0572	0.0116	0.0941	0.0917
																														462.8	0.1135	0.0899	0.0669	0.1516	0.129	0.1246	0.1479	0.1335	0.144	0.1328	0.1314	0.1408			462.8	0.0584	0.0126	0.0927	0.092
																														463.2	0.114	0.0908	0.0676	0.1514	0.13	0.1243	0.1476	0.1328	0.1434	0.1321	0.1317	0.139			463.2	0.0581	0.0124	0.0934	0.0921
																														463.6	0.1144	0.0913	0.0674	0.1526	0.1306	0.1262	0.1486	0.1335	0.1451	0.1328	0.1325	0.1416			463.6	0.0597	0.0127	0.0945	0.0931
																														464	0.1139	0.091	0.0676	0.1528	0.1291	0.1252	0.148	0.1338	0.1449	0.1324	0.1321	0.1416			464	0.0582	0.0123	0.0942	0.0931
																														464.4	0.1124	0.0906	0.0676	0.1515	0.1286	0.126	0.1477	0.1324	0.1459	0.1333	0.1324	0.1414			464.4	0.0588	0.0126	0.0941	0.0916
																														464.8	0.113	0.0917	0.0678	0.1526	0.1304	0.126	0.1478	0.1331	0.1442	0.1327	0.1327	0.1401			464.8	0.0592	0.0128	0.0943	0.0919
																														465.2	0.1141	0.0917	0.0671	0.1517	0.1294	0.1252	0.1476	0.1336	0.1445	0.133	0.1314	0.1412			465.2	0.059	0.0125	0.0946	0.0926
																														465.6	0.1155	0.0923	0.0679	0.1535	0.1307	0.1247	0.1493	0.134	0.1441	0.1334	0.1333	0.1402			465.6	0.0593	0.0132	0.094	0.0927
																														466	0.1151	0.0906	0.0681	0.1534	0.129	0.1247	0.148	0.1316	0.1443	0.1332	0.1329	0.1411			466	0.0585	0.012	0.0943	0.0926
																														466.4	0.1152	0.092	0.0678	0.1521	0.1304	0.1257	0.1492	0.1336	0.1443	0.1344	0.1335	0.141			466.4	0.0595	0.0125	0.0942	0.0933
																														466.8	0.1139	0.0903	0.0672	0.1518	0.1289	0.1243	0.1471	0.1323	0.1449	0.1326	0.1316	0.1413			466.8	0.058	0.0124	0.094	0.0925
																														467.2	0.1135	0.0911	0.0678	0.152	0.1303	0.1252	0.1473	0.1332	0.1451	0.1306	0.1322	0.1406			467.2	0.0576	0.0122	0.0937	0.0911
																														467.6	0.1141	0.0918	0.068	0.1534	0.1292	0.1255	0.1485	0.1326	0.1458	0.1318	0.1329	0.1412			467.6	0.0587	0.012	0.0951	0.092
																														468	0.1139	0.0912	0.0673	0.1523	0.1296	0.1257	0.1483	0.1329	0.1455	0.1331	0.1319	0.141			468	0.0594	0.0125	0.0945	0.0926
																														468.4	0.1156	0.0931	0.0684	0.1529	0.1317	0.1256	0.15	0.1341	0.1461	0.1339	0.1339	0.1425			468.4	0.0602	0.0143	0.0955	0.0935
																														468.8	0.1147	0.0909	0.0682	0.1521	0.1293	0.1254	0.1483	0.1328	0.1455	0.1328	0.1315	0.1419			468.8	0.0586	0.012	0.0948	0.0937
																														469.2	0.113	0.0915	0.0686	0.1516	0.1286	0.1257	0.1477	0.1325	0.1446	0.1328	0.1317	0.1413			469.2	0.0586	0.0124	0.0955	0.0923
																														469.6	0.1141	0.0912	0.0671	0.1526	0.1302	0.1251	0.1474	0.133	0.1447	0.1317	0.1304	0.141			469.6	0.0589	0.0116	0.0944	0.0932
																														470	0.1152	0.0922	0.0675	0.1537	0.1293	0.1251	0.1489	0.132	0.1448	0.1336	0.1327	0.1401			470	0.0596	0.0129	0.0951	0.0926
																														470.4	0.1147	0.0918	0.0683	0.1525	0.1288	0.1263	0.1484	0.1325	0.1452	0.1321	0.1323	0.1416			470.4	0.0596	0.0119	0.0957	0.0932
																														470.8	0.1144	0.092	0.0677	0.1521	0.1292	0.126	0.1479	0.1325	0.1445	0.1322	0.1325	0.1409			470.8	0.0585	0.0129	0.0949	0.0913
																														471.2	0.1141	0.0916	0.0672	0.1519	0.1292	0.1254	0.1478	0.1329	0.1448	0.1328	0.1312	0.1402			471.2	0.0589	0.0125	0.0946	0.0933
																														471.6	0.1143	0.0927	0.0672	0.152	0.1298	0.1256	0.1483	0.1349	0.1451	0.1323	0.1328	0.1405			471.6	0.058	0.0125	0.0948	0.0928
																														472	0.1139	0.0912	0.0676	0.1524	0.1296	0.1251	0.1472	0.1319	0.1444	0.1334	0.1317	0.1403			472	0.0584	0.0121	0.0941	0.0916
																														472.4	0.1149	0.0927	0.0668	0.1519	0.1291	0.1245	0.1466	0.1329	0.1435	0.1326	0.1331	0.14			472.4	0.0576	0.0123	0.0954	0.0925
																														472.8	0.1143	0.0919	0.0689	0.1522	0.1288	0.1258	0.1478	0.1326	0.1457	0.1323	0.1319	0.1414			472.8	0.0593	0.0137	0.0952	0.0931
																														473.2	0.1146	0.093	0.0686	0.1533	0.1293	0.1268	0.1489	0.1331	0.145	0.1334	0.1324	0.1419			473.2	0.0594	0.0131	0.0964	0.0927
																														473.6	0.1146	0.0919	0.0677	0.1515	0.13	0.125	0.1489	0.1325	0.1446	0.1328	0.1311	0.1411			473.6	0.0592	0.0134	0.0949	0.093
																														474	0.1149	0.0913	0.0678	0.1527	0.1294	0.1258	0.1473	0.1321	0.1447	0.1331	0.1316	0.1397			474	0.0587	0.0114	0.0947	0.0938
																														474.4	0.1148	0.092	0.0678	0.154	0.129	0.1253	0.1484	0.1329	0.1448	0.1337	0.1309	0.1403			474.4	0.0591	0.0131	0.0946	0.0927
																														474.8	0.1142	0.0924	0.0695	0.1522	0.13	0.1262	0.1479	0.1333	0.1451	0.1322	0.1328	0.1406			474.8	0.0583	0.0127	0.0961	0.0919
																														475.2	0.1143	0.0928	0.0681	0.1522	0.1306	0.1246	0.1471	0.1329	0.1446	0.1327	0.1324	0.1414			475.2	0.058	0.013	0.0959	0.0921
																														475.6	0.1158	0.0924	0.0675	0.1539	0.1315	0.1254	0.149	0.1345	0.1432	0.1322	0.133	0.1399			475.6	0.0596	0.0132	0.0941	0.0932
																														476	0.1136	0.0919	0.0686	0.1519	0.1289	0.1257	0.1477	0.1322	0.1455	0.1326	0.1329	0.1418			476	0.058	0.0117	0.0959	0.0926
																														476.4	0.1154	0.0931	0.0683	0.153	0.1295	0.1261	0.1493	0.1331	0.1456	0.1336	0.1334	0.1413			476.4	0.0595	0.0134	0.0962	0.0934
																														476.8	0.1146	0.0929	0.069	0.1525	0.1291	0.1258	0.1485	0.1323	0.1444	0.1326	0.1321	0.1415			476.8	0.0597	0.0132	0.096	0.093
																														477.2	0.1156	0.0919	0.0683	0.1533	0.1298	0.1253	0.149	0.1329	0.145	0.1331	0.1318	0.1405			477.2	0.0601	0.0129	0.0944	0.0929
																														477.6	0.1165	0.0927	0.0683	0.1534	0.1312	0.1255	0.148	0.1343	0.144	0.1331	0.1322	0.1401			477.6	0.0594	0.0127	0.0951	0.0931
																														478	0.1157	0.0912	0.069	0.1521	0.1293	0.1255	0.1481	0.1336	0.1448	0.1319	0.1321	0.1415			478	0.0593	0.0134	0.0946	0.093
																														478.4	0.1144	0.0929	0.0686	0.1513	0.1287	0.1257	0.1484	0.1329	0.1438	0.1317	0.1328	0.1415			478.4	0.0586	0.012	0.0959	0.093
																														478.8	0.1145	0.0931	0.0688	0.1526	0.129	0.1257	0.149	0.1339	0.1453	0.1325	0.133	0.1405			478.8	0.0599	0.0143	0.0961	0.0931
																														479.2	0.1141	0.0949	0.068	0.1522	0.1296	0.1249	0.147	0.1338	0.1429	0.1325	0.1324	0.1395			479.2	0.0595	0.014	0.0962	0.0924
																														479.6	0.1148	0.0932	0.0684	0.1528	0.1298	0.125	0.1469	0.1324	0.1452	0.1313	0.1328	0.1398			479.6	0.059	0.0125	0.0958	0.0929
																														480	0.1151	0.0939	0.0678	0.1512	0.1291	0.1244	0.1486	0.1339	0.1425	0.1329	0.1328	0.1396			480	0.0593	0.0132	0.0957	0.0934
																														480.4	0.1147	0.0922	0.0684	0.1521	0.1282	0.1255	0.1482	0.132	0.1452	0.1335	0.1311	0.1416			480.4	0.0601	0.0121	0.0965	0.0936
																														480.8	0.1155	0.0932	0.0694	0.1522	0.1295	0.1264	0.1479	0.1321	0.1452	0.1334	0.1322	0.1425			480.8	0.0595	0.0134	0.0969	0.0938
																														481.2	0.1154	0.0936	0.068	0.1526	0.1296	0.125	0.148	0.1331	0.143	0.1317	0.1329	0.1389			481.2	0.0586	0.0135	0.0952	0.0928
																														481.6	0.1154	0.0943	0.0689	0.154	0.1299	0.1269	0.1479	0.1325	0.146	0.1324	0.132	0.1415			481.6	0.0602	0.0131	0.0977	0.0932
																														482	0.1146	0.0925	0.0681	0.1526	0.1289	0.1252	0.1488	0.1337	0.1437	0.1328	0.132	0.1402			482	0.0597	0.0132	0.0949	0.0933
																														482.4	0.1154	0.0931	0.0688	0.1535	0.1295	0.1263	0.1478	0.1345	0.1452	0.1336	0.1329	0.1407			482.4	0.0601	0.0131	0.0958	0.0927
																														482.8	0.1144	0.0935	0.0682	0.1518	0.1291	0.1249	0.1476	0.1324	0.1439	0.1328	0.1325	0.1403			482.8	0.0591	0.0136	0.096	0.093
																														483.2	0.1142	0.0935	0.0691	0.1516	0.1304	0.1242	0.1464	0.1329	0.1442	0.1319	0.1315	0.141			483.2	0.0583	0.0139	0.096	0.0921
																														483.6	0.1151	0.0937	0.0695	0.1529	0.1291	0.1258	0.149	0.1335	0.1445	0.133	0.1323	0.1407			483.6	0.059	0.0133	0.0971	0.0938
																														484	0.115	0.0922	0.0674	0.1526	0.1284	0.1254	0.148	0.132	0.1439	0.1327	0.1299	0.1389			484	0.0592	0.0132	0.0952	0.0934
																														484.4	0.1147	0.0944	0.0691	0.1524	0.1302	0.1258	0.1479	0.1329	0.144	0.1328	0.1334	0.1413			484.4	0.0592	0.0143	0.0968	0.0921
																														484.8	0.116	0.0924	0.0688	0.1532	0.1291	0.126	0.1484	0.1325	0.1439	0.1336	0.1319	0.1407			484.8	0.0597	0.0127	0.0961	0.0933
																														485.2	0.1151	0.094	0.0692	0.1529	0.13	0.1261	0.1478	0.1332	0.1458	0.1334	0.1331	0.1418			485.2	0.0589	0.0127	0.0974	0.0925
																														485.6	0.1153	0.0938	0.0689	0.1531	0.1296	0.1249	0.1489	0.1325	0.1444	0.1325	0.1322	0.1404			485.6	0.0586	0.0128	0.0964	0.0938
																														486	0.1151	0.0947	0.0683	0.1533	0.1299	0.1256	0.1479	0.134	0.1429	0.1324	0.1336	0.1396			486	0.0599	0.0134	0.0961	0.0938
																														486.4	0.1155	0.0938	0.07	0.1529	0.1298	0.1268	0.1492	0.133	0.1463	0.1333	0.1331	0.1421			486.4	0.0599	0.0144	0.0968	0.0941
																														486.8	0.1149	0.0939	0.0687	0.1531	0.1294	0.1259	0.1471	0.132	0.1444	0.1331	0.133	0.1403			486.8	0.0588	0.0139	0.0969	0.0926
																														487.2	0.1162	0.093	0.0684	0.1538	0.129	0.1253	0.1484	0.1328	0.1437	0.1334	0.1318	0.1399			487.2	0.0602	0.013	0.0954	0.0935
																														487.6	0.1152	0.0939	0.0693	0.1527	0.129	0.1255	0.1477	0.1323	0.1439	0.1331	0.1316	0.1406			487.6	0.0598	0.013	0.0972	0.0937
																														488	0.1144	0.0947	0.0698	0.1527	0.1301	0.1258	0.1479	0.1344	0.1436	0.1329	0.1326	0.1405			488	0.0591	0.014	0.0968	0.0938
																														488.4	0.1161	0.0949	0.0697	0.1532	0.1301	0.1269	0.149	0.1329	0.1455	0.1335	0.1328	0.1412			488.4	0.0597	0.014	0.0977	0.0947
																														488.8	0.1156	0.0941	0.0685	0.1535	0.1307	0.1263	0.1482	0.1334	0.1443	0.1325	0.1326	0.1407			488.8	0.0602	0.013	0.0962	0.0939
																														489.2	0.1146	0.0931	0.0692	0.1525	0.1288	0.1266	0.1477	0.1314	0.1454	0.1322	0.1332	0.1408			489.2	0.06	0.013	0.0964	0.0928
																														489.6	0.116	0.0942	0.0696	0.1526	0.1305	0.1257	0.1476	0.1323	0.1446	0.132	0.132	0.1409			489.6	0.0586	0.0136	0.0971	0.0937
																														490	0.1149	0.094	0.0694	0.1519	0.1288	0.1259	0.1463	0.133	0.1447	0.1317	0.1321	0.1418			490	0.0588	0.0135	0.0972	0.0923
																														490.4	0.1148	0.0946	0.0686	0.1526	0.1291	0.1259	0.1497	0.1328	0.1436	0.1331	0.1311	0.1397			490.4	0.0602	0.0138	0.097	0.0936
																														490.8	0.1151	0.095	0.0701	0.1528	0.1304	0.1276	0.1482	0.1343	0.1454	0.1329	0.1327	0.1407			490.8	0.0604	0.0138	0.0975	0.0937
																														491.2	0.1156	0.0949	0.0694	0.1525	0.13	0.1257	0.1479	0.1335	0.1445	0.1325	0.1323	0.1408			491.2	0.0596	0.0133	0.0973	0.0929
																														491.6	0.116	0.0943	0.0691	0.1533	0.1289	0.1266	0.1487	0.1326	0.1444	0.1322	0.133	0.1408			491.6	0.0602	0.0131	0.0973	0.0936
																														492	0.1153	0.0954	0.0693	0.1515	0.1286	0.1265	0.1474	0.1328	0.1444	0.1326	0.1329	0.1412			492	0.0583	0.0132	0.0988	0.0928
																														492.4	0.1156	0.0945	0.0694	0.1525	0.1298	0.126	0.1484	0.1334	0.1438	0.1334	0.1328	0.1406			492.4	0.0599	0.0137	0.097	0.0937
																														492.8	0.1148	0.0943	0.0693	0.1527	0.13	0.1257	0.1487	0.1322	0.1441	0.1323	0.1328	0.1416			492.8	0.0596	0.014	0.0971	0.0942
																														493.2	0.1159	0.095	0.0695	0.1522	0.1302	0.1264	0.148	0.1335	0.144	0.133	0.135	0.1402			493.2	0.0594	0.014	0.0966	0.0938
																														493.6	0.1168	0.0937	0.0713	0.1526	0.1287	0.1267	0.1477	0.1318	0.1462	0.1331	0.1312	0.1421			493.6	0.0605	0.0119	0.0988	0.0936
																														494	0.1154	0.0947	0.0688	0.1511	0.1285	0.1259	0.1464	0.1331	0.1436	0.1315	0.1304	0.1401			494	0.0591	0.0132	0.0976	0.0928
																														494.4	0.116	0.0939	0.0701	0.1539	0.1297	0.1281	0.1482	0.1323	0.1452	0.1326	0.132	0.1419			494.4	0.0596	0.0139	0.0983	0.0935
																														494.8	0.1167	0.0933	0.069	0.1529	0.1295	0.1268	0.1479	0.1326	0.1439	0.1324	0.1324	0.1409			494.8	0.0593	0.0126	0.097	0.0934
																														495.2	0.1162	0.0947	0.0699	0.1532	0.1306	0.1265	0.1489	0.1338	0.1443	0.1331	0.1336	0.1408			495.2	0.061	0.0138	0.0974	0.0951
																														495.6	0.1153	0.0949	0.0698	0.1523	0.1291	0.1265	0.1483	0.1326	0.1443	0.1329	0.1322	0.1409			495.6	0.0598	0.013	0.0981	0.0938
																														496	0.1164	0.0958	0.0698	0.152	0.1303	0.1257	0.1476	0.1326	0.1442	0.1332	0.1325	0.1401			496	0.0603	0.0139	0.0975	0.0936
																														496.4	0.1158	0.0952	0.0695	0.1524	0.129	0.1259	0.1472	0.1324	0.1434	0.1327	0.1322	0.14			496.4	0.0603	0.0139	0.0977	0.0934
																														496.8	0.1151	0.0944	0.0696	0.1512	0.1301	0.1262	0.1475	0.1336	0.1446	0.1321	0.1325	0.1402			496.8	0.0593	0.0137	0.0964	0.0932
																														497.2	0.1159	0.0949	0.0693	0.1525	0.1302	0.1272	0.1485	0.1331	0.1438	0.1334	0.1316	0.1411			497.2	0.0602	0.0134	0.0981	0.0947
																														497.6	0.1163	0.0952	0.0694	0.1537	0.1308	0.1263	0.1487	0.1342	0.1437	0.133	0.1331	0.1416			497.6	0.061	0.0137	0.097	0.094
																														498	0.1155	0.0947	0.0687	0.152	0.129	0.1257	0.1477	0.1329	0.1446	0.1315	0.1316	0.1394			498	0.0593	0.0137	0.0971	0.094
																														498.4	0.1167	0.0954	0.0701	0.1525	0.1301	0.127	0.1482	0.1327	0.1445	0.1337	0.1333	0.1415			498.4	0.0605	0.0139	0.0986	0.0933
																														498.8	0.1169	0.0944	0.0696	0.1528	0.1291	0.1267	0.1485	0.1327	0.1437	0.1336	0.1316	0.1406			498.8	0.0612	0.0132	0.0973	0.0945
																														499.2	0.1174	0.0954	0.0703	0.1551	0.1307	0.1264	0.1487	0.1331	0.1441	0.1337	0.1329	0.1411			499.2	0.0607	0.0136	0.0978	0.0948
																														499.6	0.1163	0.0957	0.07	0.1526	0.1292	0.1274	0.1486	0.1333	0.1445	0.1334	0.1327	0.1422			499.6	0.0602	0.0133	0.0988	0.0943
																														500	0.1162	0.0953	0.0685	0.153	0.1302	0.1261	0.1477	0.1329	0.1447	0.1332	0.1327	0.1402			500	0.0601	0.0137	0.0978	0.0941
																														500.4	0.1162	0.095	0.0691	0.1517	0.1302	0.1256	0.1477	0.133	0.1432	0.1323	0.132	0.1406			500.4	0.0609	0.0142	0.0975	0.0938
																														500.8	0.1161	0.0942	0.0702	0.1527	0.1291	0.1277	0.1477	0.1326	0.1456	0.1323	0.1312	0.141			500.8	0.06	0.012	0.0986	0.0932
																														501.2	0.1156	0.0955	0.0686	0.1524	0.1294	0.1255	0.1479	0.1327	0.1433	0.1318	0.1333	0.1404			501.2	0.0597	0.0138	0.0977	0.0935
																														501.6	0.1168	0.0944	0.0699	0.1518	0.1306	0.1268	0.1481	0.1331	0.1446	0.1335	0.131	0.141			501.6	0.0597	0.0136	0.0977	0.0933
																														502	0.1166	0.0951	0.0696	0.153	0.13	0.1263	0.1474	0.1334	0.1438	0.1322	0.1326	0.1407			502	0.0602	0.0135	0.0976	0.0936
																														502.4	0.1171	0.0952	0.0693	0.1526	0.1292	0.1269	0.148	0.1318	0.1444	0.1336	0.1319	0.1401			502.4	0.0606	0.0136	0.0979	0.0949
																														502.8	0.1156	0.0958	0.0689	0.1522	0.1305	0.126	0.148	0.133	0.1437	0.1329	0.1337	0.1402			502.8	0.0599	0.0147	0.0975	0.0936
																														503.2	0.1167	0.0953	0.0683	0.153	0.1301	0.124	0.1475	0.1335	0.1432	0.1323	0.1318	0.1395			503.2	0.0599	0.0133	0.0968	0.0944
																														503.6	0.1184	0.095	0.0696	0.1535	0.1303	0.1259	0.148	0.1341	0.1426	0.1343	0.1315	0.1409			503.6	0.0608	0.014	0.0977	0.0944
																														504	0.1154	0.0958	0.0689	0.1526	0.1306	0.1264	0.1478	0.133	0.143	0.1327	0.1329	0.1403			504	0.0597	0.0141	0.0972	0.0938
																														504.4	0.1174	0.0955	0.0699	0.1525	0.1294	0.1269	0.1487	0.1321	0.1439	0.1343	0.1332	0.1413			504.4	0.0598	0.0135	0.0983	0.0948
																														504.8	0.1168	0.0965	0.0697	0.1528	0.1295	0.1259	0.1483	0.133	0.1431	0.1308	0.1327	0.1394			504.8	0.0597	0.0147	0.098	0.0941
																														505.2	0.1165	0.0957	0.0698	0.1533	0.1291	0.1262	0.1473	0.1327	0.1445	0.1315	0.1327	0.1412			505.2	0.0612	0.0135	0.0983	0.0941
																														505.6	0.1149	0.095	0.0712	0.1529	0.1292	0.127	0.1472	0.133	0.1454	0.1318	0.1325	0.1415			505.6	0.0595	0.0136	0.0985	0.093
																														506	0.1173	0.0961	0.0709	0.1539	0.1295	0.1252	0.1486	0.1325	0.1439	0.1332	0.1326	0.1417			506	0.0609	0.013	0.0988	0.0951
																														506.4	0.1161	0.0959	0.0704	0.152	0.1291	0.1284	0.1477	0.1339	0.1439	0.1337	0.1322	0.1405			506.4	0.0599	0.0143	0.0988	0.0942
																														506.8	0.1168	0.0959	0.069	0.153	0.129	0.1257	0.148	0.1327	0.1434	0.1337	0.1319	0.1396			506.8	0.0609	0.0126	0.0984	0.0942
																														507.2	0.1157	0.0965	0.0703	0.1513	0.1304	0.127	0.148	0.1335	0.1439	0.1321	0.1335	0.1403			507.2	0.0602	0.0149	0.0992	0.0937
																														507.6	0.1155	0.096	0.0693	0.1515	0.1289	0.1263	0.1481	0.1336	0.1441	0.1315	0.1326	0.1395			507.6	0.0595	0.0129	0.0984	0.0939
																														508	0.1169	0.0947	0.0704	0.1528	0.1286	0.1258	0.1479	0.1327	0.1447	0.1332	0.1299	0.1401			508	0.0597	0.0133	0.0981	0.0945
																														508.4	0.1173	0.096	0.0706	0.1525	0.1306	0.1268	0.1479	0.1332	0.1447	0.1332	0.1326	0.1408			508.4	0.0598	0.0146	0.0992	0.0935
																														508.8	0.1179	0.0963	0.0715	0.1526	0.13	0.1267	0.1476	0.1322	0.1431	0.1326	0.1327	0.141			508.8	0.0604	0.0145	0.0994	0.0942
																														509.2	0.1168	0.0975	0.0695	0.1524	0.1305	0.1268	0.1478	0.1347	0.1438	0.1333	0.1331	0.1409			509.2	0.0604	0.0142	0.0989	0.0944
																														509.6	0.1166	0.0963	0.0703	0.1525	0.1299	0.1265	0.1477	0.1328	0.1439	0.1334	0.1319	0.1403			509.6	0.0597	0.0143	0.0986	0.0945
																														510	0.1163	0.0966	0.0699	0.1522	0.1297	0.1274	0.1473	0.1333	0.1449	0.1323	0.1331	0.1408			510	0.0601	0.0146	0.0996	0.0939
																														510.4	0.1172	0.0962	0.0706	0.1524	0.1303	0.1275	0.148	0.1339	0.1451	0.1327	0.1315	0.1414			510.4	0.0608	0.0145	0.0991	0.0939
																														510.8	0.1173	0.097	0.0707	0.153	0.1287	0.1265	0.1484	0.1342	0.1435	0.1326	0.1344	0.1412			510.8	0.061	0.0149	0.0993	0.0934
																														511.2	0.1176	0.0963	0.0695	0.152	0.1296	0.126	0.1475	0.1322	0.1431	0.1339	0.1323	0.1407			511.2	0.0594	0.0146	0.0991	0.0944
																														511.6	0.1179	0.0961	0.0704	0.1531	0.1288	0.1267	0.148	0.132	0.1434	0.1328	0.1307	0.1407			511.6	0.0598	0.0131	0.0999	0.0941
																														512	0.1168	0.095	0.0705	0.1512	0.1288	0.1266	0.1477	0.1328	0.1431	0.133	0.1314	0.1399			512	0.0597	0.0133	0.0977	0.0943
																														512.4	0.1173	0.096	0.0703	0.1521	0.1283	0.1276	0.1478	0.1329	0.144	0.1331	0.1323	0.1404			512.4	0.0604	0.0132	0.0994	0.0935
																														512.8	0.1176	0.0969	0.0698	0.1524	0.1293	0.1262	0.148	0.1324	0.1443	0.1321	0.1326	0.1396			512.8	0.0615	0.0143	0.099	0.0934
																														513.2	0.1183	0.097	0.0709	0.1538	0.1301	0.1268	0.1478	0.1326	0.1447	0.133	0.1335	0.1403			513.2	0.0608	0.0143	0.0991	0.0946
																														513.6	0.1171	0.0975	0.0701	0.1533	0.1304	0.1268	0.1481	0.1319	0.1434	0.1319	0.1331	0.1407			513.6	0.0603	0.0147	0.0996	0.0944
																														514	0.1171	0.0969	0.07	0.1534	0.129	0.1266	0.1484	0.1328	0.1435	0.1328	0.1319	0.1399			514	0.0607	0.0136	0.0991	0.0941
																														514.4	0.1182	0.0967	0.0708	0.1538	0.1298	0.1274	0.1505	0.1337	0.1452	0.1332	0.1319	0.1406			514.4	0.061	0.0148	0.0993	0.0956
																														514.8	0.1169	0.0973	0.0703	0.1524	0.1307	0.1264	0.1482	0.1325	0.1436	0.1335	0.133	0.1386			514.8	0.0603	0.0148	0.0992	0.0952
																														515.2	0.1179	0.0965	0.0716	0.1525	0.1291	0.1277	0.1492	0.1325	0.1449	0.133	0.1319	0.1416			515.2	0.0612	0.0147	0.0997	0.0954
																														515.6	0.1182	0.0973	0.0707	0.1523	0.1293	0.1259	0.1483	0.133	0.1441	0.1328	0.1334	0.1419			515.6	0.0604	0.0143	0.0998	0.0939
																														516	0.1178	0.0964	0.0702	0.1525	0.129	0.1266	0.1475	0.1324	0.1436	0.1331	0.1312	0.1409			516	0.0608	0.014	0.0993	0.0954
																														516.4	0.1177	0.0964	0.0702	0.1537	0.1288	0.1264	0.1479	0.1333	0.1424	0.133	0.1317	0.1407			516.4	0.0602	0.0141	0.0994	0.0943
																														516.8	0.1168	0.097	0.0707	0.1516	0.1298	0.1269	0.1482	0.1342	0.1444	0.1334	0.1322	0.1411			516.8	0.0607	0.0151	0.0997	0.0947
																														517.2	0.1168	0.0958	0.071	0.1534	0.1295	0.1277	0.1494	0.1329	0.1446	0.1338	0.1332	0.14			517.2	0.0609	0.0138	0.0988	0.0956
																														517.6	0.1173	0.0963	0.0703	0.1528	0.1294	0.1261	0.1469	0.1318	0.1442	0.1331	0.1325	0.1403			517.6	0.0606	0.0139	0.0988	0.0938
																														518	0.1176	0.0976	0.0713	0.1518	0.1299	0.1269	0.1479	0.1335	0.1439	0.1327	0.1329	0.1409			518	0.0614	0.0145	0.0995	0.0937
																														518.4	0.1164	0.0977	0.07	0.1537	0.1302	0.127	0.1476	0.1329	0.1441	0.1335	0.1321	0.1413			518.4	0.0607	0.0141	0.1002	0.0938
																														518.8	0.1175	0.0966	0.0712	0.1532	0.1298	0.1272	0.1485	0.1341	0.1432	0.1324	0.1322	0.1405			518.8	0.0615	0.0145	0.0998	0.0937
																														519.2	0.1176	0.0967	0.0702	0.1533	0.1293	0.1254	0.1487	0.1334	0.1429	0.1338	0.1322	0.1403			519.2	0.0605	0.014	0.0992	0.0946
																														519.6	0.1185	0.0968	0.0701	0.1538	0.13	0.1276	0.148	0.1337	0.1438	0.1334	0.1323	0.1402			519.6	0.0614	0.0155	0.0991	0.0958
																														520	0.1167	0.0973	0.0713	0.151	0.1296	0.1267	0.1478	0.1332	0.1454	0.1321	0.1332	0.142			520	0.0592	0.0145	0.0996	0.0937
																														520.4	0.1173	0.0967	0.0707	0.1517	0.1302	0.1271	0.1474	0.1334	0.1441	0.1321	0.1324	0.1413			520.4	0.061	0.0142	0.0994	0.0948
																														520.8	0.1168	0.0976	0.0709	0.1531	0.1308	0.1255	0.1484	0.1337	0.1444	0.1328	0.1329	0.1411			520.8	0.0607	0.0161	0.0992	0.0943
																														521.2	0.1178	0.0961	0.0701	0.1534	0.1292	0.1266	0.1478	0.132	0.1426	0.1334	0.132	0.1391			521.2	0.0614	0.0136	0.0982	0.0949
																														521.6	0.1175	0.0963	0.07	0.1531	0.1289	0.1268	0.1483	0.1333	0.1438	0.1328	0.1329	0.1403			521.6	0.0613	0.0146	0.0988	0.0951
																														522	0.1182	0.0966	0.0709	0.153	0.1292	0.1269	0.1487	0.1331	0.1435	0.1343	0.1325	0.1397			522	0.0611	0.0135	0.0992	0.0949
																														522.4	0.1186	0.0971	0.0708	0.1534	0.1305	0.1278	0.1481	0.1316	0.1447	0.1326	0.1314	0.1413			522.4	0.0611	0.0129	0.1009	0.0955
																														522.8	0.118	0.097	0.0711	0.1514	0.1285	0.1269	0.1472	0.1315	0.1435	0.1321	0.1326	0.1407			522.8	0.0605	0.0144	0.0997	0.0938
																														523.2	0.118	0.0965	0.0713	0.1517	0.1289	0.1277	0.1474	0.1333	0.1449	0.133	0.1314	0.1403			523.2	0.0617	0.0139	0.1	0.0958
																														523.6	0.1179	0.0973	0.0711	0.153	0.1287	0.1262	0.1481	0.1332	0.1435	0.1339	0.1334	0.1399			523.6	0.0604	0.0141	0.0996	0.0946
																														524	0.1165	0.0968	0.0707	0.1532	0.1301	0.1264	0.1477	0.1321	0.1433	0.1323	0.1313	0.14			524	0.061	0.0147	0.0996	0.0949
																														524.4	0.1178	0.0977	0.0713	0.1533	0.1283	0.1273	0.1478	0.1328	0.1441	0.134	0.1318	0.1398			524.4	0.06	0.0142	0.1007	0.0938
																														524.8	0.1187	0.0979	0.0714	0.1521	0.1298	0.1271	0.1478	0.1337	0.1453	0.1335	0.131	0.1416			524.8	0.0616	0.0142	0.1015	0.095
																														525.2	0.1178	0.0971	0.0719	0.1536	0.1298	0.1271	0.1474	0.1325	0.1442	0.1325	0.1328	0.141			525.2	0.0612	0.0143	0.1001	0.0954
																														525.6	0.1173	0.0973	0.0726	0.1537	0.1285	0.127	0.1482	0.1315	0.1447	0.1338	0.1314	0.1403			525.6	0.0616	0.0144	0.1002	0.0952
																														526	0.1178	0.097	0.0718	0.1509	0.1302	0.1267	0.148	0.1326	0.1434	0.1318	0.1326	0.1405			526	0.0607	0.0141	0.0995	0.0952
																														526.4	0.118	0.0969	0.0709	0.1534	0.1291	0.1274	0.1476	0.1318	0.1431	0.133	0.1316	0.1415			526.4	0.0624	0.0137	0.0999	0.0958
																														526.8	0.1188	0.0979	0.0709	0.153	0.1295	0.1278	0.1486	0.1333	0.1437	0.1331	0.1326	0.1407			526.8	0.0608	0.0156	0.1003	0.0953
																														527.2	0.1187	0.0988	0.0718	0.1539	0.1303	0.1273	0.1475	0.1341	0.1444	0.1345	0.1331	0.1409			527.2	0.0618	0.0158	0.1011	0.0957
																														527.6	0.1177	0.0973	0.0715	0.1522	0.1293	0.1273	0.1479	0.1328	0.1449	0.132	0.1324	0.141			527.6	0.0613	0.0147	0.0998	0.0945
																														528	0.118	0.0988	0.0717	0.1533	0.1295	0.1277	0.1478	0.1329	0.1448	0.1341	0.1328	0.1407			528	0.0618	0.014	0.1018	0.0962
																														528.4	0.1188	0.0971	0.0707	0.1528	0.1303	0.126	0.1494	0.1322	0.1433	0.1331	0.1315	0.1399			528.4	0.0633	0.0141	0.0994	0.0957
																														528.8	0.1172	0.0984	0.0715	0.1525	0.129	0.1273	0.147	0.1337	0.1436	0.1316	0.1327	0.1409			528.8	0.0609	0.0147	0.1007	0.0952
																														529.2	0.1191	0.097	0.0715	0.1542	0.1293	0.1274	0.1482	0.132	0.1432	0.1335	0.1312	0.1408			529.2	0.0621	0.0151	0.1003	0.0953
																														529.6	0.1179	0.0982	0.0708	0.1516	0.1292	0.1271	0.1475	0.1332	0.1437	0.1328	0.133	0.1404			529.6	0.0599	0.0145	0.1006	0.0941
																														530	0.1184	0.0981	0.0712	0.1536	0.1303	0.1271	0.1483	0.1329	0.1443	0.1341	0.1325	0.1408			530	0.0624	0.0148	0.1004	0.0953
																														530.4	0.1182	0.0975	0.0717	0.1528	0.1294	0.1252	0.1493	0.1324	0.1435	0.1329	0.133	0.1403			530.4	0.0619	0.0142	0.1002	0.0949
																														530.8	0.1193	0.0988	0.0707	0.1534	0.1316	0.1268	0.1485	0.133	0.1435	0.1342	0.1335	0.1404			530.8	0.0622	0.0161	0.1002	0.095
																														531.2	0.1179	0.0974	0.0719	0.1533	0.129	0.1271	0.1488	0.1316	0.1439	0.1332	0.1316	0.1399			531.2	0.0616	0.015	0.1006	0.0953
																														531.6	0.1189	0.099	0.0705	0.1527	0.1304	0.1277	0.1488	0.1336	0.1437	0.133	0.1321	0.1399			531.6	0.0621	0.0151	0.1009	0.0955
																														532	0.1177	0.0985	0.0717	0.1517	0.1299	0.1267	0.1469	0.1329	0.1438	0.132	0.1325	0.1403			532	0.061	0.014	0.1007	0.0947
																														532.4	0.1171	0.0981	0.0716	0.1511	0.1297	0.1277	0.1477	0.1332	0.144	0.1316	0.1321	0.1412			532.4	0.06	0.0146	0.1008	0.0946
																														532.8	0.1186	0.0987	0.0708	0.153	0.1288	0.1265	0.1493	0.1324	0.1436	0.134	0.1319	0.1392			532.8	0.0619	0.0148	0.1008	0.095
																														533.2	0.1187	0.0993	0.0715	0.1529	0.1306	0.1272	0.1489	0.1329	0.1448	0.1328	0.1328	0.1407			533.2	0.0609	0.0158	0.1015	0.0957
																														533.6	0.1185	0.0982	0.0717	0.1533	0.1288	0.128	0.1472	0.1334	0.1432	0.1335	0.1325	0.1397			533.6	0.0615	0.014	0.1009	0.0946
																														534	0.1187	0.0979	0.0719	0.1534	0.1282	0.1276	0.1494	0.1325	0.1433	0.1325	0.1324	0.1401			534	0.062	0.0136	0.1008	0.0943
																														534.4	0.1181	0.0979	0.0711	0.1532	0.13	0.1275	0.148	0.1323	0.1436	0.1329	0.1328	0.1402			534.4	0.0619	0.0141	0.1003	0.0952
																														534.8	0.1182	0.098	0.0719	0.1513	0.1291	0.1283	0.148	0.1321	0.1448	0.1331	0.1334	0.1418			534.8	0.0611	0.0144	0.1011	0.0943
																														535.2	0.1193	0.0984	0.0714	0.1546	0.13	0.1261	0.1494	0.1338	0.1434	0.1342	0.1324	0.141			535.2	0.0629	0.0145	0.101	0.0961
																														535.6	0.1193	0.0991	0.0715	0.153	0.1305	0.1273	0.1473	0.1336	0.1439	0.1337	0.133	0.1408			535.6	0.0615	0.0156	0.1009	0.0953
																														536	0.1202	0.099	0.0715	0.1539	0.1297	0.1267	0.1483	0.1333	0.1428	0.1328	0.1328	0.1404			536	0.0616	0.0141	0.1012	0.0964
																														536.4	0.1187	0.0976	0.0715	0.1533	0.1287	0.1275	0.1486	0.1314	0.1437	0.1328	0.1323	0.1398			536.4	0.0623	0.0145	0.1	0.0953
																														536.8	0.1187	0.0986	0.0712	0.154	0.1296	0.1271	0.1484	0.1325	0.1431	0.1334	0.1316	0.141			536.8	0.0611	0.0143	0.1014	0.096
																														537.2	0.1189	0.0987	0.0709	0.1541	0.1296	0.1258	0.1465	0.1331	0.1432	0.1329	0.132	0.1393			537.2	0.0613	0.0152	0.1005	0.0954
																														537.6	0.118	0.0983	0.072	0.1519	0.1296	0.127	0.148	0.1332	0.1429	0.1331	0.1317	0.1412			537.6	0.0618	0.0149	0.1008	0.0949
																														538	0.1199	0.0991	0.0722	0.1542	0.1289	0.1275	0.1494	0.1336	0.1441	0.1353	0.1323	0.1407			538	0.0632	0.0145	0.1018	0.0963
																														538.4	0.1179	0.0992	0.0728	0.1513	0.131	0.1282	0.1476	0.1337	0.1438	0.1326	0.1334	0.1412			538.4	0.0605	0.0157	0.1015	0.0943
																														538.8	0.1185	0.0988	0.0726	0.153	0.1302	0.1276	0.1473	0.1331	0.1442	0.1328	0.1334	0.1402			538.8	0.0616	0.0155	0.1014	0.0945
																														539.2	0.1194	0.0975	0.0716	0.1538	0.1292	0.128	0.1489	0.1315	0.1432	0.1327	0.1314	0.141			539.2	0.0619	0.0154	0.1002	0.0961
																														539.6	0.1191	0.0993	0.0727	0.1528	0.1303	0.1274	0.1484	0.1335	0.1441	0.1326	0.1329	0.1404			539.6	0.0616	0.0155	0.1017	0.096
																														540	0.1191	0.0987	0.0714	0.1525	0.1282	0.1267	0.1489	0.1328	0.1427	0.1327	0.1321	0.1409			540	0.0618	0.0138	0.1017	0.0958
																														540.4	0.1187	0.0984	0.0722	0.1532	0.1298	0.1274	0.1487	0.133	0.1446	0.1326	0.132	0.1408			540.4	0.0617	0.0148	0.1012	0.0951
																														540.8	0.1186	0.0993	0.0717	0.1527	0.13	0.1269	0.148	0.1331	0.1432	0.134	0.1331	0.1398			540.8	0.0623	0.0149	0.101	0.0952
																														541.2	0.1183	0.098	0.0726	0.1528	0.1296	0.1277	0.1492	0.1314	0.1441	0.1325	0.132	0.1395			541.2	0.062	0.0148	0.1007	0.096
																														541.6	0.1199	0.0981	0.0719	0.1536	0.1284	0.1283	0.1481	0.1328	0.1429	0.133	0.1316	0.1402			541.6	0.0625	0.0146	0.1009	0.0957
																														542	0.1191	0.1	0.0717	0.1527	0.1299	0.1274	0.1488	0.133	0.1442	0.1331	0.1329	0.141			542	0.0624	0.015	0.102	0.0964
																														542.4	0.1196	0.0994	0.0721	0.1542	0.1299	0.128	0.1481	0.1333	0.1426	0.1328	0.1325	0.1409			542.4	0.0615	0.0155	0.1022	0.0956
																														542.8	0.1193	0.0998	0.0719	0.153	0.1302	0.1271	0.1481	0.1338	0.1433	0.1341	0.1332	0.1404			542.8	0.063	0.0155	0.1013	0.096
																														543.2	0.1198	0.0987	0.0726	0.153	0.1292	0.1271	0.1479	0.1341	0.1437	0.1327	0.1325	0.1399			543.2	0.0619	0.0152	0.1011	0.0955
																														543.6	0.1186	0.0988	0.071	0.153	0.1296	0.1284	0.1482	0.1326	0.1442	0.1338	0.1317	0.1402			543.6	0.0615	0.014	0.1014	0.0965
																														544	0.1193	0.0998	0.0724	0.1534	0.1298	0.1266	0.1495	0.1322	0.1438	0.1346	0.1331	0.1403			544	0.0633	0.0152	0.1022	0.0972
																														544.4	0.1192	0.0992	0.0726	0.1544	0.1285	0.1281	0.1483	0.132	0.1438	0.1342	0.1318	0.1407			544.4	0.0629	0.0153	0.1022	0.0954
																														544.8	0.1192	0.0998	0.0724	0.1539	0.1307	0.1271	0.1489	0.1328	0.1435	0.1335	0.1333	0.1401			544.8	0.0624	0.0158	0.1018	0.0952
																														545.2	0.1192	0.1002	0.0711	0.153	0.1299	0.1269	0.1483	0.134	0.1428	0.1329	0.1339	0.1406			545.2	0.0619	0.0159	0.1016	0.0952
																														545.6	0.1196	0.0992	0.0722	0.1534	0.1295	0.1277	0.1481	0.1344	0.1428	0.1337	0.1332	0.1401			545.6	0.0622	0.0156	0.1012	0.0966
																														546	0.1192	0.0992	0.0724	0.1524	0.1286	0.1275	0.1476	0.1331	0.1441	0.1329	0.1319	0.141			546	0.0614	0.0139	0.1024	0.0954
																														546.4	0.1187	0.0994	0.0734	0.1533	0.1292	0.1292	0.1484	0.1327	0.144	0.1325	0.1321	0.1405			546.4	0.0621	0.015	0.1025	0.0952
																														546.8	0.1182	0.0996	0.0724	0.1518	0.1292	0.1275	0.1476	0.1337	0.1435	0.1322	0.1332	0.1401			546.8	0.0617	0.0151	0.1015	0.0958
																														547.2	0.1182	0.0984	0.0715	0.1525	0.1298	0.1278	0.1474	0.1323	0.1426	0.1321	0.1317	0.1395			547.2	0.0619	0.0152	0.1008	0.095
																														547.6	0.1201	0.1005	0.0727	0.1522	0.1299	0.1275	0.1477	0.1325	0.143	0.1327	0.1327	0.141			547.6	0.0616	0.0151	0.1027	0.095
																														548	0.1194	0.0992	0.072	0.154	0.1283	0.1284	0.1474	0.1328	0.1444	0.1337	0.1311	0.1407			548	0.0625	0.0147	0.1022	0.0967
																														548.4	0.1206	0.0993	0.0728	0.1547	0.129	0.1285	0.1496	0.1317	0.143	0.1341	0.1324	0.1403			548.4	0.0631	0.0148	0.1022	0.0965
																														548.8	0.1188	0.0997	0.0734	0.1532	0.1302	0.1284	0.1483	0.1327	0.1444	0.1322	0.1318	0.1404			548.8	0.062	0.0154	0.1028	0.0964
																														549.2	0.1192	0.0995	0.0727	0.1526	0.1297	0.1281	0.1476	0.1345	0.1439	0.1323	0.1315	0.1396			549.2	0.062	0.0153	0.1022	0.095
																														549.6	0.1201	0.0994	0.073	0.1531	0.1307	0.1277	0.1481	0.1337	0.1443	0.1332	0.1326	0.141			549.6	0.0625	0.0156	0.1018	0.0953
																														550	0.1198	0.0986	0.0719	0.1538	0.129	0.1275	0.148	0.1325	0.1433	0.1337	0.1319	0.1399			550	0.0624	0.0142	0.1013	0.0959
																														550.4	0.1197	0.1012	0.0719	0.1526	0.1296	0.1271	0.1481	0.134	0.1433	0.133	0.1319	0.1398			550.4	0.0626	0.0158	0.1028	0.0969
																														550.8	0.119	0.1004	0.0721	0.1526	0.1307	0.1268	0.1478	0.1348	0.1431	0.1336	0.1324	0.1395			550.8	0.0613	0.0165	0.1015	0.096
																														551.2	0.1198	0.0994	0.0729	0.1538	0.1287	0.1283	0.1494	0.1321	0.1435	0.1321	0.1322	0.1409			551.2	0.0626	0.0157	0.1029	0.0954
																														551.6	0.1186	0.0999	0.0724	0.1528	0.1317	0.1279	0.1476	0.134	0.1436	0.1328	0.1336	0.1402			551.6	0.0619	0.0156	0.1019	0.0958
																														552	0.1192	0.1002	0.0725	0.1529	0.1297	0.1278	0.1497	0.1341	0.1446	0.1337	0.1319	0.1413			552	0.0617	0.0156	0.1024	0.0952
																														552.4	0.1188	0.1004	0.0719	0.1531	0.1291	0.1268	0.1457	0.1334	0.1435	0.1333	0.133	0.1413			552.4	0.0626	0.0152	0.1024	0.0956
																														552.8	0.1201	0.0996	0.0726	0.1529	0.129	0.1281	0.1482	0.133	0.1436	0.1339	0.1321	0.141			552.8	0.0622	0.0155	0.1021	0.0965
																														553.2	0.1192	0.1	0.0729	0.1522	0.1291	0.1268	0.1481	0.1327	0.1435	0.1331	0.1329	0.1401			553.2	0.0613	0.0142	0.103	0.0958
																														553.6	0.1187	0.0994	0.0734	0.1533	0.1291	0.1292	0.148	0.1337	0.1442	0.132	0.1329	0.1416			553.6	0.0615	0.0156	0.1022	0.0956
																														554	0.1196	0.0994	0.0725	0.153	0.1294	0.1278	0.148	0.1336	0.1418	0.1337	0.1328	0.1399			554	0.0619	0.0157	0.1013	0.0963
																														554.4	0.1191	0.0997	0.0729	0.1532	0.1293	0.1283	0.1476	0.1323	0.1436	0.1324	0.1325	0.1404			554.4	0.0618	0.0159	0.1021	0.0954
																														554.8	0.1214	0.1015	0.0731	0.1539	0.1299	0.1273	0.1476	0.1339	0.1429	0.1344	0.1322	0.1406			554.8	0.0632	0.0151	0.103	0.097
																														555.2	0.1195	0.0983	0.072	0.1537	0.1281	0.1281	0.1486	0.1315	0.1429	0.1326	0.1316	0.1388			555.2	0.062	0.0151	0.1012	0.0963
																														555.6	0.12	0.0995	0.0722	0.152	0.1303	0.1276	0.1483	0.1323	0.1424	0.1325	0.1316	0.1403			555.6	0.0626	0.0151	0.102	0.0953
																														556	0.1187	0.1004	0.0729	0.153	0.1296	0.1279	0.1477	0.1325	0.1431	0.1319	0.1322	0.1403			556	0.0622	0.016	0.1027	0.0952
																														556.4	0.1194	0.1006	0.0725	0.1517	0.1292	0.1284	0.147	0.1334	0.1428	0.1321	0.1319	0.1389			556.4	0.0608	0.015	0.1023	0.0946
																														556.8	0.12	0.1014	0.0728	0.1534	0.1299	0.1277	0.1474	0.1333	0.1432	0.134	0.1326	0.1401			556.8	0.0628	0.0163	0.1035	0.095
																														557.2	0.1199	0.0998	0.0726	0.1529	0.1281	0.1275	0.1475	0.1316	0.1433	0.1315	0.1321	0.1394			557.2	0.0614	0.0146	0.1027	0.0958
																														557.6	0.1193	0.1013	0.071	0.1527	0.13	0.1271	0.1485	0.1332	0.142	0.1331	0.133	0.1405			557.6	0.0625	0.0165	0.1021	0.0969
																														558	0.1193	0.1004	0.0725	0.1525	0.1304	0.1284	0.1488	0.1324	0.1439	0.1319	0.1311	0.1405			558	0.0624	0.0154	0.1029	0.0967
																														558.4	0.1193	0.1006	0.0729	0.1522	0.1302	0.1283	0.1467	0.1333	0.1432	0.1322	0.1327	0.1413			558.4	0.0614	0.0156	0.1028	0.0947
																														558.8	0.1204	0.1015	0.0724	0.1529	0.1302	0.1278	0.1483	0.1333	0.1439	0.1331	0.1335	0.1398			558.8	0.0641	0.0172	0.1028	0.0971
																														559.2	0.1186	0.1006	0.0728	0.1525	0.1291	0.1279	0.1469	0.133	0.1441	0.1323	0.132	0.1402			559.2	0.0615	0.0159	0.1032	0.0949
																														559.6	0.1205	0.1006	0.0726	0.1534	0.1305	0.1275	0.1488	0.1332	0.1431	0.1331	0.1332	0.1409			559.6	0.0628	0.0158	0.1022	0.0963
																														560	0.1195	0.0994	0.0727	0.1528	0.1289	0.1273	0.1478	0.1323	0.1432	0.1334	0.1315	0.1392			560	0.0619	0.0148	0.102	0.0969
																														560.4	0.1185	0.1003	0.0736	0.153	0.1295	0.1287	0.1482	0.1327	0.1442	0.1337	0.1319	0.1411			560.4	0.0618	0.0153	0.1031	0.096
																														560.8	0.1188	0.1011	0.0733	0.1518	0.1298	0.1286	0.1483	0.1333	0.1431	0.1327	0.133	0.1398			560.8	0.062	0.0162	0.1032	0.0961
																														561.2	0.1207	0.1011	0.0724	0.1525	0.1292	0.1273	0.1481	0.135	0.1428	0.1336	0.1329	0.1398			561.2	0.063	0.017	0.1026	0.0966
																														561.6	0.1199	0.1014	0.0734	0.1523	0.1299	0.1285	0.1468	0.1332	0.1441	0.1325	0.1331	0.1412			561.6	0.0622	0.0161	0.1037	0.0964
																														562	0.1192	0.1015	0.0732	0.1531	0.1295	0.1285	0.1481	0.1338	0.1441	0.1325	0.134	0.1406			562	0.0626	0.0157	0.1039	0.0964
																														562.4	0.1207	0.0997	0.0734	0.1538	0.13	0.1276	0.1487	0.1325	0.1434	0.1329	0.1326	0.1405			562.4	0.0624	0.0151	0.102	0.0971
																														562.8	0.1194	0.1016	0.0732	0.1539	0.1302	0.1281	0.1479	0.1331	0.1431	0.1324	0.1326	0.1408			562.8	0.0614	0.0164	0.1035	0.0956
																														563.2	0.1199	0.1012	0.073	0.1529	0.1292	0.1277	0.1489	0.1324	0.1431	0.1315	0.1318	0.1396			563.2	0.0628	0.0162	0.1031	0.0963
																														563.6	0.1193	0.1016	0.0733	0.153	0.1298	0.1287	0.1473	0.133	0.1434	0.133	0.1319	0.14			563.6	0.0631	0.0164	0.1038	0.0974
																														564	0.1202	0.1004	0.0736	0.1524	0.1294	0.1285	0.1477	0.1329	0.1434	0.134	0.132	0.1412			564	0.0627	0.0149	0.1038	0.0958
																														564.4	0.1211	0.1003	0.0731	0.1544	0.1299	0.1269	0.1495	0.1318	0.1423	0.1345	0.132	0.1404			564.4	0.0634	0.0152	0.1023	0.0976
																														564.8	0.12	0.1004	0.073	0.1516	0.1298	0.1275	0.1488	0.1323	0.1441	0.1331	0.1314	0.1399			564.8	0.0632	0.0158	0.1027	0.0971
																														565.2	0.1202	0.1017	0.0729	0.1525	0.1292	0.1274	0.1482	0.1341	0.1427	0.1328	0.1325	0.1398			565.2	0.0626	0.0165	0.1031	0.0971
																														565.6	0.1201	0.1018	0.0731	0.1524	0.1298	0.1283	0.1471	0.133	0.1426	0.1329	0.1329	0.1405			565.6	0.0629	0.0158	0.1041	0.0961
																														566	0.1219	0.102	0.0735	0.1555	0.13	0.1272	0.1493	0.1339	0.1441	0.1334	0.1327	0.1411			566	0.0626	0.0168	0.1041	0.0968
																														566.4	0.1209	0.1016	0.0729	0.1527	0.1301	0.1287	0.148	0.1332	0.143	0.1344	0.133	0.1408			566.4	0.0629	0.0156	0.1036	0.0972
																														566.8	0.1204	0.1011	0.0732	0.1536	0.1288	0.1276	0.1482	0.1315	0.1442	0.1337	0.1322	0.1399			566.8	0.0628	0.0155	0.1039	0.0967
																														567.2	0.1197	0.101	0.0728	0.152	0.1288	0.1279	0.1479	0.1322	0.1428	0.1333	0.1314	0.1405			567.2	0.0625	0.0144	0.1042	0.0963
																														567.6	0.1207	0.1023	0.0732	0.1525	0.1296	0.1268	0.1474	0.1332	0.1436	0.133	0.1319	0.1413			567.6	0.0622	0.0171	0.104	0.0966
																														568	0.1203	0.1019	0.073	0.1525	0.1299	0.1273	0.1483	0.1343	0.143	0.1328	0.1349	0.1396			568	0.062	0.0164	0.1038	0.0954
																														568.4	0.1203	0.1019	0.0735	0.1542	0.1301	0.128	0.1488	0.1334	0.1426	0.1325	0.1332	0.1404			568.4	0.0623	0.0168	0.1038	0.0952
																														568.8	0.1189	0.1014	0.0735	0.1536	0.1293	0.1282	0.1476	0.1333	0.1426	0.1333	0.1329	0.1399			568.8	0.0623	0.0166	0.1034	0.0958
																														569.2	0.1202	0.1013	0.0742	0.1541	0.1299	0.1277	0.149	0.1329	0.1437	0.1345	0.1322	0.1408			569.2	0.0627	0.0163	0.1034	0.0969
																														569.6	0.1213	0.1012	0.0732	0.1538	0.1279	0.1285	0.1478	0.132	0.1437	0.1333	0.1329	0.1408			569.6	0.0635	0.0155	0.1042	0.0976
																														570	0.1206	0.1024	0.0722	0.1532	0.1311	0.1276	0.1468	0.1341	0.1431	0.1328	0.1334	0.1402			570	0.0633	0.017	0.1031	0.0966
																														570.4	0.1201	0.1009	0.0732	0.1538	0.1287	0.1278	0.148	0.1332	0.1436	0.134	0.1335	0.1409			570.4	0.0635	0.0162	0.1033	0.0975
																														570.8	0.1207	0.1028	0.0742	0.1532	0.131	0.1283	0.1477	0.1336	0.1439	0.133	0.1335	0.1409			570.8	0.0624	0.0161	0.1045	0.0958
																														571.2	0.121	0.1	0.0745	0.1542	0.1281	0.1289	0.1493	0.1319	0.1433	0.1339	0.1317	0.1404			571.2	0.0634	0.0146	0.1035	0.0975
																														571.6	0.12	0.1018	0.0741	0.1535	0.1306	0.1281	0.1482	0.1325	0.1431	0.134	0.1332	0.1395			571.6	0.0634	0.0159	0.1037	0.0968
																														572	0.121	0.1007	0.0739	0.1537	0.129	0.1284	0.1493	0.1329	0.1424	0.1338	0.1318	0.1401			572	0.0635	0.0161	0.1032	0.0967
																														572.4	0.12	0.1031	0.075	0.1524	0.1304	0.1288	0.1465	0.1337	0.1438	0.1323	0.1331	0.1413			572.4	0.0614	0.0166	0.1059	0.0956
																														572.8	0.1212	0.1029	0.0738	0.1538	0.1301	0.1285	0.1487	0.1341	0.143	0.134	0.1332	0.1408			572.8	0.0632	0.0165	0.1044	0.0964
																														573.2	0.1205	0.1013	0.0731	0.1525	0.1295	0.1283	0.1478	0.1323	0.1434	0.1328	0.1328	0.1401			573.2	0.0629	0.0159	0.1029	0.0957
																														573.6	0.1201	0.1007	0.0737	0.1526	0.1289	0.1279	0.1482	0.1325	0.1427	0.1327	0.1311	0.1402			573.6	0.063	0.0162	0.1035	0.0968
																														574	0.1198	0.1025	0.0737	0.1517	0.1296	0.1279	0.1469	0.1325	0.1421	0.1325	0.1332	0.1406			574	0.0622	0.0165	0.1041	0.0968
																														574.4	0.1201	0.1015	0.0748	0.1527	0.13	0.1282	0.1465	0.133	0.1436	0.1316	0.133	0.1415			574.4	0.0628	0.017	0.1046	0.0968
																														574.8	0.1207	0.1023	0.0745	0.1532	0.1307	0.128	0.1486	0.1338	0.1436	0.1334	0.1337	0.1405			574.8	0.0632	0.0164	0.1039	0.0973
																														575.2	0.1211	0.1016	0.0739	0.1539	0.1303	0.1289	0.1475	0.1321	0.1439	0.1334	0.1317	0.1403			575.2	0.0624	0.015	0.1044	0.0965
																														575.6	0.1206	0.1013	0.0736	0.1528	0.1295	0.1288	0.1483	0.1329	0.1439	0.133	0.1325	0.1408			575.6	0.0635	0.0165	0.1039	0.0973
																														576	0.1208	0.1017	0.0744	0.1528	0.1287	0.1289	0.148	0.1316	0.1436	0.1333	0.1329	0.1406			576	0.063	0.0153	0.1051	0.0966
																														576.4	0.1203	0.1014	0.0734	0.1528	0.1292	0.1287	0.148	0.1329	0.1436	0.1327	0.1329	0.1393			576.4	0.063	0.0162	0.1034	0.096
																														576.8	0.121	0.1022	0.0742	0.1526	0.1298	0.128	0.1474	0.1331	0.1428	0.132	0.1334	0.14			576.8	0.0625	0.0165	0.1047	0.0966
																														577.2	0.1208	0.1017	0.0736	0.1526	0.1293	0.1294	0.147	0.1323	0.1436	0.1328	0.1325	0.1411			577.2	0.062	0.0162	0.1045	0.0961
																														577.6	0.1211	0.1026	0.0737	0.1535	0.1299	0.1284	0.1482	0.1331	0.1426	0.1329	0.1324	0.1402			577.6	0.0632	0.0168	0.104	0.0976
																														578	0.1207	0.101	0.0731	0.1538	0.1294	0.1273	0.1483	0.1315	0.1441	0.1332	0.1315	0.141			578	0.0634	0.0158	0.1036	0.0961
																														578.4	0.1212	0.1026	0.0736	0.1535	0.1301	0.1276	0.1479	0.1339	0.142	0.1338	0.1332	0.1399			578.4	0.0624	0.0166	0.1037	0.0962
																														578.8	0.1206	0.1024	0.0746	0.154	0.1304	0.1293	0.1492	0.133	0.1437	0.1352	0.1327	0.1408			578.8	0.064	0.0169	0.1048	0.097
																														579.2	0.1205	0.1036	0.0748	0.1533	0.1306	0.1284	0.1477	0.1338	0.1434	0.1327	0.1333	0.1399			579.2	0.063	0.0176	0.1049	0.0954
																														579.6	0.1205	0.1023	0.0741	0.1529	0.1305	0.1289	0.1472	0.1331	0.1436	0.1329	0.1329	0.1408			579.6	0.0625	0.0173	0.1046	0.0962
																														580	0.1219	0.1014	0.0726	0.1539	0.1284	0.1282	0.15	0.1318	0.1423	0.1339	0.1315	0.1397			580	0.0636	0.0154	0.1036	0.0975
																														580.4	0.1207	0.102	0.0735	0.1531	0.1297	0.1275	0.1486	0.1324	0.1439	0.1327	0.1326	0.1392			580.4	0.0628	0.0165	0.104	0.0974
																														580.8	0.1212	0.1024	0.074	0.1537	0.1291	0.1275	0.1487	0.1337	0.1423	0.1337	0.132	0.14			580.8	0.0627	0.0163	0.1043	0.0967
																														581.2	0.1215	0.103	0.0753	0.1541	0.1296	0.1298	0.1491	0.1337	0.1432	0.134	0.1339	0.1403			581.2	0.0644	0.0166	0.1048	0.0975
																														581.6	0.1208	0.1018	0.0747	0.1535	0.1298	0.1286	0.1483	0.1324	0.1427	0.132	0.1317	0.1394			581.6	0.0626	0.0165	0.104	0.0972
																														582	0.1206	0.1028	0.0743	0.1531	0.1297	0.1283	0.1479	0.1335	0.1444	0.1331	0.1332	0.1407			582	0.0637	0.0165	0.1048	0.0972
																														582.4	0.1212	0.1016	0.0739	0.153	0.129	0.1288	0.1481	0.1327	0.1437	0.1337	0.1312	0.1403			582.4	0.0636	0.0162	0.1044	0.0966
																														582.8	0.1201	0.1027	0.0747	0.154	0.1304	0.1281	0.1488	0.1334	0.1439	0.1327	0.1331	0.14			582.8	0.0628	0.0159	0.1048	0.0969
																														583.2	0.1197	0.1021	0.0733	0.1522	0.1296	0.1288	0.1483	0.1333	0.143	0.1331	0.1328	0.1397			583.2	0.0614	0.0172	0.1036	0.0963
																														583.6	0.1214	0.1019	0.075	0.1537	0.129	0.1292	0.1477	0.1316	0.1437	0.1335	0.1322	0.1403			583.6	0.0628	0.0156	0.1051	0.0957
																														584	0.1215	0.1025	0.0749	0.1533	0.1305	0.1288	0.1482	0.1334	0.1428	0.1335	0.1324	0.1412			584	0.0632	0.0172	0.1044	0.0973
																														584.4	0.1199	0.1024	0.0748	0.1525	0.13	0.128	0.1468	0.1328	0.1444	0.1322	0.1328	0.14			584.4	0.0618	0.0165	0.1044	0.0953
																														584.8	0.1225	0.1027	0.0738	0.1534	0.1302	0.128	0.1487	0.1337	0.1425	0.1337	0.1333	0.1398			584.8	0.0638	0.0167	0.1041	0.0978
																														585.2	0.1214	0.1018	0.0738	0.1526	0.1297	0.128	0.1487	0.1334	0.1435	0.1326	0.1327	0.1399			585.2	0.0637	0.0162	0.1038	0.0965
																														585.6	0.1217	0.1025	0.0742	0.1536	0.1309	0.1297	0.1483	0.1325	0.1428	0.133	0.1321	0.1404			585.6	0.0629	0.017	0.1045	0.0982
																														586	0.1206	0.1028	0.0757	0.1525	0.13	0.1295	0.1469	0.1343	0.1457	0.1328	0.1327	0.141			586	0.063	0.0169	0.1056	0.0971
																														586.4	0.1211	0.103	0.0744	0.1524	0.13	0.1276	0.147	0.1336	0.1428	0.1336	0.1325	0.1392			586.4	0.063	0.0162	0.1047	0.0971
																														586.8	0.1218	0.102	0.0756	0.1542	0.1291	0.1291	0.1478	0.1328	0.1452	0.133	0.1331	0.141			586.8	0.0641	0.0158	0.1052	0.097
																														587.2	0.1216	0.1017	0.0742	0.1532	0.1303	0.1281	0.1481	0.1323	0.1433	0.1335	0.1331	0.1405			587.2	0.0644	0.0158	0.1043	0.0969
																														587.6	0.1209	0.1033	0.0737	0.1528	0.1299	0.1274	0.1486	0.1327	0.1442	0.1331	0.1329	0.1413			587.6	0.0637	0.0176	0.1045	0.098
																														588	0.1202	0.103	0.0743	0.1517	0.1292	0.13	0.1477	0.1333	0.1433	0.1333	0.1328	0.1411			588	0.062	0.0172	0.1054	0.0962
																														588.4	0.1209	0.1029	0.0738	0.1527	0.1303	0.1282	0.1474	0.1332	0.1425	0.1324	0.1326	0.1402			588.4	0.0628	0.0176	0.1038	0.0967
																														588.8	0.1212	0.1018	0.0747	0.1532	0.1291	0.1293	0.1473	0.1327	0.1433	0.1343	0.1319	0.1407			588.8	0.0637	0.0165	0.1049	0.0973
																														589.2	0.122	0.1032	0.0739	0.1545	0.1306	0.1285	0.1487	0.1349	0.1426	0.1338	0.1336	0.1401			589.2	0.0644	0.0182	0.104	0.0975
																														589.6	0.1208	0.1034	0.0741	0.1537	0.1304	0.1283	0.1478	0.1328	0.1433	0.1333	0.133	0.1393			589.6	0.0642	0.0174	0.1051	0.0971
																														590	0.1214	0.103	0.0747	0.1529	0.1295	0.1286	0.1481	0.1328	0.1434	0.1328	0.1325	0.1408			590	0.0628	0.017	0.1051	0.0967
																														590.4	0.121	0.1032	0.0745	0.1526	0.1293	0.1288	0.1484	0.1332	0.1447	0.1323	0.1318	0.1405			590.4	0.0637	0.0161	0.1057	0.0961
																														590.8	0.1212	0.1033	0.0752	0.1531	0.1298	0.1292	0.1484	0.1334	0.1432	0.1326	0.1317	0.1402			590.8	0.0622	0.0172	0.1051	0.097
																														591.2	0.1217	0.1032	0.0749	0.1527	0.1303	0.1295	0.1486	0.1328	0.1428	0.1343	0.1338	0.1406			591.2	0.0643	0.0166	0.1054	0.0972
																														591.6	0.1229	0.1026	0.0747	0.1527	0.1303	0.1284	0.1481	0.1333	0.1428	0.1338	0.1321	0.1393			591.6	0.0639	0.0167	0.1051	0.0976
																														592	0.1222	0.1042	0.0751	0.1536	0.1304	0.129	0.1481	0.1344	0.143	0.1336	0.133	0.1399			592	0.0645	0.0178	0.1056	0.0986
																														592.4	0.1218	0.1029	0.0749	0.1535	0.1292	0.1297	0.148	0.1331	0.1437	0.1322	0.1334	0.1401			592.4	0.0632	0.0164	0.1054	0.0969
																														592.8	0.1211	0.1035	0.0741	0.1534	0.13	0.1286	0.148	0.1333	0.1424	0.1332	0.1324	0.1397			592.8	0.0635	0.0172	0.1051	0.0973
																														593.2	0.1216	0.1032	0.076	0.1536	0.1293	0.1296	0.1482	0.1329	0.1442	0.1342	0.1324	0.1418			593.2	0.0643	0.0171	0.106	0.0978
																														593.6	0.1219	0.1028	0.074	0.1523	0.1291	0.1283	0.1471	0.1323	0.1433	0.1328	0.1324	0.1399			593.6	0.063	0.0157	0.1053	0.0961
																														594	0.1213	0.1029	0.0752	0.1534	0.1301	0.1283	0.1478	0.1325	0.1426	0.1332	0.1321	0.1395			594	0.0639	0.0169	0.1052	0.0975
																														594.4	0.122	0.1027	0.0747	0.1528	0.1291	0.1277	0.1476	0.1318	0.1431	0.1333	0.1317	0.1395			594.4	0.0646	0.016	0.1053	0.0972
																														594.8	0.1218	0.1029	0.0753	0.1531	0.1305	0.1282	0.1481	0.1348	0.1441	0.1341	0.133	0.1402			594.8	0.063	0.0173	0.1043	0.0977
																														595.2	0.1217	0.1022	0.0745	0.153	0.1286	0.1289	0.1469	0.1334	0.1433	0.1327	0.1313	0.1406			595.2	0.0645	0.0154	0.1046	0.097
																														595.6	0.1215	0.1039	0.076	0.1525	0.1319	0.1287	0.1475	0.1345	0.1437	0.1331	0.1334	0.1406			595.6	0.0623	0.0178	0.106	0.097
																														596	0.1222	0.1038	0.075	0.1533	0.1297	0.1293	0.1478	0.1333	0.1427	0.1335	0.1321	0.1404			596	0.0639	0.0178	0.1056	0.0976
																														596.4	0.1227	0.1034	0.0752	0.1529	0.1288	0.1292	0.1471	0.1325	0.1431	0.1347	0.1319	0.1397			596.4	0.0637	0.0157	0.1059	0.0974
																														596.8	0.1213	0.1025	0.0737	0.1537	0.1295	0.1278	0.1477	0.1335	0.1432	0.1325	0.133	0.139			596.8	0.0635	0.0171	0.1039	0.0975
																														597.2	0.1205	0.1029	0.0745	0.1529	0.1292	0.1283	0.1474	0.1325	0.142	0.133	0.1324	0.1396			597.2	0.063	0.0169	0.1049	0.0977
																														597.6	0.1214	0.1033	0.0743	0.1529	0.1309	0.1292	0.1487	0.1329	0.1433	0.1327	0.1336	0.1405			597.6	0.0629	0.0177	0.1054	0.0963
																														598	0.1219	0.1048	0.0747	0.1539	0.1304	0.1285	0.1477	0.1335	0.1421	0.1332	0.1329	0.139			598	0.0636	0.0175	0.1057	0.0973
																														598.4	0.1222	0.1036	0.0753	0.1539	0.1294	0.1287	0.1481	0.1336	0.1429	0.1323	0.1324	0.1393			598.4	0.063	0.0172	0.105	0.0975
																														598.8	0.1232	0.1035	0.0752	0.1545	0.1305	0.1285	0.1487	0.1322	0.1437	0.1335	0.1325	0.1397			598.8	0.0634	0.0165	0.1055	0.0967
																														599.2	0.1217	0.1032	0.0749	0.1535	0.1305	0.1278	0.1488	0.1328	0.1434	0.1333	0.1328	0.1405			599.2	0.0642	0.017	0.1045	0.0988
																														599.6	0.1208	0.104	0.0752	0.1525	0.1301	0.1288	0.148	0.1332	0.143	0.1325	0.1323	0.1411			599.6	0.0633	0.0172	0.1058	0.0966
																														600	0.1216	0.1033	0.0759	0.1535	0.131	0.1288	0.1481	0.1334	0.1437	0.1329	0.1325	0.1413			600	0.0634	0.0179	0.1053	0.0968
[truncated: 21 more columns]
