# Supplementary material for: Autophagosome membrane expansion is mediated by the N-terminus and cis-membrane association of human ATG8s
Source: eLife journal article supplement (doi:10.7554/elife.89185), 2023-06-08
Supplement: fig5-data1 [file Source data for Fig.5.xlsx]

## Sheet: Figure 5
Figure 5B																					Figure 5C																					Figure 5D
	LC3B S3CNBD KQL-3E Relative fluorecence intensity (normalised to no ATP)																					LC3B S3CNBD RRR-3E Relative fluorecence intensity (normalised to no ATP)																					GABARAP K2CNBD ARI-3E Relative fluorecence intensity (normalised to no ATP)
Time (sec)	All			no ATG7			no ATG3			no E3			no ATP			no liposome					Time (sec)	All			no ATG7			no ATG3			no E3			no ATP			no liposome					Time (sec)	All			no ATG7			no ATG3
	R1	R2	R3	R1	R2	R3	R1	R2	R3	R1	R2	R3	R1	R2	R3	R1	R2	R3				R1	R2	R3	R1	R2	R3	R1	R2	R3	R1	R2	R3	R1	R2	R3	R1	R2	R3				R1	R2	R3	R1	R2	R3	R1
0	0	0	0	0	0	0	0	0	0	0	0	0	0	0	0	0	0	0			0	0	0	0	0	0	0	0	0	0	0	0	0	0	0	0	0	0	0			0	0	0	0	0	0	0	0
20	-2.082	1.175	-2.032	-0.365	2.477	-2.753	2.682	1.31	-1.092	3.459	1.233	-2.204	0	0	0	0.488	3.345	1.168			20	-0.787	1.663	-1.073	-1.937	0.79	0.169	-1.445	-0.552	1.531	-0.951	-1.552	-1.106	0	0	0	-0.214	-2.048	0.952			20	-3.62	-3.576	-1.545	0.503	-1.249	1.198	1.175
30	-1.02	2.017	-0.767	1.933	4.468	-2.902	5.545	2.211	-2.235	5.756	0.826	-4.555	0	0	0	4.196	4.526	1.904			30	0.291	1.018	-0.029	-0.286	1.53	-2.436	-1.464	-2.112	-0.193	-0.099	-2.288	-1.84	0	0	0	0.631	-2.374	1.806			30	-3.114	-0.693	-4.393	4.857	2.598	-2.057	5.88
40	-0.453	5.294	-1.956	3.914	7.572	-5.887	6.161	4.256	-6.889	7.262	2.382	-4.153	0	0	0	6.502	10.647	3.346			40	1.443	1.501	-0.157	0.551	0.963	-3.306	-1.282	-0.804	-1.52	1.593	-2.422	-1.978	0	0	0	1.38	-0.954	2.272			40	-6.772	-3.306	-2.398	2.916	-0.138	1.861	1.659
50	0.765	3.764	-7.685	4.473	7.045	-9.363	7.128	3.855	-10.182	8.777	0.427	-7.605	0	0	0	7.453	10.366	0.219			50	2.87	2.729	-0.939	1.779	1.728	-3.15	-1.63	-0.793	0.649	0.985	-2.4	1.316	0	0	0	2.795	-1.141	3.975			50	-10.014	-0.239	-3.49	3.663	2.454	-1.508	2.409
60	-3.125	4.702	-5.345	5.08	8.407	-7.334	5.543	4.447	-9.107	9.28	0.289	-7.679	0	0	0	8.29	11.606	3.141			60	1.99	2.335	-0.654	1.237	1.115	-2.514	-1.212	-1.412	1.395	1.298	-3.141	0.936	0	0	0	2.381	-1.706	4.504			60	-12.481	-2.146	-5.986	3.35	2.503	-2.001	2.668
70	0.673	7.026	-2.56	7.853	9.185	-6.783	7.628	5.656	-9.113	10.249	0.842	-6.177	0	0	0	9.221	14.567	5.983			70	1.742	0.915	0.298	1.033	-0.803	-2.627	-1.124	-1.595	0.924	1.067	-5.221	2.192	0	0	0	2.849	-2.758	4.707			70	-13.485	-4.914	-4.566	3.187	1.675	0.267	2.862
80	-0.34	5.764	-4.537	5.315	10.13	-5.054	5.407	6.139	-8.388	11.323	0.965	-7.575	0	0	0	10.172	13.35	7.189			80	1.032	2.602	-0.304	-0.05	0.531	-2.277	-2.362	-1.399	3.409	1.14	-4.429	1.098	0	0	0	1.88	-2.431	6.347			80	-14.26	-2.133	-5.589	5.072	5.136	-0.255	3.983
90	0.399	6.582	-4.365	6.023	10.861	-5.363	6.643	6.674	-11.254	10.648	1.053	-5.719	0	0	0	12.465	14.565	5.045			90	1.7	1.787	-2.913	0.71	0.165	-5.388	-2.262	-1.301	-0.715	0.849	-4.023	-0.262	0	0	0	2.434	-2.102	5.388			90	-16.424	-1.362	-1.635	4.939	6.463	1.836	5.329
100	-0.645	5.658	-7.292	7.281	10.709	-8.85	7.727	6.328	-13.816	11.762	0.579	-9.227	0	0	0	12.538	14.563	3.738			100	2.43	1.785	-1.283	1.716	0.257	-4.022	-1.514	-1.096	0.843	1.338	-3.497	0.049	0	0	0	3.847	-2.219	6.23			100	-15.574	-1.241	-4.206	5.526	6.569	1.194	4.724
110	-0.265	7.036	-6.888	7.066	11.621	-7.51	7.278	7.757	-12.894	11.836	1.493	-6.755	0	0	0	13.015	15.738	5.322			110	2.953	1.668	-0.363	3.761	0.336	-4.399	0.007	-1.442	2.348	2.423	-3.864	1.806	0	0	0	4.324	-3.553	6.162			110	-15.314	-4.79	-5.348	4.219	3.65	0.707	4.667
120	0.036	7.337	-4.555	7.798	11.724	-5.657	6.714	7.027	-10.85	12.615	1.589	-7.697	0	0	0	13.974	15.298	6.125			120	1.801	2.079	-1.695	1.226	0.428	-3.092	-1.393	-1.064	2.842	2.118	-4.134	0.949	0	0	0	4.384	-2.089	6.691			120	-14.844	-3.877	-4.038	6.072	6.242	2.363	5.341
130	1.322	7.666	-6.479	7.763	12.937	-7.654	7.255	8.418	-12.969	13.384	2.554	-7.498	0	0	0	14.688	16.397	5.873			130	2.843	2.081	-3.625	3.471	0.419	-5.638	-0.268	-1.019	-0.482	2.025	-3.604	-1.073	0	0	0	5.913	-2.608	4.811			130	-15.52	-2.561	-4.371	6.759	8.108	2.267	5.859
140	-0.29	5.254	-6.72	9.003	12.218	-7.971	8.383	8.497	-13.39	13.807	1.449	-7.856	0	0	0	14.881	15.621	5.649			140	2.779	4.359	-4.047	2.694	2.05	-4.631	-0.857	0.329	0.657	2.263	-4.03	-1.03	0	0	0	5.434	-1.308	5.516			140	-15.45	-2.427	-4.036	7.331	6.453	3.89	6.141
150	-1.881	7.527	-4.821	8.788	13.158	-7.473	6.459	8.582	-12.999	14.061	2.188	-7.038	0	0	0	13.574	16.469	8.237			150	1.093	3.216	-1.159	1.372	0.728	-4.438	-2.194	-0.696	0.688	1.012	-4.387	0.855	0	0	0	3.731	-2.724	6.317			150	-15.381	-2.221	-2.968	6.81	8.359	5.725	6.036
160	-0.034	7.014	-6.87	8.696	12.976	-6.894	8.771	8.919	-13.442	14.239	1.294	-7.492	0	0	0	16.922	16.141	7.336			160	1.834	2.783	-2.101	1.866	0.285	-2.664	-2.006	-0.606	0.788	1.37	-4.204	0.189	0	0	0	5	-2.588	6.781			160	-14.214	-0.814	-5.516	7.663	9.493	3.653	7.95
170	0.702	7.323	-7.655	10.023	13.388	-7.188	7.887	8.206	-13.983	14.336	1.653	-7.614	0	0	0	15.583	16.333	6.442			170	0.726	2.684	-0.871	0.903	0.695	-4.497	-1.733	-0.002	1.212	1.456	-4.047	0.763	0	0	0	4.86	-2.445	7.512			170	-14.881	-1.774	-3.548	7.971	8.995	3.837	7.074
180	-0.09	8.343	-8.03	8.795	14.619	-6.945	7.44	9.451	-12.693	12.474	3.34	-6.568	0	0	0	16.29	18.041	7.563			180	2.718	3.374	-2.911	2.22	0.782	-6.143	-1.344	0.816	-0.18	1.903	-3.418	-1.381	0	0	0	5.74	-2.186	6.532			180	-13.816	-1.108	-5.148	7.757	7.084	3.812	5.054
190	-1.765	8.499	-7.085	8.599	14.217	-7.594	7.84	9.073	-15.078	14.073	2.93	-8.784	0	0	0	14.835	17.162	7.445			190	3.288	2.61	-3.112	3.199	-0.769	-7.455	-0.992	0.66	0.144	2.392	-3.818	-1.238	0	0	0	4.855	-2.491	5.368			190	-13.28	-3.597	-4.585	8.868	9.592	6.291	7.293
200	1.514	8.155	-8.971	9.054	12.788	-7.86	7.607	7.572	-14.779	14.238	2.525	-7.104	0	0	0	16.402	17.323	6.185			200	3.909	1.333	-2.74	2.944	0.338	-5.028	-0.876	-1.055	1.045	2.415	-3.966	0.716	0	0	0	6.005	-2.693	7.097			200	-13.45	-2.648	-5.301	8.356	8.175	5.689	8.344
210	-1.36	9.2	-7.836	7.683	15.986	-7.123	7.619	9.866	-11.845	14.869	3.502	-6.686	0	0	0	16.67	18.983	9.542			210	2.917	2.987	-2.536	3.99	0.771	-3.582	-0.956	-0.021	1.353	2.164	-3.648	-0.546	0	0	0	5.983	-2.238	7.365			210	-14.53	-3.383	-8.031	6.847	7.863	4.064	8.335
220	-0.032	8.636	-9.361	7.368	15.272	-6.212	8.132	10.141	-13.86	14.902	3.252	-6.451	0	0	0	16.989	20.21	8.609			220	1.843	2.599	-4.085	3.389	0.115	-4.862	-0.733	0.317	0.106	2.172	-4.234	-0.502	0	0	0	6.361	-3.009	7.323			220	-14.657	0.55	-4.472	8.97	11.856	7.563	7.231
230	-2.152	9.41	-7.195	8.855	15.55	-6.748	8.247	10.981	-12.878	15.819	3.456	-8.179	0	0	0	16.395	20.416	8.482			230	2.73	3.031	-1.808	2.079	1.085	-3.491	-1.097	0.272	2.565	2.172	-3.67	1.273	0	0	0	6.838	-2.784	8.623			230	-12.079	-2.849	-7.078	10.047	9.929	5.972	9.436
240	-0.82	9.51	-8.039	9.146	14.934	-5.148	8.033	9.903	-14.284	15.156	3.181	-4.833	0	0	0	19.062	19.196	9.148			240	3.404	2.978	-4.003	3.645	0.364	-5.58	0.825	-0.779	0.122	2.791	-3.975	-1.092	0	0	0	7.281	-3.415	7.736			240	-12.933	-0.633	-8.425	9.82	11.086	5.436	9.128
250	-0.383	8.755	-8.024	9.661	14.02	-6.142	9.431	8.926	-13.043	15.919	2.506	-5.564	0	0	0	18.502	19.285	9.474			250	2.669	3.735	-2.487	3.144	0.399	-3.072	-0.848	-0.35	2.792	2.26	-4.181	-0.402	0	0	0	7.354	-2.644	7.846			250	-13.718	-2.629	-7.13	10.542	8.598	6.974	7.8
260	1.173	10.012	-9.701	9.483	15.029	-6.687	10.135	10.415	-13.506	17.097	3.401	-7.198	0	0	0	20.108	20.129	7.251			260	2.459	3.813	-3.616	3.05	-0.977	-3.966	-1.228	0.181	1.653	2.229	-4.094	-1.025	0	0	0	7.099	-2.463	8.221			260	-11.691	1.759	-4.954	10.38	11.819	9.32	9.312
270	-0.156	9.864	-8.947	9.478	16.741	-7.232	8.919	9.992	-15.744	15.742	3.076	-8.895	0	0	0	19.18	21.361	8.623			270	3.616	4.446	-3.234	3.965	1.886	-4.738	-0.282	1.978	1.301	3.554	-3.792	-0.033	0	0	0	7.785	-1.803	7.945			270	-11.264	0.287	-9.092	10.49	12.174	7.26	9.984
280	-0.451	10.137	-8.389	10.203	15.55	-7.191	8.392	10.432	-14.51	15.871	3.684	-7.785	0	0	0	19.132	19.952	8.596			280	3.452	3.227	-4.936	4.219	0.907	-7.294	-0.438	1.016	-1.026	3.124	-3.553	-1.145	0	0	0	9.132	-3.075	7.433			280	-10.868	-0.556	-9.836	10.636	11.554	7.704	9.733
290	0.15	10.293	-8.469	9.607	16.005	-7.747	8.816	10.316	-16.053	15.428	3.843	-7.522	0	0	0	19.822	19.636	8.039			290	3.983	2.863	-3.256	5.868	0.499	-5.53	0.226	0.731	1.035	4.707	-3.681	-1.064	0	0	0	8.439	-2.351	7.969			290	-10.943	-1.327	-7.832	11.415	14.017	8.88	10.189
300	1.505	10.821	-8.989	11.433	16.34	-5.094	9.449	11.066	-12.494	16.158	3.905	-5.076	0	0	0	19.932	19.623	11.142			300	3.663	2.603	-4.259	4.363	0.337	-4.62	0.685	0.81	0.312	4.603	-3.864	-0.108	0	0	0	9.774	-4.335	7.683			300	-7.629	-0.205	-6.94	12.823	12.425	9.817	12.169
310	0.045	10.957	-8.556	9.952	15.986	-6.312	9.381	10.695	-13.919	16.451	3.472	-6.614	0	0	0	20.095	19.879	9.942			310	3.899	3.163	-3.506	4.179	0.737	-5.143	-0.084	0.418	1.812	3.55	-3.67	-0.741	0	0	0	8.718	-2.982	8.309			310	-9.702	-2.704	-9.239	11.577	11.789	8.629	10.255
320	1.675	11.65	-7.724	11.557	16.763	-5.542	9.773	12.057	-11.356	17.054	4.842	-5.425	0	0	0	20.037	20.796	10.704			320	3.562	3.231	-1.512	4.52	1.53	-3.637	1.603	0.578	3.1	3.601	-3.933	0.694	0	0	0	10.241	-3.706	8.698			320	-10.062	0.431	-10.322	10.032	13.195	7.537	10.837
330	-0.106	11.527	-10.614	10.274	15.177	-7.981	9.579	11.368	-15.242	18.518	4.735	-7.906	0	0	0	20.864	20.905	8.658			330	4.717	3.558	-3.16	4.101	1.174	-3.293	-0.067	0.303	2.224	4.31	-3.39	-0.689	0	0	0	8.826	-2.793	8.751			330	-10.291	-0.419	-8.836	11.277	13.309	9.238	11.782
340	0.736	9.935	-7.219	9.643	16.735	-4.13	9.124	12.089	-13.25	16.706	4.825	-4.457	0	0	0	21.883	21.096	10.633			340	3.988	4.087	-4.646	5.338	1.164	-5.818	1.755	1.212	1.618	4.556	-3.857	-0.623	0	0	0	9.483	-3.252	9.027			340	-9.461	2.649	-6.58	11.371	13.51	11.125	8.873
350	0.014	10.483	-9.087	10.241	16.193	-5.707	9.101	11.129	-14.022	16.753	4.078	-6.474	0	0	0	20.834	20.122	10.2			350	3.481	4.074	-4.723	3.895	1.619	-4.899	-0.091	2.046	1.905	3.126	-3.577	-0.466	0	0	0	8.905	-3.282	8.713			350	-9.169	0.908	-6.979	11.832	14.264	10.798	10.848
360	-1.539	10.171	-8.554	8.939	14.941	-6.436	7.787	10.338	-13.086	17.09	3.14	-7.005	0	0	0	20.249	17.98	11.631			360	3.912	4.271	-3.869	5.272	1.546	-7.116	0.003	1.752	1.162	3.322	-3.807	-2.564	0	0	0	10.135	-2.81	8.285			360	-8.678	-1.3	-9.294	12.766	13.526	10.505	12.095
370	-2.602	10.998	-9.214	8.214	15.543	-5.939	7.012	10.826	-14.013	14.995	3.214	-6.702	0	0	0	19.777	20.146	10.808			370	3.827	4.101	-3.716	3.549	1.376	-4.309	-0.903	1.341	2.858	2.572	-3.882	-1.499	0	0	0	8.368	-3.313	9.484			370	-8.266	2.328	-11.351	13.132	15.843	10.619	12.218
380	0.54	10.927	-9.201	10.594	15.767	-5.591	8.6	11.194	-13.758	16.119	3.691	-6.176	0	0	0	22.678	21.856	11.509			380	4.09	4.163	-4.455	5.001	2.03	-6.424	0.111	2.397	2.085	5.047	-3.637	-0.923	0	0	0	11.134	-2.473	7.836			380	-8.544	-0.515	-7.711	12.775	13.706	13.254	12.189
390	1.491	11.663	-9.456	12.153	16.465	-5.622	11.038	11.454	-14.389	17.998	4.108	-6.867	0	0	0	24.427	21.577	10.849			390	3.916	4.079	-3.365	5.122	0.803	-4.967	0.463	2.381	2.668	3.889	-3.234	-0.688	0	0	0	10.168	-2.756	9.28			390	-7.13	-0.872	-9.758	12.942	13.27	10.106	12.475
400	-0.495	13.206	-9.639	11.459	16.42	-5.806	9.246	11.482	-12.434	18.485	6.28	-6.692	0	0	0	22.355	24.032	11.786			400	5.334	3.63	-2.544	5.592	1.952	-4.066	1.872	0.936	3.346	4.41	-4.812	-0.189	0	0	0	10.96	-2.874	8.862			400	-6.958	-2.063	-9.044	13.627	12.24	10.17	12.307
410	-0.265	12.226	-9.219	11.135	17.167	-5.717	9.893	12.32	-12.914	17.419	5.153	-5.975	0	0	0	22.459	22.641	12.342			410	4.182	3.559	-5.071	5.147	1.472	-6.508	1.193	1.616	1.234	5.382	-4.188	-0.88	0	0	0	11.005	-3.643	7.733			410	-3.753	0.432	-10.961	16.276	14.831	10.283	14.774
420	0.053	12.177	-8.969	11.013	16.736	-5.826	9.725	11.889	-13.348	18.461	4.87	-5.65	0	0	0	23.491	21.589	11.91			420	3.68	4.349	-2.857	4.787	2.073	-5.335	1.273	1.898	2.302	3.748	-3.608	-0.098	0	0	0	10.401	-3.453	9.144			420	-6.459	1.371	-8.274	13.757	16.23	13.606	13.176
430	-0.396	11.949	-9.763	11.169	16.505	-5.313	9.749	11.979	-13.783	18.154	4.773	-6.003	0	0	0	23.155	21.525	11.642			430	4.264	4.579	-5.054	5.202	2.245	-5.15	0.902	1.987	2.576	4.188	-2.933	-0.573	0	0	0	11.096	-2.767	9.251			430	-6.54	0.831	-8.649	14.13	15.219	13.449	12.778
440	-2.359	11.879	-10.008	9.272	16.52	-7.364	9.397	11.76	-13.837	17.599	4.629	-7.269	0	0	0	21.887	21.478	11.856			440	2.438	4.116	-2.501	4.814	1.835	-5.202	-0.896	2.232	4.558	3.803	-3.518	0.068	0	0	0	10.348	-3.423	9.092			440	-6.392	2.205	-8.996	12.437	17.053	13.481	11.999
450	0.974	11.051	-10.575	12.076	16.006	-5.724	9.673	11.944	-13.643	18.26	4.154	-6.278	0	0	0	23.913	21.611	11.747			450	5.41	5.026	-3.48	5.282	2.348	-5.1	0.762	2.516	2.672	4.234	-3.246	0.33	0	0	0	11.44	-3.275	9.084			450	-6.595	0.222	-8.964	14.681	15.772	12.839	13.395
460	-1.693	12.084	-10.002	10.154	17.227	-5.019	8.764	12.509	-11.309	18.643	5.369	-6.101	0	0	0	23.083	22.151	13.67			460	3.273	4.655	-2.502	5.128	1.339	-4.862	-0.303	2.669	3.351	3.862	-3.459	0.63	0	0	0	10.263	-3.07	9.257			460	-6.663	0.222	-8.528	14.379	16.074	14.604	12.972
470	-0.521	13.958	-10.089	11.578	19.299	-4.517	9.295	12.379	-13.338	17.651	5.444	-6.071	0	0	0	25.192	24.606	12.297			470	3.965	3.465	-4.708	4.641	2.23	-5.368	0.134	3.313	3.379	4.129	-4.276	-0.537	0	0	0	10.975	-3.055	9.811			470	-7.49	0.425	-9.803	14.161	15.958	12.483	12.539
480	-1.466	13.251	-10.419	12.178	17.9	-6.216	11.365	12.623	-15.15	20.117	5.569	-7.902	0	0	0	25.368	23.606	12.657			480	4.307	4.687	-4.135	4.403	2.401	-6.828	-0.463	4.283	2.475	4.493	-3.178	-1.031	0	0	0	11.423	-3.036	9.504			480	-5.496	-0.697	-10.973	16.028	16.142	14.205	13.608
490	0.196	13.062	-10.744	10.411	18.088	-2.776	11.066	13.052	-13.529	17.998	5.408	-5.07	0	0	0	25.577	22.953	12.873			490	4.354	4.715	-3.705	6.6	2.675	-5.844	0.917	4.073	4.04	4.655	-3.068	0.09	0	0	0	11.755	-3.052	9.838			490	-7.105	0.466	-9.459	13.961	16.743	14.579	11.803
500	-0.657	13.068	-10.473	11.221	18.422	-3.257	10.17	12.83	-12.595	18.982	5.514	-5.722	0	0	0	25.173	23.99	13.31			500	4.069	4.491	-3.992	5.745	2.698	-4.588	1.028	3.975	4.246	4.321	-3.491	0.017	0	0	0	12.137	-3.376	9.321			500	-5.412	-0.933	-9.921	14.649	16.95	15.088	12.698
510	-0.454	13.094	-10.724	10.233	18.594	-5.288	10.773	12.951	-12.802	18.466	5.782	-5.596	0	0	0	23.999	24.848	12.437			510	3.361	4.949	-5.327	5.557	2.95	-5.451	1.189	4.212	2.767	3.428	-3.253	-1.261	0	0	0	11.632	-3.445	9.253			510	-5.432	0.902	-8.001	14.923	17.717	16.581	12.838
520	-2.468	13.062	-11.315	10.635	17.978	-4.01	9.555	12.847	-13.718	18.658	5.699	-7.72	0	0	0	24.335	24.07	12.68			520	4.337	5.239	-4.193	5.703	3.618	-5.481	0.677	4.048	3.283	4.307	-3.304	-1.566	0	0	0	12.237	-3.301	9.41			520	-4.853	1.053	-9.437	14.962	17.336	15.858	12.879
530	0.437	12.652	-11.497	11.227	15.767	-2.88	11.719	12.471	-12.218	18.955	5.623	-6.227	0	0	0	24.835	23.685	14.263			530	4.614	5.092	-5.36	5.496	3.872	-5.329	0.142	2.548	3.46	3.556	-3.093	-2.251	0	0	0	12.321	-3.206	8.621			530	-5.969	-0.49	-10.03	15.19	17.283	16.503	13.095
540	-1.102	11.969	-11.088	11.232	17.641	-3.401	11.074	12.626	-12.925	18.617	4.288	-6.105	0	0	0	25.098	23.478	13.685			540	4.628	4.87	-4.813	6.879	3.939	-5.593	2.008	3.694	4.013	4.747	-3.3	-1.481	0	0	0	12.693	-3.556	8.997			540	-5	-0.178	-8.425	15.619	17.27	16.467	14.629
550	0.566	12.306	-12.235	12.371	15.955	-2.759	10.696	13.06	-11.724	19.222	4.993	-5.731	0	0	0	27.01	23.642	14.649			550	4.18	4.736	-4.41	6.698	4.101	-5.755	2.137	4.301	2.274	5.423	-2.998	-1.445	0	0	0	13.259	-3.377	7.662			550	-5.136	0.387	-8.34	15.599	17.074	15.15	11.315
560	-1.039	13.545	-11.96	11.844	18.411	-3.55	10.864	13.565	-13.116	19.592	6.036	-6.114	0	0	0	26.191	24.166	13.567			560	4.394	4.72	-4.745	5.866	4.379	-5.991	0.654	3.707	3.727	4.225	-3.468	-1.982	0	0	0	12.198	-3.831	9.154			560	-3.719	0.059	-10.026	16.983	16.669	16.822	14.022
570	-1.631	13.407	-9.595	11.539	18.621	-2.966	10.824	13.612	-11.602	19.71	6.184	-5.952	0	0	0	26.119	24.375	14.064			570	3.773	5.852	-3.674	5.398	4.31	-4.61	1.231	4.612	4.551	3.754	-2.939	-0.482	0	0	0	12.343	-3.008	9.654			570	-5.397	2.011	-8.967	15.234	17.106	17.42	12.805
580	-1.181	13.662	-13.074	11.423	19.219	-4.468	10.652	13.715	-12.402	20.237	6.729	-7.431	0	0	0	26.206	25.677	12.58			580	4.641	4.886	-5.15	6.413	3.764	-6.508	0.565	5.01	1.709	4.749	-3.234	-2.107	0	0	0	13.322	-3.203	7.852			580	-5.258	0.425	-8.904	15.975	17.98	17.349	12.738
590	-0.228	14.086	-10.344	10.312	19.529	-2.051	11.124	13.542	-11.367	20.286	6.954	-4.77	0	0	0	27.054	24.473	15.404			590	3.911	4.788	-4.538	5.996	2.663	-6.023	-0.069	5.521	4.573	3.245	-3.137	-0.004	0	0	0	13.018	-3.518	10.467			590	-5.265	3.062	-8.647	15.365	18.609	17.508	12.833
600	-1.407	13.042	-11.934	11.082	17.25	-3.31	10.459	10.968	-13.569	20.177	4.464	-6.397	0	0	0	26.603	23.715	13.855			600	3.935	4.14	-5.665	5.889	4.244	-5.945	-0.262	5.289	4.123	4.021	-4.103	-1.171	0	0	0	12.833	-2.936	9.897			600	-5.025	0.638	-8.667	15.775	18.027	17.261	13.963
610	-1.991	13.774	-14.46	10.403	18.945	-4.621	10.352	13.008	-15.749	19.303	6.215	-7.287	0	0	0	26.601	25.08	13.389			610	4.757	5.333	-2.972	5.759	4.455	-5.548	1.588	6.144	5.273	4.983	-2.842	0.07	0	0	0	13.01	-3.179	10.397			610	-4.75	1.324	-7.993	15.868	20.672	17.081	14.132
620	-2.634	13.826	-12.56	11.546	19.236	-1.48	10.888	13.141	-14.379	19.79	6.661	-5.139	0	0	0	25.982	25.529	13.984			620	3.989	5.283	-4.627	6.022	5.411	-5.953	0.602	5.867	3.7	4.055	-2.629	-1.591	0	0	0	13.601	-3.178	10.911			620	-4.888	0.772	-8.888	16.112	19.596	17.738	14.089
630	-3.493	13.503	-14.33	10.524	18.81	-4.109	9.632	13.222	-14.929	18.78	6.813	-6.368	0	0	0	26.194	25.246	12.812			630	5.029	5.175	-5.008	6.581	5.178	-5.933	1.255	4.925	4.845	4.716	-2.705	-1.359	0	0	0	13.451	-3.423	9.928			630	-3.806	3.217	-8.301	15.267	19.406	17.714	14.972
640	-2.039	13.565	-13.091	11.82	19.134	-2.687	10.884	14.26	-12.774	19.774	6.722	-5.739	0	0	0	26.97	25.147	14.203			640	4.337	5.409	-4.673	6.441	5.817	-6.334	1.044	5.143	3.307	4.333	-2.716	-1.783	0	0	0	13.547	-3.405	9.348			640	-3.718	1.495	-8.875	17.339	19.76	18.046	15.178
650	-1.646	14.133	-13.149	11.49	19.531	-3.67	12.13	14.414	-13.556	19.97	7.158	-6.88	0	0	0	28.192	26.294	13.095			650	3.342	4.781	-3.706	5.918	5.061	-5.242	-0.53	5.023	5.258	3.225	-2.807	-0.059	0	0	0	12.513	-3.731	9.805			650	-3.401	0.667	-7.968	16.031	18.802	19.565	14.77
660	-2.624	14.978	-13.442	10.706	20.091	-2.42	10.743	14.876	-12.545	19.915	8.277	-5.817	0	0	0	27.034	27.325	14.658			660	3.807	4.856	-6.453	7.097	4.754	-7.619	1.66	4.476	4.127	3.93	-3.07	-2.503	0	0	0	14.32	-4.001	9.442			660	-3.332	0.548	-9.796	17.33	20.543	18.91	15.243
670	-2.059	12.829	-13.273	10.457	20.381	-0.981	10.125	14.075	-11.931	19.414	7.435	-5.923	0	0	0	26.698	26.379	16.159			670	3.042	6.214	-3.73	5.12	5.216	-6.352	0.523	6.296	5.469	3.946	-3.372	-0.85	0	0	0	13.227	-3.279	9.616			670	-3.138	3.255	-8.234	17.629	21.555	19.346	14.245
680	-2.025	14.901	-14.313	11.568	19.362	-2.839	11.181	14.055	-13.004	20.296	7.76	-6.138	0	0	0	27.415	26.902	14.65			680	3.969	6.104	-6.444	6.266	5.679	-7.186	1.123	7.067	4.028	3.904	-1.823	-1.583	0	0	0	13.89	-2.504	9.804			680	-5.826	1.902	-7.838	18.362	19.814	19.656	14.194
690	-3.99	14.444	-11.688	10.843	19.504	-2.867	10.442	13.571	-11.022	19.5	7.631	-5.254	0	0	0	26.679	25.462	16.732			690	3.205	5.127	-4.751	5.732	4.505	-6.066	1.106	6.105	3.765	4.142	-2.836	-0.911	0	0	0	14.042	-3.754	9.435			690	-4.062	2.471	-8.562	18.724	20.76	19.91	15.285
700	-1.81	14	-13.947	11.991	19.979	-3.179	10.363	13.466	-13.158	19.957	7.57	-4.156	0	0	0	27.387	26.511	14.744			700	3.705	5.86	-4.673	6.376	4.57	-6.113	1.714	6.592	3.466	4.011	-3.138	-1.219	0	0	0	13.79	-3.655	10.488			700	-3.796	0.528	-6.248	17.548	18.575	20.751	14.666
710	-3.667	15.077	-15.719	9.812	19.912	-4.689	9.253	13.712	-15.239	18.87	7.395	-7.07	0	0	0	26.724	26.114	13.101			710	3.472	4.64	-6.787	6.753	4.014	-7.856	0.504	6.244	2.227	4.496	-3.642	-1.89	0	0	0	13.565	-4.717	8.436			710	-3.601	2.207	-9.69	17.864	20.461	18.644	14.721
720	-2.701	14.932	-14.379	12.17	20.776	-3.062	10.959	14.437	-13.584	19.892	7.898	-6.181	0	0	0	28.465	26.771	14.376			720	3.722	4.955	-7.241	6.264	3.348	-7.168	0.962	6.845	3.107	4.091	-3.376	-3.169	0	0	0	14.027	-4.333	9.449			720	-2.805	2.696	-8.189	17.882	21.321	19.975	13.235
730	-5.401	14.563	-14.354	10.752	19.039	-3.942	9.982	14.215	-13.252	19.475	7.781	-7.825	0	0	0	27.905	27.525	14.255			730	3.941	6.101	-5.899	7.093	5.44	-7.022	0.416	5.158	3.411	3.798	-2.558	-3.425	0	0	0	14.562	-3.49	8.263			730	-0.345	1.162	-9.423	20.085	20.134	20.955	18.434
740	-5.209	14.69	-13.301	10.231	19.155	-2.271	9.432	14.033	-11.451	19.937	7.83	-5.969	0	0	0	26.735	26.25	16.37			740	3.992	5.754	-6.316	7.399	6.096	-5.727	0.969	5.904	4.568	3.732	-3.201	-2.214	0	0	0	14.265	-3.91	9.944			740	-2.319	4.074	-9.556	18.829	20.785	19.199	15.954
750	-3.829	14.791	-13.538	12.268	20.625	-1.401	10.443	14.978	-13.72	19.932	8.575	-6.491	0	0	0	28.089	27.598	14.792			750	4.288	5.673	-5.225	7.11	6.458	-4.717	1.607	6.224	4.45	4.334	-3.119	-1.572	0	0	0	14.652	-3.879	11.428			750	-2.341	0.697	-7.705	18.55	19.336	21.207	15.799
760	-2.459	14.282	-14.627	12.41	20.579	-1.983	11.691	15.025	-13.175	21.899	9.437	-5.931	0	0	0	29.629	27.85	15.016			760	3.363	5.449	-7.085	6.848	6.061	-6.588	1.41	5.958	3.953	4.285	-2.89	-1.91	0	0	0	14.108	-3.836	10.055			760	-2.765	2.78	-8.004	18.468	19.928	21.504	16.129
770	-3.035	15.317	-14.866	11.138	21.653	-2.221	10.522	15.521	-13.33	21.488	9.583	-6.202	0	0	0	28.579	28.821	14.783			770	3.522	5.284	-6.183	5.866	5.945	-6.656	0.907	5.789	3.914	4.033	-3.039	-1.959	0	0	0	14.303	-4.512	9.611			770	-1.552	-1.393	-7.536	19.295	19.015	21.276	16.043
780	-4.073	14.112	-14.703	11.55	20.53	-1.874	11.001	14.587	-12.822	20.874	8.809	-5.528	0	0	0	28.991	27.632	15.822			780	4.848	5.143	-6.184	7.041	5.657	-6.873	2.223	5.934	5.131	4.354	-2.923	-2.03	0	0	0	14.96	-4.553	10.061			780	-2.2	1.259	-8.311	18.889	20.737	21.955	16.46
790	-4.404	14.014	-16.101	11.072	20.474	-3.354	10.442	13.988	-12.924	20.531	8.766	-6.926	0	0	0	28.998	27.655	14.426			790	3.223	5.213	-5.605	7.346	3.924	-7.607	1.568	5.789	3.226	4.551	-2.847	-1.388	0	0	0	14.604	-5.658	9.408			790	-2.524	-0.698	-7.961	19.083	20.25	21.376	14.424
800	-3.258	12.977	-17.146	12.764	21.269	-3.786	11.669	13.274	-12.114	21.171	7.925	-5.591	0	0	0	30.019	28.276	15.904			800	4.646	4.383	-6.243	8.025	5.321	-7.219	2.549	7.326	3.172	4.616	-4.325	-3.307	0	0	0	15.654	-4.675	9.643			800	-1.504	1.673	-8.671	19.914	19.599	20.233	16.951
810	-5.334	14.906	-15.102	11.706	21.13	-1.835	10.902	14.325	-11.606	21.256	9.077	-4.76	0	0	0	29.655	27.973	16.524			810	3.797	5.195	-7.845	6.931	5.128	-7.264	1.182	7.187	3.631	4.113	-2.879	-2.146	0	0	0	14.889	-4.501	8.53			810	-1.621	1	-10.657	19.856	21.48	20.951	16.926
820	-5.102	14.777	-12.918	11.122	19.768	-0.497	10.62	14.385	-11.09	22.444	8.178	-4.606	0	0	0	29.651	26.985	16.953			820	2.894	5.709	-5.194	6.432	4.82	-6.933	0.517	6.551	3.996	4.631	-3.184	-1.883	0	0	0	14.649	-4.973	9.962			820	0.8	4.471	-8.836	21.357	22.172	21.774	18.202
830	-4.102	14.822	-15.092	10.73	21.229	-1.615	12.155	14.965	-11.417	20.937	8.633	-4.676	0	0	0	29.152	28.583	16.31			830	4.122	6.12	-6.637	6.963	5.732	-7.122	1.022	8.144	4.897	4.218	-2.002	-1.232	0	0	0	15.953	-4.445	9.795			830	-0.552	3.16	-7.132	20.093	22.396	22.149	17.033
840	-5.133	14.413	-17.763	9.276	21.222	-2.589	9.968	14.497	-12.857	21.187	8.595	-5.051	0	0	0	28.05	27.614	15.924			840	3.593	5.28	-5.186	7.121	5.004	-6.553	1.26	7.323	5.154	4.203	-3.089	-1.746	0	0	0	14.849	-5.048	11.539			840	-1.463	5.399	-6.317	18.567	23.558	22.356	17.092
850	-5.2	13.882	-15.687	10.797	20.186	-2.084	11.279	14.185	-12.281	21.387	8.108	-5.161	0	0	0	29.395	27.426	16.246			850	3.793	4.733	-5.69	7.306	5.443	-6.229	1.434	6.352	4.337	4.202	-2.892	-1.498	0	0	0	15.584	-4.834	10.18			850	-1.028	2.805	-7.491	19.74	21.373	23.268	16.867
860	-4.523	13.315	-17.698	11.185	18.255	-2.652	11.498	13.422	-14.19	22.428	7.342	-6.279	0	0	0	30.318	26.725	15.21			860	3.997	5.612	-5.192	7.418	6.037	-7.293	1.586	6.445	5.085	5.052	-2.698	-1.938	0	0	0	15.672	-4.785	10.162			860	-1.899	-0.149	-8.908	20.553	18.244	21.348	16.362
870	-4.882	13.328	-15.183	10.938	20.62	-0.162	11.37	13.532	-11.373	22.048	7.777	-3.654	0	0	0	31.012	27.219	16.065			870	4.701	5.31	-5.155	7.38	5.597	-6.567	2.215	6.428	4.394	5.237	-3.093	-2.072	0	0	0	15.907	-4.306	10.403			870	-0.388	1.593	-7.848	18.33	21.605	22.005	15.47
880	-4.229	12.546	-17.427	11.25	19.477	-2.558	11.612	12.752	-14.09	22.169	7.465	-4.928	0	0	0	30.86	27.187	15.254			880	4.528	5.853	-5.864	8.012	6.03	-7.061	1.534	6.758	5.009	4.614	-2.427	-2.29	0	0	0	15.914	-4.093	10.334			880	-0.539	2.615	-7.545	20.52	21.784	23.597	16.871
890	-5.179	13.905	-16.609	11.439	20.744	-1.583	11.282	13.816	-12.881	22.107	8.322	-4.739	0	0	0	30.614	27.296	16.689			890	4.014	5.25	-7.424	7.368	5.904	-6.635	1.628	6.753	4.281	4.663	-2.696	-1.803	0	0	0	15.826	-4.749	10.424			890	-0.948	2.235	-8.119	19.235	22.075	22.831	15.9
900	-6.203	14.648	-14.778	11.341	21.608	-1.054	11.696	14.464	-12.33	22.075	9.286	-3.589	0	0	0	29.503	28.687	18.769			900	3.265	5.695	-5.415	6.552	5.775	-6.676	0.614	6.093	4.322	3.567	-3.466	-2.059	0	0	0	15.182	-5.133	11.161			900	0.66	4.366	-7.594	21.445	23.922	25.042	18.404
910	-5.799	14.801	-16.357	11.596	21.892	-1.842	11.388	15.052	-12.897	21.96	9.681	-4.28	0	0	0	30.763	28.803	17.25			910	3.455	6.236	-7.253	6.847	6.045	-7.293	0.768	6.957	4.101	3.843	-2.449	-3.089	0	0	0	15.592	-4.383	9.453			910	0.278	3.677	-10.613	21.467	24.466	22.877	18.35
920	-4.369	14.45	-14.404	11.182	21.663	-1.005	11.686	14.957	-12.072	22.46	9.869	-3.591	0	0	0	32.298	28.87	17.644			920	3.689	6.472	-6.372	7.401	6.036	-5.88	2.064	7.54	4.085	4.943	-2.262	-1.588	0	0	0	16.036	-4.991	10.356			920	0.186	4.984	-8.795	20.607	24.764	24.036	17.591
930	-5.132	15.047	-17.6	11.682	20.427	-2.088	12.123	15.308	-11.635	22.977	10.244	-4.417	0	0	0	30.918	29.569	17.074			930	4.178	4.246	-6.567	7.517	5.354	-6.237	1.558	6.913	3.904	4.599	-3.045	-2.364	0	0	0	16.513	-5.31	10.131			930	-0.443	4.46	-8.837	20.169	23.887	23.353	17.167
940	-6.321	13.624	-15.646	11.967	20.624	-0.712	10.849	14.38	-11.495	23.653	8.83	-4.538	0	0	0	31.661	28.312	17.202			940	4.392	6	-6.433	6.876	5.711	-7.582	1.938	8.622	3.89	5.03	-2.047	-3.437	0	0	0	16.292	-4.829	9.267			940	-0.468	1.583	-9.064	20.477	22.54	22.028	16.852
950	-5.749	13.676	-16.594	11.274	21.073	-1.302	11.603	13.96	-11.007	22.385	8.737	-4.249	0	0	0	31.298	27.971	17.639			950	3.134	5.806	-5.938	6.546	6.118	-5.752	1.355	8.88	3.611	3.415	-2.468	-2.86	0	0	0	15.33	-5.377	9.996			950	-0.802	3.37	-9.743	19.104	23.42	21.921	17.369
960	-5.855	13.968	-17.09	11.652	21.607	-1.54	11.863	14.888	-11.575	22.472	9.287	-4.932	0	0	0	32.25	29.006	18.688			960	4.036	5.112	-7.934	7.392	5.092	-7.445	1.821	9.078	2.986	4.407	-2.847	-3.075	0	0	0	17.072	-5.381	9.604			960	-0.8	3.346	-9.2	19.079	21.977	23.722	17.046
970	-6.543	14.529	-17.012	11.397	21.686	-1.71	11.935	14.671	-11.968	21.344	9.243	-4.704	0	0	0	31.172	29.23	17.257			970	3.524	6.425	-7.886	7.412	6.17	-6.361	1.601	10.161	4.429	4.559	-1.755	-2.181	0	0	0	16.403	-4.02	10.79			970	-0.898	2.498	-6.138	19.671	23.776	26.28	16.562
980	-7.05	14.234	-17.594	11.349	21.772	-2.876	12.176	14.712	-11.701	22.612	9.254	-5.754	0	0	0	31.214	28.62	17.511			980	3.856	6.187	-6.619	7.605	5.566	-5.839	0.644	8.149	4.183	4.499	-2.685	-1.924	0	0	0	15.832	-5.468	10.577			980	0.042	1.05	-8.356	21.924	23.505	23.953	17.955
990	-8.333	14.51	-17.608	10.33	21.371	-1.373	11.093	13.018	-10.43	22.519	9.047	-4.168	0	0	0	30.061	29.113	19.142			990	3.845	5.58	-6.563	8.579	5.631	-6.043	2.041	7.44	5.346	5.405	-2.261	-2.146	0	0	0	16.665	-5.585	10.833			990	-0.54	4.333	-9.625	20.742	25.777	24.653	16.801
1000	-5.694	12.676	-16.157	12.29	21.497	0.467	11.695	13.959	-12.218	22.5	7.932	-3.854	0	0	0	32.477	29.08	18.237			1000	4.622	5.914	-7.557	7.487	5.83	-5.205	1.855	7.503	3.955	4.93	-3.006	-2.693	0	0	0	17.106	-5.255	11.64			1000	-2.205	4.303	-7.552	20.82	25.517	25.391	16.817
1010	-5.972	13.107	-18.657	10.779	20.651	-1.266	12.34	13.134	-12.245	22.373	8.654	-4.029	0	0	0	32.675	29.313	17.653			1010	3.731	5.435	-8.105	8.109	5.981	-6.257	1.51	7.285	4.129	5.109	-1.229	-3.733	0	0	0	17.172	-5.412	10.836			1010	0.072	4.308	-6.295	21.284	25.395	26.403	17.501
1020	-7.612	14.147	-18.014	11.239	21.837	-1.328	11.786	14.179	-12.795	23.02	9.746	-5.389	0	0	0	32.233	27.952	17.755			1020	3.682	5.659	-7.151	7.391	5.971	-6.129	1.298	8.188	3.855	4.465	-1.109	-2.348	0	0	0	16.935	-5.608	10.726			1020	0.633	3.454	-8.934	21.754	25.565	24.804	17.984
1030	-7.495	14.557	-17.71	12.222	21.805	-0.539	10.869	14.656	-12.305	22.686	9.877	-3.724	0	0	0	31.723	29.014	18.391			1030	4.646	6.094	-7.372	7.567	6.093	-7.409	1.072	8	4.08	4.587	-0.189	-3.162	0	0	0	17.385	-6.323	10.057			1030	-0.073	4.482	-7.691	21.524	25.225	25.376	17.209
1040	-8.65	13.861	-19.929	10.267	21.451	-1.488	11.513	14.093	-13.654	21.762	9.255	-4.929	0	0	0	31.456	29.085	18.038			1040	3.733	6.37	-7.339	7.997	6.373	-6.347	1.096	8.059	4.797	3.939	-1.117	-2.699	0	0	0	16.819	-5.8	10.672			1040	-0.344	4.756	-8.192	20.65	26.244	25.287	16.445
1050	-6.117	13.972	-18.499	12.514	21.836	0.061	11.463	13.645	-11.447	23.775	9.525	-2.2	0	0	0	33.488	29.6	19.549			1050	3.949	6.396	-7.433	7.431	6.34	-4.997	1.291	7.808	3.838	4.339	-1.599	-2.211	0	0	0	17.395	-5.891	11.618			1050	0.164	4.59	-5.318	20.695	25.24	26.942	17.248
1060	-7.246	13.358	-18.364	11.808	20.102	-2.889	11.97	13.835	-12.546	24.086	9.546	-5.289	0	0	0	32.9	29.754	17.94			1060	3.502	6.542	-7.451	7.336	6.312	-6.034	1.316	7.517	3.706	4.116	-1.634	-2.549	0	0	0	17.039	-5.406	10.398			1060	0.176	3.027	-7.073	21.334	24.105	25.586	18.36
1070	-7.251	13.764	-18.178	11.401	21.511	-0.853	11.792	14.986	-12.475	23.697	8.964	-2.426	0	0	0	32.752	29.938	18.6			1070	4.214	6.609	-7.277	8.356	6.254	-5.985	1.475	8.906	4.277	4.667	-2.632	-2.327	0	0	0	17.155	-5.454	10.972			1070	-0.027	2.37	-5.433	21.017	23.622	26.566	17.621
1080	-6.342	13.84	-19.522	11.649	21.642	-0.082	11.055	14.738	-12.897	23.816	9.913	-4.307	0	0	0	32.594	29.901	18.577			1080	4.168	6.258	-5.717	8.612	6.005	-6.22	2.683	8.853	5.324	4.728	-1.685	-0.949	0	0	0	17.569	-5.295	11.269			1080	0.569	2.527	-5.786	22.403	23.656	26.214	18.02
1090	-6.547	13.773	-19.048	11.403	21.538	-0.783	11.933	15.192	-10.957	23.841	10.201	-2.927	0	0	0	33.74	29.157	18.585			1090	3.933	6.467	-8.469	8.402	5.882	-7.383	2.254	8.788	4.685	5.261	-1.735	-3.454	0	0	0	18.244	-5.602	10.003			1090	0.803	5.643	-6.545	22.003	26.181	25.215	18.62
1100	-7.501	12.87	-19.028	11.811	20.925	-1.293	11.482	15.327	-12.559	23.778	9.517	-4.547	0	0	0	32.536	28.811	18.382			1100	3.982	6.976	-7.315	7.834	6.286	-6.35	1.525	9.296	3.876	4.912	-1.83	-2.812	0	0	0	17.693	-5.742	10.771			1100	-0.275	4.246	-6.809	21.536	26.346	26.741	17.964
1110	-7.986	13.548	-19.6	11.659	21.306	-1.146	11.509	15.331	-13.069	23.889	10.295	-5.133	0	0	0	32.293	29.558	18.224			1110	3.782	6.073	-6.716	7.593	6.187	-6.108	0.976	8.916	3.769	4.211	-1.436	-1.557	0	0	0	18.098	-6.686	10.967			1110	0.023	4.603	-7.386	22.089	26.603	25.666	17.892
1120	-8.316	14.423	-17.839	12.654	21.818	-1.544	12.388	14.504	-11.385	24.682	10.394	-4.485	0	0	0	32.529	29.962	18.02			1120	3.779	5.75	-7.991	7.752	5.174	-6.431	1.16	8.291	4.389	4.911	-1.276	-2.956	0	0	0	18.365	-6.042	10.18			1120	1.509	4.821	-6.417	22.885	25.257	27.073	18.843
1130	-7.708	13.982	-19.156	12.532	21.31	-1.064	11.585	15.868	-12.7	23.343	9.475	-3.089	0	0	0	32.661	30.738	18.393			1130	3.627	6.179	-8.021	8.225	5.962	-5.919	1.413	7.838	4.646	4.837	-1.464	-2.145	0	0	0	17.398	-6.213	11.72			1130	1.267	5.377	-7.47	22.887	27.732	27.153	18.311
[truncated: 30 more columns]
