# Supplementary figures and images for: Autophagosome membrane expansion is mediated by the N-terminus and cis-membrane association of human ATG8s
Source: eLife journal article supplement (doi:10.7554/elife.89185), 2023-06-08

C

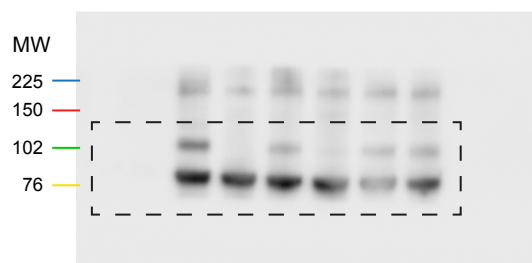

ATG7

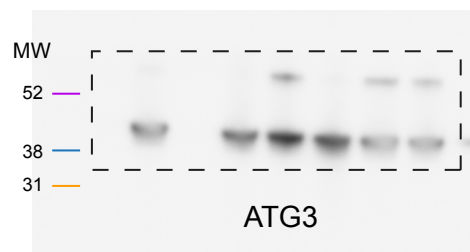

ATG3

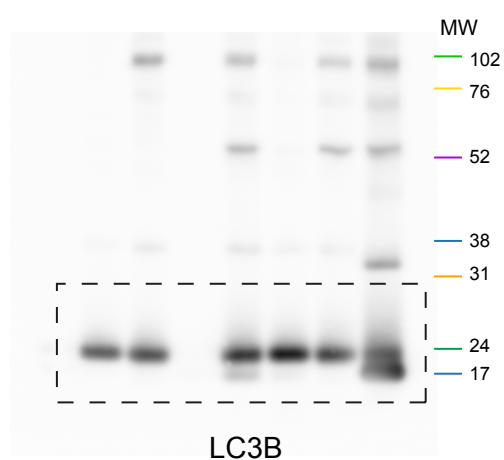

LC3B

E

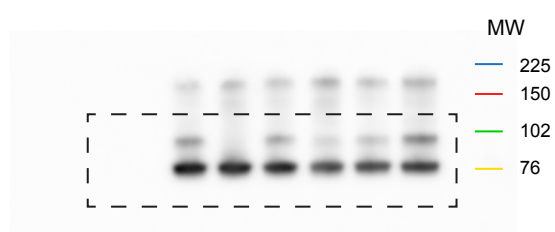

ATG7

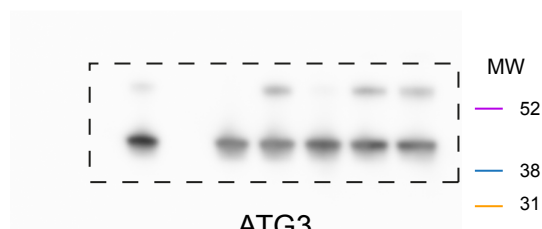

ATG3

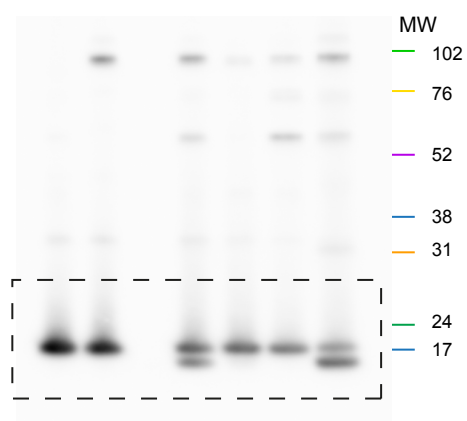

GABARAP

Figure 1

Supplement: fig1-data1 [file elife-89185-fig1-data1-v2.zip]

B

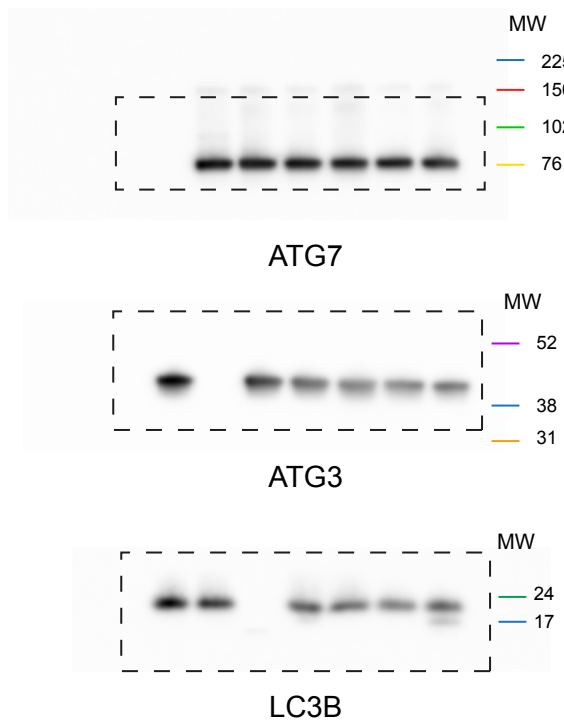

C

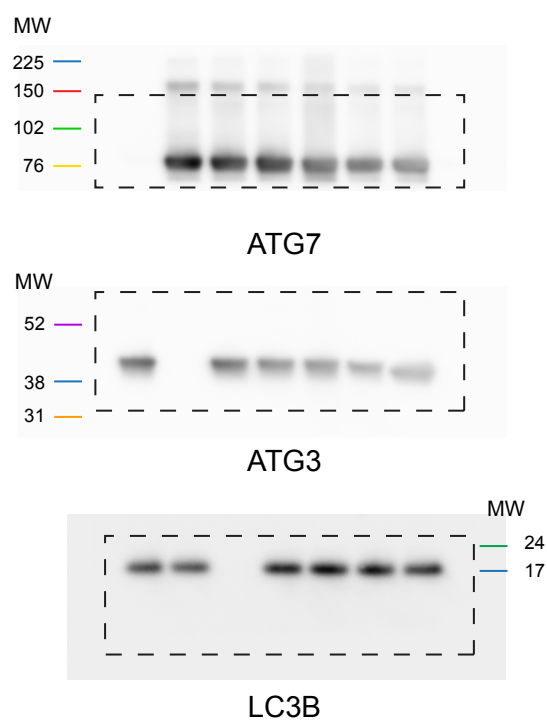

D

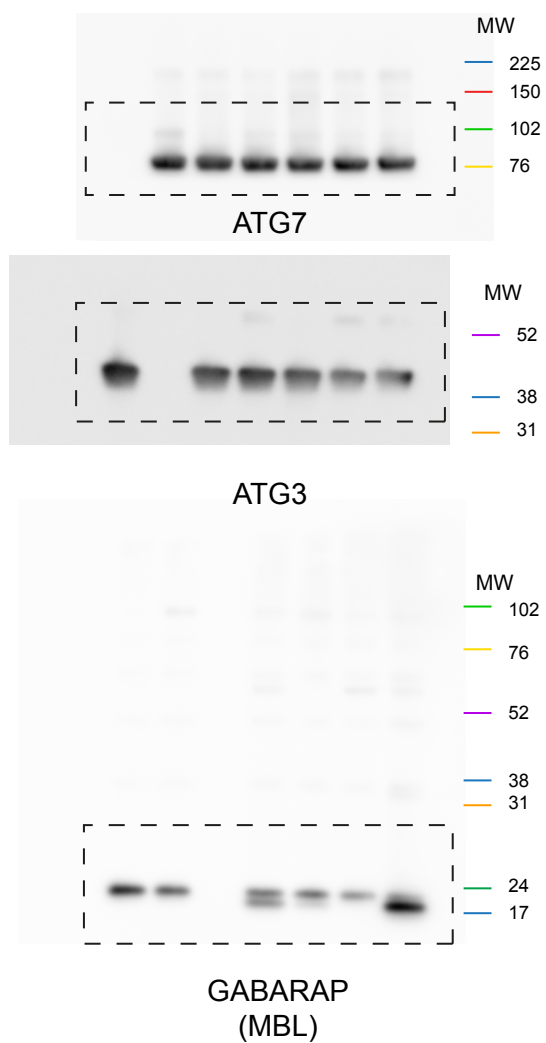

E

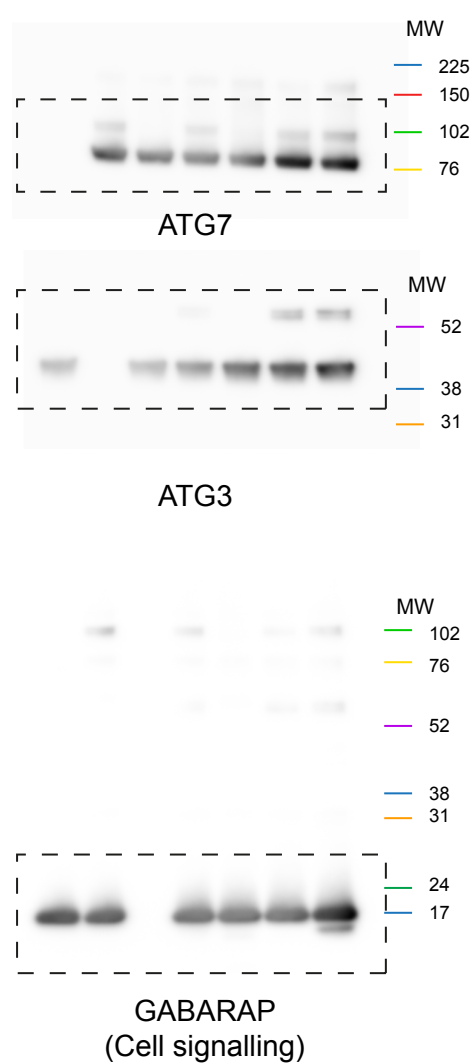

Figure 5

Supplement: fig5-data1 [file elife-89185-fig5-data1-v2.zip]

A

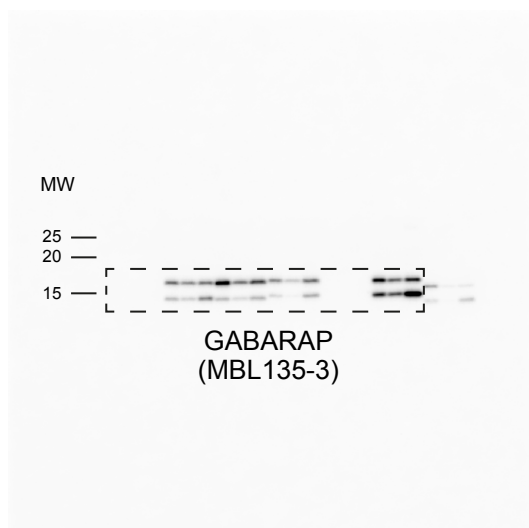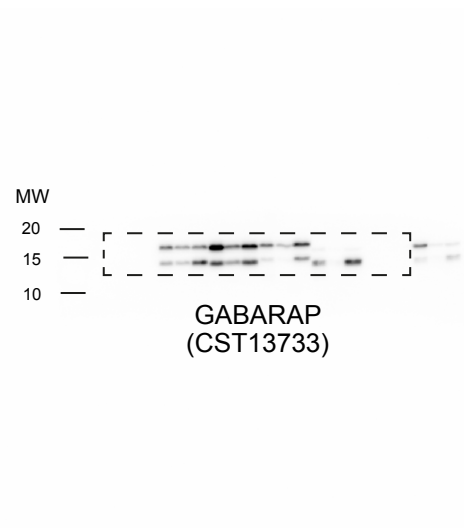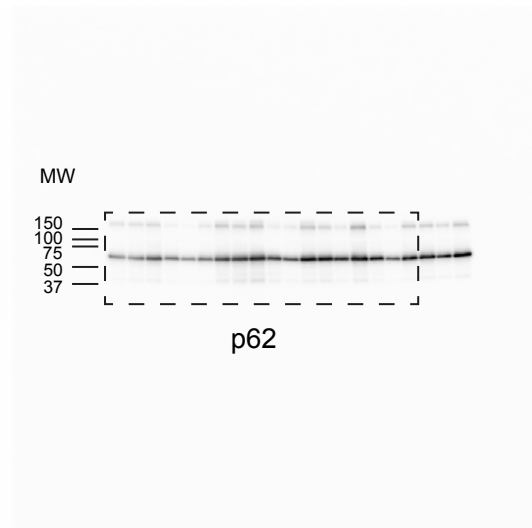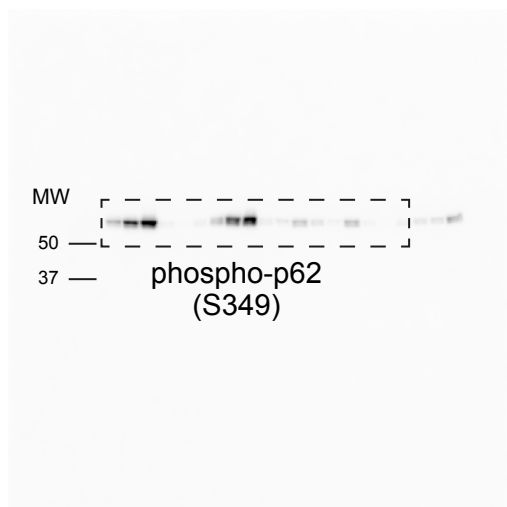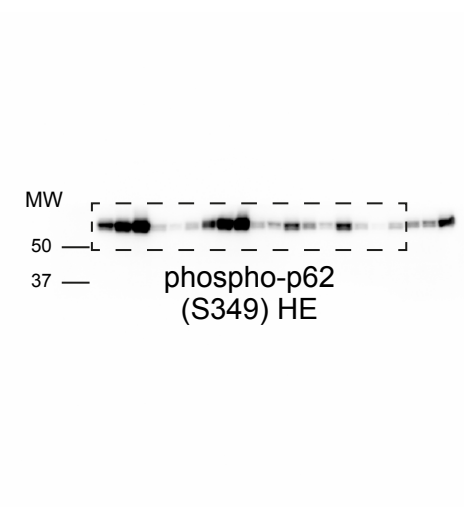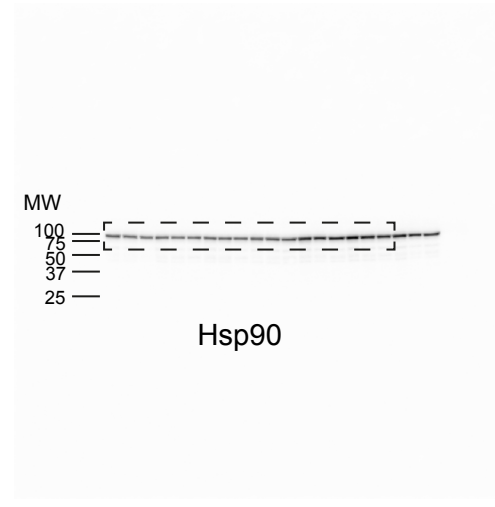

F

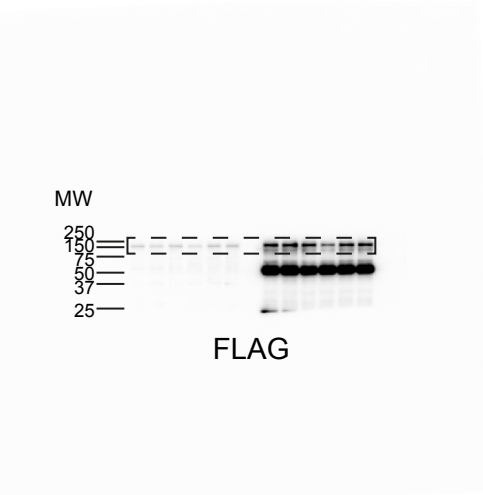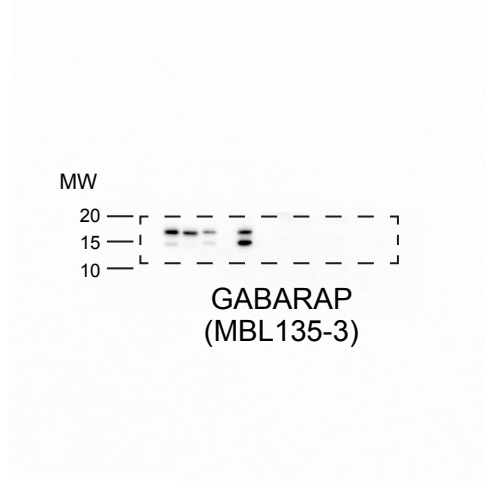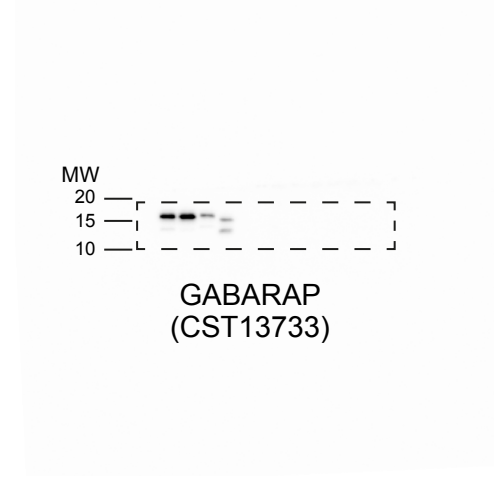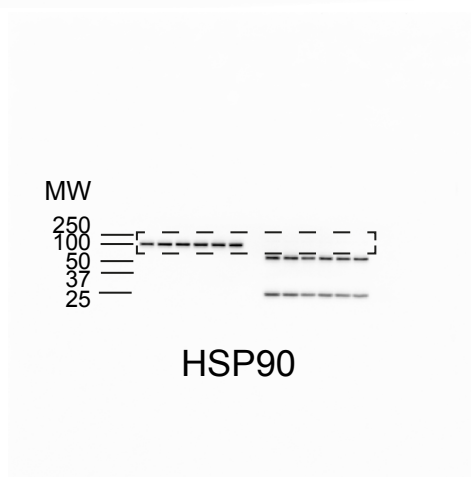

Figure 6

Supplement: fig6-data1 [file elife-89185-fig6-data1-v2.zip]
